# Supplementary material for: Mapping responses to focal injections of bicuculline in the lateral parafacial region identifies core regions for maximal generation of active expiration
Source: eLife. 2024 Jul 17;13:RP94276. doi: 10.7554/eLife.94276 (PMC11254382; doi:10.7554/eLife.94276)
Supplement: Figure 1—source data 1. [file elife-94276-fig1-data1.xlsx]

## Sheet: Sheet1
A							B/C/D/E	Mean-Cycles
								Baseline					Response
Raw DIA	Raw ABD	Integrated ABD	Airflow	Integrated DIA			ABD	Air	DIA			ABD	AIR	DIA
-0.0025	0.0209375	0.00255256	0.0040625	0.00206484			-0.00441596	-1.20358	0.494099			0.226539	0.00233878	-0.000283315
-0.0025	-0.00125	0.00253022	0.0040625	0.00204169			-0.00398629	-1.20129	0.488062			0.221944	0.00109846	-0.00041616
0.008125	0.0315625	0.00253567	0.005	0.00202446			-0.00402908	-1.19976	0.482345			0.221372	0.00547224	-0.000436101
0.0328125	0.005	0.00250886	0.0059375	0.00203212			-0.00370425	-1.19739	0.476383			0.218877	0.0056028	-0.000467466
0.0078125	0.0025	0.00247957	0.005625	0.00201469			-0.00379056	-1.19265	0.470627			0.216772	0.00455831	-0.000519447
-0.010625	-0.0103125	0.00247408	0.0078125	0.00200029			-0.00466384	-1.1894	0.46501			0.216695	0.00416663	-0.000435928
0.0075	0.026875	0.00247834	0.0071875	0.00198294			-0.00456431	-1.1868	0.459524			0.215119	0.00135958	-0.000537574
0.0178125	0.0009375	0.00247568	0.0065625	0.00197612			-0.0043829	-1.18562	0.453868			0.213792	-0.000990515	-0.000462907
-0.0075	-0.0159375	0.00246649	0.0071875	0.00195907			-0.00433534	-1.18599	0.448255			0.21424	0.00331799	-0.000546323
0.0034375	0.0109375	0.00243741	0.0078125	0.00193817			-0.00419218	-1.18573	0.442745			0.21251	0.00762649	-0.000542086
0.029375	-0.016875	0.00241526	0.0090625	0.00194347			-0.00551144	-1.18227	0.437463			0.20936	0.00501527	-0.000529863
-0.00375	-0.0003125	0.00239807	0.0078125	0.00192308			-0.00469876	-1.17937	0.432044			0.207045	0.000902614	-0.000557469
-0.01125	0.0146875	0.00250109	0.0075	0.00191044			-0.00404547	-1.17812	0.426672			0.208886	0.00318743	-0.000483853
-0.0165625	-0.0153125	0.00249659	0.00625	0.00190327			-0.00319636	-1.17768	0.421543			0.210915	0.00403607	-0.000529405
0.02625	-0.0146875	0.00250776	0.0071875	0.00190588			-0.00318125	-1.17483	0.416379			0.215014	0.00423191	-0.000369262
0.020625	0.019375	0.00250192	0.0075	0.00190283			-0.00259222	-1.17009	0.411278			0.217579	0.00743064	-0.000432057
0.0090625	0.0259375	0.00251022	0.0084375	0.00188825			-0.0034496	-1.1639	0.406158			0.224334	0.00782233	-0.000485514
0.0053125	-0.0109375	0.00249341	0.00875	0.00187011			-0.00280413	-1.15748	0.401202			0.226899	0.00122902	-0.000528454
-0.0265625	-0.02125	0.00250275	0.0071875	0.00187344			-0.00371814	-1.15355	0.396324			0.235462	0.000119251	-0.000352502
-0.0325	0.0225	0.00250853	0.008125	0.00188267			-0.00378042	-1.14931	0.391439			0.236605	0.00671256	-0.000324999
-0.011875	0.006875	0.0024905	0.009375	0.00187116			-0.00439756	-1.14442	0.386681			0.234785	0.00736536	-0.000386529
-0.0075	0.0284375	0.00248112	0.0103125	0.00185541			-0.00441215	-1.1374	0.381883			0.231553	0.00253462	-0.000310108
0.003125	0.0175	0.00248343	0.0103125	0.00183549			-0.00457279	-1.13192	0.377218			0.228003	0.00188182	-0.000311399
0.015	0.013125	0.00246476	0.01	0.00182769			-0.00453749	-1.12868	0.37263			0.227151	0.000706774	-0.000413035
-0.005	0.010625	0.00243883	0.010625	0.00180999			-0.00475813	-1.12653	0.368099			0.228308	-0.000729394	-0.000515743
-0.0040625	0.043125	0.0024426	0.01	0.00179156			-0.00470745	-1.12405	0.363578			0.230229	0.00135958	-0.000537559
0.0128125	0.008125	0.00241632	0.010625	0.00178212			-0.00429878	-1.12005	0.359086			0.23376	0.0069084	-0.00065428
-0.00375	0.0334375	0.00238756	0.0115625	0.00176373			-0.00421532	-1.11592	0.354664			0.232361	0.00305686	-0.000706015
-0.0109375	-0.11125	0.00238758	0.0103125	0.00175276			-0.00421218	-1.11162	0.350332			0.231718	-0.00210028	-0.000684493
0.0090625	0.063125	0.00238261	0.009375	0.00174005			-0.00420444	-1.10898	0.345992			0.230533	-0.000141869	-0.000735333
-0.0146875	0.009375	0.00235895	0.01	0.00173312			-0.00370275	-1.10623	0.341807			0.228946	0.00605976	-0.000736788
0.0046875	0.0103125	0.00235809	0.010625	0.00171628			-0.0033889	-1.10102	0.337537			0.226541	0.00494999	-0.000558249
-0.008125	-0.0834375	0.00234817	0.0103125	0.00170309			-0.00255642	-1.09326	0.333553			0.227788	0.00475415	-0.000625958
0.0103125	0.0384375	0.00232775	0.0103125	0.00169224			-0.00259311	-1.08598	0.329456			0.230208	0.00488471	-0.00054786
0.01125	0.0146875	0.0023279	0.0109375	0.00168247			-0.00381988	-1.07886	0.325327			0.230756	0.00181654	-0.000534268
0.015	-0.019375	0.00232085	0.009375	0.00167657			-0.00229097	-1.07367	0.321327			0.230389	-0.000794673	-0.000565969
0.01125	0.0090625	0.00229796	0.0109375	0.00166699			-0.00129589	-1.06762	0.317428			0.229487	0.00462359	-0.000565378
-0.00125	-0.0153125	0.00229098	0.0125	0.00164754			-0.00114738	-1.06146	0.313549			0.227496	0.006582	-0.000574908
-0.003125	-0.0115625	0.00227439	0.0125	0.0016302			-0.000911451	-1.05318	0.309751			0.227819	0.0012943	-0.000672233
0.024375	0.0284375	0.00227739	0.0115625	0.00163432			-0.00106863	-1.04593	0.306013			0.225886	0.000315092	-0.000626755
0.0040625	0.0121875	0.00227129	0.0125	0.00161808			-0.00139469	-1.042	0.302226			0.228292	0.000772054	-0.000661715
0.0153125	-0.015625	0.0022637	0.0121875	0.00161329			-0.00201607	-1.03948	0.298499			0.225277	0.00135958	-0.000672124
0.00625	0.001875	0.0022412	0.011875	0.0015995			-0.00110521	-1.03511	0.294805			0.225067	0.00175126	-0.000577114
-0.0021875	-0.006875	0.0022468	0.0121875	0.00158182			-0.00132693	-1.02911	0.291131			0.221454	0.0062556	-0.000594538
-0.0134375	0.03125	0.00229233	0.0128125	0.00157561			-0.00140353	-1.02455	0.287464			0.218415	0.00410135	-0.000615376
0.019375	0.0396875	0.00230323	0.011875	0.00157541			-0.00201094	-1.02078	0.283895			0.214904	-0.00112108	-0.000643476
0.015625	-0.075625	0.00232368	0.01125	0.00157147			-0.00112247	-1.01621	0.280385			0.215705	0.00155542	-0.00078222
0.010625	0.03625	0.00230138	0.0109375	0.00156257			-0.00077141	-1.01175	0.276946			0.21243	0.00808345	-0.000866597
-0.0415625	-0.0603125	0.00228498	0.011875	0.00158472			-0.0008449	-1.0055	0.27351			0.212786	0.00651672	-0.000824409
-0.0184375	0.0303125	0.00226315	0.0115625	0.00158347			-0.00137152	-0.996004	0.270133			0.214326	0.00246934	-0.000798306
0.0128125	-0.0059375	0.00223754	0.011875	0.00157662			-0.00134829	-0.987151	0.266788			0.212298	0.00410135	-0.000860958
-0.013125	0.0184375	0.00222474	0.0115625	0.00157016			-0.00133074	-0.981784	0.263525			0.21296	0.00370967	-0.000844773
0.0125	0.019375	0.00220992	0.0115625	0.00156315			-0.00165893	-0.974754	0.260229			0.220486	0.00188182	-0.000833718
0.05625	-0.0003125	0.00220497	0.0115625	0.00159998			-0.0019061	-0.966754	0.257076			0.224264	0.00397079	-0.000889965
0.0159375	-0.0309375	0.00218789	0.01375	0.00159605			-0.00223022	-0.959225	0.253911			0.226	0.00664728	-0.000929955
0.0065625	0.0053125	0.00217353	0.01375	0.00158278			-0.0025534	-0.951122	0.250771			0.223557	0.00534167	-0.00098371
0.016875	0.0003125	0.00216028	0.0125	0.00158			-0.00309882	-0.94396	0.247632			0.22328	-1.13067e-05	-0.00102772
0.016875	0.0046875	0.00213469	0.0125	0.00157724			-0.00368364	-0.93996	0.24449			0.221909	0.00318742	-0.00111605
-0.025	-0.0203125	0.00211723	0.0134375	0.00158265			-0.0045821	-0.936651	0.241515			0.223087	0.00547223	-0.00104172
0.006875	0.0221875	0.00210718	0.0134375	0.00156987			-0.00478372	-0.931563	0.238555			0.22302	0.00423191	-0.00112313
0.0178125	0.023125	0.00209132	0.013125	0.00156818			-0.00438795	-0.924607	0.235731			0.222004	0.00331798	-0.000971172
0.0178125	0.0109375	0.00207097	0.0134375	0.00156651			-0.00446962	-0.919636	0.232836			0.221094	0.00579864	-0.000955952
0.0146875	0.0153125	0.00206774	0.0125	0.00156174			-0.00509128	-0.915165	0.229957			0.221851	0.00351383	-0.00098786
0.0153125	0.046875	0.00205112	0.01125	0.00155765			-0.00512804	-0.910577	0.227197			0.222756	0.00377495	-0.000801794
0.0003125	0.0059375	0.00206658	0.0125	0.00153861			-0.00485728	-0.905004	0.224406			0.222178	0.0099113	-0.000752113
0.0021875	-0.0315625	0.00204278	0.0128125	0.00152169			-0.00445291	-0.896562	0.221566			0.22533	0.0106947	-0.00080341
0.003125	0.0309375	0.00203928	0.0125	0.00150591			-0.00500936	-0.887371	0.218848			0.227271	0.00390551	-0.000769009
-0.0021875	-0.0309375	0.00203895	0.0115625	0.00148939			-0.00519335	-0.879165	0.216106			0.228174	0.00390551	-0.000810501
0.014375	0.000625	0.00202893	0.0121875	0.00148526			-0.00563672	-0.873547	0.213455			0.228211	0.00795289	-0.000777568
-0.014375	0.029375	0.00201404	0.0115625	0.00148119			-0.00529115	-0.866709	0.210782			0.227575	0.00762649	-0.000818435
-0.003125	-0.003125	0.00200965	0.0125	0.00146591			-0.00569482	-0.857312	0.208188			0.229233	0.00677784	-0.000828712
0.00375	0.001875	0.00199624	0.01375	0.00145145			-0.00584875	-0.849238	0.205653			0.229804	0.00847513	-0.00100146
0.0309375	-0.00375	0.00197738	0.014375	0.00146436			-0.00626705	-0.842209	0.203183			0.228693	0.00599448	-0.00110412
-0.00125	-0.0140625	0.00199407	0.0128125	0.00144742			-0.005475	-0.835841	0.200675			0.228817	0.00279574	-0.00109529
0.021875	0.0078125	0.00199774	0.0128125	0.00145132			-0.00610802	-0.831268	0.198178			0.229741	0.00612504	-0.00107049
-0.020625	0.0075	0.00198136	0.01375	0.00145391			-0.0060829	-0.8279	0.195738			0.229868	0.0111516	-0.00105948
-0.0228125	0.025	0.00196268	0.014375	0.00145866			-0.00585569	-0.821944	0.193352			0.229236	0.00978074	-0.000984296
-0.006875	-0.0015625	0.00195674	0.013125	0.00144742			-0.00586295	-0.815356	0.190976			0.228133	0.00651672	-0.000984992
-0.0065625	0.01125	0.00196274	0.0140625	0.001436			-0.00557844	-0.810944	0.188584			0.226264	0.00821401	-0.000836823
0.00625	-0.0103125	0.00196993	0.0128125	0.00142441			-0.00537828	-0.80565	0.186202			0.230951	0.00965018	-0.000867099
0.000625	-0.0140625	0.0019642	0.0128125	0.00140734			-0.00551767	-0.800694	0.183885			0.231528	0.00867097	-0.000954311
0.02375	0.0325	0.00197793	0.0128125	0.00141361			-0.00515974	-0.795488	0.181583			0.233717	0.0128489	-0.00110631
-0.001875	-0.051875	0.0020518	0.01375	0.00139793			-0.00487551	-0.786826	0.179335			0.234481	0.0149379	-0.00107333
0.0034375	0.051875	0.00204975	0.01375	0.001384			-0.00504577	-0.777738	0.17713			0.231892	0.00991129	-0.00109341
0.0115625	0.0484375	0.00205303	0.0125	0.00137837			-0.0050477	-0.769797	0.174971			0.229571	0.0069084	-0.00114643
-0.01875	-0.0371875	0.00204128	0.0134375	0.00138			-0.00465635	-0.763502	0.172762			0.230653	0.011935	-0.00125222
0.0209375	-0.014375	0.00225467	0.014375	0.00138379			-0.00450303	-0.757267	0.170613			0.233075	0.0148073	-0.00138444
0.0090625	0.013125	0.00243198	0.015	0.00137566			-0.00475104	-0.748723	0.1685			0.231846	0.0123267	-0.00137083
0.01125	0.0296875	0.00246614	0.0153125	0.00136982			-0.00489515	-0.740282	0.166396			0.232856	0.0125225	-0.00150391
-0.004375	-0.005	0.00247176	0.01625	0.00135718			-0.00557694	-0.73387	0.164378			0.233053	0.0118044	-0.00147014
0.0065625	-0.02125	0.00247637	0.0153125	0.00134689			-0.00569155	-0.728267	0.162348			0.236617	0.00945433	-0.00149229
0.000625	0.0284375	0.0024581	0.015	0.00133078			-0.0046827	-0.724958	0.160336			0.236444	0.011478	-0.00148097
-0.004375	0.0078125	0.00244132	0.0159375	0.00131862			-0.00491462	-0.72087	0.158365			0.240481	0.0178755	-0.00159427
0.014375	-0.005625	0.00242599	0.0171875	0.00131662			-0.00488893	-0.714987	0.156429			0.241305	0.0181366	-0.00156353
-0.025	-0.0121875	0.00244679	0.01625	0.00132526			-0.00409168	-0.708796	0.154489			0.244425	0.0129142	-0.00150776
0.0075	0.0125	0.00242015	0.0153125	0.0013163			-0.00425244	-0.704473	0.152604			0.250078	0.013567	-0.00157638
-0.014375	0.0275	0.00241384	0.015625	0.00131432			-0.00342385	-0.700928	0.150688			0.253864	0.0170921	-0.0015469
0.038125	-0.0384375	0.00240073	0.015625	0.00133612			-0.00317658	-0.696311	0.148858			0.252797	0.0168963	-0.00162852
0.051875	0.064375	0.00238247	0.0153125	0.0013714			-0.00321942	-0.689575	0.147094			0.249731	0.0179408	-0.00172028
0.0034375	-0.011875	0.00238162	0.016875	0.0013578			-0.00327866	-0.681178	0.145252			0.24975	0.0202256	-0.0017318
-0.0140625	0.008125	0.00236454	0.016875	0.001355			-0.00379045	-0.673325	0.143525			0.245321	0.0170921	-0.00161766
0.0159375	0.0021875	0.00235891	0.015625	0.0013541			-0.0038249	-0.66634	0.141816			0.243089	0.0131753	-0.00158974
-0.01	0.0078125	0.00234836	0.0171875	0.00134728			-0.00263761	-0.659943	0.140139			0.242879	0.017288	-0.00150979
0.0309375	0.0059375	0.00233763	0.0178125	0.00136148			-0.00233006	-0.654663	0.138403			0.243301	0.0223798	-0.00152626
-0.00375	0.0171875	0.00233202	0.019375	0.00134832			-0.00239266	-0.645869	0.136713			0.241894	0.0176144	-0.00143205
-0.00625	0.005625	0.00234587	0.018125	0.00133782			-0.00248911	-0.638296	0.135002			0.242581	0.0161129	-0.00142096
-0.0025	0.035625	0.00235048	0.01875	0.0013237			-0.00265439	-0.632516	0.133368			0.244215	0.0173532	-0.00137863
0.0025	0.0071875	0.0023669	0.01875	0.00130976			-0.0025752	-0.629575	0.13176			0.244013	0.0165699	-0.00128055
-0.0134375	-0.0503125	0.00234375	0.018125	0.00130693			-0.00229152	-0.62656	0.13005			0.245623	0.0157212	-0.00128482
-0.0315625	0.110937	0.00231714	0.01875	0.00132225			-0.0022838	-0.621281	0.128545			0.248785	0.020095	-0.00132717
-0.009375	-0.02	0.00228898	0.0190625	0.0013152			-0.00118261	-0.616413	0.126953			0.254513	0.022641	-0.00139777
0.01375	0.0059375	0.00227273	0.0190625	0.00131262			-0.00192898	-0.612178	0.125464			0.255744	0.0167657	-0.001273
-0.0028125	0.03875	0.00227637	0.0175	0.00129912			-0.00157022	-0.608148	0.123826			0.25564	0.0164393	-0.00112281
0.011875	0.0278125	0.00225622	0.0178125	0.00129486			-0.00112741	-0.60431	0.122282			0.256276	0.0225757	-0.00105903
0.0075	0.02	0.00225851	0.0190625	0.00128628			-0.00128421	-0.600207	0.120771			0.257563	0.0228368	-0.000995262
0.02	-0.008125	0.00224045	0.01875	0.0012903			-0.000736442	-0.59353	0.119284			0.257423	0.0223798	-0.000963924
-0.0090625	0.00125	0.00221543	0.01875	0.00128333			6.07859e-05	-0.585119	0.117853			0.25789	0.0206825	-0.000962539
-0.0303125	0.02375	0.00221135	0.0190625	0.0012977			0.0004487	-0.577604	0.11649			0.256055	0.0211395	-0.000809463
-0.008125	-0.000625	0.00218669	0.0196875	0.00128971			0.00105575	-0.572986	0.115161			0.257615	0.0165699	-0.000853564
0.0146875	-0.0059375	0.00219672	0.0184375	0.00128837			0.000767164	-0.567001	0.113755			0.257861	0.0176144	-0.000874296
-0.0065625	0.003125	0.00219568	0.0203125	0.00127893			0.000264379	-0.561001	0.112327			0.259391	0.024273	-0.000844201
-0.0075	0.0165625	0.00217059	0.0221875	0.00127054			-6.43933e-05	-0.554192	0.110977			0.260185	0.0210089	-0.000924178
0.0125	-0.0003125	0.00216269	0.02125	0.00126726			6.0347e-05	-0.547162	0.10969			0.264997	0.015656	-0.000712969
-0.000625	-0.01	0.00217676	0.020625	0.00125214			0.000232792	-0.542501	0.108299			0.26472	0.0150684	-0.000779015
0.031875	-0.0028125	0.00217722	0.0215625	0.00126846			0.000777102	-0.540824	0.106995			0.263778	0.0188547	-0.000722615
-0.0015625	-0.006875	0.00218205	0.0209375	0.00125427			0.00120614	-0.538104	0.1057			0.261679	0.0181366	-0.000668471
-0.005	0.0121875	0.00215651	0.0196875	0.00124369			0.00169219	-0.533251	0.104422			0.260951	0.020095	-0.000653382
-0.02875	-0.0265625	0.00214472	0.0209375	0.00125699			0.00174432	-0.529148	0.103095			0.258901	0.0219882	-0.000646777
0.0240625	0.0259375	0.00213683	0.0215625	0.00126544			0.00200974	-0.526001	0.101877			0.259257	0.0161129	-0.000595132
0.014375	-0.010625	0.00212185	0.0196875	0.00126409			0.00176857	-0.522736	0.100609			0.258181	0.0151337	-0.000680277
-0.018125	-0.0125	0.0021158	0.02	0.00126652			0.00142034	-0.519	0.0994239			0.258737	0.0202256	-0.000626399
-0.0015625	-0.021875	0.00209014	0.02125	0.00125235			0.00144583	-0.515971	0.0981688			0.257954	0.024273	-0.000640877
0.0096875	-0.0003125	0.00206824	0.0209375	0.00124648			0.0012055	-0.509221	0.096999			0.259777	0.0206173	-0.000707041
-0.0178125	0.0209375	0.00207755	0.02	0.0012488			0.00134217	-0.500691	0.0958081			0.260481	0.0180713	-0.000798835
0.0128125	-0.0178125	0.00207487	0.0203125	0.0012461			0.00140711	-0.494618	0.0945988			0.260701	0.0176144	-0.000403502
0.0025	0.035	0.00206315	0.020625	0.00123312			0.00177754	-0.491971	0.0934157			0.261797	0.0167004	-0.00041634
-0.00875	0.00625	0.00205627	0.019375	0.00122656			0.00173164	-0.48553	0.0923652			0.262817	0.0168963	-0.000394787
0.035	0	0.00204886	0.02125	0.00124632			0.00189871	-0.47925	0.091224			0.266216	0.0199645	-0.000326563
-0.02375	-0.0078125	0.00203215	0.0240625	0.00125459			0.00152886	-0.473206	0.0901632			0.270817	0.0193769	-0.000313126
-0.011875	0.01375	0.00205816	0.021875	0.00125088			0.00149452	-0.466838	0.0890192			0.276241	0.0138281	-0.000497467
-0.0059375	0.02875	0.00207916	0.0215625	0.00124128			0.00181922	-0.464221	0.0878949			0.285141	0.0116739	-0.000364431
-0.005	-0.001875	0.00208083	0.021875	0.00123086			0.00136878	-0.462926	0.0867731			0.286978	0.0163088	-0.000480968
0.00375	0.0128125	0.00207467	0.0225	0.00121932			0.00125408	-0.461544	0.0856903			0.287187	0.0168963	-0.000640921
-0.0046875	0.0034375	0.00207077	0.021875	0.00120886			0.000839905	-0.456221	0.0845893			0.29015	0.0167004	-0.000687635
0.009375	0.0034375	0.00204692	0.0215625	0.00120322			0.000391624	-0.452235	0.0834345			0.293107	0.0161129	-0.000722617
0.0175	0.0096875	0.00202899	0.0215625	0.00120577			0.000701554	-0.450397	0.0824928			0.294517	0.0131753	-0.000639688
0.025625	-0.014375	0.00201129	0.020625	0.00121642			0.000620538	-0.447912	0.0814632			0.293245	0.0125878	-0.000505923
-0.019375	0.015625	0.00212068	0.0203125	0.00122068			0.000675977	-0.445176	0.0804853			0.289215	0.0165699	-0.000505041
0.01375	-0.0140625	0.00213871	0.0215625	0.00121927			0.000744575	-0.440573	0.0795487			0.288423	0.0199645	-0.000422998
0.0296875	-0.0221875	0.00216964	0.0221875	0.00123381			0.000918523	-0.43425	0.078511			0.287999	0.0179408	-0.000353127
0.03125	-0.011875	0.00214769	0.02125	0.00124973			0.00135504	-0.426559	0.0774912			0.289162	0.0108905	-0.000375149
-0.0009375	0.0240625	0.00212258	0.0203125	0.00123515			0.00133517	-0.42172	0.0764913			0.288155	0.0130448	-0.00039949
0.0115625	-0.0271875	0.00211715	0.0215625	0.00123137			0.00162414	-0.418808	0.0755945			0.285961	0.0153948	-0.000350138
-0.00375	0.014375	0.00210616	0.021875	0.00121982			0.00172406	-0.413897	0.0746565			0.286688	0.0155254	-0.000417839
0.0340625	-0.00875	0.00211343	0.0221875	0.00123873			0.00181966	-0.406985	0.0737312			0.286921	0.0150684	-0.000295906
-0.0121875	0.0240625	0.00211374	0.0234375	0.00123553			0.00188252	-0.400941	0.0728532			0.289607	0.0141545	-0.000357798
0.0025	0.0246875	0.00209655	0.0228125	0.00122268			0.00127737	-0.397632	0.0720055			0.292988	0.00978074	-0.000422292
0.021875	0.0196875	0.00207863	0.02125	0.00122937			0.00174407	-0.395529	0.0711665			0.295093	0.00854041	-0.000331163
0.0178125	0.01375	0.00205843	0.02125	0.00123191			0.00119375	-0.395308	0.0703298			0.294665	0.0139587	-0.000276955
0.011875	0.0365625	0.00205349	0.0225	0.00122848			0.000937315	-0.392455	0.0694891			0.293702	0.015199	-9.94605e-05
-0.0025	-0.00625	0.00203579	0.0234375	0.00121572			0.00107347	-0.387896	0.0686064			0.292707	0.0128489	-0.000129041
0.0315625	0.0153125	0.00203519	0.02125	0.00123218			0.000710019	-0.384955	0.0677461			0.296585	0.0108252	-0.00011391
0.0040625	-0.0240625	0.00202928	0.02125	0.00122094			0.000782042	-0.383823	0.0669242			0.299565	0.0116739	-0.000292168
-0.029375	0.028125	0.00204439	0.02	0.00123514			0.000529185	-0.382176	0.066113			0.300068	0.0132406	-0.000355921
-0.0434375	0.0253125	0.00203962	0.02125	0.00126324			2.24303e-05	-0.379132	0.0653309			0.300917	0.0127183	-0.0003499
-0.03625	-0.00875	0.00201928	0.02125	0.0012838			0.000143014	-0.37347	0.0645499			0.303344	0.0152643	-0.00050059
-0.001875	0.0059375	0.00199763	0.0215625	0.00126972			-0.000622906	-0.367411	0.0637326			0.309229	0.0144156	-0.000401746
0.030625	0	0.00198094	0.02125	0.00128458			-0.00081522	-0.36119	0.0629787			0.30953	0.0104335	-0.000550496
0.0096875	0.0015625	0.0019954	0.0203125	0.00127831			-0.00108594	-0.357264	0.0621864			0.31307	0.00899737	-0.000470742
-0.005	0.031875	0.00197124	0.0203125	0.00126743			-0.00131637	-0.353793	0.0614392			0.316189	0.0135017	-0.000463814
-0.0025	0.01	0.00198519	0.0221875	0.00125418			-0.00118531	-0.349661	0.0606841			0.318953	0.0130448	-0.000558629
0.01375	0.014375	0.00196553	0.021875	0.00125235			-0.00147222	-0.342264	0.0599321			0.319195	0.0108252	-0.000513524
0.008125	0.033125	0.00196049	0.0225	0.00124492			-0.00128459	-0.338249	0.0591822			0.317729	0.00945433	-0.000645065
-0.003125	0.0184375	0.00193801	0.021875	0.00123258			-0.00117162	-0.335778	0.0583916			0.316032	0.00788761	-0.000650494
0.0228125	-0.0040625	0.00192768	0.0215625	0.00124008			-0.00130171	-0.333911	0.0577227			0.316102	0.00671256	-0.000860208
-0.0325	0.0215625	0.00191624	0.0209375	0.00125718			-0.00199658	-0.333572	0.057031			0.317217	0.00938905	-0.00096151
0.033125	0.0128125	0.00191837	0.021875	0.00127469			-0.0021926	-0.330675	0.0563862			0.319653	0.0135017	-0.000863683
0.001875	0.00875	0.00191204	0.023125	0.00126073			-0.00197371	-0.327558	0.0558249			0.321905	0.0111516	-0.00078341
-0.0109375	0.0134375	0.00190266	0.0209375	0.001256			-0.00213307	-0.325646	0.0551844			0.323713	0.00462359	-0.000832763
0.0265625	0.005	0.00191247	0.020625	0.00126696			-0.00215194	-0.324337	0.0544768			0.323384	0.00919321	-0.00065718
-0.008125	0.0028125	0.0018984	0.02	0.00125935			-0.00174654	-0.32344	0.0537533			0.322812	0.0118697	-0.000574805
0.0278125	-0.0240625	0.00190919	0.0203125	0.00127152			-0.00199031	-0.319705	0.0530195			0.324031	0.0104988	-0.000409688
0.0125	-0.068125	0.00189578	0.0203125	0.00126822			-0.00265046	-0.314249	0.0523689			0.324743	0.0112169	-0.000517883
0.0259375	0.12125	0.00188474	0.020625	0.00127841			-0.00209881	-0.308322	0.0519681			0.332692	0.0108252	-0.000505442
0.005625	0.02875	0.00186726	0.020625	0.00126815			-0.00205423	-0.303999	0.0514342			0.334816	0.0075612	-0.000569139
0.0178125	0.005625	0.0018625	0.019375	0.00127021			-0.00205791	-0.300249	0.0508798			0.334769	0.00462359	-0.000483966
0.0140625	-0.0215625	0.00188343	0.0203125	0.00126849			-0.00261487	-0.296631	0.0502593			0.33626	0.0118044	-0.000503326
0.0059375	0.025	0.00226847	0.0221875	0.00125867			-0.00301331	-0.292072	0.0495853			0.337961	0.0111516	-0.000456833
0.005	0.00375	0.00243873	0.0215625	0.00124804			-0.00323441	-0.287337	0.0489552			0.345438	0.00645144	-0.000508686
0.0340625	0.0253125	0.00245156	0.0209375	0.0012666			-0.00357359	-0.282087	0.0483836			0.354325	0.00488471	-0.000533443
0.0146875	0.001875	0.00244954	0.02125	0.00126555			-0.00424101	-0.281734	0.0478007			0.364113	0.00566808	-0.000541555
-0.0109375	0.01	0.00244849	0.0215625	0.00126077			-0.00438684	-0.281866	0.0472386			0.369113	0.00534167	-0.000576536
-0.01125	-0.0146875	0.00242214	0.020625	0.00125636			-0.00394445	-0.280543	0.046704			0.37469	0.00736536	-0.000749566
0.008125	-0.00625	0.00241986	0.0215625	0.00124887			-0.00427557	-0.277087	0.0461006			0.375254	0.0106947	-0.00087636
0.0025	-0.0090625	0.00241167	0.021875	0.00123586			-0.00450024	-0.275057	0.0454875			0.376238	0.0062556	-0.00072228
0.0234375	-0.00625	0.00240547	0.02125	0.00124395			-0.00456204	-0.273851	0.044979			0.376472	0.00364439	-0.000767723
0	0.01875	0.00238715	0.0203125	0.00122849			-0.00502171	-0.272204	0.0444498			0.383307	0.00286102	-0.000767478
0.0096875	0.01625	0.00237937	0.020625	0.00122292			-0.00502316	-0.271572	0.0439289			0.384601	0.00997658	-0.000944619
-0.0021875	0.00625	0.00235575	0.020625	0.00120992			-0.00471369	-0.268469	0.0433395			0.386194	0.00932377	-0.00097978
-0.004375	-0.01875	0.00233211	0.020625	0.00119926			-0.00508298	-0.262837	0.0428439			0.385033	0.00723481	-0.000959786
-0.0146875	0.0253125	0.00231908	0.0209375	0.00119905			-0.00443646	-0.257395	0.0423628			0.382579	0.00599448	-0.0010653
-0.0025	0.053125	0.00230027	0.020625	0.00118666			-0.00389802	-0.254704	0.0418383			0.385184	0.00397079	-0.00100508
-0.018125	-0.01625	0.00228388	0.0209375	0.00119004			-0.00392883	-0.251939	0.0413072			0.387148	0.0029263	-0.00096221
-0.01625	-0.0071875	0.00227082	0.0209375	0.00119151			-0.00327895	-0.248587	0.0407637			0.385515	0.00619032	-0.000898867
-0.0228125	-0.01125	0.00226762	0.0228125	0.00119952			-0.00331513	-0.243586	0.0402895			0.381992	0.00821401	-0.000887657
0.0153125	0.000625	0.0022432	0.02375	0.00119993			-0.00261439	-0.239469	0.0398113			0.379231	0.0029263	-0.00104308
0.0003125	0.0215625	0.00223846	0.0215625	0.00118534			-0.00179845	-0.23566	0.0393821			0.381454	-0.00151276	-0.000942682
-0.0175	-0.0171875	0.00223065	0.021875	0.00118811			-0.00138282	-0.236454	0.0388863			0.385534	0.00155542	-0.000919258
-0.006875	-0.0159375	0.00222482	0.023125	0.00118023			-0.00140947	-0.236836	0.0383867			0.385308	0.00155542	-0.000883159
-0.018125	0.0096875	0.00220124	0.0225	0.00118369			-0.00145734	-0.235101	0.037946			0.388436	0.00168598	-0.000803941
0.0075	-0.0371875	0.00223046	0.0228125	0.00117649			-0.00204715	-0.231425	0.0375352			0.392611	0.00233878	-0.00079028
-0.004375	-0.0271875	0.002274	0.024375	0.00116625			-0.00165306	-0.231351	0.0371027			0.400038	0.000315092	-0.000634157
-0.03125	0.001875	0.00229232	0.0225	0.00118301			-0.00141239	-0.231233	0.0366621			0.405128	-0.00131691	-0.00058189
-0.0415625	-0.0034375	0.00227634	0.021875	0.00120988			-0.00179036	-0.230204	0.036146			0.408265	-0.00275308	-0.000568394
-0.00625	0.0196875	0.00227244	0.0228125	0.0012011			-0.00124862	-0.228675	0.0356634			0.411081	0.0032527	-0.000662947
0.0128125	-0.025625	0.00227109	0.0234375	0.00119899			-0.00247593	-0.225557	0.0352802			0.412013	0.00279574	-0.000731949
-0.014375	0.0071875	0.00224631	0.023125	0.00119847			-0.00303155	-0.220175	0.0348223			0.412735	-0.0030142	-0.000764566
0.025625	-0.001875	0.00223247	0.0228125	0.00120921			-0.00284994	-0.215851	0.0344189			0.413209	-0.00471149	-0.000877429
0.0078125	-0.0153125	0.00223442	0.02375	0.001202			-0.00306307	-0.214616	0.0339088			0.418942	-0.00307948	-0.000716333
0.0090625	0.01	0.00225729	0.023125	0.00119613			-0.00231389	-0.212219	0.0334776			0.422755	-0.0030142	-0.00080853
0.02375	0.02375	0.00224207	0.0234375	0.00120502			-0.00271299	-0.207601	0.0330749			0.429746	-0.00386285	-0.000722978
0.0165625	-0.00875	0.00221703	0.025625	0.00120662			-0.00257613	-0.203424	0.0326126			0.439574	-0.00353645	-0.000622409
0.015625	0.0359375	0.00222417	0.02625	0.00120725			-0.0032367	-0.20041	0.0321966			0.439691	-0.00706158	-0.00077101
0.0165625	0.0221875	0.00219686	0.025	0.00120882			-0.0028463	-0.198704	0.0318319			0.442724	-0.0123493	-0.000832446
0.01	-0.00125	0.0021755	0.024375	0.0012038			-0.00318491	-0.199292	0.0314726			0.443079	-0.00934639	-0.00102227
-0.02	0.0225	0.00216004	0.0259375	0.00120885			-0.00357473	-0.200101	0.0311811			0.454084	-0.00653934	-0.00101289
0.016875	-0.008125	0.00213758	0.0259375	0.00121071			-0.0039774	-0.198968	0.0308185			0.454912	-0.00791022	-0.000924803
0.0215625	-0.0065625	0.00214009	0.025	0.00121723			-0.00342004	-0.196498	0.0304427			0.454084	-0.0108478	-0.00106213
-0.01125	0.0128125	0.00214195	0.0253125	0.00121336			-0.00309047	-0.196204	0.0301108			0.453474	-0.0113701	-0.00109401
-0.010625	0.00375	0.00211596	0.025	0.00120891			-0.003149	-0.19713	0.0298172			0.45461	-0.0149605	-0.000837905
0.004375	0.0053125	0.00209655	0.0246875	0.00119827			-0.00306213	-0.196557	0.0293806			0.458835	-0.0148952	-0.000781032
-0.0015625	-0.024375	0.00207082	0.0246875	0.00118495			-0.00274239	-0.194851	0.0290392			0.465186	-0.0117618	-0.000562785
-0.026875	0.0009375	0.0020551	0.025625	0.0011971			-0.00252513	-0.191542	0.0287393			0.471192	-0.0115006	-0.000421676
0.0009375	0.006875	0.00203019	0.0253125	0.00118317			-0.00203121	-0.186836	0.0284102			0.475111	-0.0182898	-0.000373086
0.01625	0.01875	0.00205279	0.024375	0.00118472			-0.00158267	-0.183792	0.0281729			0.478251	-0.0216191	-0.000320431
-0.0196875	0.0096875	0.00204448	0.0259375	0.00118969			-0.00149217	-0.182483	0.027861			0.477221	-0.018094	-0.000158475
-0.01375	0.0121875	0.00205658	0.02625	0.00118866			-0.00183914	-0.180057	0.0274606			0.481578	-0.0182898	-2.34261e-05
0.015	0.0109375	0.00204978	0.02625	0.0011889			-0.00209638	-0.176292	0.0271932			0.485074	-0.0228594	-2.33509e-05
-0.00375	-0.0040625	0.00202994	0.0271875	0.00117788			-0.0023812	-0.172704	0.0268112			0.486577	-0.022533	4.46682e-05
0.0121875	-0.0190625	0.00207598	0.026875	0.00117544			-0.00274484	-0.171012	0.0265419			0.487285	-0.0263193	-7.96864e-06
-0.011875	0.02125	0.00215144	0.02625	0.00117271			-0.00258143	-0.170498	0.0263061			0.490891	-0.0304972	7.80124e-05
-0.0265625	0.0775	0.00216315	0.0259375	0.0011847			-0.00200139	-0.171542	0.0259998			0.497466	-0.0297791	0.000155405
0.0353125	-0.07625	0.00217315	0.026875	0.0012053			-0.00142009	-0.172159	0.0256695			0.495221	-0.0250789	5.31568e-05
-0.010625	0.0465625	0.00217491	0.0275	0.00120095			-0.00104148	-0.171189	0.0253982			0.497359	-0.0284735	-2.08508e-05
0.0071875	-0.08	0.0021582	0.02625	0.00119322			-0.00034205	-0.169439	0.0251361			0.498005	-0.0340223	-0.000162402
-0.0115625	0.015	0.00215327	0.02625	0.00118996			-0.000541695	-0.169748	0.024852			0.499705	-0.0367641	-0.000193017
0.01125	0.01625	0.00215058	0.0253125	0.00118643			-0.000678071	-0.171115	0.0245363			0.501863	-0.0350016	-0.00020043
-0.023125	-0.0484375	0.00214824	0.0253125	0.00119482			-0.000938186	-0.170704	0.0242847			0.502084	-0.0359808	-0.000163665
0.004375	0.0259375	0.00213062	0.025625	0.00118435			-0.000552479	-0.168571	0.023982			0.50508	-0.0355238	-0.000218641
0.015625	0.0253125	0.00212072	0.02625	0.00118526			5.77652e-05	-0.165056	0.023665			0.516398	-0.0359808	-0.000216919
-0.0078125	0.0115625	0.00210781	0.02625	0.00117835			6.29629e-06	-0.160806	0.0233617			0.536371	-0.0421171	-0.000128602
0.0165625	0.005	0.00209006	0.0253125	0.00118028			-8.07058e-05	-0.157998	0.0230466			0.538135	-0.0477312	-4.08624e-05
0.01375	-0.00125	0.00207566	0.0265625	0.00117936			0.000738391	-0.15735	0.0227892			0.539668	-0.04512	-9.7364e-05
-0.0203125	-0.0009375	0.00206738	0.0271875	0.00118503			0.000220571	-0.155645	0.0225618			0.539867	-0.0425741	-0.000102854
0.0078125	0.013125	0.00204951	0.0278125	0.00117812			0.000115516	-0.151821	0.0223518			0.545434	-0.0478618	3.87654e-05
0.0403125	-0.0165625	0.0020253	0.0271875	0.0012038			-0.000164464	-0.148453	0.0221072			0.558273	-0.0526272	8.24519e-06
0.0315625	0.0009375	0.00200577	0.0275	0.0012204			-0.000816515	-0.146644	0.0218002			0.558665	-0.054194	9.48027e-05
0.0078125	0.0234375	0.00199023	0.0271875	0.00121306			-0.00157436	-0.14838	0.0215715			0.563229	-0.0572621	0.000181322
-0.036875	0.00125	0.00197082	0.0259375	0.00123486			-0.00230279	-0.149674	0.0213176			0.570446	-0.0580455	0.000175483
-0.019375	-0.02375	0.00196883	0.02625	0.0012389			-0.00190321	-0.149189	0.0210175			0.571937	-0.055369	0.000224953
-0.008125	0.02	0.00195031	0.0278125	0.00123163			-0.00269373	-0.148483	0.0208199			0.583746	-0.0565441	0.000269142
-0.0065625	0.003125	0.00195359	0.0265625	0.0012229			-0.00319431	-0.147762	0.020565			0.587941	-0.0641166	0.000342604
0.01875	0.0046875	0.00194619	0.0259375	0.00122646			-0.00331851	-0.147997	0.0203073			0.587363	-0.0671847	0.000302085
0.01125	0.01875	0.00197139	0.025	0.00122247			-0.00255462	-0.14885	0.0200454			0.588623	-0.0624846	0.000446454
-0.015	0.0253125	0.00196159	0.026875	0.00122228			-0.00293149	-0.149836	0.0198134			0.59616	-0.0646388	0.000449769
-0.0365625	-0.0059375	0.00194941	0.0259375	0.00124366			-0.00306357	-0.14638	0.0194981			0.59552	-0.0667931	0.000455117
-0.00125	-0.0025	0.00194301	0.0253125	0.00122946			-0.00304779	-0.141718	0.0193102			0.603023	-0.0691431	0.00053742
-0.0025	-0.0090625	0.00192637	0.02625	0.00121669			-0.00286136	-0.13863	0.0191101			0.614757	-0.0712321	0.000607032
0.00625	0.0078125	0.00192213	0.0253125	0.00120783			-0.00132666	-0.136997	0.0189094			0.617945	-0.0780213	0.00066307
-0.00625	0.0003125	0.00190419	0.025	0.00119907			-0.000684477	-0.13538	0.0186959			0.618804	-0.0766504	0.000766649
0.0125	-0.0078125	0.00188116	0.0265625	0.00119668			-0.000699025	-0.133306	0.0184455			0.619301	-0.0739739	0.000589641
0.011875	0.0084375	0.00185904	0.0278125	0.00119369			-0.00111049	-0.13038	0.0182108			0.622597	-0.0785435	0.000653676
0.0009375	0.0078125	0.00186345	0.026875	0.0011798			-0.000751115	-0.12713	0.0180031			0.63158	-0.0839618	0.000773709
-0.010625	0.0178125	0.00186874	0.02625	0.00117577			-0.000960303	-0.126203	0.0177851			0.641094	-0.0875522	0.000858538
0.0021875	0.0134375	0.00186271	0.0265625	0.00116335			-0.0016394	-0.128483	0.0175331			0.643607	-0.0873564	0.0009086
0.006875	-0.0015625	0.00184395	0.0259375	0.00115577			-0.00152281	-0.130144	0.0173537			0.65552	-0.0874869	0.000997977
0.0096875	0.02625	0.00183729	0.0253125	0.0011511			-0.00199021	-0.128762	0.0171467			0.668549	-0.0885967	0.00113215
0.011875	0.0009375	0.00182353	0.0271875	0.00114868			-0.00113663	-0.1276	0.0169345			0.674615	-0.0880092	0.00134841
0.0203125	-0.02	0.00181213	0.0265625	0.00115472			-0.0012556	-0.127541	0.0168082			0.683974	-0.0942761	0.00130188
-0.0175	0.010625	0.00183306	0.0240625	0.00115788			-0.00120611	-0.127644	0.016584			0.688696	-0.098454	0.00139623
-0.01	0.036875	0.00185497	0.0246875	0.00115349			-0.00115722	-0.129247	0.0163847			0.694669	-0.0940149	0.00133251
-0.0153125	-0.0315625	0.0020113	0.0259375	0.00115448			-0.00127517	-0.129277	0.016166			0.697551	-0.0927746	0.00128643
0.0290625	0.068125	0.00205101	0.025	0.0011692			-0.000518969	-0.12488	0.0160086			0.70891	-0.0987804	0.00125779
0.000625	0.0453125	0.00207928	0.0246875	0.0011553			-0.000694867	-0.119938	0.0158887			0.713146	-0.103938	0.00132494
0.0125	0.015	0.00210814	0.025625	0.00115345			-0.00128569	-0.117247	0.0157088			0.717762	-0.104133	0.00128077
0.0121875	0.0003125	0.00242257	0.0240625	0.00115131			-0.00116195	-0.11785	0.0154666			0.724839	-0.108507	0.00145396
-0.020625	0.0275	0.00255592	0.0246875	0.00115763			-0.000877348	-0.114997	0.0153972			0.740184	-0.109943	0.0014069
0.0290625	-0.0234375	0.00258042	0.025625	0.00117231			-0.00190687	-0.111644	0.0152675			0.74701	-0.108377	0.00151835
-0.00125	0.0115625	0.00258524	0.0275	0.001159			-0.00237643	-0.109821	0.015118			0.763586	-0.110988	0.00173034
0.00125	0.028125	0.00256312	0.0259375	0.00114585			-0.00198056	-0.107674	0.0150447			0.766197	-0.11843	0.00183985
-0.0028125	-0.014375	0.0025341	0.025	0.00113443			-0.00243305	-0.107129	0.0148106			0.773451	-0.121172	0.0019786
0.015625	0.0109375	0.00251106	0.025	0.00113596			-0.00285145	-0.108924	0.0146764			0.790655	-0.11732	0.00205598
0.03125	0.003125	0.00251205	0.0259375	0.0011531			-0.00395726	-0.110144	0.0145237			0.810337	-0.11967	0.00220916
0.0178125	-0.004375	0.00248085	0.0253125	0.00115659			-0.00366565	-0.108644	0.014336			0.821054	-0.122151	0.00221159
0.0325	-0.0084375	0.00245909	0.025625	0.00117472			-0.00372551	-0.10785	0.0141931			0.82764	-0.123913	0.00221839
-0.028125	0.01	0.00243323	0.025625	0.00118826			-0.00483277	-0.108791	0.014034			0.834811	-0.127112	0.00218595
0.0265625	0.0034375	0.00240332	0.02375	0.00120006			-0.00409855	-0.109821	0.0138205			0.849347	-0.130964	0.00215469
0.01	0.0296875	0.00239659	0.0234375	0.00119515			-0.00460785	-0.109512	0.013648			0.872697	-0.129593	0.00210852
-0.0084375	0.0140625	0.00236775	0.0240625	0.00118874			-0.00400802	-0.108821	0.0135172			0.894524	-0.126394	0.0021415
0.000625	0.003125	0.00236115	0.0240625	0.0011746			-0.00388508	-0.104791	0.0132992			0.89905	-0.13129	0.00213491
0.015	0.0065625	0.00236807	0.024375	0.00117501			-0.00269495	-0.100556	0.0131317			0.90863	-0.139581	0.00218675
-0.0046875	-0.0075	0.00235334	0.0240625	0.0011651			-0.00230436	-0.098747	0.0129306			0.915922	-0.139842	0.00233934
0.00625	0.0275	0.00234567	0.0234375	0.00115688			-0.00195324	-0.0987618	0.0127236			0.927865	-0.139319	0.0022136
0.01125	0.03	0.00234247	0.02375	0.00115376			-0.00180658	-0.096247	0.0126172			0.936674	-0.143106	0.00213298
-0.0128125	-0.011875	0.00232712	0.0246875	0.00115224			-0.0026514	-0.0933058	0.0124979			0.9404	-0.143759	0.00224916
0.0034375	0.0528125	0.00233322	0.02625	0.00114136			-0.00266999	-0.0908352	0.0123614			0.94495	-0.146109	0.00229439
0.004375	0.098125	0.00233704	0.025	0.00113156			-0.00331785	-0.089997	0.0122873			0.953513	-0.15107	0.00220655
-0.0103125	-0.025	0.00233333	0.02375	0.00112781			-0.00336202	-0.0902764	0.0121489			0.96846	-0.15564	0.0022186
0.004375	0.08875	0.00232872	0.0246875	0.00111818			-0.00330251	-0.0919088	0.0120179			0.988643	-0.151462	0.00231453
0.0134375	-0.024375	0.00230885	0.0246875	0.00111773			-0.00334225	-0.0924823	0.0119061			0.998241	-0.151527	0.00242015
0.016875	0.018125	0.00231173	0.025	0.00112072			-0.00362545	-0.0912764	0.011781			1.00578	-0.156162	0.00239195
-0.025625	-0.0071875	0.00231114	0.024375	0.00113242			-0.00399209	-0.0905411	0.0116471			1.00654	-0.159883	0.0025145
0.009375	-0.0128125	0.00229649	0.0246875	0.00112773			-0.00332065	-0.0920411	0.0114786			1.0076	-0.159752	0.00249291
-0.015	0.0234375	0.00228734	0.023125	0.00112872			-0.00369262	-0.0934529	0.011331			1.01453	-0.163082	0.00248143
0.009375	-0.019375	0.00227111	0.023125	0.00112407			-0.00341276	-0.0931147	0.0111384			1.0235	-0.161776	0.00261248
-0.0015625	0.0196875	0.00225103	0.0240625	0.00111167			-0.00318794	-0.0909087	0.0109884			1.02842	-0.162102	0.00248385
-0.02625	-0.0059375	0.0022265	0.025	0.00112411			-0.00236334	-0.0877911	0.0108634			1.03271	-0.166411	0.00242996
0.03375	0.0096875	0.00222634	0.0240625	0.0011439			-0.0014651	-0.0843793	0.0107304			1.04724	-0.173722	0.0024478
0.0196875	0.0015625	0.0022165	0.023125	0.00114938			-0.000585713	-0.0829381	0.0106752			1.05741	-0.173592	0.00241769
0.008125	-0.0225	0.00221209	0.0240625	0.00114322			-0.00026672	-0.081791	0.0104847			1.07647	-0.170523	0.00241104
0.0059375	0.0153125	0.00218805	0.0253125	0.00113496			-0.000174865	-0.0799675	0.0103926			1.08934	-0.174832	0.00236117
-0.0153125	0.00375	0.00216462	0.025	0.00113617			-7.33799e-05	-0.0771439	0.0103549			1.1068	-0.178161	0.00233784
-0.0028125	-0.009375	0.00216804	0.02625	0.00112487			-0.000243271	-0.0750557	0.0102181			1.12697	-0.179271	0.00257103
-0.0521875	0.0128125	0.00215924	0.0259375	0.00116309			0.000212295	-0.0739086	0.0100295			1.14282	-0.18358	0.00252072
0.0065625	-0.0159375	0.00213741	0.025625	0.0011552			0.000850747	-0.076041	0.00989841			1.15777	-0.186844	0.002588
-0.0246875	0.011875	0.00211149	0.025	0.00116554			0.00106648	-0.0773057	0.00978894			1.17363	-0.185407	0.00267934
-0.0159375	-0.0009375	0.00210088	0.0265625	0.001167			0.00162429	-0.0774086	0.00968282			1.18981	-0.183057	0.00276098
0.0246875	0.0009375	0.00208166	0.0265625	0.00117719			0.00230984	-0.0768204	0.00961774			1.21131	-0.188737	0.00280141
0.02625	0.0075	0.00207518	0.0259375	0.00118881			0.00214729	-0.0776145	0.00954266			1.23014	-0.193894	0.00291525
-0.003125	0.016875	0.00205096	0.025625	0.00117717			0.00209756	-0.0788057	0.00948149			1.24256	-0.192458	0.00294392
-0.0115625	0.011875	0.00203111	0.0259375	0.00117411			0.00167753	-0.079541	0.00936178			1.26148	-0.192458	0.00305443
-0.0165625	0.0440625	0.00203869	0.0259375	0.00117609			0.00160132	-0.0793204	0.00925745			1.26654	-0.194155	0.00308396
0.0065625	-0.0096875	0.00203086	0.025625	0.00116804			0.00188929	-0.0759233	0.00914029			1.27495	-0.195069	0.00314787
-0.01625	0.0021875	0.00201501	0.02625	0.00116978			0.00229683	-0.0730851	0.00899187			1.29894	-0.198072	0.0032032
0.0146875	0.0059375	0.00202373	0.0265625	0.00116994			0.00300866	-0.0712909	0.00882648			1.30968	-0.203425	0.00329831
0.0203125	0.0321875	0.00201859	0.025	0.00117572			0.0022664	-0.0709527	0.00874814			1.3256	-0.206428	0.00316999
0.016875	0.00875	0.00201414	0.0265625	0.00117799			0.00271435	-0.069585	0.00865889			1.33237	-0.201858	0.00328884
-0.0009375	0.02625	0.00200193	0.0278125	0.00116429			0.001681	-0.067688	0.00857878			1.35131	-0.20584	0.00326281
-0.016875	-0.0084375	0.00200519	0.0275	0.0011667			0.000883663	-0.0638644	0.00854541			1.36759	-0.210018	0.00328249
0.051875	0.00875	0.00198091	0.0271875	0.00120409			0.000482554	-0.0625556	0.00845707			1.38147	-0.214849	0.00334134
-0.0009375	0.000625	0.00196442	0.0278125	0.00119007			-5.15069e-06	-0.0642615	0.00831182			1.4128	-0.216742	0.0034171
-0.0096875	0.0009375	0.00197565	0.028125	0.00118497			-0.000585301	-0.0666586	0.00823275			1.42855	-0.217395	0.00335602
0.0025	0.0134375	0.00196548	0.0271875	0.00117275			-0.00022014	-0.067085	0.00814538			1.43237	-0.217264	0.00345804
-0.0034375	-0.0096875	0.00196669	0.028125	0.00116162			-0.000835332	-0.0666438	0.00801101			1.44119	-0.215828	0.00367965
0.0053125	-0.0075	0.00194288	0.029375	0.0011525			-0.00082107	-0.0672909	0.00795092			1.45402	-0.220202	0.00370063
0.0059375	0.03875	0.00192	0.0275	0.00114412			-0.000312918	-0.0687909	0.0078431			1.45843	-0.226926	0.00364693
-0.045	-0.0075	0.0019374	0.0265625	0.00117491			0.000275883	-0.069835	0.00771394			1.47243	-0.226012	0.00375156
-0.02125	-0.0309375	0.00192552	0.0275	0.00118157			0.000741161	-0.0708645	0.00767414			1.47587	-0.223988	0.00370111
0.0109375	0.0159375	0.0019091	0.0284375	0.00117783			0.000752773	-0.070188	0.00761731			1.50085	-0.22562	0.00395678
0.01875	0.0165625	0.00191507	0.0271875	0.00118194			0.00157845	-0.0656585	0.00758209			1.51215	-0.229406	0.00402852
-0.0075	0.00375	0.00189785	0.0275	0.00117476			0.000794694	-0.0637615	0.00746968			1.53613	-0.232083	0.00410533
-0.014375	0.015	0.00188614	0.028125	0.00117454			0.000734075	-0.0637026	0.00734726			1.54638	-0.236587	0.00430048
0.0309375	0.001875	0.00187553	0.0275	0.00119089			0.000172442	-0.062232	0.00721825			1.5623	-0.240635	0.00440011
0.00125	-0.0075	0.0018641	0.0275	0.00117735			0.000770602	-0.0607614	0.00717847			1.57348	-0.237566	0.00449643
0.0303125	0.01875	0.00186439	0.0290625	0.00119303			0.000502492	-0.0580408	0.00708632			1.58769	-0.237109	0.00462189
0.05375	-0.02875	0.00187498	0.029375	0.00123196			0.000704846	-0.0565114	0.00694103			1.59752	-0.245139	0.0048044
-0.021875	0.023125	0.00188418	0.0278125	0.00123854			0.000507586	-0.0553055	0.00681426			1.61434	-0.251406	0.00478548
-0.01375	-0.0078125	0.00186297	0.0278125	0.0012369			-0.000135116	-0.0576144	0.00671682			1.63061	-0.249447	0.00485781
0.036875	0.0115625	0.0018542	0.0290625	0.00125841			-0.0010338	-0.0599085	0.00665891			1.6395	-0.249317	0.00511441
0.0009375	0.0275	0.00183523	0.0284375	0.00124372			-0.00162195	-0.0604967	0.0066054			1.66581	-0.252124	0.00522831
-0.0175	-0.02	0.00182181	0.0278125	0.00124577			-0.00182339	-0.0601291	0.00652007			1.69323	-0.251732	0.00522902
0.005625	0.02	0.00181699	0.029375	0.00123592			-0.0017453	-0.061482	0.00646034			1.71039	-0.255061	0.00522349
0.013125	-0.006875	0.00180192	0.0275	0.00123369			-0.00197523	-0.0626144	0.00642612			1.71444	-0.260414	0.00508811
-0.0125	0.013125	0.0017911	0.026875	0.00123086			-0.00223077	-0.0637026	0.00640471			1.7141	-0.262177	0.00511856
0.0178125	-0.0034375	0.00184885	0.026875	0.00123339			-0.0021176	-0.0645556	0.00643556			1.72115	-0.257216	0.00526301
-0.01	0.129375	0.00186213	0.028125	0.00122806			-0.00194734	-0.0632026	0.00635935			1.73736	-0.25937	0.00521764
-0.004375	0.048125	0.00184368	0.028125	0.00121718			-0.00299897	-0.059335	0.00630565			1.74565	-0.267399	0.00521329
0.00875	0.0203125	0.00183203	0.0271875	0.00121081			-0.00295764	-0.0568938	0.00624879			1.74518	-0.269488	0.00522638
0.02625	-0.01	0.0018149	0.0271875	0.00122202			-0.00357114	-0.0568496	0.00616538			1.75841	-0.268901	0.00535366
0.004375	0.0153125	0.00180892	0.0275	0.00121122			-0.0038338	-0.056732	0.00608691			1.7754	-0.272426	0.00542257
-0.01625	0.02125	0.00182238	0.028125	0.00121242			-0.0042725	-0.0539673	0.00597852			1.77452	-0.272883	0.00553367
0.018125	0.02125	0.00180756	0.029375	0.00121549			-0.00360219	-0.0510702	0.00601327			1.77444	-0.272295	0.00543152
-0.0075	0.00875	0.0018401	0.0290625	0.00120789			-0.00362359	-0.0495702	0.00601183			1.78433	-0.278823	0.00541985
0.0065625	-0.016875	0.00187506	0.0284375	0.00119944			-0.00268691	-0.0495261	0.00593274			1.7929	-0.284829	0.00535905
-0.0359375	-0.0665625	0.0019002	0.028125	0.00122048			-0.00246187	-0.0526731	0.00586886			1.79179	-0.283263	0.00530471
-0.0084375	-0.12	0.00188285	0.0290625	0.00121376			-0.00257669	-0.0552173	0.00578952			1.79734	-0.280717	0.00525027
0.0096875	0.095625	0.00189227	0.0284375	0.00120837			-0.00217448	-0.054232	0.00575721			1.80259	-0.284111	0.00519106
-0.0184375	-0.0353125	0.0019372	0.0275	0.0012118			-0.00193965	-0.0535408	0.00565309			1.81211	-0.286918	0.00509861
0.0028125	0.0134375	0.00218845	0.0284375	0.00119955			-0.00123521	-0.0557908	0.00565046			1.82569	-0.288028	0.00578453
-0.0071875	-0.005	0.00231439	0.0275	0.00119184			-0.0019009	-0.0573349	0.00562565			1.82673	-0.290378	0.00603843
0.000625	-0.0140625	0.00235783	0.02625	0.00117766			-0.0018103	-0.0584673	0.00553024			1.83717	-0.294034	0.00617845
-0.01375	-0.0090625	0.00234791	0.026875	0.00117678			-0.00219102	-0.0588644	0.00550255			1.84703	-0.288746	0.00665127
-0.008125	0.0109375	0.00235844	0.0275	0.00117029			-0.00165585	-0.0561143	0.00546066			1.85088	-0.290509	0.00753625
-0.00625	0.00375	0.0023432	0.0271875	0.001162			-0.001262	-0.0520555	0.00532932			1.85739	-0.298081	0.00808323
0.0028125	-0.0178125	0.00232316	0.02625	0.00115038			-0.00115778	-0.0508202	0.00523489			1.85053	-0.300366	0.00866438
0.0175	0.0125	0.00229492	0.0271875	0.00115359			-0.000754729	-0.0506437	0.0051375			1.84611	-0.29906	0.0103254
0.0065625	0.019375	0.00227141	0.0271875	0.00114582			-0.0016534	-0.0499084	0.00512876			1.84019	-0.298799	0.0105608
0.0075	0.0078125	0.00224632	0.028125	0.00113909			-0.00188601	-0.0475407	0.00507229			1.83812	-0.302063	0.0113121
0.0178125	0.02125	0.00222311	0.0290625	0.00114275			-0.00147083	-0.0446731	0.00499491			1.84257	-0.301933	0.0121937
0.0115625	-0.0321875	0.00221205	0.0284375	0.00114012			-0.00155488	-0.0440407	0.00494863			1.86029	-0.305915	0.0129912
0.0146875	-0.00875	0.00220457	0.0275	0.00114064			-0.00267577	-0.0445996	0.0048017			1.8803	-0.310876	0.0148951
-0.045	0.0015625	0.00220875	0.0271875	0.00117147			-0.00295725	-0.0467319	0.00475396			1.89728	-0.30833	0.0154889
-0.009375	0.0209375	0.00220225	0.0278125	0.0011663			-0.00218015	-0.0490996	0.004673			1.92106	-0.304805	0.0166199
0.0128125	0.005625	0.00220677	0.028125	0.00116462			-0.00203605	-0.0475849	0.00462096			1.93477	-0.306894	0.0168826
0.011875	-0.02625	0.00222529	0.0275	0.00116203			-0.00208075	-0.0476143	0.0046336			1.9358	-0.312051	0.0186138
-0.008125	0.107188	0.0022014	0.0265625	0.00115572			-0.0020841	-0.0491437	0.00460648			1.93914	-0.312247	0.0191725
-0.048125	-0.07875	0.00218999	0.025625	0.00118949			-0.00238986	-0.0514525	0.00455036			1.93325	-0.31068	0.0208039
-0.010625	0.015	0.00218779	0.0259375	0.00118533			-0.000917956	-0.051982	0.00455278			1.92461	-0.313879	0.0214618
-0.0521875	-0.0053125	0.00216499	0.0253125	0.0012228			-0.000517114	-0.0510996	0.00449826			1.93867	-0.310093	0.02403
0.014375	0.0478125	0.0021409	0.026875	0.00122198			-0.000778458	-0.0488643	0.00441989			1.94576	-0.30957	0.025587
0.03375	-0.0378125	0.002149	0.0265625	0.00124055			-0.000961914	-0.0450996	0.00436755			1.95272	-0.315903	0.0273397
0.01	0.0278125	0.00213511	0.0253125	0.00123514			-0.000936841	-0.0433201	0.00434957			1.96312	-0.320864	0.0289386
-0.029375	0.0146875	0.00212609	0.025625	0.00124917			9.83641e-05	-0.0435701	0.00433807			1.97265	-0.315968	0.0300524
-0.003125	0.0171875	0.00213343	0.02625	0.00123678			2.17654e-05	-0.0423201	0.00423504			1.98571	-0.312573	0.0343062
0.0034375	0.0153125	0.00212818	0.0275	0.00122486			0.00033629	-0.0394525	0.00419587			1.99032	-0.319232	0.0372628
0.0221875	0.003125	0.00210674	0.0271875	0.00123183			-2.87794e-05	-0.0361877	0.00414982			1.9848	-0.319428	0.0399448
-0.0025	-0.0146875	0.00209901	0.0265625	0.00121903			-0.000121498	-0.0363054	0.00416084			1.98176	-0.31884	0.0430025
-0.0090625	0.0378125	0.00208606	0.0265625	0.00121295			-0.000136113	-0.0375848	0.00409933			1.97507	-0.321321	0.0459102
-0.0128125	0.0378125	0.00209265	0.025625	0.00121069			-0.000598434	-0.0404672	0.00404367			1.97155	-0.320929	0.0498279
0.00375	0.018125	0.00207821	0.025625	0.0011994			-0.000511693	-0.0405113	0.00399285			1.96728	-0.316033	0.0512424
-0.00875	0.009375	0.00206177	0.0275	0.00119325			-0.00121345	-0.040276	0.00401431			1.97673	-0.316621	0.0541686
-0.0003125	0.0025	0.00206335	0.0259375	0.00117874			-0.000982857	-0.040276	0.00396654			1.98224	-0.321386	0.057151
0.018125	-0.0134375	0.00206615	0.0246875	0.00118222			-0.00110605	-0.0417319	0.00397901			1.97429	-0.321386	0.061314
-0.0125	-0.01625	0.00204361	0.024375	0.00118004			-0.00126004	-0.0436878	0.00391311			1.97126	-0.315642	0.0656
0.004375	0.01375	0.00203354	0.0253125	0.00116975			-0.0011012	-0.044026	0.00385106			1.9671	-0.315446	0.071118
0.0015625	-0.0284375	0.00203203	0.025	0.00115679			-0.00140532	-0.0420113	0.00378639			1.96862	-0.316555	0.0731279
-0.0240625	-0.0146875	0.00201991	0.0253125	0.00116648			-0.000900682	-0.0388054	0.00376435			1.97069	-0.315185	0.0791748
-0.001875	0.0209375	0.00199544	0.025	0.00115386			-3.36964e-05	-0.0362612	0.00383969			1.96068	-0.315968	0.0823381
0.0071875	0.008125	0.00199534	0.0240625	0.00114672			-0.000143282	-0.0353936	0.00375448			1.95985	-0.317731	0.088442
-0.0084375	0.01875	0.00197681	0.024375	0.00114091			-0.000114532	-0.0345112	0.00369692			1.95231	-0.313226	0.0923645
0.030625	0.0159375	0.001956	0.0253125	0.00115736			-4.76546e-05	-0.0333053	0.00363428			1.94464	-0.307677	0.0962734
0	-0.015625	0.00195514	0.0271875	0.00114299			-0.000248649	-0.0307465	0.00352078			1.94816	-0.31055	0.101953
0.001875	-0.01125	0.00193117	0.0259375	0.00113066			-1.46492e-05	-0.0280259	0.00349638			1.94735	-0.313683	0.109106
0.0028125	-0.003125	0.00192155	0.025625	0.00111943			-0.000279932	-0.0284818	0.00347292			1.94377	-0.311072	0.115789
-0.015	0.0121875	0.00205674	0.0259375	0.00112052			-0.000696599	-0.0309083	0.00341675			1.93536	-0.307155	0.121841
0.0184375	0.0003125	0.00206932	0.0259375	0.00112504			-0.00120352	-0.0328936	0.0033885			1.93777	-0.306306	0.129481
-0.01375	0.010625	0.00207612	0.025	0.00112482			-0.000458206	-0.0330112	0.00337573			1.93281	-0.300954	0.133016
-0.0003125	0.0565625	0.0020822	0.0265625	0.00111116			-0.00131747	-0.03257	0.00332059			1.9246	-0.299648	0.14086
-0.0075	-0.003125	0.00207133	0.02625	0.00110485			-0.00117716	-0.0342906	0.00328553			1.91872	-0.301606	0.149515
0.01875	-0.0021875	0.00204748	0.0240625	0.00110988			-0.00179432	-0.0350406	0.00316275			1.91777	-0.299387	0.157793
0.0375	0.0040625	0.00206267	0.02375	0.00113359			-0.00153188	-0.0363789	0.00317323			1.91423	-0.291488	0.162315
0.004375	0.01375	0.00205517	0.0253125	0.00112388			-0.00177524	-0.037026	0.00313351			1.91247	-0.287571	0.167769
0.0103125	0.02	0.00203339	0.025625	0.00112024			-0.00133296	-0.0342318	0.00307537			1.90448	-0.288093	0.170629
-0.0071875	-0.0121875	0.00202313	0.025	0.00111351			-0.0012294	-0.0300406	0.00301887			1.89384	-0.286984	0.178849
-0.016875	0.0140625	0.0020155	0.0253125	0.00111655			-0.00126719	-0.0292612	0.00301549			1.89215	-0.283393	0.18842
0.0134375	0.01375	0.0020164	0.025625	0.00111612			-0.00102285	-0.02932	0.00296196			1.8891	-0.282283	0.196858
0.0228125	0.015625	0.00200729	0.025	0.00112507			-0.000827715	-0.0278347	0.00291599			1.88013	-0.278236	0.203935
0.0015625	0.01375	0.00199048	0.0271875	0.00111265			-0.000404133	-0.0259965	0.00276759			1.87597	-0.270272	0.216545
-0.0146875	0.0096875	0.00202388	0.028125	0.00111352			-0.00109168	-0.0237906	0.00265323			1.87699	-0.268966	0.225254
0.0115625	0.0190625	0.00210093	0.0265625	0.00111125			-0.00049013	-0.0213347	0.00262348			1.86947	-0.270206	0.236652
0.0025	0.0275	0.00217045	0.0259375	0.00109994			-0.000957289	-0.0231729	0.00266637			1.8629	-0.26518	0.247906
0.0275	0.0275	0.00217255	0.0271875	0.00111378			-0.00135015	-0.025717	0.0026149			1.85145	-0.256432	0.258103
0.01875	-0.0884375	0.00215213	0.0275	0.0011187			-0.0014988	-0.0277318	0.0026045			1.8508	-0.251993	0.270719
-0.0071875	0.0475	0.00212602	0.0271875	0.00111199			-0.00218045	-0.0265994	0.00260877			1.85108	-0.247293	0.280152
-0.00375	-0.045	0.00210617	0.028125	0.00110192			-0.00251579	-0.0272318	0.00260674			1.85198	-0.243703	0.287106
0.008125	0.015625	0.00208657	0.0278125	0.00109636			-0.00259763	-0.0287024	0.00257587			1.84924	-0.238872	0.297486
0.00125	0.0190625	0.00206128	0.0271875	0.00108399			-0.00237292	-0.0296583	0.00256087			1.84053	-0.235086	0.303611
0.0303125	0.0190625	0.00205192	0.025625	0.00110084			-0.0023234	-0.0315112	0.00262913			1.83	-0.225685	0.314877
-0.0071875	0.0103125	0.00203487	0.0278125	0.00109435			-0.00231451	-0.030173	0.00262194			1.81779	-0.217786	0.320971
-0.0021875	-0.0290625	0.00204084	0.0278125	0.00108294			-0.00283519	-0.0280112	0.0026309			1.80475	-0.215567	0.329578
-0.0309375	0.00125	0.0020158	0.0271875	0.00110043			-0.00229048	-0.0244082	0.00258624			1.79836	-0.213413	0.338589
-0.018125	-0.0034375	0.0019942	0.0271875	0.00110488			-0.00263368	-0.0236876	0.00255277			1.78514	-0.205187	0.350764
0.0165625	-0.0196875	0.00198224	0.0271875	0.00110772			-0.00319888	-0.0246582	0.00240573			1.77309	-0.196831	0.362543
0.0146875	0.0015625	0.00199574	0.0278125	0.00110865			-0.00375025	-0.0232611	0.0024901			1.76173	-0.192131	0.372268
-0.0046875	0.0178125	0.0019997	0.02875	0.00109956			-0.00437008	-0.0207023	0.00261246			1.7482	-0.18247	0.383475
0.0028125	-0.013125	0.00200736	0.0303125	0.00108872			-0.00355465	-0.0185258	0.00263252			1.73247	-0.175354	0.391025
0.01125	0.0071875	0.00199742	0.029375	0.00108644			-0.00307641	-0.0180699	0.00266641			1.71616	-0.173722	0.404351
0.0434375	0.00625	0.0019848	0.0284375	0.00111638			-0.00295043	-0.0205405	0.00269159			1.69749	-0.167064	0.417363
-0.01125	-0.013125	0.00196514	0.02875	0.00111377			-0.00319771	-0.0226288	0.00280175			1.67842	-0.154138	0.425034
-0.008125	0.018125	0.00194886	0.0296875	0.00110806			-0.00341498	-0.0241435	0.00272079			1.66168	-0.143432	0.439163
-0.0096875	-0.0059375	0.00195152	0.029375	0.00110398			-0.00363418	-0.0236141	0.00297857			1.64737	-0.139254	0.454786
-0.0171875	0.0321875	0.00193134	0.02875	0.00110745			-0.00355436	-0.0244964	0.0029626			1.6353	-0.131029	0.465161
0.018125	-0.000625	0.00191766	0.0284375	0.00111182			-0.00371641	-0.0263347	0.00299701			1.62657	-0.121302	0.474559
-0.0003125	0.01375	0.00190353	0.0278125	0.00109832			-0.00428355	-0.0282318	0.00299354			1.6143	-0.114382	0.48823
0.0328125	-0.0084375	0.00188801	0.028125	0.00111749			-0.00444578	-0.0294377	0.00293824			1.60405	-0.103285	0.496844
-0.036875	-0.01	0.00186737	0.02875	0.00114048			-0.0042466	-0.0280112	0.00298306			1.59361	-0.0897064	0.512401
-0.011875	0.0128125	0.00185417	0.0290625	0.00113819			-0.00453166	-0.024967	0.0029741			1.58522	-0.0835701	0.519478
0.0303125	-0.0271875	0.00188864	0.02875	0.00115437			-0.003568	-0.02232	0.00303869			1.57472	-0.0798491	0.538806
0.01	0.0015625	0.00197674	0.0278125	0.00115003			-0.00387918	-0.0225994	0.00312081			1.56581	-0.0683598	0.558904
0.0228125	-0.010625	0.00196437	0.02875	0.00115855			-0.00398102	-0.02282	0.00312773			1.55104	-0.0538023	0.570244
0.015	0.0078125	0.00200028	0.0296875	0.00115916			-0.00296033	-0.0214964	0.00313689			1.54224	-0.0460992	0.583823
0.021875	0.0184375	0.00198793	0.03	0.00116664			-0.00354764	-0.018614	0.00308852			1.52884	-0.0358502	0.5931
0.005	0.0065625	0.00196668	0.030625	0.00115714			-0.00336424	-0.0170405	0.00307211			1.51965	-0.0250789	0.599754
-0.025625	0.0053125	0.00195443	0.0290625	0.00116839			-0.00308076	-0.0176876	0.00317638			1.50721	-0.0182245	0.616275
-0.021875	0.028125	0.00193391	0.029375	0.00117576			-0.00327486	-0.0202905	0.00329436			1.49107	-0.00771439	0.634383
0.0040625	0.0090625	0.00193738	0.02875	0.00116521			-0.00305329	-0.0224964	0.00340737			1.47531	0.0102377	0.652714
0.0025	0.023125	0.001918	0.03	0.00115324			-0.003494	-0.0234964	0.00335248			1.45576	0.0232938	0.662404
0.0025	0.006875	0.00193949	0.029375	0.00114141			-0.00333127	-0.0226876	0.00339034			1.43965	0.0327594	0.674112
0.0115625	-0.0115625	0.00194696	0.0290625	0.0011388			-0.00335834	-0.0238788	0.00347552			1.42917	0.0407889	0.687751
0.0090625	0.0109375	0.00194684	0.02875	0.00113371			-0.00398149	-0.0261435	0.00353686			1.41601	0.0563256	0.708789
0.00875	-0.00125	0.0019364	0.0290625	0.00112838			-0.00381194	-0.0280259	0.00353703			1.40161	0.0697733	0.720294
0.0084375	-0.003125	0.00191797	0.0284375	0.0011228			-0.00314812	-0.0287465	0.0035681			1.3916	0.0828947	0.738055
0.0234375	-0.019375	0.00190759	0.02875	0.00113229			-0.00265801	-0.02532	0.00367865			1.38212	0.0975827	0.755127
0.0225	0.015	0.00191014	0.02875	0.00114072			-0.00283889	-0.0226141	0.00373886			1.37044	0.109398	0.773091
0.0059375	-0.009375	0.00188766	0.0290625	0.00113249			-0.00366166	-0.0211729	0.00374955			1.35905	0.118211	0.784445
0.016875	0.0115625	0.0018714	0.028125	0.0011353			-0.00339988	-0.020967	0.00387198			1.35638	0.130549	0.797384
0.029375	0.0028125	0.00186253	0.02875	0.00115057			-0.00291741	-0.0209082	0.00402181			1.3502	0.152353	0.813896
-0.0246875	-0.00125	0.00184314	0.03	0.00116097			-0.0038177	-0.0188935	0.00403038			1.33732	0.165344	0.830696
0.0278125	-0.0003125	0.00182681	0.03	0.00117436			-0.00404728	-0.0157464	0.0040971			1.32411	0.175723	0.847266
-0.0096875	-0.000625	0.00187599	0.03	0.00116946			-0.00419397	-0.0149817	0.00408978			1.30956	0.18904	0.864475
-0.01125	-0.0234375	0.00188925	0.03	0.00116618			-0.0042034	-0.0165405	0.00416259			1.29698	0.204185	0.878855
0.0196875	0.0184375	0.00190734	0.03	0.00117138			-0.0042458	-0.0200994	0.00430121			1.284	0.21809	0.891072
0.0165625	0.0075	0.0019049	0.02875	0.00117339			-0.00464861	-0.0205405	0.00426601			1.27092	0.237478	0.907854
0.0103125	-0.0165625	0.00190717	0.029375	0.00116913			-0.00483862	-0.0212023	0.00441228			1.26335	0.258303	0.925777
0.0228125	-0.0328125	0.00189223	0.0296875	0.00117742			-0.00528793	-0.0210699	0.00434818			1.25371	0.269792	0.946191
0.0075	0.015625	0.00189404	0.02875	0.00117029			-0.00586787	-0.0225994	0.00435171			1.23976	0.282261	0.960375
0.0103125	0.02125	0.00188426	0.028125	0.00116607			-0.00609584	-0.0246288	0.00442664			1.22584	0.301649	0.974961
-0.0303125	0.001875	0.0019121	0.028125	0.00118189			-0.0055568	-0.02657	0.00444894			1.21382	0.322996	0.995188
0.0059375	0.0075	0.00190023	0.0284375	0.00117315			-0.00489286	-0.0250847	0.00460182			1.20518	0.337618	1.00892
-0.01	0.015	0.001886	0.0284375	0.00116858			-0.00418714	-0.0215552	0.0046744			1.19626	0.35433	1.02202
0.0184375	-0.0003125	0.00187007	0.028125	0.0011725			-0.00377338	-0.0195111	0.00461926			1.18398	0.371891	1.04408
0.0128125	0.0103125	0.00185153	0.0278125	0.00117074			-0.00445141	-0.0188052	0.00465085			1.17735	0.385534	1.06927
0.021875	0.0225	0.00191821	0.0278125	0.00117808			-0.00466773	-0.0194376	0.00468835			1.16388	0.40081	1.09352
0.00375	-0.0109375	0.00198251	0.0278125	0.00116719			-0.00452428	-0.017467	0.00463835			1.15054	0.425094	1.10939
-0.0025	0.045	0.00197632	0.0303125	0.00115519			-0.00540384	-0.014864	0.00467443			1.13623	0.442067	1.12631
0.0234375	-0.095625	0.00196771	0.0290625	0.00116428			-0.00537053	-0.0120993	0.00463097			1.12747	0.455319	1.14783
0.01625	0.0384375	0.00198608	0.0278125	0.00116607			-0.0057355	-0.0119816	0.00481764			1.11681	0.471574	1.16952
-0.0053125	-0.0871875	0.00198359	0.0290625	0.00115689			-0.00511783	-0.0140846	0.00516019			1.10576	0.492267	1.19606
-0.006875	0.0221875	0.00196301	0.0284375	0.0011494			-0.00409918	-0.0170699	0.00523805			1.09573	0.512961	1.21646
0.01	0.004375	0.00195832	0.0278125	0.00114512			-0.00358262	-0.0174964	0.00517595			1.0832	0.53124	1.2398
0.0325	-0.0059375	0.00197211	0.028125	0.0011634			-0.00342419	-0.016864	0.00558656			1.06906	0.553566	1.25443
0.0078125	0.0096875	0.00195324	0.02875	0.00115676			-0.00432587	-0.0172023	0.00568032			1.05731	0.571518	1.27865
-0.0134375	0.0178125	0.00193273	0.0271875	0.00115582			-0.00441446	-0.019217	0.0056718			1.04877	0.586336	1.29632
-0.0284375	0.0078125	0.00192653	0.02625	0.0011699			-0.00433342	-0.0207611	0.00568623			1.03572	0.608597	1.31443
-0.0253125	0.06125	0.0019326	0.0271875	0.00118068			-0.0043188	-0.0207905	0.00593188			1.02307	0.633403	1.33093
0.01625	-0.181875	0.00190953	0.0271875	0.00118227			-0.00490616	-0.0198493	0.00606844			1.01399	0.653379	1.35338
-0.0284375	0.064375	0.0018905	0.02625	0.00119602			-0.00480285	-0.0152611	0.00620238			1.00429	0.667414	1.3777
-0.0065625	0.021875	0.0018767	0.026875	0.00118772			-0.00408594	-0.0142464	0.00626852			0.993893	0.689479	1.39891
-0.0103125	0.0078125	0.00186683	0.026875	0.00118328			-0.00415212	-0.0135258	0.0062639			0.986813	0.709129	1.42182
0.010625	-0.0534375	0.0018702	0.02625	0.00117921			-0.0033494	-0.0132316	0.00614508			0.975158	0.729039	1.45145
0.0103125	0.019375	0.00186134	0.026875	0.00117487			-0.00390956	-0.0107905	0.00626217			0.967304	0.75365	1.47362
0.005	0.0084375	0.00184197	0.02875	0.00116528			-0.00423111	-0.00852573	0.00613227			0.95542	0.774735	1.49034
0.0096875	-0.003125	0.0018294	0.02875	0.00116049			-0.00388069	-0.00704042	0.00611474			0.943806	0.792361	1.51821
-0.0059375	0.019375	0.00180761	0.02625	0.00115201			-0.00388785	-0.00618747	0.00617063			0.93837	0.806853	1.5488
0.0103125	0.015	0.00180797	0.0278125	0.00114801			-0.00447826	-0.0089375	0.0061122			0.929066	0.833879	1.56804
0.0153125	0.0409375	0.00182082	0.0278125	0.00114906			-0.0046804	-0.0114669	0.00609049			0.918498	0.857511	1.59004
0.0175	0.01125	0.00181258	0.0271875	0.00115229			-0.00472611	-0.0115258	0.00603779			0.911859	0.877878	1.60811
0.030625	-0.01625	0.00179569	0.026875	0.0011686			-0.00517989	-0.0105552	0.00615247			0.903035	0.898572	1.62625
0.0375	0.0203125	0.00178776	0.0275	0.00119159			-0.00366256	-0.011761	0.00611822			0.893121	0.920637	1.63834
-0.010625	-0.0215625	0.00176711	0.0265625	0.00118741			-0.00394948	-0.014114	0.0061701			0.882562	0.942375	1.65748
0.0228125	0.0209375	0.00179047	0.025	0.00119547			-0.00393577	-0.015364	0.00617793			0.873715	0.963265	1.67634
0.0090625	-0.016875	0.00177011	0.025625	0.00118968			-0.0036175	-0.0158052	0.0061183			0.863578	0.990878	1.70008
0.018125	0.00875	0.00174843	0.0275	0.00119303			-0.00259286	-0.0125552	0.00613833			0.855384	1.01236	1.7207
-0.015	0.030625	0.00174827	0.02625	0.00119321			-0.00289768	-0.00899632	0.00614983			0.846916	1.02887	1.7485
0	0.008125	0.00173624	0.025625	0.00117839			-0.00198588	-0.00805514	0.00639801			0.836695	1.0497	1.77483
-0.0075	0.0059375	0.00174624	0.025	0.00117125			-0.00108617	-0.00824631	0.00645115			0.825518	1.07646	1.79644
-0.0034375	0.02375	0.00172455	0.0265625	0.00116014			-0.00123886	-0.00724631	0.00643369			0.815204	1.09715	1.81013
0.0065625	-0.005	0.00171219	0.0259375	0.00115229			-0.0014543	-0.00433452	0.00646681			0.801971	1.11837	1.83082
-0.00625	0.024375	0.0017131	0.0278125	0.00114422			-0.00166476	-0.00180508	0.00645945			0.791397	1.14298	1.85067
-0.0021875	-0.0096875	0.00170339	0.0275	0.0011322			-0.00166251	-0.000819782	0.00694524			0.785203	1.16302	1.86983
-0.01375	0.005	0.00169973	0.0259375	0.00113188			-0.00217667	-0.00158449	0.0070084			0.778211	1.17791	1.88265
0.011875	0.008125	0.00168768	0.025625	0.0011297			-0.00178097	-0.00392275	0.00695347			0.770702	1.20513	1.9021
-0.0078125	0.003125	0.00167171	0.02625	0.00112348			-0.0014502	-0.00598159	0.00694403			0.760973	1.23418	1.91679
-0.0084375	0.0578125	0.00165469	0.028125	0.00111796			-0.0014891	-0.00523158	0.00703005			0.752548	1.25174	1.92425
0.0215625	-0.01	0.00166414	0.0259375	0.00112563			-0.00153059	-0.00568747	0.00698373			0.746362	1.271	1.93934
0.0171875	0.0209375	0.00165034	0.0259375	0.00112884			-0.00109212	-0.00684924	0.00687097			0.743033	1.29306	1.95688
-0.004375	-0.0065625	0.00164297	0.0246875	0.00111919			-0.00187348	-0.00836396	0.0069194			0.737942	1.318	1.97325
-0.018125	0.0259375	0.00163881	0.0253125	0.00112341			-0.0011614	-0.0103199	0.00712046			0.734363	1.33915	1.99334
0.0028125	-0.0146875	0.00162157	0.025625	0.00111227			-0.000471251	-0.0087169	0.0074333			0.727317	1.3648	2.01646
-0.0059375	0.008125	0.00162674	0.026875	0.00110439			-0.000757026	-0.00676101	0.00737852			0.72072	1.38661	2.03974
0.0128125	0.0178125	0.00162747	0.0265625	0.00110348			-0.000435137	-0.00293745	0.00732069			0.710625	1.40338	2.05484
-0.0184375	0.00375	0.00161163	0.025625	0.00110821			-0.000659793	-0.00226097	0.00720042			0.702189	1.4216	2.07333
-0.0034375	0.0246875	0.00160849	0.02625	0.00109788			-0.0010171	-0.0020845	0.00720883			0.69339	1.44823	2.09213
0.0015625	-0.02875	0.00160163	0.0275	0.00108581			-0.00106599	-0.00121684	0.00721006			0.68316	1.4718	2.1144
0.046875	0.00625	0.00158361	0.028125	0.0011192			-0.000727186	0.00112141	0.00723085			0.674187	1.48949	2.13249
-0.0065625	0.0115625	0.00156675	0.0278125	0.00111186			0.000115331	0.00340084	0.00711818			0.666221	1.50842	2.15089
0.0115625	-0.00375	0.00154854	0.0278125	0.00110961			0.000452551	0.00418026	0.00729031			0.65708	1.52879	2.18163
-0.00625	-0.0075	0.00153305	0.028125	0.00110207			0.000362315	0.00253319	0.00740772			0.649726	1.54765	2.20543
-0.0159375	0.01125	0.00152932	0.0278125	0.00110432			0.000217025	-0.000702134	0.00755353			0.644458	1.56946	2.22792
0.0090625	0.019375	0.00152595	0.0275	0.00109966			0.0010355	-0.0013639	0.00757653			0.637852	1.59505	2.2491
-0.00625	-0.0059375	0.00152887	0.029375	0.00109225			0.00146902	-0.000658015	0.00758471			0.629357	1.61378	2.26879
0.00625	0.0159375	0.00154894	0.028125	0.00108494			0.00106449	-0.00140802	0.00793051			0.623147	1.62854	2.28529
0.0153125	0.0325	0.00154095	0.0275	0.00108677			0.00085507	-0.00349627	0.00790151			0.61533	1.64969	2.30575
-0.0159375	-0.0146875	0.0015268	0.0265625	0.00108921			0.00171718	-0.00523158	0.00776713			0.611627	1.67423	2.31992
-0.0375	-0.025625	0.00153034	0.0278125	0.00111318			0.00117412	-0.00671689	0.00762683			0.604367	1.69218	2.33363
-0.0003125	-0.0059375	0.00152945	0.0275	0.00109966			0.00114033	-0.00436393	0.0075787			0.597763	1.71001	2.35099
-0.006875	-0.0153125	0.0015592	0.0284375	0.00109288			0.000860706	-0.00120214	0.00750167			0.591252	1.73174	2.36371
-0.01125	-0.00625	0.00155671	0.0284375	0.00109055			0.00106784	0.000327287	0.00743652			0.586848	1.74532	2.38089
-0.0171875	-0.0015625	0.00156143	0.0275	0.00109419			0.000699845	0.000356699	0.0073685			0.580489	1.76158	2.40368
0.00625	0.0046875	0.0015436	0.0278125	0.00108685			-0.000328491	0.00122435	0.00755014			0.573475	1.78351	2.412
0.020625	-0.0240625	0.00153193	0.0303125	0.00109397			-0.000527532	0.00272437	0.00750566			0.568557	1.80714	2.42646
-0.0234375	-0.0096875	0.00151352	0.03	0.00110382			-0.00122895	0.00434202	0.00752289			0.560793	1.81942	2.4466
0.0378125	-0.0034375	0.00155316	0.03	0.00112792			-0.00191626	0.0072244	0.00744398			0.553692	1.83371	2.4615
0.02	0.02125	0.00162949	0.0290625	0.00113391			-0.00185009	0.00610675	0.00742711			0.546724	1.85147	2.47329
0.0065625	-0.01125	0.00170206	0.03	0.00112639			-0.00156849	0.00276848	0.00741295			0.539594	1.87099	2.48634
-0.0121875	0.038125	0.00178435	0.029375	0.00112458			-0.0013812	0.000444935	0.00750641			0.534932	1.88626	2.50505
0.021875	0.0146875	0.0018125	0.029375	0.00113249			-0.000756041	0.000621406	0.00753041			0.530189	1.90493	2.51332
-0.0253125	0.07875	0.00182592	0.0309375	0.00114373			-0.000374141	4.78724e-05	0.00757386			0.521887	1.9223	2.52665
0.0178125	0.111562	0.00186418	0.0296875	0.00114734			-0.000190143	-0.000481544	0.00752832			0.516544	1.9334	2.54454
0.023125	-0.0090625	0.00184758	0.0284375	0.00115621			-0.000477099	-0.00386393	0.00764692			0.511684	1.94893	2.55675
-0.0475	0.0296875	0.00182526	0.0275	0.00118935			-0.000698154	-0.00511393	0.00778748			0.505234	1.96845	2.57243
-0.0084375	-0.00625	0.00183696	0.029375	0.00118301			-0.000588631	-0.00605512	0.00769634			0.500942	1.98575	2.58756
0.0315625	0.014375	0.00183758	0.0290625	0.00119988			-0.000617448	-0.0023345	0.00764175			0.494499	1.99776	2.59665
-0.004375	-0.00125	0.00181538	0.0290625	0.00118935			-0.000645139	0.000180227	0.00768703			0.488519	2.01056	2.61713
-0.0109375	-0.003125	0.00179595	0.029375	0.00118551			-0.000808698	0.00075376	0.00766777			0.481777	2.02387	2.61781
-0.0065625	0.01625	0.0018252	0.0278125	0.00117735			-0.00188755	0.000209638	0.00773055			0.475931	2.03543	2.61883
0.0128125	-0.00375	0.00183378	0.0290625	0.00117553			-0.00150775	0.00119494	0.00791026			0.47133	2.05129	2.63444
0.01875	0.0028125	0.001831	0.030625	0.00117968			-0.00199152	0.00335672	0.0080476			0.466946	2.06892	2.64711
-0.0078125	0.0109375	0.00181357	0.0315625	0.00117284			-0.00332887	0.00457732	0.00839537			0.463577	2.07832	2.65132
-0.003125	-0.0040625	0.00181698	0.0303125	0.00116139			-0.0044149	0.00685675	0.00830726			0.456994	2.08543	2.66731
0.02375	0.03625	0.00179909	0.029375	0.00117072			-0.00447699	0.00498909	0.0084024			0.450465	2.09953	2.68356
0.0259375	0.03375	0.00179018	0.03	0.00118211			-0.00479381	0.00165083	0.00873892			0.443744	2.11474	2.69456
0.0140625	0.0165625	0.00179607	0.0303125	0.00118149			-0.00353062	-0.000952136	0.00874667			0.438111	2.12512	2.70464
-0.0178125	0.0109375	0.00178188	0.029375	0.00118463			-0.00463184	0.000253756	0.00877729			0.43317	2.13772	2.71651
-0.0015625	0.013125	0.00179287	0.030625	0.00117147			-0.00554469	0.000297873	0.00897047			0.427016	2.14791	2.72699
0.0203125	0.0025	0.00181091	0.03	0.00117723			-0.00623303	-0.00227568	0.00909756			0.422804	2.15724	2.74144
0.0234375	0.009375	0.00180748	0.02875	0.00118605			-0.00673736	-0.00443746	0.00924685			0.418746	2.16677	2.75476
0.0046875	0.005	0.00181253	0.0284375	0.001176			-0.00652125	-0.00608453	0.00935632			0.415053	2.18185	2.77233
-0.014375	-0.005625	0.00180439	0.0296875	0.00117577			-0.00625166	-0.005261	0.00959681			0.409804	2.19204	2.7818
0.0171875	0.0071875	0.00180416	0.029375	0.00117835			-0.00611317	-0.00205509	0.00987736			0.405122	2.19726	2.78948
-0.0109375	-0.040625	0.00179956	0.02875	0.00117465			-0.00560315	0.00053317	0.00987565			0.401875	2.20522	2.79834
0.00375	0.134375	0.00178627	0.029375	0.00116381			-0.00493171	0.000503759	0.00981975			0.397548	2.21332	2.80913
0.0178125	-0.061875	0.00181595	0.0296875	0.00116716			-0.00438865	0.000253756	0.00978007			0.39241	2.2222	2.81882
-0.0040625	0.0425	0.00181621	0.02875	0.00115673			-0.00367304	0.00170965	0.00978547			0.388009	2.2297	2.8263
-0.000625	-0.006875	0.00182334	0.03	0.00114298			-0.00345499	0.00385673	0.00972981			0.382286	2.2408	2.84027
0.02	0.0528125	0.00181944	0.03125	0.00114878			-0.00245314	0.0057538	0.00972742			0.378486	2.24602	2.84869
0.00125	0.0365625	0.00180152	0.029375	0.00113576			-0.00234414	0.00572439	0.0100931			0.374665	2.24909	2.85946
0.008125	-0.01375	0.00179508	0.0284375	0.00112978			-0.00212643	0.00398908	0.0103076			0.368588	2.25549	2.86705
0.0015625	0.0340625	0.00180778	0.0296875	0.00111731			-0.00273333	0.00168024	0.0106344			0.364179	2.2658	2.8712
-0.0015625	-0.0009375	0.00182282	0.03	0.00110499			-0.00317109	-0.00034919	0.0106616			0.361352	2.27305	2.88543
-0.0009375	0.00375	0.00180549	0.0290625	0.0010922			-0.0032671	0.000871408	0.0106565			0.356497	2.27742	2.895
-0.0021875	0.005625	0.00179213	0.03	0.00108082			-0.00288017	0.000209638	0.010909			0.35288	2.28232	2.90414
0.0096875	0.0190625	0.00177799	0.0290625	0.00107708			-0.00244187	-0.00217273	0.0110269			0.348222	2.2863	2.91133
-0.01875	-0.0128125	0.00176497	0.028125	0.00108245			-0.00347812	-0.00468746	0.0113237			0.343014	2.291	2.9196
-0.0075	0.0134375	0.00175273	0.0284375	0.00107651			-0.00306856	-0.00571688	0.01168			0.338527	2.29897	2.933
0	0.0021875	0.00175689	0.03	0.00106313			-0.00317123	-0.00354039	0.0118445			0.333196	2.30451	2.94077
-0.024375	-0.00125	0.00174132	0.0290625	0.0010743			-0.00334112	-0.00056978	0.0118145			0.326696	2.30654	2.95188
-0.001875	0.0096875	0.00175219	0.028125	0.00106283			-0.00305639	0.00209201	0.0117989			0.322588	2.30367	2.95818
0.01125	0.02	0.0017448	0.0275	0.00106088			-0.00317076	0.00248907	0.0117597			0.320175	2.30726	2.96002
0.0071875	0.0025	0.00172875	0.02875	0.00105489			-0.00319444	0.00147435	0.0118611			0.31741	2.31404	2.96109
0.0015625	0.0009375	0.00170852	0.02875	0.00104335			-0.00393967	0.0037979	0.0119181			0.313732	2.31404	2.96075
0.0121875	0.018125	0.00171292	0.0290625	0.00104257			-0.00385837	0.00682734	0.0122963			0.309209	2.31561	2.96776
0.0003125	0.001875	0.00175102	0.0296875	0.00102994			-0.00355645	0.00832735	0.0124036			0.305835	2.31757	2.96612
-0.021875	0.016875	0.00174208	0.0290625	0.00103902			-0.00472123	0.00848912	0.0125328			0.302892	2.31385	2.9701
-0.015625	0.0215625	0.00173544	0.028125	0.00104174			-0.00450477	0.00503321	0.0125118			0.298291	2.31594	2.97765
0.0528125	0.000625	0.0017267	0.0278125	0.00108161			-0.00461962	0.00362143	0.0126068			0.292757	2.32051	2.99896
0.0428125	0.003125	0.00174712	0.0296875	0.00111098			-0.00428515	0.00356261	0.0128754			0.28972	2.32247	3.02053
-0.0021875	-0.0184375	0.00176448	0.0284375	0.00109937			-0.00479828	0.00393026	0.0128511			0.287463	2.31972	3.02069
0.0028125	-0.0021875	0.00174881	0.0275	0.00108853			-0.00494334	0.00313613	0.0132912			0.282142	2.31692	3.02493
0.031875	0.0125	0.00175521	0.0278125	0.00110688			-0.0039738	0.000356699	0.0131993			0.278656	2.31927	3.03708
-0.0171875	0.0128125	0.00173591	0.028125	0.00111032			-0.00444617	-0.00171685	0.0133171			0.275645	2.31822	3.04024
0.01	0.018125	0.00172122	0.026875	0.00110652			-0.00402073	-0.00181979	0.0135425			0.272916	2.31685	3.0422
0.0228125	-0.0025	0.00177359	0.0271875	0.00111559			-0.0042501	0.00145965	0.013558			0.268312	2.31803	3.04142
0.0215625	0.0028125	0.00182687	0.0278125	0.0011233			-0.00471057	0.00459203	0.0136205			0.265866	2.31235	3.05047
-0.023125	0.013125	0.00182543	0.0275	0.00113247			-0.00497908	0.00609204	0.013801			0.265835	2.30575	3.0474
-0.0053125	-0.0925	0.00182713	0.0271875	0.00112371			-0.0052635	0.00643028	0.0142604			0.262142	2.30327	3.0448
0.03	0.0503125	0.00181193	0.0271875	0.00113975			-0.00560748	0.0067244	0.014242			0.258414	2.30602	3.04489
-0.0034375	-0.0521875	0.00179723	0.0284375	0.00112903			-0.0052415	0.00932736	0.0144593			0.255998	2.29825	3.04566
0.040625	0.0353125	0.00177522	0.0278125	0.00115563			-0.00549187	0.0126509	0.0144598			0.251905	2.2927	3.04728
0.001875	-0.0078125	0.00178973	0.0278125	0.00114315			-0.00580609	0.0123715	0.0144952			0.249629	2.28754	3.04527
0.0209375	-0.02625	0.00178469	0.028125	0.00114989			-0.00585475	0.0118715	0.0145365			0.245837	2.28082	3.05333
-0.0121875	-0.0003125	0.00177189	0.0271875	0.00114779			-0.00581276	0.00862147	0.0144521			0.242409	2.2754	3.06172
0.02625	-0.01375	0.00175801	0.0275	0.00115978			-0.00575976	0.00781264	0.0144382			0.239035	2.27344	3.06462
0.0065625	0.000625	0.00174835	0.02875	0.00115194			-0.00616684	0.00840088	0.0147845			0.234794	2.27318	3.07764
-0.0159375	0.00125	0.00174507	0.02875	0.00115357			-0.00648344	0.00813617	0.0149073			0.231473	2.25999	3.07829
0.0259375	0.0065625	0.00174058	0.0265625	0.00116517			-0.0064575	0.00666557	0.0148587			0.227677	2.25105	3.07894
-0.00375	0.004375	0.00176459	0.0253125	0.00115445			-0.00665737	0.00431261	0.014992			0.224079	2.24837	3.08381
0.0021875	-0.02125	0.00176767	0.0265625	0.0011423			-0.00650691	0.00323907	0.0148633			0.222562	2.24341	3.09668
-0.023125	0.01625	0.00176758	0.0265625	0.00115123			-0.00629521	0.00388614	0.0148799			0.219622	2.23741	3.10243
0.006875	0.02875	0.00175938	0.02625	0.00114381			-0.0065879	0.00809206	0.014915			0.21788	2.22598	3.10252
-0.026875	0.0140625	0.00174252	0.0271875	0.00115647			-0.00607276	0.00978325	0.0152376			0.215111	2.21834	3.10258
-0.0096875	0.0171875	0.00173337	0.02625	0.00115179			-0.00625894	0.0107538	0.0150159			0.212916	2.20548	3.09923
-0.0096875	-0.0075	0.00173122	0.0259375	0.00114717			-0.00649513	0.010548	0.0149757			0.211076	2.19582	3.10028
-0.0040625	-0.01625	0.00173877	0.026875	0.00113699			-0.00652908	0.0126509	0.0152335			0.209321	2.19419	3.1056
0.00375	-0.0240625	0.00172186	0.028125	0.00112661			-0.00676192	0.0143421	0.0154288			0.208482	2.18264	3.11004
-0.0028125	0.0365625	0.0017311	0.028125	0.00111543			-0.00711115	0.0170627	0.0155947			0.206909	2.16743	3.10428
-0.030625	-0.0046875	0.00171772	0.026875	0.0011322			-0.00749606	0.0178421	0.015682			0.205947	2.15437	3.10318
0.016875	0.005	0.00171669	0.0275	0.00113501			-0.00776075	0.0155921	0.0156907			0.205058	2.14791	3.10718
0.0046875	-0.0028125	0.00174162	0.0278125	0.0011256			-0.00667079	0.0127833	0.0157408			0.202253	2.13642	3.10699
-0.005625	0.0190625	0.00177436	0.02625	0.00111724			-0.00689725	0.0125039	0.0157268			0.201745	2.12565	3.11078
0.0353125	-0.0025	0.00179794	0.0275	0.00113867			-0.00583803	0.0127686	0.0161521			0.201021	2.11625	3.10944
-0.0121875	-0.0075	0.00184592	0.0284375	0.00113672			-0.00574469	0.0121803	0.0161384			0.200938	2.10247	3.10422
0.00875	0.0125	0.0018808	0.0265625	0.00113135			-0.0061966	0.0101362	0.0163423			0.199561	2.08798	3.10315
-0.003125	-0.0115625	0.00188963	0.0246875	0.00112042			-0.00593488	0.00823912	0.0162497			0.19688	2.07669	3.10977
-0.008125	0.02375	0.00187959	0.026875	0.00111462			-0.00604658	0.00754793	0.0165414			0.195769	2.07107	3.1088
0.0265625	0.0121875	0.00185999	0.0275	0.00112734			-0.00559973	0.00909206	0.0165035			0.19338	2.05625	3.10918
0.01875	0.0096875	0.00184626	0.026875	0.00113209			-0.00598341	0.0123862	0.0164082			0.19168	2.03941	3.11255
-0.0171875	0.01375	0.00182708	0.026875	0.00113521			-0.00591366	0.014798	0.0164951			0.189073	2.0259	3.11308
0.038125	0.0071875	0.00181844	0.0265625	0.00115923			-0.00489743	0.0138568	0.0164972			0.186436	2.01127	3.1124
-0.013125	-0.0125	0.00181023	0.0265625	0.00115796			-0.00596167	0.0148715	0.0167486			0.187047	1.99659	3.1024
0.0075	0.01125	0.00179055	0.0275	0.00115108			-0.00582293	0.0165774	0.0166492			0.186536	1.98699	3.09486
-0.005	-0.009375	0.001788	0.0303125	0.00114178			-0.00515106	0.0194157	0.0169295			0.185171	1.9725	3.0931
0.0403125	0.020625	0.00179048	0.0296875	0.00116791			-0.00571808	0.0213716	0.0170105			0.183901	1.952	3.08787
-0.00375	-0.0121875	0.00177105	0.0284375	0.00115715			-0.00566933	0.020548	0.0171882			0.183313	1.93313	3.0928
-0.0325	0.0153125	0.0017578	0.028125	0.00117527			-0.005575	0.0186804	0.0173792			0.180277	1.92236	3.0904
-0.025625	0.020625	0.00175065	0.029375	0.0011863			-0.00552649	0.0152245	0.017962			0.177455	1.90905	3.08556
0.0071875	0.0234375	0.00173046	0.0290625	0.00117875			-0.00564942	0.0155921	0.0181876			0.177296	1.89273	3.08124
0.02375	0.00625	0.00172147	0.0290625	0.00118786			-0.0056123	0.016298	0.0183743			0.174515	1.87784	3.0674
0.0221875	-0.0178125	0.00172915	0.03	0.00119529			-0.00569338	0.0140039	0.0187621			0.172538	1.85813	3.05281
0.0215625	0.04625	0.00171454	0.02875	0.001202			-0.00586118	0.012298	0.0189331			0.169334	1.84142	3.03775
-0.0225	0.075	0.00171106	0.0265625	0.00120957			-0.00605922	0.0106068	0.0189276			0.168248	1.82712	3.02808
0.0278125	0.01625	0.00170136	0.0284375	0.00122236			-0.0060247	0.00984207	0.0191551			0.169443	1.81596	3.02268
-0.02625	-0.0384375	0.00168054	0.0290625	0.00123342			-0.00568508	0.0117391	0.0193918			0.171932	1.79735	3.02032
0.014375	0.024375	0.00167091	0.02875	0.00123248			-0.00494875	0.0163715	0.0195549			0.174061	1.77418	3.01742
-0.0228125	0.0225	0.00168953	0.028125	0.00123998			-0.00536206	0.0168274	0.0196924			0.173985	1.75786	3.00825
0.00875	0	0.0017523	0.029375	0.00123333			-0.00559785	0.0158568	0.0199017			0.173036	1.74239	3.00071
-0.00375	-0.02125	0.00177334	0.02875	0.00122176			-0.00524584	0.0168568	0.0198672			0.168972	1.72385	2.99687
0.020625	0.0025	0.00179819	0.029375	0.0012272			-0.00444031	0.0194304	0.0197786			0.167808	1.7057	2.98443
-0.0071875	0.02125	0.00177866	0.031875	0.00121915			-0.00475297	0.021151	0.0201431			0.168954	1.68846	2.97094
-0.0096875	-0.010625	0.0017575	0.0315625	0.00121369			-0.00415441	0.0224304	0.0204271			0.170725	1.66581	2.96052
0.0153125	-0.031875	0.00177817	0.0290625	0.00121393			-0.0044029	0.0212245	0.020506			0.173088	1.64453	2.95663
0.0165625	0.0125	0.00175796	0.0290625	0.00121541			-0.00439126	0.018151	0.0204553			0.173075	1.62978	2.94695
-0.003125	-0.015625	0.00178706	0.0303125	0.00120344			-0.00420508	0.0157686	0.020717			0.174781	1.6147	2.93449
-0.0046875	0.0225	0.00179861	0.030625	0.00119317			-0.00427208	0.0159451	0.0208694			0.174805	1.59257	2.92235
-0.0109375	-0.024375	0.00181283	0.030625	0.00118929			-0.00425053	0.0150039	0.021238			0.174351	1.57102	2.91273
-0.0034375	-0.0215625	0.0017975	0.03	0.00117795			-0.00406609	0.0136215	0.0218651			0.176198	1.55072	2.90644
-0.023125	0.0884375	0.00179642	0.0290625	0.00118645			-0.00299432	0.0117391	0.0225832			0.177097	1.53257	2.90148
-0.01	0.003125	0.00178348	0.0296875	0.00118171			-0.00211749	0.00995972	0.0229773			0.179203	1.5124	2.89584
0.025625	0.0128125	0.00176601	0.0303125	0.00119265			-0.000977574	0.0105038	0.0230827			0.179138	1.49654	2.88168
-0.0359375	0.0103125	0.0017772	0.0303125	0.00121377			-0.00110084	0.0126509	0.0232867			0.181708	1.47565	2.8685
0.001875	0.0065625	0.00180293	0.0296875	0.00120057			-0.000658474	0.0160186	0.0234908			0.18524	1.45097	2.85411
-0.016875	-0.0109375	0.00179335	0.0290625	0.00120253			-0.000755683	0.0161362	0.0238481			0.187984	1.42747	2.84051
0.013125	0.0115625	0.00179513	0.029375	0.00120072			-0.000474598	0.0158715	0.0240198			0.190563	1.41154	2.83189
0.0396875	0.0128125	0.00180471	0.0309375	0.00122549			-0.000932713	0.0166215	0.0242952			0.195116	1.39039	2.8237
0.01125	0.00625	0.00181104	0.030625	0.00122152			-0.000700223	0.0191216	0.0250465			0.199086	1.36689	2.81126
0.0109375	0.013125	0.00180042	0.0315625	0.00121728			-0.000449838	0.0208422	0.0255317			0.205456	1.34626	2.80428
0.0153125	0.021875	0.0018143	0.0309375	0.00121747			-0.00194256	0.0213275	0.0258216			0.210648	1.32355	2.79017
0.0140625	0.02375	0.00181864	0.0309375	0.00121641			-0.00130197	0.019151	0.0259391			0.21726	1.29939	2.78283
-0.003125	-0.0025	0.00183418	0.03	0.00120443			-0.000615462	0.0163862	0.0264646			0.218694	1.2789	2.77627
0.02	0.0121875	0.00182795	0.03125	0.00120947			-0.000705509	0.0162833	0.0269663			0.225654	1.2614	2.75982
0.000625	0.0028125	0.00180993	0.03125	0.00119507			-0.00188184	0.0157539	0.0273644			0.231147	1.23764	2.74452
0.01125	0.025	0.00179308	0.0303125	0.00119147			-0.00241713	0.0150921	0.0277817			0.230888	1.21146	2.7416
0.001875	0.020625	0.00179018	0.029375	0.00117854			-0.00260332	0.0127539	0.0278679			0.232036	1.18985	2.73062
-0.03125	0.0090625	0.00181825	0.029375	0.00119515			-0.00239086	0.0105333	0.0286773			0.234988	1.17138	2.71683
0.0090625	0.188125	0.00188816	0.03	0.00118937			-0.00202867	0.00915089	0.0286448			0.233144	1.14736	2.70905
0.0034375	0.0296875	0.00223533	0.0290625	0.00117803			-0.00154168	0.0116362	0.028929			0.235244	1.12555	2.69751
-0.0296875	0.0025	0.0024385	0.03	0.00119309			-0.00158637	0.0147098	0.0294511			0.238149	1.10355	2.68182
0.0296875	-0.0159375	0.00242727	0.0303125	0.00120795			-0.00141425	0.0168715	0.0297522			0.243689	1.07516	2.67059
0.0065625	-0.0028125	0.00245244	0.02875	0.00119951			-0.00145051	0.017048	0.0303257			0.244333	1.04898	2.65527
-0.02125	0.001875	0.00243322	0.0290625	0.00120586			-0.0015879	0.0171804	0.0316427			0.245638	1.03174	2.64366
0.0015625	0.010625	0.00241331	0.03125	0.00119244			-0.00172744	0.0193421	0.0320237			0.245941	1.01027	2.62975
0.003125	-0.006875	0.00242958	0.0309375	0.00118076			-0.00186986	0.0208127	0.0328455			0.249437	0.984807	2.61873
-0.0034375	0.0228125	0.00240409	0.030625	0.00116953			-0.00184582	0.0232539	0.033924			0.249944	0.956606	2.60848
0.014375	0.0234375	0.00237797	0.0309375	0.00116937			-0.00177206	0.0223569	0.0344099			0.250986	0.935455	2.59107
0.0053125	-0.01375	0.00235093	0.030625	0.00116016			-0.00182389	0.0194598	0.0350608			0.250029	0.911955	2.57744
-0.0009375	-0.0084375	0.00233079	0.029375	0.00114668			-0.00161342	0.017548	0.036333			0.249392	0.888323	2.56475
0.031875	0.0028125	0.00233184	0.03	0.00116432			-0.00203661	0.018048	0.0371671			0.253805	0.868543	2.55263
-0.0096875	-0.035	0.00231787	0.031875	0.00115954			-0.00208669	0.0177245	0.0381655			0.263304	0.84563	2.54048
0.0003125	0.0025	0.00230251	0.0303125	0.00114545			-0.00195683	0.0170333	0.0387257			0.267968	0.816841	2.52627
-0.008125	-0.0046875	0.00228829	0.0290625	0.00113934			-0.00254199	0.0150627	0.039907			0.276414	0.791382	2.51915
-0.0121875	0.0234375	0.00226392	0.0290625	0.00113738			-0.00183161	0.0137686	0.0418395			0.281307	0.774474	2.50466
0.021875	-0.0334375	0.00225111	0.0296875	0.00114512			-0.0020597	0.0129892	0.0433991			0.282957	0.750125	2.48766
-0.019375	-0.035	0.00227378	0.0284375	0.00115027			-0.00227725	0.0166509	0.0457919			0.283878	0.72349	2.47448
-0.00875	0.101562	0.00225647	0.029375	0.00114474			-0.00262294	0.0199304	0.047196			0.285044	0.70025	2.45775
-0.004375	-0.0809375	0.00226656	0.0303125	0.00113489			-0.00255646	0.021548	0.0479871			0.287149	0.675313	2.43812
0.0090625	0.0184375	0.00224059	0.02875	0.00112986			-0.00383908	0.0211216	0.0491036			0.285843	0.649462	2.4208
0.0440625	0.0015625	0.00221745	0.0278125	0.00115988			-0.00226222	0.0227686	0.0502191			0.282697	0.628573	2.40733
0.0075	0.0771875	0.00220615	0.0303125	0.00115297			-0.00286589	0.025651	0.0519679			0.282402	0.609119	2.39344
0.0146875	-0.065625	0.00219187	0.0303125	0.00115334			-0.00217843	0.027151	0.0535338			0.283198	0.581636	2.38278
-0.0396875	-0.0296875	0.00221402	0.029375	0.0011787			-0.00115858	0.0291805	0.0558976			0.285148	0.554414	2.36661
-0.04	-0.0025	0.0022187	0.0290625	0.00120406			-0.000259917	0.0288716	0.0582474			0.28596	0.53137	2.35274
0.05125	0.023125	0.00221864	0.0303125	0.00124035			-0.000131205	0.0258275	0.0607599			0.285604	0.512896	2.33898
0.0296875	-0.06	0.00219796	0.02875	0.00125463			0.000361449	0.0244745	0.0626815			0.283148	0.487502	2.32559
0.0128125	0.114375	0.00220065	0.028125	0.00125186			0.000887231	0.0256657	0.0655101			0.281772	0.467918	2.3136
-0.0275	-0.0121875	0.00218394	0.029375	0.00126381			0.00168353	0.0259157	0.0673084			0.284071	0.444025	2.30208
-0.0103125	0.0603125	0.00216525	0.02875	0.00125842			0.00187198	0.0245334	0.0699533			0.287309	0.41961	2.29262
-0.0321875	0.0178125	0.00214148	0.0271875	0.00127498			0.00224432	0.0236363	0.0731696			0.289894	0.393629	2.28226
0.010625	0.00125	0.00212113	0.0275	0.00126976			0.00199485	0.0223863	0.0767985			0.2899	0.376787	2.26576
0.0046875	-0.0053125	0.00220853	0.028125	0.00125868			0.00186852	0.0238863	0.0795303			0.290701	0.357529	2.25119
0.0071875	-0.0340625	0.00223453	0.0278125	0.00125023			0.0020085	0.0276804	0.0824406			0.290771	0.328349	2.23284
0.0303125	-0.02875	0.0022099	0.0265625	0.00126501			0.00222908	0.0316364	0.0852933			0.290079	0.303934	2.21573
-0.0003125	-0.0171875	0.00221838	0.0278125	0.00124961			0.00198903	0.0328276	0.0892083			0.289853	0.283566	2.20319
0.01375	0.0065625	0.00219583	0.0284375	0.00124784			0.00228296	0.0324158	0.0924736			0.298235	0.261371	2.19098
0.044375	0.01	0.00217042	0.0275	0.00127671			0.00137041	0.0349305	0.0954677			0.301642	0.239306	2.17844
0.035625	-0.023125	0.00219596	0.028125	0.00129648			0.00144346	0.0387982	0.0985033			0.299649	0.220179	2.16704
-0.006875	0.0075	0.002169	0.02875	0.00128725			0.000806071	0.0411217	0.101641			0.297142	0.196744	2.15549
0.018125	0.0096875	0.00216861	0.0278125	0.00128938			0.000657573	0.0433276	0.105502			0.295831	0.168804	2.14426
0.003125	-0.0071875	0.00218605	0.0275	0.00127649			0.00057018	0.0419747	0.110017			0.301617	0.148501	2.12785
-0.004375	0.018125	0.00218327	0.0284375	0.00126501			0.000505418	0.0400482	0.115326			0.30505	0.134858	2.11266
0.0096875	0.0165625	0.0021574	0.02875	0.00125898			0.000733129	0.0391953	0.120966			0.309155	0.110835	2.09901
0.0128125	0.00375	0.00213435	0.0275	0.00125615			0.000522438	0.0418276	0.125326			0.313884	0.0892269	2.08502
0.00625	0.019375	0.00213159	0.0275	0.0012468			0.00114934	0.0429159	0.13017			0.319699	0.068533	2.07331
0.0053125	0.00125	0.00212854	0.0271875	0.00123662			0.000496361	0.041857	0.134497			0.323728	0.0467947	2.05789
0.0175	-0.005	0.00211898	0.026875	0.00123876			0.00146143	0.0408423	0.138566			0.323862	0.024273	2.04478
-0.0175	0.016875	0.00209766	0.02625	0.00124087			0.00127555	0.0414306	0.143911			0.32405	0.0106947	2.03111
0.015	0.0228125	0.00209066	0.0271875	0.00124046			0.00149061	0.0443129	0.150174			0.32112	-0.00836718	2.01776
-0.0084375	-0.00875	0.00206875	0.0275	0.00123349			0.00173072	0.0492689	0.156444			0.31931	-0.0352627	2.00639
-0.008125	0.0196875	0.0020518	0.026875	0.00122629			0.00226412	0.0534454	0.162852			0.317604	-0.0562176	1.99141
0.0271875	0.0025	0.00204882	0.026875	0.00123824			0.00140028	0.0548424	0.169542			0.31736	-0.0751489	1.9766
0.02125	0.00375	0.00202743	0.026875	0.00124411			0.00151451	0.0560042	0.176714			0.321206	-0.0932316	1.9635
0.0225	0.0240625	0.00203568	0.026875	0.00125116			0.000927801	0.0599013	0.184169			0.330869	-0.113795	1.94921
-0.0165625	0.0196875	0.00203571	0.0278125	0.00125218			0.000811651	0.0646513	0.19046			0.336398	-0.131812	1.94178
0.0053125	0.200625	0.00206917	0.0284375	0.00124194			0.00129875	0.0676367	0.197055			0.339744	-0.152376	1.93037
-0.0128125	-0.26375	0.00206471	0.0278125	0.00123932			0.00159049	0.0694161	0.205651			0.33816	-0.177443	1.91665
-0.020625	0.122813	0.00204	0.026875	0.00124455			0.00115751	0.0685337	0.213005			0.338552	-0.194873	1.9078
0.0121875	0.015	0.00212904	0.0271875	0.00124128			0.00177268	0.0684896	0.220508			0.338455	-0.208321	1.89658
-0.0090625	-0.0128125	0.00228915	0.0278125	0.00123492			0.000526312	0.0707837	0.226649			0.341564	-0.224641	1.88717
-0.0125	0.0003125	0.00228728	0.026875	0.00123208			0.00079224	0.073622	0.235296			0.341214	-0.245661	1.87374
0.03	-0.0034375	0.00229574	0.0265625	0.00124678			0.00116261	0.0742691	0.24306			0.340384	-0.267073	1.86232
-0.0178125	0.095	0.00227878	0.0265625	0.0012491			0.001199	0.0747985	0.251342			0.338307	-0.282544	1.8487
-0.005	0.0128125	0.0022636	0.0265625	0.00123858			0.00140039	0.0753573	0.259388			0.337734	-0.300235	1.83404
0.0221875	0.0275	0.0022758	0.0265625	0.00124539			0.00173088	0.0786956	0.269771			0.334894	-0.315903	1.81882
0.00625	0.01125	0.00227565	0.0275	0.00123616			0.00214422	0.084328	0.27865			0.335034	-0.330395	1.80097
-0.004375	-0.1175	0.00225769	0.0271875	0.00122518			0.00227308	0.0900339	0.287772			0.335301	-0.352068	1.78786
-0.013125	0.0196875	0.00223434	0.0265625	0.00122309			0.00145531	0.0942251	0.2976			0.335364	-0.372762	1.77567
-0.0034375	-0.0653125	0.00224189	0.02625	0.00121133			0.00063999	0.0981222	0.308337			0.335221	-0.387972	1.76247
-0.0028125	0.0225	0.00222811	0.0278125	0.0011991			0.000366579	0.101181	0.317686			0.337311	-0.399461	1.74658
0.04375	-0.008125	0.00220137	0.02875	0.00122795			0.000579857	0.10749	0.329182			0.338398	-0.419503	1.7299
0.0046875	-0.00625	0.00222496	0.028125	0.00121739			0.000630412	0.114416	0.338636			0.337356	-0.438891	1.71587
-0.02625	0.0303125	0.00225857	0.0284375	0.00122851			0.00134371	0.118814	0.349767			0.33932	-0.454166	1.7035
0.0053125	-0.0053125	0.00227176	0.02875	0.00121857			0.00135091	0.121137	0.361067			0.343248	-0.472967	1.69067
0.0096875	0.014375	0.0025001	0.028125	0.00121312			0.00155196	0.122019	0.37319			0.350253	-0.487916	1.67966
-0.019375	0.011875	0.00258717	0.0275	0.00121742			0.0017936	0.124814	0.386214			0.351275	-0.499993	1.66413
-0.0175	-0.0040625	0.00258347	0.0290625	0.0012198			0.00167593	0.129343	0.400371			0.354494	-0.512201	1.65345
-0.0078125	0.0528125	0.00256888	0.028125	0.00121246			0.00129808	0.133387	0.41376			0.357048	-0.533808	1.63969
0.0184375	0.040625	0.00254166	0.0275	0.00121583			0.0022932	0.136328	0.42777			0.357637	-0.550455	1.62818
-0.0178125	-0.00875	0.00251196	0.02625	0.00121854			0.00244484	0.139358	0.440551			0.362269	-0.56214	1.61201
0.016875	-0.015625	0.00250075	0.0278125	0.00122028			0.00203434	0.14324	0.454563			0.367426	-0.574609	1.59809
-0.02	0.0353125	0.00250063	0.026875	0.00122512			0.00155429	0.14852	0.466436			0.36972	-0.588187	1.58487
0.038125	-0.0121875	0.00248644	0.026875	0.00124803			0.00138803	0.157858	0.482985			0.371121	-0.603267	1.57461
0.0278125	-0.0115625	0.00245618	0.0278125	0.00126034			0.00187105	0.165961	0.49703			0.366274	-0.618869	1.56086
-0.0025	-0.005625	0.00242817	0.026875	0.00124718			0.00181553	0.172505	0.510737			0.365273	-0.635711	1.54753
0.0178125	0.01625	0.00240206	0.0265625	0.0012495			0.00106885	0.178035	0.523623			0.368854	-0.648049	1.53262
0.02625	-0.0171875	0.00238723	0.0275	0.00126023			0.00138884	0.185741	0.53667			0.373187	-0.655164	1.52019
-0.0003125	0.0028125	0.00238913	0.0290625	0.00124489			0.00167637	0.194314	0.549746			0.376783	-0.670832	1.51036
-0.02	0.0296875	0.00240914	0.0284375	0.00124942			0.00211733	0.203108	0.565687			0.379614	-0.686891	1.49628
0.0321875	0.0590625	0.00241578	0.0278125	0.00126609			0.00267671	0.211094	0.580323			0.379755	-0.700991	1.48598
0.0009375	-0.272188	0.00240889	0.028125	0.0012513			0.003086	0.216064	0.595215			0.383051	-0.712285	1.4722
-0.0028125	0.17625	0.00238303	0.0278125	0.00123857			0.0032655	0.219138	0.612843			0.390241	-0.72397	1.45881
0.00375	-0.0175	0.00236843	0.02625	0.00122693			0.00375059	0.22652	0.626473			0.393321	-0.733501	1.44622
-0.00375	-0.02875	0.00235151	0.0284375	0.00121544			0.00363939	0.234609	0.644161			0.393175	-0.741791	1.43216
-0.0003125	-0.008125	0.00234605	0.0275	0.00120066			0.00307861	0.241917	0.661096			0.39104	-0.757263	1.41858
-0.006875	0.0040625	0.00234722	0.02625	0.00119262			0.00265639	0.247903	0.674015			0.390107	-0.770449	1.40563
0.01625	-0.0309375	0.00233275	0.0246875	0.00119405			0.00229252	0.254594	0.690538			0.389332	-0.778609	1.39458
-0.025	0.0053125	0.00242346	0.0265625	0.00120422			0.00228486	0.262329	0.706424			0.389243	-0.784811	1.38108
-0.006875	-0.0240625	0.00283554	0.02625	0.00119613			0.00207413	0.272624	0.723293			0.390207	-0.796235	1.36611
0.0203125	-0.0975	0.00300407	0.025625	0.00120159			0.00154587	0.285815	0.740093			0.391467	-0.810075	1.35419
-0.0015625	0.0865625	0.00301081	0.0253125	0.00118822			0.00182915	0.297594	0.75922			0.39352	-0.819149	1.34297
0.02	-0.0546875	0.00302654	0.0246875	0.00119346			0.000795252	0.306183	0.777084			0.390277	-0.830899	1.33305
-0.0246875	0.028125	0.00299269	0.024375	0.00120333			0.000333675	0.316845	0.800397			0.392913	-0.84043	1.32185
-0.011875	-0.050625	0.00295989	0.025	0.00120025			-1.6737e-05	0.330095	0.817962			0.391724	-0.845522	1.31007
0.00875	0.045	0.00293531	0.0275	0.00119409			-0.000208111	0.342095	0.832941			0.38835	-0.85551	1.30221
0.003125	-0.0140625	0.00296885	0.0259375	0.00118239			-2.69479e-05	0.354904	0.848901			0.388379	-0.869806	1.29262
0.016875	0.03	0.00299822	0.0253125	0.00118457			-0.00031516	0.365713	0.863207			0.388103	-0.882405	1.2802
-0.015	0.008125	0.00300035	0.0253125	0.00118486			0.000409113	0.374124	0.879833			0.390838	-0.886648	1.26754
-0.000625	0.011875	0.00303089	0.025	0.00117076			0.000705741	0.382566	0.896904			0.392189	-0.891806	1.25357
0.035625	0.0240625	0.00302136	0.024375	0.00119185			0.000944046	0.39461	0.916064			0.399535	-0.901728	1.24022
0.041875	0.0096875	0.00302071	0.0246875	0.00121892			0.000506788	0.406831	0.931047			0.404334	-0.90904	1.22662
-0.010625	0.006875	0.00298662	0.024375	0.0012144			0.00048437	0.417404	0.950341			0.403994	-0.91844	1.21695
0.0221875	-0.01375	0.00298327	0.023125	0.0012215			-0.000395069	0.428272	0.973483			0.402609	-0.928624	1.20539
0.01125	0.0025	0.00296434	0.0215625	0.00121758			-0.000315476	0.439493	0.992149			0.405512	-0.933781	1.19359
0.0196875	0.0159375	0.00294376	0.0225	0.00122214			-0.000120662	0.452007	1.00888			0.406943	-0.936914	1.18382
-0.0021875	0.0121875	0.00292438	0.0228125	0.00120915			0.000462671	0.468066	1.02534			0.406369	-0.944813	1.1731
0.029375	0.00125	0.0029193	0.0221875	0.0012235			0.000174532	0.485449	1.04339			0.40477	-0.956825	1.16108
0.0065625	-0.0165625	0.0029171	0.0221875	0.00121486			1.31008e-05	0.500537	1.05854			0.402327	-0.96394	1.14989
0.0315625	-0.0046875	0.00289993	0.0209375	0.00123134			-0.000481854	0.513979	1.08127			0.401448	-0.969163	1.13806
0.0034375	0.041875	0.00288234	0.021875	0.00121948			4.20909e-05	0.529596	1.09771			0.409189	-0.976409	1.12814
-0.02375	0.029375	0.00287685	0.021875	0.00122808			-0.000401664	0.546758	1.11644			0.414449	-0.981435	1.11639
0.0090625	-0.02375	0.00284299	0.023125	0.00122189			-0.000173458	0.563464	1.13375			0.416302	-0.987311	1.10528
-0.0009375	0.014375	0.00282111	0.0221875	0.00120764			-3.81309e-05	0.579538	1.15456			0.416814	-0.998669	1.09379
-0.025	-0.0575	0.00278856	0.020625	0.00121764			-7.76338e-05	0.594553	1.17429			0.411598	-1.00742	1.08253
0.015	0.130313	0.00296861	0.020625	0.00121752			-0.000513745	0.606891	1.19301			0.412168	-1.00872	1.07221
0.0446875	-0.0759375	0.00294174	0.02125	0.00124708			-6.09745e-05	0.620656	1.21026			0.41115	-1.01009	1.06144
0.0265625	0.102812	0.00293144	0.0209375	0.00125815			3.75565e-05	0.63798	1.22811			0.410079	-1.01773	1.0553
0.003125	-0.316563	0.00293315	0.02	0.00124565			-0.000231449	0.653715	1.24818			0.408236	-1.02367	1.044
-0.021875	0.05625	0.00291828	0.020625	0.00125205			-0.000603313	0.668612	1.26818			0.404906	-1.02981	1.03439
-0.0075	0.07625	0.00291609	0.018125	0.001244			0.000102221	0.683068	1.29056			0.404429	-1.03483	1.02301
-0.00875	-0.0315625	0.00289674	0.0175	0.00123729			-0.000305344	0.698715	1.30689			0.401935	-1.0381	1.01191
-0.0096875	0.0171875	0.00287326	0.0184375	0.00123161			-0.000547004	0.716642	1.32506			0.397016	-1.03921	1.00286
0.0065625	-0.0140625	0.00285194	0.01875	0.00122287			-0.00110349	0.737245	1.3429			0.397508	-1.04456	0.992872
-0.0065625	0.005	0.00284214	0.0178125	0.00121424			-0.00128291	0.757466	1.36158			0.397939	-1.05344	0.981766
0.03125	0.0278125	0.00285464	0.016875	0.00123041			-0.00120767	0.776069	1.37879			0.397781	-1.05918	0.971282
0.01875	-0.0021875	0.00283262	0.0165625	0.00123388			-0.00222847	0.793746	1.39515			0.402445	-1.05873	0.960823
-0.0215625	0.0340625	0.00280243	0.0171875	0.00124011			-0.00266326	0.813393	1.41438			0.404393	-1.06186	0.949916
0.02	0.001875	0.00278262	0.016875	0.00124471			-0.00266785	0.834113	1.43604			0.402282	-1.06663	0.939445
-0.01125	0.0003125	0.00276649	0.0178125	0.00124049			-0.00246074	0.854599	1.45469			0.402036	-1.07028	0.928712
-0.05	0.0271875	0.00273588	0.016875	0.00127509			-0.00184911	0.873776	1.47148			0.403121	-1.07531	0.919586
0.0175	0.025625	0.00273408	0.015625	0.00127675			-0.00206005	0.890173	1.48933			0.401067	-1.08073	0.911601
0.0303125	0.0190625	0.00272605	0.015625	0.0012912			-0.00220758	0.906791	1.50859			0.402633	-1.08151	0.901216
0.05375	0.0153125	0.0026975	0.01625	0.00132891			-0.00220089	0.924085	1.52793			0.404309	-1.07825	0.891184
0.0084375	-0.025625	0.00300462	0.0159375	0.00132084			-0.0030539	0.943776	1.5435			0.400778	-1.08406	0.883204
-0.015	-0.0428125	0.00314229	0.014375	0.00131943			-0.00286509	0.962894	1.56566			0.403796	-1.08843	0.875144
-0.0184375	0.01375	0.00323795	0.0134375	0.00132148			-0.00187134	0.980321	1.58021			0.404548	-1.09032	0.867669
-0.0234375	-0.0053125	0.00326304	0.0134375	0.0013285			-0.00196965	0.997394	1.59267			0.402313	-1.08974	0.858996
0.03875	0.005625	0.00332875	0.013125	0.00135075			-0.0017489	1.01594	1.61021			0.400484	-1.09156	0.849852
0.04625	0.0384375	0.00329271	0.011875	0.00138022			-0.00160092	1.03773	1.63024			0.397814	-1.09293	0.841087
-0.0090625	-0.02875	0.003274	0.0128125	0.00137213			-0.00140631	1.06038	1.6498			0.39571	-1.09287	0.831805
0.01875	0.0159375	0.00333239	0.011875	0.00137384			-0.00160043	1.0827	1.66341			0.393533	-1.0994	0.824708
0.020625	-0.0090625	0.00332381	0.0109375	0.0013774			-0.0010218	1.10276	1.68045			0.39222	-1.10247	0.8159
-0.0021875	0.0571875	0.00328783	0.010625	0.00136248			-0.000767425	1.12334	1.69771			0.389482	-1.09901	0.806326
-0.01375	-0.425	0.00328324	0.0125	0.0013593			-0.000884829	1.14466	1.71597			0.389565	-1.09816	0.796994
-0.01375	0.05625	0.00338027	0.0115625	0.00135617			-0.00124012	1.16635	1.73326			0.386932	-1.10247	0.788995
0.0215625	-0.0253125	0.00341515	0.0115625	0.00136088			-0.00168179	1.18865	1.75033			0.384611	-1.10475	0.780123
0.01125	0.110937	0.0034296	0.01125	0.00135523			-0.000910532	1.20779	1.76587			0.38302	-1.10508	0.770557
0.0021875	0.0009375	0.00342575	0.0103125	0.00134058			-0.000914575	1.2254	1.7835			0.382602	-1.10462	0.76145
0.000625	0.025625	0.00341601	0.0096875	0.00132455			-0.00148651	1.24356	1.8013			0.37998	-1.10475	0.752801
0.0146875	0.280937	0.00337795	0.01	0.00132278			-0.00182662	1.26322	1.81923			0.379488	-1.09972	0.744084
-0.028125	0.095625	0.00334099	0.010625	0.00133448			-0.00216558	1.28315	1.83637			0.376532	-1.10136	0.736964
0.025	-0.0178125	0.00338355	0.00875	0.0013429			-0.000584887	1.30218	1.84909			0.378836	-1.10638	0.728205
-0.0096875	0.0984375	0.00336683	0.008125	0.00133591			-0.00100546	1.32091	1.8639			0.379441	-1.10769	0.719627
-0.0034375	-0.070625	0.00342282	0.008125	0.00132275			-0.000669713	1.33888	1.8781			0.381624	-1.10077	0.711243
0.0378125	0.0878125	0.0034203	0.0078125	0.00134413			-3.56946e-05	1.35732	1.89109			0.383397	-1.0994	0.703482
0.0328125	-0.0059375	0.00342781	0.0071875	0.00136025			-0.000956383	1.38128	1.90359			0.382299	-1.10129	0.695416
-0.0075	-0.0525	0.00339523	0.0075	0.00135085			-0.00183563	1.40413	1.91859			0.384015	-1.09959	0.687813
-0.00625	0.0640625	0.00336055	0.006875	0.00134032			-0.00209214	1.42466	1.93572			0.387138	-1.10312	0.67965
-0.000625	0.011875	0.00334912	0.0065625	0.00132429			-0.00241242	1.44413	1.94943			0.388515	-1.10233	0.672067
-0.015	0.10375	0.00335002	0.0059375	0.00132284			-0.0024863	1.46485	1.96254			0.387667	-1.1007	0.666141
0.0228125	-0.249375	0.0034359	0.008125	0.00132922			-0.0015696	1.48665	1.97418			0.389724	-1.09489	0.658247
0.019375	0.122188	0.0034776	0.0075	0.00133209			-0.00213878	1.50778	1.98565			0.392267	-1.09613	0.650414
0.0084375	-0.0584375	0.00348502	0.00625	0.00132398			-0.00203445	1.529	2.00118			0.394325	-1.10207	0.642755
0.00625	0.11625	0.00344829	0.0059375	0.00131378			-0.00168438	1.5466	2.01211			0.395554	-1.09737	0.636468
0.005625	0.0596875	0.00355077	0.006875	0.00130308			-0.00180733	1.56171	2.02798			0.394147	-1.09411	0.629004
-0.005625	0.152187	0.0035176	0.00625	0.00129252			-0.00200186	1.57887	2.04058			0.392789	-1.09241	0.622063
0.0465625	0.0521875	0.00361828	0.0053125	0.00132303			-0.00142824	1.59946	2.05153			0.392326	-1.08817	0.61613
-0.020625	0.0484375	0.00385771	0.005625	0.00132722			-0.00122192	1.61696	2.06575			0.388753	-1.08621	0.608978
-0.00875	-0.114063	0.00387041	0.005	0.00131948			-0.0019401	1.634	2.07708			0.388466	-1.08797	0.603587
-0.0109375	0.152812	0.00390108	0.0034375	0.00131403			-0.00158504	1.6503	2.08979			0.385836	-1.08797	0.596472
0.040625	-0.247812	0.00388231	0.0040625	0.00133833			-0.00152838	1.66688	2.10201			0.382548	-1.07909	0.589181
-0.029375	0.112187	0.00394096	0.00375	0.00135108			-0.00216349	1.68544	2.11629			0.377631	-1.07459	0.582364
-0.0090625	0.432813	0.00393481	0.0040625	0.00134336			-0.00305928	1.70664	2.13001			0.376738	-1.07818	0.575502
0.0175	0.265938	0.00390937	0.0034375	0.00134417			-0.00282038	1.72636	2.14464			0.376696	-1.07844	0.568426
0.009375	0.0021875	0.00398831	0.0034375	0.00133685			-0.0029423	1.74431	2.15594			0.374735	-1.07446	0.561573
0.003125	-0.0434375	0.0039497	0.00375	0.00132337			-0.0034521	1.761	2.17221			0.372541	-1.07237	0.555993
-0.0340625	0.0521875	0.00390595	0.0028125	0.00134099			-0.00342457	1.77975	2.18428			0.370881	-1.06956	0.5491
0.000625	0.025625	0.00401806	0.0040625	0.00132496			-0.00316728	1.79906	2.19334			0.367858	-1.06421	0.54268
0.0228125	-0.014375	0.00403189	0.005	0.00133131			-0.00289857	1.81696	2.20552			0.367875	-1.06343	0.536844
-0.0221875	0.026875	0.00402712	0.003125	0.00133696			-0.00369827	1.83381	2.21861			0.36671	-1.06682	0.530348
0.04875	-0.101875	0.00398834	0.0028125	0.0013691			-0.00422024	1.84664	2.22888			0.36532	-1.06186	0.524081
-0.0103125	0.19625	0.00403286	0.0034375	0.00136241			-0.00414084	1.86015	2.23786			0.364723	-1.05429	0.518346
-0.006875	-0.430937	0.00399464	0.0025	0.00135236			-0.00372227	1.87474	2.24932			0.361893	-1.05213	0.513067
0.0121875	0.798125	0.00422596	0.0025	0.00134775			-0.00386839	1.89034	2.25982			0.362982	-1.04907	0.509693
-0.0053125	-0.25125	0.00430815	0.0034375	0.00133632			-0.00403654	1.90455	2.27005			0.363083	-1.04619	0.503779
-0.0059375	-0.0034375	0.00433963	0.0025	0.00132566			-0.00329683	1.9174	2.27921			0.36167	-1.04404	0.497856
-0.0059375	0.0015625	0.00430822	0.000625	0.00131513			-0.00335434	1.92923	2.29422			0.360548	-1.04182	0.491643
0.013125	-0.031875	0.00427096	0.00125	0.00131191			-0.00387057	1.9428	2.30725			0.362153	-1.03405	0.48694
0.005	0.22375	0.00424134	0.001875	0.00130062			-0.00367546	1.95784	2.32087			0.360345	-1.02778	0.481561
-0.0171875	-0.005	0.00419209	0.00125	0.00130165			-0.00353895	1.97464	2.33233			0.359413	-1.02935	0.4759
-0.0328125	-0.1125	0.00414533	0	0.00131829			-0.00341953	1.9898	2.34269			0.356782	-1.02733	0.470754
0.021875	0.07	0.00412789	0.000625	0.00132379			-0.00314153	2.0027	2.35305			0.354747	-1.02269	0.465542
-0.046875	0.006875	0.00415256	0.00125	0.00135422			-0.00226748	2.01543	2.36157			0.353765	-1.01845	0.460529
-0.0025	-0.0421875	0.00412097	0.000625	0.0013399			-0.00289572	2.02928	2.3754			0.352728	-1.01564	0.455095
0.016875	-0.0015625	0.00415634	0.001875	0.00134013			-0.0024603	2.04423	2.3862			0.352776	-1.00938	0.449634
-0.0203125	0.034375	0.00417846	0.001875	0.00134379			-0.00243662	2.05677	2.39521			0.351306	-1.00781	0.445058
-0.0128125	-0.004375	0.00422781	0.000625	0.00133991			-0.00217621	2.06731	2.40264			0.353483	-1.01003	0.440205
0.039375	0.031875	0.00423904	-0.0009375	0.00136264			-0.00195983	2.07552	2.4102			0.352319	-1.00487	0.435415
0.011875	0.065625	0.00422169	0	0.00135759			-0.00162223	2.08348	2.42028			0.353513	-0.995471	0.430335
-0.001875	-0.0571875	0.00419769	0.0003125	0.0013426			-0.00181521	2.09392	2.42835			0.357258	-0.990118	0.426338
-0.0021875	-0.2175	0.00417992	-0.000625	0.00132811			-0.001257	2.1039	2.44092			0.359559	-0.989465	0.421113
-0.00125	0.174688	0.00419268	-0.0009375	0.00131286			-0.000487934	2.1118	2.45162			0.360294	-0.986854	0.415857
-0.033125	-0.204063	0.00414404	-0.00125	0.00132968			-0.000654217	2.11833	2.46111			0.361803	-0.980587	0.410818
0.025	0.0746875	0.00410693	-0.0021875	0.00133816			-0.000453657	2.12546	2.46885			0.361598	-0.977845	0.406528
-0.0225	0.013125	0.0040581	-0.0021875	0.00134404			-0.000295612	2.13393	2.47361			0.362161	-0.970664	0.401414
0.0134375	-0.0146875	0.00405675	-0.001875	0.00134078			0.00115951	2.14461	2.48487			0.365023	-0.963614	0.4001
-0.0275	0.025625	0.00400949	-0.0015625	0.00135163			0.00171617	2.15523	2.49167			0.364231	-0.962635	0.39553
-0.0184375	0.0159375	0.00401499	-0.0025	0.00135327			0.00212277	2.16337	2.4998			0.363361	-0.963026	0.392417
0.0003125	0.003125	0.00412512	-0.0034375	0.00133677			0.00182324	2.17054	2.50824			0.361777	-0.956825	0.388416
0.0153125	-0.023125	0.00415231	-0.0021875	0.00133548			0.00169982	2.17754	2.5175			0.358447	-0.949252	0.38387
0.0390625	0.0165625	0.00412354	-0.0015625	0.00135795			0.00202043	2.1861	2.52449			0.357416	-0.947163	0.379175
0.033125	-0.0415625	0.00408138	-0.001875	0.00137421			0.00142358	2.1937	2.53192			0.354645	-0.94403	0.37456
-0.01375	-0.06	0.00405318	-0.0025	0.00137089			0.00104347	2.20049	2.53694			0.351373	-0.939264	0.37012
0.0084375	0.1225	0.0040244	-0.001875	0.0013623			0.000998226	2.20335	2.54342			0.349022	-0.936914	0.366357
0.005	-0.149062	0.00406347	-0.00375	0.00135038			0.000290947	2.20537	2.54905			0.347002	-0.932279	0.363537
-0.0284375	0.184375	0.00410018	-0.00375	0.00136204			0.000395113	2.20718	2.55498			0.346219	-0.923858	0.359203
0.0221875	-0.306563	0.00430268	-0.001875	0.00136731			0.00163079	2.21158	2.56248			0.344022	-0.917983	0.354791
-0.0109375	0.511563	0.00436173	-0.003125	0.00136126			0.00183528	2.21457	2.56842			0.342121	-0.918766	0.350717
0.0325	0.0240625	0.00438599	-0.0046875	0.00137685			0.00132231	2.21604	2.57301			0.344012	-0.915568	0.34654
-0.0234375	-0.0453125	0.0044365	-0.0059375	0.00138318			0.000684885	2.21664	2.58015			0.342324	-0.907146	0.342592
-0.0134375	-0.01625	0.00442202	-0.005	0.00137944			0.000924984	2.21651	2.58668			0.339983	-0.90101	0.339947
0.0003125	-0.0109375	0.00437677	-0.005	0.00136262			0.0013191	2.22018	2.59463			0.343585	-0.897289	0.335756
0.0034375	-0.204375	0.00437115	-0.005625	0.00134913			0.00153285	2.22389	2.5981			0.352656	-0.891479	0.331774
0.0125	-0.111875	0.00437279	-0.0046875	0.00134487			0.00161544	2.22796	2.60285			0.360658	-0.888411	0.327847
0.0125	-0.011875	0.00434847	-0.0059375	0.00134066			0.00100284	2.2291	2.60863			0.364437	-0.889194	0.324471
-0.0225	-0.12875	0.00431164	-0.006875	0.00134651			0.000839589	2.22835	2.61265			0.362611	-0.882993	0.320915
0.0028125	0.0253125	0.00427527	-0.0053125	0.00133259			0.000216615	2.23005	2.61594			0.362819	-0.872091	0.317226
-0.01625	0.0209375	0.00422372	-0.0040625	0.00133229			0.000385582	2.23142	2.62313			0.362305	-0.870132	0.315394
0.0034375	0.015625	0.00417594	-0.005	0.00131918			-0.000281003	2.23276	2.62516			0.36332	-0.869219	0.312304
0.031875	0.0021875	0.00420594	-0.005625	0.00133466			-0.00016896	2.23212	2.63065			0.360613	-0.864649	0.308682
0.00125	-0.0790625	0.00418838	-0.005	0.00131933			-0.000146045	2.22751	2.63671			0.358756	-0.858251	0.305271
0.0159375	0.0859375	0.00426229	-0.0053125	0.00131888			6.05144e-05	2.22273	2.64229			0.356314	-0.853486	0.301628
0.0146875	0.0409375	0.00421528	-0.0065625	0.00131719			-0.000702839	2.21912	2.64556			0.354954	-0.847937	0.298196
-0.0096875	0.02875	0.00418636	-0.0053125	0.00131051			-0.00117274	2.21592	2.6463			0.355002	-0.839973	0.294687
0.0025	-0.0884375	0.00427998	-0.005625	0.00129673			-0.00058942	2.2118	2.64823			0.354878	-0.839842	0.291063
0.0028125	-0.105312	0.00433494	-0.008125	0.00128344			-0.000220359	2.2063	2.65302			0.355278	-0.837101	0.287597
0.010625	0.043125	0.0043139	-0.0090625	0.00127812			-0.000389969	2.20029	2.65621			0.353289	-0.829071	0.284954
-0.0109375	0.036875	0.00432313	-0.0075	0.00127318			-0.00108693	2.19383	2.66075			0.352353	-0.820324	0.28135
-0.0121875	-0.0134375	0.0042788	-0.0071875	0.00126955			-0.000173763	2.1902	2.66215			0.350442	-0.817451	0.277828
0.0153125	-0.194063	0.00423283	-0.0078125	0.00126909			-0.000701799	2.18879	2.66478			0.346316	-0.814905	0.274631
-0.01375	0.160625	0.00420463	-0.008125	0.00126708			-1.96889e-06	2.18511	2.66838			0.34463	-0.8089	0.271287
0.04	-0.0278125	0.0041774	-0.0084375	0.00129134			-0.000770703	2.17811	2.67052			0.344748	-0.806615	0.268117
0.005625	-0.05375	0.00412644	-0.0090625	0.00128092			-0.00174229	2.17243	2.66952			0.34442	-0.802763	0.265188
-0.01125	0.0075	0.00407518	-0.0078125	0.00127626			-0.00189299	2.16707	2.67005			0.34562	-0.7916	0.261882
-0.01	-0.03	0.00407143	-0.00625	0.00127041			-0.00185174	2.16161	2.67285			0.34686	-0.788467	0.258983
-0.01875	0.013125	0.00408961	-0.0071875	0.00127338			-0.00221887	2.15583	2.67698			0.348299	-0.788989	0.256672
0.0246875	0.0021875	0.00411068	-0.0078125	0.00128224			-0.00176415	2.14759	2.68076			0.344911	-0.785856	0.25368
0.06125	-0.0021875	0.00408243	-0.00875	0.00132757			-0.00218162	2.13595	2.68221			0.342825	-0.776716	0.2507
-0.004375	0.0128125	0.00404359	-0.0075	0.00131545			-0.00173584	2.12468	2.68359			0.339566	-0.770711	0.248661
-0.0503125	-0.024375	0.00401274	-0.00875	0.00134942			-0.0020667	2.11586	2.68214			0.338391	-0.766598	0.245705
-0.0153125	-0.0003125	0.00399289	-0.008125	0.00134797			-0.00171392	2.10604	2.68562			0.333988	-0.759613	0.243118
-0.0428125	0.01125	0.00394891	-0.0078125	0.00137404			-0.00151482	2.09439	2.68949			0.333859	-0.755957	0.240314
0.0328125	-0.00625	0.00390017	-0.0096875	0.00138978			-0.00154675	2.08192	2.68701			0.334073	-0.754129	0.23755
-0.0178125	0.021875	0.00390547	-0.0109375	0.00139033			-0.00068251	2.06911	2.69007			0.333157	-0.747471	0.234531
-0.0046875	0.0078125	0.00394415	-0.009375	0.00137775			-0.000147608	2.05774	2.6889			0.329666	-0.737548	0.231701
0.0103125	0.0275	0.00396015	-0.00875	0.00137095			0.00015132	2.04879	2.68924			0.331224	-0.735394	0.228874
0.0165625	0.0259375	0.00391533	-0.0096875	0.00137048			-0.000579303	2.04064	2.68966			0.332899	-0.734284	0.226062
0.0103125	0.01375	0.00394076	-0.01	0.00136377			-0.000447396	2.0302	2.69105			0.334836	-0.728474	0.223288
0.005	-0.0303125	0.00389431	-0.0103125	0.00135183			-0.000237091	2.01649	2.69263			0.339561	-0.722403	0.220558
-0.02625	0.0146875	0.00387624	-0.0096875	0.00136128			-0.00106832	2.00408	2.69455			0.342478	-0.7194	0.218551
0.0134375	0.04125	0.00387715	-0.00875	0.00135781			-0.00141363	1.99312	2.69372			0.34225	-0.713068	0.216649
0.00875	0.0103125	0.00383055	-0.0078125	0.00134969			-0.000867336	1.98201	2.6943			0.337752	-0.705561	0.21523
0.0178125	-0.040625	0.00388641	-0.0084375	0.00135074			5.23385e-05	1.96939	2.69425			0.337077	-0.707258	0.213022
-0.0128125	0.03	0.00403719	-0.01	0.00134677			-0.000513136	1.95395	2.69675			0.337654	-0.7053	0.210532
0.0203125	0.0246875	0.00415235	-0.0090625	0.00135036			-0.000492101	1.93648	2.69462			0.337162	-0.694724	0.20787
-0.0109375	0.0190625	0.00413546	-0.00875	0.00134452			0.000548356	1.91924	2.69151			0.338185	-0.687674	0.205372
0.0078125	0.0334375	0.00410909	-0.00875	0.00133563			6.52191e-05	1.90453	2.69092			0.338059	-0.685128	0.203044
-0.03625	-0.00375	0.00410992	-0.00875	0.00135529			4.36704e-05	1.88993	2.68876			0.33793	-0.681015	0.200514
0.0359375	-0.0228125	0.00409418	-0.01	0.00137439			0.000629581	1.87145	2.68666			0.336703	-0.676054	0.198125
-0.005625	0.0128125	0.00407801	-0.010625	0.00136294			0.000631803	1.85365	2.68345			0.33336	-0.671093	0.195613
-0.0059375	0.031875	0.00402797	-0.01	0.00135195			0.00066632	1.83547	2.68326			0.332279	-0.666719	0.193118
-0.00375	-0.000625	0.00399481	-0.0090625	0.0013389			0.000137084	1.82011	2.6803			0.328977	-0.656013	0.190832
-0.0096875	0.01375	0.00395581	-0.0096875	0.00133196			0.000178514	1.80572	2.6789			0.327249	-0.653663	0.188626
0.0884375	-0.0290625	0.00393542	-0.01	0.00140385			-0.000254619	1.79217	2.67936			0.327576	-0.655164	0.186355
0.198437	0.0053125	0.00389935	-0.0090625	0.00158485			-0.00026142	1.77594	2.67639			0.325088	-0.650138	0.18412
-0.68	-0.0303125	0.00386216	-0.0096875	0.00224516			0.000833114	1.75761	2.67251			0.32072	-0.641521	0.181864
-0.267812	0.046875	0.00382106	-0.00875	0.00248508			0.000955941	1.74068	2.67117			0.317196	-0.637539	0.17957
0.417188	-0.122813	0.00378141	-0.0084375	0.0028714			0.000332295	1.72566	2.66793			0.31307	-0.633818	0.177382
0.2525	0.0728125	0.00374662	-0.0071875	0.00308823			-4.65689e-05	1.70934	2.66618			0.310434	-0.628726	0.175278
-0.921875	-0.0178125	0.00370133	-0.0065625	0.00397175			-0.000952509	1.69133	2.66614			0.309163	-0.624679	0.173184
0.975312	-0.0071875	0.00366472	-0.00875	0.00489772			-0.00125077	1.67038	2.66286			0.308573	-0.624091	0.171123
-0.732188	-0.0628125	0.00363076	-0.008125	0.00556907			-0.00162305	1.64859	2.66171			0.308446	-0.61691	0.168924
1.27813	0.0296875	0.00361347	-0.006875	0.00677801			-0.00193454	1.62831	2.65825			0.309535	-0.606139	0.166796
0.627187	0.0203125	0.00360015	-0.00625	0.007321			-0.00241608	1.60924	2.65537			0.312518	-0.604115	0.164639
0.948125	-0.0028125	0.00357293	-0.0071875	0.00817818			-0.00198739	1.58912	2.6514			0.314463	-0.603462	0.162502
1.12656	-0.0071875	0.00353729	-0.0075	0.00920316			-0.00214428	1.56768	2.64713			0.315727	-0.597979	0.160284
-0.857813	-0.0046875	0.00349585	-0.006875	0.00994664			-0.00237233	1.54588	2.64218			0.312095	-0.589884	0.158345
0.515625	-0.0190625	0.00348899	-0.0065625	0.0103387			-0.00156478	1.52428	2.63861			0.308169	-0.587273	0.156269
0.642812	0.0178125	0.00347971	-0.0065625	0.0108531			-0.0019778	1.50578	2.63943			0.303349	-0.579505	0.154333
-0.212812	0.005	0.0034543	-0.0046875	0.0109311			-0.00125904	1.48875	2.63259			0.301171	-0.574478	0.152205
0.0315625	0.0084375	0.00344982	-0.0046875	0.0108269			-0.0011741	1.47015	2.62672			0.301347	-0.576045	0.150282
-0.0275	-0.048125	0.00340697	-0.0053125	0.0107199			-0.000998637	1.4496	2.61803			0.298874	-0.573433	0.148363
0.167187	0.015	0.00339871	-0.0046875	0.0107539			-0.000522146	1.42938	2.61273			0.303499	-0.562923	0.14645
0.155937	-0.0178125	0.00335712	-0.001875	0.0107762			-0.000615659	1.40879	2.61107			0.307527	-0.557701	0.144516
-0.445312	-0.024375	0.00332166	-0.0021875	0.0110877			-0.0010928	1.39034	2.61083			0.308648	-0.557179	0.1427
-0.139687	0.0196875	0.0032829	-0.0015625	0.0110896			-0.00103378	1.37134	2.60364			0.308882	-0.553915	0.141167
-0.055625	0.02875	0.00328618	-0.000625	0.0110075			-0.00098319	1.34996	2.59685			0.312146	-0.549802	0.139436
1.28656	-0.0028125	0.0032663	0	0.0121573			-0.00150887	1.32541	2.58895			0.311516	-0.546146	0.137615
-0.872813	0.00375	0.00325479	-0.0003125	0.0128791			-0.00119226	1.30048	2.57966			0.307126	-0.539422	0.135919
-0.133437	0.01625	0.00321498	0.0015625	0.0128526			-0.000721827	1.27916	2.57017			0.305394	-0.529565	0.134239
0.635312	-0.02125	0.00321692	0.0034375	0.0133282			-0.000402682	1.25746	2.56233			0.308431	-0.528978	0.132603
-1.35594	-0.010625	0.00320477	0.0028125	0.0145186			-0.000362242	1.23435	2.55616			0.30935	-0.530348	0.131032
0.568438	0.024375	0.00317308	0.003125	0.0149067			0.000387242	1.20969	2.54841			0.309052	-0.523168	0.129337
0.0446875	0.0090625	0.00314992	0.005	0.0147662			-0.000103898	1.18548	2.54116			0.30774	-0.514812	0.127661
0.0409375	0.000625	0.00311704	0.00625	0.0146237			0.00029222	1.16229	2.5347			0.308426	-0.510242	0.126044
0.249375	-0.0284375	0.00307863	0.0065625	0.0146914			0.000302485	1.14315	2.52331			0.308402	-0.506652	0.124515
0.855937	0.0034375	0.0030582	0.008125	0.0153649			0.000572732	1.12394	2.51412			0.30885	-0.503257	0.123066
-1.155	0.0259375	0.00305521	0.01	0.016329			0.000567967	1.10234	2.50648			0.309279	-0.501168	0.121455
0.0103125	0.011875	0.00302476	0.0109375	0.0161365			0.000950354	1.07882	2.49649			0.309925	-0.499601	0.11998
-1.80687	0.014375	0.0029875	0.0121875	0.0177429			0.00108557	1.05738	2.49179			0.312637	-0.492029	0.118496
0.635938	0.0025	0.00298445	0.0159375	0.0181584			0.00131223	1.03566	2.48148			0.313914	-0.485044	0.117013
-0.0096875	-0.000625	0.00299581	0.0171875	0.0179425			0.00152146	1.01547	2.47135			0.313665	-0.485893	0.115524
-0.517812	-0.01	0.00296297	0.0175	0.0182375			0.00151568	0.993806	2.46017			0.312948	-0.484718	0.114081
-1.01625	0.04125	0.00294179	0.0196875	0.0190272			0.00198557	0.96935	2.44818			0.310986	-0.479495	0.112803
-0.0040625	0.010625	0.0029165	0.02125	0.0187949			0.00156847	0.942717	2.43828			0.31078	-0.474142	0.111392
-0.22125	-0.0075	0.00288495	0.0225	0.0187827			0.00142127	0.918555	2.42607			0.307438	-0.468724	0.10999
0.409687	0.0409375	0.00285193	0.025	0.018959			0.000699496	0.896232	2.41582			0.308014	-0.463044	0.108703
0.79125	0.0175	0.00282119	0.0275	0.0195148			0.000861695	0.872481	2.40576			0.306643	-0.458997	0.10733
0.563438	0.0440625	0.00278927	0.0278125	0.0198358			0.0013751	0.847158	2.39553			0.305361	-0.461347	0.105899
-0.516563	0.0253125	0.00276025	0.0278125	0.0201059			0.0011295	0.821555	2.38332			0.303237	-0.455929	0.104543
-0.0096875	0.0484375	0.00273502	0.0315625	0.0198659			0.00163805	0.796966	2.37346			0.303913	-0.445158	0.103201
0.0825	0.008125	0.00270667	0.03375	0.0197016			0.00121833	0.774201	2.36143			0.30124	-0.441437	0.102
-0.74625	-0.0171875	0.00269242	0.0346875	0.0202031			0.000733797	0.754378	2.35002			0.29926	-0.442481	0.100859
1.71063	0.006875	0.0026871	0.0365625	0.0216628			0.000727034	0.733848	2.33951			0.29837	-0.440327	0.0995317
-1.01625	-0.021875	0.00268028	0.0396875	0.0224099			0.00130291	0.710024	2.32647			0.297703	-0.435366	0.0983501
0.2025	0.0178125	0.00269386	0.0415625	0.022334			0.00137835	0.686995	2.31209			0.296996	-0.433407	0.097374
-1.46375	0.005	0.00267509	0.043125	0.0235203			0.00134126	0.665465	2.29863			0.300411	-0.428838	0.0961865
0.0565625	-0.0240625	0.00268811	0.0471875	0.0232847			0.00178407	0.643818	2.284			0.302322	-0.421135	0.0950288
-0.1	-0.015	0.00265784	0.050625	0.0230955			0.00174425	0.622774	2.26992			0.300581	-0.42133	0.093833
-1.825	0.021875	0.00266295	0.0503125	0.0246336			0.00124548	0.599347	2.25463			0.298134	-0.422897	0.092746
0.9	0.026875	0.00266581	0.051875	0.0252276			0.00146554	0.574155	2.24043			0.297811	-0.419372	0.0914978
0.50125	-0.02125	0.00263738	0.0559375	0.0254154			0.000935612	0.547258	2.22532			0.300786	-0.411604	0.0904198
1.00281	-0.0103125	0.00263274	0.0571875	0.0261025			0.000675457	0.522861	2.21104			0.299573	-0.407687	0.0891895
0.247812	0.019375	0.00265191	0.0584375	0.0260261			0.00113347	0.500728	2.19474			0.298918	-0.405402	0.0880679
-0.240938	-0.013125	0.00267272	0.061875	0.0259437			0.00123178	0.476243	2.17962			0.295395	-0.402399	0.0872011
2.13344	0.015	0.00264546	0.06375	0.0277549			0.00158284	0.450052	2.16502			0.293419	-0.401355	0.0862577
0.286563	0.0078125	0.00262384	0.064375	0.0276967			0.0024082	0.424801	2.15076			0.290285	-0.398221	0.0852682
-2.61125	-0.006875	0.00259469	0.0678125	0.0299639			0.00295165	0.400301	2.13482			0.289479	-0.389539	0.0841909
0.804375	-0.00875	0.00261652	0.07125	0.030396			0.00349836	0.378683	2.11852			0.286009	-0.385035	0.0830481
0.194063	0.0384375	0.00258558	0.0725	0.0302125			0.00347034	0.358992	2.10174			0.283575	-0.387776	0.08194
-1.03062	0.0196875	0.00256627	0.075	0.0308678			0.00416606	0.337874	2.08406			0.279621	-0.38758	0.0808905
0.815625	0.0125	0.00255283	0.076875	0.0313			0.00315238	0.313874	2.06846			0.280273	-0.3804	0.0799332
-1.91094	-0.0053125	0.00252737	0.0796875	0.0328221			0.00316098	0.290844	2.05141			0.282147	-0.377527	0.0789333
1.18625	-0.0065625	0.00254347	0.081875	0.0336007			0.00322794	0.269697	2.03525			0.280865	-0.376222	0.0780148
0.0771875	0.019375	0.00254438	0.0859375	0.0332605			0.00272384	0.249432	2.01836			0.28019	-0.372305	0.0769915
-1.38437	0.006875	0.00251371	0.0890625	0.0342317			0.00258769	0.227476	2.00144			0.278857	-0.370477	0.0760282
0.219688	-0.0090625	0.00250436	0.0903125	0.0340261			0.00202612	0.203138	1.98513			0.276714	-0.373023	0.0751042
-0.745938	-0.0021875	0.00249325	0.0915625	0.0343494			0.00237346	0.177182	1.96828			0.273231	-0.367931	0.0741495
1.14437	0.0109375	0.00247509	0.095625	0.0350671			0.00171605	0.151829	1.95118			0.270054	-0.360424	0.0732811
-1.09312	-0.005	0.00244934	0.098125	0.0357246			0.00184715	0.128725	1.9356			0.271419	-0.358204	0.072341
0.219375	0.02625	0.00245954	0.0996875	0.0355002			0.000784551	0.106137	1.91789			0.272795	-0.35827	0.0715021
-0.096875	-0.016875	0.00244399	0.101875	0.0351561			0.00180376	0.0816221	1.90028			0.272077	-0.356181	0.0704493
0.500625	-0.0009375	0.00241675	0.104062	0.03522			0.00226161	0.0565189	1.88277			0.269598	-0.351546	0.0695156
-1.00563	0.0203125	0.00241267	0.10625	0.0357881			0.00246288	0.0312246	1.86516			0.269336	-0.350371	0.0687161
-2.63531	0.023125	0.00238989	0.108438	0.0379788			0.00251467	0.00847441	1.84839			0.268568	-0.344822	0.0679598
-0.0375	0.019375	0.00237426	0.111875	0.0375445			0.00244269	-0.011364	1.83047			0.268654	-0.340056	0.0671169
0.0171875	0.01625	0.00234664	0.114375	0.0370953			0.00236082	-0.0313789	1.81519			0.269586	-0.340644	0.0663361
-1.23812	0.0153125	0.00232374	0.115938	0.0378727			0.00154658	-0.0523055	1.79748			0.2693	-0.342798	0.0656714
0.700312	0.025	0.002328	0.117812	0.0381025			0.000781688	-0.0751292	1.77944			0.268447	-0.338424	0.0648779
-1.745	0.0184375	0.00231346	0.122188	0.0393742			0.000377232	-0.0976441	1.76251			0.270225	-0.33033	0.0640176
-1.23094	0.024375	0.00233097	0.125	0.040116			0.000594989	-0.117821	1.74519			0.275828	-0.331831	0.0633336
0.088125	-0.0034375	0.00230358	0.128125	0.0397058			0.00112557	-0.137689	1.72799			0.27528	-0.329938	0.0625322
-0.31875	0.023125	0.00230871	0.13	0.0395313			0.000607556	-0.158703	1.7109			0.27492	-0.326935	0.0618195
-0.497187	0.0046875	0.00228472	0.1325	0.0395375			-0.000303426	-0.182998	1.69446			0.277185	-0.328437	0.0608864
1.44375	-0.003125	0.00227665	0.133125	0.0404901			-0.000367339	-0.207248	1.6777			0.275695	-0.325499	0.0601252
-0.0340625	-0.001875	0.00225743	0.13625	0.0400212			-0.000578986	-0.231513	1.66123			0.275938	-0.3176	0.0593381
0.565938	0.0009375	0.00224158	0.140625	0.0400899			-0.000177735	-0.252998	1.644			0.275437	-0.312378	0.0586576
1.85312	0.009375	0.00223186	0.14125	0.0414451			-0.000970452	-0.275778	1.62679			0.272096	-0.314858	0.0579575
-0.755	0.0171875	0.00223757	0.143125	0.0416852			-0.00162019	-0.299749	1.60912			0.270768	-0.315446	0.0571917
-2.71344	0.0075	0.00222196	0.145	0.0438808			-0.00106902	-0.323793	1.59156			0.266235	-0.308004	0.0564403
0.00375	0.0209375	0.00219467	0.147813	0.0433395			-0.00191839	-0.346367	1.57435			0.266756	-0.305262	0.0557354
-0.272812	0.018125	0.00221553	0.149375	0.0430739			-0.00258251	-0.367396	1.55831			0.268942	-0.303695	0.0551022
1.22531	0.0121875	0.00221333	0.1525	0.0437642			-0.00264582	-0.385411	1.5413			0.266259	-0.299387	0.0542899
-2.17906	0.0146875	0.00221583	0.155312	0.0453996			-0.00308004	-0.404117	1.52461			0.264621	-0.299321	0.0537257
0.814375	0.015	0.00220456	0.156563	0.04565			-0.00240146	-0.424764	1.50889			0.260618	-0.301867	0.0532142
-0.0984375	0.02625	0.00218248	0.158125	0.0451814			-0.00258476	-0.446441	1.49302			0.25918	-0.297233	0.0524467
-0.25	0.009375	0.00216318	0.162188	0.0448701			-0.00323214	-0.465632	1.47676			0.258443	-0.288224	0.0519773
-2.49844	0.0015625	0.00217194	0.165	0.0468112			-0.00290644	-0.484985	1.46012			0.255682	-0.289856	0.0512178
1.08781	0.024375	0.00216527	0.167187	0.0473175			-0.00321583	-0.503192	1.44339			0.254425	-0.2909	0.0506246
-0.035	0.00375	0.00215806	0.16875	0.0467647			-0.00309581	-0.522339	1.42636			0.255933	-0.28842	0.0499784
0.16375	-0.0165625	0.00216375	0.17125	0.0463475			-0.00326895	-0.545251	1.41041			0.255267	-0.285482	0.0494209
0.790937	-0.018125	0.00216	0.172813	0.0465627			-0.00357922	-0.568427	1.39438			0.257038	-0.28261	0.0487941
1.34	0.0103125	0.00216035	0.174375	0.0473243			-0.00345853	-0.58956	1.3788			0.256399	-0.278236	0.0484375
-0.753125	-0.008125	0.00214696	0.178438	0.0474896			-0.00359253	-0.608428	1.3627			0.255676	-0.273079	0.047744
-2.85219	0.0278125	0.00215935	0.179688	0.0497518			-0.00301609	-0.629531	1.34657			0.254846	-0.274384	0.0472199
-0.0878125	0.018125	0.00217909	0.18	0.0492216			-0.00359809	-0.651149	1.3308			0.255621	-0.275364	0.0466194
0.624375	0.018125	0.00217452	0.18125	0.0492345			-0.00373189	-0.672311	1.31565			0.256346	-0.268444	0.0460717
-2.41062	0.0046875	0.00215751	0.184687	0.0510336			-0.00436964	-0.692855	1.30048			0.257769	-0.264984	0.045507
2.86562	-0.0121875	0.00214352	0.185625	0.0532652			-0.00392284	-0.709781	1.28555			0.263004	-0.264331	0.0449391
-0.947812	-0.010625	0.00213345	0.1875	0.0535514			-0.00383483	-0.724826	1.27067			0.265089	-0.262046	0.0444564
-0.237188	0.0021875	0.00213539	0.19	0.0531233			-0.00385179	-0.740885	1.25543			0.263964	-0.260349	0.0439586
-0.9925	-0.0103125	0.00213605	0.190938	0.0534559			-0.00455039	-0.759885	1.24078			0.268384	-0.261133	0.0433815
0.693125	-0.024375	0.00212076	0.192188	0.053485			-0.00497095	-0.777356	1.22599			0.269773	-0.259305	0.0426868
-0.519063	0.020625	0.00211098	0.195937	0.0533397			-0.00514619	-0.792753	1.2114			0.271941	-0.251275	0.042181
0.450312	0.025	0.00209601	0.199062	0.0531274			-0.00501989	-0.808915	1.19709			0.270656	-0.251602	0.0417003
-1.16375	0.02125	0.00207841	0.199375	0.0536312			-0.00447266	-0.823753	1.1829			0.27074	-0.253691	0.0411738
-0.688125	-0.0184375	0.00208978	0.200312	0.0536531			-0.0039761	-0.841488	1.16928			0.269695	-0.252124	0.0406377
-0.100313	0.00875	0.00206507	0.2025	0.0530869			-0.00412368	-0.861018	1.15533			0.267116	-0.246967	0.0402849
-1.03062	-0.00125	0.00204942	0.204063	0.0534581			-0.00471962	-0.880209	1.1416			0.267421	-0.243572	0.0397682
0.19375	-0.0046875	0.00203302	0.204688	0.0529878			-0.00578376	-0.896136	1.12812			0.264959	-0.240896	0.0392737
1.75563	0.02125	0.00202027	0.207188	0.0540852			-0.00608126	-0.911768	1.11523			0.266309	-0.236718	0.0387872
2.73625	-0.045	0.00202611	0.20875	0.0561496			-0.00533615	-0.929754	1.10197			0.265849	-0.23737	0.0382476
-1.02406	0.0190625	0.00201469	0.209063	0.0564761			-0.00484965	-0.946313	1.08876			0.263348	-0.238284	0.0378114
-1.50344	0.0096875	0.00199466	0.21	0.057278			-0.00462775	-0.963681	1.07554			0.261059	-0.233519	0.0373304
0.694062	0.0284375	0.00199051	0.212187	0.0572605			-0.00498426	-0.979019	1.06241			0.257508	-0.226012	0.0367969
0.767187	-0.0378125	0.00199172	0.21375	0.0573164			-0.00496924	-0.991254	1.04946			0.254694	-0.226795	0.0363111
-2.05687	-0.00625	0.00197698	0.213437	0.0586613			-0.00434338	-1.00143	1.03665			0.255311	-0.228688	0.0357898
-0.53125	-0.01625	0.00196148	0.21625	0.0584639			-0.00466416	-1.01418	1.0241			0.256125	-0.223988	0.035241
0.033125	0.00625	0.00194837	0.216562	0.0577707			-0.00460003	-1.0294	1.01178			0.258295	-0.221834	0.0347584
0.025625	0.01875	0.00194104	0.217187	0.0570787			-0.00486222	-1.04212	0.999661			0.259731	-0.222356	0.034205
0.223125	-0.0103125	0.00195068	0.219063	0.0565928			-0.00418766	-1.05278	0.987573			0.259015	-0.216872	0.0336489
-0.450312	-0.0075	0.00195457	0.221563	0.0563401			-0.00408481	-1.0635	0.975457			0.256934	-0.214653	0.0330754
0.402187	-0.0071875	0.00194248	0.222188	0.0560424			-0.00382933	-1.07549	0.963548			0.255305	-0.216546	0.0327714
-0.100625	0.00125	0.00193428	0.22125	0.0554469			-0.00401798	-1.08799	0.951726			0.253281	-0.217329	0.0322018
-0.316875	-0.0046875	0.00191994	0.223125	0.055075			-0.00408962	-1.10315	0.940033			0.251394	-0.209169	0.0318021
0.499063	0.00375	0.00189609	0.225	0.0548899			-0.00446434	-1.11658	0.92855			0.25034	-0.203229	0.0314812
-0.02125	0.0084375	0.00188598	0.225313	0.0542293			-0.00442501	-1.12767	0.917014			0.247328	-0.204469	0.0310518
0.019375	-0.00375	0.0018638	0.22625	0.053575			-0.00421378	-1.13977	0.906042			0.245768	-0.203947	0.0307538
-2.47281	0.015625	0.0018419	0.225938	0.0553823			-0.00473703	-1.15167	0.894951			0.246506	-0.200683	0.0302935
2.02844	0.0175	0.0018362	0.225938	0.0567228			-0.00456194	-1.16442	0.883994			0.245998	-0.201466	0.0299426
-3.39875	0.005	0.00183121	0.22625	0.0594169			-0.00485462	-1.17629	0.873171			0.252113	-0.197158	0.0296545
0.434687	-0.030625	0.00182971	0.227812	0.0591135			-0.00472578	-1.1853	0.862538			0.25281	-0.188737	0.0293637
2.04594	-0.0096875	0.00182667	0.228125	0.0604251			-0.00469012	-1.19165	0.851917			0.257488	-0.190042	0.0291987
0.399375	0.02125	0.0018146	0.228125	0.0600739			-0.00474572	-1.19836	0.841492			0.259949	-0.193698	0.0287118
0.365938	-0.0040625	0.00179206	0.22875	0.0596936			-0.00516078	-1.20705	0.831191			0.263742	-0.191217	0.0283847
0.475	0.0140625	0.00177449	0.229062	0.059427			-0.0042378	-1.21581	0.821237			0.263758	-0.185538	0.0279541
1.94062	-0.0009375	0.00175776	0.229687	0.0606295			-0.00505088	-1.22251	0.811078			0.264368	-0.184493	0.0276046
-0.474063	0.01125	0.00174748	0.23	0.0603504			-0.0042647	-1.22836	0.80135			0.26235	-0.182339	0.0272192
0.751875	0.02125	0.00174328	0.230937	0.0603526			-0.00444794	-1.23408	0.791502			0.260747	-0.180381	0.0268365
0.741562	-0.0071875	0.00172412	0.230937	0.0603444			-0.00395169	-1.24154	0.781988			0.262115	-0.182013	0.0265138
-0.625	0.0159375	0.00172427	0.23	0.0602198			-0.00444049	-1.25107	0.772409			0.259538	-0.182731	0.0261873
0.373125	0.0190625	0.00170535	0.229687	0.0598449			-0.00469003	-1.26027	0.763213			0.256046	-0.175615	0.0258423
0.106563	0.0021875	0.00169791	0.230625	0.059208			-0.00423156	-1.26784	0.753897			0.254617	-0.169936	0.0255266
0.0709375	0.0359375	0.0016837	0.23	0.0585435			-0.00497546	-1.27412	0.744721			0.252447	-0.171242	0.0250879
3.10719	-0.02	0.00168184	0.228125	0.0609234			-0.00390471	-1.28007	0.735603			0.25206	-0.173592	0.0247493
1.03	-0.00125	0.00166689	0.22875	0.0611966			-0.00337518	-1.28807	0.726512			0.255026	-0.1685	0.0244577
0.729375	0.028125	0.00165524	0.228437	0.0611658			-0.0031262	-1.29587	0.717811			0.256386	-0.166802	0.0241348
1.14469	0.0134375	0.00165687	0.227812	0.0615507			-0.00273717	-1.30193	0.709001			0.258328	-0.164322	0.0239789
-0.291875	0.05	0.00164191	0.227187	0.0610779			-0.00283473	-1.30501	0.700304			0.257902	-0.158773	0.0235551
0.5625	0.0090625	0.00164339	0.2275	0.0608817			-0.0029734	-1.30614	0.691686			0.257543	-0.158577	0.0230815
0.0621875	-0.026875	0.00162454	0.226562	0.0601876			-0.00232076	-1.30826	0.683188			0.254783	-0.161449	0.0227424
-0.183125	0.0175	0.00162842	0.225625	0.0596231			-0.00285445	-1.31292	0.675049			0.253916	-0.161972	0.0223746
0.0825	-0.01875	0.00160976	0.225625	0.0589649			-0.00366856	-1.31537	0.666682			0.256339	-0.154921	0.0221305
-1.51437	0.0046875	0.00160726	0.225938	0.0597468			-0.00300806	-1.31732	0.658431			0.255245	-0.153812	0.0219145
-0.274375	0.024375	0.00158917	0.225	0.059279			-0.00221263	-1.31851	0.650238			0.253316	-0.154987	0.021544
0.525312	0.01125	0.00157287	0.22375	0.059068			-0.00254218	-1.31901	0.642226			0.253243	-0.154595	0.0213169
-1.39625	0.0196875	0.00155426	0.223438	0.0597305			-0.00298693	-1.32235	0.634327			0.253355	-0.154791	0.0210495
-1.34844	0.0065625	0.00154902	0.222188	0.0603369			-0.00322375	-1.32779	0.62656			0.253708	-0.151723	0.0207404
0.461875	-0.015	0.00154634	0.220625	0.0600493			-0.00312056	-1.33211	0.618763			0.251656	-0.150156	0.020517
0.190313	0.0125	0.00153744	0.220625	0.0594936			-0.00242377	-1.33449	0.61145			0.249806	-0.142714	0.0203156
-1.57625	0.01	0.00152959	0.220313	0.0603308			-0.00288538	-1.33577	0.60396			0.249752	-0.145195	0.0200718
0.13375	0.0009375	0.00153091	0.218125	0.0597152			-0.00270328	-1.33789	0.596515			0.247154	-0.147741	0.0197434
0.370313	0.016875	0.00152939	0.215937	0.0593437			-0.00249805	-1.34104	0.589133			0.247175	-0.145195	0.0195506
0.4925	0.0034375	0.00152039	0.215	0.059099			-0.00251084	-1.34418	0.581924			0.248677	-0.141017	0.0192933
-0.883125	0.0246875	0.00150744	0.214687	0.059248			-0.00296213	-1.34558	0.574891			0.252255	-0.141017	0.0190422
-0.378437	-0.0065625	0.00149528	0.214062	0.0588904			-0.0032716	-1.34304	0.567842			0.252909	-0.138667	0.0188988
-0.139062	-0.019375	0.00149139	0.212812	0.0582979			-0.00361417	-1.33886	0.561011			0.253801	-0.136643	0.0185562
0.660312	0.0228125	0.00149349	0.210938	0.0582341			-0.00366312	-1.33807	0.554223			0.252683	-0.138732	0.0182376
0.440625	0.0403125	0.00148337	0.21	0.0579513			-0.00442101	-1.33835	0.547433			0.252689	-0.139711	0.0179009
-0.060625	-0.0109375	0.00147151	0.209063	0.057292			-0.00434219	-1.33648	0.540711			0.251438	-0.135076	0.0176269
0.472813	0.0034375	0.00148198	0.209063	0.0570532			-0.00451678	-1.33412	0.5341			0.251863	-0.130376	0.0175014
-0.355312	0.01375	0.00149076	0.208438	0.0566997			-0.00438213	-1.33154	0.527551			0.254746	-0.134619	0.0172928
0.307813	0.0253125	0.00152318	0.205313	0.0563032			-0.00428918	-1.32898	0.521012			0.254214	-0.136578	0.0172025
1.93687	0.01375	0.00151832	0.204375	0.0575407			-0.00389263	-1.32793	0.514665			0.252056	-0.133314	0.016909
-0.934375	0.02	0.00150133	0.20375	0.0577603			-0.00429674	-1.33032	0.508441			0.250909	-0.132987	0.0167231
0.752187	0.030625	0.00149581	0.20125	0.057795			-0.00463504	-1.32945	0.502271			0.249027	-0.13129	0.0165313
0.07875	-0.0228125	0.00147879	0.200625	0.0571558			-0.00479367	-1.32614	0.496062			0.247668	-0.12548	0.0162481
0.08125	0.0034375	0.00146292	0.199375	0.056527			-0.00449859	-1.32526	0.490022			0.244529	-0.126068	0.0158832
-0.35375	0.0303125	0.00146662	0.196875	0.0561786			-0.00452501	-1.32502	0.483931			0.241757	-0.129984	0.0156756
0.03875	0.005	0.00145247	0.19375	0.0555195			-0.004134	-1.32337	0.478075			0.238951	-0.128875	0.0154244
0.0690625	-0.0090625	0.00145474	0.193125	0.0548989			-0.00556018	-1.32271	0.472251			0.237754	-0.122151	0.0153436
-0.488125	0.0240625	0.00146167	0.1925	0.054705			-0.00520248	-1.31939	0.466563			0.241423	-0.120453	0.0151675
0.270312	0.018125	0.0014657	0.190625	0.0542958			-0.00502238	-1.31301	0.460884			0.241908	-0.123717	0.0150448
-1.30219	0.0203125	0.00147624	0.18875	0.0549235			-0.0054063	-1.30629	0.455135			0.244347	-0.12313	0.0147412
-1.00812	0.0171875	0.0014654	0.1875	0.0552493			-0.00480041	-1.30273	0.449539			0.247135	-0.121759	0.0145708
-1.9075	0.0021875	0.0014672	0.185625	0.0564705			-0.00431363	-1.29904	0.444157			0.248976	-0.123522	0.0144672
0.284687	-0.015	0.00147491	0.183437	0.0560537			-0.00449934	-1.2938	0.438674			0.249903	-0.118821	0.0142911
0.040625	0.02125	0.0014794	0.184375	0.055398			-0.00479587	-1.28771	0.433304			0.250887	-0.114774	0.0141152
1.26531	-0.000625	0.00147102	0.1825	0.0559752			-0.00434146	-1.28164	0.428126			0.249057	-0.119344	0.0139679
0.635625	0.0140625	0.00148181	0.179375	0.0559155			-0.0044391	-1.27668	0.422877			0.246967	-0.121694	0.0139267
-0.0240625	0.00625	0.00147059	0.1775	0.0552449			-0.00387908	-1.2743	0.41775			0.243816	-0.117385	0.0139044
-0.686562	-0.0121875	0.00145389	0.17625	0.0552452			-0.00376236	-1.27304	0.412677			0.240571	-0.114578	0.0137999
-0.230312	0.0140625	0.00146051	0.175	0.0547893			-0.00394568	-1.26974	0.407612			0.238206	-0.114709	0.0136465
-0.684375	-0.0325	0.00144831	0.173438	0.0547931			-0.00399898	-1.26365	0.402648			0.236326	-0.112032	0.0134697
-0.985	-0.0096875	0.00146469	0.171562	0.0550974			-0.00365606	-1.25962	0.397664			0.234103	-0.110661	0.0133354
1.06594	0.0153125	0.00145743	0.168437	0.0554789			-0.00394152	-1.2569	0.392677			0.23131	-0.113468	0.0132014
0.0353125	-0.0075	0.0014762	0.165312	0.0548251			-0.0039487	-1.25346	0.387813			0.230495	-0.112032	0.0130826
-1.68094	-0.0090625	0.00148599	0.16375	0.0558249			-0.00312696	-1.24936	0.382959			0.228584	-0.106027	0.0130083
-0.611562	-0.005625	0.00147972	0.162813	0.055743			-0.00252321	-1.24232	0.378173			0.22671	-0.103872	0.0127033
0.080625	0.0203125	0.00147759	0.161563	0.0551312			-0.00309517	-1.23321	0.373487			0.227958	-0.10694	0.0125668
1.21438	-0.005	0.00146861	0.15875	0.0556607			-0.00290893	-1.22554	0.368786			0.227393	-0.108899	0.0125173
1.07438	0.0015625	0.00146255	0.155937	0.0560437			-0.00290122	-1.22009	0.364169			0.225883	-0.106092	0.0123336
-0.155	-0.0009375	0.00147938	0.155312	0.0555025			-0.00232183	-1.21427	0.359618			0.225897	-0.105308	0.0121763
0.999375	0.006875	0.0014757	0.15375	0.0558124			-0.00356735	-1.20627	0.355171			0.22832	-0.103481	0.0121249
-1.80375	0.0475	0.00148518	0.15375	0.0569228			-0.00322518	-1.19739	0.350784			0.228677	-0.102567	0.0120096
-0.081875	0.0046875	0.00147173	0.150937	0.0562976			-0.00271409	-1.18915	0.346441			0.229969	-0.102371	0.0119188
0.0334375	-0.001875	0.00146251	0.1475	0.0556317			-0.00311284	-1.18458	0.342121			0.23383	-0.106157	0.0117361
0.0596875	-0.0065625	0.00145028	0.145625	0.0550003			-0.00347508	-1.18039	0.337891			0.234505	-0.104982	0.0115413
0.0825	0.0190625	0.00143976	0.144063	0.0543996			-0.00296936	-1.17756	0.333716			0.233097	-0.0979318	0.0114823
0.257187	0.039375	0.00142188	0.1425	0.053981			-0.00259228	-1.17143	0.329541			0.233272	-0.0964303	0.0111862
-3.07594	0.0190625	0.00143421	0.140312	0.0563864			-0.00289096	-1.16406	0.325466			0.232255	-0.0983234	0.0110239
-1.03594	-0.0103125	0.00145734	0.138125	0.0567219			-0.00373924	-1.15884	0.321367			0.233789	-0.0982582	0.010895
0.682187	0.014375	0.00145798	0.135	0.0566995			-0.00440845	-1.15434	0.317374			0.233825	-0.0974748	0.010696
0.638125	-0.023125	0.00145175	0.132188	0.0566333			-0.00405582	-1.15006	0.31345			0.231555	-0.0966914	0.0105522
-0.367813	0.00625	0.00146371	0.131875	0.0562976			-0.00356444	-1.14373	0.309574			0.230809	-0.0913385	0.0105361
0.737813	-0.016875	0.00147428	0.129688	0.056336			-0.00331234	-1.13405	0.305777			0.234213	-0.0883356	0.0102932
0.85	-0.0159375	0.0014619	0.127813	0.0564862			-0.00363054	-1.12365	0.301986			0.235122	-0.0929052	0.0101172
0.192188	0.0225	0.00149562	0.125	0.0559767			-0.00371469	-1.11564	0.298257			0.234273	-0.0955817	0.0100779
-0.129375	0.00625	0.00150423	0.1225	0.0554108			-0.00382857	-1.10946	0.294567			0.232732	-0.0903592	0.00985653
0.0646875	-0.020625	0.00149492	0.121563	0.0547871			-0.00421886	-1.10215	0.29091			0.233772	-0.0879439	0.00970249
-1.29094	-0.0134375	0.00151697	0.120312	0.0553975			-0.00388244	-1.09258	0.287339			0.239468	-0.0892495	0.00957293
0.199687	0.0346875	0.00150625	0.119062	0.054909			-0.00389266	-1.08298	0.283794			0.239379	-0.0885967	0.0094302
0.701875	0.0128125	0.00151317	0.116563	0.0549288			-0.00387274	-1.07534	0.280329			0.240832	-0.0878786	0.00937586
-0.52125	-0.010625	0.00152687	0.114375	0.0547677			-0.00354216	-1.06923	0.276899			0.240907	-0.091469	0.00935383
-0.065	-0.00125	0.00152759	0.111875	0.0541524			-0.00387598	-1.06523	0.273489			0.240735	-0.0894453	0.00919904
0.0540625	-0.02625	0.0015508	0.109375	0.0535337			-0.00464046	-1.05936	0.270126			0.241101	-0.0820034	0.00906095
0.0440625	0.0034375	0.00154904	0.10875	0.0529128			-0.00512609	-1.05187	0.266795			0.237907	-0.079131	0.00894325
-0.0465625	0.00375	0.00154979	0.106875	0.0523021			-0.00525323	-1.04562	0.263581			0.235941	-0.0835701	0.00875233
-0.635625	0.006875	0.00153179	0.103437	0.052288			-0.00481854	-1.03998	0.26043			0.234557	-0.0835048	0.00848001
-0.783437	0.0284375	0.0015212	0.10125	0.0524219			-0.00561979	-1.03499	0.257175			0.23374	-0.0796533	0.00838898
-0.0715625	-0.025	0.00152824	0.0996875	0.0518423			-0.00497584	-1.02959	0.254127			0.233021	-0.0796533	0.0082249
0.0296875	-0.01625	0.00152113	0.0978125	0.0512279			-0.00480702	-1.02095	0.251046			0.233241	-0.0774337	0.00809295
0.230937	0.0234375	0.00151505	0.0965625	0.0508225			-0.00516437	-1.0102	0.247937			0.232939	-0.0741045	0.00789547
-0.367188	0.0253125	0.00150248	0.0946875	0.0505584			-0.00486546	-1.00111	0.244858			0.232217	-0.0760629	0.00761305
-1.90625	0.0059375	0.00153757	0.0925	0.0518366			-0.00481191	-0.992857	0.241847			0.233991	-0.0811547	0.00740053
0.0275	0.0103125	0.00152815	0.09	0.0512202			-0.0050553	-0.985813	0.238823			0.234844	-0.0766504	0.00728479
-0.38625	0.0009375	0.00151261	0.0890625	0.0509701			-0.00515947	-0.977372	0.235849			0.237135	-0.0714932	0.00706597
-0.209688	-0.0040625	0.00151007	0.0884375	0.0505467			-0.00453046	-0.968122	0.233002			0.237509	-0.0732558	0.00694893
0.0896875	0.00625	0.00151943	0.08625	0.0500085			-0.00432023	-0.958445	0.230138			0.238547	-0.0749531	0.00684943
-0.110625	0.00625	0.0015265	0.084375	0.0494979			-0.00477829	-0.950828	0.227253			0.238541	-0.0733211	0.0067815
0.203125	0.0128125	0.00151972	0.083125	0.0490861			-0.00511599	-0.946019	0.224418			0.240264	-0.0722113	0.00667319
-1.26188	0.0375	0.00154928	0.0803125	0.0497382			-0.00518631	-0.941239	0.221647			0.243718	-0.0713627	0.00662664
0.119062	0.0096875	0.00159879	0.07875	0.0492394			-0.0057044	-0.935313	0.21888			0.241147	-0.0662708	0.00648343
-0.225938	-0.013125	0.00163549	0.0778125	0.0488537			-0.00613603	-0.927813	0.216168			0.240548	-0.0634638	0.0065064
0.1975	0.0178125	0.00163048	0.075625	0.0484443			-0.00617906	-0.921607	0.213539			0.237979	-0.0690779	0.00640306
0.108125	0.02375	0.00164148	0.0725	0.0479507			-0.00600837	-0.916371	0.210897			0.243265	-0.0687515	0.00628363
-0.018125	0.006875	0.0016414	0.0696875	0.0473732			-0.00551736	-0.91168	0.20836			0.244598	-0.0625498	0.00611615
-0.0134375	-0.046875	0.00163601	0.0696875	0.0467981			-0.00480157	-0.905151	0.205795			0.247557	-0.0603956	0.00593363
0.0590625	0.01375	0.00162913	0.066875	0.0462758			-0.00470418	-0.896548	0.203248			0.245577	-0.0613095	0.00586437
-0.005625	-0.0134375	0.00161545	0.0653125	0.0457066			-0.00459414	-0.885915	0.200752			0.246013	-0.0598733	0.00569328
0.0221875	0.0215625	0.00163413	0.06375	0.045161			-0.00489796	-0.876812	0.198269			0.244808	-0.0609178	0.00553391
-0.00625	0.025	0.00163696	0.0615625	0.0446063			-0.00536885	-0.870327	0.195908			0.245766	-0.0642471	0.00543591
0.0090625	0.0178125	0.00163444	0.0590625	0.0440612			-0.00508048	-0.863459	0.193496			0.24565	-0.0599386	0.00534534
0.0265625	0.0215625	0.00163038	0.05875	0.0435405			-0.00479723	-0.854636	0.191164			0.247366	-0.0547815	0.00526628
0.0021875	-0.045	0.00167419	0.0584375	0.0430018			-0.0039942	-0.845238	0.188837			0.244955	-0.0560218	0.00526496
0.01	0.105312	0.00174308	0.055625	0.0424776			-0.00454327	-0.836532	0.186491			0.242502	-0.0608526	0.00520686
0.018125	-0.163125	0.00181143	0.0528125	0.0419681			-0.00551262	-0.829871	0.184241			0.239864	-0.0604609	0.0050136
-0.008125	0.046875	0.0018383	0.0515625	0.0414549			-0.00609516	-0.826665	0.18201			0.239374	-0.0553037	0.00499156
-0.001875	0.134375	0.00185359	0.0496875	0.0409418			-0.00613022	-0.8224	0.179824			0.241322	-0.0545856	0.00488447
-0.0128125	-0.364062	0.00184369	0.0471875	0.040446			-0.00580931	-0.815429	0.177632			0.241462	-0.0529536	0.00467472
-0.01	0.083125	0.00184141	0.04625	0.0399536			-0.00444885	-0.808356	0.17545			0.241106	-0.0484493	0.00456068
0.0196875	-0.011875	0.00184917	0.0440625	0.0394769			-0.00446357	-0.803488	0.173371			0.242086	-0.0528884	0.00450588
0.0084375	0.085	0.00186432	0.04125	0.038995			-0.00456585	-0.799297	0.171234			0.247738	-0.053737	0.00464134
0.0325	-0.0184375	0.00185429	0.0390625	0.0385431			-0.00441674	-0.794164	0.169181			0.249459	-0.0487757	0.00455909
0.0046875	0.0175	0.001855	0.0375	0.038069			-0.00500751	-0.788091	0.167127			0.253867	-0.0436186	0.00446023
0.0146875	0.0009375	0.00184758	0.0365625	0.0376108			-0.00518152	-0.77887	0.165091			0.254645	-0.0474701	0.00431047
0.019375	0.034375	0.00183557	0.033125	0.0371629			-0.00465537	-0.768355	0.163118			0.254883	-0.0497549	0.0043231
0.0096875	-0.03875	0.00185214	0.031875	0.036711			-0.00558486	-0.761047	0.161104			0.255565	-0.046752	0.00438847
0.08	0.0278125	0.0018582	0.0303125	0.0363349			-0.00587868	-0.755502	0.159133			0.253387	-0.0476659	0.00436434
0.0175	0.016875	0.00184043	0.0278125	0.0359011			-0.00671833	-0.74787	0.157267			0.250146	-0.0476659	0.00428528
-0.026875	0.0140625	0.00182038	0.0265625	0.035482			-0.00632623	-0.739223	0.155484			0.24714	-0.0436186	0.00445745
0.00625	-0.001875	0.00181589	0.0265625	0.0350475			-0.00588437	-0.731223	0.153512			0.247376	-0.0445325	0.00433755
-0.0140625	-0.0028125	0.00180646	0.0240625	0.0346262			-0.00604903	-0.723532	0.151654			0.246287	-0.0496896	0.00441545
-0.011875	0.0209375	0.00180527	0.021875	0.0342079			-0.0058992	-0.718473	0.14981			0.246222	-0.0491021	0.00428258
-0.0215625	0.0409375	0.00180159	0.0196875	0.0338045			-0.0050717	-0.715737	0.147965			0.246295	-0.0429005	0.00416511
0.0378125	0.0146875	0.0018064	0.018125	0.0334224			-0.00365114	-0.711517	0.146154			0.246531	-0.0436186	0.00408671
0.01625	-0.0109375	0.00180021	0.015625	0.0330235			-0.00310244	-0.704576	0.144366			0.243136	-0.0438144	0.00407411
0.034375	0.13875	0.00178535	0.0146875	0.0326476			-0.00350637	-0.698767	0.142576			0.240979	-0.0420518	0.00400668
0.0146875	-0.163125	0.00176973	0.0128125	0.0322568			-0.0042131	-0.694193	0.14082			0.238808	-0.043488	0.00398782
-0.003125	0.0709375	0.00180806	0.0103125	0.0318592			-0.00442392	-0.690355	0.139062			0.235611	-0.0449894	0.00393339
0.001875	-0.023125	0.00197154	0.0078125	0.0314653			-0.00432506	-0.685855	0.137335			0.234767	-0.0412032	0.00384127
-0.0140625	0.0078125	0.00195205	0.0071875	0.0310885			-0.00401734	-0.67909	0.135628			0.235717	-0.0340876	0.00367819
-0.0371875	-0.06	0.00198842	0.0053125	0.0307395			-0.00393276	-0.670605	0.133954			0.238718	-0.0393101	0.00367456
-0.0034375	0.0503125	0.00207997	0.003125	0.0303611			-0.00376151	-0.661031	0.132304			0.239314	-0.0429005	0.00359265
0.018125	-0.013125	0.00210351	0.00125	0.0300021			-0.00318681	-0.654707	0.130732			0.240085	-0.041399	0.00356051
0.0290625	-0.0003125	0.00212113	0	0.0296584			-0.00360354	-0.649369	0.129144			0.243448	-0.0397017	0.00351451
0.0225	-0.005	0.00227853	-0.0015625	0.0293125			-0.00411745	-0.64259	0.127575			0.24224	-0.0404851	0.00354973
-0.01625	0.00625	0.00227429	-0.00375	0.0289646			-0.00391235	-0.633869	0.125996			0.241177	-0.0400934	0.00360267
0.0071875	-0.046875	0.00229822	-0.004375	0.028612			-0.00371518	-0.626104	0.124448			0.240609	-0.0400281	0.00369955
0.005625	0.0053125	0.00227718	-0.00625	0.0282622			-0.00296868	-0.620266	0.123002			0.237981	-0.043488	0.00370421
0.0140625	0.038125	0.00225233	-0.0096875	0.0279252			-0.0028348	-0.616663	0.121473			0.236196	-0.0452506	0.00360404
0.0071875	0.0028125	0.00223528	-0.0109375	0.0275855			-0.00244939	-0.613545	0.120022			0.236666	-0.0385267	0.00361637
0.0221875	0.015625	0.00221158	-0.011875	0.027265			-0.00317541	-0.608766	0.118656			0.238884	-0.0361113	0.00354452
0.0303125	-0.0003125	0.00221223	-0.0140625	0.0269566			-0.00401477	-0.603854	0.117268			0.236205	-0.0393753	0.00344425
-0.02625	-0.0084375	0.00222694	-0.01625	0.026648			-0.00388559	-0.59781	0.115859			0.234865	-0.0387878	0.00343497
-0.013125	-0.0028125	0.00225521	-0.01875	0.0263301			-0.00405431	-0.594575	0.114429			0.234676	-0.0358502	0.00344109
0.0040625	0.0065625	0.00255345	-0.020625	0.0260071			-0.00313737	-0.59103	0.113139			0.234568	-0.0388531	0.0033027
0.0025	0.030625	0.00270985	-0.0225	0.0256865			-0.00263508	-0.586795	0.111677			0.232066	-0.0376128	0.00322256
0.0096875	0.0625	0.00270525	-0.02375	0.0253771			-0.0020105	-0.579619	0.110365			0.231458	-0.0328473	0.00329201
0.006875	-0.015625	0.00270852	-0.025	0.0250688			-0.00192392	-0.570898	0.108989			0.229798	-0.0343487	0.00309841
0.013125	-0.0859375	0.00274831	-0.0265625	0.0247705			-0.00273112	-0.563427	0.10767			0.231465	-0.0413337	0.0029552
0.025625	0.187187	0.00274824	-0.02875	0.0244884			-0.00302037	-0.557913	0.106343			0.229784	-0.0397017	0.00297817
0.00125	-0.005	0.00273097	-0.0296875	0.0241855			-0.00311287	-0.551736	0.105053			0.227335	-0.0340876	0.0030045
-0.014375	-0.02125	0.0027033	-0.0303125	0.0238994			-0.00289485	-0.545368	0.103856			0.228664	-0.0350668	0.00313501
-0.01375	0.0021875	0.00267909	-0.0315625	0.0236163			-0.00166602	-0.536927	0.10262			0.233246	-0.0375475	0.00338422
0.005625	0.001875	0.00266269	-0.0334375	0.0233285			-0.00139287	-0.530383	0.101411			0.237135	-0.0364377	0.00341329
-0.015	-0.0225	0.00263024	-0.034375	0.0230537			-0.00154098	-0.525971	0.100193			0.237587	-0.0386572	0.00350371
-0.016875	0.0096875	0.00262288	-0.0365625	0.0227842			-0.00211514	-0.523589	0.0989757			0.236551	-0.0401587	0.00352584
-0.0025	0.0053125	0.00260561	-0.0384375	0.0225037			-0.0014547	-0.520633	0.0977418			0.236505	-0.034414	0.00344811
0.003125	0.0221875	0.00258574	-0.03875	0.0222273			-0.0015451	-0.515177	0.0964124			0.235886	-0.0309542	0.00344992
0.035	-0.0025	0.00257206	-0.0396875	0.0219862			-0.00195067	-0.510692	0.0952193			0.235192	-0.0345446	0.00327019
-0.0225	0.0084375	0.00256104	-0.0425	0.0217356			-0.00271597	-0.506927	0.0939609			0.235255	-0.0363072	0.00331389
0.0040625	0.02	0.00255954	-0.0440625	0.0214696			-0.00149244	-0.50353	0.0927155			0.238511	-0.0335001	0.00330207
0.030625	0.009375	0.00254431	-0.045	0.0212335			-0.00128993	-0.500765	0.091534			0.238294	-0.0317375	0.00336509
-0.0028125	-0.025625	0.00252958	-0.04625	0.0209726			-0.00133313	-0.49628	0.0903791			0.239493	-0.0316723	0.00327276
0.0115625	0.0025	0.00250315	-0.046875	0.0207236			-0.0014512	-0.488221	0.0892534			0.24323	-0.0297791	0.00322229
-0.03125	-0.0053125	0.00250831	-0.0484375	0.0204974			-0.00197491	-0.480353	0.0881126			0.246999	-0.0310847	0.00314315
-0.0203125	-0.013125	0.00248528	-0.0496875	0.0202631			-0.00219891	-0.474485	0.0870146			0.244578	-0.0351321	0.00304295
0.010625	0.0103125	0.00246472	-0.05125	0.020022			-0.00219695	-0.469838	0.0859397			0.243906	-0.0359808	0.00279098
0.01625	0.0121875	0.00243691	-0.0515625	0.0197896			-0.00396734	-0.464235	0.0848291			0.243321	-0.0297138	0.00280537
0.0215625	0.0328125	0.00241945	-0.05125	0.0195653			-0.00393956	-0.457721	0.0837789			0.243536	-0.0289305	0.0028175
0.0165625	-0.008125	0.00240065	-0.0521875	0.0193388			-0.0029671	-0.450603	0.0827864			0.243414	-0.032782	0.00279655
-0.00375	-0.0071875	0.00241176	-0.05375	0.0191023			-0.00185819	-0.444397	0.0817172			0.240737	-0.0329126	0.00281009
0.0265625	0.0284375	0.00240555	-0.054375	0.0188916			-0.00203592	-0.441632	0.0806866			0.238794	-0.0328473	0.00281776
0.0209375	0.00625	0.0023938	-0.0553125	0.0186779			-0.00203061	-0.44047	0.0796915			0.23912	-0.03115	0.00268477
0.0396875	-0.0309375	0.00241656	-0.0571875	0.0184855			-0.00156977	-0.43772	0.078693			0.240818	-0.0302361	0.00253528
0.0096875	0.1225	0.00241217	-0.0571875	0.0182656			-0.00138938	-0.43247	0.077766			0.239162	-0.0255359	0.0024945
0.03125	-0.036875	0.00239783	-0.0571875	0.01807			-0.00166375	-0.428514	0.0768317			0.236316	-0.0280166	0.00247548
-0.00875	0.0146875	0.00237742	-0.0590625	0.0178542			-0.000282446	-0.425838	0.0758668			0.23698	-0.0322598	0.0025192
-0.01625	-0.0015625	0.00237788	-0.0615625	0.0176487			-0.000799125	-0.423926	0.0749151			0.234401	-0.0297138	0.00261295
0.0259375	0.0471875	0.00239428	-0.06125	0.0174554			-0.000551359	-0.421632	0.0740373			0.233571	-0.0255359	0.0026477
-0.000625	-0.0425	0.00239516	-0.0615625	0.0172392			-0.00028744	-0.416294	0.0731168			0.23456	-0.0240997	0.00264312
0.031875	0.00625	0.00236916	-0.0628125	0.0170569			-0.00127811	-0.4095	0.0721943			0.235314	-0.0268415	0.00271173
-0.0109375	0.0196875	0.00234504	-0.0621875	0.016856			-0.00146228	-0.401485	0.0712173			0.23709	-0.0267762	0.00277145
-0.004375	0.0078125	0.00232748	-0.0640625	0.016651			-0.00105006	-0.397514	0.0702789			0.241612	-0.0272332	0.00270594
0.0171875	0.026875	0.00229981	-0.0646875	0.0164613			-0.00040208	-0.394176	0.0693583			0.241578	-0.0287346	0.00257694
0.0053125	-0.05375	0.00229718	-0.0646875	0.0162621			-0.000105379	-0.388485	0.06849			0.240438	-0.0240345	0.00244202
-0.00125	0.0221875	0.00228021	-0.063125	0.0160614			0.000163782	-0.382176	0.0676529			0.24325	-0.0212927	0.00244259
-0.0171875	0.0171875	0.00225532	-0.06375	0.015879			-0.000492349	-0.375661	0.0668034			0.247497	-0.0259276	0.00239258
0.0340625	0.03	0.0022348	-0.0659375	0.0157158			0.000294151	-0.370705	0.0658882			0.250031	-0.0289305	0.00238858
0.013125	0.013125	0.00226361	-0.0659375	0.0155337			-0.000455946	-0.369514	0.0650724			0.250982	-0.0259276	0.00234391
-0.005	0.025	0.00225205	-0.0659375	0.0153458			-0.000157809	-0.369426	0.0642374			0.249742	-0.0240345	0.00239186
-0.00875	-0.0046875	0.00223907	-0.0675	0.0151639			-0.00169956	-0.366308	0.0634899			0.247684	-0.0220108	0.00239901
0.0125	-0.0003125	0.00223282	-0.066875	0.014988			-0.00114818	-0.362029	0.0627402			0.247308	-0.021358	0.00233398
-0.0025	0.033125	0.00221102	-0.066875	0.0148044			-0.00100151	-0.359161	0.0619499			0.244772	-0.0205093	0.00221946
0.0009375	0.0071875	0.00218418	-0.0678125	0.0146214			-0.000380298	-0.357543	0.061168			0.242857	-0.0239039	0.00213099
0.013125	0.0021875	0.00217705	-0.07	0.0144529			-0.000616409	-0.356146	0.0604421			0.243143	-0.0224677	0.00213257
0.028125	0.0234375	0.00216751	-0.0684375	0.0143015			-0.000654117	-0.353102	0.0597322			0.243045	-0.0161355	0.00212816
-0.0021875	-0.01125	0.00215621	-0.0684375	0.014126			-0.00145323	-0.348381	0.0590271			0.242502	-0.0156786	0.00201593
0.0171875	0.0015625	0.00215442	-0.0696875	0.0139677			-0.00170295	-0.341734	0.0583376			0.241948	-0.0194648	0.00190587
-0.004375	0.0165625	0.00213891	-0.0696875	0.0137986			-0.00251135	-0.33569	0.0575592			0.241128	-0.0201829	0.00185475
0.0090625	-0.01	0.00215578	-0.07	0.0136362			-0.00196758	-0.332867	0.0568679			0.237274	-0.0180287	0.00169483
-0.0078125	0.010625	0.002139	-0.069375	0.0134747			-0.00101038	-0.329014	0.0561714			0.235531	-0.0184856	0.00167304
0.021875	0.0171875	0.00214149	-0.0696875	0.0133291			-0.00103011	-0.323955	0.0554348			0.234961	-0.0169842	0.00160303
-0.013125	0.0028125	0.0021202	-0.0678125	0.0131767			-0.000978032	-0.317896	0.0548299			0.233958	-0.0150258	0.00147657
0.039375	0.0209375	0.00230324	-0.0675	0.0130524			-0.000865795	-0.313219	0.0540793			0.236708	-0.0168536	0.00148421
-0.005625	-0.0090625	0.00233713	-0.069375	0.0128959			-0.000938115	-0.310793	0.0534056			0.238371	-0.0214232	0.00149045
0.000625	0.0065625	0.00233216	-0.069375	0.0127363			-0.00129812	-0.31019	0.0528455			0.242132	-0.0175064	0.00144605
0.0140625	-0.0403125	0.00230818	-0.068125	0.0125921			-0.00172908	-0.309852	0.0521321			0.241559	-0.0126104	0.0013218
-0.0203125	-0.0090625	0.00230732	-0.0678125	0.012456			-0.00136126	-0.307058	0.0515135			0.239981	-0.0120229	0.00133888
-0.0296875	-0.000625	0.00230241	-0.06875	0.012331			-0.00169292	-0.303631	0.0508636			0.237737	-0.0132632	0.00131632
0.0096875	0.02125	0.00229287	-0.0684375	0.0121875			-0.00117009	-0.302469	0.050318			0.240259	-0.0131326	0.00124426
0.0234375	-0.0296875	0.0023147	-0.06875	0.0120595			-0.00121016	-0.302028	0.0497621			0.238944	-0.0144383	0.00116894
-0.0071875	0.0275	0.00229314	-0.07	0.0119169			-0.000791061	-0.301249	0.0492539			0.242038	-0.0126757	0.00103699
-0.0165625	0.0009375	0.0022784	-0.069375	0.0117855			-0.00016092	-0.298557	0.048742			0.243051	-0.00719214	0.000951797
0.00875	-0.0190625	0.00228104	-0.068125	0.0116478			-0.000632166	-0.292278	0.0482115			0.243197	-0.0069963	0.000941832
0.0240625	-0.015	0.00225364	-0.0678125	0.0115272			-0.0010814	-0.28744	0.047649			0.241825	-0.0117618	0.000850821
-0.0321875	0.0084375	0.00223377	-0.06875	0.0114162			-0.000931711	-0.283307	0.0470784			0.242855	-0.0132632	0.000858967
-0.00375	0.02875	0.00228102	-0.06875	0.0112781			-0.000375243	-0.281219	0.046565			0.242546	-0.00973808	0.000895539
0.025625	0.02625	0.00274112	-0.0675	0.0111636			-0.000313596	-0.278646	0.0460055			0.243993	-0.00784495	0.000790321
0.0015625	0.0034375	0.0029302	-0.06625	0.0110265			-0.000375841	-0.273337	0.0454627			0.245207	-0.00895471	0.000783659
-0.0025	0.0121875	0.00291911	-0.06625	0.010892			-0.000105633	-0.268175	0.0451242			0.24505	-0.00862831	0.00080794
-0.0053125	-0.0096875	0.00289816	-0.065625	0.0107621			8.65718e-05	-0.265351	0.0446108			0.243238	-0.00915055	0.000769421
-0.011875	0.0128125	0.00289185	-0.065625	0.0106402			-6.14522e-05	-0.264278	0.0441453			0.239683	-0.0119576	0.000698704
-0.0059375	-0.02	0.00289217	-0.06625	0.010514			1.93877e-05	-0.264616	0.0436475			0.237804	-0.00947695	0.00054977
0.0140625	-0.0215625	0.0028625	-0.065	0.0103975			0.000357797	-0.263675	0.0431307			0.240452	-0.00477677	0.000377272
0.000625	0.0084375	0.00284538	-0.06375	0.0102689			0.00116683	-0.261778	0.0426519			0.239807	-0.00503789	0.000386374
-0.0059375	-0.0109375	0.00283284	-0.0646875	0.0101473			0.00181112	-0.259381	0.0421554			0.241633	-0.00693102	0.000280219
0.008125	0.0015625	0.00280765	-0.0653125	0.0100294			0.00154933	-0.258851	0.0416673			0.239659	-0.00660462	0.00028897
0.0175	0.01	0.00278809	-0.0646875	0.00992228			0.000983729	-0.258822	0.0412007			0.238146	-0.00556014	0.000184545
0.0190625	-0.0003125	0.00278095	-0.06375	0.00981809			0.000446701	-0.258351	0.0407073			0.238511	-0.00458093	0.000197855
0.01625	-0.127813	0.00277672	-0.0640625	0.00971238			-0.000399946	-0.255028	0.0402387			0.239868	-0.00196972	0.000329515
-0.0115625	0.0834375	0.00276254	-0.0634375	0.00960329			-0.000234869	-0.250028	0.0397113			0.238691	-0.000859954	0.000406636
-0.0053125	-0.0428125	0.00274135	-0.0625	0.00948931			-0.000401985	-0.245189	0.0391844			0.240207	-0.00562542	0.000382178
0.00125	0.02125	0.00274823	-0.063125	0.00937268			-0.000440048	-0.242631	0.0387807			0.237765	-0.00888943	0.00043375
0.033125	0.0034375	0.00273815	-0.0628125	0.00928938			-0.000317566	-0.240895	0.0383002			0.235791	-0.00360173	0.000432295
0.005	-0.018125	0.00271008	-0.061875	0.00917898			-0.000463649	-0.237704	0.0378441			0.236007	-0.000141873	0.000575306
-0.02	0.003125	0.00270641	-0.060625	0.00908496			-0.000781068	-0.23363	0.0374471			0.23553	-0.00366701	0.000559645
-0.013125	0	0.00268436	-0.060625	0.00898523			-0.000223397	-0.229219	0.0369882			0.235951	-0.00523373	0.00043085
0.0128125	-0.0009375	0.00266289	-0.0603125	0.00888642			-0.00122871	-0.226719	0.0365583			0.236152	-0.00627822	0.000424765
-0.006875	-0.008125	0.00264918	-0.059375	0.00878291			-0.000917128	-0.22766	0.0361148			0.236261	-0.00653934	0.000393598
-0.02125	0.068125	0.00264502	-0.059375	0.00869506			-0.00143285	-0.228454	0.0358294			0.233212	-0.00693102	0.000482112
0.020625	-0.254687	0.00264873	-0.0590625	0.00860767			-0.00152583	-0.227322	0.0354704			0.230741	-0.00196972	0.000414964
0.0203125	0.091875	0.00263645	-0.058125	0.00852106			-0.00164459	-0.225086	0.035017			0.227959	-0.00131691	0.000464831
-0.010625	0.0025	0.0026312	-0.058125	0.00842583			-0.00189963	-0.224395	0.0345919			0.227712	-0.00477677	0.00043576
0.0240625	0.0009375	0.00262226	-0.05875	0.00834523			-0.00179749	-0.224792	0.034182			0.228264	-0.00582126	0.000289056
0.0025	-0.0715625	0.00260219	-0.05875	0.00824406			-0.0012826	-0.223792	0.0337732			0.228711	-0.0030142	0.000190594
-0.0040625	0.0296875	0.00260205	-0.0571875	0.00814571			-0.00102806	-0.224542	0.033366			0.228373	0.00044565	0.000344906
0.001875	0.003125	0.00262598	-0.0575	0.0080464			-0.000621998	-0.220836	0.0329284			0.229361	-0.00157804	0.000287242
0.0228125	0.0178125	0.00260523	-0.056875	0.00796926			-0.000807396	-0.214351	0.0324991			0.227966	-0.00229612	0.00037189
0.01625	0.058125	0.00258881	-0.0565625	0.00788651			-0.000839653	-0.21091	0.0322006			0.229095	-0.00353645	0.000351495
0.003125	-0.005625	0.0025904	-0.055625	0.00779167			-0.000637557	-0.210174	0.0318753			0.228216	-0.00712686	0.000342763
0.0028125	0.00625	0.00256635	-0.0559375	0.00769769			-0.000891255	-0.208057	0.0314437			0.228233	-0.00582126	0.0003108
-0.0003125	-0.015	0.0025529	-0.05375	0.00760238			-0.000211388	-0.203983	0.0310852			0.22801	-0.000990515	0.000166167
0.0059375	0.01375	0.002539	-0.0525	0.00751388			-0.00064045	-0.199601	0.0306775			0.225033	-0.00262252	0.000140806
0.030625	-0.0078125	0.00251559	-0.0528125	0.00745117			-0.000346943	-0.196071	0.0303323			0.225208	-0.00673518	0.000194338
0.053125	0.005625	0.00250747	-0.0528125	0.00741174			-6.40101e-05	-0.195365	0.0300279			0.226973	-0.00725742	8.14929e-05
-0.019375	0.00375	0.00251038	-0.051875	0.00733904			-0.000384086	-0.197307	0.0296087			0.228143	-0.00549485	9.53058e-05
-0.010625	-0.006875	0.00248076	-0.051875	0.0072585			-0.000686335	-0.197616	0.0292745			0.228994	-0.00438509	-1.76064e-05
-0.026875	-0.0075	0.00245557	-0.051875	0.00719521			-0.00130959	-0.195307	0.0289892			0.226995	-0.00275308	-7.30999e-05
0.00625	0.0184375	0.00245194	-0.0503125	0.00711208			-0.00172963	-0.193233	0.0286487			0.223973	-0.0013822	-0.000138279
0.0084375	-0.005	0.00242429	-0.0503125	0.00703217			-0.00226527	-0.193115	0.0283413			0.223649	-0.00764911	-0.000204461
0.04375	0.01625	0.00241293	-0.0509375	0.00698856			-0.00200698	-0.19413	0.0279982			0.223015	-0.00751855	-7.16942e-05
-0.0015625	0	0.0023967	-0.050625	0.00690331			-0.00141715	-0.193968	0.0276757			0.222526	-0.00255724	-7.95765e-05
-0.0290625	-0.01	0.00237349	-0.0490625	0.00684662			-0.000943923	-0.192704	0.0273463			0.223187	0.00109845	-1.76025e-05
0.00625	-0.004375	0.00236432	-0.0496875	0.00676782			-0.000488113	-0.187733	0.0270434			0.223672	-0.00386285	-0.000142078
-0.02125	-0.0065625	0.00234651	-0.049375	0.006705			-0.000201891	-0.18238	0.0266473			0.223441	-0.00438509	-0.000133008
-0.0059375	0.0190625	0.0023308	-0.0484375	0.00662764			5.36685e-06	-0.180292	0.0263265			0.221518	-0.00321005	-0.000103824
0.011875	-0.0146875	0.00230497	-0.0478125	0.00655719			3.02605e-06	-0.17863	0.026			0.223712	-0.00588654	-0.000147095
-0.0065625	0.0075	0.00227978	-0.0475	0.0064823			9.15321e-05	-0.175851	0.0256465			0.224396	-0.0056907	-0.000172454
0.02375	0	0.00226302	-0.0459375	0.00642552			-1.34589e-05	-0.171954	0.0254123			0.222314	-0.00275308	-0.000247808
-0.0075	0.020625	0.00227678	-0.0440625	0.0063532			-0.000271055	-0.168409	0.0250918			0.220672	-0.00229612	-0.000248317
-0.01125	0.0003125	0.00227538	-0.045	0.00628553			-0.000493132	-0.165777	0.0248			0.218162	-0.00823663	-0.000265417
0.024375	0.01125	0.00225117	-0.045625	0.00623183			-0.000874828	-0.164762	0.0244896			0.217712	-0.00915055	-0.000259483
0.0234375	0.018125	0.00223977	-0.04375	0.00617785			-0.00116406	-0.166453	0.0241764			0.219028	-0.00425453	-0.000328569
-0.024375	0.02	0.00221476	-0.04375	0.00612548			-0.0014543	-0.166851	0.0239442			0.221242	-0.00262252	-0.000518942
-0.00125	0.02	0.00222881	-0.0434375	0.00605064			-0.00190333	-0.164836	0.023658			0.222063	-0.00347117	-0.000443211
-0.0296875	-0.005625	0.00227456	-0.0425	0.00600517			-0.00181962	-0.163292	0.0233281			0.222299	-0.00177388	-0.000441293
0.0109375	0.0253125	0.00224631	-0.0421875	0.00594151			-0.002034	-0.162865	0.023015			0.222396	-0.00392813	-0.000576843
0.0025	0.0090625	0.00223872	-0.0434375	0.0058702			-0.00205872	-0.163336	0.0227501			0.220602	-0.00595182	-0.000657288
0.03375	0.016875	0.00224247	-0.0421875	0.00583103			-0.00136897	-0.164336	0.0224956			0.218903	-0.00275308	-0.000522266
0	-0.0134375	0.00222274	-0.0409375	0.0057586			-0.000760893	-0.162056	0.0221775			0.220893	0.00246934	-0.000343279
-0.01125	-0.0046875	0.00220106	-0.0403125	0.00569831			-0.00102921	-0.156498	0.021938			0.223986	-0.00255724	-0.000492237
-0.018125	0.0234375	0.00218622	-0.0403125	0.00564565			0.000248781	-0.152115	0.0216511			0.224537	-0.00614766	-0.000580216
-0.015625	0.00125	0.00216	-0.0396875	0.00559114			0.000695928	-0.150086	0.0214368			0.226854	-0.00334061	-0.000474419
-0.016875	-0.000625	0.00214911	-0.0396875	0.00553857			0.00039027	-0.149395	0.0211456			0.229425	-0.00177388	-0.000495452
0.005625	-0.023125	0.00215241	-0.039375	0.00547539			0.00088491	-0.146512	0.0208331			0.231644	-0.00321004	-0.000442056
-0.0115625	-0.0215625	0.00214661	-0.0375	0.00541894			0.00140804	-0.142409	0.0205877			0.232755	-0.0030142	-0.000396066
0.010625	0.003125	0.00218776	-0.03625	0.00536225			0.0015699	-0.138939	0.020258			0.231472	-0.000794673	-0.000439337
0.043125	-0.01	0.00216777	-0.036875	0.00533876			0.000867059	-0.136909	0.0200517			0.232397	-0.00542958	-0.00051734
0.0109375	-0.0203125	0.00216834	-0.0371875	0.00528338			0.000978691	-0.13735	0.0197941			0.229578	-0.00706158	-0.000387429
0.005625	-0.005625	0.00216172	-0.0359375	0.00522337			0.00124977	-0.139512	0.0195959			0.22572	-0.000272431	-0.000467633
-0.0046875	0.001875	0.00231955	-0.035	0.00516317			0.00174605	-0.139071	0.0193166			0.223704	-0.000207152	-0.000495494
0.054375	-0.0021875	0.00232199	-0.034375	0.00515341			0.00219845	-0.137189	0.0190704			0.224009	-0.00118636	-0.000377005
-0.0290625	0.019375	0.00230189	-0.035	0.00511846			0.00223121	-0.136247	0.0187434			0.224638	-0.00151276	-0.000288514
0.009375	0.03	0.00227767	-0.035	0.00506425			0.00225817	-0.136924	0.0184914			0.225522	-0.000337712	-0.000166373
-0.0165625	0.0234375	0.00226813	-0.035625	0.0050179			0.00190079	-0.137777	0.0182273			0.224148	-0.00118635	-0.000204199
0.0015625	0.013125	0.00224183	-0.0346875	0.00495713			0.00146473	-0.138262	0.0180128			0.224279	-7.65916e-05	-0.000358255
-0.01125	-0.00125	0.00223461	-0.0334375	0.0049068			0.0016128	-0.13485	0.0177617			0.223709	0.00514583	-0.000485501
0.0240625	-0.015	0.00222935	-0.0321875	0.00486991			0.00102178	-0.129983	0.0174867			0.222641	0.00201238	-0.000432228
-0.006875	0.0225	0.00222572	-0.0328125	0.00481629			0.00122923	-0.126115	0.017251			0.221053	-0.00353645	-0.000624425
0.009375	0.0159375	0.00223182	-0.033125	0.00476584			0.000977736	-0.125203	0.017093			0.219272	-0.00223084	-0.000680421
0.0021875	-0.0246875	0.00223159	-0.031875	0.00470882			0.000628557	-0.1241	0.0169393			0.219823	0.00299158	-0.000751021
-0.0184375	0.0196875	0.00222887	-0.03125	0.00466877			0.000957096	-0.121188	0.0167913			0.220658	0.00168598	-0.000850827
0.006875	-0.0040625	0.00221118	-0.0296875	0.00461765			0.000598937	-0.117409	0.016621			0.220744	0.000184531	-0.000844104
0.0040625	0.0125	0.00234309	-0.0296875	0.00456435			0.000459171	-0.113835	0.0164012			0.220051	0.00168598	-0.000693277
0.0071875	-0.010625	0.00233992	-0.029375	0.00451483			-0.000236028	-0.113571	0.0161202			0.221603	-0.00131692	-0.000792502
0.0071875	0.0209375	0.00234179	-0.0296875	0.00446594			-0.000949524	-0.115365	0.0159528			0.222679	-0.00196972	-0.000930433
0.0075	-0.10625	0.00231833	-0.02875	0.00441796			-0.000538282	-0.116527	0.0157269			0.222713	0.00449303	-0.000997927
-0.015	0.06375	0.00230078	-0.028125	0.00437808			-0.000876323	-0.11585	0.0155983			0.222692	0.00775705	-0.00104332
0.0140625	0.0121875	0.0022997	-0.0271875	0.00433776			-0.00122171	-0.114291	0.0154206			0.22302	0.00377495	-0.00113664
0.0040625	0.0128125	0.00227644	-0.0275	0.00428794			-0.00142659	-0.114174	0.0152784			0.224665	0.000315091	-0.00105609
0.0309375	-0.04375	0.00230442	-0.0284375	0.00426561			-0.000820106	-0.115762	0.0151544			0.225129	0.00364439	-0.00111139
-0.00125	0.0065625	0.00234266	-0.0278125	0.00421387			-0.00142631	-0.11638	0.0149873			0.22492	0.00527639	-0.00121294
0.0096875	0.0515625	0.00235263	-0.026875	0.00417121			-0.00232587	-0.115762	0.0148254			0.223126	0.00377495	-0.00121443
0.01125	-0.0871875	0.00237465	-0.0265625	0.00413065			-0.00213918	-0.112174	0.0146196			0.220637	0.00906265	-0.00124883
0.0084375	0.034375	0.00235047	-0.0253125	0.00408777			-0.00159388	-0.107821	0.014466			0.218691	0.0069084	-0.00125195
-0.0084375	-0.0365625	0.00234033	-0.025	0.00404543			-0.00176741	-0.106365	0.0142775			0.219031	0.00188182	-0.00111861
-0.0146875	0.044375	0.00232813	-0.0259375	0.00400986			-0.00246112	-0.105674	0.014098			0.219072	0.00325271	-0.00126209
-0.008125	0.0134375	0.00233296	-0.0234375	0.00396818			-0.00215731	-0.103306	0.0139366			0.217071	0.00769177	-0.00125778
0.0115625	0.01875	0.00231273	-0.0221875	0.00393045			-0.00296084	-0.100615	0.013796			0.21396	0.00899737	-0.00132561
-0.01375	0.0265625	0.00230463	-0.02125	0.00389537			-0.00323569	-0.0972764	0.0136034			0.21346	0.00403607	-0.00141284
0.0121875	0	0.00229694	-0.021875	0.00385917			-0.00373339	-0.0957176	0.0133802			0.214445	0.00436247	-0.00155992
0.01	-0.000625	0.00226965	-0.0215625	0.00382123			-0.00467664	-0.0957323	0.0133247			0.216402	0.00449303	-0.00145855
0.0375	-0.0240625	0.00229115	-0.020625	0.00381126			-0.00462389	-0.0977176	0.0131784			0.21867	0.00547223	-0.00144531
0.0140625	0.0121875	0.00229925	-0.02125	0.00377798			-0.00459951	-0.0993206	0.0130614			0.218651	0.00893209	-0.0014242
-0.043125	-0.0096875	0.00227069	-0.01875	0.00377418			-0.00478628	-0.0980853	0.0128468			0.222049	0.0112822	-0.00146196
0.015625	-0.024375	0.0022606	-0.0190625	0.00374292			-0.00463521	-0.0980706	0.0127439			0.220113	0.00906265	-0.00149563
0.0078125	-0.0128125	0.00224127	-0.0196875	0.00370423			-0.00420511	-0.0984823	0.0125911			0.219342	0.00651672	-0.00143733
0.013125	0.0153125	0.00222249	-0.02	0.00367134			-0.00366339	-0.0999529	0.0124497			0.221747	0.00932377	-0.001331
0.019375	-0.0165625	0.0022127	-0.01875	0.00364511			-0.00390874	-0.101629	0.0123918			0.223463	0.0127183	-0.00141789
-0.148125	0.0028125	0.00219552	-0.018125	0.00374796			-0.00358802	-0.100512	0.0123576			0.223641	0.0126531	-0.00148348
0.021875	0.0328125	0.00219356	-0.0175	0.00372328			-0.00306858	-0.0970559	0.0122383			0.223106	0.0111516	-0.0016302
-0.02125	0.0078125	0.00217725	-0.0171875	0.00369827			-0.00305351	-0.0925117	0.0121059			0.223773	0.0118697	-0.00170482
-0.0165625	0.0425	0.00215489	-0.01625	0.0036689			-0.00340109	-0.0924088	0.0119886			0.222762	0.00925849	-0.00161799
0.0240625	0.0034375	0.00213312	-0.0175	0.00364738			-0.00379361	-0.0916146	0.01187			0.223861	0.00951961	-0.00160796
0.03	0.068125	0.00213913	-0.0146875	0.00363207			-0.00417587	-0.0897029	0.0117769			0.2218	0.0142851	-0.00155319
0.01375	-0.301875	0.00213099	-0.0134375	0.00360071			-0.00440254	-0.0874087	0.011656			0.221206	0.015656	-0.0015782
0.005625	0.196562	0.00210827	-0.0125	0.0035616			-0.00483495	-0.0847911	0.0115908			0.220735	0.0108252	-0.00160627
0.019375	-0.0296875	0.00209771	-0.0140625	0.00353673			-0.00465249	-0.083791	0.0114639			0.219232	0.00906265	-0.00151418
0.01125	-0.0571875	0.00208415	-0.013125	0.00350405			-0.00484938	-0.0844822	0.0113116			0.217198	0.0112822	-0.00158557
0.0125	0.0103125	0.0020642	-0.0115625	0.00347302			-0.00529932	-0.0874528	0.011227			0.215831	0.013567	-0.00175618
0.0084375	0.0021875	0.00206012	-0.0128125	0.00343832			-0.00469553	-0.0880411	0.0110847			0.216305	0.0140892	-0.00178386
0.020625	-0.0090625	0.00205952	-0.0115625	0.00341623			-0.00379063	-0.0871734	0.0109899			0.218055	0.0157865	-0.00185475
0.021875	0.0084375	0.00204738	-0.0109375	0.00339567			-0.00342413	-0.0880558	0.0108391			0.219779	0.0163088	-0.00181922
-0.006875	-0.0140625	0.0020457	-0.011875	0.00336036			-0.00330691	-0.0900264	0.0106832			0.219405	0.010303	-0.00179917
-0.035625	0.0275	0.00202528	-0.0121875	0.00335424			-0.00373523	-0.0907764	0.0105864			0.219698	0.0153948	-0.00177393
-0.004375	0.0015625	0.00202169	-0.01	0.00331695			-0.00399431	-0.0911146	0.0104515			0.219417	0.0191158	-0.00174251
-0.0165625	0.00625	0.00200439	-0.01	0.00329231			-0.00361527	-0.0889529	0.0103606			0.219957	0.0185283	-0.0016827
0.000625	0.0090625	0.00198042	-0.01	0.00325204			-0.00252756	-0.0862028	0.0102443			0.221729	0.0145462	-0.00155802
0.0203125	0.01125	0.00196582	-0.0096875	0.00323195			-0.00210826	-0.0829675	0.0102221			0.222772	0.0136323	-0.00159775
0.0146875	-0.01125	0.00194922	-0.01	0.00320649			-0.00168955	-0.0840705	0.010079			0.22384	0.0148073	-0.00155893
-0.000625	0.01375	0.00192625	-0.00875	0.00316729			-0.00215183	-0.0830999	0.0100054			0.225407	0.0140892	-0.0014293
-0.0090625	-0.014375	0.0019217	-0.0075	0.003137			-0.00262374	-0.0801734	0.00997689			0.226302	0.0153296	-0.00145767
0.008125	0.018125	0.00191658	-0.0065625	0.00310616			-0.0022625	-0.0779528	0.00986744			0.225864	0.0175491	-0.00155362
0.019375	-0.0115625	0.00189808	-0.00625	0.00308695			-0.00157561	-0.0760704	0.00970292			0.225056	0.0132406	-0.00150731
0.0153125	0.0171875	0.00193763	-0.006875	0.00306392			-0.00202005	-0.0754674	0.0096255			0.223284	0.00814873	-0.00146053
0.0134375	-0.015	0.00196043	-0.006875	0.00303929			-0.00225349	-0.0783645	0.00951539			0.223628	0.0128489	-0.00159379
0.0046875	0.019375	0.00194202	-0.005625	0.00300622			-0.0024217	-0.0803057	0.00939712			0.223954	0.0155907	-0.00160404
-0.0084375	0.0134375	0.00192602	-0.005625	0.00297732			-0.00135265	-0.0803204	0.00933285			0.223887	0.0151337	-0.00164786
0.0428125	-0.005	0.00194522	-0.0046875	0.00298315			-0.00136121	-0.0794822	0.00927259			0.224292	0.014742	-0.00165536
-0.014375	0.0090625	0.00192887	-0.0046875	0.00296046			-0.00173443	-0.0805704	0.00912042			0.221764	0.0138281	-0.00162878
0.0675	-0.025625	0.00193178	-0.0053125	0.00299119			-0.00105102	-0.0824087	0.0090063			0.220365	0.0120655	-0.00165752
0.02125	0.0109375	0.00193497	-0.00625	0.00297528			-0.000582332	-0.0839381	0.00890581			0.217841	0.0131753	-0.00163352
-0.008125	-0.010625	0.0019175	-0.005	0.00294645			-0.00103141	-0.0834528	0.00882427			0.22389	0.017288	-0.00165312
0.0121875	-0.0084375	0.00189524	-0.0040625	0.00292203			-0.000492179	-0.0804087	0.00880988			0.225733	0.0171574	-0.00168363
0.005625	0.0078125	0.00191107	-0.0040625	0.00289136			-0.000240532	-0.0772616	0.00874577			0.228793	0.0125225	-0.0017205
-0.0121875	0.0215625	0.00189171	-0.0046875	0.00286763			0.000270412	-0.0757616	0.00863905			0.232324	0.0108905	-0.00166226
0.0053125	0.024375	0.00189196	-0.0034375	0.00283732			0.00082811	-0.0759233	0.008569			0.234121	0.0127183	-0.00167761
0.0546875	0	0.00188033	-0.0034375	0.00285676			0.000438465	-0.0745116	0.00851356			0.234119	0.0125225	-0.00177291
0.0175	-0.0096875	0.00188541	-0.0028125	0.00283877			0.000115993	-0.0718792	0.00840114			0.232907	0.0121961	-0.00178689
0.0403125	0.0165625	0.00188105	-0.0015625	0.00284382			0.00111965	-0.0687615	0.00828532			0.231007	0.0132406	-0.00180018
0.005625	0.0003125	0.00186269	-0.00125	0.00281412			0.00184072	-0.0674233	0.00815225			0.230726	0.0110211	-0.00178218
0.004375	0.01625	0.00185455	-0.001875	0.00278354			0.00140233	-0.0687174	0.00806354			0.22834	0.00782233	-0.00176778
-0.025	0.005	0.00183651	-0.0021875	0.00277396			0.000462231	-0.0709233	0.00798755			0.224406	0.00827929	-0.00175407
0.02625	-0.0034375	0.00187057	-0.0003125	0.00276575			-0.000254552	-0.072188	0.00790948			0.226492	0.0143504	-0.00174339
-0.0053125	0.0196875	0.00188515	0	0.00273671			0.000217316	-0.0712909	0.0078409			0.226578	0.0148073	-0.00168046
-0.02875	0.0040625	0.00187642	-0.00125	0.00273146			-0.000184747	-0.0703498	0.00771802			0.229094	0.00997658	-0.00177365
0.0040625	0.005625	0.00187811	-0.0009375	0.00270159			0.000355516	-0.0722027	0.00768629			0.227935	0.0106294	-0.00174146
0.001875	0.0425	0.00187259	-0.0009375	0.00266991			0.000276491	-0.0744527	0.007563			0.226312	0.0120003	-0.0017024
-0.0353125	0.014375	0.00186964	-0.00125	0.00267206			0.000385455	-0.0753351	0.00749703			0.224832	0.0115433	-0.0017183
0.05125	-0.0134375	0.00185079	-0.0009375	0.00269011			0.000786265	-0.0728204	0.00741593			0.224733	0.0136323	-0.00165127
-0.0190625	-0.00875	0.00185686	-0.000625	0.00267576			0.00141067	-0.0694674	0.00733017			0.22675	0.0162435	-0.00155499
0.0021875	-0.000625	0.00184755	0	0.00264471			0.00204808	-0.0660997	0.00724986			0.224817	0.0106947	-0.00150606
0.0203125	0.0296875	0.00183241	-0.0003125	0.00263217			0.00213427	-0.0654527	0.0072736			0.222478	0.00730008	-0.00141159
0.0134375	-0.004375	0.00182215	0	0.00261291			0.001516	-0.0650556	0.00714632			0.220454	0.0110211	-0.00138597
0.011875	0.0453125	0.00184639	0.001875	0.00259232			0.0024407	-0.0629379	0.0071044			0.221971	0.0148726	-0.00131243
-0.0184375	0.0178125	0.00221189	0.001875	0.00257856			0.00210875	-0.0600556	0.00698769			0.221286	0.0109558	-0.00125485
0.01625	0.068125	0.00232191	0.001875	0.00256278			0.00208721	-0.0575408	0.00695352			0.22048	0.0101724	-0.00111733
0.015	0.0115625	0.00233463	0.0025	0.00254594			0.00102625	-0.0564232	0.00684033			0.22035	0.00925849	-0.00118251
0.009375	0.0134375	0.00235844	0.001875	0.00252369			0.000691861	-0.0585408	0.0066967			0.221588	0.00782233	-0.00108531
0.01125	-0.09	0.00234446	0.00125	0.00250359			0.000560946	-0.0603791	0.0065791			0.2199	0.00834457	-0.000943673
-0.005625	0.0503125	0.0023169	0.0025	0.00247812			0.0004609	-0.0604967	0.00641464			0.226183	0.0138281	-0.00103279
-0.0003125	-0.0628125	0.00230655	0.003125	0.00244765			0.000971593	-0.0597761	0.00628068			0.226036	0.013567	-0.00101084
0.0046875	0.06625	0.00232134	0.0025	0.00242193			0.00144209	-0.0592173	0.0062574			0.225315	0.0099113	-0.000999533
0.0259375	-0.010625	0.00230188	0.0015625	0.00241778			0.000863193	-0.0614085	0.00619398			0.226758	0.00912793	-0.000858445
0.0346875	0.0284375	0.00227672	0.001875	0.00242243			6.37028e-05	-0.0620262	0.00614174			0.228005	0.0124572	-0.00100022
0.0596875	-0.014375	0.00224875	0.0025	0.00245203			0.000285358	-0.0627173	0.00607345			0.226907	0.0128489	-0.00103833
-0.0309375	0.02625	0.002228	0.0015625	0.00245251			0.00129075	-0.0609379	0.00598801			0.228241	0.0130448	-0.00093358
-0.0665625	-0.0596875	0.0022097	0.0025	0.0024886			0.00126938	-0.0563055	0.00582155			0.229501	0.0142851	-0.000961098
0.0040625	0.009375	0.00220506	0.0028125	0.00246175			0.00105818	-0.0543643	0.005715			0.22918	0.0106294	-0.00107204
-0.014375	0.005625	0.00222611	0.003125	0.00244555			0.00124054	-0.053982	0.0055375			0.227449	0.00710424	-0.00103586
0.0015625	0.0025	0.00221158	0.0025	0.00241673			0.00115283	-0.0531584	0.00549547			0.227724	0.00978074	-0.00113186
0.0215625	0.0134375	0.00218848	0.0040625	0.00240827			0.000821486	-0.0508055	0.00542328			0.228218	0.016374	-0.000955679
0.0040625	0.0140625	0.00219036	0.0053125	0.00238242			0.000609696	-0.0477908	0.00540896			0.230793	0.0123919	-0.00086
0.031875	-0.0240625	0.00216503	0.004375	0.0023847			7.50083e-05	-0.0449966	0.00533014			0.230689	0.00880153	-0.000977124
-0.0109375	0.0125	0.00214157	0.004375	0.00236601			1.77739e-06	-0.0453348	0.0052201			0.233472	0.00821401	-0.00100177
0.0178125	0.00375	0.00213372	0.004375	0.00235443			0.000317317	-0.0485408	0.0051455			0.236601	0.00971546	-0.00108342
0.008125	0.0125	0.00210784	0.0046875	0.00233331			0.000730521	-0.0498055	0.00504395			0.234894	0.0100419	-0.00107458
0.0003125	0.015625	0.00208509	0.00375	0.00230464			0.000227423	-0.0493202	0.00498176			0.237946	0.0136323	-0.00105834
-0.0071875	0.0015625	0.00206294	0.0053125	0.0022832			-0.000270198	-0.0485849	0.00488003			0.239618	0.0150032	-0.00100521
-0.0075	0.00875	0.00207481	0.0046875	0.00226234			-0.000182147	-0.0498643	0.00481292			0.239073	0.00951962	-0.00106685
0.0409375	0.005625	0.00205435	0.003125	0.00227517			-0.000292203	-0.0513643	0.00480758			0.240379	0.00965017	-0.00120526
-0.00875	0.00375	0.00204446	0.0034375	0.00225566			-0.00125646	-0.0525702	0.00475613			0.243073	0.0142851	-0.00107951
0.01125	0.01	0.0020325	0.0046875	0.00223889			-0.000983772	-0.052879	0.00469365			0.247219	0.015199	-0.000965177
-0.005	0.011875	0.0020285	0.004375	0.00221608			-0.00124471	-0.049629	0.00460228			0.246053	0.0131753	-0.00093525
-0.015	0.0140625	0.00202799	0.004375	0.00220355			-0.000729755	-0.0451731	0.00452051			0.246159	0.0123919	-0.000962488
-0.034375	-0.0140625	0.00201686	0.0040625	0.00221055			-0.000997698	-0.0439084	0.00449403			0.246113	0.01311	-0.00100287
0.010625	0.0025	0.00203587	0.0040625	0.00219371			-0.00135004	-0.0439525	0.0044316			0.24698	0.00997658	-0.000865894
0.0025	-0.013125	0.00203839	0.004375	0.00216896			-0.00160489	-0.0421584	0.00435756			0.246339	0.0110863	-0.000774182
-0.0171875	-0.0065625	0.00202963	0.0053125	0.00215921			-0.00165186	-0.0393642	0.00436675			0.245051	0.0153296	-0.000933346
-0.0171875	0.0075	0.00201348	0.0071875	0.00214957			-0.00184909	-0.0378201	0.00435387			0.247841	0.0151337	-0.000951013
-0.0015625	0.0115625	0.00199972	0.00625	0.00212443			-0.0021393	-0.0360995	0.00430106			0.24897	0.00938905	-0.0010154
-0.02125	0.000625	0.00198957	0.005625	0.00211929			-0.00204496	-0.036276	0.00428093			0.249965	0.0106947	-0.000976808
0.0015625	-0.0028125	0.00197048	0.005625	0.00209453			-0.00166475	-0.0395995	0.00426683			0.250186	0.0136323	-0.000947775
-0.025625	-0.029375	0.00195944	0.00625	0.00209414			-0.00111302	-0.0407466	0.0042702			0.248314	0.0141545	-0.000962928
0.0215625	-0.0396875	0.00198853	0.0065625	0.00208968			-0.00093601	-0.0401583	0.00416679			0.248275	0.0157212	-0.000927842
0.0159375	0.0253125	0.00210727	0.00625	0.00207966			-0.00126373	-0.0396289	0.00407647			0.25153	0.0152643	-0.000856108
0.05125	-0.013125	0.00218203	0.0065625	0.00210508			-0.00167279	-0.0411142	0.00402343			0.256648	0.0144809	-0.00093049
0.0215625	-0.033125	0.00217586	0.0053125	0.00210049			-0.00212449	-0.0432319	0.00399285			0.256048	0.0118044	-0.0008289
-0.013125	-0.028125	0.00220321	0.005	0.00208752			-0.00188411	-0.0445113	0.00393974			0.25689	0.0171574	-0.000900767
0.0240625	-0.005	0.00219178	0.006875	0.00208565			-0.0013666	-0.0434378	0.00387835			0.25651	0.022641	-0.000908725
-0.0040625	0.02375	0.00218392	0.006875	0.00206381			-0.00242699	-0.0395113	0.00381042			0.254911	0.0172227	-0.000892206
-0.0209375	-0.0034375	0.00217586	0.0065625	0.00205911			-0.00194921	-0.0356142	0.00375693			0.253513	0.0144809	-0.000944876
0.02875	0.025	0.00216289	0.0065625	0.00206228			-0.00245519	-0.0352318	0.00364372			0.252299	0.0174185	-0.00119424
0.003125	0.01	0.00214009	0.0075	0.00203979			-0.00275941	-0.0358642	0.00357579			0.250763	0.0176797	-0.00110649
-0.035	-0.0034375	0.00211506	0.006875	0.00204945			-0.00237418	-0.0341289	0.00353832			0.252214	0.0185283	-0.000984042
0.028125	0.0178125	0.00213067	0.009375	0.00205212			-0.00245007	-0.0317612	0.00349039			0.251375	0.0193117	-0.00102338
0.0203125	-0.0040625	0.00214326	0.01	0.00204694			-0.00185243	-0.0291582	0.00354955			0.2512	0.020095	-0.00105212
0.001875	0.009375	0.00212726	0.0090625	0.00202338			-0.00197405	-0.02957	0.00351334			0.251436	0.0146768	-0.000859807
0.0396875	0.0478125	0.00214271	0.008125	0.00203794			-0.00204415	-0.0310847	0.00345445			0.252066	0.0136976	-0.000882536
-0.0284375	0.005	0.00212234	0.00875	0.00204106			-0.00194638	-0.0343053	0.00346218			0.254656	0.020095	-0.000796065
-0.0009375	-0.013125	0.00211098	0.009375	0.00201664			-0.00221075	-0.0342906	0.00345335			0.25651	0.0217923	-0.000775759
0.0075	-0.01	0.00209944	0.01	0.00199909			-0.00242181	-0.0340259	0.00347021			0.256656	0.0219882	-0.000776711
-0.0028125	0.0053125	0.00208305	0.009375	0.00197707			-0.00252483	-0.0355554	0.00347769			0.256115	0.0202909	-0.00065447
0.01875	-0.0075	0.00206561	0.00875	0.00197126			-0.00261347	-0.0372907	0.00347345			0.254596	0.0210089	-0.000509629
0.0159375	0.005	0.00204183	0.00875	0.00196271			-0.00269409	-0.0398054	0.00354989			0.252918	0.0201603	-0.000364512
0.00375	0.01	0.00201928	0.01	0.00194208			-0.00350866	-0.040526	0.0034566			0.253864	0.0219882	-0.000475084
0.040625	-0.0153125	0.00200982	0.0103125	0.00195858			-0.0036074	-0.0383348	0.00343253			0.254542	0.02708	-0.000602694
0.0265625	0.0228125	0.00201829	0.010625	0.00196081			-0.00386114	-0.0348201	0.00333649			0.255636	0.0245341	-0.000760616
0.006875	0.0059375	0.00199666	0.0109375	0.00194333			-0.00383637	-0.0323642	0.0034376			0.257713	0.0189853	-0.000590339
0.008125	-0.001875	0.00199029	0.009375	0.00192731			-0.00466983	-0.032423	0.00345752			0.255067	0.0208784	-0.000606561
-0.008125	0.02625	0.00198494	0.010625	0.0019115			-0.00444556	-0.0327465	0.00348987			0.257603	0.0232285	-0.000658888
-0.029375	0.0109375	0.00197185	0.0125	0.00191713			-0.0041879	-0.0312318	0.00352883			0.261135	0.0244688	-0.000561191
-0.025625	0.0109375	0.00199485	0.0128125	0.00191894			-0.00381107	-0.02832	0.00354026			0.261491	0.0219882	-0.000501792
-0.0246875	0.0125	0.00200195	0.01375	0.00191979			-0.00242464	-0.0262906	0.00352081			0.261159	0.0219882	-0.00047399
0.00375	0.0690625	0.00205927	0.0134375	0.00189969			-0.00279543	-0.0279377	0.00355039			0.260831	0.0192464	-0.000405041
0.0278125	0.111875	0.00208618	0.0125	0.0019039			-0.0022489	-0.0306436	0.00352212			0.259444	0.0198339	-0.000415267
-0.020625	-0.0103125	0.00207808	0.0125	0.00190088			-0.00235252	-0.0331583	0.00354952			0.256244	0.0240771	-0.000387243
0.0225	0.03625	0.00207696	0.0140625	0.00189976			-0.00228093	-0.0325847	0.00348982			0.253822	0.0282551	-0.000379278
0.0025	0.005625	0.00207459	0.01375	0.00187867			-0.00197244	-0.0330848	0.00347451			0.253777	0.0253174	-0.000309689
0.0003125	0.0375	0.00207195	0.0128125	0.00185564			-0.00177602	-0.0343495	0.00333029			0.253045	0.0212048	-0.000343402
-0.01125	0.0234375	0.00208433	0.0128125	0.00184384			-0.00258044	-0.0363642	0.00328576			0.258875	0.024273	-0.000217985
-0.015	0.0165625	0.00235219	0.013125	0.00183594			-0.00250833	-0.0389672	0.00325715			0.259648	0.0244688	-0.000283697
-0.031875	0.0275	0.00246547	0.01375	0.001845			-0.00314512	-0.038923	0.00325384			0.262198	0.0246646	-0.000249269
0.0221875	0.0159375	0.00250172	0.01375	0.00184427			-0.00334073	-0.0369083	0.00321803			0.268853	0.0279287	-0.00042014
0.033125	0.0009375	0.00248002	0.0146875	0.00185449			-0.00268277	-0.032923	0.00316543			0.275044	0.0268189	-0.000447812
0.02375	0.013125	0.0024689	0.01375	0.0018552			-0.00203682	-0.0313494	0.00307733			0.279124	0.0218576	-0.000590025
0.0175	-0.0309375	0.0024676	0.0134375	0.00184965			-0.00225928	-0.0321142	0.00302864			0.280005	0.0220534	-0.000482809
0.0434375	0.016875	0.00244008	0.0153125	0.00187012			-0.00276603	-0.0312612	0.00299861			0.286944	0.025905	-0.000570646
0.006875	0.0071875	0.00242258	0.01625	0.00185376			-0.00318105	-0.0292759	0.00298215			0.290416	0.0263619	-0.000553918
0.034375	-0.0040625	0.00241998	0.01625	0.00186511			-0.00278981	-0.0272024	0.00295971			0.295221	0.0221187	-0.000610012
0.035	0.02125	0.00239649	0.0159375	0.00187694			-0.00371091	-0.0258788	0.00286487			0.294682	0.0212048	-0.000800519
-0.021875	0.0234375	0.0023764	0.01625	0.0018755			-0.00320381	-0.0275994	0.00280533			0.295865	0.0215312	-0.000768747
0.0078125	0.014375	0.00235345	0.015625	0.00186001			-0.00453919	-0.0309524	0.00285513			0.29503	0.0200297	-0.000860034
-0.028125	-0.0303125	0.00233171	0.015625	0.00186503			-0.00442659	-0.0323642	0.00281335			0.29876	0.0225757	-0.000973786
-0.0078125	0.0071875	0.00234243	0.0178125	0.00184968			-0.00384748	-0.0321436	0.00282227			0.301016	0.0266883	-0.0010423
0.015	-0.0009375	0.00232771	0.016875	0.0018417			-0.0034972	-0.0328936	0.00282302			0.299534	0.0225104	-0.0011696
0.0165625	0.01625	0.00231192	0.015625	0.00183538			-0.0034137	-0.0346583	0.00280635			0.296946	0.0188547	-0.00104404
0.0003125	-0.0171875	0.0022882	0.0153125	0.0018129			-0.00366524	-0.0360112	0.00278825			0.294831	0.0224451	-0.00107848
-0.0103125	0.00625	0.00230071	0.01625	0.00180069			-0.00299016	-0.0373201	0.00275601			0.291765	0.0250563	-0.00106738
-0.004375	0.0290625	0.0022812	0.01625	0.0017827			-0.00370407	-0.0375407	0.00277067			0.293701	0.0251216	-0.00100143
0.0028125	0.0334375	0.00226192	0.01625	0.00176336			-0.00285074	-0.0337318	0.00277796			0.295575	0.0230326	-0.000960679
0.0028125	-0.000625	0.0022632	0.01625	0.00174427			-0.00359101	-0.0303641	0.00278872			0.295821	0.0224451	-0.000878164
0.008125	0.0221875	0.0022654	0.01625	0.00173073			-0.00291147	-0.03057	0.00271996			0.293576	0.0200297	-0.000815864
0.008125	-0.0075	0.00225413	0.0153125	0.00171735			-0.00349862	-0.0308936	0.00267437			0.290045	0.0180713	-0.000868443
-0.0025	0.015	0.00224457	0.0171875	0.00169852			-0.00385914	-0.0287024	0.00266141			0.289037	0.0227062	-0.000713942
-0.020625	-0.01	0.00223293	0.0184375	0.00169805			-0.00381193	-0.0264229	0.00268765			0.28964	0.0238813	-0.000756118
0.001875	-0.0009375	0.00223145	0.0175	0.00167883			-0.00421935	-0.0238935	0.00262914			0.28833	0.0181366	-0.000640097
-0.005	0.0765625	0.00223029	0.0171875	0.00166297			-0.00494956	-0.0238641	0.00263386			0.28774	0.0157865	-0.000676967
0.0040625	-0.000625	0.00222071	0.0178125	0.00164638			-0.00507119	-0.0252023	0.0026175			0.294187	0.0180061	-0.000790659
-0.000625	-0.0053125	0.00223375	0.0178125	0.00162655			-0.00490426	-0.0288494	0.00266817			0.295881	0.0183977	-0.000816321
-0.025	-0.0203125	0.0022235	0.0175	0.00163135			-0.0047017	-0.0290406	0.00265997			0.29559	0.0178755	-0.000798617
0.0378125	0.0140625	0.00220369	0.018125	0.00164889			-0.00445163	-0.0281288	0.00259929			0.295863	0.0215312	-0.000743789
-0.019375	0.018125	0.00221507	0.01875	0.00164779			-0.00397457	-0.0294377	0.00257646			0.296221	0.0197686	-0.000653076
-0.01125	-0.019375	0.00219568	0.0165625	0.00163857			-0.00335579	-0.0309524	0.00255682			0.29899	0.0161129	-0.000662035
0.011875	0.0146875	0.00218934	0.01625	0.00163009			-0.00354648	-0.0325259	0.0025545			0.297351	0.0181366	-0.000837893
0.0096875	0.023125	0.00218777	0.0184375	0.00161952			-0.0022603	-0.0332318	0.00253854			0.298419	0.0223146	-0.000769351
-0.0125	-0.00625	0.00217153	0.0178125	0.00161191			-0.00174428	-0.0310112	0.00246727			0.298697	0.0219882	-0.00075949
-0.033125	-0.00125	0.00216486	0.0171875	0.00162501			-0.00149247	-0.0271876	0.00250929			0.298586	0.0157865	-0.00071993
-0.00375	-0.0475	0.00218297	0.016875	0.00160857			-0.00122147	-0.0248053	0.00253701			0.298938	0.0168963	-0.000698495
0.0465625	0	0.00218211	0.0178125	0.00163515			-0.00106081	-0.0255406	0.00256449			0.301208	0.0159824	-0.000741382
0.025625	0.0271875	0.00216125	0.0171875	0.00164047			-0.000858275	-0.0245259	0.00251651			0.300284	0.0150032	-0.000691414
0.00125	0.02625	0.00216971	0.0175	0.00162134			-0.00152556	-0.0219376	0.00250336			0.298281	0.0167657	-0.000663072
-0.00875	0.0371875	0.00215964	0.0196875	0.00160995			-0.00109178	-0.0197464	0.00240098			0.302726	0.0193769	-0.000581142
0.015	0.0053125	0.0021625	0.0190625	0.00160495			-0.00193547	-0.0177905	0.00237594			0.307327	0.0144809	-0.000592551
-0.0125	0.02125	0.00214813	0.0175	0.00159751			-0.00176671	-0.0176582	0.00234263			0.310627	0.0107599	-0.000787166
0.005	-0.01	0.00214614	0.01875	0.00158267			-0.00147384	-0.0203052	0.00241307			0.311946	0.0144809	-0.000621486
0.016875	-0.0059375	0.00212198	0.0190625	0.00157988			-0.00196418	-0.0227023	0.00238572			0.312603	0.0170269	-0.000671034
0.025	0.04	0.00211374	0.01875	0.00158526			-0.00177197	-0.0224376	0.00237057			0.315551	0.0159824	-0.00065695
-0.0028125	0.0296875	0.00209655	0.0184375	0.00156838			-0.00152367	-0.0211729	0.00236163			0.317619	0.014742	-0.00060803
-0.0009375	0.0146875	0.00207707	0.01875	0.00154983			-0.00193412	-0.0228053	0.00233544			0.316798	0.0159824	-0.000669675
0.0328125	0.015	0.00209158	0.0178125	0.00156339			-0.00239334	-0.0251876	0.00233745			0.320469	0.0125225	-0.000629156
0.0078125	-0.0190625	0.00207591	0.016875	0.00155178			-0.0015763	-0.0264082	0.00228779			0.326705	0.0131753	-0.000636338
0.00375	0.014375	0.00206106	0.0175	0.00153626			-0.00163056	-0.0263935	0.00225633			0.329949	0.0188547	-0.000595195
-0.0665625	0.0165625	0.00203733	0.0184375	0.00158373			-0.00154485	-0.0230258	0.00225967			0.328767	0.0192464	-0.000517998
-0.0253125	0.0059375	0.00203827	0.0175	0.00158937			-0.00180651	-0.0192464	0.00225782			0.329608	0.0116739	-0.000451614
-0.023125	0.0090625	0.00203733	0.0171875	0.00159275			-0.00182328	-0.0176287	0.00218993			0.328231	0.0117391	-0.000493159
0.0240625	0.033125	0.00201702	0.018125	0.00159703			-0.00202608	-0.0176434	0.00225544			0.330401	0.0141545	-0.000589166
0.0203125	0.00375	0.00199915	0.0184375	0.00159751			-0.00183772	-0.0174229	0.00220656			0.33529	0.0138281	-0.000560279
-0.0015625	0.00625	0.00197807	0.0178125	0.00157922			-0.0023474	-0.0149964	0.0021254			0.335483	0.0125225	-0.000477291
0.0034375	0.0034375	0.00197224	0.01875	0.00156304			-0.00183183	-0.0120699	0.00210735			0.337785	0.0140892	-0.000581275
0.006875	0.0021875	0.00202962	0.019375	0.0015505			-0.00166358	-0.0111287	0.00212609			0.342364	0.0120655	-0.00064818
0.016875	0.0340625	0.00204534	0.0178125	0.00154812			-0.00189992	-0.0122169	0.00208127			0.34375	0.0075612	-0.000608964
0.0140625	0.065625	0.00209462	0.0178125	0.00154295			-0.00197709	-0.0147905	0.00205799			0.345487	0.0106294	-0.000426567
0.011875	0.122188	0.00209892	0.0190625	0.00153566			-0.00311069	-0.016864	0.00206531			0.345188	0.0150032	-0.000520549
-0.0021875	-0.0225	0.00209597	0.01875	0.00151877			-0.00317898	-0.015614	0.00210391			0.345562	0.0137628	-0.000505481
0.0375	0.0371875	0.00209431	0.0178125	0.0015374			-0.00312252	-0.015467	0.00207129			0.344039	0.00965017	-0.000518867
-0.015	0.0253125	0.00207829	0.0184375	0.0015333			-0.00341845	-0.0169964	0.00208809			0.341858	0.0104335	-0.00044184
-0.003125	0.0384375	0.00205747	0.0171875	0.00151738			-0.00312045	-0.0198935	0.00201938			0.339728	0.0121961	-0.000564418
0.015625	0.006875	0.00205473	0.0165625	0.00151416			-0.00350953	-0.0210552	0.00200492			0.337963	0.0101071	-0.000520278
0.0340625	-0.0196875	0.00205233	0.016875	0.00152941			-0.00317884	-0.0196435	0.00199859			0.335943	0.0150032	-0.000409002
0.0096875	0.0071875	0.00203934	0.01875	0.0015201			-0.00289151	-0.0153934	0.002084			0.335875	0.0157212	-0.000378204
-0.00875	0.011875	0.00202556	0.0178125	0.00150997			-0.00265162	-0.0129081	0.00206664			0.334862	0.0095849	-0.00044011
-0.019375	0.03375	0.00202259	0.0165625	0.00151058			-0.00280026	-0.0123787	0.00204844			0.333625	0.00645144	-0.000409703
-0.0084375	-0.0046875	0.00200122	0.0178125	0.00150026			-0.00286394	-0.0128199	0.00205927			0.333381	0.0113475	-0.000432578
0.0246875	0.0059375	0.00198823	0.01875	0.00150631			-0.00227655	-0.0120552	0.00211297			0.332132	0.0116739	-0.000433904
0.0175	-0.02125	0.00199478	0.0184375	0.0015051			-0.00208892	-0.00809925	0.00202344			0.333488	0.00886681	-0.00045181
-0.005	-0.015625	0.0019825	0.01875	0.0014914			-0.00211834	-0.00614335	0.0020368			0.332528	0.00971545	-0.000528621
0.01	0.0109375	0.00196631	0.0190625	0.00148287			-0.00248293	-0.00542276	0.00200022			0.334374	0.00743065	-0.000548462
-0.0003125	0.00625	0.00197157	0.0184375	0.00146477			-0.00331243	-0.00862867	0.00193378			0.337018	0.00553751	-0.000661158
0.010625	0.0040625	0.00194771	0.0175	0.00145719			-0.00322506	-0.0105846	0.00187844			0.339645	0.00795289	-0.000549688
-0.001875	0.0178125	0.0019382	0.01875	0.00144097			-0.00368826	-0.011511	0.00184272			0.336436	0.0134364	-0.000681039
-0.0040625	0.0015625	0.00193975	0.0196875	0.00142713			-0.00368242	-0.0102757	0.00183659			0.333578	0.0116086	-0.000691986
0.0046875	-0.00375	0.00193534	0.0175	0.00141409			-0.00407529	-0.0115699	0.00183293			0.331609	0.00599448	-0.000536305
0.013125	0.03375	0.00192317	0.01625	0.00140965			-0.0037776	-0.0139964	0.00179894			0.332534	0.00769176	-0.000666007
-0.018125	0.036875	0.00192397	0.016875	0.00141026			-0.00376218	-0.0156875	0.00182824			0.333052	0.00945433	-0.000616716
0	-0.0028125	0.00197038	0.018125	0.00139274			-0.00435415	-0.0167611	0.00184122			0.335305	0.00847513	-0.000634427
0.0075	0.0196875	0.00229685	0.0175	0.00138294			-0.00357201	-0.0145258	0.00188126			0.337459	0.0106294	-0.000664882
0.0028125	0.0071875	0.00240988	0.0178125	0.00136858			-0.00367921	-0.010864	0.00187588			0.339213	0.00997658	-0.000631165
-0.0221875	0.01	0.00244432	0.018125	0.00137376			-0.0041914	-0.0094375	0.00182822			0.338281	0.00697368	-0.000579973
0.018125	-0.0021875	0.00244239	0.018125	0.00137482			-0.00377375	-0.00965809	0.00180924			0.335232	0.00142486	-0.000628481
0.024375	0.0128125	0.00241392	0.018125	0.00138212			-0.00332435	-0.0091875	0.00178045			0.335194	0.00494999	-0.000603255
0.0028125	0.0003125	0.00239113	0.0196875	0.00136776			-0.00346155	-0.00681983	0.00178637			0.338637	0.00814873	-0.000597792
0.010625	-0.0128125	0.0023883	0.02125	0.0013614			-0.00257737	-0.00499629	0.001825			0.348886	0.00475415	-0.000616256
0.031875	0.0225	0.00238769	0.019375	0.00137636			-0.00268076	-0.00362863	0.00176645			0.356009	0.000967895	-0.000761822
0.011875	-0.0065625	0.00236303	0.0190625	0.00137114			-0.00231574	-0.00339333	0.00182051			0.361096	0.0016207	-0.000851898
0.01125	0.023125	0.00234899	0.020625	0.00136536			-0.00154044	-0.00709924	0.00182921			0.360749	0.00135957	-0.000751025
0.02	0.003125	0.00235075	0.0196875	0.0013684			-0.000906384	-0.0105552	0.00179392			0.365292	0.00149014	-0.000704308
0.005625	0	0.00232217	0.02	0.00135702			-0.000594183	-0.00995221	0.00185593			0.36901	0.00397079	-0.000618234
0.01625	-0.0253125	0.00230239	0.020625	0.00135641			-0.000604463	-0.0100846	0.00190333			0.373068	0.00494999	-0.000519227
0.000625	0.0259375	0.00228285	0.0209375	0.00134019			0.000179583	-0.0110993	0.00192297			0.380102	-0.000468273	-0.000383327
0.056875	-0.02375	0.00226105	0.0184375	0.00138042			9.19733e-05	-0.0137169	0.00189873			0.389334	-0.00242668	-0.000349218
-0.0040625	-0.0109375	0.00224047	0.019375	0.00136733			0.000981259	-0.0158346	0.00192059			0.392593	0.00116373	-0.000296601
0.016875	-0.0053125	0.00221639	0.02	0.00136722			0.00068206	-0.0160111	0.00195065			0.394773	0.00325271	-0.000244896
0.0140625	0.015	0.00230948	0.019375	0.0013643			0.000948361	-0.013364	0.00189329			0.402542	0.000641493	-0.000274745
0.01125	-0.009375	0.0024136	0.0203125	0.0013586			0.000699592	-0.00971691	0.0019359			0.40962	-0.0013822	-0.000303706
0.0340625	-0.01625	0.00240768	0.0203125	0.00137579			0.000596285	-0.00927573	0.00191489			0.420046	-0.00360173	-0.000379763
0.0278125	0.0009375	0.00240371	0.0203125	0.00138651			0.000386522	-0.00989338	0.00192084			0.428727	-0.00627822	-0.000369038
0.008125	-0.0078125	0.00240729	0.02	0.00137741			6.08494e-05	-0.00955515	0.00189107			0.43326	-0.00497261	-0.000311506
0.0246875	0.129375	0.0023827	0.0225	0.00138499			0.000250985	-0.00720219	0.0018341			0.432362	-0.00118636	-0.000451521
-0.0015625	-0.179063	0.0023731	0.0234375	0.00136935			-8.76224e-05	-0.00523158	0.00186804			0.432387	-0.00379757	-0.000438348
0.0025	0.0275	0.00237549	0.02125	0.00135484			7.973e-05	-0.0043051	0.00184238			0.434175	-0.0115659	-0.000415744
0.0128125	0.0075	0.00236317	0.021875	0.00135082			0.000155736	-0.00508452	0.00187721			0.432665	-0.0116312	-0.00043621
0.000625	0.03875	0.00235194	0.0225	0.00133466			-0.000559548	-0.00923161	0.00190319			0.437227	-0.00908527	-0.000392626
0.0178125	-0.0634375	0.00233398	0.0228125	0.0013359			-0.00049484	-0.0113346	0.00186331			0.44043	-0.0099992	-0.00036255
0.033125	0.0503125	0.00232623	0.023125	0.00135243			-0.000733381	-0.0109081	0.00185108			0.444141	-0.00993392	-0.000449547
0.01875	0.0021875	0.00229952	0.023125	0.00135438			-0.00138298	-0.0108493	0.00188288			0.443839	-0.00915055	-0.000452995
-0.006875	-0.008125	0.0023019	0.023125	0.00134443			-0.000678535	-0.0129964	0.00189524			0.445744	-0.014373	-0.000562467
-0.0075	-0.0078125	0.00227861	0.0209375	0.00133523			-0.00104638	-0.0158199	0.00185236			0.44755	-0.0174412	-0.000413323
0.0153125	-0.0125	0.00225187	0.0221875	0.00133395			-0.000383065	-0.0179964	0.00180177			0.453888	-0.0143077	-0.000387917
0.005625	-0.0159375	0.0022264	0.0225	0.00132301			-0.000176634	-0.0169817	0.00174322			0.465196	-0.012741	-0.000456705
0.02625	-0.02	0.00225499	0.0225	0.00133282			0.000762164	-0.0136434	0.00175901			0.473614	-0.0182245	-0.000321323
0.0025	0.0375	0.00229104	0.0228125	0.00131877			0.0010875	-0.0108199	0.00173167			0.476926	-0.0209663	-0.00016506
0.0003125	0.0446875	0.00228477	0.0221875	0.0013027			0.000733112	-0.010261	0.00177909			0.476425	-0.0224025	-2.73361e-05
0.0384375	-0.0946875	0.00229389	0.0225	0.00132495			0.000734048	-0.011364	0.00178251			0.47853	-0.025797	4.95497e-05
-0.0003125	0.0425	0.00226789	0.0225	0.00130881			0.000898891	-0.0100846	0.00178835			0.481842	-0.0247525	0.000174235
-0.0028125	-0.0746875	0.00225535	0.0253125	0.00129536			0.000617645	-0.00745219	0.00185797			0.485814	-0.0248831	0.000178597
0.0053125	0.023125	0.00222983	0.0253125	0.00128458			0.00105867	-0.00604041	0.00186369			0.49704	-0.0284082	0.000207801
0.0140625	-0.0078125	0.00220744	0.0240625	0.00128269			0.000301386	-0.00599629	0.00191455			0.496583	-0.0345446	0.000318072
-0.009375	0.016875	0.00219658	0.02375	0.00127613			2.83344e-05	-0.00781984	0.00188434			0.495968	-0.034871	0.000451351
-0.00625	-0.0053125	0.00216992	0.0246875	0.00126653			0.000340466	-0.0114669	0.00196784			0.493457	-0.0321292	0.000539406
-0.011875	0.001875	0.00215297	0.0246875	0.00126267			0.00051482	-0.0123787	0.00194911			0.496584	-0.035328	0.000614697
-0.024375	-0.0034375	0.00213653	0.025	0.00127136			0.00072779	-0.0124522	0.00196135			0.500967	-0.0364377	0.000643152
0.0109375	0.0034375	0.00211437	0.024375	0.0012665			0.00110742	-0.0127463	0.00194826			0.506972	-0.0372864	0.000700817
0.0015625	0.0196875	0.00210529	0.0228125	0.00125233			0.00083205	-0.0142905	0.00193603			0.512774	-0.0410073	0.000692933
0.000625	0.016875	0.00212414	0.0228125	0.0012374			0.000663222	-0.0173493	0.00185718			0.512019	-0.0451853	0.000685665
-0.015	0.029375	0.00210838	0.0240625	0.00123703			0.000491105	-0.0184229	0.00184158			0.512831	-0.0437491	0.000674339
0.0103125	0.0009375	0.00210344	0.0234375	0.00123197			0.000857519	-0.0167317	0.00186024			0.517658	-0.0415949	0.000754178
0.0084375	0.0084375	0.00208106	0.0246875	0.00122511			0.000821506	-0.0134816	0.0017634			0.529253	-0.048841	0.000823171
0.001875	0.0046875	0.00205614	0.023125	0.00121176			0.001427	-0.0101287	0.00176352			0.538716	-0.0539981	0.000889492
0.0084375	0.02125	0.00205498	0.023125	0.00120515			0.00161478	-0.0107316	0.00174348			0.541728	-0.0539328	0.00100167
-0.010625	-0.0196875	0.00204445	0.024375	0.0012008			0.00236203	-0.0111728	0.00171837			0.541567	-0.0552384	0.000957889
-0.02	0.00125	0.0020453	0.0246875	0.00120589			0.00214187	-0.00926103	0.00164713			0.545364	-0.058633	0.000823889
-0.0646875	-0.005	0.00203052	0.025	0.00125559			0.00172744	-0.00671689	0.00165734			0.543131	-0.0594164	0.000698555
-0.0196875	0.0121875	0.00203592	0.0259375	0.00125968			0.000638631	-0.0040551	0.00165597			0.541385	-0.0618318	0.000807398
-0.00125	-0.015	0.00201688	0.025	0.00124529			0.000188235	-0.00459922	0.00165736			0.548234	-0.0685556	0.000804155
0.0203125	0.0071875	0.00200652	0.0240625	0.00125013			0.000672301	-0.00855514	0.00157122			0.555087	-0.0714932	0.000938397
-0.000625	0	0.00199034	0.025	0.00123523			0.00138123	-0.010114	0.00157693			0.569501	-0.0667931	0.000977093
-0.0090625	0.00625	0.00199812	0.0253125	0.00122894			0.00128254	-0.0104816	0.0015893			0.571597	-0.0681639	0.00108403
0.01125	-0.001875	0.00197986	0.0253125	0.00122493			0.00133745	-0.00962868	0.00159689			0.578649	-0.0741045	0.00113855
0.0146875	0.0059375	0.00195901	0.02375	0.0012244			0.000890682	-0.0106434	0.00159849			0.580389	-0.0775643	0.00126838
0.0209375	0.0103125	0.0019553	0.0246875	0.00123013			0.00121519	-0.0131875	0.00165616			0.583079	-0.0770421	0.00142383
-0.004375	0.033125	0.00195133	0.0246875	0.00121922			0.00189352	-0.0149964	0.00169902			0.583517	-0.0805672	0.00155193
0.02375	-0.0065625	0.00194052	0.0240625	0.00122783			0.00201318	-0.0150699	0.00163866			0.587264	-0.0815464	0.00164706
0.0025	0.0353125	0.00192736	0.0240625	0.00121507			0.00173194	-0.011864	0.00159528			0.592037	-0.0815464	0.0016837
0.030625	0.004375	0.00190998	0.025	0.0012306			0.00121025	-0.00830514	0.00161443			0.596761	-0.086116	0.00199269
0.02625	-0.015	0.00189562	0.02375	0.00124157			0.00119063	-0.00636394	0.00153834			0.608563	-0.0929705	0.002024
0.00375	0.0109375	0.00191864	0.0228125	0.00122989			0.00052021	-0.00730513	0.00147863			0.619473	-0.0948636	0.00198049
0.034375	0.0215625	0.00189731	0.025	0.00124899			0.000172098	-0.00640806	0.00145868			0.623959	-0.0914037	0.00207263
-0.00375	0.03875	0.00191217	0.0259375	0.00123723			-0.00065113	-0.00365804	0.00147286			0.638019	-0.0947983	0.00209309
0.0046875	0.0240625	0.00190373	0.0246875	0.00122654			-0.000788449	-0.00130508	0.00150621			0.652198	-0.101261	0.00204509
0.024375	0.01125	0.00190571	0.025	0.00123568			-0.00112492	0.000297874	0.00142697			0.659139	-0.102697	0.00197979
-0.0078125	-0.00875	0.00190016	0.0253125	0.00122815			-0.000844642	-0.0008639	0.00140334			0.666313	-0.105635	0.00197028
0.0053125	0.00375	0.00191937	0.0246875	0.0012182			-0.0012566	-0.00462864	0.00144549			0.67008	-0.109421	0.00199668
0.035625	-0.02375	0.0019399	0.0240625	0.00123869			-0.00199821	-0.0055257	0.00144062			0.679433	-0.10916	0.00184303
-0.0165625	-0.00375	0.00192955	0.0253125	0.00123987			-0.00148698	-0.00498158	0.00145094			0.686133	-0.107071	0.00180747
-0.0021875	0.0259375	0.00194996	0.025	0.00122666			-0.00174167	-0.00490805	0.0013919			0.695085	-0.112816	0.00175394
0.0471875	0.01125	0.0019648	0.023125	0.0012586			-0.00132289	-0.00680512	0.00138255			0.699202	-0.119278	0.00164351
0.0071875	0.0096875	0.00194446	0.0228125	0.00125016			-0.00166581	-0.0084669	0.00138862			0.710199	-0.117189	0.00180648
0.0296875	-0.0125	0.00193218	0.0240625	0.00126432			-0.00181207	-0.0104669	0.00140438			0.721285	-0.117385	0.00184944
-0.019375	-0.0034375	0.00193786	0.0228125	0.00126798			-0.00207811	-0.0094375	0.00135474			0.730112	-0.122542	0.00167972
-0.0034375	0.006875	0.00192285	0.0228125	0.00125567			-0.00181215	-0.00524629	0.0013188			0.734193	-0.124566	0.00160574
0.0109375	0.0171875	0.00191053	0.02375	0.00125101			-0.00204125	-0.0020992	0.00129757			0.735648	-0.1277	0.00154486
0.006875	0.0084375	0.00189023	0.0234375	0.00124235			-0.00199815	-0.00220215	0.00135114			0.739425	-0.133444	0.00165071
0.016875	-0.0353125	0.00186831	0.0228125	0.00124379			-0.00308378	-0.00262862	0.00132074			0.741707	-0.136774	0.0016414
-0.005	0.0153125	0.00189386	0.0234375	0.00123334			-0.00266296	-0.000613898	0.0012729			0.744787	-0.133705	0.00159564
0.0271875	0.001875	0.00188408	0.025	0.0012452			-0.00199187	0.00195965	0.00125487			0.753779	-0.135794	0.00162591
0.02625	-0.0046875	0.00188411	0.025	0.00125599			-0.00290673	0.00412143	0.00114329			0.765441	-0.142845	0.00174684
0.0078125	-0.0309375	0.00186665	0.0240625	0.0012482			-0.00259507	0.00420967	0.00108644			0.771779	-0.146043	0.00173296
0.0134375	0.005625	0.00189377	0.0240625	0.00124613			-0.003043	0.00254789	0.00102439			0.778386	-0.14637	0.00169981
0	-0.0090625	0.00188806	0.025	0.00123065			-0.00343305	-0.00105508	0.00104192			0.79213	-0.149503	0.0019404
-0.0159375	0.0075	0.00188492	0.0234375	0.0012313			-0.00345963	-0.000981547	0.000993865			0.801628	-0.149307	0.00201903
-0.0153125	0.015	0.00188213	0.0234375	0.00123132			-0.00395377	-0.000613898	0.000939336			0.801849	-0.149242	0.0020482
-0.00125	0.00625	0.00187031	0.0240625	0.00121727			-0.00392924	-0.000702133	0.000949688			0.808247	-0.155574	0.00209515
0.00375	0.016875	0.00186333	0.0221875	0.0012059			-0.00401506	-0.00395216	0.00094741			0.82436	-0.160209	0.00205491
0.010625	-0.0003125	0.00186455	0.0221875	0.00120154			-0.00367887	-0.006011	0.000963329			0.83826	-0.159687	0.00219073
0.018125	0.0240625	0.00184952	0.023125	0.00120474			-0.00384553	-0.00605512	0.000942888			0.844657	-0.156815	0.00230256
0.01875	-0.0153125	0.00186654	0.023125	0.00120853			-0.00350913	-0.00442275	0.000970606			0.85397	-0.161972	0.00233598
-0.015625	0.006875	0.00187773	0.0225	0.00120914			-0.00362788	-0.000334484	0.000913562			0.859136	-0.167651	0.00227225
-0.01375	0.003125	0.00190784	0.023125	0.00120787			-0.0036582	0.00225377	0.000897244			0.864628	-0.170458	0.00225315
0.005625	-0.0003125	0.00194664	0.023125	0.00119849			-0.00392054	0.00101847	0.00088884			0.87728	-0.172808	0.00222546
0.01625	-0.0284375	0.00193809	0.0221875	0.00119985			-0.00452516	0.0011067	0.000872888			0.885689	-0.176072	0.00235501
0.024375	0.0140625	0.00191526	0.023125	0.00120932			-0.00539932	0.00459203	0.000864203			0.915577	-0.176399	0.00234681
-0.0515625	-0.0296875	0.00191303	0.025	0.00124586			-0.00553614	0.00685675	0.000939051			0.940847	-0.176856	0.00239031
0.013125	0.008125	0.00189708	0.02375	0.00124351			-0.00553198	0.00810676	0.000862652			0.951897	-0.183449	0.0024172
0.0021875	-0.0209375	0.00190945	0.0228125	0.00123025			-0.00562175	0.00706264	0.000923031			0.972094	-0.18828	0.00243882
-0.000625	0.0215625	0.00191854	0.0234375	0.00121559			-0.00519941	0.0050185	0.000986456			0.994264	-0.186321	0.00250971
0.01125	0.0434375	0.0019219	0.02375	0.00121174			-0.00490238	0.00254789	0.00101393			1.02351	-0.18593	0.00252889
-0.0171875	0.01	0.00191428	0.023125	0.00121388			-0.00405186	0.00247436	0.00102505			1.04079	-0.189194	0.00260955
0.00375	0.013125	0.00191143	0.023125	0.00120255			-0.00378985	0.00253319	0.000998755			1.04675	-0.19076	0.00259014
0.010625	-0.0153125	0.00191331	0.023125	0.00119824			-0.003812	0.00112141	0.00100866			1.05015	-0.19409	0.00257201
0.0359375	0.0121875	0.00193923	0.023125	0.00121929			-0.00395546	-0.00146685	0.00104304			1.05904	-0.19768	0.00255878
-0.029375	0.0253125	0.00195327	0.0215625	0.00123352			-0.00424643	-0.00317274	0.00109423			1.07397	-0.199834	0.0025094
0.01625	-0.004375	0.00193401	0.0221875	0.00123445			-0.00446761	-0.00384922	0.0011224			1.07777	-0.197615	0.00256463
0.01625	0.03375	0.00192592	0.023125	0.00123536			-0.00387337	-0.0013492	0.0011969			1.09172	-0.199377	0.00238396
-0.004375	0.005625	0.00190949	0.021875	0.00122439			-0.00435314	0.00244495	0.00115896			1.10396	-0.206689	0.00235983
0	-0.030625	0.00192609	0.0225	0.00120918			-0.00486004	0.00353319	0.00121717			1.12642	-0.2093	0.00244311
0.0009375	0.01	0.00198185	0.0234375	0.0011951			-0.00517518	0.00225377	0.00129009			1.13826	-0.210018	0.0023542
0.005	-0.02	0.0020016	0.0234375	0.00118525			-0.0054056	0.00318025	0.00126115			1.15708	-0.21289	0.00243262
-0.02125	-0.119687	0.00198174	0.024375	0.00119178			-0.00518065	0.00560674	0.00133796			1.17581	-0.215632	0.00249062
-0.000625	0.070625	0.00195806	0.025	0.0011776			-0.00549796	0.00763617	0.00145652			1.18955	-0.216024	0.00254297
0.001875	-0.0621875	0.00194342	0.024375	0.00116484			-0.0057336	0.00885677	0.00146115			1.21868	-0.220332	0.00259726
0.0234375	0.020625	0.00193897	0.02375	0.00117381			-0.0060048	0.00676851	0.0015051			1.24286	-0.226338	0.00270197
-0.0084375	0.0059375	0.00192051	0.0246875	0.00116767			-0.00654121	0.0035332	0.00152729			1.26369	-0.225228	0.00273095
0.015625	0.0178125	0.00189946	0.0246875	0.00116879			-0.00744496	0.00195965	0.00154909			1.27948	-0.223792	0.00283866
0.018125	0.011875	0.00187962	0.025625	0.00117239			-0.00746941	0.00235671	0.00155374			1.30081	-0.225359	0.00286775
0.0053125	0.059375	0.00189002	0.024375	0.00116314			-0.00726654	0.00165083	0.00160028			1.33352	-0.230385	0.00303834
0.005	-0.127188	0.0018781	0.024375	0.00115369			-0.00744173	-0.000731546	0.00161837			1.35736	-0.231887	0.00309245
-0.0028125	0.0746875	0.0019029	0.0234375	0.00114218			-0.00735464	-0.00371686	0.00162303			1.36916	-0.233845	0.00310127
0.0071875	0.0071875	0.00190426	0.02375	0.00113517			-0.00714087	-0.00506982	0.00160877			1.37018	-0.237827	0.00316315
0.0228125	-0.010625	0.00189717	0.0240625	0.00114389			-0.00728377	-0.00421687	0.00163709			1.37358	-0.234106	0.00309045
0.0190625	-0.07375	0.00188485	0.025625	0.00114874			-0.00707012	-0.0010992	0.00166139			1.38112	-0.236914	0.00320096
0.01125	0.015625	0.00189206	0.0253125	0.00114572			-0.00694685	0.00129788	0.00168964			1.4045	-0.24416	0.00333733
-0.0125	-0.01125	0.00187231	0.0240625	0.00114399			-0.00633721	0.00129788	0.00176125			1.44184	-0.249252	0.00347978
0.0225	0.0265625	0.00186686	0.0253125	0.00115228			-0.00664708	0.001092	0.00178324			1.47481	-0.245074	0.00379706
-0.0234375	-0.005625	0.00188055	0.02625	0.0011614			-0.00680457	0.0025626	0.00177598			1.49951	-0.245987	0.00379091
0.0240625	-0.0071875	0.00187219	0.0275	0.00117103			-0.00666999	0.00412144	0.00177062			1.52763	-0.252646	0.00377706
0.01625	0.02875	0.00186768	0.0275	0.00117274			-0.00637084	0.00679793	0.00177918			1.54672	-0.253821	0.00393687
0.006875	-0.0334375	0.00185792	0.0265625	0.00116505			-0.00574296	0.00563615	0.00180615			1.55963	-0.257803	0.00393547
-0.0090625	0.028125	0.00185734	0.0275	0.00115964			-0.00664278	0.00370967	0.00175117			1.56718	-0.263091	0.00393408
0.0165625	0.0365625	0.00183677	0.0259375	0.00116179			-0.00639399	0.000224345	0.00171299			1.57853	-0.262112	0.00415133
0.009375	0.000625	0.0018177	0.0271875	0.00115674			-0.00645766	-0.000260953	0.0017572			1.60618	-0.258848	0.00426396
0.015625	-0.02625	0.00182606	0.028125	0.00115799			-0.00673526	-0.000555074	0.0017255			1.65719	-0.262373	0.0044364
-0.0265625	0.026875	0.00181275	0.0271875	0.00117017			-0.00667156	-0.00195214	0.0016877			1.67769	-0.26877	0.00455664
0.0025	-0.0153125	0.00179554	0.0259375	0.00115813			-0.00664174	-0.00417275	0.00164389			1.69078	-0.270011	0.00466994
-0.00125	0.0028125	0.00178324	0.02625	0.001145			-0.00708328	-0.00618747	0.00152234			1.71009	-0.26988	0.00469651
-0.0146875	0.015625	0.00176984	0.02625	0.00114546			-0.00716994	-0.00746689	0.00152387			1.71902	-0.273536	0.00468334
-0.00625	0.00625	0.00178848	0.02625	0.00113748			-0.00748794	-0.00571688	0.00150284			1.72607	-0.274254	0.00486612
0.0278125	-0.0153125	0.0017872	0.0271875	0.00115116			-0.00753725	-0.00218744	0.0015954			1.75475	-0.273862	0.00475593
-0.0071875	0.0203125	0.00178312	0.0271875	0.00114405			-0.00764213	-0.000746252	0.0015969			1.7796	-0.280521	0.00484134
0.00125	-0.011875	0.00180409	0.0253125	0.00113109			-0.00784267	-0.00152567	0.00152717			1.80817	-0.2862	0.00506054
-0.0003125	-0.0203125	0.00178293	0.02625	0.00111735			-0.00783294	-0.000599192	0.00151433			1.84204	-0.284503	0.00525654
-0.02125	0.00625	0.00177641	0.028125	0.00112472			-0.00733773	0.000444934	0.00143137			1.87017	-0.283263	0.00526986
-0.030625	0.0178125	0.00177247	0.02875	0.00114138			-0.00708724	0.00234201	0.00149584			1.88392	-0.290248	0.00519407
0.0053125	0.0328125	0.00177858	0.0278125	0.00113251			-0.00743858	0.00373908	0.00157154			1.88963	-0.293381	0.00530178
0.01375	0.0171875	0.00178336	0.0278125	0.00113219			-0.00693365	0.00344496	0.00161254			1.89849	-0.295339	0.00537289
0.039375	0.0128125	0.00177964	0.028125	0.0011575			-0.0074108	0.000680231	0.00159333			1.92427	-0.298669	0.00551522
0.0340625	0.00625	0.0017766	0.0271875	0.00117719			-0.00690699	-0.00234921	0.00151324			1.93598	-0.300497	0.00537076
-0.0165625	0.0221875	0.00178015	0.028125	0.00117912			-0.00708049	-0.00252568	0.00151997			1.93331	-0.297885	0.00538837
0.0353125	0.0109375	0.00178648	0.0290625	0.00119979			-0.00713025	-0.00190803	0.00145464			1.93082	-0.299126	0.00524783
0.009375	0.0196875	0.0017646	0.0271875	0.00119426			-0.00812904	-0.00346686	0.00151298			1.93346	-0.306763	0.00532532
0.0096875	0.005	0.0018183	0.0259375	0.00118911			-0.00819194	-0.00633453	0.00145633			1.95255	-0.310158	0.00547601
0.015625	0.0359375	0.00188509	0.0265625	0.00118997			-0.00843029	-0.00776101	0.0015098			1.96358	-0.306568	0.00540181
-0.0246875	0.0240625	0.00191292	0.0265625	0.00119987			-0.00840248	-0.00829043	0.00145768			1.99464	-0.307873	0.00537261
-0.0040625	-0.0021875	0.00193229	0.0265625	0.00118903			-0.00862205	-0.00609924	0.00148666			2.0006	-0.310354	0.00560362
-0.006875	0.0078125	0.00193797	0.0275	0.00118113			-0.00840948	-0.00246685	0.00143068			2.00648	-0.313618	0.00567721
0.0171875	0.0034375	0.0019464	0.0271875	0.00118365			-0.00758543	-0.000790369	0.001519			2.02431	-0.317274	0.00565782
-0.0203125	-0.0128125	0.00196003	0.026875	0.00118926			-0.00771972	-0.00112861	0.00159383			2.03355	-0.323149	0.00573618
0.0015625	-0.004375	0.00195131	0.026875	0.00117605			-0.00774923	-0.000393307	0.00155416			2.0586	-0.321647	0.00563747
0.0021875	-0.0025	0.00194207	0.02875	0.00116363			-0.0063385	0.00187142	0.00149262			2.07758	-0.319036	0.00551614
-0.0065625	0.0178125	0.00193825	0.0290625	0.00115573			-0.0054686	0.00362143	0.00148745			2.0876	-0.325042	0.00552987
-0.0159375	-0.0096875	0.00192512	0.028125	0.00115731			-0.00579311	0.00541556	0.00149088			2.10357	-0.331048	0.00561034
-0.0015625	-0.0178125	0.00191151	0.0278125	0.0011445			-0.00688932	0.00437144	0.00149379			2.12721	-0.331962	0.00563067
-0.0240625	-0.01625	0.00189902	0.0284375	0.00115435			-0.00662592	0.000444936	0.00155994			2.14772	-0.330591	0.00571559
-0.0084375	0.006875	0.00188637	0.0278125	0.00114844			-0.00567704	-0.00149626	0.00158438			2.18758	-0.331439	0.0056978
0.0215625	-0.0075	0.00188075	0.0284375	0.00115574			-0.00553184	-5.50698e-05	0.00162358			2.20481	-0.332876	0.00577203
0.0084375	-0.0103125	0.00186676	0.028125	0.00114982			-0.00573242	0.000253757	0.00166084			2.21171	-0.333202	0.00590576
-0.0090625	-0.0090625	0.00184888	0.0275	0.0011446			-0.00559884	-0.00205509	0.00164388			2.22484	-0.33973	0.00591206
-0.0190625	-0.0040625	0.00183498	0.0259375	0.00114944			-0.00526529	-0.00396687	0.00161803			2.22937	-0.3443	0.00608788
-0.0184375	0.011875	0.00183374	0.026875	0.0011536			-0.00506286	-0.00509923	0.00160096			2.24837	-0.338686	0.00613263
-0.0053125	0.0096875	0.00182565	0.0271875	0.00114459			-0.00459206	-0.0040551	0.0015924			2.2736	-0.338229	0.0063236
0.0159375	-0.0128125	0.00181641	0.026875	0.0011463			-0.0043926	-0.000760957	0.00152127			2.28201	-0.343516	0.0063745
-0.0115625	0.015	0.00184822	0.0265625	0.00114363			-0.00532689	0.00222436	0.00152462			2.29043	-0.347629	0.00649945
0.02375	0.0003125	0.00188839	0.026875	0.00115317			-0.00472506	0.00263613	0.00149569			2.30307	-0.347433	0.00644754
0.0175	0.0003125	0.00190181	0.0271875	0.00115635			-0.00468556	0.00226848	0.00145152			2.32675	-0.350697	0.00643803
0.015	-0.1025	0.00188131	0.026875	0.00115698			-0.00536919	0.00394496	0.00136671			2.34186	-0.351219	0.00645664
0.0109375	0.0290625	0.00187044	0.0275	0.00115355			-0.0052555	0.00616557	0.0013315			2.35476	-0.349848	0.00656864
0.0378125	-0.079375	0.00185064	0.028125	0.00117703			-0.00566578	0.00876853	0.00127769			2.37248	-0.353635	0.00669974
-0.0046875	-0.0003125	0.00182765	0.0265625	0.0011671			-0.00504588	0.00931265	0.00133752			2.37786	-0.359314	0.00675634
0.0025	-0.0015625	0.00182026	0.0271875	0.0011551			-0.00515477	0.00735676	0.00130017			2.37805	-0.359314	0.00695279
0.0246875	0.016875	0.00180421	0.0275	0.00116544			-0.00471977	0.00450379	0.00128489			2.38051	-0.356507	0.00704411
-0.034375	0.0165625	0.00178211	0.028125	0.00118533			-0.00551609	0.00338613	0.00127658			2.38512	-0.357682	0.00713455
0.01875	-0.00125	0.00184153	0.026875	0.00118936			-0.00474645	0.0042832	0.00126282			2.3774	-0.35964	0.00721194
0.01	0.0371875	0.00203772	0.0265625	0.00118459			-0.00520691	0.00381261	0.00132413			2.38477	-0.359379	0.0072448
0.031875	0.0271875	0.00214585	0.02625	0.00120175			-0.00499828	0.00137141	0.00127689			2.38475	-0.361207	0.00741884
-0.019375	-0.04875	0.00222169	0.025625	0.00120619			-0.0052863	-0.000760957	0.00122463			2.386	-0.364602	0.00750178
-0.0328125	-0.0071875	0.00227378	0.02625	0.00122402			-0.00540606	-0.00105508	0.00121227			2.39183	-0.361925	0.00748021
-0.0065625	0.0096875	0.0022821	0.026875	0.00121538			-0.00457622	0.00126847	0.00122292			2.3881	-0.359118	0.00755849
-0.0409375	0.0040625	0.00227062	0.025625	0.00124122			-0.00375207	0.00419496	0.00114363			2.39037	-0.364145	0.00761531
0.0125	0.0125	0.00225773	0.0253125	0.0012383			-0.00367157	0.00715087	0.00118504			2.4137	-0.369824	0.00773289
0.0065625	-0.0234375	0.00223093	0.0253125	0.00122948			-0.00356282	0.00678322	0.00118253			2.42879	-0.367996	0.00790943
-0.0025	-0.0215625	0.00220728	0.02625	0.00121671			-0.00364395	0.00656263	0.00115708			2.42413	-0.367213	0.00793077
-0.02125	0.0315625	0.00218143	0.0265625	0.00122284			-0.00279907	0.00897442	0.00115509			2.4258	-0.369106	0.00806673
-0.01875	-0.0078125	0.0021637	0.0265625	0.0012264			-0.00214937	0.0113568	0.00112508			2.41696	-0.369367	0.00799665
0.0225	0.025625	0.00215495	0.0275	0.00123367			-0.00236043	0.0138127	0.00114995			2.4118	-0.369433	0.00797231
0.0315625	0.00625	0.00212818	0.0265625	0.00124991			-0.00243881	0.0128568	0.00107993			2.4194	-0.375961	0.00784038
-0.006875	-0.0053125	0.00213237	0.025625	0.00124125			-0.00282712	0.00973913	0.00101171			2.42273	-0.375569	0.00797565
0.0184375	0.0359375	0.00212275	0.0265625	0.00124427			-0.00246181	0.00723911	0.000998908			2.42525	-0.369889	0.00809083
-0.0125	-0.0203125	0.0020992	0.0265625	0.00124132			-0.00233038	0.00731264	0.00103709			2.42427	-0.369367	0.00814078
-0.0225	0.02	0.00208187	0.02625	0.0012484			-0.0019774	0.0082097	0.00107199			2.42501	-0.37348	0.00813616
0.006875	0.0009375	0.00206226	0.025	0.00123976			-0.00181582	0.00760676	0.00104366			2.42414	-0.375177	0.0081578
-0.0115625	-0.008125	0.00206883	0.025	0.00123592			-0.00115448	0.00465085	0.00099698			2.42363	-0.372958	0.00825645
-0.02875	-0.0065625	0.00205688	0.0246875	0.00124932			-0.0012563	0.00216554	0.00102105			2.41879	-0.374067	0.00812774
0.021875	-0.030625	0.00205227	0.0246875	0.00125568			-0.000627309	0.00251848	0.000988204			2.40711	-0.372174	0.00795239
-0.026875	0.0146875	0.00203209	0.0253125	0.00126695			-0.00173382	0.00622439	0.000966227			2.40925	-0.369955	0.007926
0.005	-0.01	0.00203028	0.025625	0.00125622			-0.00151907	0.00890089	0.000984366			2.40318	-0.373676	0.00780529
-0.0159375	0.013125	0.00202381	0.024375	0.00125655			-0.000474329	0.0104009	0.000953498			2.39821	-0.377919	0.00775401
0.014375	0.025	0.00201461	0.025	0.00125531			-0.000299859	0.0104156	0.000994521			2.39683	-0.375308	0.00768444
0.019375	0.01375	0.00200208	0.0253125	0.0012591			-0.000299942	0.0104597	0.000985084			2.40269	-0.37224	0.00766112
-0.0109375	0.0096875	0.00199502	0.02625	0.00125439			4.08945e-05	0.0128421	0.000945737			2.39356	-0.374263	0.00762046
-0.0009375	0.0121875	0.00198399	0.02625	0.00123975			0.000871562	0.0143862	0.000895077			2.37464	-0.37459	0.00752169
0.005625	0.0234375	0.00200059	0.025625	0.00122997			0.0011155	0.0169745	0.000814025			2.3577	-0.374133	0.00770864
0.0034375	-0.015625	0.00201824	0.0259375	0.00121813			0.000549133	0.0142686	0.000829439			2.35364	-0.376352	0.0076692
0.0025	0.01125	0.00204442	0.025	0.0012055			0.00068549	0.0109597	0.000883279			2.34314	-0.377005	0.00780581
0.0065625	0.0290625	0.00203528	0.025	0.00119709			0.000586206	0.00982736	0.000943985			2.32636	-0.370869	0.00771122
0.0140625	-0.0121875	0.00202531	0.0265625	0.00119628			0.00113613	0.0104597	0.000964796			2.30705	-0.367866	0.00765204
0.0034375	0.01125	0.00206015	0.025625	0.00118486			0.00166845	0.0101362	0.00105055			2.29087	-0.371848	0.00770252
-0.004375	0.000625	0.00203768	0.024375	0.00117451			0.00109214	0.0074597	0.00112495			2.27211	-0.372174	0.00773499
-0.01375	0.0315625	0.00201299	0.0246875	0.00117367			0.00024132	0.00594498	0.00109385			2.24945	-0.367801	0.00787442
0.016875	0.0475	0.00200736	0.025	0.00117597			0.0012488	0.00390085	0.00112536			2.2249	-0.36656	0.00919104
0.0096875	0.010625	0.00202711	0.0246875	0.00117105			0.00136108	0.00459203	0.0011448			2.20423	-0.365646	0.00930123
-0.0375	0.0140625	0.00202006	0.0253125	0.001194			0.00167975	0.00832735	0.00111147			2.18485	-0.364732	0.00993494
-0.00625	0.001875	0.00202996	0.025625	0.00118542			0.00194443	0.0110627	0.00112804			2.16822	-0.364928	0.0119622
0.0228125	-0.01125	0.00204912	0.025	0.0011935			0.00255983	0.0104597	0.00115515			2.15063	-0.367539	0.0136492
-0.0153125	0.0075	0.00205836	0.024375	0.00119399			0.00238954	0.00972442	0.00111608			2.13649	-0.366169	0.0191455
-0.0346875	0.01	0.00207372	0.025625	0.00121385			0.00176272	0.0114744	0.00113879			2.1159	-0.358465	0.0218076
0.015625	-0.0165625	0.00206859	0.028125	0.00121439			0.00107441	0.013945	0.00111482			2.09321	-0.357813	0.0293079
0.0196875	-0.0134375	0.00205633	0.0265625	0.001219			0.00189763	0.0160774	0.00112002			2.07501	-0.360489	0.0354779
0.0128125	0.01875	0.00204016	0.02625	0.00121667			0.0017425	0.0163568	0.00107344			2.05275	-0.359836	0.0441776
-0.0009375	0.0046875	0.00202419	0.026875	0.00120249			0.00187403	0.013445	0.00111321			2.03637	-0.35605	0.0512678
0.0034375	-0.015	0.00201905	0.0271875	0.00119099			0.00119051	0.00925383	0.00115651			2.01899	-0.355136	0.0599254
0.0390625	0.110625	0.00199428	0.025625	0.00121526			0.000986445	0.00923912	0.00119764			1.99598	-0.350762	0.0697057
0.001875	-0.044375	0.00199232	0.0271875	0.00120204			0.000838781	0.00837147	0.00118638			1.97211	-0.344365	0.0811371
-0.0165625	0.0009375	0.00198788	0.028125	0.00120367			0.0012586	0.00803323	0.00125787			1.94907	-0.345736	0.099002
0.0084375	-0.02125	0.001976	0.025625	0.00119715			0.000969802	0.00601851	0.00131801			1.92648	-0.347041	0.117194
0.0134375	0.0503125	0.00195364	0.025	0.00119572			0.00194823	0.00320966	0.00151435			1.90526	-0.34097	0.139172
0.005625	-0.0175	0.0019525	0.0271875	0.00118649			0.00170474	0.00213613	0.00162026			1.8864	-0.334181	0.161353
0.0009375	0.033125	0.00198387	0.026875	0.00117269			0.00204068	0.00351849	0.00177621			1.86542	-0.334051	0.181703
-0.00125	0.005	0.00201735	0.02625	0.00115937			0.00131584	0.00738617	0.00197036			1.84766	-0.331766	0.207963
-0.0246875	0.0646875	0.00207729	0.0275	0.00116966			0.00133493	0.00945971	0.00229745			1.8265	-0.327523	0.232504
0.011875	-0.048125	0.00208398	0.0275	0.001167			0.00115139	0.00897442	0.00271098			1.80485	-0.327523	0.254617
-0.0121875	0.110625	0.00208903	0.026875	0.00116469			0.00137569	0.00885677	0.00314344			1.78741	-0.323932	0.280068
-0.0028125	-0.073125	0.00210871	0.028125	0.00115304			0.00127784	0.0111509	0.00442002			1.76874	-0.315185	0.308613
-0.0025	0.030625	0.00209564	0.0303125	0.00114121			0.00117658	0.0133421	0.0058268			1.74933	-0.311986	0.33632
-0.009375	0.035	0.00208836	0.02875	0.00113641			0.00202777	0.0146215	0.00803592			1.7281	-0.310876	0.364476
0.021875	0.0228125	0.00207335	0.0275	0.00114417			0.000938308	0.0141509	0.0106861			1.70677	-0.307808	0.396877
0.0259375	0.039375	0.0020526	0.02875	0.00115589			0.000542674	0.0112833	0.0140124			1.68523	-0.297951	0.426188
0.0059375	0.0003125	0.0020396	0.0290625	0.00114747			0.000968473	0.00822441	0.0189884			1.66319	-0.292598	0.461947
-0.015	0.0075	0.0020227	0.028125	0.00114822			0.000979573	0.00776852	0.0261848			1.64105	-0.285286	0.495141
0.0175	-0.0115625	0.00200539	0.028125	0.00115146			0.00133068	0.00782735	0.0347299			1.62101	-0.276473	0.532593
0.006875	0.014375	0.00199235	0.02875	0.00114403			0.00132111	0.0064891	0.0436454			1.60296	-0.271904	0.558335
-0.00125	0.0103125	0.00197073	0.026875	0.00113107			0.0013209	0.00398908	0.0545238			1.58592	-0.266094	0.587821
-0.018125	-0.000625	0.00197437	0.0271875	0.00113514			0.00115293	0.00188612	0.0655825			1.56626	-0.256824	0.615171
0.0225	-0.035	0.00196516	0.0278125	0.00114354			0.00146802	0.00193024	0.0778695			1.54671	-0.242201	0.643051
0.0165625	-0.0175	0.00195449	0.02875	0.0011459			0.000653323	0.00443026	0.0922681			1.5286	-0.234498	0.675417
0.0359375	-0.01125	0.00194928	0.0275	0.0011676			0.000574446	0.00834206	0.106135			1.50878	-0.230581	0.704396
0.0115625	0.0128125	0.00192506	0.0278125	0.00116466			9.02168e-05	0.00963619	0.118047			1.48754	-0.217917	0.728522
0.0284375	0.0025	0.00191178	0.028125	0.00117863			0.000823305	0.00920971	0.131325			1.46755	-0.207342	0.760039
0.02375	0.0028125	0.00189303	0.0284375	0.00118774			0.00194823	0.00984207	0.144499			1.45104	-0.194938	0.788748
0.0065625	0.0328125	0.00187482	0.02875	0.00117955			0.00242352	0.012048	0.159047			1.43293	-0.181099	0.814409
0.0059375	0.0090625	0.00188216	0.03	0.00117083			0.00256584	0.0155774	0.175337			1.41484	-0.167194	0.844258
0.029375	-0.0040625	0.00186347	0.0290625	0.00118566			0.0033105	0.0161362	0.189436			1.39875	-0.156553	0.871019
0.006875	-0.008125	0.00187532	0.0284375	0.00117781			0.00297775	0.0152392	0.204232			1.38084	-0.14291	0.902739
-0.00125	0.0090625	0.0018739	0.02875	0.00116443			0.00278766	0.0126362	0.216346			1.36314	-0.123522	0.92492
0.0225	0.0025	0.00186437	0.029375	0.00117246			0.00292314	0.0121068	0.227935			1.34632	-0.103742	0.955447
-0.010625	0.0096875	0.00186684	0.029375	0.00116852			0.00379496	0.0127833	0.243027			1.32862	-0.0876175	0.989924
-0.0075	0.0103125	0.00186458	0.02875	0.00116151			0.00348313	0.0132245	0.260252			1.31448	-0.0708404	1.02561
-0.0034375	-0.02125	0.00185142	0.0284375	0.00115052			0.00326444	0.0129303	0.277756			1.29706	-0.0524314	1.0542
-0.001875	-0.0228125	0.00184092	0.0278125	0.0011381			0.002883	0.0112833	0.294643			1.27873	-0.0340223	1.09141
[truncated: 2,004 more rows]
