# Supplementary material for: Mapping responses to focal injections of bicuculline in the lateral parafacial region identifies core regions for maximal generation of active expiration
Source: eLife. 2024 Jul 17;13:RP94276. doi: 10.7554/eLife.94276 (PMC11254382; doi:10.7554/eLife.94276)
Supplement: Figure 2—source data 1. — Number of cFos positive cells counted per hemisection at rostro-caudal locations ranging from –0.5 mm to +1.0 mm from VIIc (Figure 2C dataset). [file elife-94276-fig2-data1.xlsx]

## Sheet: Figure 2_C
Injection location from VIIc (mm)	Distance from VIIc (µm)	Number of cells	SEM	Number of cells	SEM
		cFos		cFos-phox2b
CTRL	-450	38.2	2.1	4.4	0.5
	-360	50.4	3.4	12.3	3.5
	-180	40.5	2.6	15.7	3.2
	180	40.3	7.2	8.9	0.8
	270	50.6	5	7.2	1.6
	450	45.8	4.1	8.1	0.5
	630	53.9	7.6	0.3	0.1
	810	48.4	8.3	0	0
	960	59.7	5.2	0	0
	1080	55.6	4.8	0	0
-0.2mm	-450	50.9	5.15257	0	0
	-360	66.6	7.02168	0.16667	0.15215
	-270	89.7	8.42146	0.33333	0.30429
	-180	74.2	4.27036	1.83333	0.7964
	-90	65.1	4.91213	4.83333	1.14058
	0	69.5	12.5174	9.66667	4.27742
	90	66.7	12.045	8.5	1.95434
	180	53.8889	8.64734	9	1.10554
	270	54.7	9.05875	7	1.63299
	360	50	6.13025	4.83333	1.57086
	450	42.1	3.06415	3	1.87083
	540	40.6	1.42969	1	0.91287
	630	40.8	0.67528	0.66667	0.60858
	720	38.6	0.8025	0	0
	810	40.6	1.42969	0	0
	960	42.1	1.42969	0	0
	1080	38.6	1.42969	0	0
+0.1 mm	-450	40.5	0.92444	0.28571	0.21258
	-360	44.4286	2.33587	0.92857	0.65826
	-270	51.2143	4.11714	2.21429	1.33699
	-180	67.3571	8.80897	5.07143	2.23941
	-90	72.5	4.44175	7.21429	1.71184
	0	114.929	10.8729	13.2143	2.45818
	90	123.071	8.49878	10.7857	2.0927
	180	105.214	9.39506	9.5	1.80065
	270	94.4615	8.10261	4.64286	1.94204
	360	77.6154	7.23285	2.21429	0.86413
	450	62.3077	5.4299	0.78571	0.43069
	540	49.2308	2.82037	0.07143	0.06883
	630	43.6154	1.29879	0	0
	720	40.2308	0.94933	0	0
	810	43.6154	2.82037	0	0
	960	40.2308	5.4299	0	0
	1080	40.2308	2.82037	0	0
+0.4 mm	-450	38.5	0.81548	0	0
	-360	40.2	0.80994	0	0
	-270	41.4	1.002	0	0
	-180	42.4	0.98184	0.2	0.12649
	-90	49	2.78927	1	0.4899
	0	62.8	5.34378	1.7	0.87235
	90	83.6	9.31365	6.8	2.46089
	180	98.2	9.74043	6.9	2.27794
	270	97.9	11.9745	3	1.15758
	360	110.2	10.3709	1.1	0.75432
	450	91.3	5.30292	0.5	0.38079
	540	69.8	5.84602	0.2	0.18974
	630	61.6	7.87934	0.1	0.09487
	720	42.4	0.98184	0	0
	810	49	2.78927	0	0
	960	40.2	0.80994	0	0
	1080	41.4	1.002	0	0
+0.6 mm	-450	33	1.11803	0	0
	-360	34.5	0.74068	0	0
	-270	39	0.5137	0.08333	0.07979
	-180	40.6667	0.54433	0.25	0.1718
	-90	41.25	0.59073	0.83333	0.32984
	0	44.8333	1.6949	2.5	0.39965
	90	53.8333	4.02739	4.5	0.44876
	180	66.1667	8.57956	8.41667	0.74961
	270	89.5	14.3181	5.5	0.73125
	360	90	12.4766	2.25	0.42696
	450	84.3333	7.51141	1.08333	0.46336
	540	98.25	8.67798	0.5	0.32275
	630	70.3333	5.4675	0.66667	0.41574
	720	54.6667	2.9915	0	0
	810	47.5	4.67484	0	0
	960	43.0833	3.10568	0	0
	1080	43.0833	2.9915	0	0
+0.8 mm	-450	31.9	0.88826	0	0
	-360	35	0.69282	0	0
	-270	36.6	0.751	0	0
	-180	37.8	0.57966	0	0
	-90	38.5	0.58737	0.5	0.17678
	0	39.9	0.67007	1.375	0.35078
	90	40.9	0.6237	4.375	0.49804
	180	41	0.37417	7.375	0.61078
	270	43.2	0.62929	10.125	0.92597
	360	47	2.46982	4.625	0.68323
	450	57.6	5.27864	2.125	0.51349
	540	71.3	6.20653	0.75	0.38528
	630	84.7	6.40632	0.25	0.23385
	720	95.7	6.3766	0.125	0.11693
	810	101.2	5.17842	0	0
	960	84.3	9.59276	0	0
	1080	62.8	5.79793	0	0
