# Supplementary material for: Mapping responses to focal injections of bicuculline in the lateral parafacial region identifies core regions for maximal generation of active expiration
Source: eLife. 2024 Jul 17;13:RP94276. doi: 10.7554/eLife.94276 (PMC11254382; doi:10.7554/eLife.94276)
Supplement: Figure 3—source data 1. [file elife-94276-fig3-data1.xlsx]

## Sheet: -0.2mm
B		baseline						C		0-2min							18-20min
		Mean			Error					Mean			Error				Mean			Error
timelag	Airflow	DIA	ABD	Airlfow	DIA	ABD			Airflow	DIA	ABD	Airflow	DIA	ABD		Airflow	DIA	ABD	Airflow	DIA	ABD
-2	-0.0499233	-0.0898235	0.0108212	0.0537921	0.084452	0.479933			0.0330146	-0.0864246	0.0938481	0.0424254	0.107997	0.48625		-0.0227465	-0.0926032	-0.131936	0.0382739	0.0824263	0.463828
-1.999	-0.0491946	-0.0899122	0.00300798	0.0544461	0.0845374	0.46947			0.0340876	-0.082199	0.0900566	0.0396806	0.109175	0.497302		-0.0180666	-0.0920914	-0.138503	0.0424314	0.0805292	0.474006
-1.998	-0.0500144	-0.0893485	0.00832888	0.0545951	0.0859976	0.468265			0.0377944	-0.0788148	0.092736	0.0422085	0.110455	0.494587		-0.0173404	-0.0929345	-0.147554	0.0399586	0.0792734	0.470387
-1.997	-0.0486025	-0.0887729	0.00774602	0.0543041	0.0866285	0.470847			0.0342827	-0.0755314	0.0879983	0.0393541	0.110268	0.50998		-0.0178246	-0.0934682	-0.154009	0.0396271	0.0786524	0.471216
-1.996	-0.0462569	-0.0892147	0.00861255	0.0524569	0.0865222	0.469049			0.0329171	-0.0706369	0.104609	0.041877	0.113845	0.497966		-0.0161301	-0.0932461	-0.14542	0.0394857	0.0773882	0.479707
-1.995	-0.0444807	-0.0894053	0.00711834	0.05375	0.0865776	0.467991			0.0302833	-0.0676272	0.0988627	0.0421238	0.116468	0.51662		-0.0122571	-0.0949843	-0.133457	0.0384406	0.075612	0.480672
-1.994	-0.0439569	-0.0895056	0.00674586	0.0525902	0.086953	0.468827			0.0291127	-0.066307	0.123559	0.0407874	0.116568	0.740746		-0.00927169	-0.0968006	-0.13797	0.0363279	0.0743145	0.475385
-1.993	-0.0459837	-0.0880959	0.0104805	0.0519068	0.0883375	0.475837			0.0281372	-0.0624418	0.133969	0.0391552	0.121145	0.785235		-0.0120957	-0.0957977	-0.142895	0.0376724	0.0736159	0.498002
-1.992	-0.0485797	-0.0885748	0.010026	0.0517472	0.0877935	0.472705			0.0281372	-0.0594515	0.13694	0.0409331	0.12296	0.795713		-0.0140322	-0.0960561	-0.148003	0.0385381	0.0732279	0.504735
-1.991	-0.0498094	-0.0877972	0.0183567	0.0519099	0.08876	0.477986			0.0276495	-0.055561	0.136379	0.0420028	0.122778	0.799093		-0.0159687	-0.0972305	-0.147734	0.0347905	0.0726912	0.498319
-1.99	-0.047851	-0.0869931	0.0120586	0.0509309	0.0898982	0.469958			0.0221868	-0.0529967	0.150518	0.0417543	0.123449	0.797083		-0.0190349	-0.0956198	-0.136515	0.036954	0.0735351	0.502712
-1.989	-0.0481015	-0.086699	0.0135783	0.050049	0.0896915	0.467186			0.0207236	-0.0512695	0.215232	0.0412371	0.124051	0.88036		-0.0190349	-0.0959082	-0.131075	0.0364007	0.0735731	0.500168
-1.988	-0.0487391	-0.0850266	0.0117696	0.0508726	0.0909184	0.464681			0.0231623	-0.0499143	0.222805	0.0411911	0.12353	0.962085		-0.0183087	-0.0973983	-0.130996	0.0359514	0.0730884	0.494226
-1.987	-0.0519273	-0.084559	0.0136319	0.0498266	0.091622	0.467199			0.0269667	-0.0476149	0.255758	0.0417698	0.121729	1.14672		-0.0197611	-0.0954335	-0.139632	0.0352751	0.0746807	0.494792
-1.986	-0.0531114	-0.0824637	0.0161088	0.0507108	0.0929326	0.462827			0.0228697	-0.0445779	0.336418	0.0434437	0.120642	1.52111		-0.0230692	-0.094876	-0.130366	0.0345174	0.0745876	0.489173
-1.985	-0.0499688	-0.080601	0.0207843	0.0504427	0.0945487	0.462758			0.0227721	-0.0416166	0.342953	0.041442	0.121396	1.58675		-0.0225044	-0.0961775	-0.1271	0.0354142	0.0745665	0.481207
-1.984	-0.0476233	-0.079386	0.0137609	0.051123	0.0950736	0.461971			0.0232598	-0.037963	0.408526	0.0426609	0.121398	1.68712		-0.0200031	-0.0961263	-0.121166	0.0328223	0.0759437	0.486806
-1.983	-0.0451866	-0.077934	0.0129095	0.050132	0.0959287	0.465816			0.0228696	-0.0357514	0.438926	0.0419583	0.122606	1.77454		-0.0150812	-0.0978482	-0.11834	0.0341007	0.0753105	0.492741
-1.982	-0.0462569	-0.0757402	0.0119996	0.0510457	0.0973547	0.46654			0.0205285	-0.0322123	0.452359	0.0404254	0.124235	1.78749		-0.0108047	-0.0997188	-0.102254	0.036757	0.074956	0.491651
-1.981	-0.0478055	-0.0738802	0.0151001	0.0520452	0.0984987	0.459863			0.0243329	-0.0270733	0.475987	0.0432532	0.125753	1.76722		-0.00935238	-0.101629	-0.0976474	0.0364426	0.0740586	0.492172
-1.98	-0.0466896	-0.0729407	0.0149618	0.0532859	0.0985254	0.460055			0.0212113	-0.0216359	0.509511	0.0402162	0.125853	1.78507		-0.00894894	-0.102635	-0.108855	0.0363222	0.0745972	0.507877
-1.979	-0.0440252	-0.0710169	0.0173418	0.0522441	0.0986281	0.470302			0.0171143	-0.0184225	0.596248	0.0421985	0.127965	1.95772		-0.00564075	-0.104002	-0.0898743	0.0384216	0.0740931	0.528272
-1.978	-0.0430688	-0.0685745	0.0232718	0.051518	0.100318	0.465019			0.015456	-0.0145507	0.624439	0.0421897	0.130803	2.03755		-0.00305875	-0.104446	-0.097636	0.037087	0.0753855	0.522095
-1.977	-0.0441391	-0.0666562	0.0163438	0.0521195	0.100908	0.469617			0.0157487	-0.0122142	0.647652	0.0441847	0.133606	2.11486		-0.000718814	-0.10562	-0.100985	0.0360122	0.0745634	0.516825
-1.976	-0.0472817	-0.0649463	0.0150179	0.051829	0.100465	0.468704			0.0135051	-0.0106676	0.684335	0.0410878	0.132234	2.22554		-0.00200982	-0.10653	-0.0925261	0.0361232	0.075256	0.502813
-1.975	-0.0493084	-0.0625926	0.0174431	0.0516953	0.10023	0.472235			0.0104811	-0.00972159	0.679091	0.0428657	0.131218	2.27434		-0.00297806	-0.107708	-0.0833982	0.0385721	0.0750225	0.508099
-1.974	-0.0499461	-0.0606393	0.0220044	0.0532721	0.0995777	0.470417			0.00813996	-0.0089178	0.699139	0.0435092	0.131879	2.26364		-0.0072545	-0.108972	-0.0935612	0.036425	0.074076	0.513218
-1.973	-0.049855	-0.0584319	0.0192348	0.0523061	0.0986998	0.462968			0.00521353	-0.00776894	0.770674	0.0448256	0.132017	2.33858		-0.00733519	-0.110148	-0.0950679	0.0388663	0.0735455	0.503537
-1.972	-0.0504015	-0.0569043	0.0218088	0.0489296	0.0979214	0.459282			0.0045307	-0.00525314	0.775851	0.0437574	0.13101	2.32171		-0.00572144	-0.11029	-0.0960468	0.0377256	0.0730968	0.490429
-1.971	-0.05195	-0.0552893	0.0210872	0.0482591	0.0975454	0.475836			0.00462824	-0.00145076	0.862308	0.0428918	0.130115	2.41572		-0.00798069	-0.1098	-0.105361	0.0377448	0.0728161	0.470931
-1.97	-0.0547966	-0.053311	0.0273212	0.0485988	0.0975955	0.471465			0.0063841	0.000938552	0.888375	0.0445574	0.129583	2.45858		-0.00701244	-0.11072	-0.117633	0.0351654	0.0724859	0.475516
-1.969	-0.0556392	-0.0504441	0.025991	0.0493347	0.097415	0.475832			0.00472579	0.00497468	0.932626	0.0431932	0.130971	2.48742		-0.0112889	-0.111624	-0.117965	0.0350817	0.0725671	0.465832
-1.968	-0.0536124	-0.0492303	0.0287166	0.0493666	0.0975074	0.472088			0.00199446	0.00901229	1.06966	0.0441726	0.133963	2.62474		-0.00757725	-0.112533	-0.120777	0.0368247	0.0723216	0.464759
-1.967	-0.0513352	-0.0483067	0.0284723	0.0495958	0.0979379	0.470626			0.00355522	0.0127461	1.14124	0.0439136	0.132864	2.68018		-0.00443044	-0.112927	-0.124877	0.0375353	0.0716874	0.470242
-1.966	-0.0502421	-0.0474617	0.0276565	0.0502703	0.098045	0.474545			0.00287238	0.0173919	1.25791	0.0429317	0.13269	2.70494		0.000572181	-0.113628	-0.1206	0.0364447	0.0711342	0.478201
-1.965	-0.0516084	-0.0463943	0.0244088	0.0494793	0.0977081	0.469134			0.00238464	0.0216529	1.3326	0.0434294	0.129862	2.76927		0.00275075	-0.114056	-0.115928	0.0368189	0.071475	0.459908
-1.964	-0.0517906	-0.0457294	0.0336755	0.0503222	0.0972515	0.478035			0.000238593	0.0248566	1.38703	0.0415044	0.129018	2.94196		0.00444519	-0.113622	-0.121757	0.0384144	0.0740065	0.473087
-1.963	-0.0502649	-0.0434421	0.0410056	0.0524129	0.0976838	0.478421			0.00306748	0.0272959	1.42435	0.0448575	0.128679	2.98585		0.00533276	-0.113964	-0.122303	0.0371874	0.0746384	0.460413
-1.962	-0.048648	-0.0427642	0.0424415	0.0531634	0.0975483	0.479352			-0.00415104	0.0312437	1.43691	0.0427233	0.125115	3.05057		0.00605894	-0.115267	-0.130843	0.0413353	0.0752858	0.476479
-1.961	-0.0475322	-0.0423258	0.0409408	0.0510357	0.0980855	0.487224			-0.0059069	0.0347449	1.51193	0.0429569	0.122533	3.16242		0.0104968	-0.116065	-0.146463	0.0413632	0.0754381	0.48167
-1.96	-0.0485569	-0.0416028	0.0438656	0.0493727	0.0982672	0.487439			-0.00561426	0.0394017	1.55331	0.0438504	0.119642	3.27939		0.0122719	-0.115782	-0.150834	0.0378643	0.0758811	0.479625
-1.959	-0.0530431	-0.0409701	0.0538329	0.0511088	0.0975744	0.490005			-0.00854068	0.0440152	1.62782	0.0449539	0.11754	3.40277		0.0113843	-0.11685	-0.158816	0.0397162	0.075831	0.471853
-1.958	-0.0548877	-0.0403935	0.0472781	0.0515093	0.0976389	0.482862			-0.0139058	0.048998	1.78142	0.0458481	0.114278	3.59126		0.00597825	-0.115454	-0.146992	0.040935	0.0764363	0.486096
-1.957	-0.0538629	-0.0395714	0.0456885	0.0507133	0.0988418	0.482475			-0.0146862	0.0518248	1.95325	0.0449704	0.112138	3.83727		0.00541344	-0.115582	-0.138164	0.0439757	0.0778655	0.496465
-1.956	-0.0538857	-0.0387777	0.046756	0.0497859	0.0983754	0.48069			-0.0178077	0.0566544	2.05917	0.0447991	0.112046	3.98441		0.00492931	-0.116702	-0.149052	0.0431073	0.077313	0.503578
-1.955	-0.0551609	-0.0395014	0.0500682	0.0466425	0.097748	0.478205			-0.0169298	0.0593509	2.06635	0.0454411	0.10944	3.97989		0.00573619	-0.117398	-0.154592	0.0429267	0.0777002	0.499653
-1.954	-0.0571421	-0.0404305	0.0506159	0.0456141	0.0968865	0.474383			-0.020539	0.064817	2.19725	0.0462431	0.108418	4.01584		0.00420312	-0.118605	-0.153631	0.0426021	0.0767847	0.498617
-1.953	-0.0589867	-0.0409654	0.0497146	0.0442978	0.0956054	0.47147			-0.0165396	0.0681321	2.279	0.0465706	0.107074	4.07663		0.00339624	-0.119894	-0.158117	0.0411512	0.0751037	0.494976
-1.952	-0.0593966	-0.041345	0.0518467	0.0466056	0.094072	0.473194			-0.0178077	0.0726432	2.29295	0.0461652	0.104099	4.04321		0.000814243	-0.120481	-0.161041	0.0407204	0.0743311	0.4998
-1.951	-0.0557303	-0.0418933	0.0441099	0.0454518	0.0931123	0.473795			-0.0219047	0.0769044	2.33285	0.0463954	0.102923	4.02212		8.806e-05	-0.120368	-0.161322	0.0424509	0.0755541	0.510748
-1.95	-0.0532481	-0.0413653	0.0391812	0.0454802	0.0920985	0.464872			-0.0226851	0.0805575	2.39123	0.0468345	0.103434	3.98401		0.00726925	-0.122145	-0.158486	0.0436855	0.0748692	0.499877
-1.949	-0.05195	-0.0409975	0.0412086	0.0457685	0.0916977	0.463971			-0.0181979	0.0850574	2.42868	0.0465969	0.103391	4.02616		0.0128367	-0.122695	-0.164601	0.0419182	0.0756335	0.497974
-1.948	-0.0540679	-0.0411357	0.041602	0.0462586	0.0911234	0.461166			-0.0226851	0.0892966	2.51582	0.0467653	0.104275	4.07454		0.0112229	-0.123686	-0.169154	0.0374172	0.0766022	0.492666
-1.947	-0.0532253	-0.0412355	0.0375606	0.0470298	0.0916429	0.477611			-0.0231728	0.0926409	2.63749	0.0461896	0.102096	4.20131		0.0117071	-0.1238	-0.164347	0.0395947	0.0774837	0.493429
-1.946	-0.0502421	-0.0411282	0.0432624	0.0486026	0.0905747	0.476445			-0.0249287	0.0972225	2.81128	0.048018	0.100513	4.25935		0.0154187	-0.124842	-0.179103	0.0406266	0.0773506	0.491936
-1.945	-0.0494906	-0.0415263	0.0482901	0.0487342	0.0896748	0.479636			-0.0252213	0.102196	2.90174	0.0469579	0.103176	4.24276		0.0165483	-0.12595	-0.182927	0.0425951	0.0774725	0.479945
-1.944	-0.0470995	-0.04153	0.0457916	0.0480979	0.0893192	0.477968			-0.0327325	0.105057	3.00164	0.0462224	0.10128	4.26691		0.0199372	-0.126154	-0.180046	0.0398719	0.0780715	0.466838
-1.943	-0.0496272	-0.0408946	0.0430197	0.0462883	0.0895107	0.474764			-0.0309766	0.112214	3.0963	0.0497743	0.101925	4.31341		0.0184848	-0.127341	-0.182555	0.0395252	0.0778478	0.468355
-1.942	-0.0526787	-0.0402819	0.0454993	0.0478443	0.0897137	0.474516			-0.0324398	0.115151	3.19319	0.0481595	0.103722	4.34359		0.0182428	-0.129359	-0.177846	0.0394867	0.0777973	0.45261
-1.941	-0.0544094	-0.0401425	0.0476033	0.0469766	0.0889493	0.475833			-0.0370246	0.117936	3.35363	0.0498174	0.103299	4.3695		0.0129981	-0.131505	-0.199682	0.0421921	0.0769395	0.444646
-1.94	-0.053658	-0.0393747	0.0394481	0.0466861	0.0894173	0.470434			-0.0401461	0.125129	3.46445	0.0503311	0.106574	4.41129		0.0106581	-0.132966	-0.201865	0.0437872	0.0759529	0.43605
-1.939	-0.0518589	-0.0390469	0.0435348	0.0450177	0.0896865	0.471212			-0.0392682	0.126862	3.49755	0.0497689	0.105977	4.43312		0.0113036	-0.134987	-0.203248	0.0441472	0.0750937	0.436384
-1.938	-0.0540223	-0.0394372	0.0350912	0.0441035	0.0895298	0.476889			-0.0424872	0.129569	3.57356	0.0516515	0.105491	4.53415		0.00920575	-0.136443	-0.194699	0.0422439	0.0739358	0.430339
-1.937	-0.0555708	-0.0400039	0.0354456	0.0442089	0.0895729	0.478866			-0.0434627	0.137762	3.6304	0.0537471	0.101461	4.53097		0.00993194	-0.138569	-0.20179	0.0397386	0.0730901	0.422666
-1.936	-0.0556847	-0.0406603	0.0430181	0.0437527	0.0898036	0.470397			-0.044048	0.139413	3.7623	0.0539787	0.101938	4.5195		0.00654306	-0.139897	-0.202135	0.0392247	0.0726152	0.421303
-1.935	-0.0548421	-0.0409325	0.0476409	0.0433652	0.0892953	0.46823			-0.0431701	0.143906	3.89359	0.0521479	0.105341	4.53825		0.00428381	-0.140368	-0.195249	0.0386888	0.072018	0.417309
-1.934	-0.04965	-0.0406234	0.0486037	0.0452065	0.0886388	0.472256			-0.0467793	0.148365	4.14949	0.0552602	0.110058	4.7172		0.00702719	-0.140673	-0.200175	0.0422186	0.0734546	0.401822
-1.933	-0.0477144	-0.0404554	0.0502382	0.0437894	0.088802	0.470848			-0.0467793	0.150498	4.25087	0.056842	0.111066	4.74849		0.0106581	-0.142406	-0.198769	0.0403475	0.0725036	0.38912
-1.932	-0.0464846	-0.0404542	0.049784	0.0424531	0.0880403	0.475539			-0.0472671	0.153012	4.35306	0.0568787	0.112956	4.79858		0.0163869	-0.143147	-0.205891	0.0383541	0.0724535	0.394014
-1.931	-0.047851	-0.0400523	0.0467442	0.0447394	0.0879296	0.472804			-0.0446333	0.154391	4.47359	0.0557683	0.114561	4.89875		0.0169517	-0.143726	-0.214838	0.0366669	0.0715666	0.383332
-1.93	-0.0459609	-0.0396349	0.0354279	0.045273	0.0879891	0.47456			-0.0516567	0.15564	4.67638	0.0586846	0.116741	5.07308		0.0149346	-0.144915	-0.219297	0.0360349	0.070177	0.38259
-1.929	-0.0418618	-0.0406074	0.0341752	0.0439922	0.0878666	0.47469			-0.0524371	0.158277	4.78384	0.0600172	0.116847	5.1352		0.0181621	-0.14374	-0.212299	0.0392293	0.0718346	0.386751
-1.928	-0.039744	-0.0410701	0.0321566	0.0438061	0.0873996	0.479749			-0.0528273	0.161359	4.94534	0.0599066	0.117705	5.14891		0.0190496	-0.143049	-0.221472	0.0365964	0.0729024	0.395081
-1.927	-0.0393569	-0.0414987	0.0433495	0.0441586	0.0864991	0.483773			-0.0555586	0.161509	5.0311	0.0597176	0.117162	5.0638		0.0233261	-0.142917	-0.223751	0.0369229	0.0736099	0.386979
-1.926	-0.0421807	-0.0418662	0.0479681	0.0437311	0.0862863	0.47936			-0.0583875	0.161604	5.04641	0.061744	0.116493	5.01985		0.0198565	-0.1417	-0.225371	0.0333896	0.0757847	0.394759
-1.925	-0.0434787	-0.041621	0.0466745	0.0428553	0.0863057	0.475791			-0.0600458	0.162551	5.18757	0.0611441	0.115489	4.97839		0.0175972	-0.142663	-0.22239	0.0324314	0.0755811	0.401127
-1.924	-0.0438658	-0.0408321	0.0453912	0.04431	0.0871669	0.479251			-0.0621918	0.163407	5.31558	0.0609802	0.115236	5.09813		0.0141277	-0.143757	-0.232048	0.0380477	0.0756772	0.408917
-1.923	-0.0412925	-0.0407693	0.049364	0.0446862	0.0873299	0.467596			-0.0670692	0.164082	5.39905	0.0640299	0.11593	5.13371		0.0106581	-0.144462	-0.239998	0.0365275	0.0757665	0.400008
-1.922	-0.0407915	-0.0399216	0.0441287	0.0440903	0.0880995	0.457815			-0.0687275	0.1661	5.59955	0.0663575	0.11719	5.20437		0.0125946	-0.143496	-0.229995	0.0363157	0.0769738	0.396656
-1.921	-0.0414519	-0.0394274	0.0462325	0.044261	0.0894448	0.455791			-0.0683374	0.166883	5.71789	0.0599309	0.119446	5.22447		0.0100933	-0.141892	-0.222172	0.0346797	0.0780379	0.399179
-1.92	-0.0436153	-0.0406477	0.0537457	0.0451282	0.0892945	0.458864			-0.0681423	0.169042	5.89447	0.0655962	0.120923	5.23269		0.00807613	-0.140842	-0.219944	0.0358567	0.079449	0.404092
-1.919	-0.041748	-0.0417726	0.0527136	0.0449087	0.089182	0.453053			-0.0705809	0.170105	5.98289	0.0695952	0.120165	5.22197		0.00412243	-0.139272	-0.218537	0.0331399	0.0829349	0.404543
-1.918	-0.0397668	-0.0429611	0.0589454	0.0435468	0.088759	0.459			-0.070776	0.171457	6.19573	0.0647473	0.117918	5.1205		0.00597824	-0.139279	-0.213524	0.0325665	0.0834963	0.391101
-1.917	-0.0357816	-0.043909	0.0576936	0.0457659	0.0881909	0.454047			-0.0715564	0.17585	6.33073	0.065629	0.11819	5.10594		0.0069465	-0.138332	-0.20277	0.0358484	0.0836985	0.399342
-1.916	-0.0333905	-0.0445694	0.0499875	0.0458067	0.0877238	0.452148			-0.0729221	0.175129	6.29721	0.0686144	0.116141	5.04503		0.011465	-0.136344	-0.20856	0.0348776	0.0848061	0.393816
-1.915	-0.0318647	-0.0453497	0.0492492	0.0450983	0.0873931	0.463317			-0.0724344	0.177477	6.42889	0.0707634	0.115943	4.90549		0.0138049	-0.135727	-0.191679	0.0340721	0.0836829	0.39993
-1.914	-0.0317281	-0.0458949	0.0505769	0.0451637	0.0880764	0.462272			-0.0729221	0.180356	6.56678	0.0655364	0.11545	4.87177		0.0165483	-0.135379	-0.19437	0.0334697	0.0841935	0.387831
-1.913	-0.029542	-0.0464165	0.041023	0.0454405	0.0879973	0.461494			-0.0771166	0.184257	6.72814	0.0712767	0.114694	4.9462		0.015338	-0.133959	-0.190654	0.0296672	0.0832212	0.392543
-1.912	-0.025739	-0.0474212	0.0413038	0.044478	0.0881774	0.464142			-0.0799455	0.1872	6.89335	0.0741821	0.117311	4.99516		0.0147732	-0.132675	-0.189509	0.0298073	0.0831092	0.395975
-1.911	-0.0230974	-0.0488195	0.0377947	0.0427647	0.0882548	0.457855			-0.0807259	0.190522	6.96296	0.0720181	0.116296	5.05552		0.0197758	-0.129029	-0.188765	0.0281542	0.0845046	0.401503
-1.91	-0.0246687	-0.0504327	0.0350186	0.0457949	0.0881597	0.461903			-0.0834572	0.192863	7.03564	0.07029	0.116911	5.06954		0.0185655	-0.124923	-0.185099	0.0299835	0.0858566	0.397359
-1.909	-0.0267182	-0.0516847	0.0304844	0.044035	0.0887036	0.458871			-0.0857984	0.197271	7.13082	0.073697	0.117424	5.08132		0.0169518	-0.120609	-0.167411	0.0300926	0.0870075	0.397353
-1.908	-0.0276518	-0.0528928	0.0285403	0.0439919	0.0889306	0.455756			-0.0875542	0.20178	7.2692	0.0739652	0.119616	5.1349		0.0125139	-0.118813	-0.165089	0.0286223	0.0887274	0.400873
-1.907	-0.0267409	-0.0548544	0.0298438	0.0446853	0.0884	0.45127			-0.0903831	0.205497	7.42695	0.0735368	0.116223	5.1784		0.0105774	-0.117027	-0.164139	0.0307127	0.0897547	0.399544
-1.906	-0.0256023	-0.0562398	0.036331	0.0451583	0.0881508	0.448902			-0.0922365	0.210229	7.49813	0.075629	0.118223	5.19439		0.00694649	-0.114656	-0.149745	0.0272511	0.0894285	0.409775
-1.905	-0.0245776	-0.0583743	0.0412782	0.0462948	0.0874386	0.447797			-0.0974065	0.213147	7.57108	0.0766808	0.11788	5.19732		0.00896368	-0.113634	-0.140537	0.0295012	0.0899724	0.405438
-1.904	-0.0263538	-0.0596705	0.0329544	0.0475419	0.0864764	0.442043			-0.0929193	0.215074	7.6616	0.0753849	0.116588	5.17462		0.00654306	-0.109718	-0.137409	0.0327564	0.0918519	0.41125
-1.903	-0.0273786	-0.0613325	0.037254	0.0479293	0.0863129	0.440896			-0.0937973	0.219269	7.81544	0.0743701	0.115527	5.27072		0.00412243	-0.106468	-0.157813	0.0316735	0.0928098	0.413606
-1.902	-0.0257845	-0.0628421	0.0410176	0.0476478	0.0858146	0.443899			-0.0961384	0.220688	8.03165	0.0787081	0.116556	5.34115		0.000894929	-0.103452	-0.15958	0.02949	0.0934382	0.425127
-1.901	-0.021936	-0.0648664	0.0415513	0.0465008	0.0852052	0.442697			-0.0990648	0.221696	8.19192	0.0768793	0.115762	5.32254		0.002428	-0.102291	-0.168553	0.0313951	0.0941982	0.433611
-1.9	-0.0179963	-0.0665652	0.0363498	0.0484637	0.0843053	0.438851			-0.0976016	0.223954	8.28879	0.0759228	0.111883	5.32406		0.00549413	-0.10003	-0.161982	0.0317648	0.0940705	0.432735
-1.899	-0.0172448	-0.0681147	0.0336435	0.049582	0.0835929	0.437157			-0.098382	0.224869	8.51743	0.0779665	0.112153	5.35674		0.00743062	-0.100546	-0.147879	0.0322737	0.093667	0.436145
-1.898	-0.0167666	-0.0695939	0.036952	0.0484195	0.0832585	0.435446			-0.101601	0.225024	8.60361	0.0804829	0.110862	5.3473		0.011465	-0.100034	-0.148365	0.0351521	0.0920485	0.431579
-1.897	-0.0154686	-0.070921	0.0416559	0.0465702	0.0822103	0.435387			-0.101601	0.227392	8.73044	0.0769642	0.110604	5.35655		0.0121912	-0.0984456	-0.154891	0.0333205	0.0911086	0.433723
-1.896	-0.0140112	-0.0725291	0.0401649	0.0444569	0.0820608	0.440315			-0.101796	0.227709	8.81178	0.0781273	0.109391	5.428		0.0110616	-0.0968071	-0.148856	0.0294639	0.0905045	0.430989
-1.895	-0.0100943	-0.0738929	0.0323319	0.0434957	0.0814757	0.440758			-0.108527	0.228525	9.04956	0.0827481	0.10733	5.45868		0.010174	-0.0964237	-0.140393	0.028906	0.0897089	0.436009
-1.894	-0.00934282	-0.0751477	0.0307728	0.0441371	0.0808102	0.439282			-0.108917	0.230071	9.09811	0.0804513	0.105721	5.48847		0.0137243	-0.0944725	-0.13745	0.0307847	0.0905572	0.433008
-1.893	-0.0104359	-0.0757032	0.0384436	0.04567	0.0806217	0.441455			-0.107844	0.232431	9.15505	0.076862	0.108713	5.4617		0.0136436	-0.0951316	-0.142788	0.031998	0.0893263	0.445795
-1.892	-0.013328	-0.076438	0.0364811	0.0440131	0.0802824	0.445736			-0.110673	0.234007	9.10826	0.0806355	0.109164	5.42107		0.00912505	-0.0938048	-0.144498	0.030581	0.0892487	0.454436
-1.891	-0.0138745	-0.0764639	0.0366977	0.0441107	0.080901	0.451438			-0.116721	0.234443	9.14161	0.0805736	0.108502	5.35875		0.00613962	-0.091077	-0.142175	0.0302135	0.0909497	0.453562
-1.89	-0.0131458	-0.0777424	0.0284308	0.0430431	0.0806756	0.453565			-0.116038	0.235936	9.32715	0.0797579	0.108331	5.38196		0.003719	-0.0899923	-0.147109	0.0331592	0.0917112	0.448606
-1.889	-0.0118478	-0.0791164	0.0316662	0.0444743	0.079751	0.452102			-0.117014	0.235795	9.51083	0.0786392	0.106619	5.48448		0.00154043	-0.0878565	-0.144673	0.030163	0.0934489	0.456781
-1.888	-0.0122577	-0.0798495	0.0310635	0.0450353	0.0790252	0.460616			-0.120525	0.238635	9.67534	0.0811059	0.106637	5.60986		0.00186319	-0.0866568	-0.12028	0.0315812	0.0937073	0.467124
-1.887	-0.0144438	-0.0805292	0.0303246	0.0460613	0.0789628	0.458447			-0.121793	0.240496	9.71386	0.0811388	0.106342	5.57612		0.000249439	-0.0874483	-0.109789	0.0341016	0.0936032	0.463251
-1.886	-0.0138973	-0.0807827	0.0296869	0.0459649	0.0790326	0.458946			-0.119452	0.242457	9.77779	0.0786041	0.10564	5.53173		-0.00289737	-0.0882606	-0.120968	0.0334766	0.0932246	0.470481
-1.885	-0.0132141	-0.0806427	0.0243857	0.0442532	0.0797052	0.452517			-0.121793	0.243542	9.91558	0.0812344	0.105232	5.52146		-0.0059635	-0.0877713	-0.119569	0.0294793	0.0924003	0.477486
-1.884	-0.00838637	-0.0813293	0.0242469	0.0434203	0.0798865	0.447065			-0.124232	0.244068	9.99436	0.083268	0.105653	5.51399		-0.00370425	-0.0892179	-0.117292	0.0310323	0.0911534	0.4891
-1.883	-0.00645072	-0.0815659	0.0287524	0.0451839	0.0800395	0.441931			-0.126086	0.244736	9.98195	0.0789652	0.106189	5.49358		0.000168751	-0.0887962	-0.11148	0.033949	0.0895364	0.495603
-1.882	-0.00626854	-0.0821233	0.0292431	0.0457778	0.0798114	0.449541			-0.124135	0.245079	9.94492	0.077468	0.10557	5.4852		0.0043645	-0.0897963	-0.108509	0.0363419	0.0878882	0.497262
-1.881	-0.00690617	-0.0825377	0.0235855	0.0437884	0.0801226	0.450865			-0.127549	0.246127	9.93236	0.080576	0.103876	5.45134		0.00573619	-0.091262	-0.127359	0.0356265	0.086529	0.496188
-1.88	-0.00378634	-0.083193	0.0208538	0.0429733	0.0806012	0.451687			-0.129207	0.245979	9.88576	0.0783537	0.104831	5.45469		0.00323488	-0.09266	-0.124822	0.0348033	0.0850359	0.479252
-1.879	-0.00226059	-0.0832317	0.0146051	0.0409587	0.0811693	0.448269			-0.129695	0.248589	9.87783	0.0776665	0.104517	5.45389		0.00492931	-0.092403	-0.135671	0.0325659	0.0841032	0.491302
-1.878	0.000585961	-0.0830753	0.014111	0.0404083	0.0817585	0.44276			-0.134572	0.247548	9.92205	0.0800152	0.103572	5.49313		0.00702719	-0.0925724	-0.144025	0.0313119	0.0829035	0.493398
-1.877	-0.000165531	-0.0833521	0.022299	0.0396319	0.0819111	0.44452			-0.13623	0.248242	9.95002	0.0785201	0.100828	5.5379		0.00904438	-0.0926559	-0.145739	0.0317567	0.0832768	0.48798
-1.876	-0.00141801	-0.0838137	0.0179687	0.0423342	0.0823422	0.438945			-0.136035	0.251548	9.91951	0.0786287	0.101346	5.48488		0.00880231	-0.0924453	-0.135848	0.0320548	0.0844713	0.489196
-1.875	-0.00499328	-0.0835538	0.025494	0.039417	0.0835193	0.440078			-0.138181	0.252052	9.86846	0.0744493	0.100973	5.43307		0.00452587	-0.0917939	-0.129032	0.0325956	0.0834527	0.484047
-1.874	-0.00487942	-0.0841461	0.0322305	0.0385534	0.082575	0.448569			-0.14501	0.25367	9.90741	0.0795205	0.101383	5.42385		7.37449e-06	-0.0927134	-0.136674	0.0319811	0.0829393	0.489599
-1.873	-0.0033309	-0.0838502	0.0283112	0.0377882	0.0829228	0.449824			-0.1454	0.256138	9.85883	0.078084	0.100567	5.40743		-0.000154002	-0.0931367	-0.134429	0.0323704	0.0821658	0.476391
-1.872	-0.00355862	-0.0837171	0.0308357	0.037499	0.0831317	0.447012			-0.146961	0.258382	9.84215	0.075753	0.101567	5.37368		-0.00128362	-0.0930985	-0.147744	0.0313279	0.0806212	0.466275
-1.871	-0.00681508	-0.0834365	0.0276634	0.0382083	0.0839526	0.456136			-0.147741	0.260797	9.84985	0.0745	0.101296	5.40121		-0.0033815	-0.0943786	-0.154869	0.0312588	0.079175	0.472179
-1.87	-0.00797647	-0.0830536	0.0217266	0.0393579	0.0834949	0.448136			-0.146668	0.267429	9.84163	0.0795346	0.100354	5.39976		-0.00459181	-0.0956412	-0.155125	0.0320256	0.0774151	0.478088
-1.869	-0.00779429	-0.0825545	0.0174667	0.0395386	0.0844112	0.44399			-0.148326	0.269713	9.84685	0.0711636	0.0997361	5.39278		-0.0059635	-0.0940504	-0.145484	0.0313064	0.0764935	0.478918
-1.868	-0.0066329	-0.0813674	0.0121852	0.0380568	0.0852692	0.45049			-0.149497	0.274073	9.8712	0.0732119	0.100935	5.36979		-0.00612488	-0.0945477	-0.14999	0.027015	0.0754523	0.473991
-1.867	-0.00251109	-0.0817993	0.00762437	0.037869	0.0851591	0.4436			-0.151155	0.275921	9.9827	0.0754158	0.104348	5.34368		-0.00233257	-0.0957379	-0.141044	0.0269388	0.0746624	0.46754
-1.866	-0.00251109	-0.0814131	0.00495302	0.0392403	0.0855581	0.449007			-0.151936	0.275473	9.95654	0.0739637	0.105876	5.31924		-0.00055744	-0.0958906	-0.144526	0.0323031	0.0745197	0.454793
-1.865	-0.00212396	-0.081252	-9.25791e-05	0.0404804	0.0851449	0.448146			-0.151058	0.277003	9.88253	0.071058	0.105624	5.25962		0.00589756	-0.095284	-0.138641	0.0326344	0.0753722	0.44354
-1.864	-0.0021695	-0.0805017	-0.00736803	0.0400196	0.0847926	0.446407			-0.152618	0.278142	9.82273	0.0702807	0.103085	5.22188		0.00541344	-0.0968389	-0.135516	0.0330834	0.0741372	0.428294
-1.863	-9.72111e-05	-0.0794721	-0.00575066	0.03952	0.0852592	0.446727			-0.157301	0.278439	9.79225	0.0722911	0.103294	5.23214		0.00452587	-0.0958145	-0.140878	0.0318332	0.0747634	0.431896
-1.862	0.00215726	-0.0788314	-0.00592879	0.0400145	0.0859591	0.446048			-0.158276	0.278942	9.73761	0.0695345	0.102036	5.29558		0.00856025	-0.0958187	-0.144484	0.033436	0.0752276	0.449115
-1.861	0.00352361	-0.0780173	-0.00820191	0.0389384	0.0867575	0.449542			-0.160715	0.280137	9.77403	0.0705225	0.101482	5.29718		0.0112229	-0.096605	-0.148148	0.0316163	0.0753133	0.4424
-1.86	0.00126914	-0.0775292	-0.00228213	0.0385142	0.0872321	0.448795			-0.164227	0.281959	9.76811	0.0706023	0.102841	5.30159		0.0113036	-0.0970234	-0.139489	0.0324339	0.0765972	0.458806
-1.859	-0.00205564	-0.0755759	0.00390889	0.0391381	0.0885687	0.458986			-0.163836	0.28231	9.73501	0.0697764	0.104876	5.27711		0.0113036	-0.0979251	-0.13218	0.0308649	0.0763239	0.46172
-1.858	-0.00364971	-0.0736672	-0.00244525	0.0396056	0.0896982	0.464259			-0.164324	0.283144	9.72199	0.0674433	0.103334	5.27185		0.00872162	-0.0998015	-0.12881	0.0297854	0.0751031	0.474813
-1.857	-0.00410516	-0.0725908	0.00166208	0.0388975	0.0908834	0.464489			-0.167348	0.28413	9.78104	0.0671918	0.103717	5.33209		0.00525206	-0.10142	-0.122265	0.0319188	0.0741228	0.463541
-1.856	-0.0032398	-0.071116	0.00235714	0.0380326	0.0928596	0.459599			-0.170177	0.28606	9.73575	0.0707951	0.104778	5.30979		0.00420313	-0.103413	-0.121827	0.0322437	0.0734511	0.44737
-1.855	-0.00651904	-0.0690016	0.00834115	0.0378949	0.0940565	0.46472			-0.170957	0.289691	9.68371	0.0667594	0.10594	5.28598		0.00549412	-0.104201	-0.11262	0.0295891	0.073336	0.457428
-1.854	-0.0077032	-0.067393	0.0049944	0.0380635	0.094814	0.460993			-0.169104	0.29233	9.61388	0.066446	0.107265	5.20891		0.00638168	-0.104895	-0.106459	0.0274817	0.0728298	0.455099
-1.853	-0.0106408	-0.0653858	0.0028154	0.039272	0.0955131	0.46886			-0.169982	0.293623	9.61019	0.0682875	0.109786	5.15935		0.00202456	-0.105358	-0.09671	0.0298413	0.0740961	0.455133
-1.852	-0.00979827	-0.0642189	-0.0031804	0.0385968	0.0961635	0.470813			-0.173396	0.296939	9.68358	0.0648054	0.114053	5.11947		0.00379968	-0.106155	-0.0923551	0.0279172	0.0740482	0.47029
-1.851	-0.00790815	-0.061421	-0.00348241	0.0381709	0.0978089	0.469583			-0.17203	0.297548	9.71567	0.0629267	0.11454	5.11622		0.00267005	-0.107092	-0.0971341	0.0299522	0.0754201	0.472098
-1.85	-0.00553982	-0.0605595	-0.00734302	0.0392058	0.0965532	0.470347			-0.172518	0.297611	9.67837	0.0667051	0.115364	5.09175		0.00767268	-0.10861	-0.103605	0.0310909	0.0743777	0.491182
-1.849	-0.00615468	-0.0580662	-0.00730602	0.0389625	0.0976972	0.469149			-0.173884	0.297173	9.67238	0.0649984	0.1149	5.05859		0.0118684	-0.108839	-0.0989196	0.0304979	0.0733716	0.490724
-1.848	-0.00738439	-0.0555836	0.0013319	0.0400848	0.0982579	0.47523			-0.170372	0.296641	9.69647	0.0657458	0.113041	5.04503		0.0163869	-0.108709	-0.0969802	0.029781	0.0739122	0.485248
-1.847	-0.00670121	-0.0530481	0.00355942	0.0422689	0.0981288	0.473725			-0.171348	0.296607	9.64924	0.0651124	0.110932	5.01874		0.0146118	-0.110284	-0.108196	0.0329222	0.0729995	0.488404
-1.846	-0.00558536	-0.0513596	0.00269105	0.0425938	0.0981805	0.468772			-0.175932	0.294396	9.57804	0.0667669	0.107888	4.97493		0.0167097	-0.10942	-0.108462	0.0356846	0.0741108	0.494543
-1.845	-0.00360416	-0.0490631	-0.00282632	0.042644	0.0980556	0.459334			-0.179444	0.294172	9.55848	0.0646881	0.107153	4.96163		0.020502	-0.11074	-0.108277	0.0365558	0.0740476	0.482058
-1.844	-0.00387743	-0.045821	-0.0041325	0.0417342	0.0978752	0.467894			-0.177688	0.295787	9.52065	0.0669833	0.109172	4.94677		0.0217123	-0.111215	-0.107911	0.0334271	0.0735107	0.471821
-1.843	-0.00708834	-0.0446613	-0.00877795	0.0425265	0.0974879	0.462134			-0.178859	0.298105	9.47982	0.0666302	0.112456	4.94448		0.0245364	-0.111556	-0.102196	0.0341818	0.0733438	0.485204
-1.842	-0.0100715	-0.043048	-0.00225343	0.0421576	0.0978559	0.464693			-0.181297	0.300586	9.44095	0.0682631	0.110483	4.864		0.0204213	-0.112785	-0.103188	0.0340978	0.0724096	0.478166
-1.841	-0.0123715	-0.0407355	-0.00406083	0.042877	0.0977935	0.4669			-0.182078	0.303692	9.4305	0.0644045	0.111656	4.89362		0.0180814	-0.113149	-0.125218	0.0339938	0.0718292	0.485532
-1.84	-0.0114834	-0.039677	0.00131339	0.0424317	0.0975896	0.469291			-0.181493	0.305726	9.3982	0.0658499	0.114079	4.94249		0.0157414	-0.111158	-0.128693	0.0361701	0.0730682	0.491589
-1.839	-0.0130092	-0.0378888	-0.0098407	0.040731	0.0977218	0.47025			-0.183736	0.310491	9.37304	0.0681856	0.117164	4.90743		0.0167904	-0.111989	-0.133754	0.0352358	0.0721477	0.487849
-1.838	-0.0148993	-0.036095	-0.00662401	0.0381588	0.0977628	0.476202			-0.183151	0.313881	9.34562	0.0700857	0.119972	4.89672		0.0154187	-0.112012	-0.125946	0.0336541	0.0726196	0.490513
-1.837	-0.0174953	-0.0352007	0.000482818	0.037721	0.097511	0.472723			-0.180127	0.31764	9.33652	0.0671535	0.120897	4.86128		0.0155801	-0.112878	-0.116729	0.0326356	0.0730165	0.490612
-1.836	-0.0185884	-0.0343739	0.00380109	0.0391281	0.09754	0.478557			-0.178664	0.317082	9.33332	0.0673088	0.118422	4.824		0.0112229	-0.112438	-0.122773	0.0346923	0.0752965	0.486361
-1.835	-0.0177686	-0.0333602	-0.000713097	0.0386924	0.0973682	0.481043			-0.183248	0.318872	9.27848	0.0697544	0.117408	4.79312		0.0118684	-0.113237	-0.115956	0.0344289	0.0744808	0.494374
-1.834	-0.0157874	-0.0325956	0.00407371	0.0390134	0.0971541	0.486734			-0.179054	0.318363	9.20992	0.0662475	0.116575	4.77347		0.0152573	-0.111337	-0.113032	0.0357792	0.0749421	0.491225
-1.833	-0.013829	-0.0305172	0.00464115	0.0394105	0.0977668	0.488033			-0.177883	0.319904	9.13288	0.070999	0.114931	4.72029		0.0199372	-0.111692	-0.124638	0.0353579	0.0765227	0.487192
-1.832	-0.0154458	-0.0293672	0.0041328	0.0394029	0.097656	0.485421			-0.1772	0.325449	9.05495	0.0728835	0.117119	4.67996		0.0239716	-0.112406	-0.131134	0.0337993	0.076873	0.487938
-1.831	-0.0155141	-0.0287444	-0.00124161	0.0387632	0.0979037	0.482271			-0.17564	0.330672	8.9775	0.0739245	0.117927	4.6169		0.0238102	-0.113403	-0.119979	0.0345924	0.0770695	0.486347
-1.83	-0.0141933	-0.0291475	0.000299661	0.042088	0.0973662	0.483214			-0.170762	0.332398	8.90076	0.0741086	0.116248	4.58198		0.0263922	-0.114827	-0.120872	0.0347684	0.0753635	0.480157
-1.829	-0.0139884	-0.0285672	0.0039305	0.0445975	0.0971637	0.484773			-0.17603	0.337707	8.84462	0.0775172	0.114813	4.55782		0.0276025	-0.116541	-0.115484	0.0366734	0.0740095	0.486146
-1.828	-0.011825	-0.0286667	-3.94359e-05	0.0415993	0.0963508	0.477201			-0.177883	0.340298	8.7528	0.0798866	0.115626	4.50158		0.0290549	-0.116822	-0.100045	0.0365811	0.0736083	0.489485
-1.827	-0.0129409	-0.0287862	0.00719818	0.0406364	0.0964573	0.470214			-0.174762	0.342198	8.67049	0.0818366	0.118128	4.47606		0.0288935	-0.116973	-0.101308	0.034436	0.0723367	0.493017
-1.826	-0.0164023	-0.0287339	0.0117546	0.0416464	0.0953459	0.467084			-0.17203	0.344478	8.58809	0.084223	0.12024	4.43324		0.0317176	-0.117237	-0.115789	0.0360765	0.0733638	0.493193
-1.825	-0.0187934	-0.029235	0.013301	0.042005	0.0944673	0.469073			-0.176713	0.35089	8.52833	0.0861818	0.127834	4.42101		0.0255046	-0.118139	-0.105395	0.0361434	0.0728522	0.50969
-1.824	-0.019932	-0.0297381	0.0178046	0.0405757	0.0932282	0.474915			-0.174274	0.355314	8.42429	0.0869764	0.131144	4.3807		0.0229226	-0.117907	-0.110826	0.0370944	0.0747564	0.505471
-1.823	-0.019135	-0.0294328	0.0100597	0.0407967	0.0925021	0.474121			-0.171738	0.360521	8.36715	0.0910055	0.128616	4.3903		0.0221158	-0.118474	-0.103914	0.0391103	0.0753563	0.5083
-1.822	-0.0205924	-0.0296554	0.00867391	0.0379944	0.0921846	0.480376			-0.170957	0.365401	8.28323	0.093723	0.142995	4.36587		0.0214703	-0.120115	-0.107939	0.0412056	0.0760282	0.499639
-1.821	-0.0212983	-0.029183	0.0122007	0.038378	0.092326	0.480922			-0.169299	0.368378	8.19427	0.100754	0.145635	4.32198		0.0204213	-0.120241	-0.105093	0.0346569	0.0775797	0.495936
-1.82	-0.0237122	-0.0286228	0.00560564	0.0359773	0.0920947	0.472307			-0.163251	0.375709	8.09672	0.0962773	0.155165	4.27116		0.0218737	-0.121632	-0.0958092	0.0349246	0.0767801	0.487803
-1.819	-0.0248053	-0.0292944	0.0122962	0.0373154	0.0921629	0.469278			-0.16052	0.380157	7.9903	0.102779	0.152647	4.21169		0.0180007	-0.122377	-0.0947838	0.0367414	0.0777435	0.502775
-1.818	-0.0223686	-0.0297915	0.012388	0.0375529	0.0921069	0.46829			-0.16013	0.383748	7.88652	0.107694	0.152674	4.16238		0.0182427	-0.123425	-0.0968861	0.0346312	0.0787194	0.49185
-1.817	-0.0196587	-0.0297745	0.00963459	0.0374737	0.0908489	0.467193			-0.154277	0.386425	7.7937	0.109149	0.151494	4.11164		0.0224385	-0.125309	-0.0928343	0.0372562	0.0784752	0.491461
-1.816	-0.0193171	-0.029885	0.00279561	0.0372022	0.0905715	0.467603			-0.151058	0.390577	7.72192	0.112518	0.151763	4.10287		0.0259081	-0.127145	-0.097933	0.0352934	0.0769138	0.490836
-1.815	-0.0195221	-0.0297214	0.00319503	0.038366	0.0900689	0.464127			-0.146961	0.392142	7.68198	0.118876	0.154043	4.01219		0.0274411	-0.128663	-0.0845441	0.0333792	0.075643	0.485584
-1.814	-0.019932	-0.028915	0.00488802	0.038159	0.0902101	0.463134			-0.147253	0.396215	7.61233	0.121978	0.156789	3.94488		0.028248	-0.130198	-0.0735814	0.031452	0.0747489	0.495722
-1.813	-0.0170854	-0.0288916	0.00580158	0.0385563	0.0904532	0.466423			-0.141596	0.39657	7.55093	0.123165	0.158214	3.87999		0.0297811	-0.131359	-0.0574208	0.0324727	0.0737978	0.502034
-1.812	-0.015833	-0.0284491	0.00878373	0.0409581	0.0904827	0.465114			-0.140425	0.40082	7.47892	0.130661	0.159502	3.84389		0.0293776	-0.13269	-0.0540222	0.0340589	0.0730402	0.494842
-1.811	-0.0142844	-0.0282782	0.0109245	0.0407144	0.0909019	0.462682			-0.138279	0.404478	7.38181	0.137175	0.159009	3.80999		0.0313948	-0.134456	-0.054941	0.0333744	0.0715168	0.492014
-1.81	-0.0150359	-0.0277502	0.0113665	0.0378747	0.0913104	0.470442			-0.134084	0.407365	7.30541	0.141365	0.162448	3.7616		0.0319596	-0.135953	-0.0752499	0.0311295	0.0699702	0.489943
-1.809	-0.0171765	-0.0277457	0.0110045	0.037957	0.0913695	0.476695			-0.129987	0.410349	7.21218	0.147334	0.16676	3.7201		0.0322017	-0.136213	-0.0687185	0.0328089	0.0694346	0.487327
-1.808	-0.0209112	-0.026965	0.00952078	0.0384046	0.0910976	0.473995			-0.127841	0.416086	7.16744	0.150221	0.175575	3.74191		0.0263922	-0.13729	-0.0735469	0.0351654	0.0686709	0.485672
-1.807	-0.0190666	-0.0271354	0.0103021	0.0389081	0.0907412	0.481599			-0.126183	0.418774	7.08306	0.156183	0.181695	3.71172		0.0234874	-0.13784	-0.0770326	0.0338975	0.0684016	0.499515
-1.806	-0.0171082	-0.026674	0.00770092	0.0368028	0.090961	0.482062			-0.121403	0.421839	6.99646	0.158811	0.187902	3.65889		0.0255046	-0.138606	-0.0763016	0.0354574	0.0679254	0.501117
-1.805	-0.0199775	-0.0257517	0.00895875	0.037153	0.091604	0.48264			-0.115453	0.423037	6.90547	0.166563	0.192728	3.60704		0.021793	-0.138265	-0.0718744	0.0347496	0.0681468	0.506792
-1.804	-0.0204558	-0.0259335	0.00839676	0.0372778	0.0914702	0.489082			-0.109698	0.42736	6.85238	0.171227	0.201147	3.57609		0.0195337	-0.137811	-0.0733858	0.0313272	0.0700454	0.513339
-1.803	-0.0216171	-0.025532	0.0112203	0.0359773	0.0912686	0.485873			-0.104332	0.431593	6.77256	0.177432	0.208483	3.53413		0.0192917	-0.137746	-0.0698092	0.0325744	0.0703977	0.498701
-1.802	-0.0196132	-0.0253738	0.0153533	0.0350371	0.091519	0.483629			-0.097309	0.434492	6.69346	0.183421	0.209254	3.49076		0.0173552	-0.137258	-0.0818919	0.0321294	0.0716037	0.50305
-1.801	-0.0163795	-0.0255441	0.0133789	0.0377299	0.0916937	0.483192			-0.0919439	0.435228	6.59031	0.190728	0.212674	3.44055		0.0154994	-0.13707	-0.0819352	0.0327274	0.0730522	0.496118
-1.8	-0.0139656	-0.0258273	0.00436173	0.0369244	0.0909798	0.483732			-0.0854082	0.433695	6.57993	0.196075	0.217386	3.52395		0.0188882	-0.137749	-0.076359	0.0326039	0.0734191	0.493964
-1.799	-0.0129181	-0.0264914	0.00598281	0.0365446	0.0903866	0.484577			-0.077897	0.441999	6.50302	0.201405	0.230645	3.48847		0.0265536	-0.136655	-0.0663937	0.0347441	0.0756614	0.50637
-1.798	-0.0133508	-0.0264103	0.00279178	0.0366522	0.0897822	0.494603			-0.0673619	0.445136	6.41942	0.206803	0.233679	3.43655		0.0244557	-0.136222	-0.0798421	0.0329082	0.0766331	0.50897
-1.797	-0.0121666	-0.0260072	0.0145621	0.0381381	0.0894926	0.49235			-0.0654109	0.451102	6.36341	0.216387	0.239646	3.41586		0.0249398	-0.134882	-0.0736608	0.031139	0.0782281	0.51017
-1.796	-0.00970717	-0.0261918	0.0157347	0.0365702	0.0893187	0.48757			-0.0608262	0.455959	6.36551	0.219586	0.248053	3.42368		0.0272797	-0.132791	-0.0662534	0.0298288	0.0803726	0.513909
-1.795	-0.00708834	-0.0263633	0.010153	0.0364852	0.0887177	0.488061			-0.0529248	0.46089	6.29912	0.226622	0.255162	3.39993		0.0286514	-0.131638	-0.0586734	0.0285518	0.0808648	0.514774
-1.794	-0.00599526	-0.0252649	0.00555413	0.0381287	0.0893663	0.492078			-0.0463892	0.464236	6.22721	0.234584	0.257979	3.36138		0.0297004	-0.13063	-0.0472787	0.0269322	0.0823744	0.515422
-1.793	-0.00790815	-0.0247458	0.000139052	0.0377064	0.0902517	0.491376			-0.0400486	0.472222	6.1427	0.240548	0.263976	3.32356		0.0292162	-0.129598	-0.0355573	0.0270801	0.082276	0.526598
-1.792	-0.00913786	-0.025035	-0.00538684	0.0369725	0.0906149	0.484489			-0.0340006	0.474418	6.07248	0.248938	0.269286	3.28863		0.0259888	-0.126458	-0.0474344	0.0268726	0.0858461	0.517029
-1.791	-0.0100488	-0.024997	-0.00693697	0.0374895	0.0906831	0.478671			-0.0262943	0.479485	5.98352	0.255346	0.271137	3.25384		0.0228419	-0.125491	-0.059001	0.029087	0.0848837	0.511537
-1.79	-0.00856855	-0.0256648	-0.01068	0.0390238	0.0905845	0.47657			-0.0204415	0.484752	5.91786	0.263174	0.278597	3.22819		0.0196144	-0.124068	-0.0580257	0.0279162	0.0865355	0.514452
-1.789	-0.00686062	-0.0256583	-0.00908467	0.0388341	0.0904954	0.477773			-0.0130279	0.493936	5.85553	0.268596	0.281292	3.19388		0.0194531	-0.123094	-0.0519934	0.0282859	0.0872882	0.508627
-1.788	-0.00827251	-0.0265898	-0.0125654	0.0387111	0.0894845	0.479926			-0.00102952	0.498726	5.77421	0.276206	0.281816	3.16175		0.0182427	-0.121778	-0.0421474	0.0281696	0.0863167	0.503111
-1.787	-0.00966162	-0.0272563	-0.00888394	0.0413703	0.0888176	0.481895			0.00940809	0.509733	5.71044	0.28472	0.288988	3.11202		0.0167904	-0.118587	-0.0164628	0.0298546	0.0873702	0.514001
-1.786	-0.0104814	-0.0285984	-0.00755803	0.0413311	0.0881966	0.483259			0.0178947	0.521117	5.62794	0.291461	0.294799	3.08973		0.0118684	-0.115627	-0.0197213	0.0283757	0.0886959	0.510711
-1.785	-0.00781706	-0.0288764	-0.00651286	0.0396896	0.0877153	0.479576			0.025601	0.533066	5.56628	0.296501	0.301228	3.04746		0.0129981	-0.111224	-0.00569558	0.0277481	0.0906993	0.516991
-1.784	-0.00396852	-0.0299492	-0.00456134	0.0398132	0.0867935	0.476619			0.0397454	0.544806	5.4794	0.303766	0.311969	3.01979		0.0130787	-0.107995	-0.0130576	0.0281827	0.0930712	0.520537
-1.783	-0.000757603	-0.0308936	-0.0101725	0.0427725	0.0868219	0.477869			0.0513536	0.563841	5.42377	0.314325	0.316044	3.00084		0.0180007	-0.105454	-0.0227711	0.0303597	0.0933709	0.526219
-1.782	-0.000302155	-0.0320747	-0.0103882	0.0416539	0.0872739	0.474335			0.0602304	0.577203	5.35153	0.319286	0.323146	2.972		0.0219544	-0.102554	-0.0313257	0.0331908	0.092642	0.524397
-1.781	-0.00043879	-0.0333756	-0.0106294	0.0400493	0.0872616	0.475334			0.0759356	0.584811	5.29461	0.325196	0.324191	2.93063		0.0213896	-0.100798	-0.0488946	0.0329144	0.0922915	0.517989
-1.78	0.00170182	-0.0348802	-0.0142634	0.0405658	0.0877912	0.470722			0.0846173	0.602118	5.22267	0.333848	0.333817	2.89153		0.020502	-0.0967227	-0.0590995	0.0281563	0.0951814	0.516292
-1.779	0.00475332	-0.0363791	-0.0163008	0.0390298	0.0874502	0.464718			0.0934941	0.613308	5.15051	0.339756	0.342684	2.85089		0.0217123	-0.0944501	-0.0643119	0.0275614	0.0950108	0.508986
-1.778	0.0062563	-0.0380392	-0.0178648	0.0392458	0.0870287	0.461967			0.105785	0.624896	5.10028	0.347381	0.349788	2.81835		0.0235681	-0.090846	-0.0732259	0.0262276	0.0961247	0.499823
-1.777	0.00734938	-0.0396868	-0.0313202	0.0405431	0.086669	0.462333			0.119344	0.640362	5.03973	0.353986	0.346442	2.8036		0.0245364	-0.0895342	-0.0820699	0.026711	0.0965146	0.501862
-1.776	0.00425233	-0.0409579	-0.0266416	0.0400625	0.0859222	0.463031			0.129099	0.651976	4.9732	0.362122	0.34848	2.78181		0.0226806	-0.088181	-0.087506	0.0276266	0.0965663	0.510421
-1.775	0.00206617	-0.0423774	-0.0266119	0.0388335	0.0853511	0.462414			0.140024	0.665459	4.90522	0.367041	0.347029	2.74186		0.0192917	-0.0881474	-0.097109	0.0281802	0.0963986	0.506471
-1.774	0.00299984	-0.0438225	-0.0290591	0.0395057	0.0850166	0.460396			0.153681	0.677651	4.82722	0.376227	0.348209	2.70101		0.0158221	-0.0874894	-0.104964	0.0284782	0.0950645	0.505395
-1.773	0.00486718	-0.0451216	-0.0302807	0.039301	0.0850236	0.459098			0.165094	0.688412	4.76133	0.382825	0.347354	2.66959		0.0141277	-0.0854237	-0.105393	0.0256397	0.0945138	0.508332
-1.772	0.00566422	-0.0467032	-0.0371409	0.0422016	0.0842075	0.462972			0.177288	0.700631	4.70938	0.388193	0.347024	2.62898		0.0120298	-0.0839433	-0.104513	0.0285794	0.0934011	0.511007
-1.771	0.00395629	-0.0482168	-0.0361075	0.0437862	0.0833558	0.460441			0.197285	0.713715	4.64193	0.395894	0.353911	2.6074		0.012756	-0.0822138	-0.115065	0.0301394	0.0938945	0.502842
-1.77	0.00224835	-0.0495912	-0.0373852	0.0441245	0.0833052	0.454655			0.212697	0.722104	4.56495	0.404893	0.358033	2.58401		0.00807612	-0.0806219	-0.102176	0.030811	0.0947622	0.499397
-1.769	0.00124636	-0.0513585	-0.0422726	0.0433332	0.082295	0.446448			0.228207	0.730598	4.50985	0.414439	0.356931	2.55541		0.00589755	-0.0800948	-0.115058	0.0285877	0.0947581	0.488646
-1.768	0.00543649	-0.0524778	-0.0392793	0.04316	0.0821245	0.451183			0.240693	0.74457	4.46883	0.418761	0.360776	2.5305		0.00492931	-0.078079	-0.122853	0.0310896	0.0959447	0.500197
-1.767	0.0093989	-0.0540896	-0.0411956	0.0440092	0.0815853	0.45253			0.261081	0.763989	4.39811	0.423055	0.368821	2.49916		0.00751131	-0.0749847	-0.108299	0.0319347	0.0958422	0.521948
-1.766	0.0114029	-0.0545239	-0.0464092	0.0446657	0.0816723	0.449108			0.278835	0.777958	4.35335	0.432797	0.367788	2.47538		0.0118684	-0.0744265	-0.102375	0.0329388	0.09711	0.536672
-1.765	0.0107652	-0.0558936	-0.0447262	0.0440061	0.0820535	0.444706			0.294052	0.785455	4.29655	0.437941	0.366241	2.46669		0.0121912	-0.0725043	-0.0928807	0.036735	0.0989742	0.52312
-1.764	0.0107425	-0.056636	-0.0440065	0.0428954	0.0815671	0.456397			0.310538	0.799501	4.23681	0.445206	0.3725	2.43555		0.0130788	-0.0727262	-0.0922786	0.0353136	0.0999096	0.515977
-1.763	0.0135435	-0.0573607	-0.0445024	0.0394227	0.081583	0.458312			0.330047	0.809191	4.17068	0.452344	0.374963	2.39937		0.0121912	-0.0702385	-0.0794078	0.0312191	0.100697	0.515461
-1.762	0.0151148	-0.0587615	-0.0427282	0.0387394	0.0813983	0.453365			0.343899	0.832558	4.12166	0.457819	0.385918	2.37669		0.0139663	-0.0715868	-0.0732319	0.03087	0.0998306	0.511877
-1.761	0.0183712	-0.059914	-0.0426884	0.0389294	0.0810025	0.450408			0.358824	0.842393	4.07216	0.463559	0.389974	2.35197		0.0174359	-0.0702618	-0.0850278	0.0302479	0.0991333	0.507003
-1.76	0.0160257	-0.0603815	-0.0443324	0.0399657	0.0806543	0.446971			0.381455	0.853424	4.01669	0.467493	0.393576	2.31906		0.0180814	-0.0711145	-0.0848693	0.0318363	0.0972044	0.503893
-1.759	0.0135435	-0.0614769	-0.0399978	0.038156	0.0801695	0.446788			0.398525	0.870576	3.97012	0.478228	0.395329	2.30315		0.0129174	-0.0718871	-0.0878682	0.0336641	0.0958326	0.488357
-1.758	0.0113573	-0.061847	-0.0384922	0.0375081	0.0798971	0.454486			0.413548	0.889537	3.92224	0.481657	0.403113	2.26119		0.00880231	-0.0732433	-0.0774139	0.0316019	0.0949514	0.474531
-1.757	0.0119949	-0.0617046	-0.0353103	0.0366145	0.0795131	0.463494			0.433057	0.907413	3.88873	0.489179	0.417556	2.25977		0.00638169	-0.0743093	-0.0734411	0.0310915	0.0929378	0.474021
-1.756	0.0129969	-0.062423	-0.0321967	0.0374626	0.079868	0.471209			0.449738	0.923178	3.83047	0.495	0.417023	2.22047		0.00396106	-0.0763053	-0.0725104	0.0299175	0.0917191	0.462452
-1.755	0.0124959	-0.0631615	-0.02514	0.0370545	0.0798038	0.470338			0.46993	0.939223	3.78949	0.501405	0.413446	2.17696		0.00533274	-0.0769474	-0.0706955	0.0285071	0.0903184	0.453702
-1.754	0.0111751	-0.0633597	-0.0281799	0.040967	0.08054	0.469987			0.492269	0.960651	3.74424	0.504984	0.420665	2.14888		0.00428382	-0.0749287	-0.0507434	0.0323942	0.0896186	0.452134
-1.753	0.00928503	-0.0635848	-0.0251262	0.0392153	0.0816303	0.474619			0.514315	0.971536	3.70375	0.512922	0.426108	2.11568		0.00234731	-0.0758172	-0.0542274	0.0315072	0.08901	0.467183
-1.752	0.00985434	-0.06378	-0.0288673	0.0378881	0.081201	0.473032			0.535092	0.987858	3.66899	0.5212	0.4229	2.08812		-0.00112225	-0.0748876	-0.0363936	0.0283369	0.0902025	0.464478
-1.751	0.0135663	-0.0637288	-0.0258509	0.0382447	0.082033	0.479641			0.553529	1.00146	3.6121	0.5242	0.419664	2.0403		-0.000154002	-0.0745494	-0.0428856	0.0287354	0.0899646	0.456063
-1.75	0.0173465	-0.0642646	-0.0259403	0.0391922	0.0821803	0.480431			0.576745	1.01622	3.55156	0.527564	0.425256	2.01879		0.00331556	-0.0747136	-0.0491342	0.0304897	0.0890066	0.474824
-1.749	0.0178019	-0.0640444	-0.0300965	0.0398364	0.0828887	0.485619			0.600742	1.02591	3.51496	0.533956	0.423293	1.99695		0.00533275	-0.0753538	-0.0525567	0.0346761	0.0878978	0.472135
-1.748	0.0163445	-0.0641349	-0.0259042	0.0382079	0.0831294	0.487188			0.621617	1.03852	3.47864	0.538541	0.417805	1.98748		0.00856025	-0.0749679	-0.0496257	0.0337697	0.086847	0.476124
-1.747	0.0166405	-0.0642261	-0.0269869	0.0370049	0.0828138	0.498054			0.643663	1.05536	3.4324	0.543444	0.414097	1.97077		0.010174	-0.0761263	-0.0469958	0.0352328	0.0860899	0.478489
-1.746	0.0201019	-0.0641803	-0.0263381	0.0361859	0.0834772	0.494521			0.666684	1.07748	3.3836	0.547611	0.419424	1.94272		0.00993193	-0.0762133	-0.0430751	0.0325766	0.0853113	0.486323
-1.745	0.0222198	-0.0638478	-0.0359594	0.0336255	0.084265	0.501258			0.686974	1.10583	3.34091	0.553418	0.431088	1.9121		0.0133208	-0.0756144	-0.0482627	0.029861	0.083689	0.490128
-1.744	0.0233812	-0.0637298	-0.0350268	0.034696	0.0842797	0.502461			0.70541	1.122	3.29914	0.554912	0.426318	1.90059		0.0150152	-0.0756628	-0.0493752	0.0307498	0.0829918	0.496686
-1.743	0.0199198	-0.0630035	-0.0324395	0.0351279	0.0851265	0.505095			0.729212	1.14111	3.27262	0.559576	0.426262	1.86857		0.0159835	-0.0758229	-0.0620171	0.0311923	0.0835457	0.493359
-1.742	0.0168227	-0.0629755	-0.0293616	0.0343143	0.0853371	0.503955			0.752623	1.15054	3.23037	0.565857	0.427807	1.85707		0.0118684	-0.0760642	-0.0765785	0.0309498	0.0834862	0.482554
-1.741	0.0155019	-0.0630349	-0.0190477	0.0334786	0.0850222	0.501912			0.77223	1.1593	3.19694	0.568491	0.429246	1.83329		0.0095285	-0.0756612	-0.0614598	0.030888	0.0845439	0.484868
-1.74	0.016094	-0.0629539	-0.0165038	0.0338906	0.0846179	0.494425			0.793886	1.17911	3.15402	0.572412	0.42723	1.81899		0.00831819	-0.074998	-0.0440044	0.0306985	0.0854276	0.485579
-1.739	0.0155474	-0.0617928	-0.0219666	0.0331863	0.0853586	0.499428			0.817688	1.19054	3.11337	0.574118	0.425782	1.7959		0.00847956	-0.0746915	-0.052682	0.0277564	0.0860686	0.49126
-1.738	0.0145227	-0.0606344	-0.0233453	0.0327254	0.0858586	0.494772			0.843343	1.21142	3.0842	0.578599	0.434723	1.78068		0.00815681	-0.0743183	-0.0585849	0.0281014	0.0868145	0.490239
-1.737	0.0121316	-0.0604411	-0.0166686	0.0331213	0.0860446	0.491424			0.865291	1.22641	3.0443	0.581433	0.438297	1.73757		0.00646237	-0.0747393	-0.0528917	0.029429	0.086887	0.494618
-1.736	0.0107425	-0.0604079	-0.0130683	0.0354407	0.0859265	0.484686			0.891531	1.24776	3.00843	0.586063	0.450326	1.72945		0.00484861	-0.0749611	-0.0381893	0.0278652	0.0868165	0.486865
-1.735	0.0115623	-0.0598155	-0.0180164	0.0337215	0.0862977	0.477787			0.917869	1.26456	2.96974	0.5898	0.458415	1.72111		0.00145974	-0.0757376	-0.0260515	0.0288505	0.0867556	0.481681
-1.734	0.0147049	-0.0605145	-0.0232249	0.0347623	0.0860742	0.480512			0.938354	1.28528	2.93785	0.59056	0.460939	1.69668		0.00509068	-0.0767598	-0.02858	0.0282458	0.0856623	0.479096
-1.733	0.0173237	-0.0584453	-0.017716	0.0353953	0.0876242	0.481661			0.962643	1.30696	2.88571	0.591747	0.462821	1.68303		0.0109002	-0.0778001	-0.0362278	0.0284467	0.0851767	0.474005
-1.732	0.0167544	-0.0578503	-0.0184694	0.0363083	0.0881244	0.476647			0.988006	1.32426	2.8484	0.593062	0.457929	1.67147		0.0154187	-0.0792927	-0.0396478	0.0300856	0.0835219	0.486066
-1.731	0.0148871	-0.056879	-0.024402	0.0366365	0.0887357	0.480464			1.01581	1.34381	2.80541	0.59769	0.459456	1.63584		0.0145311	-0.0796422	-0.040338	0.030715	0.0816875	0.479834
-1.73	0.0145455	-0.0548356	-0.030663	0.0365359	0.0895264	0.480267			1.03571	1.36643	2.78399	0.59711	0.45613	1.60343		0.016629	-0.0807981	-0.0448267	0.0327802	0.0809578	0.46478
-1.729	0.0171415	-0.0529268	-0.0302099	0.0367208	0.0905175	0.481417			1.0597	1.38803	2.75608	0.59906	0.46613	1.57238		0.0185655	-0.0806637	-0.0488728	0.0338323	0.0822569	0.471449
-1.728	0.0192594	-0.051303	-0.0329456	0.0353689	0.0922393	0.486643			1.0836	1.39515	2.71659	0.600652	0.464859	1.56171		0.0225999	-0.0807055	-0.0461503	0.0316563	0.0819763	0.47117
-1.727	0.0185762	-0.0500532	-0.036762	0.0354744	0.0926056	0.486525			1.10526	1.40863	2.67967	0.600388	0.460913	1.55502		0.0215509	-0.0808464	-0.0416906	0.0322416	0.0832337	0.485126
-1.726	0.0146366	-0.0477156	-0.0329753	0.0360632	0.0944566	0.48694			1.12925	1.41997	2.65035	0.599293	0.458177	1.53384		0.021793	-0.0816711	-0.0455516	0.0311523	0.0841433	0.484233
-1.725	0.01179	-0.0460001	-0.0378083	0.0374236	0.0954396	0.485453			1.15598	1.4311	2.63007	0.602754	0.459812	1.52643		0.0219544	-0.0810726	-0.0537418	0.031575	0.0843577	0.482542
-1.724	0.0093989	-0.0435881	-0.0334398	0.0369632	0.0960845	0.473226			1.17783	1.44895	2.5803	0.605238	0.46254	1.5147		0.0175973	-0.0814143	-0.0578197	0.0326447	0.0839965	0.481312
-1.723	0.0106514	-0.0408519	-0.0356585	0.0365465	0.0973778	0.475779			1.19695	1.45979	2.55487	0.601168	0.458235	1.49549		0.0162256	-0.0815959	-0.0471685	0.0345682	0.0845976	0.478257
-1.722	0.0101504	-0.0386445	-0.034948	0.0350797	0.0976872	0.481164			1.22339	1.47001	2.52962	0.602443	0.454023	1.47697		0.01792	-0.0818247	-0.0477246	0.033535	0.0848978	0.471027
-1.721	0.00744046	-0.0353144	-0.0278972	0.0335995	0.0986844	0.488468			1.25041	1.48153	2.5033	0.604327	0.456219	1.47812		0.0180007	-0.081503	-0.0548292	0.0299881	0.0851173	0.46316
-1.72	0.00340974	-0.0334836	-0.0259846	0.0345996	0.0988072	0.485475			1.27382	1.49552	2.46792	0.601918	0.445075	1.45522		0.0150152	-0.0825884	-0.0675051	0.0315045	0.0830822	0.467708
-1.719	0.00265825	-0.0324148	-0.0277098	0.0363026	0.0985052	0.486076			1.29752	1.51149	2.44284	0.600597	0.441495	1.43964		0.014047	-0.0827292	-0.0768477	0.0312417	0.0827653	0.463801
-1.718	0.00457114	-0.0293499	-0.0227313	0.0366849	0.0994007	0.483918			1.32328	1.53513	2.41031	0.604417	0.449017	1.4053		0.0139663	-0.0835171	-0.0849748	0.0333477	0.0810444	0.455411
-1.717	0.00693947	-0.0261562	-0.0206646	0.0369506	0.0991463	0.480321			1.34747	1.55731	2.38065	0.600275	0.450613	1.37931		0.0160642	-0.0847101	-0.0816411	0.0337462	0.0794889	0.457752
-1.716	0.00885236	-0.0236209	-0.0177903	0.0370571	0.0996275	0.485855			1.37059	1.57864	2.34333	0.597925	0.447921	1.36176		0.0196951	-0.0825463	-0.0777787	0.0322431	0.080018	0.469655
-1.715	0.00744047	-0.021133	-0.0189106	0.0377643	0.0997959	0.476469			1.39546	1.61325	2.31162	0.5986	0.439315	1.35665		0.0259887	-0.0835499	-0.0882966	0.032829	0.078785	0.468554
-1.714	0.00607412	-0.0188121	-0.0121797	0.0391141	0.100035	0.475388			1.42112	1.63451	2.28458	0.599616	0.440244	1.33132		0.0255853	-0.0841005	-0.095915	0.0320209	0.0783244	0.462758
-1.713	0.00614244	-0.0183494	-0.00704365	0.0404266	0.0996419	0.472901			1.44102	1.6546	2.26027	0.594269	0.436037	1.32008		0.0245364	-0.0853351	-0.0889234	0.0367269	0.0779997	0.469531
-1.712	0.00892068	-0.0167366	-0.0090214	0.0406887	0.0990118	0.469416			1.4617	1.66328	2.23791	0.591718	0.43919	1.3224		0.0289742	-0.0849166	-0.0892254	0.0369973	0.0787461	0.458908
-1.711	0.00948999	-0.0141808	-0.0137498	0.0404228	0.0985199	0.474647			1.48706	1.67961	2.21226	0.591482	0.440821	1.29767		0.0322824	-0.0834994	-0.105831	0.0341772	0.0783156	0.471087
-1.71	0.00759988	-0.0132219	-0.00917449	0.0402651	0.0978755	0.476379			1.51008	1.6905	2.17298	0.590477	0.441868	1.28635		0.0317983	-0.081914	-0.112478	0.0329984	0.0789566	0.476943
-1.709	0.00274935	-0.0123219	-0.0109304	0.0403639	0.0976041	0.471854			1.53203	1.70183	2.15436	0.586769	0.435886	1.27952		0.0309107	-0.0818166	-0.1098	0.0324174	0.0798565	0.486472
-1.708	-0.000279383	-0.0109321	-0.0128369	0.0398313	0.0973212	0.471309			1.55398	1.72349	2.12539	0.584514	0.442161	1.26917		0.029539	-0.082182	-0.117722	0.0335456	0.0803245	0.49066
-1.707	-0.000393242	-0.0105356	-0.0168628	0.0410316	0.0967627	0.472189			1.5771	1.73667	2.12225	0.585	0.436319	1.25535		0.0255853	-0.0830665	-0.123529	0.0368436	0.0800982	0.483317
-1.706	-0.00107642	-0.00970401	-0.0140128	0.039161	0.096571	0.465192			1.59875	1.75879	2.10284	0.577264	0.439296	1.2398		0.0246978	-0.0832666	-0.135107	0.0375747	0.0786267	0.484577
-1.705	-0.0016685	-0.00737202	-0.0146055	0.0371521	0.0960491	0.467824			1.61885	1.7735	2.07766	0.575183	0.441837	1.23045		0.024375	-0.0837892	-0.125593	0.0352123	0.0769716	0.497388
-1.704	-0.00526655	-0.00597354	-0.012134	0.0349482	0.0959507	0.463156			1.64353	1.78692	2.06094	0.573314	0.429488	1.21211		0.0236488	-0.0845175	-0.118375	0.0331216	0.0767108	0.49296
-1.703	-0.00676953	-0.00527094	-0.0116238	0.0350806	0.0961338	0.459593			1.6685	1.80723	2.03488	0.571403	0.426485	1.20833		0.0206634	-0.0852276	-0.117803	0.0355821	0.0769186	0.497463
-1.702	-0.00856855	-0.00446586	-0.0123035	0.0365495	0.0969325	0.454625			1.6885	1.82831	2.00794	0.565993	0.427463	1.19283		0.0207441	-0.0849438	-0.123711	0.0325015	0.0800811	0.493365
-1.701	-0.00490219	-0.00314407	-0.0102629	0.0371145	0.0977918	0.453779			1.70957	1.84355	1.98123	0.562499	0.433163	1.18157		0.0206634	-0.0848695	-0.138605	0.03397	0.0794791	0.503039
-1.7	-0.00198732	-0.00291536	-0.00643763	0.0363616	0.0968174	0.456094			1.73581	1.85074	1.95215	0.557869	0.434954	1.16942		0.0255853	-0.0836095	-0.141222	0.0353345	0.0818955	0.500931
-1.699	-0.00185069	-0.00265122	-0.0107442	0.0371753	0.0971856	0.460462			1.75532	1.86567	1.92795	0.553702	0.437552	1.15018		0.0271991	-0.0836829	-0.131306	0.0324917	0.0834814	0.505825
-1.698	-0.00435565	-0.00328369	-0.00704512	0.0360002	0.0961311	0.451642			1.77775	1.87849	1.905	0.55043	0.434886	1.12765		0.0317982	-0.0854942	-0.134176	0.0318121	0.0836591	0.50427
-1.697	-0.00376357	-0.00314268	-0.0113499	0.0383462	0.0956891	0.45772			1.79902	1.89273	1.87964	0.548427	0.42977	1.1243		0.0317176	-0.0870508	-0.138965	0.0344565	0.084256	0.500008
-1.696	-0.00360416	-0.00260866	-0.0109816	0.0403328	0.095739	0.457782			1.82038	1.9125	1.83826	0.542753	0.433581	1.11018		0.031879	-0.088457	-0.139907	0.0363241	0.0841085	0.5087
-1.695	-0.000552651	-0.00203498	-0.0159614	0.0397792	0.0955354	0.465721			1.83657	1.92803	1.81189	0.537519	0.434474	1.08905		0.0338961	-0.0890305	-0.138069	0.03345	0.0836024	0.501313
-1.694	-0.000871468	-0.00128552	-0.0100946	0.0387746	0.0949454	0.468242			1.85833	1.94656	1.79552	0.530013	0.438685	1.07409		0.0379305	-0.0905837	-0.145782	0.0320191	0.0839378	0.512214
-1.693	-0.00255663	-0.00145795	-0.00885127	0.0386679	0.0946287	0.467628			1.8791	1.9547	1.75963	0.53003	0.442737	1.07047		0.0363168	-0.0919534	-0.146599	0.0316904	0.0833254	0.532391
-1.692	-0.00672398	-0.00150137	-0.0141506	0.039546	0.0940322	0.464159			1.89871	1.96543	1.73188	0.521305	0.433689	1.06046		0.0330893	-0.0930799	-0.141828	0.032669	0.0829414	0.509016
-1.691	-0.00870518	-0.00194303	-0.0131671	0.0381706	0.0932336	0.45814			1.9149	1.97785	1.72071	0.517	0.437167	1.05124		0.0298618	-0.0936432	-0.145219	0.0320955	0.0811686	0.510628
-1.69	-0.00747547	-0.00187154	-0.0113398	0.0380408	0.092931	0.454376			1.93519	1.99396	1.69848	0.512537	0.424912	1.0414		0.0271184	-0.0944948	-0.147876	0.0367542	0.0807748	0.508442
-1.689	-0.00777152	-0.00302136	-0.0104832	0.0379581	0.0915675	0.455108			1.95324	2.00748	1.69073	0.506398	0.420129	1.02546		0.0267956	-0.0956092	-0.155507	0.0360865	0.0793873	0.506377
-1.688	-0.00941113	-0.00268105	-0.0117058	0.0353825	0.0907372	0.457193			1.97129	2.04353	1.66821	0.49941	0.423702	1.0128		0.024375	-0.0967659	-0.154473	0.033005	0.0788615	0.492281
-1.687	-0.011825	-0.00246126	-0.00275466	0.0339442	0.0904857	0.459661			1.99499	2.055	1.66132	0.494882	0.423342	0.990278		0.0252626	-0.0976341	-0.145268	0.0312704	0.0778361	0.479785
-1.686	-0.0133963	-0.00222538	0.00344797	0.0349133	0.0904511	0.460619			2.01421	2.07924	1.6289	0.490642	0.418984	1.00619		0.0211475	-0.0987365	-0.126324	0.033755	0.0766751	0.468673
-1.685	-0.0112785	-0.00216201	0.00167316	0.0366141	0.0905776	0.459811			2.03118	2.0901	1.61119	0.483743	0.41942	1.01087		0.0210668	-0.0985373	-0.108022	0.0332846	0.0756486	0.483159
-1.684	-0.00891014	-0.00286695	-0.00188378	0.035241	0.0900013	0.462292			2.04806	2.10193	1.57676	0.477301	0.41741	1.01162		0.0207441	-0.0978469	-0.110204	0.0317031	0.0748382	0.485416
-1.683	-0.00620022	-0.00213782	0.00684764	0.0331446	0.0900222	0.46108			2.06864	2.10449	1.55841	0.47193	0.419353	1.01951		0.0284901	-0.0982394	-0.118527	0.0337334	0.0747367	0.489018
-1.682	-0.00635963	-0.00209414	0.00824248	0.035771	0.0890717	0.45773			2.08795	2.12022	1.52769	0.466989	0.417524	1.00952		0.0289742	-0.0983693	-0.123836	0.0332581	0.0740817	0.49238
-1.681	-0.00749825	-0.00171186	0.00455222	0.0345562	0.0877273	0.462372			2.10239	2.13047	1.50896	0.455748	0.419624	0.997977		0.0285707	-0.0975409	-0.129527	0.03034	0.0744911	0.501373
-1.68	-0.00604081	-0.000679065	0.00968731	0.0343435	0.0877412	0.458554			2.11917	2.14456	1.49254	0.454214	0.412453	0.992379		0.0322017	-0.0973656	-0.125253	0.0288608	0.0738686	0.491078
-1.679	-0.00267049	-0.000509518	0.00871984	0.036918	0.0876181	0.45176			2.13458	2.15611	1.46768	0.446136	0.419382	0.98671		0.0313948	-0.0979566	-0.125287	0.0294297	0.0747052	0.502935
-1.678	-0.00267049	3.95727e-05	0.00671293	0.0372362	0.0879926	0.449187			2.1496	2.16272	1.4582	0.440681	0.422712	0.95448		0.0331699	-0.0981185	-0.119946	0.0287517	0.0750999	0.505174
-1.677	-0.00137246	0.00049621	0.0168027	0.036141	0.0885494	0.445468			2.16423	2.17471	1.43632	0.430243	0.423832	0.957568		0.0311527	-0.0969584	-0.114427	0.0286961	0.0756729	0.513457
-1.676	-0.00371803	0.000870843	0.0195103	0.0343249	0.0882712	0.437726			2.18209	2.18615	1.40992	0.427241	0.418339	0.950838		0.0342189	-0.0970682	-0.107205	0.0289712	0.0751405	0.508166
-1.675	-0.00670121	0.0021054	0.0194608	0.0360605	0.0886493	0.442979			2.19428	2.20513	1.38183	0.421185	0.42152	0.940192		0.0289742	-0.0975738	-0.10671	0.0310323	0.0753794	0.487206
-1.674	-0.00731606	0.00285058	0.0198543	0.0366256	0.089109	0.450028			2.20725	2.21646	1.36524	0.409593	0.42574	0.930686		0.0246171	-0.0976603	-0.117744	0.0290107	0.075456	0.474334
-1.673	-0.00474279	0.00263967	0.0199729	0.0351659	0.0885155	0.451581			2.22013	2.23402	1.35897	0.404527	0.42023	0.921608		0.0238909	-0.0960039	-0.118421	0.0300691	0.0782618	0.486263
-1.672	-0.00597249	0.00258784	0.0192569	0.0369781	0.0885655	0.456966			2.23583	2.25123	1.33595	0.401995	0.419907	0.902001		0.0232454	-0.0941822	-0.11284	0.0302244	0.0768857	0.485413
-1.671	-0.00663289	0.00230683	0.0208308	0.035704	0.0878313	0.457363			2.25027	2.26084	1.31754	0.392922	0.413153	0.904492		0.0234067	-0.0927728	-0.112499	0.0288021	0.0787462	0.48936
-1.67	-0.00843191	0.00153369	0.0207476	0.0365755	0.08693	0.449111			2.2652	2.26607	1.29685	0.384239	0.414906	0.890708		0.0197758	-0.0910235	-0.106563	0.0302566	0.0823994	0.474652
-1.669	-0.00815865	0.000962349	0.0255896	0.0351187	0.0871543	0.444745			2.27905	2.27427	1.28897	0.380786	0.409666	0.881542		0.0182427	-0.0903313	-0.10799	0.030023	0.0818627	0.45614
-1.668	-0.00597249	0.000814858	0.0233788	0.0374077	0.0867367	0.438401			2.29173	2.28779	1.27085	0.374542	0.407676	0.874942		0.0162256	-0.0889352	-0.105775	0.0289347	0.0825855	0.458484
-1.667	-0.000575429	0.00115826	0.0253095	0.0371591	0.0862682	0.442335			2.30324	2.29498	1.27094	0.362358	0.408761	0.878594		0.0188076	-0.0872935	-0.0822924	0.0280838	0.0829712	0.456851
-1.666	0.00063151	0.00191393	0.0289342	0.0357584	0.0863715	0.446073			2.31631	2.31249	1.26973	0.358237	0.415557	0.880383		0.025666	-0.0857741	-0.0802542	0.0321347	0.0822185	0.453899
-1.665	0.000973097	0.00293403	0.0361394	0.0363531	0.0870577	0.442577			2.33046	2.32281	1.26253	0.352838	0.399014	0.886706		0.025666	-0.0832472	-0.0922886	0.0326785	0.0827003	0.456047
-1.664	0.000631512	0.00340144	0.0341654	0.03697	0.0869191	0.444562			2.34011	2.34164	1.25655	0.34406	0.398831	0.873141		0.0240522	-0.082143	-0.0944625	0.0305481	0.0817303	0.452335
-1.663	0.00331866	0.00408019	0.0353415	0.0361409	0.0872832	0.446468			2.34928	2.35962	1.24767	0.335729	0.385644	0.852513		0.0259081	-0.0778219	-0.103043	0.0283088	0.0830429	0.466818
-1.662	0.00689393	0.00319706	0.0427314	0.0351169	0.086973	0.448321			2.35953	2.3786	1.22214	0.328887	0.380947	0.854043		0.0262308	-0.0751736	-0.106875	0.0258042	0.0841079	0.486191
-1.661	0.00810087	0.00301589	0.0428875	0.037072	0.0862337	0.450546			2.37026	2.38487	1.21952	0.323882	0.369912	0.846414		0.0286514	-0.0691299	-0.0990342	0.0254259	0.0878121	0.487554
-1.66	0.00734938	0.00245511	0.0496666	0.0367398	0.0856098	0.450055			2.37786	2.39629	1.22325	0.313268	0.366475	0.832753		0.0280059	-0.066292	-0.109858	0.0272816	0.0892977	0.497674
-1.659	0.00484441	0.00109486	0.0535978	0.0352374	0.0855455	0.453613			2.38869	2.41458	1.20216	0.309937	0.371907	0.840051		0.0276025	-0.062093	-0.113463	0.027929	0.0912705	0.489335
-1.658	0.00388797	0.000258966	0.0509471	0.0364259	0.0846994	0.451641			2.39533	2.4224	1.18411	0.305888	0.364995	0.82347		0.0221964	-0.0604132	-0.113867	0.0281823	0.0919896	0.483309
-1.657	0.0038652	0.000360196	0.0502543	0.0381045	0.0848448	0.451797			2.4041	2.44676	1.1856	0.29561	0.368274	0.824656		0.0178393	-0.0554653	-0.112475	0.0268896	0.0954187	0.489947
-1.656	0.0055959	-7.8158e-05	0.0447034	0.0380762	0.0842804	0.452877			2.40996	2.45713	1.18166	0.286746	0.36928	0.819028		0.0180814	-0.0532962	-0.0987426	0.027942	0.0965785	0.483608
-1.655	0.00555036	0.000228552	0.046961	0.0406237	0.0856674	0.453778			2.42088	2.46406	1.17607	0.28358	0.365495	0.810142		0.0173552	-0.0502752	-0.101366	0.0288364	0.0967358	0.471134
-1.654	0.00345529	-0.00108839	0.0438643	0.0405517	0.0851601	0.459234			2.42908	2.47264	1.15743	0.279886	0.371142	0.80245		0.0147732	-0.0466258	-0.103997	0.0306377	0.0978037	0.466443
-1.653	0.00265826	-0.00229721	0.036692	0.0403514	0.0857769	0.463507			2.43747	2.48027	1.13849	0.271355	0.363507	0.798815		0.0115457	-0.0417795	-0.103664	0.0283592	0.100422	0.469999
-1.652	0.00384243	-0.00382699	0.0393364	0.0410329	0.085718	0.467854			2.44107	2.4921	1.12519	0.268212	0.363591	0.79326		0.0111422	-0.0420092	-0.102337	0.0300393	0.100645	0.455311
-1.651	0.00746324	-0.00531747	0.0442922	0.0409906	0.0854201	0.47991			2.45073	2.50146	1.1236	0.262492	0.362083	0.788121		0.00968987	-0.0402328	-0.105669	0.0296817	0.101251	0.443577
-1.65	0.0116306	-0.00678583	0.0412343	0.042076	0.0846466	0.482415			2.4561	2.51791	1.11031	0.254392	0.358735	0.772343		0.0145311	-0.0388739	-0.113642	0.0288505	0.0997886	0.441171
-1.649	0.0118128	-0.00862628	0.0360368	0.0419399	0.0831338	0.476143			2.46224	2.53121	1.09323	0.246547	0.359896	0.762835		0.0195338	-0.0380197	-0.112049	0.0346455	0.0988008	0.449529
-1.648	0.0120177	-0.0104925	0.0347708	0.0413497	0.0818071	0.475859			2.46995	2.53777	1.0786	0.246256	0.358806	0.751743		0.0186462	-0.0355833	-0.107768	0.0349182	0.0974458	0.452139
-1.647	0.0136118	-0.0120894	0.0360026	0.0403071	0.0815629	0.480063			2.476	2.55389	1.06865	0.242308	0.36057	0.756538		0.0176779	-0.0336199	-0.110625	0.0330521	0.0974032	0.448446
-1.646	0.0156385	-0.0135561	0.0340819	0.0393642	0.080799	0.478268			2.47453	2.55602	1.04143	0.231895	0.363581	0.736464		0.0189689	-0.0332647	-0.110087	0.0293071	0.0980714	0.445488
-1.645	0.0187811	-0.0146308	0.0378332	0.0389468	0.0807217	0.478302			2.47912	2.56874	1.03918	0.227768	0.371276	0.706104		0.0196951	-0.0330128	-0.102024	0.0297989	0.0978462	0.437429
-1.644	0.0194871	-0.016001	0.0331721	0.0395624	0.0803498	0.482834			2.48458	2.57559	1.03797	0.223839	0.364966	0.707698		0.0225999	-0.0312155	-0.103568	0.0307146	0.0975196	0.438198
-1.643	0.0178247	-0.0173464	0.0320852	0.0399974	0.0799787	0.483913			2.48809	2.58424	1.02607	0.220952	0.362419	0.712715		0.0199372	-0.0296997	-0.107495	0.0303526	0.0982636	0.451066
-1.642	0.0150237	-0.0186691	0.03562	0.0392228	0.0801199	0.490573			2.48604	2.57781	1.01299	0.213896	0.368527	0.692729		0.0162256	-0.0264183	-0.107872	0.0315647	0.100189	0.452346
-1.641	0.0148643	-0.0195319	0.0337903	0.0393623	0.0803943	0.489368			2.49043	2.57351	1.00854	0.215466	0.3682	0.690119		0.0131594	-0.0240593	-0.0972707	0.0315737	0.102024	0.444379
-1.64	0.0155247	-0.0205784	0.0348676	0.0387606	0.080282	0.489584			2.49073	2.58606	0.997935	0.21015	0.371813	0.679919		0.0109809	-0.0235846	-0.0967972	0.030443	0.103208	0.433388
-1.639	0.0156613	-0.0216741	0.0339551	0.0400464	0.0798337	0.483608			2.49063	2.59941	0.983651	0.206103	0.377653	0.68692		0.00904437	-0.0229331	-0.0935813	0.0290523	0.103914	0.430183
-1.638	0.0147277	-0.0230001	0.0398683	0.0416449	0.0799577	0.487579			2.49141	2.60242	0.971932	0.205983	0.382024	0.694959		0.00831819	-0.021718	-0.0930518	0.0323417	0.105114	0.446519
-1.637	0.0144316	-0.0236816	0.0412035	0.041717	0.0799044	0.497382			2.49746	2.61685	0.965945	0.206795	0.37424	0.682612		0.00605894	-0.0207614	-0.100835	0.0336128	0.104273	0.457545
-1.636	0.011995	-0.024257	0.0425048	0.0404111	0.0803051	0.489606			2.49746	2.62108	0.952896	0.204102	0.374081	0.687494		0.00291212	-0.0209795	-0.0807531	0.0319867	0.103334	0.438151
-1.635	0.0143177	-0.0247987	0.0375615	0.0416496	0.0808492	0.489022			2.49473	2.62337	0.945644	0.203054	0.370385	0.663184		8.80581e-05	-0.0212233	-0.0786525	0.0304371	0.10398	0.429686
-1.634	0.0187811	-0.0255836	0.0361444	0.0410563	0.0807895	0.487325			2.49814	2.62875	0.944341	0.204593	0.363621	0.660901		0.00460656	-0.0211337	-0.0792043	0.0330521	0.103852	0.437314
-1.633	0.019897	-0.0265926	0.0369339	0.0427677	0.080472	0.488577			2.4997	2.63511	0.927695	0.202646	0.347156	0.655813		0.0082375	-0.0215045	-0.0838616	0.033165	0.103603	0.436418
-1.632	0.0201247	-0.0278734	0.0370817	0.0413653	0.0797489	0.494908			2.4958	2.65245	0.904833	0.200684	0.333904	0.649768		0.00920576	-0.0237219	-0.0814985	0.0350149	0.10238	0.447211
-1.631	0.020694	-0.0292337	0.0401981	0.0414228	0.0789113	0.505704			2.49502	2.66644	0.879178	0.203042	0.34393	0.636618		0.0125946	-0.0252105	-0.0845801	0.0376299	0.101062	0.440334
-1.63	0.0219465	-0.0299705	0.0371911	0.0389491	0.0789485	0.503105			2.4956	2.66594	0.876411	0.204714	0.34001	0.650972		0.0118684	-0.0221009	-0.0969679	0.0338817	0.100373	0.428141
-1.629	0.0244059	-0.0309121	0.0400189	0.0365153	0.078127	0.497481			2.48653	2.67343	0.875426	0.203992	0.347415	0.668354		0.0128367	-0.0230268	-0.0879884	0.0331722	0.0999871	0.426454
-1.628	0.0252257	-0.0314337	0.0383644	0.0365712	0.0774347	0.504872			2.48302	2.67486	0.866503	0.204028	0.346965	0.67243		0.0145311	-0.0215768	-0.0841082	0.0312664	0.101979	0.412153
-1.627	0.0255446	-0.0318866	0.038615	0.0378645	0.0782203	0.510928			2.48165	2.68006	0.845385	0.206574	0.340145	0.665436		0.0188076	-0.0206317	-0.0709318	0.0324747	0.1029	0.414908
-1.626	0.0237683	-0.0322739	0.0385235	0.0372759	0.0784846	0.502413			2.47922	2.69965	0.830314	0.211589	0.340594	0.667659		0.0147732	-0.0208574	-0.0622147	0.0336286	0.102658	0.414458
-1.625	0.0204435	-0.0321251	0.0292745	0.0345338	0.0786135	0.499614			2.47141	2.69855	0.813288	0.210541	0.33603	0.679663		0.0109002	-0.0205311	-0.055947	0.0324617	0.103582	0.416964
-1.624	0.0213089	-0.0321823	0.020939	0.0348503	0.0789219	0.497517			2.46497	2.71036	0.808558	0.215678	0.341335	0.678405		0.00783406	-0.0208053	-0.0687719	0.0322731	0.101862	0.412417
-1.623	0.0215366	-0.0328226	0.0217968	0.0347638	0.0790231	0.49681			2.46107	2.70919	0.801845	0.219665	0.344212	0.685561		0.00710788	-0.0203201	-0.0836566	0.0284845	0.0989314	0.414035
-1.622	0.0205802	-0.033301	0.0180588	0.0339746	0.0790917	0.492276			2.456	2.70875	0.79167	0.222293	0.342634	0.647801		0.00339625	-0.0191899	-0.0863652	0.0295153	0.0976869	0.413372
-1.621	0.0194871	-0.0335073	0.0165162	0.0372004	0.0791742	0.490222			2.45024	2.70966	0.774731	0.226022	0.34176	0.640005		0.00444519	-0.0190244	-0.0786576	0.0305131	0.0972898	0.42057
-1.62	0.0176425	-0.0332327	0.0154524	0.0368595	0.0788851	0.492311			2.44907	2.71968	0.744908	0.230865	0.351484	0.647257		0.00444518	-0.0170735	-0.087943	0.0283543	0.09728	0.424439
-1.619	0.0178702	-0.0333413	0.0236639	0.0344095	0.0786269	0.495029			2.44147	2.72304	0.760029	0.234384	0.357811	0.64365		0.000894933	-0.0154359	-0.0911888	0.0277359	0.0995223	0.423202
-1.618	0.0196465	-0.0333316	0.0252176	0.0342286	0.0792207	0.494758			2.43337	2.73494	0.755616	0.236582	0.363618	0.645736		0.00210524	-0.016055	-0.0921549	0.0278121	0.0992626	0.42195
-1.617	0.0235861	-0.0332297	0.0235573	0.0357623	0.0797134	0.493937			2.4282	2.74201	0.735753	0.242057	0.361171	0.646601		0.00452587	-0.015709	-0.0899738	0.028431	0.0994462	0.417944
-1.616	0.0232673	-0.0326706	0.0155629	0.0362869	0.0799149	0.499944			2.424	2.75159	0.718819	0.247073	0.354969	0.642994		0.0121105	-0.0156767	-0.0889599	0.0311009	0.0985313	0.420746
-1.615	0.0240871	-0.0330828	0.015459	0.0362826	0.0791216	0.495388			2.41435	2.75342	0.711965	0.249259	0.344418	0.645107		0.0105774	-0.0156155	-0.0962851	0.0325689	0.0977935	0.427387
-1.614	0.0233356	-0.0324517	0.0192232	0.0347847	0.0791578	0.497653			2.40596	2.75193	0.698698	0.255422	0.346463	0.635846		0.0134015	-0.0145011	-0.0909583	0.0335765	0.0958398	0.435577
-1.613	0.0250436	-0.0326563	0.0185855	0.0347952	0.0794054	0.489546			2.39757	2.75266	0.679591	0.261579	0.347479	0.628098		0.0154994	-0.0143257	-0.0905835	0.0311561	0.0956666	0.429086
-1.612	0.0263416	-0.0324652	0.0255745	0.0324464	0.0794265	0.487171			2.38967	2.76038	0.657718	0.26559	0.338941	0.627406		0.0167097	-0.0150402	-0.0873023	0.0318585	0.0951544	0.415343
-1.611	0.0280951	-0.0323736	0.0229502	0.032432	0.0795334	0.482226			2.3764	2.76485	0.636068	0.268331	0.332007	0.614229		0.0193724	-0.0149271	-0.0899453	0.0323243	0.0936694	0.410727
-1.61	0.0265238	-0.0309358	0.0260124	0.0334872	0.0808994	0.48245			2.3683	2.76973	0.613432	0.276669	0.323016	0.610755		0.0216316	-0.0149846	-0.088036	0.0313253	0.0919624	0.405482
-1.609	0.023996	-0.0301851	0.0294617	0.0331852	0.0818754	0.485616			2.35933	2.76864	0.610865	0.280457	0.321502	0.611776		0.0195338	-0.0158865	-0.0826283	0.0317841	0.0908969	0.417868
-1.608	0.0213089	-0.029537	0.0324143	0.0320602	0.0825585	0.483249			2.34714	2.7707	0.589624	0.284026	0.316705	0.6113		0.0144504	-0.0173346	-0.0851666	0.0316981	0.0898633	0.426718
-1.607	0.0207396	-0.02887	0.0342269	0.0326895	0.0833801	0.489463			2.32977	2.76361	0.594072	0.290264	0.315903	0.600259		0.0132401	-0.017363	-0.0814029	0.033633	0.0881794	0.428206
-1.606	0.0214683	-0.0274356	0.0323226	0.0325475	0.0841593	0.47853			2.3246	2.76979	0.591155	0.29745	0.316027	0.58425		0.0141277	-0.0189479	-0.0688708	0.0299076	0.0875898	0.433626
-1.605	0.0193732	-0.0270927	0.0264371	0.0318494	0.0842014	0.481865			2.31339	2.78343	0.586207	0.301306	0.318882	0.567753		0.0131594	-0.0183943	-0.0666532	0.0301729	0.0878695	0.440614
-1.604	0.0178019	-0.0265193	0.0220555	0.0320494	0.0848052	0.482334			2.30158	2.78334	0.590082	0.307321	0.313564	0.571222		0.0125946	-0.0188119	-0.0612669	0.0291553	0.0887139	0.457175
-1.603	0.0156841	-0.0246109	0.0289037	0.0337363	0.0862662	0.484951			2.29163	2.79092	0.572694	0.311865	0.330072	0.572614		0.0110616	-0.0185372	-0.0478653	0.0292456	0.089518	0.463
-1.602	0.014887	-0.0236266	0.0276975	0.0330125	0.0870321	0.485075			2.27866	2.80322	0.55493	0.315816	0.344346	0.574881		0.00912505	-0.0180143	-0.0344672	0.0292057	0.0905986	0.454227
-1.601	0.0185534	-0.0211572	0.0230531	0.0333838	0.0883958	0.488505			2.26627	2.80957	0.538224	0.322493	0.351069	0.57745		0.0133208	-0.0154548	-0.00680149	0.0302695	0.0907903	0.45154
-1.6	0.0205802	-0.0187688	0.0248384	0.0333176	0.0902359	0.491205			2.25544	2.81105	0.527042	0.330885	0.349446	0.571779		0.015338	-0.0164565	-0.0148215	0.033136	0.0896362	0.447304
-1.599	0.0212633	-0.0168243	0.0249641	0.0344148	0.0906854	0.491765			2.24461	2.82077	0.514202	0.334185	0.339219	0.574036		0.0217123	-0.0167273	-0.0139065	0.0318233	0.091169	0.458137
-1.598	0.019692	-0.0148722	0.023508	0.0350755	0.0913449	0.485174			2.23125	2.82987	0.511022	0.340679	0.356063	0.557319		0.023084	-0.0154065	-0.00736351	0.031122	0.0921783	0.472625
-1.597	0.0182574	-0.0136539	0.0231503	0.0357336	0.0922812	0.484474			2.2174	2.81815	0.511376	0.343394	0.356694	0.566411		0.0224385	-0.0150775	-0.013585	0.0355098	0.0918323	0.472326
-1.596	0.0206257	-0.0114124	0.0303814	0.0377566	0.0923627	0.487164			2.20013	2.81736	0.49846	0.351716	0.358766	0.561588		0.025666	-0.0146717	0.0170582	0.0364918	0.0930797	0.477822
-1.595	0.0213317	-0.00873738	0.0263702	0.0375387	0.0920692	0.49009			2.18755	2.81303	0.489642	0.35555	0.360051	0.558902		0.0271991	-0.0150995	0.00965785	0.0343917	0.0937788	0.478871
-1.594	0.0222881	-0.00655378	0.0223111	0.0359776	0.0925304	0.489565			2.17214	2.8222	0.492453	0.36133	0.365094	0.556171		0.0313141	-0.0145339	-0.00221084	0.0357838	0.0949671	0.49088
-1.593	0.0185306	-0.00270282	0.0189919	0.0369838	0.0942564	0.487006			2.15838	2.83791	0.489838	0.367827	0.364734	0.560746		0.0319596	-0.0150241	-0.000292006	0.0343426	0.094038	0.493937
-1.592	0.014796	-8.33472e-05	0.0172711	0.037903	0.0940597	0.488548			2.14073	2.83109	0.482555	0.373455	0.366798	0.55139		0.0304266	-0.0122021	-0.0125664	0.0330792	0.0993684	0.479841
-1.591	0.0135663	0.00120556	0.0227768	0.0380254	0.0950812	0.487072			2.12639	2.83139	0.477922	0.375062	0.355973	0.563804		0.0246978	-0.0126966	-0.01001	0.0360666	0.0990005	0.480059
-1.59	0.0130653	0.00447572	0.0167686	0.0377814	0.0956974	0.487896			2.10649	2.82538	0.460204	0.383349	0.35659	0.55814		0.0236488	-0.0116251	-0.00443153	0.0399601	0.102668	0.500903
-1.589	0.012086	0.00821187	0.0157993	0.0372762	0.0966979	0.479964			2.09059	2.82571	0.457473	0.390192	0.35061	0.54437		0.0258274	-0.0103332	-0.0136415	0.0371823	0.104833	0.495322
-1.588	0.0101504	0.00959015	0.0166118	0.0352369	0.0961975	0.489033			2.07839	2.82349	0.446826	0.393781	0.344576	0.542907		0.0263922	-0.00991215	0.00102121	0.0350742	0.105806	0.489539
-1.587	0.00741769	0.0119838	0.0122258	0.0340647	0.0974672	0.486574			2.06425	2.81379	0.445689	0.397676	0.341825	0.536895		0.0246171	-0.00814558	-0.00585422	0.0365082	0.10811	0.497472
-1.586	0.00564144	0.0153727	0.017616	0.0363988	0.0993489	0.481939			2.04542	2.81496	0.444886	0.401774	0.34114	0.540397		0.0216316	-0.00688566	-0.0192404	0.0370133	0.107315	0.48621
-1.585	0.00627907	0.0159816	0.0182163	0.0369153	0.0991328	0.483515			2.02991	2.82794	0.440302	0.40588	0.36245	0.552189		0.0209861	-0.00634038	-0.0189829	0.0364757	0.109349	0.4882
-1.584	0.0082375	0.016913	0.0162753	0.0373692	0.0988253	0.479597			2.01391	2.83248	0.419901	0.413963	0.359524	0.530334		0.0223578	-0.0051456	-0.0285618	0.04116	0.110238	0.487851
-1.583	0.0107425	0.0180709	0.0173806	0.0366221	0.0994995	0.484694			1.99626	2.829	0.415111	0.416748	0.348168	0.522344		0.0281673	-0.00395816	-0.0430909	0.0424556	0.110309	0.48984
-1.582	0.00926226	0.0190808	0.0224138	0.037261	0.099788	0.477812			1.98046	2.83918	0.408215	0.424649	0.344158	0.520894		0.0325244	-0.00362905	-0.0386284	0.0422581	0.109724	0.483495
-1.581	0.00869295	0.020618	0.0248391	0.0371741	0.0985102	0.474934			1.96621	2.83931	0.410806	0.42545	0.341212	0.528814		0.0346223	-0.000281845	-0.0386391	0.0414958	0.120301	0.496747
-1.58	0.00771374	0.0219312	0.0252808	0.0407772	0.098629	0.468774			1.94563	2.83721	0.403397	0.430407	0.349998	0.547201		0.0347837	6.7525e-05	-0.0532466	0.0463337	0.127503	0.486214
-1.579	0.00944445	0.0226741	0.0211605	0.0413411	0.0980122	0.463541			1.92641	2.84882	0.383848	0.435883	0.343648	0.553509		0.035752	0.000293439	-0.0578192	0.0473862	0.131494	0.48482
-1.578	0.0108563	0.0240602	0.0181372	0.040934	0.0983768	0.463427			1.90573	2.84389	0.36811	0.440268	0.343707	0.550221		0.0394636	0.000479089	-0.068585	0.0466856	0.134728	0.482283
-1.577	0.00958108	0.0245688	0.0280333	0.040357	0.0988005	0.461958			1.89003	2.8475	0.360567	0.446183	0.347891	0.548236		0.0407546	0.00471397	-0.0778531	0.0489411	0.150511	0.485466
-1.576	0.00559591	0.0257492	0.0357324	0.0402871	0.0979866	0.462069			1.87159	2.84943	0.358483	0.449898	0.343734	0.54331		0.0399477	0.00773128	-0.0853977	0.0477945	0.161091	0.490722
-1.575	0.00227113	0.0268946	0.0319707	0.0396814	0.0973521	0.457774			1.85218	2.8386	0.34407	0.455107	0.341034	0.541317		0.0374464	0.0101455	-0.0939073	0.0469148	0.173964	0.476929
-1.574	0.00156519	0.0290185	0.0306345	0.0404291	0.0975261	0.459893			1.83248	2.83406	0.345391	0.456499	0.337715	0.551409		0.0357519	0.0102949	-0.092478	0.051428	0.176455	0.47807
-1.573	0.000950331	0.0295871	0.0266833	0.0407113	0.0972289	0.45379			1.81121	2.83137	0.32639	0.463712	0.351217	0.55466		0.034703	0.0119311	-0.0932856	0.057191	0.179421	0.483868
-1.572	0.000403792	0.030277	0.0259012	0.0380184	0.0973656	0.45907			1.79033	2.82148	0.314172	0.468107	0.345073	0.557671		0.0335734	0.0121999	-0.0893396	0.0570085	0.18132	0.487413
-1.571	-0.00194178	0.0306836	0.0334543	0.0355563	0.0973545	0.453503			1.77502	2.81576	0.310966	0.469925	0.349586	0.552833		0.0344609	0.0129554	-0.0762204	0.0556541	0.187308	0.491301
-1.57	-0.00476556	0.0319515	0.0363918	0.0350618	0.0974428	0.446934			1.75912	2.80717	0.308538	0.473747	0.349018	0.555508		0.0322017	0.0118899	-0.0783496	0.060194	0.189141	0.496096
-1.569	-0.00581309	0.0317081	0.039149	0.0365745	0.0963714	0.452061			1.73727	2.80143	0.328464	0.477676	0.348353	0.582946		0.0307493	0.0148945	-0.0869467	0.0637272	0.202258	0.500849
-1.568	-0.00428734	0.0319612	0.0440784	0.0365039	0.0954098	0.453146			1.71747	2.80969	0.329093	0.479285	0.34431	0.582321		0.0306686	0.0160997	-0.092485	0.0643852	0.209079	0.502737
-1.567	-0.00182791	0.0322816	0.0348868	0.0353467	0.0956063	0.45554			1.69893	2.81451	0.318072	0.484232	0.356617	0.587235		0.0356713	0.0156642	-0.0952266	0.0706672	0.21052	0.506291
-1.566	-7.44316e-05	0.0315951	0.0432132	0.0367624	0.0948904	0.449986			1.67933	2.8046	0.313489	0.48828	0.366092	0.579875		0.035994	0.015345	-0.101029	0.0744576	0.209233	0.500253
-1.565	-0.00160019	0.032481	0.0376118	0.0349568	0.0946296	0.45247			1.65923	2.80548	0.315337	0.493028	0.369748	0.561594		0.0413194	0.0150493	-0.119238	0.0745351	0.214755	0.494308
-1.564	-0.000962562	0.0314518	0.0396932	0.0362891	0.093791	0.448275			1.64031	2.80521	0.299343	0.494943	0.368172	0.559772		0.0426911	0.0150434	-0.134921	0.0754795	0.215073	0.493251
-1.563	-0.00128137	0.0313438	0.0402031	0.0390791	0.0930034	0.451445			1.62109	2.80494	0.294377	0.496171	0.375691	0.54947		0.0428525	0.0188022	-0.117998	0.080911	0.218036	0.496292
-1.562	0.000882011	0.0313881	0.0375293	0.0405132	0.0922002	0.454041			1.59592	2.79504	0.29122	0.501622	0.369678	0.556037		0.0451117	0.0201371	-0.109002	0.0840879	0.22057	0.498538
-1.561	0.00299984	0.0308549	0.0384568	0.0375957	0.0916013	0.462751			1.57407	2.77973	0.270652	0.505618	0.369156	0.550133		0.0485813	0.0207161	-0.104535	0.0844268	0.218682	0.487993
-1.56	0.00117805	0.0302728	0.0317022	0.0375788	0.0912506	0.466607			1.55651	2.77321	0.266978	0.508347	0.362026	0.545556		0.0497109	0.0214706	-0.10615	0.0878142	0.217595	0.484234
-1.559	-0.00319425	0.0306102	0.0308577	0.038289	0.0905374	0.472524			1.53378	2.77234	0.263768	0.509865	0.356156	0.532077		0.0485006	0.0233755	-0.0985626	0.0911808	0.219141	0.476424
-1.558	-0.0049705	0.0306841	0.0355339	0.0380345	0.0903935	0.468534			1.51086	2.76987	0.271648	0.515435	0.350261	0.520019		0.0443855	0.0279186	-0.108863	0.09196	0.227774	0.469419
-1.557	-0.00449229	0.0301033	0.0275343	0.0366839	0.0895168	0.466401			1.49135	2.77234	0.258954	0.516552	0.35696	0.522823		0.0426104	0.0332623	-0.0952773	0.098143	0.235638	0.471878
-1.556	-0.00428733	0.0310456	0.0329355	0.0376082	0.0897232	0.46578			1.46784	2.76407	0.247573	0.520242	0.354645	0.521464		0.0433366	0.0358568	-0.0943807	0.104762	0.241687	0.458993
-1.555	-0.00508437	0.0311513	0.0317827	0.0358737	0.089194	0.471881			1.44443	2.75798	0.271505	0.522396	0.36103	0.536039		0.0434173	0.0377515	-0.0850465	0.10609	0.240777	0.452453
-1.554	-0.00651903	0.0315027	0.0253236	0.0340591	0.0888325	0.471921			1.4258	2.75454	0.269322	0.52631	0.359666	0.533978		0.0429331	0.0440893	-0.0914024	0.110067	0.2512	0.447949
-1.553	-0.00961608	0.0319042	0.0223865	0.0331916	0.0881179	0.469701			1.40717	2.73942	0.28053	0.526919	0.354847	0.534174		0.0407546	0.0467441	-0.105904	0.111562	0.256128	0.451434
-1.552	-0.00790815	0.0322818	0.0220886	0.0353006	0.0874097	0.468931			1.386	2.73156	0.279071	0.52795	0.35129	0.531592		0.0409159	0.0531103	-0.096264	0.118628	0.257747	0.450785
-1.551	-0.00574477	0.0328616	0.0215532	0.0346061	0.0879334	0.478928			1.35898	2.72542	0.280978	0.53296	0.346212	0.531079		0.0405932	0.0560509	-0.0943372	0.124199	0.264119	0.455231
-1.55	-0.00160019	0.033755	0.020444	0.0332083	0.0880929	0.475934			1.33947	2.71447	0.288522	0.536043	0.350911	0.529439		0.0464834	0.0580364	-0.0996617	0.131553	0.267069	0.462687
-1.549	-0.000962562	0.0343771	0.0324892	0.0337648	0.0882311	0.474032			1.32064	2.70865	0.275076	0.537715	0.361051	0.526479		0.0485813	0.0605546	-0.0997489	0.133893	0.270044	0.459449
-1.548	-0.00121306	0.0353758	0.0351111	0.0353586	0.0882826	0.481076			1.29713	2.70066	0.261797	0.540607	0.358355	0.53086		0.0536646	0.0616257	-0.101565	0.136871	0.270717	0.459664
-1.547	-0.00182791	0.0362948	0.0282314	0.0333777	0.0883813	0.47857			1.27197	2.68676	0.254935	0.543996	0.354851	0.53121		0.0551169	0.0646844	-0.0994303	0.139816	0.273339	0.447817
-1.546	0.0025444	0.0369749	0.0277863	0.0356683	0.0881535	0.477433			1.25275	2.67818	0.253991	0.545647	0.348122	0.545139		0.0548749	0.0745631	-0.113731	0.143219	0.285397	0.451845
-1.545	0.00265826	0.0377333	0.0233649	0.0367035	0.0883815	0.484615			1.22631	2.6638	0.246536	0.548136	0.345096	0.529594		0.0587479	0.0787063	-0.111078	0.149262	0.288356	0.461597
-1.544	0.0053454	0.0384283	0.0116611	0.0357281	0.0880247	0.480621			1.20124	2.65844	0.221995	0.554091	0.345828	0.526044		0.0620561	0.0830865	-0.115543	0.157034	0.295512	0.458231
-1.543	0.00227112	0.0387121	0.00855467	0.0333319	0.0880053	0.486787			1.18047	2.64389	0.220032	0.554762	0.343492	0.516555		0.064154	0.0876969	-0.109509	0.155993	0.30031	0.455887
-1.542	-0.000302159	0.0388353	0.00422275	0.0367669	0.0883058	0.486758			1.15589	2.62895	0.224617	0.556308	0.348518	0.524398		0.0606037	0.0966327	-0.11271	0.1593	0.317904	0.444503
-1.541	-0.00123583	0.0391638	0.0112121	0.0368399	0.0873994	0.48497			1.13043	2.62389	0.220825	0.559039	0.346515	0.533336		0.0580217	0.106905	-0.0988936	0.164258	0.340238	0.437976
-1.54	0.0016335	0.0399114	0.00380192	0.0356741	0.0872823	0.486722			1.10555	2.62727	0.209033	0.562782	0.352275	0.541008		0.057941	0.110951	-0.097036	0.171164	0.348708	0.423276
-1.539	0.00129191	0.0396387	0.010693	0.0365956	0.0862192	0.477795			1.08399	2.6254	0.208142	0.566991	0.356879	0.556081		0.0625402	0.117298	-0.0886867	0.174793	0.352098	0.420629
-1.538	0.000449336	0.0412415	0.0126894	0.037744	0.0862053	0.477772			1.0598	2.61719	0.201503	0.56686	0.357417	0.548991		0.0599582	0.123912	-0.0782425	0.180512	0.358879	0.423692
-1.537	-0.000825922	0.040973	0.0175108	0.0373294	0.0851834	0.483437			1.03854	2.60191	0.175331	0.572045	0.361039	0.54386		0.0608458	0.129244	-0.0860877	0.186671	0.362325	0.41463
-1.536	-0.0010081	0.0424589	0.0234674	0.0372043	0.0849249	0.488799			1.01249	2.59236	0.172201	0.5733	0.358069	0.522737		0.0600389	0.136094	-0.0981717	0.191136	0.368472	0.400682
-1.535	0.000403787	0.0429872	0.0240582	0.0376751	0.0846295	0.48226			0.991615	2.57627	0.177773	0.575328	0.352969	0.507416		0.0587479	0.146483	-0.105444	0.195615	0.375813	0.396055
-1.534	0.00461669	0.0431539	0.0241591	0.0387446	0.0843129	0.482021			0.963131	2.56494	0.177689	0.579511	0.349342	0.502409		0.0646381	0.154715	-0.106762	0.205273	0.386117	0.401413
-1.533	0.00771374	0.0430663	0.027166	0.0381311	0.0837572	0.479569			0.941573	2.5552	0.159368	0.584676	0.355918	0.499462		0.0698021	0.162743	-0.111993	0.216808	0.394956	0.400955
-1.532	0.00923949	0.0434716	0.0264813	0.0382096	0.0850885	0.474538			0.917284	2.54979	0.150013	0.585704	0.358354	0.493047		0.0775481	0.168573	-0.108792	0.217273	0.39924	0.410568
-1.531	0.00828305	0.0433382	0.0319817	0.0387813	0.0857316	0.479202			0.895043	2.54	0.129624	0.590273	0.353449	0.493947		0.0765798	0.172837	-0.118986	0.221867	0.400681	0.41876
-1.53	0.00901177	0.0437498	0.0246411	0.036426	0.0861506	0.478834			0.866266	2.5313	0.130114	0.591407	0.355467	0.489398		0.0804528	0.179966	-0.12154	0.226982	0.408275	0.400516
-1.529	0.0120633	0.0424145	0.024298	0.0362487	0.0861817	0.475514			0.842855	2.52452	0.123903	0.597725	0.359365	0.501696		0.0852134	0.187002	-0.108327	0.232564	0.414698	0.4062
-1.528	0.0152514	0.0418832	0.0165874	0.036849	0.0859363	0.476896			0.815542	2.51282	0.111665	0.595017	0.360002	0.489678		0.088683	0.190282	-0.111034	0.239077	0.417163	0.411224
-1.527	0.0148871	0.042089	0.0170913	0.0389905	0.0863021	0.476211			0.786667	2.50308	0.122887	0.599931	0.361526	0.47282		0.0908615	0.194849	-0.0942862	0.245913	0.423399	0.41532
-1.526	0.0129742	0.0416936	0.0219614	0.0375631	0.0865416	0.477866			0.76111	2.48832	0.121984	0.604895	0.360959	0.455695		0.0921525	0.198514	-0.10065	0.252365	0.427227	0.412507
-1.525	0.0107197	0.0409875	0.0170378	0.0378016	0.0877488	0.48346			0.735748	2.47766	0.12247	0.607243	0.358943	0.440674		0.093847	0.203477	-0.108949	0.249621	0.431524	0.407653
-1.524	0.0107425	0.0392457	0.0214892	0.0382264	0.0889252	0.488319			0.70902	2.46224	0.129177	0.606673	0.360133	0.426671		0.0909422	0.209366	-0.114336	0.258383	0.444283	0.417691
-1.523	0.0121771	0.0374886	0.0163876	0.0392916	0.0891949	0.480635			0.680243	2.45055	0.121131	0.613846	0.365291	0.433707		0.0915877	0.210972	-0.114404	0.269552	0.447382	0.419075
-1.522	0.0134296	0.0362079	0.0185315	0.0408572	0.0884681	0.481053			0.655076	2.44001	0.120471	0.616189	0.368233	0.431484		0.0960255	0.217275	-0.112537	0.275388	0.454886	0.437234
-1.521	0.012587	0.0349447	0.0137137	0.0419769	0.0886542	0.483153			0.629421	2.42598	0.0982342	0.616032	0.363691	0.433712		0.0945732	0.223285	-0.105929	0.281634	0.46235	0.431451
-1.52	0.010492	0.0330472	0.0134546	0.0435502	0.088118	0.483636			0.60279	2.41238	0.0899334	0.618602	0.366287	0.443576		0.0994144	0.229072	-0.116973	0.288689	0.464725	0.43942
-1.519	0.0100593	0.0319127	0.0204097	0.0425315	0.0883047	0.499512			0.578501	2.39819	0.0998011	0.624599	0.367596	0.464937		0.0985268	0.232333	-0.100945	0.294471	0.462748	0.458332
-1.518	0.0134069	0.0306308	0.0169763	0.0422528	0.0875837	0.493881			0.55187	2.38661	0.0842447	0.626934	0.366452	0.474594		0.102965	0.236578	-0.0966599	0.302141	0.462809	0.460806
-1.517	0.0182574	0.0292871	0.0165503	0.0437838	0.0871213	0.487027			0.523484	2.37368	0.0630731	0.628754	0.365556	0.486516		0.107725	0.243525	-0.0716418	0.314395	0.47285	0.465924
-1.516	0.0199881	0.0281526	0.0147333	0.0446198	0.0870014	0.489668			0.499195	2.35606	0.0685243	0.634102	0.359289	0.483004		0.116036	0.25004	-0.0811366	0.324884	0.476695	0.470353
-1.515	0.0195326	0.0267273	0.0206326	0.0436221	0.0881671	0.488452			0.470418	2.34267	0.0767135	0.637102	0.35928	0.485663		0.123459	0.254855	-0.0756925	0.326762	0.479786	0.470137
-1.514	0.019191	0.026043	0.0274812	0.0431887	0.089559	0.491689			0.446519	2.32675	0.079091	0.638137	0.357473	0.477029		0.125799	0.264524	-0.0735327	0.330291	0.491917	0.465174
-1.513	0.0216049	0.0243982	0.0196506	0.0402487	0.0886446	0.486522			0.414133	2.30933	0.070388	0.640272	0.357762	0.491996		0.132254	0.280805	-0.0869128	0.340789	0.500944	0.461764
-1.512	0.0249525	0.0235839	0.0152671	0.0400075	0.088406	0.48643			0.383113	2.29496	0.0776681	0.644953	0.362489	0.478043		0.137822	0.288919	-0.0880541	0.347418	0.507682	0.457662
-1.511	0.0268198	0.0228697	0.0135925	0.0400618	0.0890615	0.492242			0.35658	2.27924	0.0674569	0.645986	0.364242	0.473495		0.145164	0.29625	-0.0772106	0.355036	0.514972	0.452786
-1.51	0.0258634	0.0220731	0.0134326	0.0410428	0.0899592	0.490261			0.327218	2.25969	0.0686941	0.646044	0.363801	0.474463		0.147504	0.301439	-0.0808748	0.363097	0.520665	0.475132
-1.509	0.0226069	0.0205967	0.0145331	0.0403511	0.0895977	0.483029			0.295808	2.2402	0.0903197	0.648421	0.362136	0.472997		0.149844	0.311211	-0.0784877	0.369297	0.525557	0.478214
-1.508	0.0213772	0.0200382	0.00642665	0.0409851	0.0910569	0.480089			0.267129	2.22766	0.0860305	0.651119	0.364001	0.487003		0.15057	0.320958	-0.0739315	0.37023	0.538547	0.46868
-1.507	0.0211039	0.0196001	0.00774628	0.0397301	0.0913147	0.48552			0.23845	2.21402	0.0723188	0.653477	0.36438	0.49968		0.153798	0.335146	-0.0704296	0.379896	0.553834	0.476604
-1.506	0.0229713	0.0193631	0.0168752	0.0392454	0.0915399	0.483032			0.206259	2.20099	0.0717482	0.655412	0.367842	0.500856		0.155976	0.343906	-0.0787179	0.393664	0.560946	0.474781
-1.505	0.0230851	0.0188712	0.0231385	0.0431367	0.0942369	0.489506			0.174751	2.18849	0.0832693	0.657641	0.3725	0.505799		0.161463	0.349385	-0.086659	0.400266	0.569744	0.465731
-1.504	0.0203524	0.0176893	0.0173844	0.0441717	0.0949132	0.486639			0.152608	2.17079	0.072767	0.655592	0.369743	0.512581		0.167999	0.354387	-0.0985527	0.406675	0.57046	0.465457
-1.503	0.0186901	0.0169215	0.0104779	0.0433441	0.0939786	0.482654			0.123051	2.15131	0.0563404	0.660734	0.368114	0.515985		0.166546	0.36559	-0.0952742	0.412313	0.580905	0.452673
-1.502	0.0201475	0.0166832	0.0113047	0.0438869	0.0961278	0.483669			0.0913481	2.12858	0.070908	0.660268	0.365384	0.505168		0.173405	0.3768	-0.0850535	0.422299	0.60431	0.449125
-1.501	0.0242693	0.0168428	0.00769132	0.0444637	0.0980541	0.486665			0.0618887	2.11123	0.0596485	0.662372	0.363701	0.491072		0.180909	0.384967	-0.0769957	0.433022	0.610759	0.449669
-1.5	0.0272753	0.0163077	0.00801847	0.0444632	0.0986286	0.488817			0.0349656	2.09106	0.0547804	0.662295	0.362171	0.490804		0.190753	0.391641	-0.0838791	0.443128	0.616296	0.443773
-1.499	0.0277763	0.0160574	0.00474469	0.0456566	0.0989785	0.486583			0.00404297	2.07112	0.0617129	0.663194	0.35903	0.491463		0.200516	0.401678	-0.0823708	0.453679	0.620373	0.443764
-1.498	0.027207	0.0151709	0.00642996	0.0448552	0.0995603	0.484064			-0.0261968	2.05191	0.0578284	0.666643	0.354919	0.481969		0.209553	0.414482	-0.0560441	0.457146	0.627621	0.439118
-1.497	0.0275258	0.0148118	0.00900208	0.0444136	0.0998201	0.483103			-0.0546807	2.03462	0.0622864	0.66571	0.351726	0.462143		0.215282	0.421719	-0.0704151	0.463474	0.635153	0.445034
-1.496	0.0300763	0.0149606	-0.000431833	0.0413038	0.101102	0.481097			-0.0869689	2.02261	0.0625295	0.665472	0.352686	0.475076		0.222463	0.431833	-0.0806173	0.471014	0.643192	0.447148
-1.495	0.0331278	0.0150304	-0.00283644	0.041253	0.102584	0.476952			-0.121793	2.0124	0.0730576	0.666346	0.356649	0.485858		0.231661	0.443649	-0.0695607	0.479994	0.652044	0.452229
-1.494	0.0336971	0.0153708	-0.00241875	0.0434542	0.10469	0.483936			-0.150277	1.99624	0.0597286	0.667045	0.356202	0.477221		0.241747	0.448375	-0.0672124	0.490617	0.655442	0.452841
-1.493	0.0324674	0.0152537	-0.0109524	0.0427552	0.105362	0.487169			-0.180029	1.98078	0.0451377	0.665103	0.353578	0.480875		0.247476	0.455172	-0.0695553	0.496041	0.658314	0.450283
-1.492	0.0284594	0.0149215	-0.0130654	0.0417818	0.106151	0.487915			-0.213098	1.96741	0.0461107	0.663888	0.352592	0.493913		0.251188	0.469156	-0.0834124	0.502959	0.686539	0.440669
-1.491	0.0286644	0.0154127	-0.0118944	0.0437191	0.107655	0.4821			-0.247923	1.95291	0.0547753	0.665134	0.350531	0.487758		0.254819	0.487541	-0.0893407	0.508639	0.701513	0.452051
-1.49	0.0286188	0.0168081	-0.0179316	0.0435316	0.109633	0.487354			-0.277675	1.93916	0.0620524	0.663758	0.348501	0.487658		0.264178	0.504315	-0.098127	0.518447	0.707199	0.453217
-1.489	0.0296436	0.017751	-0.0137238	0.0422948	0.113869	0.491314			-0.309085	1.92468	0.0457098	0.661016	0.349018	0.495418		0.27023	0.517756	-0.109817	0.528293	0.713538	0.449478
-1.488	0.0293703	0.0181781	-0.0200313	0.0459377	0.116554	0.487111			-0.340398	1.90484	0.0346895	0.663354	0.34752	0.487109		0.276766	0.525054	-0.106053	0.538836	0.713606	0.440903
-1.487	0.0267515	0.020468	-0.0164811	0.0467221	0.120601	0.494366			-0.368589	1.88524	0.0414532	0.659697	0.343828	0.475638		0.285076	0.537957	-0.120739	0.545724	0.717592	0.438331
-1.486	0.0253624	0.0215835	-0.0197436	0.0474447	0.121058	0.502627			-0.39561	1.8668	0.0499295	0.658709	0.337793	0.454618		0.289998	0.549199	-0.1328	0.549241	0.724312	0.444853
-1.485	0.0275485	0.0219133	-0.0202536	0.0483966	0.121943	0.508192			-0.428873	1.85125	0.0347219	0.655934	0.338764	0.456189		0.29839	0.559041	-0.120016	0.561281	0.736498	0.440035
-1.484	0.0310783	0.0233043	-0.0239173	0.0512756	0.124678	0.504451			-0.459698	1.83627	0.0482535	0.65618	0.339134	0.465941		0.312026	0.566157	-0.125286	0.572857	0.743264	0.440145
-1.483	0.0344714	0.0250619	-0.0249443	0.0522626	0.127153	0.504202			-0.485158	1.81806	0.0425672	0.656265	0.33508	0.471476		0.325178	0.574465	-0.116484	0.583651	0.74386	0.443849
-1.482	0.0336743	0.0280544	-0.0267168	0.0528561	0.12985	0.503462			-0.51891	1.79991	0.0325704	0.652314	0.33322	0.452094		0.337685	0.590319	-0.12249	0.589379	0.756022	0.435332
-1.481	0.0331505	0.0303499	-0.0252326	0.0555753	0.133219	0.499907			-0.55071	1.78127	0.0299093	0.651207	0.331599	0.462769		0.347206	0.602548	-0.137217	0.596752	0.755291	0.43791
-1.48	0.0343347	0.0320389	-0.0272659	0.0565638	0.135337	0.509182			-0.581048	1.76459	0.0501707	0.648037	0.331493	0.475705		0.359793	0.612527	-0.12338	0.602266	0.757769	0.447212
-1.479	0.0370219	0.033325	-0.0249705	0.0558104	0.138508	0.504214			-0.61119	1.75145	0.0393165	0.645951	0.332179	0.478502		0.368669	0.623629	-0.14003	0.610148	0.759038	0.441104
-1.478	0.0389575	0.0350757	-0.0210889	0.05938	0.143698	0.496496			-0.644258	1.73491	0.0353901	0.642451	0.330891	0.475152		0.381901	0.642402	-0.145865	0.622526	0.759965	0.455017
-1.477	0.0391852	0.0387164	-0.0195539	0.0604292	0.14647	0.494678			-0.674108	1.72005	0.0204862	0.640621	0.33063	0.468385		0.395296	0.659375	-0.156902	0.630789	0.765137	0.463148
-1.476	0.0368169	0.0407213	-0.0123612	0.0622039	0.147294	0.491002			-0.703372	1.70261	0.0234883	0.637653	0.327056	0.454992		0.403687	0.669947	-0.147849	0.635622	0.767398	0.48251
-1.475	0.0332644	0.0440415	-0.0170251	0.0620543	0.1498	0.496163			-0.734588	1.68669	0.0332954	0.632032	0.324789	0.457233		0.410949	0.680928	-0.13895	0.641186	0.771283	0.481694
-1.474	0.0321258	0.0468518	-0.018356	0.066198	0.152332	0.49452			-0.768339	1.67477	0.0376644	0.631267	0.322895	0.45968		0.417081	0.686306	-0.133216	0.650308	0.766052	0.471445
-1.473	0.034608	0.0526223	-0.0155161	0.0657847	0.162999	0.497976			-0.797603	1.66079	0.035063	0.62916	0.322456	0.452434		0.430556	0.697517	-0.134067	0.660951	0.772392	0.479602
-1.472	0.0342436	0.0563031	-0.0188136	0.0672467	0.165893	0.503301			-0.824722	1.64598	0.0351521	0.621789	0.321163	0.438856		0.439512	0.705394	-0.135681	0.669646	0.773208	0.483063
-1.471	0.0325357	0.062979	-0.023156	0.0714823	0.1716	0.499029			-0.854961	1.6294	0.0459957	0.617521	0.318702	0.453936		0.449598	0.722766	-0.132287	0.678083	0.777873	0.47453
-1.47	0.0300535	0.0674794	-0.022032	0.0729692	0.174394	0.4989			-0.884226	1.61443	0.0418387	0.614582	0.318136	0.459689		0.459361	0.747642	-0.121078	0.684823	0.796949	0.479145
-1.469	0.0306	0.0711356	-0.0201807	0.0748702	0.176684	0.500703			-0.911636	1.60329	0.0495719	0.61099	0.320414	0.464458		0.469932	0.761847	-0.123281	0.689872	0.805222	0.476117
-1.468	0.0332872	0.0752104	-0.0203405	0.0791278	0.179783	0.504635			-0.939047	1.58887	0.0580704	0.603909	0.319933	0.464393		0.48026	0.768744	-0.111409	0.698075	0.807826	0.481235
-1.467	0.037705	0.079486	-0.0211878	0.0822974	0.181704	0.5093			-0.968799	1.57669	0.0685555	0.603004	0.320681	0.468253		0.496558	0.78068	-0.101029	0.713485	0.811679	0.468775
-1.466	0.0393674	0.0834642	-0.0167901	0.0843676	0.185842	0.512059			-0.994942	1.55898	0.0640689	0.597792	0.318673	0.473855		0.513341	0.794877	-0.118933	0.718468	0.81098	0.46904
-1.465	0.0388209	0.0899663	-0.0172219	0.0874693	0.18868	0.508216			-1.02206	1.54442	0.0812971	0.590599	0.315851	0.460622		0.527865	0.804387	-0.127453	0.722606	0.812538	0.467436
-1.464	0.0389348	0.0950483	-0.0149879	0.092676	0.191402	0.515936			-1.05035	1.53009	0.0954562	0.585345	0.314418	0.450347		0.541179	0.822096	-0.142973	0.729873	0.820844	0.455496
-1.463	0.0401189	0.101431	-0.0213372	0.0941471	0.198564	0.512128			-1.07922	1.51595	0.115469	0.581424	0.313782	0.474883		0.555299	0.835719	-0.131122	0.739236	0.819257	0.453537
-1.462	0.0446051	0.109243	-0.0235913	0.0965807	0.205022	0.513195			-1.10537	1.50098	0.104469	0.576067	0.311988	0.475818		0.572405	0.852862	-0.131653	0.743093	0.819741	0.446488
-1.461	0.0451061	0.115133	-0.0155957	0.100286	0.207471	0.513761			-1.13502	1.4908	0.0889774	0.570852	0.309871	0.472523		0.583378	0.869265	-0.131282	0.751937	0.827913	0.452204
-1.46	0.0453338	0.119289	-0.0148586	0.104407	0.211177	0.503353			-1.16194	1.48032	0.0819237	0.56619	0.304799	0.480622		0.599032	0.886391	-0.134987	0.764174	0.832851	0.454542
-1.459	0.0424645	0.124277	-0.0082356	0.105121	0.214457	0.496426			-1.18906	1.46652	0.0686076	0.560795	0.30293	0.480165		0.609924	0.904702	-0.125453	0.764374	0.838387	0.432823
-1.458	0.0405744	0.131184	-0.00871613	0.108385	0.222316	0.493504			-1.21335	1.45139	0.0661633	0.551	0.300225	0.488189		0.621059	0.916756	-0.148164	0.770151	0.841179	0.434559
-1.457	0.0404605	0.135919	-0.00956415	0.114553	0.225991	0.494024			-1.24359	1.43724	0.0762032	0.548509	0.298435	0.491372		0.630419	0.933768	-0.146692	0.778358	0.849224	0.433304
-1.456	0.043512	0.141538	-0.0170495	0.116556	0.230046	0.495623			-1.26993	1.4223	0.0886781	0.542482	0.296245	0.496803		0.642926	0.950243	-0.147152	0.788632	0.856258	0.442071
-1.455	0.0427605	0.147414	-0.0128297	0.118494	0.235497	0.505089			-1.29295	1.4122	0.0833756	0.535751	0.294718	0.503917		0.657772	0.96864	-0.131258	0.793841	0.862067	0.438821
-1.454	0.0421001	0.15144	-0.01034	0.122439	0.239545	0.504103			-1.31578	1.40075	0.0758254	0.525925	0.29367	0.50312		0.668665	0.996701	-0.118188	0.801432	0.878172	0.438165
-1.453	0.0411665	0.159041	-0.0232455	0.126617	0.24866	0.504176			-1.33968	1.39012	0.0777463	0.521039	0.297891	0.499196		0.68214	1.01049	-0.110289	0.808008	0.885535	0.445303
-1.452	0.0438081	0.166424	-0.0244473	0.130763	0.257148	0.502804			-1.36426	1.37636	0.0657866	0.514107	0.298114	0.495541		0.694404	1.02919	-0.0988636	0.813396	0.882882	0.444403
-1.451	0.0466774	0.171316	-0.0256458	0.135931	0.260422	0.501244			-1.38718	1.36191	0.0573719	0.504714	0.297083	0.488526		0.711187	1.03965	-0.0819412	0.820476	0.877517	0.456642
-1.45	0.0525527	0.177281	-0.0249046	0.141484	0.266372	0.503959			-1.40864	1.35101	0.0615649	0.50023	0.298863	0.500928		0.728777	1.05818	-0.0800295	0.828256	0.878336	0.455534
-1.449	0.053919	0.183129	-0.0263329	0.143304	0.272195	0.502668			-1.43244	1.33991	0.0557378	0.495798	0.297842	0.513227		0.747981	1.06895	-0.082315	0.835368	0.878244	0.450873
-1.448	0.0545794	0.191816	-0.0250201	0.148355	0.281206	0.496167			-1.45098	1.32859	0.0484816	0.484659	0.297057	0.516113		0.764199	1.08734	-0.0711559	0.836113	0.879084	0.453874
-1.447	0.0550576	0.200432	-0.0264987	0.154273	0.288326	0.493103			-1.47205	1.31943	0.0580767	0.476021	0.299329	0.52597		0.779772	1.10731	-0.0737756	0.839656	0.872968	0.465315
-1.446	0.0607052	0.207782	-0.022196	0.1596	0.294953	0.486664			-1.498	1.30794	0.0633439	0.47071	0.297549	0.531383		0.795586	1.12547	-0.0735329	0.848332	0.874147	0.471434
-1.445	0.0646448	0.216232	-0.0275249	0.161104	0.301093	0.484214			-1.51887	1.29339	0.0533597	0.465164	0.294944	0.533078		0.813096	1.14619	-0.0663918	0.852531	0.88387	0.476627
-1.444	0.0679468	0.223984	-0.0295412	0.166573	0.307619	0.482994			-1.53643	1.27991	0.0429089	0.454906	0.29262	0.524511		0.831734	1.16287	-0.0686024	0.859605	0.886575	0.475466
-1.443	0.0670815	0.231431	-0.0376287	0.173035	0.310137	0.487819			-1.56013	1.26989	0.0423837	0.450242	0.29493	0.513833		0.845129	1.18252	-0.0556389	0.866113	0.893382	0.479912
-1.442	0.0661934	0.240331	-0.0392495	0.175776	0.316737	0.489656			-1.58072	1.25716	0.0490518	0.442529	0.292644	0.501331		0.860136	1.19181	-0.0703406	0.868554	0.898162	0.486375
-1.441	0.0678558	0.246233	-0.0335243	0.179414	0.318932	0.488227			-1.60003	1.24642	0.0392944	0.432242	0.293691	0.487481		0.871029	1.20833	-0.0653564	0.871465	0.89446	0.476109
-1.44	0.0711122	0.253185	-0.046837	0.187321	0.324149	0.483474			-1.62051	1.23392	0.0520063	0.42479	0.292056	0.483091		0.887005	1.22536	-0.0783901	0.876891	0.898229	0.471758
-1.439	0.0744598	0.261204	-0.0430975	0.18976	0.330697	0.489904			-1.63954	1.22327	0.0405386	0.421621	0.288932	0.478873		0.900884	1.24551	-0.0694989	0.885992	0.901594	0.471071
-1.438	0.0758944	0.269299	-0.0493849	0.193719	0.338054	0.495216			-1.65427	1.21212	0.0276136	0.411254	0.285057	0.481338		0.918554	1.25287	-0.0670699	0.888056	0.89996	0.478809
-1.437	0.0767825	0.274625	-0.0481247	0.199699	0.341179	0.500969			-1.6689	1.20389	0.0147999	0.401311	0.286138	0.46712		0.931303	1.27078	-0.0689464	0.892981	0.903786	0.464888
-1.436	0.079743	0.282731	-0.0433924	0.207069	0.345376	0.51051			-1.68568	1.19483	0.043371	0.391877	0.283708	0.46815		0.94389	1.2861	-0.075482	0.894612	0.906097	0.462144
-1.435	0.0845252	0.290018	-0.0478317	0.212612	0.348896	0.507351			-1.70684	1.18422	0.0477133	0.384461	0.281016	0.467909		0.960996	1.30502	-0.0840943	0.897593	0.90869	0.461604
-1.434	0.0928599	0.297118	-0.0455278	0.216224	0.354851	0.513995			-1.7204	1.17351	0.0517555	0.377037	0.277692	0.474688		0.979473	1.33534	-0.0841307	0.903167	0.911948	0.47158
-1.433	0.0990768	0.304399	-0.0444879	0.224446	0.358777	0.511319			-1.73416	1.16223	0.0479454	0.368262	0.275328	0.459722		1.00021	1.3511	-0.103263	0.905335	0.914827	0.472311
-1.432	0.102971	0.312403	-0.0430874	0.228449	0.365837	0.514164			-1.74908	1.15201	0.0355436	0.363061	0.275768	0.447238		1.02248	1.36666	-0.101147	0.913492	0.911079	0.469695
-1.431	0.105658	0.325203	-0.0433649	0.233875	0.376622	0.511084			-1.76332	1.14012	0.0373003	0.353284	0.275169	0.452475		1.04007	1.3862	-0.102743	0.909989	0.91022	0.46535
-1.43	0.111829	0.332419	-0.0439778	0.240829	0.382618	0.507098			-1.77484	1.12959	0.0561408	0.34379	0.272079	0.44669		1.05629	1.41107	-0.0979261	0.911457	0.913244	0.467754
-1.429	0.117864	0.343599	-0.0413656	0.247723	0.392253	0.503281			-1.79395	1.11959	0.0587985	0.336461	0.270564	0.44161		1.07581	1.42129	-0.0937189	0.915672	0.910567	0.467373
-1.428	0.125698	0.351639	-0.0389294	0.252898	0.397199	0.50535			-1.80829	1.10958	0.0594296	0.33158	0.267205	0.429887		1.09502	1.44057	-0.0835786	0.920285	0.911616	0.462989
-1.427	0.130708	0.362174	-0.0322601	0.256156	0.405362	0.516558			-1.81756	1.09814	0.0595605	0.323849	0.262084	0.43003		1.11438	1.45921	-0.0902988	0.922263	0.909105	0.453712
-1.426	0.133235	0.372297	-0.0280468	0.264932	0.412748	0.519048			-1.83258	1.08619	0.0570564	0.314598	0.258257	0.426535		1.13052	1.4678	-0.0936783	0.924971	0.905168	0.441264
-1.425	0.136446	0.380972	-0.0258967	0.271768	0.419713	0.518045			-1.84565	1.07461	0.0399143	0.309245	0.25381	0.433042		1.14424	1.48085	-0.087488	0.925423	0.907979	0.462359
-1.424	0.142481	0.390209	-0.036753	0.276232	0.425398	0.510148			-1.85824	1.06168	0.0539968	0.299464	0.249284	0.453485		1.15876	1.49533	-0.0863625	0.926506	0.908643	0.463971
-1.423	0.148698	0.40015	-0.0338627	0.282653	0.428045	0.505925			-1.86926	1.05062	0.0613082	0.292397	0.244574	0.445367		1.1745	1.51171	-0.0987688	0.930401	0.910077	0.46156
-1.422	0.153936	0.40929	-0.0374609	0.28967	0.432187	0.506476			-1.88048	1.03886	0.0552873	0.28613	0.241802	0.448529		1.18966	1.53658	-0.106522	0.934448	0.907768	0.459717
-1.421	0.159378	0.420066	-0.0317867	0.29545	0.442029	0.51109			-1.89092	1.02694	0.0624597	0.28173	0.237285	0.434895		1.20742	1.55935	-0.126597	0.935657	0.911804	0.464146
-1.42	0.164069	0.429786	-0.0315035	0.301946	0.448554	0.506764			-1.89755	1.01311	0.047441	0.271183	0.233498	0.450225		1.22452	1.57184	-0.117535	0.935386	0.908618	0.47749
-1.419	0.17122	0.439945	-0.0364754	0.309834	0.453557	0.503347			-1.90584	1.00069	0.0643834	0.262891	0.231226	0.451351		1.23945	1.5862	-0.116077	0.934173	0.912707	0.478747
-1.418	0.180966	0.451906	-0.033807	0.316524	0.460684	0.500214			-1.9195	0.988364	0.0564785	0.254972	0.227033	0.439994		1.25623	1.59773	-0.1205	0.93618	0.911982	0.487012
-1.417	0.192011	0.464363	-0.0352224	0.321112	0.471715	0.499659			-1.92506	0.977432	0.0515759	0.249716	0.223891	0.440938		1.27705	1.61353	-0.109457	0.936222	0.917411	0.503484
-1.416	0.200824	0.472742	-0.0319605	0.329202	0.472789	0.497686			-1.92964	0.965938	0.0588436	0.243334	0.221307	0.452251		1.29762	1.63205	-0.107305	0.93814	0.919818	0.499104
-1.415	0.207997	0.483614	-0.0237748	0.33701	0.477907	0.489518			-1.93676	0.955837	0.0551423	0.23485	0.21614	0.453126		1.31562	1.65384	-0.115441	0.935637	0.923682	0.501114
-1.414	0.215148	0.494194	-0.0211377	0.344226	0.483547	0.495792			-1.94652	0.947087	0.0586492	0.229922	0.212588	0.448601		1.33813	1.67473	-0.132942	0.935813	0.922708	0.502743
-1.413	0.226671	0.506986	-0.026405	0.349597	0.490881	0.497062			-1.95081	0.936691	0.0691517	0.220166	0.208625	0.457343		1.35483	1.68533	-0.138072	0.93231	0.92269	0.500942
-1.412	0.237214	0.51628	-0.0251947	0.357345	0.494285	0.500156			-1.95852	0.926282	0.0728045	0.216119	0.206611	0.457431		1.37404	1.70192	-0.144298	0.933262	0.922491	0.505102
-1.411	0.24769	0.530732	-0.0241545	0.364144	0.504721	0.506295			-1.96671	0.916147	0.0736061	0.214555	0.202855	0.457645		1.39348	1.71609	-0.154051	0.934929	0.920848	0.494613
-1.41	0.254749	0.543347	-0.0159681	0.369061	0.509193	0.506253			-1.97052	0.906297	0.085818	0.209074	0.199514	0.446065		1.4122	1.74616	-0.157514	0.935002	0.915588	0.477628
-1.409	0.261262	0.558766	-0.00534945	0.378474	0.514331	0.503062			-1.9753	0.895314	0.0881808	0.201245	0.196594	0.435958		1.426	1.76137	-0.153808	0.936925	0.912017	0.480426
-1.408	0.268504	0.57262	-0.00502697	0.385565	0.522673	0.505465			-1.98212	0.884769	0.0898497	0.195692	0.192556	0.449595		1.43867	1.77872	-0.15644	0.933352	0.9014	0.480043
-1.407	0.278114	0.586919	-0.00267447	0.391633	0.531495	0.498278			-1.98905	0.87463	0.0862063	0.194347	0.189718	0.457137		1.45561	1.79529	-0.157287	0.935907	0.900551	0.469433
-1.406	0.289318	0.598251	-0.00540748	0.397073	0.537812	0.496524			-1.99237	0.864069	0.0799254	0.187934	0.186437	0.452843		1.47215	1.81493	-0.153523	0.933553	0.904969	0.480928
-1.405	0.298586	0.611245	-0.000947312	0.406196	0.541276	0.50995			-1.99461	0.855472	0.0737471	0.181484	0.184347	0.440063		1.48877	1.82698	-0.157909	0.936212	0.899919	0.477729
-1.404	0.307308	0.624711	-0.00103	0.413083	0.545635	0.507973			-1.99783	0.84709	0.0573084	0.180054	0.181942	0.420822		1.50152	1.84038	-0.164195	0.934151	0.90325	0.485869
-1.403	0.315665	0.640065	0.00351943	0.419213	0.550487	0.506807			-1.99812	0.837396	0.0536016	0.174106	0.181502	0.415516		1.51976	1.85467	-0.153993	0.931565	0.898762	0.491369
-1.402	0.327667	0.656873	0.00493837	0.42692	0.559136	0.515287			-2.00105	0.828529	0.0498424	0.165464	0.178877	0.418921		1.53347	1.86526	-0.155482	0.926822	0.893696	0.481783
-1.401	0.341398	0.670055	-0.000469036	0.435214	0.56223	0.505913			-2.00339	0.818136	0.0475327	0.160835	0.177139	0.411141		1.55042	1.88031	-0.152942	0.926991	0.889445	0.475711
-1.4	0.355563	0.68509	0.00296448	0.440197	0.563114	0.507931			-2.00349	0.812453	0.0559582	0.161757	0.175359	0.410357		1.57091	1.8895	-0.160999	0.927492	0.887965	0.477778
-1.399	0.367928	0.698661	0.00244249	0.447502	0.569025	0.512469			-2.00368	0.804225	0.0682908	0.154225	0.175638	0.41864		1.59036	1.90674	-0.175451	0.923491	0.899034	0.476722
-1.398	0.378312	0.710113	0.0087127	0.456783	0.57265	0.512768			-2.00436	0.794665	0.0797564	0.151683	0.174349	0.434411		1.60835	1.92836	-0.173538	0.920283	0.902148	0.47523
-1.397	0.39045	0.72155	0.0154567	0.464889	0.576879	0.510759			-2.0069	0.784045	0.0753523	0.149818	0.173646	0.421654		1.62409	1.94467	-0.176127	0.913958	0.902399	0.484822
-1.396	0.40482	0.736246	0.00997604	0.468769	0.580371	0.506569			-2.00749	0.776345	0.0609365	0.144361	0.17114	0.415246		1.64313	1.9617	-0.171376	0.915263	0.910673	0.481234
-1.395	0.419143	0.753018	0.00720082	0.474836	0.588621	0.506395			-2.00651	0.765727	0.0574799	0.141373	0.169312	0.400039		1.65886	1.9763	-0.173362	0.910628	0.906611	0.489793
-1.394	0.431987	0.765311	0.0113607	0.484109	0.591265	0.507472			-2.00827	0.756573	0.0610562	0.142571	0.168145	0.401713		1.67581	1.99466	-0.177358	0.910761	0.909257	0.480977
-1.393	0.442417	0.77878	0.00899345	0.489567	0.595535	0.500901			-2.00778	0.747413	0.0561707	0.143028	0.166552	0.410579		1.6917	2.01789	-0.173976	0.909323	0.916744	0.498331
-1.392	0.451662	0.791479	0.0027198	0.497971	0.600772	0.507003			-2.00632	0.737203	0.0563914	0.136266	0.166697	0.402746		1.70493	2.03214	-0.181386	0.90571	0.916141	0.491923
-1.391	0.464415	0.807972	0.00590112	0.505332	0.60651	0.501504			-2.00632	0.727378	0.0378301	0.132201	0.165897	0.413144		1.71655	2.04972	-0.179765	0.901129	0.909923	0.497135
-1.39	0.476712	0.82405	0.0059402	0.510468	0.614367	0.502358			-2.00758	0.718761	0.0309933	0.137033	0.165202	0.398385		1.7293	2.06414	-0.181911	0.898969	0.910704	0.49991
-1.389	0.491355	0.837102	0.00793813	0.515472	0.620135	0.499024			-2.00505	0.71059	0.0437345	0.132232	0.165153	0.405859		1.74584	2.08052	-0.165891	0.898688	0.904843	0.500076
-1.388	0.502832	0.848588	0.0171394	0.522907	0.620371	0.505981			-1.99988	0.699977	0.0267825	0.13016	0.163872	0.4104		1.75795	2.09596	-0.157114	0.896883	0.906601	0.50283
-1.387	0.515494	0.859818	0.0204346	0.531297	0.623003	0.501978			-1.99676	0.690454	0.0101396	0.131286	0.161631	0.403234		1.77086	2.10948	-0.148772	0.893324	0.902207	0.499778
-1.386	0.527722	0.873904	0.017179	0.537414	0.627366	0.491227			-1.99393	0.681597	0.00364681	0.132711	0.158813	0.390192		1.78256	2.11939	-0.137093	0.888539	0.899167	0.501978
-1.385	0.542821	0.887457	0.0169401	0.542954	0.631216	0.493615			-1.99051	0.674633	0.010993	0.125845	0.157584	0.388779		1.79894	2.13448	-0.149948	0.884039	0.897776	0.504018
-1.384	0.560287	0.905911	0.0141703	0.548838	0.632188	0.497539			-1.98544	0.66614	-0.00227878	0.125513	0.156961	0.398493		1.81451	2.15653	-0.142896	0.879382	0.901825	0.523197
-1.383	0.577093	0.921377	0.0174047	0.555535	0.633725	0.495287			-1.98466	0.659217	-0.00721436	0.12873	0.156073	0.393561		1.83242	2.17042	-0.14609	0.875799	0.905604	0.532352
-1.382	0.591462	0.936222	0.0136638	0.561903	0.635847	0.490137			-1.97803	0.651802	-0.0137131	0.12538	0.155315	0.389541		1.85066	2.18391	-0.145438	0.873558	0.899964	0.534091
-1.381	0.605786	0.95139	0.0193292	0.568168	0.640265	0.485335			-1.9711	0.644384	-0.0267764	0.123001	0.153045	0.397138		1.86236	2.1982	-0.131499	0.866422	0.890542	0.540253
-1.38	0.621112	0.966766	0.0186787	0.575849	0.639719	0.482903			-1.97159	0.638586	-0.0266821	0.125249	0.15296	0.402089		1.87664	2.21876	-0.1385	0.861142	0.884094	0.548746
-1.379	0.638169	0.983148	0.0158528	0.579463	0.64456	0.482954			-1.97003	0.630098	-0.0189592	0.125532	0.15211	0.415164		1.88979	2.233	-0.12874	0.857677	0.884927	0.544976
-1.378	0.655407	0.995736	0.0177333	0.584762	0.649847	0.479229			-1.96398	0.622314	-0.0226785	0.128613	0.152669	0.420602		1.9069	2.23854	-0.115029	0.854447	0.88361	0.541812
-1.377	0.669663	1.00927	0.0152639	0.591302	0.652584	0.472384			-1.95852	0.612993	-0.025564	0.126861	0.150707	0.438241		1.91843	2.24838	-0.114885	0.849674	0.884033	0.533868
-1.376	0.682666	1.01928	0.0187548	0.597065	0.654614	0.470633			-1.9553	0.604868	-0.0238111	0.133177	0.149922	0.443868		1.92981	2.26118	-0.112136	0.848106	0.87657	0.531462
-1.375	0.695851	1.03074	0.0133539	0.602478	0.655954	0.476929			-1.95159	0.595725	-0.0245413	0.131931	0.147582	0.449073		1.94078	2.27778	-0.0964538	0.844662	0.877162	0.529079
-1.374	0.710699	1.04462	0.0123064	0.607146	0.657783	0.483932			-1.94418	0.586302	-0.00320968	0.131629	0.145241	0.462381		1.94918	2.28996	-0.0910434	0.83928	0.877716	0.526472
-1.373	0.727141	1.0606	0.008152	0.611951	0.658572	0.48357			-1.94223	0.57782	-0.00355591	0.135829	0.14196	0.459656		1.9587	2.30472	-0.0991978	0.835644	0.878435	0.536992
-1.372	0.743286	1.07517	0.00855383	0.61566	0.663901	0.484065			-1.93667	0.570141	0.00508582	0.139926	0.139633	0.452544		1.97072	2.32551	-0.0946898	0.832064	0.878015	0.54021
-1.371	0.758111	1.08896	0.0134726	0.621605	0.659434	0.488021			-1.92642	0.561607	0.0144815	0.138781	0.139384	0.430955		1.98234	2.34209	-0.100661	0.829555	0.870252	0.547449
-1.37	0.771319	1.1018	0.0172386	0.627562	0.66197	0.48379			-1.92047	0.555166	0.0269356	0.138732	0.135771	0.432254		1.99041	2.35724	-0.102528	0.820134	0.866101	0.531234
-1.369	0.787897	1.12018	0.0202166	0.631761	0.660778	0.484271			-1.91443	0.5477	0.0254766	0.142895	0.1352	0.428321		1.99928	2.37033	-0.0817933	0.81758	0.863645	0.538876
-1.368	0.806343	1.13409	0.029271	0.635205	0.656187	0.47731			-1.91023	0.541857	0.0397138	0.142462	0.135014	0.402658		2.01203	2.39133	-0.0904088	0.813795	0.862224	0.557084
-1.367	0.82595	1.14623	0.0263193	0.639433	0.656597	0.482889			-1.89931	0.536448	0.0403604	0.143717	0.134588	0.413539		2.02422	2.39734	-0.0820604	0.805977	0.851782	0.558116
-1.366	0.843257	1.16177	0.0243293	0.644075	0.656663	0.475549			-1.89238	0.533678	0.0539943	0.148053	0.134091	0.406968		2.03834	2.40775	-0.0783964	0.801363	0.844183	0.561523
-1.365	0.860132	1.17797	0.023404	0.64866	0.656753	0.478946			-1.88526	0.528899	0.0652437	0.146743	0.134179	0.417565		2.05141	2.41774	-0.0869318	0.797695	0.841612	0.560484
-1.364	0.877234	1.19902	0.0182786	0.653082	0.655499	0.479362			-1.8758	0.525679	0.0517411	0.148151	0.137273	0.418172		2.06109	2.42853	-0.0824337	0.790913	0.83392	0.570716
-1.363	0.895406	1.21401	0.0258403	0.657307	0.655793	0.483634			-1.86946	0.522916	0.0460359	0.151043	0.13705	0.409053		2.07118	2.43566	-0.072739	0.7853	0.830715	0.577134
-1.362	0.913784	1.23226	0.0209374	0.659125	0.658	0.485336			-1.8677	0.520647	0.0390973	0.154008	0.137853	0.400839		2.08134	2.45359	-0.0855996	0.78124	0.827962	0.574996
-1.361	0.933163	1.24749	0.0205139	0.661497	0.654364	0.486458			-1.86107	0.516369	0.0383979	0.158288	0.138857	0.396355		2.09345	2.46458	-0.0879991	0.776334	0.819651	0.576518
-1.36	0.948785	1.26393	0.0286684	0.664959	0.648183	0.489516			-1.85063	0.510895	0.0291913	0.158695	0.140319	0.418927		2.102	2.47144	-0.0824291	0.773126	0.810058	0.567624
-1.359	0.962129	1.28856	0.0301886	0.669678	0.647592	0.493869			-1.84429	0.505479	0.0216742	0.164038	0.13852	0.40859		2.10668	2.4782	-0.0859877	0.767903	0.805587	0.555876
-1.358	0.97807	1.31403	0.0294721	0.671975	0.651534	0.495528			-1.83824	0.500343	0.0294118	0.165781	0.139257	0.402546		2.11233	2.49376	-0.0963426	0.764021	0.804194	0.539621
-1.357	0.995582	1.338	0.0224901	0.674026	0.651433	0.499379			-1.83161	0.494131	0.0299402	0.166093	0.138139	0.411975		2.11902	2.51281	-0.0814669	0.760872	0.809591	0.542333
-1.356	1.01223	1.35916	0.0162556	0.675571	0.652679	0.495227			-1.82468	0.48935	0.0453034	0.168345	0.138196	0.398061		2.1258	2.51999	-0.0664706	0.757461	0.808491	0.534155
-1.355	1.03088	1.37639	0.0152065	0.677496	0.654129	0.494081			-1.81551	0.484589	0.0723388	0.171397	0.13634	0.39313		2.13153	2.52603	-0.0669498	0.75228	0.797371	0.547108
-1.354	1.04568	1.39055	0.0156816	0.680036	0.652879	0.486661			-1.8041	0.477507	0.0639412	0.173952	0.135884	0.402405		2.1375	2.53911	-0.0637178	0.749396	0.795464	0.550796
-1.353	1.06176	1.4018	0.0136514	0.682185	0.650185	0.489512			-1.79317	0.472279	0.0713014	0.175787	0.134378	0.394204		2.1417	2.55596	-0.067061	0.746708	0.78132	0.549685
-1.352	1.07852	1.41491	0.0224312	0.683948	0.651305	0.485914			-1.788	0.466872	0.073943	0.177253	0.133914	0.400386		2.14662	2.56682	-0.0680214	0.74018	0.780462	0.553814
-1.351	1.10072	1.42681	0.0190531	0.684391	0.648621	0.489466			-1.77922	0.461987	0.0677407	0.179299	0.133046	0.405136		2.15453	2.57855	-0.077948	0.735812	0.78043	0.559241
-1.35	1.12069	1.44115	0.0116145	0.685675	0.647294	0.49298			-1.76898	0.457781	0.0737984	0.176626	0.13351	0.396279		2.1651	2.59416	-0.0863261	0.730028	0.777165	0.565271
-1.349	1.13859	1.45748	0.0143118	0.688346	0.650271	0.492239			-1.75708	0.452616	0.0771474	0.181804	0.133676	0.405524		2.17292	2.61147	-0.0913836	0.726696	0.782089	0.554402
-1.348	1.15585	1.4754	0.0175962	0.690198	0.651037	0.493863			-1.74996	0.447413	0.0704621	0.183837	0.13183	0.407976		2.18018	2.6284	-0.101203	0.723587	0.78106	0.537532
-1.347	1.17334	1.48923	0.0261316	0.690397	0.650649	0.488415			-1.7406	0.444847	0.0779628	0.184388	0.130919	0.401712		2.18301	2.64031	-0.10349	0.718804	0.782532	0.545232
-1.346	1.19334	1.50387	0.0271203	0.690948	0.653151	0.494853			-1.73211	0.441148	0.083229	0.185914	0.13111	0.395623		2.19051	2.65354	-0.0996211	0.715287	0.778664	0.561975
-1.345	1.2124	1.51777	0.0266027	0.690127	0.650393	0.485626			-1.72577	0.437707	0.0786834	0.189638	0.133363	0.398416		2.1956	2.6705	-0.10775	0.71017	0.785683	0.565467
-1.344	1.23075	1.53317	0.0253275	0.690472	0.646512	0.475025			-1.71787	0.432475	0.0696901	0.191786	0.133059	0.404654		2.20132	2.68019	-0.10224	0.708594	0.782153	0.559638
-1.343	1.24663	1.5503	0.0251885	0.690128	0.64784	0.47415			-1.70489	0.426244	0.0608086	0.19238	0.133	0.428778		2.20504	2.68874	-0.107202	0.708985	0.778678	0.551365
-1.342	1.26104	1.57157	0.0217876	0.691205	0.651395	0.469862			-1.69885	0.423002	0.0606763	0.196457	0.137713	0.436629		2.20625	2.69834	-0.107481	0.706761	0.781863	0.54384
-1.341	1.27694	1.58614	0.0295412	0.69034	0.651531	0.471293			-1.69299	0.417633	0.0525712	0.19825	0.136648	0.430804		2.20213	2.70106	-0.111664	0.706507	0.779219	0.552264
-1.34	1.29593	1.60428	0.0295165	0.686983	0.652369	0.470205			-1.68285	0.413014	0.047668	0.196441	0.13478	0.432956		2.20471	2.70837	-0.104559	0.7055	0.769746	0.554075
-1.339	1.31273	1.62181	0.0269064	0.685762	0.652641	0.47456			-1.6727	0.407435	0.0560426	0.198981	0.133985	0.437603		2.20625	2.71141	-0.0971541	0.704397	0.759303	0.55939
-1.338	1.32902	1.64237	0.0304481	0.685398	0.651568	0.476493			-1.66402	0.400403	0.0623441	0.201578	0.132098	0.434965		2.20544	2.72202	-0.102769	0.700242	0.752238	0.551614
-1.337	1.34436	1.65903	0.0311475	0.684485	0.643401	0.483519			-1.65339	0.397407	0.0663275	0.20383	0.132572	0.435216		2.20665	2.72619	-0.107195	0.701218	0.751365	0.533999
-1.336	1.36074	1.67661	0.0339355	0.683079	0.643161	0.487571			-1.64363	0.391868	0.054362	0.203102	0.131044	0.43907		2.20665	2.73468	-0.103789	0.698493	0.743749	0.534341
-1.335	1.37921	1.69427	0.0312879	0.681413	0.644007	0.48723			-1.63212	0.39082	0.0688311	0.206562	0.130172	0.454599		2.20487	2.75171	-0.0950502	0.697714	0.733831	0.534322
-1.334	1.40004	1.71214	0.0327755	0.678775	0.64312	0.493359			-1.62393	0.389311	0.0574251	0.205831	0.130975	0.456788		2.20826	2.76223	-0.0956427	0.693	0.727427	0.530256
-1.333	1.41983	1.72715	0.0250515	0.675577	0.639202	0.490166			-1.61115	0.387374	0.0478345	0.205338	0.133021	0.468113		2.21512	2.763	-0.0987114	0.691102	0.716003	0.517491
-1.332	1.43691	1.74368	0.0233129	0.675362	0.637454	0.495003			-1.59896	0.38231	0.0392983	0.205423	0.133329	0.473205		2.21706	2.77827	-0.115464	0.691497	0.711619	0.511736
-1.331	1.45267	1.76499	0.0223945	0.674097	0.630203	0.489125			-1.59057	0.3793	0.0498196	0.209618	0.134251	0.479899		2.21722	2.78204	-0.124984	0.690829	0.712343	0.504786
-1.33	1.47	1.78075	0.0130757	0.671827	0.628453	0.490982			-1.58296	0.375469	0.0371731	0.208433	0.133875	0.473204		2.21609	2.7858	-0.117835	0.691437	0.714613	0.495079
-1.329	1.49043	1.80027	0.0147264	0.668157	0.628135	0.492344			-1.57242	0.372588	0.0311567	0.206609	0.134136	0.474284		2.21585	2.78137	-0.121442	0.69161	0.714037	0.491911
-1.328	1.50814	1.8145	0.00568106	0.66446	0.625674	0.49224			-1.5656	0.368213	0.0209571	0.21073	0.133574	0.480732		2.21577	2.78995	-0.119019	0.690158	0.711003	0.487325
-1.327	1.52497	1.83652	0.00313155	0.660578	0.621824	0.497962			-1.55691	0.363773	0.024741	0.212358	0.133856	0.477925		2.21577	2.81348	-0.120698	0.689615	0.713785	0.483464
-1.326	1.539	1.85505	0.00550334	0.657791	0.62277	0.501291			-1.54609	0.360389	0.0243675	0.208758	0.132818	0.479825		2.21238	2.81849	-0.120443	0.694306	0.713897	0.480024
-1.325	1.55257	1.86967	0.012494	0.654885	0.614118	0.501321			-1.53477	0.357909	0.0253525	0.213593	0.134475	0.491288		2.20479	2.82002	-0.109828	0.697887	0.711433	0.489726
-1.324	1.56822	1.88293	0.0174902	0.651163	0.622192	0.502577			-1.52745	0.35572	0.0281219	0.214748	0.135895	0.48896		2.19753	2.82699	-0.11439	0.697815	0.705667	0.479904
-1.323	1.58546	1.89938	0.0134667	0.645016	0.624481	0.50132			-1.52043	0.356537	0.0276573	0.212077	0.140924	0.489664		2.19342	2.82704	-0.123089	0.697659	0.702919	0.47043
-1.322	1.60288	1.90864	0.0165778	0.64027	0.621081	0.500704			-1.5099	0.353984	0.0222513	0.213166	0.144376	0.48756		2.19148	2.83662	-0.115475	0.701669	0.697976	0.479083
-1.321	1.61513	1.92249	0.0178287	0.636488	0.617625	0.499531			-1.49712	0.349924	0.0352488	0.215988	0.145224	0.493867		2.18551	2.84488	-0.123183	0.702711	0.692885	0.485292
-1.32	1.62943	1.93901	0.0134448	0.633932	0.615572	0.500017			-1.48561	0.348447	0.0349171	0.218401	0.148006	0.490755		2.17809	2.86313	-0.119375	0.706719	0.688134	0.483618
-1.319	1.64369	1.95483	0.0226006	0.628103	0.614567	0.496661			-1.47634	0.345028	0.0355987	0.214556	0.151127	0.482019		2.17276	2.86697	-0.130109	0.709299	0.682055	0.494584
-1.318	1.66181	1.96775	0.0228287	0.623431	0.618286	0.496609			-1.46424	0.340392	0.0427203	0.217486	0.150729	0.48256		2.16784	2.86798	-0.123242	0.709633	0.670659	0.498847
-1.317	1.68142	1.98416	0.0205202	0.617504	0.616718	0.503255			-1.45293	0.336581	0.0455693	0.216065	0.152455	0.467186		2.16308	2.88171	-0.124462	0.708607	0.676992	0.499344
-1.316	1.69786	1.99551	0.0244112	0.61264	0.61138	0.503913			-1.44356	0.334783	0.0460201	0.21559	0.151531	0.456396		2.16574	2.89349	-0.122571	0.712452	0.675313	0.499002
-1.315	1.71223	2.00845	0.023278	0.609418	0.607737	0.503413			-1.4301	0.334936	0.0504771	0.215781	0.149222	0.467354		2.15985	2.90642	-0.120216	0.716967	0.679756	0.505401
-1.314	1.72694	2.02229	0.0234977	0.605257	0.606357	0.502386			-1.41859	0.330207	0.0577584	0.218783	0.147162	0.449031		2.1538	2.90797	-0.128415	0.722121	0.671785	0.494899
-1.313	1.74231	2.03634	0.01921	0.599279	0.610549	0.505952			-1.41371	0.32673	0.0599776	0.21743	0.144663	0.439839		2.14734	2.91224	-0.119982	0.722854	0.666177	0.502936
-1.312	1.76062	2.05356	0.0247778	0.593922	0.609067	0.503619			-1.40454	0.323384	0.0510198	0.216123	0.143467	0.430604		2.14202	2.93294	-0.115724	0.728605	0.669051	0.509042
-1.311	1.77583	2.06593	0.0197215	0.588692	0.610845	0.509039			-1.39235	0.321665	0.0391459	0.216193	0.140797	0.409615		2.13871	2.9406	-0.130005	0.730297	0.665737	0.502103
-1.31	1.78941	2.07954	0.0224906	0.582671	0.607556	0.514586			-1.38289	0.317963	0.0571267	0.218113	0.138516	0.423885		2.12927	2.9422	-0.137961	0.732569	0.657202	0.498038
-1.309	1.79981	2.09626	0.0251849	0.576682	0.603777	0.520199			-1.37548	0.317825	0.0693463	0.216112	0.138703	0.424169		2.11918	2.93905	-0.131933	0.741553	0.649659	0.480639
-1.308	1.81147	2.11273	0.0207844	0.571608	0.604208	0.520435			-1.36543	0.313856	0.0665237	0.219225	0.137008	0.420964		2.10765	2.94951	-0.126754	0.749313	0.643577	0.484157
-1.307	1.82518	2.12282	0.0216613	0.564568	0.602822	0.517731			-1.35636	0.314412	0.0720058	0.21724	0.137602	0.428786		2.09651	2.94762	-0.127604	0.751573	0.638585	0.492844
-1.306	1.83957	2.14013	0.0199992	0.556362	0.602448	0.515433			-1.34514	0.312459	0.0794135	0.217305	0.136962	0.415286		2.0857	2.94824	-0.139885	0.752669	0.632896	0.486267
-1.305	1.85194	2.15332	0.0220236	0.55017	0.603182	0.513975			-1.33675	0.311161	0.0645288	0.216054	0.13547	0.413019		2.07731	2.95204	-0.130352	0.760012	0.631272	0.487644
-1.304	1.86298	2.16637	0.0200813	0.544945	0.603557	0.512448			-1.3229	0.308714	0.0623813	0.218538	0.133785	0.407447		2.06577	2.95112	-0.122769	0.767567	0.627886	0.500404
-1.303	1.87344	2.18374	0.0182837	0.538417	0.60124	0.507271			-1.31422	0.307106	0.056101	0.218881	0.132674	0.418027		2.05367	2.95224	-0.118355	0.773157	0.618802	0.486867
-1.302	1.88644	2.19621	0.0230356	0.532185	0.597555	0.514667			-1.30329	0.305039	0.0539598	0.219693	0.131659	0.430003		2.0414	2.9599	-0.121651	0.778678	0.612575	0.488581
-1.301	1.90256	2.20401	0.019242	0.525699	0.593066	0.510323			-1.29285	0.304939	0.0434523	0.218315	0.130581	0.431273		2.03495	2.97447	-0.128631	0.781779	0.606734	0.481434
-1.3	1.91709	2.21143	0.0223962	0.518629	0.589536	0.513846			-1.27949	0.301216	0.0570232	0.218276	0.128973	0.449628		2.02502	2.98458	-0.131494	0.787253	0.608053	0.489864
-1.299	1.93057	2.21851	0.0271545	0.512479	0.587846	0.513757			-1.27149	0.297497	0.0670536	0.216655	0.128969	0.464783		2.01873	2.99265	-0.130045	0.789991	0.595274	0.482535
-1.298	1.94059	2.23197	0.0228846	0.506316	0.590277	0.513257			-1.259	0.293022	0.0775009	0.21862	0.127023	0.459098		2.01122	2.98945	-0.129999	0.801167	0.596315	0.474561
-1.297	1.95237	2.24781	0.0265049	0.501863	0.58973	0.511418			-1.24788	0.289534	0.0827482	0.217278	0.12544	0.456512		1.99912	2.98702	-0.132825	0.808854	0.59004	0.471763
-1.296	1.96544	2.25565	0.0259548	0.494523	0.584061	0.511299			-1.24027	0.284421	0.0833771	0.217697	0.123833	0.460184		1.98904	2.9865	-0.127064	0.815007	0.59372	0.474783
-1.295	1.98003	2.27212	0.0281235	0.48674	0.580624	0.509105			-1.23403	0.278363	0.0685908	0.217093	0.122484	0.460582		1.97758	2.99061	-0.131616	0.819038	0.588372	0.499152
-1.294	1.99151	2.29107	0.0324602	0.480251	0.583167	0.505485			-1.21998	0.274347	0.0595753	0.215276	0.120816	0.460267		1.96749	3.00081	-0.144865	0.824464	0.588768	0.489567
-1.293	1.99978	2.30355	0.0263776	0.475332	0.582859	0.498688			-1.21052	0.269137	0.059729	0.214104	0.11929	0.450078		1.95507	3.01049	-0.148645	0.832312	0.598044	0.496801
-1.292	2.00547	2.31529	0.0254499	0.468343	0.580583	0.49633			-1.2034	0.265371	0.0648772	0.216376	0.117002	0.43356		1.93748	3.02552	-0.143788	0.841007	0.602344	0.495694
-1.291	2.01442	2.32692	0.0245107	0.46215	0.576842	0.49667			-1.1954	0.259782	0.0726442	0.212986	0.115951	0.437781		1.92223	3.0217	-0.140049	0.85012	0.592798	0.507365
-1.29	2.02631	2.33927	0.0213481	0.454039	0.572518	0.495783			-1.18477	0.254318	0.0725372	0.21579	0.114154	0.428932		1.90496	3.02743	-0.141915	0.8547	0.597862	0.489541
-1.289	2.03576	2.34961	0.024591	0.447174	0.564836	0.494253			-1.1756	0.248853	0.0620697	0.213667	0.112407	0.43876		1.8914	3.02351	-0.140154	0.859846	0.597549	0.492732
-1.288	2.04377	2.36384	0.0282131	0.439359	0.565608	0.490904			-1.16507	0.244031	0.0622417	0.211632	0.110301	0.433568		1.87632	3.02252	-0.136175	0.866893	0.600452	0.500476
-1.287	2.04972	2.38232	0.0364615	0.434715	0.563903	0.492859			-1.1519	0.240336	0.0568983	0.210817	0.107921	0.444793		1.86074	3.01505	-0.126627	0.878004	0.601333	0.498269
-1.286	2.05762	2.39624	0.0405395	0.42766	0.564902	0.479903			-1.14224	0.236906	0.0730096	0.211269	0.105889	0.451349		1.8442	3.01746	-0.132792	0.887267	0.597279	0.495636
-1.285	2.06677	2.40471	0.0390968	0.42208	0.564192	0.481622			-1.13483	0.232542	0.0691323	0.211386	0.104481	0.461476		1.82952	3.01842	-0.13029	0.893371	0.591703	0.493383
-1.284	2.07964	2.41571	0.0364655	0.414636	0.558416	0.480612			-1.12234	0.228136	0.0609222	0.208232	0.102841	0.473535		1.81628	3.02952	-0.142537	0.897731	0.583049	0.48668
-1.283	2.08898	2.42674	0.0346712	0.408953	0.552161	0.487903			-1.10937	0.223703	0.0581058	0.20891	0.101883	0.471885		1.80345	3.03366	-0.153248	0.904509	0.57265	0.487719
-1.282	2.09759	2.4419	0.0384726	0.403248	0.547676	0.484096			-1.09981	0.219503	0.0536507	0.206603	0.100384	0.470182		1.792	3.02548	-0.150919	0.913916	0.572903	0.477366
-1.281	2.10182	2.45423	0.0347975	0.398243	0.547529	0.479192			-1.09132	0.215091	0.0436885	0.206386	0.0988184	0.456824		1.77788	3.02643	-0.154726	0.924658	0.570104	0.486267
-1.28	2.11134	2.46633	0.0393961	0.394211	0.543401	0.470193			-1.07903	0.212303	0.0489867	0.204022	0.0958116	0.461194		1.76263	3.02396	-0.168502	0.934106	0.571892	0.484205
-1.279	2.11961	2.48451	0.0417598	0.388909	0.5403	0.477388			-1.06986	0.209894	0.0481891	0.206192	0.092804	0.448133		1.74722	3.0283	-0.176061	0.940201	0.571602	0.483862
-1.278	2.12837	2.49727	0.0389977	0.382008	0.540034	0.476064			-1.06352	0.207832	0.0576647	0.202962	0.0922001	0.44794		1.73148	3.02564	-0.18377	0.947405	0.571483	0.484192
-1.277	2.13548	2.50571	0.042142	0.376587	0.536483	0.475293			-1.0564	0.206375	0.0623463	0.198717	0.0921012	0.449864		1.71817	3.02852	-0.184339	0.953688	0.573377	0.487851
-1.276	2.13903	2.5165	0.0445809	0.37291	0.536964	0.474493			-1.04108	0.203481	0.0793989	0.196826	0.0916804	0.44897		1.69937	3.03335	-0.195529	0.961974	0.576256	0.490954
-1.275	2.14058	2.52752	0.048759	0.36902	0.535294	0.47285			-1.03611	0.201892	0.06289	0.19933	0.0928442	0.446603		1.67911	3.03123	-0.191697	0.97381	0.568007	0.479192
-1.274	2.14518	2.54032	0.054362	0.362208	0.532437	0.470464			-1.02811	0.199288	0.0433127	0.194936	0.0938379	0.429921		1.65789	3.02701	-0.190071	0.981105	0.567156	0.477859
-1.273	2.15254	2.54907	0.0490244	0.357169	0.530732	0.469704			-1.02011	0.19787	0.0318791	0.194152	0.0983574	0.427974		1.63998	3.02426	-0.190847	0.98702	0.56947	0.475815
-1.272	2.15695	2.55801	0.0425005	0.350787	0.530092	0.466467			-1.00694	0.194027	0.0420004	0.190551	0.0983553	0.416903		1.61876	3.03039	-0.190656	0.993308	0.570794	0.481094
-1.271	2.1598	2.56791	0.0450612	0.34698	0.528293	0.463481			-0.999527	0.192697	0.037327	0.189406	0.100728	0.405948		1.5998	3.0231	-0.187191	0.999692	0.567056	0.481639
-1.27	2.16105	2.57903	0.0447862	0.343658	0.523654	0.460651			-0.986846	0.18981	0.0437133	0.187037	0.10124	0.393651		1.58189	3.00893	-0.182485	1.00933	0.560445	0.469454
-1.269	2.16481	2.58808	0.0425554	0.340733	0.516406	0.460708			-0.978261	0.186653	0.0511771	0.186488	0.101289	0.401306		1.5597	3.00402	-0.183946	1.02087	0.560898	0.462488
-1.268	2.17055	2.60272	0.0404327	0.336591	0.511381	0.458187			-0.969092	0.181295	0.0495892	0.189105	0.100992	0.411243		1.54033	3.00091	-0.176288	1.02877	0.559016	0.469069
-1.267	2.17759	2.61222	0.0410828	0.331309	0.513585	0.456003			-0.96002	0.176977	0.0403421	0.18443	0.100551	0.414389		1.52541	2.99715	-0.18544	1.03158	0.564616	0.478045
-1.266	2.1815	2.62256	0.0423224	0.328891	0.513413	0.46326			-0.945681	0.172607	0.0454111	0.179574	0.0996515	0.430107		1.5108	2.99592	-0.191994	1.04109	0.566282	0.465546
-1.265	2.18351	2.63309	0.0435408	0.327461	0.51392	0.460502			-0.937682	0.170094	0.0513524	0.179884	0.0997794	0.451373		1.49184	2.98591	-0.199546	1.05055	0.55884	0.465894
-1.264	2.18398	2.64164	0.0572182	0.324222	0.510284	0.46461			-0.929293	0.165651	0.0500578	0.178249	0.0982557	0.441761		1.47368	2.97851	-0.201304	1.06237	0.55458	0.467467
-1.263	2.18861	2.6527	0.0627045	0.322707	0.509233	0.464511			-0.91983	0.161182	0.0405094	0.176012	0.0982136	0.446852		1.454	2.97645	-0.191944	1.06886	0.553286	0.482764
-1.262	2.19293	2.66001	0.0646236	0.321153	0.511287	0.459863			-0.911734	0.157848	0.0267479	0.174572	0.09709	0.44859		1.43673	2.97261	-0.178182	1.0764	0.551237	0.48744
-1.261	2.19441	2.67172	0.0597388	0.318043	0.509198	0.464766			-0.904711	0.152275	0.0377451	0.172926	0.0962599	0.43797		1.41922	2.95967	-0.177008	1.08253	0.548293	0.485992
-1.26	2.19507	2.6802	0.0613212	0.316504	0.508152	0.466813			-0.895346	0.149007	0.0334937	0.168322	0.0945626	0.436538		1.39873	2.95232	-0.183464	1.08723	0.557328	0.470614
-1.259	2.19268	2.68732	0.0631368	0.316881	0.505682	0.46379			-0.886664	0.146276	0.0353251	0.16806	0.0937799	0.449129		1.37759	2.95203	-0.170845	1.10018	0.559792	0.471299
-1.258	2.19082	2.69651	0.0645564	0.316829	0.501176	0.456434			-0.87808	0.143566	0.018896	0.168524	0.0937208	0.459528		1.35056	2.95373	-0.168114	1.11018	0.565055	0.46942
-1.257	2.19036	2.70415	0.0706928	0.315067	0.492337	0.457788			-0.871544	0.14006	0.0314676	0.165537	0.0930335	0.450269		1.32611	2.95156	-0.15424	1.11489	0.569379	0.449907
-1.256	2.19195	2.7119	0.0714037	0.314152	0.484536	0.46477			-0.864911	0.137713	0.02343	0.164722	0.0949685	0.472077		1.30642	2.94437	-0.141678	1.12037	0.575069	0.444918
-1.255	2.19057	2.72619	0.065297	0.31439	0.479747	0.467543			-0.853791	0.13418	0.0243773	0.163028	0.0932489	0.462168		1.28488	2.94776	-0.13194	1.12688	0.586826	0.445039
-1.254	2.1871	2.73884	0.0617887	0.314972	0.477015	0.464614			-0.843841	0.130351	0.0137205	0.158869	0.0932125	0.453139		1.26067	2.94098	-0.118882	1.13586	0.595023	0.455417
-1.253	2.18483	2.75106	0.0596109	0.316277	0.480379	0.463744			-0.835452	0.128168	0.018751	0.158791	0.0934796	0.445647		1.23638	2.93024	-0.11643	1.14213	0.597139	0.454219
-1.252	2.1831	2.75564	0.0543115	0.3172	0.481929	0.463719			-0.828623	0.124669	0.025688	0.158557	0.0939348	0.437041		1.21387	2.92811	-0.124228	1.15244	0.602534	0.436175
-1.251	2.18453	2.76263	0.0562314	0.318627	0.476779	0.461315			-0.818771	0.120681	0.0157287	0.160137	0.0939541	0.444363		1.19265	2.92015	-0.121221	1.1595	0.606004	0.438199
-1.25	2.18553	2.77336	0.0551339	0.317824	0.475837	0.464249			-0.808919	0.117503	0.0292748	0.157852	0.0935664	0.436869		1.17353	2.91079	-0.12275	1.16175	0.607474	0.440488
-1.249	2.18371	2.7815	0.060876	0.320312	0.4758	0.460319			-0.800822	0.113821	0.0301495	0.152982	0.0924859	0.429268		1.15521	2.90151	-0.108931	1.17076	0.610202	0.436043
-1.248	2.17959	2.78685	0.0561987	0.32326	0.470973	0.45924			-0.790385	0.109984	0.044181	0.151039	0.0913578	0.442416		1.13488	2.89149	-0.117108	1.18279	0.607192	0.410122
-1.247	2.17693	2.79574	0.0659495	0.325732	0.466195	0.464266			-0.784434	0.105999	0.0442553	0.152245	0.0899901	0.439033		1.11212	2.8854	-0.13699	1.19244	0.609095	0.423736
-1.246	2.17567	2.80115	0.0619734	0.327537	0.467874	0.47086			-0.77985	0.10295	0.0299304	0.150717	0.0885559	0.440249		1.09123	2.87913	-0.141622	1.19864	0.619562	0.429337
-1.245	2.17606	2.80414	0.0588797	0.331191	0.464226	0.46896			-0.771558	0.100285	0.0338489	0.151125	0.0871664	0.438981		1.07049	2.86944	-0.137971	1.20425	0.619984	0.42318
-1.244	2.17173	2.8164	0.0566404	0.333937	0.464225	0.477017			-0.762584	0.0964696	0.0311719	0.148888	0.0850357	0.442292		1.04959	2.85818	-0.138641	1.21086	0.620702	0.421045
-1.243	2.16572	2.8227	0.0611687	0.335395	0.460372	0.478292			-0.757414	0.092566	0.0272482	0.146846	0.0831489	0.453286		1.02522	2.85941	-0.141644	1.2138	0.63251	0.420223
-1.242	2.15741	2.8333	0.0584241	0.340129	0.453726	0.473179			-0.751658	0.0908474	0.0266222	0.14321	0.0812793	0.463773		0.999242	2.85226	-0.152611	1.22456	0.635493	0.409562
-1.241	2.15256	2.83814	0.0631313	0.344605	0.454654	0.472234			-0.744147	0.0905315	0.0257332	0.144192	0.0794444	0.469901		0.972615	2.84755	-0.148457	1.23338	0.638871	0.413705
-1.24	2.14773	2.8434	0.0602243	0.34648	0.450444	0.47447			-0.736343	0.0915363	0.01122	0.144124	0.0811506	0.471168		0.947602	2.83542	-0.142625	1.23599	0.642765	0.419617
-1.239	2.14356	2.8477	0.0541589	0.351499	0.450697	0.473639			-0.732441	0.0912797	0.0242559	0.142653	0.0808319	0.471075		0.924929	2.82023	-0.160582	1.24129	0.641909	0.414427
-1.238	2.13593	2.85241	0.063079	0.356133	0.446744	0.47471			-0.724443	0.0913841	0.028245	0.139012	0.0835728	0.499182		0.897979	2.81218	-0.167832	1.24588	0.654496	0.422204
-1.237	2.12821	2.86298	0.0693487	0.359707	0.44085	0.473988			-0.71381	0.0919798	0.022561	0.140564	0.0863678	0.496746		0.872482	2.79528	-0.17605	1.25397	0.65983	0.44356
-1.236	2.12134	2.86768	0.0694385	0.363901	0.437052	0.473323			-0.708445	0.095193	0.0335118	0.138841	0.0921775	0.5044		0.846097	2.7893	-0.18437	1.2596	0.665583	0.447981
-1.235	2.11719	2.87448	0.0745087	0.367951	0.437906	0.471846			-0.703665	0.0966843	0.0261626	0.140472	0.0985473	0.503101		0.823827	2.77717	-0.186866	1.26486	0.668163	0.439692
-1.234	2.11321	2.88216	0.07816	0.374236	0.434579	0.468341			-0.693715	0.0957814	0.0263622	0.140147	0.0993934	0.512771		0.799621	2.77126	-0.173675	1.2722	0.680822	0.450611
-1.233	2.10888	2.8841	0.0800077	0.37661	0.429303	0.470678			-0.685619	0.0942937	0.0130964	0.137427	0.101482	0.520798		0.779368	2.76369	-0.176915	1.2749	0.687844	0.448744
-1.232	2.10141	2.89344	0.0820738	0.382594	0.426891	0.466739			-0.681034	0.0930346	0.0235002	0.135676	0.103149	0.52375		0.757421	2.75537	-0.180175	1.28238	0.699663	0.444498
-1.231	2.09328	2.89355	0.0772366	0.38725	0.425868	0.463606			-0.673523	0.0911119	0.00699649	0.136717	0.102471	0.521136		0.733618	2.74786	-0.174885	1.29201	0.704991	0.448745
-1.23	2.08629	2.90381	0.0716838	0.392529	0.420253	0.452044			-0.664158	0.0900726	0.00996932	0.136277	0.103056	0.534304		0.707556	2.72772	-0.172593	1.29973	0.707676	0.45075
-1.229	2.08035	2.91303	0.0626089	0.396582	0.417889	0.457689			-0.663573	0.0886024	-0.00230524	0.135262	0.102889	0.536297		0.685367	2.71091	-0.164771	1.30346	0.707286	0.436457
-1.228	2.07536	2.91628	0.0619895	0.401518	0.417006	0.453975			-0.657427	0.0867139	0.0140738	0.132334	0.102146	0.535717		0.662936	2.69925	-0.173821	1.30623	0.711769	0.429991
-1.227	2.06655	2.91486	0.0669971	0.407872	0.410316	0.4552			-0.650306	0.0847039	0.0154327	0.132724	0.101485	0.539888		0.636551	2.69618	-0.172621	1.31164	0.731666	0.43445
-1.226	2.05425	2.92153	0.0660475	0.412224	0.406341	0.455584			-0.6466	0.0828367	0.013206	0.13071	0.101066	0.537291		0.611135	2.68674	-0.174916	1.31613	0.745007	0.439993
-1.225	2.04355	2.92608	0.0604096	0.418768	0.403914	0.455469			-0.643576	0.0816557	0.0183167	0.129932	0.101308	0.536551		0.581845	2.67136	-0.177509	1.32305	0.748644	0.435865
-1.224	2.03385	2.92935	0.0612138	0.42408	0.40144	0.450912			-0.635869	0.0789468	0.0140359	0.128286	0.100394	0.5361		0.554008	2.66054	-0.182859	1.32524	0.754242	0.442623
-1.223	2.02449	2.93508	0.0546132	0.430941	0.399665	0.450813			-0.630504	0.0783503	0.0151984	0.128716	0.101176	0.533632		0.526332	2.6537	-0.18631	1.32873	0.759863	0.440856
-1.222	2.01531	2.93971	0.0487783	0.436011	0.400001	0.449175			-0.628261	0.0759153	0.00758446	0.12917	0.0995958	0.548217		0.49914	2.63815	-0.192263	1.33268	0.761628	0.457868
-1.221	2.00306	2.94289	0.0513989	0.441072	0.400393	0.45755			-0.621237	0.0748963	0.010673	0.124694	0.0984732	0.552546		0.473482	2.62198	-0.200015	1.33435	0.757981	0.46183
-1.22	1.9904	2.94889	0.0490687	0.445788	0.393866	0.46325			-0.610897	0.0759405	0.0272107	0.125529	0.098505	0.53619		0.444596	2.60427	-0.19456	1.34239	0.757529	0.454831
-1.219	1.98079	2.95579	0.0455436	0.451309	0.390936	0.463209			-0.608263	0.078449	0.0428047	0.125641	0.102632	0.540336		0.415064	2.58506	-0.203363	1.34596	0.754055	0.444617
-1.218	1.97156	2.95822	0.0440157	0.457423	0.387564	0.468339			-0.602313	0.0763216	0.0611831	0.124116	0.103386	0.541581		0.389163	2.58018	-0.204768	1.34718	0.762284	0.447969
-1.217	1.96398	2.96107	0.0460923	0.464751	0.387774	0.467084			-0.59646	0.0760367	0.0653533	0.121306	0.105816	0.541966		0.369556	2.57284	-0.185614	1.34935	0.772405	0.454262
-1.216	1.95419	2.96325	0.0428914	0.469415	0.389435	0.469585			-0.587876	0.0736539	0.0549258	0.12525	0.10669	0.53892		0.345511	2.56218	-0.185834	1.35219	0.774891	0.446567
-1.215	1.94109	2.96436	0.0430226	0.474374	0.383062	0.466296			-0.58534	0.0724683	0.0411575	0.123257	0.107873	0.545979		0.319046	2.54524	-0.186195	1.35779	0.776404	0.44788
-1.214	1.92962	2.96519	0.0402103	0.479406	0.380762	0.464012			-0.580852	0.0700086	0.0486776	0.121448	0.106157	0.537621		0.294194	2.52477	-0.189991	1.36128	0.774326	0.45037
-1.213	1.91994	2.96744	0.0349738	0.486613	0.38135	0.456694			-0.57539	0.067948	0.0477362	0.118841	0.104744	0.521996		0.267164	2.5053	-0.181648	1.36468	0.770604	0.455268
-1.212	1.90962	2.97342	0.0317502	0.492407	0.379725	0.456014			-0.572268	0.0666566	0.0562575	0.121597	0.104186	0.526541		0.242877	2.49543	-0.179332	1.36844	0.770196	0.456241
-1.211	1.89849	2.97768	0.0268831	0.499768	0.379725	0.455197			-0.570512	0.0651341	0.0612765	0.119895	0.1034	0.524086		0.216976	2.48241	-0.186471	1.36806	0.772391	0.464517
-1.21	1.88537	2.98541	0.0249205	0.504677	0.380509	0.46307			-0.564269	0.0633206	0.0630582	0.116615	0.102753	0.5219		0.192689	2.46758	-0.177601	1.37065	0.776568	0.471887
-1.209	1.8685	2.9874	0.0292223	0.509808	0.375882	0.464487			-0.558514	0.0612643	0.0599691	0.118824	0.100631	0.520247		0.162028	2.45585	-0.170247	1.37261	0.782914	0.472193
-1.208	1.85269	2.98765	0.0334074	0.515368	0.37133	0.462796			-0.556563	0.0611356	0.060241	0.120034	0.0998357	0.523251		0.129672	2.43885	-0.163227	1.37678	0.781807	0.459594
-1.207	1.84014	2.98915	0.0295769	0.522346	0.36718	0.456495			-0.555685	0.0630328	0.0608788	0.115459	0.101859	0.515392		0.101754	2.41952	-0.16849	1.37475	0.782891	0.470249
-1.206	1.82748	2.99034	0.0233176	0.529894	0.365382	0.458465			-0.549832	0.0638349	0.0546171	0.115123	0.102988	0.519971		0.0758537	2.39782	-0.166562	1.37346	0.77905	0.453441
-1.205	1.81118	2.99242	0.0288229	0.535651	0.364769	0.463781			-0.544565	0.0641715	0.0646282	0.115012	0.103344	0.517333		0.0461607	2.38142	-0.165675	1.37665	0.779827	0.462586
-1.204	1.79622	2.99168	0.0372476	0.541224	0.362656	0.469718			-0.538419	0.0631815	0.0684356	0.115234	0.104943	0.517285		0.0186462	2.36881	-0.136828	1.37521	0.783655	0.4625
-1.203	1.78053	2.9939	0.0377821	0.547622	0.363441	0.469159			-0.533835	0.063115	0.0654767	0.113612	0.105636	0.527866		-0.00870687	2.35832	-0.137776	1.37841	0.789412	0.46025
-1.202	1.76632	2.99524	0.0375803	0.553115	0.367306	0.46655			-0.529055	0.0631128	0.0618406	0.114783	0.106436	0.534335		-0.0391261	2.3392	-0.133095	1.37911	0.789345	0.459394
-1.201	1.75443	2.99849	0.0382946	0.559652	0.368517	0.472976			-0.524665	0.0607602	0.0535735	0.113739	0.106258	0.532212		-0.0651881	2.32195	-0.129204	1.37884	0.793297	0.445738
-1.2	1.74316	2.99784	0.0402469	0.566149	0.365726	0.47292			-0.520666	0.0605607	0.0473287	0.110583	0.105835	0.523604		-0.0864089	2.30515	-0.115874	1.37886	0.792897	0.452659
-1.199	1.72788	2.99908	0.0350041	0.57182	0.366178	0.467655			-0.514032	0.0599915	0.0447057	0.111512	0.107229	0.526051		-0.110535	2.28915	-0.105703	1.3796	0.793938	0.461177
-1.198	1.71291	2.99667	0.0390025	0.57758	0.364816	0.466761			-0.508862	0.0587139	0.0265849	0.112274	0.107955	0.541047		-0.135548	2.27428	-0.109298	1.38322	0.795852	0.466733
-1.197	1.69583	2.99561	0.039274	0.582326	0.366471	0.466168			-0.508082	0.0589719	0.0251303	0.108853	0.10763	0.532552		-0.163304	2.25721	-0.10212	1.38039	0.790603	0.460252
-1.196	1.68388	2.99861	0.0418058	0.590111	0.374407	0.459912			-0.503985	0.0635587	0.0254659	0.10555	0.112826	0.539527		-0.186058	2.23982	-0.0956417	1.38211	0.791507	0.44851
-1.195	1.6688	2.99946	0.031114	0.596303	0.37663	0.455218			-0.499693	0.0622114	0.0335255	0.110469	0.111731	0.539677		-0.212685	2.23094	-0.0970614	1.38006	0.801965	0.448866
-1.194	1.65346	3.00082	0.0303171	0.601403	0.376039	0.45392			-0.497157	0.0625591	0.0163312	0.108295	0.113162	0.531876		-0.237537	2.21354	-0.113447	1.3774	0.804652	0.449679
-1.193	1.63417	2.99723	0.0251345	0.607776	0.376063	0.461135			-0.494425	0.0637602	-0.0045875	0.105106	0.116511	0.532473		-0.264648	2.19316	-0.112936	1.37741	0.804299	0.460702
-1.192	1.61611	2.99978	0.0302955	0.613234	0.378617	0.464369			-0.487695	0.062807	0.00283633	0.107468	0.115399	0.525033		-0.292485	2.17304	-0.103656	1.3774	0.803934	0.460903
-1.191	1.596	2.99544	0.0234239	0.619199	0.381191	0.453077			-0.487109	0.0615179	-0.00147362	0.107967	0.11422	0.52265		-0.324599	2.15661	-0.0965886	1.3771	0.807888	0.452089
-1.19	1.57931	2.99444	0.0272329	0.626319	0.381691	0.458638			-0.485256	0.0636639	0.00157973	0.103996	0.114734	0.512968		-0.35171	2.13904	-0.096429	1.37203	0.808723	0.461731
-1.189	1.5633	2.9937	0.0293857	0.634507	0.380031	0.465498			-0.481256	0.0630861	-0.00741564	0.101869	0.114378	0.522708		-0.378014	2.12153	-0.0862347	1.3665	0.809056	0.478622
-1.188	1.54335	2.99029	0.0265935	0.639839	0.380326	0.459358			-0.475013	0.0640388	-0.00753724	0.105685	0.116249	0.503169		-0.405286	2.10712	-0.0992534	1.36761	0.813599	0.481386
-1.187	1.52443	2.99156	0.0270133	0.645329	0.38267	0.470814			-0.471014	0.061326	0.00474733	0.104282	0.114836	0.498243		-0.43272	2.09177	-0.0936046	1.36588	0.816516	0.464265
-1.186	1.50537	2.98714	0.0286115	0.651158	0.384636	0.472463			-0.465551	0.0614311	0.00619741	0.101712	0.112479	0.504672		-0.459669	2.07475	-0.0967802	1.36439	0.814783	0.46016
-1.185	1.48922	2.98696	0.0222493	0.65734	0.388071	0.467173			-0.4636	0.0598665	0.00354397	0.101768	0.11099	0.491565		-0.485489	2.05758	-0.103662	1.36227	0.813775	0.46053
-1.184	1.4749	2.98313	0.0220681	0.664594	0.3877	0.464611			-0.457357	0.0620974	0.0106699	0.102585	0.108528	0.505243		-0.511067	2.04323	-0.0965132	1.35936	0.815366	0.469939
-1.183	1.45775	2.98504	0.0259801	0.670737	0.387548	0.465604			-0.453846	0.0618713	0.0130556	0.0989161	0.107734	0.494626		-0.53019	2.02311	-0.0896973	1.35619	0.810807	0.48363
-1.182	1.44042	2.98243	0.0340896	0.676857	0.392486	0.471355			-0.449066	0.0643925	-0.00425366	0.102331	0.107704	0.494946		-0.553025	2.0059	-0.0841469	1.3537	0.806934	0.486919
-1.181	1.42102	2.9759	0.0400873	0.68186	0.393493	0.474571			-0.44253	0.0644305	-0.00864782	0.101321	0.105824	0.490637		-0.578764	1.98796	-0.0662876	1.35453	0.804416	0.493577
-1.18	1.40241	2.97406	0.0288251	0.687598	0.399197	0.480885			-0.441457	0.0661517	-0.0104524	0.0999071	0.10754	0.487996		-0.60289	1.97254	-0.0620459	1.34883	0.803549	0.491784
-1.179	1.3864	2.96787	0.0245861	0.69363	0.397416	0.477159			-0.441067	0.065812	-0.0166648	0.0959491	0.106483	0.492646		-0.625563	1.95692	-0.0587119	1.34665	0.803806	0.486215
-1.178	1.36951	2.96726	0.0253412	0.700123	0.397611	0.483958			-0.437555	0.0658776	-0.0189604	0.0988344	0.104791	0.485434		-0.649204	1.93884	-0.062219	1.34133	0.801484	0.499447
-1.177	1.34901	2.9618	0.0257995	0.705929	0.401716	0.484672			-0.433361	0.0670737	-0.0155668	0.100049	0.104644	0.480069		-0.673088	1.91835	-0.0590458	1.33717	0.795681	0.499768
-1.176	1.32676	2.95424	0.0205754	0.711509	0.406728	0.482139			-0.431019	0.0674914	0.000115566	0.0985787	0.103725	0.477555		-0.699957	1.90042	-0.0386278	1.3324	0.79597	0.504984
-1.175	1.3052	2.94959	0.0237877	0.718345	0.417438	0.476401			-0.426142	0.0692435	0.0222484	0.0973552	0.105032	0.479845		-0.726745	1.88182	-0.0417126	1.32861	0.793303	0.519367
-1.174	1.28406	2.94474	0.0169683	0.723787	0.421006	0.476738			-0.424386	0.0694676	0.0249333	0.0980633	0.104596	0.498703		-0.753695	1.86425	-0.0501337	1.32386	0.792304	0.525906
-1.173	1.26539	2.93942	0.020415	0.731415	0.428082	0.470313			-0.42263	0.0688928	0.014245	0.0959421	0.105549	0.504522		-0.781532	1.84456	-0.0545617	1.31481	0.787995	0.523071
-1.172	1.24585	2.93749	0.0164759	0.73862	0.437835	0.47265			-0.417655	0.0667791	0.0140511	0.0934702	0.105919	0.488702		-0.802753	1.82797	-0.05128	1.30864	0.783676	0.525954
-1.171	1.22374	2.92709	0.0211009	0.743388	0.442964	0.471321			-0.411705	0.0637271	0.0196929	0.0979782	0.104405	0.482399		-0.828815	1.81043	-0.0716344	1.30439	0.779819	0.499372
-1.17	1.20069	2.91812	0.0106031	0.748949	0.446894	0.473938			-0.40751	0.0611794	0.00500859	0.0963436	0.103268	0.481383		-0.855361	1.79163	-0.0810071	1.30071	0.773162	0.493999
-1.169	1.17995	2.90622	0.0158814	0.754652	0.452082	0.480503			-0.404877	0.0583345	0.019377	0.0971369	0.100825	0.474498		-0.881665	1.77684	-0.0948848	1.29557	0.77076	0.488793
-1.168	1.16285	2.89982	0.0158195	0.762307	0.456333	0.47946			-0.402926	0.0557787	0.0185042	0.0956477	0.100159	0.464264		-0.900062	1.76485	-0.098085	1.28802	0.773512	0.477774
-1.167	1.14476	2.89214	0.0181084	0.768167	0.460876	0.474027			-0.395512	0.052155	0.0213094	0.0920274	0.0992136	0.472562		-0.924188	1.75284	-0.105338	1.28269	0.775788	0.486608
-1.166	1.12534	2.88264	0.0213685	0.773778	0.463335	0.468907			-0.392391	0.0490862	0.0298636	0.0941217	0.0983101	0.468377		-0.941051	1.74096	-0.106433	1.27608	0.772616	0.504921
-1.165	1.10368	2.87206	0.0183197	0.77854	0.466509	0.468466			-0.388391	0.0461208	0.0324294	0.0954748	0.0967942	0.46675		-0.959932	1.73059	-0.120341	1.2727	0.77442	0.508388
-1.164	1.08346	2.86288	0.018802	0.78443	0.472509	0.470381			-0.382343	0.0426832	0.0464079	0.094616	0.0952695	0.476202		-0.982686	1.72399	-0.126096	1.26906	0.771566	0.510275
-1.163	1.06408	2.85284	0.0180029	0.789181	0.477238	0.478076			-0.378831	0.0395782	0.03912	0.0924974	0.0943531	0.476837		-1.00584	1.71205	-0.122007	1.26065	0.771072	0.517241
-1.162	1.04468	2.84111	0.0140248	0.796985	0.481524	0.478348			-0.381465	0.0366421	0.0260649	0.0933749	0.0930275	0.469257		-1.02505	1.69824	-0.115444	1.25206	0.768886	0.523746
-1.161	1.0248	2.83262	0.014526	0.804323	0.487613	0.480532			-0.37688	0.0340269	0.0125567	0.0899467	0.0910563	0.461247		-1.04401	1.68464	-0.11615	1.24403	0.771228	0.523663
-1.16	1.00155	2.82739	0.0133031	0.808641	0.492586	0.482915			-0.369174	0.0321787	0.0159034	0.0912613	0.0901629	0.458745		-1.0666	1.67147	-0.112856	1.2378	0.767676	0.526592
-1.159	0.975656	2.81794	0.00983727	0.813111	0.496296	0.487603			-0.37093	0.0307566	0.0111604	0.0911133	0.0906966	0.469116		-1.09065	1.66096	-0.124404	1.22848	0.769941	0.522955
-1.158	0.951609	2.80774	0.00842552	0.821172	0.501664	0.489672			-0.369369	0.0302098	0.00418726	0.0878317	0.0897751	0.473068		-1.11542	1.65749	-0.120092	1.22089	0.782023	0.531747
-1.157	0.929292	2.80056	0.00338848	0.826834	0.506064	0.491309			-0.366638	0.0275658	0.00379849	0.0876611	0.0885921	0.454782		-1.13946	1.6449	-0.111966	1.21142	0.783888	0.530373
-1.156	0.907271	2.78885	0.00727398	0.833471	0.507893	0.495073			-0.35981	0.0251775	0.0126934	0.0860103	0.0874296	0.447243		-1.1623	1.63214	-0.121652	1.20138	0.782285	0.523014
-1.155	0.884954	2.77829	0.0134497	0.839208	0.514865	0.492852			-0.359029	0.0229094	0.00316614	0.0864683	0.0856378	0.443387		-1.18215	1.61822	-0.117109	1.19414	0.77691	0.508587
-1.154	0.860542	2.7666	0.00959711	0.845508	0.521354	0.495916			-0.352006	0.0214892	0.0160314	0.0852645	0.0836453	0.461568		-1.20208	1.60993	-0.108897	1.18621	0.779494	0.511254
-1.153	0.835469	2.75449	0.014365	0.850619	0.527363	0.492331			-0.347519	0.0205132	-0.00119168	0.0858975	0.0817073	0.458451		-1.22556	1.59582	-0.112025	1.17771	0.772769	0.505257
-1.152	0.812469	2.7455	0.0137301	0.85621	0.533673	0.492905			-0.344495	0.0195275	0.00791286	0.0852223	0.0819471	0.453339		-1.24839	1.58323	-0.116356	1.1689	0.774848	0.51022
-1.151	0.792384	2.73309	0.0125745	0.862689	0.537701	0.492182			-0.342153	0.0194001	0.0114404	0.0843827	0.0820355	0.452635		-1.26437	1.56745	-0.129958	1.16073	0.769428	0.504271
-1.15	0.772686	2.71785	0.0151278	0.87033	0.542972	0.498338			-0.334252	0.0179646	0.0315866	0.0791761	0.083059	0.45884		-1.28075	1.55199	-0.117616	1.15261	0.765249	0.510194
-1.149	0.748774	2.70408	0.0129666	0.873988	0.547274	0.499157			-0.331326	0.0165678	0.0472247	0.082533	0.0831492	0.446946		-1.29761	1.53788	-0.117318	1.14393	0.759621	0.53111
-1.148	0.725046	2.68964	0.0219962	0.879701	0.55289	0.490483			-0.328594	0.0153458	0.0382038	0.0818787	0.0825658	0.450897		-1.31092	1.52158	-0.11859	1.13576	0.752132	0.519842
-1.147	0.700975	2.67732	0.0247369	0.884281	0.55868	0.494803			-0.324692	0.0151372	0.0310178	0.0793135	0.0849557	0.456472		-1.33109	1.50924	-0.132958	1.12945	0.754525	0.524133
-1.146	0.679136	2.66405	0.028633	0.89071	0.562362	0.490969			-0.3204	0.0127221	0.0379747	0.0760299	0.0849333	0.464775		-1.34917	1.50127	-0.111174	1.11998	0.757028	0.514096
-1.145	0.656318	2.65509	0.0309466	0.895406	0.571736	0.493008			-0.321278	0.0111069	0.0398244	0.078652	0.0859035	0.472645		-1.36442	1.48913	-0.10442	1.11063	0.75557	0.514508
-1.144	0.632999	2.64482	0.0290428	0.902562	0.576136	0.491947			-0.317864	0.00999905	0.0369254	0.0744674	0.0882158	0.48665		-1.37951	1.47775	-0.0883448	1.09874	0.74987	0.517257
-1.143	0.606606	2.63104	0.023968	0.906553	0.580281	0.496273			-0.311719	0.00894389	0.0467625	0.0731547	0.0882668	0.481668		-1.39734	1.46507	-0.0855799	1.08975	0.743762	0.516886
-1.142	0.578733	2.61677	0.0202892	0.911618	0.584816	0.494012			-0.309377	0.00640376	0.0493643	0.075998	0.0880899	0.472375		-1.418	1.45412	-0.0799585	1.07966	0.744314	0.510746
-1.141	0.552499	2.60401	0.0311642	0.91716	0.590306	0.484789			-0.310451	0.00402109	0.0487836	0.072145	0.0875486	0.476197		-1.43962	1.43999	-0.0822245	1.06961	0.739796	0.506825
-1.14	0.527882	2.58877	0.0230867	0.923992	0.594044	0.483839			-0.307231	0.0021888	0.0375774	0.0707179	0.0876006	0.475057		-1.45705	1.42729	-0.0765023	1.05695	0.736425	0.510528
-1.139	0.502308	2.57457	0.020367	0.929951	0.599762	0.478968			-0.303134	0.000446309	0.0451174	0.0680608	0.0876601	0.485821		-1.47383	1.4129	-0.0744545	1.04687	0.729804	0.518574
-1.138	0.4753	2.55898	0.0150323	0.933827	0.604453	0.477577			-0.299623	-0.00149283	0.0556649	0.0675399	0.0880168	0.485009		-1.49142	1.39934	-0.0969844	1.03771	0.726531	0.516778
-1.137	0.447222	2.5426	0.0177733	0.939745	0.609014	0.47666			-0.294745	-0.00465323	0.054292	0.0677463	0.0873559	0.496842		-1.50707	1.38649	-0.0984078	1.02715	0.723538	0.517044
-1.136	0.420578	2.52382	0.0225316	0.944518	0.609626	0.473966			-0.290453	-0.00706159	0.0530839	0.0654955	0.0863446	0.485177		-1.52652	1.37042	-0.0882296	1.0167	0.716427	0.5181
-1.135	0.395323	2.50736	0.0208759	0.948627	0.613031	0.474765			-0.289088	-0.0108086	0.035179	0.0684465	0.0859008	0.502121		-1.54185	1.35595	-0.0913701	1.00977	0.711711	0.507984
-1.134	0.372733	2.48944	0.0232514	0.953392	0.61652	0.481495			-0.283918	-0.01252	0.031944	0.0663789	0.0845159	0.505095		-1.55371	1.34104	-0.0885473	0.997849	0.703589	0.498782
-1.133	0.348458	2.47011	0.0340781	0.959076	0.618029	0.479202			-0.280698	-0.0150263	0.0251311	0.061337	0.0833801	0.507666		-1.56202	1.32589	-0.0822986	0.987799	0.695595	0.488609
-1.132	0.322588	2.44936	0.0313539	0.962669	0.617787	0.472857			-0.271724	-0.0150904	0.0281494	0.0621135	0.0830368	0.514358		-1.57445	1.31268	-0.0793646	0.979443	0.68808	0.476213
-1.131	0.294738	2.43253	0.0316514	0.965968	0.622697	0.478415			-0.271139	-0.0178002	0.0303672	0.0622254	0.0826904	0.508722		-1.58825	1.29885	-0.0856689	0.96966	0.680417	0.471318
-1.13	0.268845	2.41618	0.0290953	0.970075	0.627266	0.484186			-0.268603	-0.0182628	0.0319667	0.0603924	0.0845474	0.512367		-1.59769	1.2864	-0.0817158	0.960288	0.676664	0.479241
-1.129	0.245253	2.40034	0.0255712	0.974704	0.632763	0.479778			-0.267042	-0.0200655	0.0221262	0.0610937	0.0837906	0.514263		-1.6114	1.2729	-0.0849576	0.951005	0.667338	0.478327
-1.128	0.218928	2.38355	0.0271299	0.978048	0.636416	0.475389			-0.264408	-0.0222317	0.00125861	0.0593231	0.0830778	0.51241		-1.62084	1.25911	-0.0968927	0.941675	0.661553	0.465081
-1.127	0.191487	2.36412	0.0277959	0.982377	0.638562	0.479523			-0.265871	-0.0222787	0.00646855	0.0576418	0.0834335	0.494338		-1.63295	1.24707	-0.099437	0.92959	0.65556	0.452666
-1.126	0.161086	2.34579	0.0176344	0.986018	0.641429	0.482302			-0.25914	-0.0238803	-0.00115998	0.0538073	0.0848723	0.5124		-1.64408	1.23567	-0.112007	0.919574	0.654795	0.442432
-1.125	0.130366	2.32687	0.0153731	0.988878	0.643777	0.480007			-0.258067	-0.0258433	0.0119314	0.0547329	0.0865258	0.51134		-1.65974	1.22268	-0.11021	0.909148	0.652	0.453391
-1.124	0.102174	2.30925	0.00703787	0.99278	0.646043	0.477557			-0.256897	-0.02783	-0.000539931	0.0569566	0.0858529	0.509079		-1.67474	1.21269	-0.107744	0.899336	0.651461	0.45334
-1.123	0.0755756	2.28912	0.000702318	0.996954	0.644048	0.483877			-0.257092	-0.0299323	0.00995949	0.0535943	0.0858834	0.507747		-1.68515	1.20159	-0.109542	0.889426	0.650852	0.459752
-1.122	0.0470873	2.2709	0.00438558	1.00091	0.645203	0.480886			-0.251044	-0.0314596	0.00657007	0.0529667	0.0856316	0.520815		-1.69887	1.19027	-0.104947	0.878438	0.646676	0.45132
-1.121	0.0173465	2.25121	0.00475952	1.00228	0.647018	0.484424			-0.246654	-0.0340304	0.00332126	0.0523844	0.0840792	0.51606		-1.71057	1.17795	-0.105375	0.867858	0.645204	0.457983
-1.12	-0.0120983	2.23403	0.00168136	1.00491	0.650159	0.480622			-0.243045	-0.0362686	-0.000847133	0.0553904	0.0818411	0.526967		-1.72243	1.16637	-0.0996913	0.856542	0.644906	0.449071
-1.119	-0.0416113	2.21443	-0.00181246	1.0075	0.650365	0.481215			-0.243143	-0.0379373	-0.0101323	0.0535372	0.0793546	0.525686		-1.73219	1.15365	-0.100959	0.845846	0.638958	0.441503
-1.118	-0.0668888	2.19473	-0.00469979	1.01073	0.651058	0.480322			-0.23729	-0.0404059	0.0137769	0.0546368	0.077806	0.52261		-1.74292	1.14106	-0.0948003	0.839074	0.63871	0.442105
-1.117	-0.0922573	2.17591	-0.014337	1.01224	0.65175	0.481381			-0.236314	-0.0416356	0.0168132	0.0552133	0.0751272	0.538204		-1.74906	1.12938	-0.0832215	0.830638	0.631004	0.455567
-1.116	-0.119174	2.1584	-0.0134604	1.01544	0.654791	0.488685			-0.234168	-0.0427304	0.00474883	0.0523811	0.0733099	0.522764		-1.75156	1.11814	-0.0939975	0.818914	0.627272	0.462307
-1.115	-0.147776	2.14007	-0.0112962	1.01642	0.65711	0.490319			-0.22773	-0.0419885	0.00573142	0.0509201	0.0724867	0.532658		-1.75914	1.1053	-0.102115	0.813093	0.623068	0.476648
-1.114	-0.176447	2.12413	-0.0058206	1.01568	0.660557	0.487227			-0.225877	-0.0427601	0.00416666	0.054217	0.0737834	0.53694		-1.76414	1.09448	-0.101643	0.802021	0.620026	0.456199
-1.113	-0.203387	2.10775	-0.0073884	1.01722	0.664969	0.494552			-0.226364	-0.0403513	0.00820829	0.0550252	0.0754767	0.552724		-1.7727	1.08225	-0.083342	0.793184	0.615167	0.446631
-1.112	-0.228869	2.08846	-0.00589713	1.01876	0.664518	0.491182			-0.224901	-0.039032	0.00609592	0.0526849	0.0763118	0.554824		-1.77681	1.07033	-0.0892916	0.785891	0.614356	0.461321
-1.111	-0.254784	2.06785	-0.00722261	1.02014	0.664267	0.497276			-0.221585	-0.0369883	0.00238531	0.0515198	0.0804341	0.539629		-1.78165	1.05967	-0.100684	0.779054	0.614455	0.450863
-1.11	-0.285299	2.04887	-0.00603223	1.01992	0.665661	0.503365			-0.221194	-0.0337952	-0.0118625	0.0508565	0.0836819	0.535764		-1.78859	1.04929	-0.107579	0.766043	0.614342	0.462987
-1.109	-0.316406	2.0303	-0.00725835	1.02145	0.666621	0.507604			-0.220317	-0.0308384	-0.00210851	0.0483225	0.0887919	0.537951		-1.79666	1.03567	-0.118948	0.756604	0.609982	0.466843
-1.108	-0.34699	2.01022	-0.0110548	1.02128	0.666145	0.506917			-0.217	-0.030313	-0.00529877	0.0512772	0.091079	0.530818		-1.80634	1.0242	-0.12187	0.747257	0.607496	0.470927
-1.107	-0.375364	1.99152	-0.0074553	1.02068	0.666272	0.51141			-0.216902	-0.0314407	0.00142014	0.0509093	0.0912172	0.53143		-1.8149	1.01143	-0.130558	0.738633	0.605085	0.464785
-1.106	-0.403238	1.97242	-0.00465323	1.02241	0.664414	0.5145			-0.218073	-0.0317574	-0.0138247	0.0517234	0.0924584	0.543877		-1.82176	0.998292	-0.139361	0.729159	0.599708	0.470473
-1.105	-0.431521	1.95394	-0.00543681	1.02294	0.664085	0.513074			-0.215439	-0.0336397	-0.00104371	0.0504949	0.0917797	0.537593		-1.82466	0.985971	-0.141744	0.71963	0.592986	0.454473
-1.104	-0.462651	1.93629	-0.0042801	1.02185	0.664355	0.505453			-0.209586	-0.0354389	-0.0112371	0.0504766	0.0914354	0.549932		-1.83321	0.974956	-0.154603	0.712154	0.588521	0.460868
-1.103	-0.493075	1.91965	-0.00404559	1.01898	0.665764	0.504095			-0.205977	-0.035513	0.000724173	0.0533615	0.0910987	0.541269		-1.83975	0.962851	-0.147208	0.702572	0.584403	0.469319
-1.102	-0.520857	1.89981	0.00147784	1.01965	0.664678	0.502443			-0.20744	-0.0362211	0.0105433	0.0525448	0.091371	0.5444		-1.84532	0.951295	-0.149188	0.693313	0.581829	0.468673
-1.101	-0.544928	1.88089	0.000244628	1.01816	0.663603	0.500504			-0.204026	-0.0373651	0.00603913	0.0504505	0.0900663	0.544019		-1.84749	0.940718	-0.150594	0.68538	0.579083	0.480983
-1.1	-0.570387	1.86331	-0.00183513	1.01643	0.664309	0.494179			-0.199051	-0.0378772	0.0133802	0.0530206	0.0888054	0.542456		-1.8483	0.930159	-0.140928	0.680347	0.57462	0.46914
-1.099	-0.598306	1.84479	0.00162108	1.01449	0.663666	0.491714			-0.200027	-0.0380044	0.018981	0.0514859	0.0882924	0.531742		-1.84693	0.917724	-0.14435	0.670332	0.568506	0.476007
-1.098	-0.626499	1.82511	0.00803942	1.01232	0.660403	0.486923			-0.197588	-0.0391615	0.0161688	0.0490589	0.0873472	0.521441		-1.84798	0.906992	-0.137388	0.662586	0.568643	0.476579
-1.097	-0.653416	1.80588	0.0131944	1.00774	0.655629	0.478037			-0.193393	-0.0392763	0.0146466	0.0514904	0.0885199	0.511661		-1.84927	0.897592	-0.12864	0.656957	0.56798	0.478339
-1.096	-0.68056	1.78889	0.0133383	1.00492	0.655662	0.477814			-0.194369	-0.0398951	0.0165892	0.0515626	0.0878399	0.512717		-1.85266	0.886686	-0.126453	0.648505	0.566857	0.469881
-1.095	-0.704471	1.77235	0.0222656	1.00397	0.655535	0.467174			-0.196515	-0.040931	0.0251775	0.0497924	0.0882205	0.516277		-1.85169	0.876933	-0.114298	0.64327	0.569605	0.463579
-1.094	-0.73107	1.75612	0.0132472	1.00007	0.654869	0.469463			-0.193101	-0.0398183	0.00685621	0.0500885	0.0876159	0.512107		-1.84975	0.868512	-0.114631	0.636868	0.574106	0.456145
-1.093	-0.760492	1.73809	0.00590943	0.995879	0.652572	0.476126			-0.192125	-0.0383073	0.00963382	0.0520069	0.090997	0.539796		-1.85298	0.857935	-0.130004	0.627902	0.569539	0.449059
-1.092	-0.790779	1.7202	0.00757447	0.993281	0.650657	0.474423			-0.194466	-0.0378458	-0.0112755	0.0520932	0.0920401	0.536894		-1.8579	0.848192	-0.136311	0.617841	0.563604	0.445488
-1.091	-0.817924	1.70395	0.0140567	0.989796	0.652866	0.47302			-0.193686	-0.0370703	-0.0288731	0.0472137	0.0926424	0.547392		-1.86274	0.83666	-0.130446	0.611856	0.559147	0.446501
-1.09	-0.84393	1.68658	0.0157814	0.985782	0.650312	0.475923			-0.191735	-0.0386349	-0.0245441	0.0520257	0.0933539	0.570669		-1.86468	0.82866	-0.133876	0.604064	0.552099	0.433541
-1.089	-0.871257	1.67054	0.00704473	0.982552	0.648095	0.476963			-0.192028	-0.0385579	-0.0270126	0.0500428	0.0939817	0.573723		-1.86549	0.817258	-0.138954	0.601169	0.546825	0.427269
-1.088	-0.898561	1.6532	0.00831642	0.978934	0.643722	0.477834			-0.192223	-0.0404011	-0.032527	0.0503996	0.0930489	0.570011		-1.86742	0.80712	-0.136802	0.593531	0.540735	0.426832
-1.087	-0.9273	1.63607	0.0150883	0.972952	0.640502	0.477498			-0.18598	-0.0419596	-0.0165848	0.0493408	0.0911684	0.577095		-1.86839	0.796509	-0.141823	0.586363	0.534917	0.410455
-1.086	-0.954627	1.6218	0.0220977	0.966309	0.640123	0.475666			-0.185492	-0.0423068	-0.0213427	0.0506086	0.0909789	0.58326		-1.87275	0.790019	-0.13646	0.577982	0.531373	0.40986
-1.085	-0.978925	1.60672	0.0192524	0.962718	0.637235	0.47532			-0.184809	-0.0431216	-0.0351235	0.0504245	0.090958	0.591712		-1.87017	0.782704	-0.138737	0.572465	0.530272	0.404224
-1.084	-1.00063	1.58986	0.022303	0.957583	0.634178	0.477873			-0.18198	-0.044237	-0.028231	0.0485918	0.0909827	0.60124		-1.86759	0.774904	-0.139621	0.56859	0.52935	0.392122
-1.083	-1.02445	1.57337	0.0244596	0.952145	0.630969	0.479112			-0.178664	-0.0461201	-0.0276263	0.0495927	0.0901417	0.613183		-1.86508	0.766553	-0.140576	0.564896	0.529201	0.399252
-1.082	-1.05013	1.55897	0.017718	0.945731	0.627532	0.484446			-0.18042	-0.0461973	-0.0250603	0.0528628	0.0898324	0.615505		-1.85952	0.758098	-0.130016	0.560225	0.527955	0.416785
-1.081	-1.07646	1.54426	0.0191502	0.938028	0.623969	0.485751			-0.176615	-0.0460454	-0.0191788	0.0490778	0.0908218	0.617198		-1.85815	0.750222	-0.133635	0.55159	0.531569	0.417502
-1.08	-1.09898	1.53088	0.0218976	0.931694	0.623197	0.48442			-0.176225	-0.0430396	-0.0231661	0.0493279	0.0934449	0.617052		-1.85451	0.741216	-0.143866	0.55069	0.526697	0.422463
-1.079	-1.12189	1.51749	0.0196982	0.923641	0.621189	0.483288			-0.174664	-0.0444485	-0.0200155	0.0503752	0.0920294	0.624154		-1.8525	0.731928	-0.148738	0.54476	0.529201	0.432742
-1.078	-1.14362	1.50372	0.0229847	0.919607	0.62157	0.486872			-0.179444	-0.0432768	-0.0203744	0.048654	0.093857	0.615963		-1.84838	0.721122	-0.162935	0.541808	0.524355	0.427714
-1.077	-1.16878	1.49101	0.0239377	0.912366	0.619538	0.486096			-0.176615	-0.0428713	-0.0162494	0.047795	0.0933556	0.617633		-1.84354	0.712066	-0.158714	0.536966	0.517822	0.422429
-1.076	-1.19426	1.47742	0.021397	0.90433	0.619885	0.478227			-0.171933	-0.0422716	-0.00437355	0.0528423	0.0929415	0.618898		-1.84346	0.704044	-0.158821	0.532899	0.51571	0.423311
-1.075	-1.221	1.463	0.0196693	0.897071	0.615429	0.475893			-0.175932	-0.0416286	-0.00568971	0.0543005	0.0946698	0.621701		-1.84467	0.694965	-0.157848	0.526597	0.512418	0.441478
-1.074	-1.24498	1.44901	0.0191236	0.890597	0.612019	0.471458			-0.17681	-0.0432688	0.00548894	0.0493723	0.0939046	0.606761		-1.84443	0.684514	-0.155584	0.522817	0.507268	0.440257
-1.073	-1.26574	1.43627	0.0151718	0.883473	0.60934	0.468691			-0.175152	-0.0425609	0.0153965	0.0494597	0.092937	0.605573		-1.84177	0.678138	-0.168616	0.521848	0.507489	0.424803
-1.072	-1.28858	1.42249	0.0151532	0.87607	0.606816	0.471597			-0.173494	-0.0409815	0.0162222	0.0524244	0.0936665	0.620121		-1.83999	0.670855	-0.176031	0.519399	0.505208	0.413755
-1.071	-1.31213	1.40807	0.016916	0.868467	0.603039	0.475023			-0.171835	-0.040657	0.00832476	0.0506416	0.0934581	0.627466		-1.83749	0.662566	-0.171281	0.516796	0.500889	0.417828
-1.07	-1.33729	1.39436	0.0204726	0.86124	0.597652	0.470005			-0.168616	-0.039026	0.0114533	0.0496556	0.0952272	0.611699		-1.8345	0.653542	-0.180332	0.511267	0.494627	0.420024
-1.069	-1.35881	1.3804	0.0179002	0.852165	0.593085	0.478568			-0.167836	-0.0364344	0.0281537	0.0511578	0.0962094	0.597291		-1.83442	0.644275	-0.176913	0.509298	0.490126	0.431311
-1.068	-1.37899	1.36622	0.00901077	0.843695	0.586694	0.483802			-0.167153	-0.0370957	0.0336203	0.049233	0.0960641	0.601241		-1.8316	0.634746	-0.154298	0.507064	0.486596	0.424783
-1.067	-1.39532	1.35248	0.0103845	0.836314	0.58311	0.487178			-0.165202	-0.0366285	0.0499714	0.0483005	0.0974351	0.613621		-1.82095	0.625558	-0.138336	0.504311	0.48269	0.42459
-1.066	-1.41461	1.33948	0.0159068	0.827527	0.578961	0.488994			-0.162763	-0.0362404	0.0529518	0.0514444	0.0971795	0.617379		-1.81304	0.616271	-0.137861	0.504097	0.479447	0.425041
-1.065	-1.43661	1.32687	0.0181946	0.817083	0.573103	0.489251			-0.161983	-0.0363063	0.0357869	0.0504643	0.0951815	0.616075		-1.8082	0.607405	-0.135805	0.499493	0.475601	0.41386
-1.064	-1.45642	1.31302	0.0176902	0.808715	0.567534	0.488117			-0.162081	-0.034195	0.0300585	0.0487878	0.0950862	0.608274		-1.80344	0.598474	-0.129539	0.497247	0.470394	0.422961
-1.063	-1.47423	1.30003	0.00830925	0.798676	0.5639	0.482643			-0.161203	-0.0340174	0.0221369	0.0447965	0.0941864	0.615562		-1.79626	0.589375	-0.122659	0.494904	0.465441	0.408153
-1.062	-1.4913	1.28648	0.00816906	0.790043	0.56072	0.486146			-0.160812	-0.0308214	0.0173902	0.0496949	0.0954425	0.621215		-1.79126	0.581445	-0.117941	0.495246	0.465237	0.421728
-1.061	-1.50925	1.27339	0.00825466	0.781451	0.556005	0.493559			-0.162081	-0.0327434	0.0190033	0.0477961	0.0947235	0.625665		-1.78456	0.573103	-0.120936	0.493866	0.462291	0.420452
-1.06	-1.52863	1.26066	0.0163718	0.773837	0.54888	0.503029			-0.161495	-0.0314526	0.0265033	0.0498129	0.0934971	0.596963		-1.7777	0.564396	-0.0999733	0.491054	0.456877	0.427915
-1.059	-1.55038	1.24626	0.017045	0.764433	0.543545	0.501462			-0.159544	-0.032097	0.0279047	0.0480595	0.0929899	0.602663		-1.77641	0.555381	-0.0964125	0.488413	0.451624	0.41868
-1.058	-1.57058	1.23297	0.013751	0.753602	0.538043	0.50485			-0.158471	-0.0309527	0.0302486	0.0495838	0.0909033	0.605838		-1.77431	0.546313	-0.0956443	0.485316	0.447708	0.41898
-1.057	-1.58756	1.2196	0.0208575	0.745654	0.533304	0.499608			-0.161495	-0.0308371	0.0306682	0.0476073	0.0880109	0.605886		-1.77076	0.538368	-0.0781308	0.485464	0.444358	0.406927
-1.056	-1.60332	1.20654	0.0093113	0.737629	0.528316	0.498962			-0.159642	-0.028542	0.0354882	0.0469673	0.0893555	0.601216		-1.7635	0.530149	-0.0925327	0.484659	0.438444	0.400524
-1.055	-1.6212	1.1943	0.0126406	0.728854	0.524687	0.500651			-0.157008	-0.0280505	0.0310926	0.0501733	0.0869978	0.568251		-1.76124	0.525196	-0.0891458	0.48391	0.432842	0.414873
-1.054	-1.6403	1.18112	0.00470128	0.717596	0.519079	0.494647			-0.15613	-0.0256197	0.0370641	0.0494122	0.0894401	0.554375		-1.75737	0.517465	-0.0705525	0.481481	0.427718	0.436791
-1.053	-1.65793	1.16975	0.00661115	0.709559	0.515041	0.492988			-0.153301	-0.0256129	0.0322058	0.0489325	0.0897157	0.548855		-1.75269	0.51059	-0.0664003	0.478028	0.422489	0.452396
-1.052	-1.6731	1.15867	0.0114851	0.699548	0.510966	0.493151			-0.152423	-0.0259857	0.0238884	0.0467039	0.0885424	0.549197		-1.74849	0.504131	-0.0592867	0.478935	0.417491	0.444736
-1.051	-1.68494	1.14799	0.00984603	0.690483	0.507275	0.495695			-0.148619	-0.0245478	0.0449137	0.0463262	0.088913	0.54241		-1.74115	0.498318	-0.0713983	0.477321	0.415444	0.448007
-1.05	-1.69664	1.13674	0.0162599	0.68193	0.501535	0.497429			-0.149497	-0.0249728	0.0501967	0.0481874	0.0886465	0.526276		-1.73074	0.491001	-0.0601509	0.479993	0.411896	0.449566
-1.049	-1.7096	1.12505	0.0167161	0.673201	0.497714	0.501232			-0.147253	-0.0260382	0.0522637	0.0504657	0.0890339	0.51285		-1.71985	0.485209	-0.056759	0.475617	0.409839	0.450575
-1.048	-1.72447	1.11347	0.0144375	0.660454	0.493134	0.496368			-0.144229	-0.0227194	0.0590305	0.0495579	0.0891874	0.503047		-1.71347	0.478432	-0.0448792	0.473366	0.405686	0.457539
-1.047	-1.739	1.10089	0.0141694	0.651455	0.490012	0.493965			-0.143059	-0.0230348	0.0572959	0.0454839	0.089124	0.49404		-1.70581	0.471671	-0.0516527	0.470397	0.401735	0.4551
-1.046	-1.75016	1.08884	0.0181623	0.641615	0.48559	0.49135			-0.144815	-0.0239622	0.0584133	0.0476913	0.0898384	0.497419		-1.69742	0.468258	-0.0592581	0.468279	0.405159	0.439998
-1.045	-1.76009	1.0767	0.0119242	0.632669	0.479973	0.489852			-0.143254	-0.0239543	0.0679096	0.0497734	0.0902609	0.488976		-1.68919	0.462864	-0.0694157	0.470855	0.406418	0.434684
-1.044	-1.77266	1.06388	0.00908451	0.623885	0.476075	0.489227			-0.141205	-0.0261057	0.0532416	0.047891	0.0900669	0.484753		-1.68209	0.458877	-0.0747646	0.470665	0.403884	0.432942
-1.043	-1.78584	1.05205	0.0119167	0.614781	0.473717	0.493485			-0.142474	-0.0282602	0.0558368	0.0489732	0.0886912	0.473026		-1.67547	0.454153	-0.0803932	0.468268	0.399776	0.417649
-1.042	-1.80106	1.04026	0.00564695	0.605598	0.469955	0.494196			-0.141303	-0.0300782	0.0571446	0.0475605	0.0882219	0.458901		-1.67039	0.450009	-0.0970879	0.465092	0.394986	0.423776
-1.041	-1.81306	1.02847	0.0130725	0.594473	0.466726	0.497887			-0.141108	-0.0320992	0.0372695	0.047584	0.0877422	0.467735		-1.6678	0.444966	-0.0902038	0.464938	0.39031	0.405988
-1.04	-1.82321	1.01718	0.0152633	0.587027	0.464174	0.494946			-0.140718	-0.0348278	0.0380202	0.0459691	0.0863183	0.465715		-1.66232	0.443121	-0.0857465	0.465735	0.386774	0.414273
-1.039	-1.83262	1.0061	0.0202654	0.580149	0.460743	0.495978			-0.143351	-0.036758	0.0241174	0.0489647	0.0855885	0.475183		-1.65562	0.439491	-0.0853551	0.464819	0.382729	0.412922
-1.038	-1.84521	0.995118	0.0208098	0.571826	0.456708	0.492097			-0.137596	-0.0394632	0.0076553	0.0504101	0.0852169	0.456928		-1.649	0.436773	-0.0772935	0.465136	0.380623	0.411959
-1.037	-1.85662	0.983785	0.0189917	0.562353	0.452499	0.495976			-0.134767	-0.04169	-0.00112017	0.0486369	0.0841496	0.453401		-1.64473	0.433688	-0.059336	0.463249	0.377446	0.412683
-1.036	-1.8665	0.973353	0.0278028	0.552702	0.450074	0.491444			-0.134377	-0.0440196	-0.000532395	0.0495649	0.0832762	0.459134		-1.6394	0.431479	-0.0711213	0.460034	0.377588	0.408479
-1.035	-1.87363	0.961579	0.02761	0.545632	0.445606	0.485384			-0.133499	-0.0452696	0.00364149	0.0490831	0.0820978	0.462635		-1.63045	0.427766	-0.0841852	0.459804	0.373476	0.423006
-1.034	-1.8775	0.951562	0.0234838	0.536053	0.440638	0.481093			-0.129402	-0.0467287	-0.00299211	0.0487347	0.0813876	0.465195		-1.62141	0.426341	-0.0760974	0.461418	0.370623	0.443922
-1.033	-1.88351	0.940612	0.0235343	0.529675	0.435748	0.489849			-0.126281	-0.0480184	-0.0111185	0.0472002	0.0813464	0.460992		-1.61124	0.428328	-0.0805897	0.461759	0.3698	0.446226
-1.032	-1.89089	0.930269	0.0233946	0.522016	0.431855	0.491612			-0.127354	-0.0477895	-0.00440107	0.0515041	0.0805866	0.449345		-1.59938	0.426003	-0.088589	0.457895	0.367287	0.440158
-1.031	-1.89927	0.920295	0.0227223	0.510954	0.429522	0.486728			-0.122281	-0.0499518	0.0116348	0.0471566	0.0797834	0.452493		-1.59067	0.425434	-0.103024	0.456084	0.364771	0.444265
-1.03	-1.90476	0.910534	0.0220468	0.502393	0.426542	0.491156			-0.122866	-0.0511472	0.0105874	0.0484016	0.0787371	0.452044		-1.58276	0.421826	-0.107589	0.454119	0.361148	0.44286
-1.029	-1.90945	0.902128	0.0176967	0.496311	0.424089	0.486685			-0.124622	-0.0532089	0.00861768	0.0497274	0.0776553	0.444763		-1.57485	0.421814	-0.112443	0.454731	0.357494	0.440817
-1.028	-1.91271	0.892519	0.00978652	0.489353	0.423242	0.489194			-0.122866	-0.0542841	0.0172558	0.0511705	0.0760497	0.463222		-1.56283	0.418349	-0.105409	0.455087	0.354267	0.442561
-1.027	-1.91836	0.883161	0.00992673	0.482703	0.420002	0.484424			-0.119355	-0.0549075	0.0308814	0.0469143	0.0749057	0.460301		-1.5542	0.414122	-0.109354	0.45491	0.349883	0.447073
-1.026	-1.92587	0.873546	0.00889309	0.474997	0.416555	0.489698			-0.120623	-0.0544001	0.01975	0.0479168	0.0771952	0.450491		-1.5504	0.410288	-0.118096	0.454372	0.344778	0.455461
-1.025	-1.9337	0.863652	0.0074988	0.468043	0.412054	0.486295			-0.121989	-0.055293	0.0179864	0.0481258	0.077635	0.450196		-1.5454	0.405408	-0.118422	0.451634	0.339416	0.448352
-1.024	-1.93737	0.854084	0.00473712	0.461292	0.407892	0.488269			-0.119257	-0.0564464	0.0175985	0.0475448	0.0785198	0.462564		-1.54056	0.400352	-0.119437	0.452358	0.336204	0.456514
-1.023	-1.94097	0.844711	-0.00265006	0.455429	0.403479	0.487025			-0.118379	-0.0568935	0.024476	0.0444997	0.0778085	0.458629		-1.53499	0.398135	-0.11938	0.453554	0.333116	0.464886
-1.022	-1.94546	0.836462	-0.0102098	0.450668	0.400763	0.485374			-0.118867	-0.0576938	0.0245243	0.0456972	0.077427	0.459839		-1.52725	0.395247	-0.128037	0.454288	0.328822	0.465105
-1.021	-1.94935	0.82763	-0.00910294	0.446304	0.396476	0.488371			-0.114575	-0.0573338	0.0276732	0.04563	0.0790916	0.474511		-1.51861	0.394278	-0.130948	0.45381	0.322219	0.455162
-1.02	-1.95481	0.81895	-0.00947501	0.438363	0.391489	0.490964			-0.111844	-0.0596711	0.0226854	0.0458888	0.07838	0.46667		-1.51401	0.392262	-0.124682	0.451151	0.318073	0.447921
-1.019	-1.95773	0.810308	-0.00843476	0.433332	0.386479	0.501684			-0.110283	-0.0608761	0.013871	0.0470732	0.0780965	0.449821		-1.50804	0.38991	-0.121567	0.450459	0.313299	0.455065
-1.018	-1.95696	0.802386	-0.024547	0.428178	0.381793	0.497412			-0.111258	-0.060079	0.00169561	0.0465882	0.0790843	0.445338		-1.49884	0.387124	-0.139257	0.452839	0.309094	0.452689
-1.017	-1.95543	0.793271	-0.030404	0.424043	0.378082	0.491663			-0.107844	-0.0610878	0.00945979	0.0423116	0.0782688	0.447752		-1.48634	0.381791	-0.132419	0.451742	0.305736	0.4597
-1.016	-1.95468	0.786103	-0.0190372	0.419942	0.375935	0.498931			-0.101699	-0.0638259	-0.000740949	0.043292	0.0780874	0.432851		-1.47649	0.379284	-0.132425	0.453118	0.301413	0.463322
-1.015	-1.95787	0.777155	-0.0220324	0.415869	0.371917	0.505806			-0.103357	-0.0661513	0.00540447	0.0446663	0.0777573	0.429129		-1.46496	0.375845	-0.130253	0.449368	0.298508	0.472084
-1.014	-1.95885	0.769081	-0.027099	0.409796	0.368951	0.500196			-0.101308	-0.068359	0.018685	0.0428739	0.0768631	0.408709		-1.45648	0.374534	-0.132525	0.445207	0.295904	0.466534
-1.013	-1.95737	0.760611	-0.0253802	0.405488	0.364738	0.499338			-0.0974065	-0.0703148	0.0303484	0.0423347	0.0756939	0.397712		-1.44817	0.371294	-0.126707	0.447126	0.292172	0.468391
-1.012	-1.95497	0.752916	-0.0305201	0.402616	0.364039	0.495653			-0.101113	-0.0711004	0.0308653	0.0444815	0.0754594	0.404832		-1.43857	0.368328	-0.127721	0.44645	0.288249	0.467231
-1.011	-1.95308	0.74491	-0.0327118	0.39994	0.361853	0.495185			-0.099455	-0.0733337	0.0277331	0.0410897	0.0741109	0.417607		-1.42744	0.363728	-0.146087	0.447884	0.283509	0.463656
-1.01	-1.95475	0.736016	-0.0346293	0.397197	0.357732	0.495054			-0.0954556	-0.0748871	0.029513	0.0410667	0.0729929	0.419533		-1.41961	0.35801	-0.135867	0.447212	0.280673	0.469725
-1.009	-1.95666	0.727438	-0.0267264	0.394151	0.353121	0.495397			-0.0948703	-0.0772345	0.0180786	0.0391121	0.0725531	0.423676		-1.41259	0.356251	-0.132124	0.447258	0.277939	0.46715
-1.008	-1.95873	0.717958	-0.0267876	0.390013	0.348616	0.495491			-0.0980894	-0.0783508	0.00978894	0.0388424	0.0722138	0.43094		-1.40977	0.350758	-0.132786	0.445238	0.274374	0.468242
-1.007	-1.955	0.710029	-0.0253829	0.388251	0.344799	0.488615			-0.0976992	-0.0794081	-0.0052646	0.0392725	0.0730608	0.426776		-1.40299	0.347295	-0.118007	0.44675	0.269434	0.456901
-1.006	-1.95247	0.70093	-0.0302873	0.38636	0.340711	0.489805			-0.094285	-0.081049	0.0025615	0.0404684	0.0740508	0.415763		-1.39686	0.344449	-0.120289	0.448434	0.274339	0.448417
-1.005	-1.95215	0.692014	-0.037021	0.385504	0.337261	0.491651			-0.0943826	-0.0830518	0.0213905	0.0364428	0.0739405	0.416145		-1.38774	0.341153	-0.10874	0.447347	0.272967	0.449166
-1.004	-1.95115	0.683231	-0.041143	0.383893	0.33405	0.488278			-0.0886272	-0.0836919	0.0218217	0.0394761	0.0761614	0.414983		-1.38185	0.334495	-0.104948	0.447166	0.269821	0.458636
-1.003	-1.95088	0.675144	-0.0402437	0.381884	0.332039	0.488029			-0.0862861	-0.0848313	0.0309357	0.037343	0.0754094	0.399229		-1.37507	0.329766	-0.0913699	0.445902	0.267237	0.429165
-1.002	-1.94819	0.666002	-0.0467102	0.379366	0.328538	0.494845			-0.0847253	-0.0865308	0.0417825	0.0393759	0.075038	0.405729		-1.36974	0.325852	-0.0836204	0.443122	0.263308	0.428625
-1.001	-1.94029	0.657211	-0.0445983	0.379295	0.330436	0.491706			-0.0864812	-0.0863343	0.037284	0.0412158	0.0763891	0.406254		-1.35788	0.322442	-0.0904419	0.446239	0.257638	0.42206
-1	-1.93471	0.648433	-0.0408235	0.378627	0.329809	0.495497			-0.0840425	-0.0874346	0.0320784	0.0371378	0.0780466	0.397388		-1.34417	0.317166	-0.0966291	0.446073	0.25388	0.425827
-0.999	-1.92958	0.64015	-0.0348719	0.378617	0.330281	0.492671			-0.0803357	-0.0888001	0.0374962	0.036607	0.0793631	0.407732		-1.33497	0.313323	-0.0971611	0.444948	0.249828	0.430459
-0.998	-1.92797	0.630765	-0.0261559	0.378551	0.3271	0.496457			-0.0774093	-0.0903153	0.02232	0.0387515	0.0789742	0.413269		-1.32295	0.309402	-0.0924748	0.440345	0.245981	0.426516
-0.997	-1.92309	0.622599	-0.0277123	0.376846	0.324303	0.492128			-0.0781896	-0.0924593	0.023995	0.036828	0.0786344	0.426517		-1.31423	0.306193	-0.0956236	0.43888	0.242938	0.433043
-0.996	-1.91612	0.614821	-0.0298183	0.37624	0.322056	0.493182			-0.0788725	-0.0954507	0.0295131	0.0375858	0.0772004	0.442261		-1.30471	0.301898	-0.0990591	0.43895	0.240841	0.447875
-0.995	-1.90968	0.606615	-0.0265028	0.375735	0.322143	0.491362			-0.0777019	-0.0974457	0.0329446	0.0391192	0.0759045	0.438487		-1.29583	0.297488	-0.0923948	0.439221	0.237968	0.43637
-0.994	-1.90396	0.598227	-0.0202867	0.378412	0.319429	0.490878			-0.0786774	-0.0989659	0.0266362	0.03605	0.0740295	0.447853		-1.28373	0.292658	-0.0802555	0.442118	0.234304	0.443066
-0.993	-1.90166	0.589376	-0.0233066	0.378303	0.31628	0.494993			-0.0758485	-0.100174	0.0134162	0.0349355	0.0722414	0.433575		-1.27445	0.288405	-0.0720943	0.44171	0.230657	0.448087
-0.992	-1.89998	0.580362	-0.0218704	0.377585	0.313378	0.490721			-0.0741902	-0.101504	0.000631183	0.035995	0.0708879	0.421318		-1.26864	0.286087	-0.0556672	0.43809	0.228017	0.442457
-0.991	-1.89524	0.572683	-0.0169759	0.377525	0.315512	0.487909			-0.0746779	-0.102378	0.0113375	0.0374101	0.0694677	0.410428		-1.26477	0.283577	-0.0490534	0.437761	0.228184	0.446348
-0.99	-1.88941	0.564941	-0.0232775	0.37828	0.314351	0.483015			-0.0772142	-0.103091	0.00711879	0.0400521	0.0683664	0.420514		-1.25589	0.279806	-0.0520902	0.439881	0.227604	0.432087
-0.989	-1.88135	0.556749	-0.0210488	0.378203	0.313921	0.49004			-0.0746779	-0.102157	0.00871177	0.0371149	0.0687677	0.42007		-1.24678	0.276646	-0.0733506	0.441851	0.226899	0.432051
-0.988	-1.87839	0.549391	-0.0176526	0.380784	0.310453	0.4885			-0.0726294	-0.100487	0.00558403	0.0363151	0.0731856	0.42148		-1.24	0.273799	-0.0707517	0.43984	0.228247	0.441795
-0.987	-1.87363	0.541585	-0.0144308	0.381005	0.307664	0.490369			-0.0700932	-0.0992188	0.0100019	0.0377594	0.0755825	0.414306		-1.23217	0.268138	-0.0629529	0.440459	0.227783	0.457663
-0.986	-1.86844	0.534408	-0.015995	0.381278	0.305823	0.488501			-0.0703858	-0.0979146	-0.00183007	0.0382613	0.0772264	0.401127		-1.22531	0.263627	-0.0668553	0.438467	0.226386	0.461323
-0.985	-1.85967	0.526309	-0.0165286	0.380692	0.30267	0.479999			-0.0700932	-0.096047	-0.00138113	0.0383378	0.082719	0.406172		-1.21789	0.258739	-0.0664746	0.435689	0.224028	0.448394
-0.984	-1.84999	0.51846	-0.0075348	0.382412	0.299668	0.479975			-0.0682398	-0.0922416	-0.0130471	0.0410055	0.0870918	0.396569		-1.20522	0.253961	-0.0574667	0.437193	0.222694	0.460144
-0.983	-1.84009	0.510866	-0.00557634	0.38591	0.29723	0.483548			-0.0669717	-0.0911319	-0.0103914	0.0397774	0.0894969	0.402992		-1.19151	0.248958	-0.0763803	0.438808	0.220537	0.457996
-0.982	-1.8328	0.503159	-0.00334918	0.385699	0.294548	0.473501			-0.0647281	-0.0902932	-0.00784252	0.0388926	0.091344	0.409811		-1.17851	0.245312	-0.0736622	0.436047	0.221577	0.447596
-0.981	-1.82672	0.495209	0.00545791	0.387028	0.291968	0.472921			-0.0618992	-0.0906305	-0.0207572	0.0389755	0.0923615	0.415854		-1.17093	0.240105	-0.0648297	0.430536	0.220831	0.441781
-0.98	-1.81843	0.487337	0.00373284	0.387842	0.289426	0.474765			-0.06346	-0.0911195	-0.0163814	0.0389487	0.0935353	0.414004		-1.15891	0.236781	-0.0593235	0.430302	0.224462	0.433762
-0.979	-1.80798	0.479588	0.00556856	0.38908	0.290043	0.475533			-0.066679	-0.0920751	0.000787842	0.0380809	0.0923832	0.406913		-1.14713	0.232226	-0.0651847	0.430223	0.223677	0.420513
-0.978	-1.79835	0.471201	0.0097947	0.390327	0.287841	0.474131			-0.0628747	-0.0936774	0.00531452	0.0383383	0.0912347	0.423311		-1.13672	0.227453	-0.0536277	0.428225	0.223655	0.414324
-0.977	-1.79129	0.462705	0.0077629	0.392047	0.284505	0.476018			-0.0646305	-0.0926549	0.00178589	0.0395797	0.090459	0.40859		-1.12808	0.223403	-0.0576255	0.431698	0.224025	0.420329
-0.976	-1.78571	0.454826	0.00984735	0.393353	0.281384	0.479083			-0.0657036	-0.0927998	0.0279344	0.0367821	0.0897049	0.402514		-1.11977	0.220853	-0.0635281	0.429727	0.222468	0.420086
-0.975	-1.77965	0.447873	0.00188532	0.393918	0.280333	0.478311			-0.06346	-0.0935299	0.0314101	0.0363174	0.0898399	0.407161		-1.113	0.218469	-0.0608882	0.427269	0.223717	0.427225
-0.974	-1.7732	0.440907	0.00430131	0.394234	0.278766	0.480332			-0.0651183	-0.0931587	0.0119285	0.0409708	0.0896163	0.406988		-1.10727	0.213967	-0.0561843	0.426184	0.221091	0.430598
-0.973	-1.7638	0.433468	0.0142372	0.395012	0.27572	0.482492			-0.0665815	-0.092465	0.00883467	0.0412143	0.0900219	0.400465		-1.09855	0.210113	-0.0669297	0.4292	0.219711	0.42125
-0.972	-1.75465	0.426497	0.00729511	0.396308	0.27411	0.477518			-0.0664839	-0.09276	0.016904	0.0387363	0.0892302	0.397674		-1.08823	0.20477	-0.0692558	0.430388	0.217754	0.433402
-0.971	-1.7474	0.419447	0.00229509	0.398249	0.272448	0.490872			-0.0618017	-0.0915469	0.0183016	0.0390621	0.090751	0.39272		-1.08387	0.200152	-0.0692321	0.427853	0.214764	0.45755
-0.97	-1.74012	0.412869	0.00154012	0.399183	0.270122	0.486859			-0.0605335	-0.0921902	0.0147593	0.0409003	0.0904546	0.404037		-1.07572	0.195301	-0.0602307	0.428134	0.211722	0.449776
-0.969	-1.73283	0.407049	-0.000802795	0.399424	0.277011	0.495004			-0.062582	-0.0912396	0.012344	0.0383057	0.0907066	0.41642		-1.06902	0.190579	-0.0603599	0.426019	0.208998	0.447915
-0.968	-1.72024	0.401215	0.00301408	0.399544	0.276356	0.490165			-0.0632649	-0.0899748	0.0134291	0.0387974	0.0919846	0.419532		-1.05894	0.186163	-0.0492903	0.426353	0.206071	0.447714
-0.967	-1.70723	0.395034	0.00393941	0.400534	0.274967	0.494219			-0.0585826	-0.0878942	0.0125563	0.0406696	0.095995	0.422567		-1.04619	0.184135	-0.0510822	0.426028	0.202478	0.44695
-0.966	-1.69696	0.389675	0.004158	0.402983	0.271956	0.500332			-0.0600458	-0.0869127	0.0177244	0.0392353	0.0978875	0.434157		-1.03425	0.180445	-0.0528316	0.427504	0.19988	0.439688
-0.965	-1.6882	0.384788	0.00606312	0.403165	0.272737	0.500999			-0.0587777	-0.0863773	-0.00404844	0.039368	0.0996755	0.42558		-1.0219	0.178206	-0.0403287	0.421018	0.197567	0.430166
-0.964	-1.67915	0.380159	0.00706552	0.405179	0.271647	0.497946			-0.0579973	-0.0866148	-0.00967586	0.0385466	0.10019	0.424252		-1.0106	0.174505	-0.0394836	0.417417	0.195058	0.428234
-0.963	-1.66788	0.375692	0.00884261	0.405828	0.271087	0.494375			-0.0578997	-0.0857941	-0.0183591	0.0395514	0.101066	0.437087		-1.00213	0.1718	-0.0490113	0.418406	0.193135	0.433595
-0.962	-1.65647	0.3715	0.00581717	0.406117	0.274719	0.493889			-0.0630698	-0.0871474	-0.00800759	0.0375401	0.099805	0.438628		-0.990432	0.167698	-0.0273132	0.419634	0.190774	0.429302
-0.961	-1.64465	0.368511	0.0101551	0.407547	0.275389	0.493403			-0.0603384	-0.087983	-0.0143487	0.0408371	0.0978463	0.42205		-0.978813	0.166235	-0.0234946	0.418201	0.188352	0.445658
-0.96	-1.63703	0.364787	0.00418876	0.408313	0.275624	0.49283			-0.0601433	-0.0872595	-0.0174362	0.0422081	0.09633	0.419572		-0.969534	0.162266	-0.0168325	0.416763	0.186394	0.441665
-0.959	-1.63167	0.362128	0.00805281	0.409742	0.273498	0.505152			-0.0618017	-0.0868275	-0.018024	0.0406534	0.0961584	0.419975		-0.965742	0.160703	-0.0288607	0.416548	0.187175	0.435128
-0.958	-1.62366	0.357836	0.0092603	0.408844	0.272151	0.498769			-0.0638502	-0.0876681	-0.00915339	0.0387153	0.0946901	0.424657		-0.959851	0.157794	-0.0303772	0.41532	0.185393	0.437229
-0.957	-1.61359	0.354294	0.00833257	0.409738	0.270545	0.493675			-0.0622894	-0.0888387	-0.0245869	0.0428655	0.0936546	0.420934		-0.953396	0.154057	-0.0442729	0.416995	0.18404	0.428852
-0.956	-1.60319	0.350539	0.000194017	0.408043	0.26876	0.495049			-0.0643379	-0.0872803	-0.0194498	0.0421283	0.0943724	0.414216		-0.945812	0.150497	-0.0406101	0.415691	0.182886	0.430461
-0.955	-1.59478	0.349286	-0.00141394	0.409334	0.267587	0.485507			-0.0639477	-0.0873589	-0.011792	0.0422557	0.0933117	0.42009		-0.937017	0.147336	-0.0512232	0.415977	0.181263	0.419702
-0.954	-1.58658	0.345816	-0.0078916	0.409418	0.266473	0.482304			-0.0609237	-0.0838544	0.00359732	0.0416651	0.0950746	0.418191		-0.930643	0.143491	-0.0471483	0.41616	0.179425	0.420737
-0.953	-1.57855	0.342843	-0.0137372	0.410371	0.264293	0.486922			-0.0565341	-0.0840499	0.00597242	0.042989	0.0930949	0.400045		-0.923703	0.139479	-0.0545247	0.413939	0.177077	0.431177
-0.952	-1.56966	0.340416	-0.0107881	0.4105	0.261916	0.490737			-0.0600458	-0.082743	-0.0070401	0.0413085	0.0937897	0.415418		-0.918297	0.135088	-0.0484747	0.412109	0.175149	0.429837
-0.951	-1.55516	0.33764	-0.0103004	0.409553	0.260042	0.486202			-0.0597532	-0.0821027	9.42848e-05	0.0415549	0.0940569	0.414926		-0.906356	0.13159	-0.0556514	0.410932	0.173547	0.427397
-0.95	-1.54188	0.335142	-0.00931306	0.410031	0.258558	0.481032			-0.0580948	-0.0806262	-0.00942413	0.0383675	0.0950547	0.433526		-0.898045	0.128459	-0.0636958	0.411773	0.173069	0.420548
-0.949	-1.5315	0.333519	-0.00423557	0.411784	0.260937	0.480985			-0.0566316	-0.0806226	-0.000931073	0.0418073	0.0961511	0.429277		-0.885861	0.123721	-0.0674668	0.408592	0.171041	0.420427
-0.948	-1.52319	0.332965	0.0008478	0.411326	0.26211	0.473207			-0.0591679	-0.082032	-0.0027084	0.0393494	0.0947712	0.44093		-0.876421	0.120057	-0.0612764	0.407613	0.169184	0.418185
-0.947	-1.51289	0.331831	0.00512684	0.411895	0.264325	0.472505			-0.0556561	-0.0826794	6.49445e-05	0.0379019	0.0944034	0.436559		-0.866093	0.119262	-0.0697191	0.40122	0.167898	0.423517
-0.946	-1.50089	0.331529	0.00796222	0.412424	0.263593	0.472532			-0.0564365	-0.0809177	-0.00226624	0.0405311	0.094956	0.449669		-0.857298	0.116392	-0.0820065	0.401191	0.166825	0.411223
-0.945	-1.48928	0.330274	0.00640713	0.411998	0.262818	0.468624			-0.0601433	-0.0800935	0.00133848	0.0408998	0.0947726	0.442659		-0.848341	0.113374	-0.0972968	0.40117	0.165929	0.421258
-0.944	-1.47757	0.328961	0.0125247	0.411422	0.261954	0.476945			-0.0601433	-0.0779192	-0.0143484	0.0389712	0.0963428	0.43605		-0.836803	0.110353	-0.100202	0.399169	0.165242	0.426563
-0.943	-1.46997	0.326105	0.00703454	0.411883	0.25986	0.482005			-0.0579973	-0.0749187	-0.025238	0.0451789	0.0963277	0.441081		-0.831397	0.107678	-0.100466	0.398431	0.164673	0.416906
-0.942	-1.46477	0.324295	0.00256064	0.41156	0.257686	0.48234			-0.0610213	-0.0744046	-0.0322758	0.0433239	0.0978553	0.446821		-0.827524	0.103742	-0.0964718	0.395708	0.164126	0.42293
-0.941	-1.4568	0.322066	0.00418684	0.411193	0.255937	0.478291			-0.0622894	-0.0742211	-0.046093	0.0399424	0.0985152	0.443294		-0.823651	0.0999954	-0.0896157	0.394237	0.164551	0.413042
-0.94	-1.44594	0.318908	-0.00065389	0.410323	0.255281	0.48271			-0.0637526	-0.0734719	-0.0465464	0.0414837	0.0980739	0.4419		-0.816792	0.0972262	-0.0926372	0.394969	0.164644	0.418985
-0.939	-1.43563	0.316756	0.0028394	0.408857	0.256535	0.476212			-0.0605335	-0.0735246	-0.0765043	0.0417925	0.0957776	0.444745		-0.808724	0.093211	-0.0916512	0.395537	0.163549	0.423405
-0.938	-1.42768	0.313739	-0.00579401	0.407842	0.255091	0.471336			-0.0609237	-0.072209	-0.0527798	0.0406589	0.09582	0.436104		-0.804286	0.0892487	-0.0914919	0.394729	0.162266	0.417291
-0.937	-1.42007	0.310945	-0.0095742	0.407465	0.251479	0.472438			-0.0597532	-0.0702549	-0.054676	0.040482	0.0944748	0.436481		-0.797024	0.0847917	-0.0858174	0.394039	0.159989	0.416196
-0.936	-1.41187	0.309116	-0.0169962	0.407826	0.251206	0.47707			-0.057412	-0.068836	-0.0503464	0.0400702	0.093794	0.444472		-0.793797	0.0810906	-0.0800912	0.389494	0.157391	0.413799
-0.935	-1.40108	0.307151	-0.021298	0.407044	0.249275	0.476946			-0.0561439	-0.0699797	-0.0315247	0.0400511	0.0929659	0.462712		-0.786615	0.0771081	-0.0818466	0.389483	0.15489	0.407937
-0.934	-1.38723	0.304028	-0.0119807	0.405251	0.24634	0.478556			-0.0575096	-0.0681719	-0.0355801	0.0393275	0.091701	0.470355		-0.776207	0.0740448	-0.0745003	0.389229	0.15292	0.400446
-0.933	-1.37567	0.301058	-0.0144487	0.4048	0.244229	0.479468			-0.0547782	-0.0688638	-0.0347612	0.0400906	0.0903269	0.468678		-0.764507	0.0710832	-0.0802544	0.38517	0.151147	0.40225
-0.932	-1.36603	0.297915	-0.0177766	0.403621	0.242579	0.473594			-0.0536076	-0.0673968	-0.0281439	0.0407412	0.0887587	0.466782		-0.757648	0.0674865	-0.0865477	0.381648	0.148913	0.402404
-0.931	-1.35727	0.295371	-0.0199255	0.404122	0.239809	0.477341			-0.0526322	-0.0668194	-0.00979493	0.0374274	0.0886235	0.461153		-0.750871	0.0643539	-0.10054	0.379753	0.14685	0.406177
-0.93	-1.34738	0.292518	-0.0242024	0.403775	0.237101	0.472664			-0.0548758	-0.0648716	-0.00334008	0.037846	0.0888378	0.454413		-0.74135	0.0625376	-0.0968905	0.375534	0.146158	0.413055
-0.929	-1.33468	0.289647	-0.0205315	0.402716	0.233087	0.47475			-0.0536077	-0.0643971	0.00918761	0.0388548	0.0865203	0.446963		-0.733604	0.0606	-0.101369	0.372774	0.144309	0.411873
-0.928	-1.32422	0.286635	-0.0189173	0.401926	0.229775	0.472327			-0.056339	-0.0596735	0.00863827	0.0375537	0.088288	0.44281		-0.725293	0.0594012	-0.110311	0.37071	0.143856	0.408327
-0.927	-1.31452	0.283593	-0.0280791	0.400781	0.2274	0.474291			-0.0565341	-0.0601983	0.00435465	0.039978	0.0876734	0.440109		-0.716901	0.0581986	-0.111406	0.371003	0.144323	0.409766
-0.926	-1.30724	0.281614	-0.0241187	0.399335	0.225044	0.474959			-0.056339	-0.0601614	0.0190265	0.0390408	0.086482	0.456552		-0.712867	0.05558	-0.117964	0.370192	0.143392	0.400585
-0.925	-1.30131	0.278687	-0.021937	0.398051	0.222642	0.474861			-0.0528273	-0.0586685	0.0160168	0.0418264	0.0873336	0.448279		-0.709478	0.052949	-0.107991	0.366436	0.142181	0.412913
-0.924	-1.29375	0.27657	-0.0320209	0.397095	0.220869	0.478528			-0.0578022	-0.0583671	0.0186806	0.0394467	0.0871081	0.455026		-0.70617	0.0514197	-0.109542	0.365176	0.141572	0.401385
-0.923	-1.28282	0.273968	-0.0349524	0.392994	0.21783	0.47578			-0.0577047	-0.0572153	0.0242649	0.0397832	0.0894296	0.454639		-0.701167	0.0507687	-0.115716	0.366791	0.144501	0.409782
-0.922	-1.27369	0.272692	-0.0385599	0.391693	0.215997	0.470685			-0.0566316	-0.0559601	0.0165383	0.0396624	0.0885487	0.44764		-0.695842	0.0483525	-0.109822	0.362987	0.142935	0.429712
-0.921	-1.26545	0.271084	-0.0357852	0.390187	0.214488	0.472321			-0.0540954	-0.0569703	0.0152823	0.0408206	0.0897265	0.451038		-0.690759	0.0461798	-0.107584	0.362954	0.141368	0.42712
-0.92	-1.25868	0.269291	-0.030465	0.388052	0.21249	0.475679			-0.0536076	-0.0579154	0.021204	0.040582	0.0896223	0.478936		-0.686886	0.0457093	-0.103969	0.359824	0.141421	0.431219
-0.919	-1.25058	0.266413	-0.0266704	0.386904	0.209718	0.469866			-0.0536076	-0.0576632	0.0153122	0.0407888	0.0898782	0.474857		-0.68269	0.0442857	-0.10496	0.357782	0.139573	0.443816
-0.918	-1.23871	0.263373	-0.0253533	0.385629	0.207136	0.467868			-0.0499008	-0.0601521	0.0253193	0.0400007	0.08881	0.476898		-0.6768	0.0444928	-0.0972046	0.353144	0.138499	0.441603
-0.917	-1.22514	0.260306	-0.0280517	0.38261	0.204431	0.472974			-0.0495107	-0.0626038	0.0358174	0.0411564	0.0870012	0.475295		-0.665987	0.0451475	-0.0962433	0.354364	0.139298	0.442749
-0.916	-1.21489	0.257327	-0.0331297	0.380466	0.2022	0.473035			-0.0491205	-0.0633857	0.0188654	0.04166	0.0873691	0.452595		-0.654288	0.0439826	-0.0864381	0.352242	0.138121	0.437012
-0.915	-1.20562	0.254304	-0.0309912	0.3788	0.20012	0.480249			-0.0448284	-0.0651523	0.017162	0.0445968	0.0865889	0.454817		-0.649608	0.0457262	-0.0964209	0.346977	0.137343	0.443428
-0.914	-1.19636	0.250494	-0.0228922	0.379177	0.19765	0.474563			-0.0448284	-0.0675989	0.0134863	0.0385906	0.085554	0.451914		-0.644363	0.0462607	-0.110148	0.342778	0.136756	0.452597
-0.913	-1.18524	0.246422	-0.0282067	0.375624	0.195082	0.478292			-0.0472671	-0.0699454	0.0104469	0.0451571	0.0852181	0.459353		-0.636214	0.048645	-0.0965461	0.341543	0.138509	0.454583
-0.912	-1.17374	0.242164	-0.0346848	0.374407	0.192584	0.474393			-0.0474622	-0.0725317	0.00121829	0.0431187	0.0839573	0.454438		-0.629678	0.0492684	-0.0816475	0.336435	0.138733	0.456233
-0.911	-1.16281	0.238074	-0.0322741	0.372296	0.190748	0.472931			-0.0450235	-0.0748495	0.000915609	0.044082	0.0821528	0.441092		-0.621851	0.0513427	-0.080961	0.333397	0.142393	0.45416
-0.91	-1.15425	0.234677	-0.0288535	0.37068	0.189158	0.476506			-0.0490229	-0.0769021	0.00268407	0.042143	0.0796999	0.438631		-0.617656	0.0515827	-0.0862683	0.335126	0.14373	0.462123
-0.909	-1.14865	0.230837	-0.0217578	0.367129	0.187597	0.487619			-0.048145	-0.0784981	-0.00105792	0.0427944	0.0781611	0.45858		-0.613783	0.0532469	-0.0889649	0.331466	0.145817	0.467583
-0.908	-1.14036	0.228063	-0.0183988	0.365152	0.185457	0.490656			-0.047072	-0.0783769	-0.00342445	0.0441711	0.0782115	0.457528		-0.611846	0.0566023	-0.0884521	0.329907	0.147112	0.470495
-0.907	-1.13182	0.224707	-0.0235278	0.363189	0.18427	0.485623			-0.0454137	-0.078942	0.00573244	0.0430763	0.0779616	0.455767		-0.610232	0.0579314	-0.091203	0.326506	0.146272	0.462958
-0.906	-1.1215	0.221223	-0.0244619	0.359601	0.181843	0.483786			-0.0500959	-0.0798271	0.000648072	0.0414809	0.0774135	0.457778		-0.605553	0.0593954	-0.0939197	0.329964	0.1467	0.467269
-0.905	-1.11333	0.217771	-0.0220461	0.355898	0.179595	0.485671			-0.046194	-0.0807328	-0.00767117	0.0436265	0.076346	0.446042		-0.599824	0.0609071	-0.0812729	0.324481	0.146261	0.481039
-0.904	-1.10538	0.215153	-0.0223149	0.354139	0.180403	0.494977			-0.0439504	-0.0819515	-0.00653439	0.042057	0.0763024	0.461082		-0.597403	0.0616763	-0.0835022	0.32321	0.145283	0.483096
-0.903	-1.09796	0.211521	-0.0217586	0.352514	0.17805	0.486655			-0.0412191	-0.0838199	-0.0170533	0.0427852	0.0752815	0.459184		-0.596273	0.0627064	-0.0933586	0.321429	0.145035	0.473205
-0.902	-1.08762	0.208898	-0.0216288	0.348902	0.175654	0.493703			-0.0418044	-0.0846271	-0.0167844	0.0436289	0.0728037	0.468328		-0.592078	0.0609391	-0.0793751	0.31884	0.142919	0.455224
-0.901	-1.07637	0.205226	-0.0172199	0.347165	0.173495	0.497925			-0.0390731	-0.0841038	-0.0196447	0.0424185	0.0717779	0.48438		-0.583444	0.060465	-0.0845189	0.314048	0.140291	0.452706
-0.9	-1.06273	0.202638	-0.0259489	0.344432	0.171633	0.493062			-0.0357564	-0.0842988	-0.0236755	0.0412818	0.0725787	0.481664		-0.575859	0.0592874	-0.0829823	0.315499	0.138849	0.455216
-0.899	-1.05253	0.199971	-0.029835	0.34168	0.16879	0.495697			-0.0377074	-0.0846971	-0.0245058	0.0421565	0.0739094	0.478828		-0.567226	0.0587739	-0.0853125	0.315688	0.135842	0.467628
-0.898	-1.04292	0.197473	-0.0252725	0.339445	0.166688	0.497829			-0.0336104	-0.0857733	-0.0247843	0.0431592	0.0737283	0.467883		-0.561658	0.0574517	-0.102353	0.306055	0.134733	0.469163
-0.897	-1.03469	0.194746	-0.0211401	0.339666	0.164143	0.48848			-0.0319521	-0.0861523	-0.0281359	0.0406764	0.0734056	0.466072		-0.556898	0.059288	-0.10827	0.30488	0.135135	0.460518
-0.896	-1.0221	0.192058	-0.0269763	0.337132	0.162778	0.481942			-0.0355614	-0.0859831	-0.0220439	0.0426001	0.075311	0.467559		-0.551573	0.0602241	-0.10027	0.302098	0.132433	0.452416
-0.895	-1.01087	0.189244	-0.0296602	0.333115	0.160769	0.482646			-0.0357564	-0.086307	-0.0312873	0.0440133	0.0755575	0.472854		-0.544714	0.061566	-0.0968685	0.302675	0.131499	0.44503
-0.894	-0.999466	0.187979	-0.0286737	0.331065	0.159656	0.478676			-0.031757	-0.0883459	-0.0443784	0.0418259	0.0749456	0.471441		-0.539873	0.0602428	-0.0922877	0.298878	0.130491	0.457072
-0.893	-0.992315	0.186738	-0.0184718	0.32922	0.158078	0.479565			-0.0340006	-0.0893967	-0.0399552	0.0406299	0.075455	0.460131		-0.536081	0.0604187	-0.098574	0.297554	0.128902	0.452393
-0.892	-0.986576	0.184448	-0.0147112	0.32709	0.15678	0.486553			-0.0352687	-0.0893539	-0.0375067	0.0398291	0.0761121	0.449693		-0.533499	0.0581164	-0.10635	0.294976	0.128197	0.445754
-0.891	-0.978242	0.182765	-0.00825092	0.323425	0.154453	0.491775			-0.0354638	-0.0901785	-0.0471241	0.0413072	0.0764958	0.455		-0.533014	0.0578519	-0.103972	0.290009	0.126235	0.437041
-0.89	-0.968176	0.181348	-0.0103975	0.321735	0.151426	0.492101			-0.0333178	-0.092085	-0.0437005	0.0401551	0.0755502	0.46549		-0.531239	0.0579189	-0.10822	0.290042	0.126945	0.44728
-0.889	-0.958202	0.178927	-0.0134655	0.318551	0.149337	0.49694			-0.0334153	-0.0938302	-0.048983	0.0379021	0.0752268	0.461124		-0.529868	0.0578675	-0.0975737	0.289725	0.125635	0.43807
-0.888	-0.951006	0.178278	-0.0124331	0.315226	0.147932	0.499735			-0.0316595	-0.094697	-0.0487852	0.0390178	0.074289	0.458419		-0.523977	0.0566899	-0.101718	0.289738	0.125065	0.433556
-0.887	-0.943218	0.177075	-0.0140049	0.313631	0.145401	0.507418			-0.0294159	-0.0968844	-0.0243958	0.0367271	0.073186	0.430593		-0.52196	0.0574149	-0.107785	0.284725	0.123918	0.427376
-0.886	-0.935543	0.174596	-0.00931731	0.313091	0.143787	0.512939			-0.025514	-0.0976063	-0.032527	0.0380344	0.0737607	0.433605		-0.522848	0.0554173	-0.0904669	0.282554	0.121309	0.414864
-0.885	-0.925068	0.173013	-0.00646338	0.310039	0.142774	0.506809			-0.0248311	-0.0993345	-0.041271	0.0395899	0.0722567	0.443489		-0.516958	0.0539195	-0.0896912	0.280651	0.118449	0.429609
-0.884	-0.911815	0.170933	-0.00690845	0.30725	0.141725	0.506664			-0.024636	-0.100856	-0.0616957	0.039917	0.0726082	0.455724		-0.510583	0.0524479	-0.0790105	0.279189	0.117006	0.426321
-0.883	-0.901362	0.168168	-0.00748015	0.306118	0.139912	0.502619			-0.020539	-0.103265	-0.0691666	0.0365676	0.0719437	0.466061		-0.504209	0.0503412	-0.063149	0.277551	0.114625	0.419711
-0.882	-0.891934	0.16521	0.00222289	0.304729	0.139447	0.502385			-0.0203439	-0.10385	-0.0880141	0.036315	0.0714437	0.469171		-0.495737	0.0481071	-0.0656646	0.273823	0.112354	0.41067
-0.881	-0.88426	0.162952	0.00718578	0.302264	0.137919	0.502477			-0.0189783	-0.104385	-0.0841319	0.035627	0.0731251	0.480767		-0.490573	0.0463233	-0.0508646	0.269919	0.111411	0.415002
-0.88	-0.873147	0.160235	0.0060483	0.301529	0.136413	0.496904			-0.0179052	-0.105492	-0.0827098	0.0376823	0.0735629	0.484781		-0.486538	0.0444546	-0.0512526	0.266327	0.10999	0.41957
-0.879	-0.86299	0.156735	-0.00137241	0.300284	0.13476	0.49319			-0.0187832	-0.106881	-0.0718296	0.0382769	0.0745976	0.488859		-0.482181	0.0413969	-0.0583338	0.265009	0.108158	0.409812
-0.878	-0.851513	0.153961	-0.00157046	0.296341	0.132733	0.492758			-0.0193685	-0.107663	-0.0678777	0.0372473	0.0769578	0.49088		-0.475323	0.0399249	-0.0649808	0.26445	0.105587	0.405222
-0.877	-0.842199	0.150899	0.00297418	0.294265	0.131989	0.498773			-0.0171249	-0.109215	-0.0718753	0.0363984	0.0774042	0.48969		-0.469594	0.0383327	-0.0662317	0.261305	0.103653	0.408258
-0.876	-0.836893	0.14779	0.00904244	0.294174	0.130714	0.490877			-0.0159543	-0.109081	-0.0555181	0.0323803	0.0811755	0.495123		-0.467415	0.0375521	-0.0721903	0.259062	0.100329	0.40616
-0.875	-0.831974	0.144505	0.0078474	0.292061	0.129276	0.492601			-0.0179052	-0.111324	-0.0563221	0.0345649	0.0818384	0.50268		-0.469271	0.0344573	-0.0648418	0.255723	0.0980458	0.401499
-0.874	-0.822888	0.140769	0.0095458	0.289406	0.128308	0.489151			-0.0202464	-0.112133	-0.0447606	0.0344467	0.0833851	0.48509		-0.468626	0.033321	-0.0798568	0.255564	0.0964098	0.379875
-0.873	-0.812891	0.137664	0.0106198	0.287195	0.126762	0.492478			-0.0186856	-0.113809	-0.0273865	0.0369631	0.0836878	0.48477		-0.464672	0.031825	-0.0873154	0.255957	0.0944754	0.381229
-0.872	-0.804852	0.134397	0.00240113	0.284923	0.125015	0.489089			-0.0179052	-0.115168	-0.0282938	0.0339032	0.0832646	0.492927		-0.462816	0.0322865	-0.0849502	0.249632	0.0937012	0.389896
-0.871	-0.798043	0.130415	0.00161037	0.284257	0.123198	0.492075			-0.0154666	-0.116845	-0.0275653	0.0356314	0.082957	0.502464		-0.456281	0.0293245	-0.0641899	0.250132	0.092378	0.399198
-0.87	-0.792532	0.126613	-0.00403724	0.28137	0.121678	0.497663			-0.015369	-0.119056	-0.0286919	0.0356335	0.0814763	0.520241		-0.455877	0.0277733	-0.0601575	0.248991	0.0902829	0.396888
-0.869	-0.784448	0.123324	-0.0122003	0.281926	0.120351	0.49409			-0.0110769	-0.120626	-0.0232576	0.0349083	0.0792337	0.529949		-0.455312	0.0267381	-0.06497	0.243075	0.0887535	0.394468
-0.868	-0.774451	0.120174	-0.0218592	0.279517	0.119272	0.490235			-0.0117598	-0.121201	-0.0154541	0.0367938	0.0779432	0.532399		-0.449826	0.0242368	-0.075932	0.243309	0.0872114	0.390524
-0.867	-0.762359	0.118004	-0.0172464	0.278541	0.118981	0.486099			-0.0102965	-0.122505	-0.00481872	0.0386756	0.0760711	0.546357		-0.440627	0.0231069	-0.0795714	0.242162	0.0873691	0.392491
-0.866	-0.753569	0.114769	-0.0217864	0.276098	0.118752	0.48047			-0.00776031	-0.123294	0.0111239	0.0378072	0.0742697	0.556438		-0.434495	0.0230301	-0.0775669	0.239013	0.0897548	0.390043
-0.865	-0.746145	0.111512	-0.0169332	0.276014	0.118054	0.483044			-0.00668728	-0.124746	-3.28225e-05	0.0377648	0.0727716	0.551026		-0.427798	0.021217	-0.0673626	0.234342	0.0909	0.38392
-0.864	-0.738721	0.107769	-0.0143983	0.274419	0.117596	0.479549			-0.00746766	-0.125349	-0.00425797	0.0350863	0.0714212	0.530724		-0.423844	0.0212708	-0.07972	0.232068	0.0931277	0.389023
-0.863	-0.729134	0.104569	-0.0123259	0.273242	0.116584	0.482643			-0.00756521	-0.124749	0.00609066	0.0373918	0.0708904	0.530258		-0.417309	0.0214236	-0.0913538	0.230491	0.0957311	0.396567
-0.862	-0.718773	0.100872	-0.0106354	0.272148	0.115467	0.485806			-0.00912597	-0.122233	0.0230791	0.0356262	0.0759666	0.536537		-0.414323	0.0183898	-0.0979367	0.226429	0.0956053	0.403187
-0.861	-0.710825	0.0971259	-0.012287	0.270944	0.114446	0.483648			-0.00912597	-0.121611	0.0204867	0.0380337	0.0757454	0.529273		-0.408433	0.0163893	-0.0946863	0.226894	0.0961866	0.398083
-0.86	-0.703902	0.0934561	-0.0157912	0.268017	0.114062	0.484396			-0.00932107	-0.119195	0.016868	0.0360893	0.0796707	0.52641		-0.400929	0.013693	-0.0906619	0.225939	0.0964116	0.399025
-0.859	-0.69912	0.0904465	-0.0046806	0.268353	0.1139	0.490988			-0.00629709	-0.118035	0.013762	0.0344302	0.0817319	0.520819		-0.400768	0.0111927	-0.0991467	0.220185	0.0954481	0.405208
-0.858	-0.694975	0.0871468	-0.00179806	0.267623	0.112876	0.488995			-0.0106867	-0.114004	0.0101531	0.036675	0.0859736	0.539704		-0.401171	0.00919544	-0.107058	0.218961	0.0955079	0.410777
-0.857	-0.6868	0.0843305	0.00355952	0.264447	0.113192	0.487625			-0.0120524	-0.111957	0.00385708	0.0380265	0.0901602	0.536246		-0.399799	0.00809131	-0.1006	0.218804	0.095696	0.406283
-0.856	-0.678784	0.08086	-0.00504262	0.261177	0.113052	0.485858			-0.0131254	-0.111728	0.00327545	0.0375374	0.0921035	0.523573		-0.397056	0.00574003	-0.0907811	0.221078	0.0976465	0.389578
-0.855	-0.671634	0.0770218	-0.00221303	0.261611	0.112471	0.48412			-0.00766275	-0.110499	0.0199543	0.0352366	0.0942643	0.53336		-0.392537	0.00400081	-0.0943174	0.215268	0.10075	0.385653
-0.854	-0.667056	0.0735516	-0.00497474	0.260189	0.111747	0.48622			-0.00746766	-0.110577	0.0106815	0.0387502	0.0946684	0.515778		-0.390197	0.00227721	-0.0822764	0.215114	0.102897	0.386506
-0.853	-0.662547	0.0701161	-0.0136547	0.258937	0.111524	0.4851			-0.00854068	-0.111687	-0.000814317	0.0381979	0.0946105	0.521677		-0.387615	-1.85029e-06	-0.0813784	0.213075	0.103059	0.386891
-0.852	-0.654577	0.0661816	-0.0133382	0.258451	0.111049	0.484494			-0.00863823	-0.110901	0.00154178	0.0368337	0.0958852	0.529891		-0.38584	-0.000893595	-0.0665461	0.209806	0.104166	0.393914
-0.851	-0.645218	0.0623198	-0.0131176	0.256263	0.110658	0.482086			-0.00649218	-0.111779	-0.00152154	0.036413	0.0952996	0.526821		-0.380676	-0.00111124	-0.0707703	0.209423	0.108131	0.40025
-0.85	-0.635312	0.0585218	-0.013164	0.254517	0.109712	0.483213			-0.00727257	-0.111901	5.56932e-05	0.0398012	0.0956699	0.528269		-0.370832	-0.00300433	-0.0747384	0.211106	0.110927	0.387477
-0.849	-0.627842	0.0548797	-0.012664	0.253313	0.10887	0.475921			-0.00366331	-0.112619	0.00766803	0.0377839	0.0952532	0.517794		-0.364942	-0.00460496	-0.0654447	0.205375	0.112438	0.388814
-0.848	-0.622263	0.0509171	-0.00624061	0.254566	0.107634	0.471047			-0.00259028	-0.111232	-0.0142506	0.0391241	0.0961392	0.513354		-0.357519	-0.00652433	-0.0545766	0.198564	0.111786	0.382456
-0.847	-0.616092	0.0471069	-0.00442463	0.253569	0.106423	0.466953			-0.00278538	-0.111451	-0.0276026	0.0371497	0.0947312	0.503895		-0.355179	-0.00904317	-0.0498289	0.199603	0.111202	0.370553
-0.846	-0.60655	0.0436918	-0.0151397	0.251136	0.105437	0.463347			-0.00688237	-0.112867	-0.022108	0.0372367	0.0937167	0.499647		-0.349692	-0.0125249	-0.042514	0.199709	0.110216	0.380875
-0.845	-0.597692	0.0400542	-0.00805925	0.249763	0.10399	0.468469			-0.00600444	-0.112076	-0.0331718	0.036689	0.0937533	0.50414		-0.342753	-0.0155925	-0.0308925	0.195622	0.108334	0.386338
-0.844	-0.591839	0.0365878	-0.0117883	0.248662	0.102911	0.468859			-0.00639463	-0.112266	-0.0335888	0.0395115	0.0926641	0.489298		-0.336782	-0.0168989	-0.0352949	0.196097	0.106092	0.388074
-0.843	-0.587694	0.0334782	-0.0126269	0.247757	0.101871	0.472203			-0.00873578	-0.111211	-0.0386524	0.0377862	0.0918169	0.483634		-0.334927	-0.0196252	-0.033474	0.196343	0.103761	0.397504
-0.842	-0.583527	0.0302528	-0.0103007	0.245491	0.101307	0.465993			-0.00971125	-0.109004	-0.0389028	0.0361454	0.0938463	0.493991		-0.331215	-0.0212411	-0.0275023	0.190222	0.101683	0.396757
-0.841	-0.579975	0.0269625	-0.0100948	0.246161	0.100161	0.465789			-0.00815049	-0.10552	-0.0430389	0.0379625	0.0974999	0.503284		-0.332667	-0.022344	-0.0342473	0.189285	0.10089	0.401634
-0.84	-0.572095	0.0237606	-0.0106039	0.242544	0.0990937	0.476944			-0.0131254	-0.104628	-0.0346944	0.0384572	0.098876	0.501028		-0.331134	-0.0235134	-0.0495202	0.193954	0.0994348	0.415278
-0.839	-0.566152	0.0214399	-0.0116181	0.240524	0.0984395	0.483144			-0.0140033	-0.104363	-0.0397934	0.0363902	0.100452	0.507313		-0.326293	-0.0247948	-0.0445706	0.192955	0.0980244	0.421085
-0.838	-0.561529	0.0185663	-0.00860921	0.239222	0.0982142	0.479626			-0.0121499	-0.105708	-0.0448291	0.0356257	0.101271	0.50569		-0.325567	-0.0249905	-0.0482128	0.189999	0.0982507	0.409853
-0.837	-0.557908	0.0167655	-0.0105215	0.240597	0.0987307	0.485799			-0.00766276	-0.104557	-0.0499745	0.0385856	0.101361	0.498953		-0.325083	-0.0263689	-0.0487355	0.188993	0.0970576	0.417444
-0.836	-0.552853	0.0145612	-0.010106	0.238988	0.0988849	0.485964			-0.00990635	-0.105643	-0.0469339	0.0372994	0.0994807	0.496732		-0.322017	-0.0281446	-0.0537306	0.186502	0.0973255	0.424381
-0.835	-0.54634	0.0132931	-0.0149301	0.238184	0.0998895	0.489627			-0.0114671	-0.105714	-0.0597076	0.0372242	0.0977526	0.503758		-0.31774	-0.0305454	-0.0508257	0.185723	0.0974364	0.428407
-0.834	-0.538255	0.0119866	-0.0100873	0.236724	0.101581	0.490872			-0.00883333	-0.106983	-0.0661696	0.035066	0.0963921	0.498679		-0.31419	-0.0312615	-0.0539422	0.183599	0.0992233	0.42753
-0.833	-0.530035	0.0120751	-0.00686186	0.234829	0.10464	0.489306			-0.00678483	-0.108119	-0.0592359	0.037871	0.0965298	0.501937		-0.304346	-0.0330393	-0.052419	0.184515	0.0986618	0.435779
-0.832	-0.525002	0.01126	-0.00919232	0.233366	0.105721	0.490233			-0.00863823	-0.109427	-0.059206	0.0379245	0.0948194	0.501561		-0.297972	-0.0349995	-0.0512812	0.180618	0.0981024	0.431395
-0.831	-0.520698	0.0102578	-0.00856356	0.234934	0.106804	0.483538			-0.00551671	-0.109432	-0.0573306	0.0397572	0.0942793	0.505342		-0.292646	-0.0360446	-0.0564075	0.176144	0.0976838	0.431519
-0.83	-0.514344	0.0107988	-0.0156419	0.234506	0.108659	0.488295			-0.00658973	-0.106659	-0.0525005	0.038187	0.0945215	0.509439		-0.290226	-0.038859	-0.063506	0.175888	0.0967156	0.430508
-0.829	-0.507194	0.0116262	-0.0175932	0.2326	0.111242	0.489535			-0.0104916	-0.106319	-0.0426601	0.0376461	0.0945589	0.512241		-0.284578	-0.0414924	-0.0741809	0.176966	0.0955185	0.413965
-0.828	-0.499611	0.0116123	-0.0160844	0.229712	0.111682	0.486563			-0.0131254	-0.10455	-0.0540348	0.0361855	0.0958165	0.519465		-0.281834	-0.0434899	-0.0792263	0.175178	0.0943731	0.437156
-0.827	-0.496104	0.0121639	-0.0166168	0.229591	0.112825	0.48162			-0.0101014	-0.10434	-0.0811185	0.0404048	0.0955645	0.500844		-0.276428	-0.0457121	-0.0654794	0.173057	0.093638	0.439099
-0.826	-0.493576	0.0134104	-0.0191364	0.22919	0.114263	0.484757			-0.011272	-0.102453	-0.0763866	0.0383546	0.0966073	0.512037		-0.274411	-0.0470549	-0.0807307	0.172382	0.0932144	0.453054
-0.825	-0.491549	0.0140944	-0.0238942	0.227657	0.116192	0.485762			-0.0128328	-0.101905	-0.0766113	0.038863	0.0964236	0.50134		-0.274895	-0.0490591	-0.0816231	0.170476	0.0932946	0.456103
-0.824	-0.487792	0.0152522	-0.0218935	0.227372	0.117297	0.498878			-0.0131254	-0.10093	-0.0757257	0.0383898	0.097038	0.503775		-0.276428	-0.0516309	-0.0839702	0.170154	0.0923493	0.454319
-0.823	-0.482235	0.016469	-0.0159013	0.224832	0.118425	0.503211			-0.0146862	-0.100055	-0.0786906	0.0388888	0.0965061	0.508995		-0.271668	-0.0536733	-0.0921311	0.17112	0.0923749	0.45123
-0.822	-0.478091	0.0176198	-0.0145399	0.223622	0.120666	0.502091			-0.0165396	-0.100141	-0.0690171	0.0380844	0.0951928	0.50177		-0.270941	-0.0540684	-0.0998648	0.170587	0.093432	0.447604
-0.821	-0.475608	0.0182046	-0.0149536	0.221421	0.121343	0.502179			-0.014296	-0.10015	-0.0751419	0.0378927	0.09428	0.495149		-0.267472	-0.0560244	-0.101741	0.169305	0.0921357	0.451469
-0.82	-0.473764	0.0202064	-0.0218146	0.22066	0.122639	0.500948			-0.012345	-0.0987559	-0.0860885	0.0380456	0.0943323	0.49948		-0.268198	-0.0575627	-0.113325	0.166697	0.0921667	0.453286
-0.819	-0.47012	0.0213109	-0.0269414	0.220217	0.123795	0.512671			-0.0127352	-0.0982102	-0.0831408	0.0382032	0.0942862	0.495927		-0.269166	-0.0594176	-0.101985	0.164568	0.0924983	0.450975
-0.818	-0.462127	0.0236401	-0.02153	0.218192	0.125322	0.513444			-0.015369	-0.0975344	-0.0652161	0.0368303	0.0944528	0.508361		-0.264083	-0.0614404	-0.0968719	0.163608	0.0926182	0.457786
-0.817	-0.456047	0.0264039	-0.0204147	0.217966	0.126725	0.504652			-0.0117598	-0.0943156	-0.0608294	0.036387	0.0953552	0.510076		-0.259242	-0.0626545	-0.0962813	0.164359	0.0925396	0.447994
-0.816	-0.450741	0.0289233	-0.0218816	0.216183	0.129614	0.504745			-0.0113696	-0.0926276	-0.0651608	0.0374929	0.0961957	0.504254		-0.251818	-0.0640056	-0.103841	0.161051	0.093508	0.439344
-0.815	-0.448259	0.0300494	-0.0243358	0.215649	0.130521	0.503276			-0.0119548	-0.0935718	-0.0651066	0.0342778	0.0957832	0.500115		-0.248349	-0.0650695	-0.10807	0.157603	0.0947919	0.45769
-0.814	-0.445025	0.0306798	-0.0157046	0.216292	0.13056	0.494215			-0.012345	-0.0923359	-0.0637731	0.0353289	0.0960453	0.500825		-0.242943	-0.0674424	-0.112817	0.154497	0.0950942	0.468738
-0.813	-0.439742	0.030704	-0.0140412	0.216984	0.130018	0.503275			-0.00912597	-0.0924197	-0.0718336	0.0380166	0.0950195	0.504111		-0.240845	-0.0694368	-0.0964134	0.153415	0.0950473	0.473288
-0.812	-0.433684	0.030536	-0.0164433	0.214664	0.128518	0.501181			-0.0161494	-0.0915541	-0.0779973	0.0360421	0.094801	0.493647		-0.23673	-0.071049	-0.0987397	0.152182	0.0941513	0.470346
-0.811	-0.429153	0.0302023	-0.0145868	0.212602	0.127755	0.501347			-0.0171249	-0.0886949	-0.0793833	0.0373116	0.0947014	0.494638		-0.229952	-0.0734982	-0.0983294	0.150225	0.0933932	0.469168
-0.81	-0.425896	0.0295525	-0.0173959	0.210796	0.126732	0.503115			-0.0120524	-0.0887278	-0.0970948	0.0375986	0.0945569	0.48489		-0.229145	-0.0755252	-0.0941172	0.149865	0.0923518	0.472663
-0.809	-0.427627	0.0294406	-0.0172973	0.211968	0.125293	0.508098			-0.0138083	-0.0889941	-0.075305	0.0365637	0.0940384	0.482851		-0.229791	-0.0768708	-0.0899369	0.148077	0.090839	0.463567
-0.808	-0.426557	0.0302564	-0.0139305	0.210549	0.125058	0.500014			-0.0187832	-0.0884464	-0.0642953	0.0370395	0.0917685	0.504422		-0.231324	-0.0792604	-0.0953771	0.145678	0.0894219	0.470885
-0.807	-0.422731	0.0317444	-0.00910014	0.208768	0.12528	0.505293			-0.0177101	-0.0879526	-0.0659501	0.0356156	0.0905522	0.511254		-0.231001	-0.0810945	-0.0912423	0.148155	0.0886131	0.472831
-0.806	-0.41911	0.0326121	-0.00415744	0.205988	0.126399	0.506824			-0.0171249	-0.0883942	-0.0526938	0.0364695	0.088119	0.526569		-0.229791	-0.0818217	-0.0897851	0.147067	0.0888011	0.462971
-0.805	-0.417607	0.0328062	-0.00284425	0.203969	0.127316	0.504578			-0.0188807	-0.0858921	-0.0574216	0.0363581	0.0876656	0.517564		-0.227854	-0.0840083	-0.102251	0.143199	0.0877537	0.45573
-0.804	-0.415193	0.0322124	-0.00311021	0.202727	0.127545	0.500078			-0.0163445	-0.0847788	-0.0565774	0.0367447	0.0860328	0.508251		-0.22737	-0.0846551	-0.0960557	0.143685	0.0881497	0.455156
-0.803	-0.416286	0.0324886	-0.00834294	0.201273	0.126591	0.49943			-0.0118573	-0.084586	-0.0624876	0.0349061	0.0841193	0.506877		-0.227774	-0.0839161	-0.0960656	0.141041	0.090463	0.443058
-0.802	-0.411663	0.0321438	-0.00819009	0.202342	0.125784	0.505343			-0.0141984	-0.0796732	-0.0527693	0.035365	0.0845495	0.508278		-0.226644	-0.0850878	-0.0803587	0.137814	0.0902326	0.435468
-0.801	-0.406426	0.0317989	-0.00640164	0.199465	0.124993	0.505548			-0.0150764	-0.0799631	-0.0472082	0.0366766	0.0838831	0.523015		-0.223497	-0.0858485	-0.0856124	0.140255	0.0904339	0.437037
-0.8	-0.399753	0.0312123	-0.00171079	0.197209	0.123822	0.502334			-0.013223	-0.0790059	-0.0473277	0.0366339	0.0835941	0.52155		-0.215832	-0.0869617	-0.0959719	0.136845	0.0904207	0.439017
-0.799	-0.397522	0.0300543	0.00205416	0.19632	0.1231	0.505052			-0.0101014	-0.079257	-0.0551986	0.0385187	0.0833721	0.520256		-0.213653	-0.08813	-0.0974486	0.133854	0.0893081	0.431018
-0.798	-0.396042	0.0296302	0.00181355	0.196321	0.121235	0.509009			-0.0107843	-0.0788529	-0.0563758	0.0359549	0.0827221	0.524299		-0.209942	-0.0898471	-0.104078	0.131218	0.0875198	0.431088
-0.797	-0.393764	0.0287621	-0.00452032	0.19554	0.120367	0.50301			-0.0113696	-0.0777193	-0.0646511	0.0350668	0.0825038	0.513956		-0.207198	-0.0894243	-0.107551	0.129034	0.0871994	0.440062
-0.796	-0.38798	0.0300181	-0.0123384	0.195868	0.120419	0.501608			-0.0102965	-0.0756442	-0.0580318	0.0375205	0.0821636	0.5151		-0.203406	-0.090768	-0.107907	0.126371	0.0865735	0.435598
-0.795	-0.383904	0.0289447	-0.00354023	0.195118	0.118906	0.503334			-0.012345	-0.0758873	-0.0501409	0.0382492	0.0836055	0.513987		-0.200017	-0.0897283	-0.114671	0.124469	0.0872458	0.428445
-0.794	-0.380192	0.029397	0.000603683	0.192443	0.117861	0.502249			-0.0133205	-0.0775865	-0.0514053	0.0375794	0.0842097	0.498489		-0.196547	-0.0894126	-0.112495	0.123493	0.0860963	0.434521
-0.793	-0.380716	0.0289403	0.00296092	0.189185	0.117111	0.507268			-0.0131254	-0.0774287	-0.0645666	0.0396667	0.0838881	0.49654		-0.194046	-0.0887786	-0.114581	0.124092	0.0864095	0.43968
-0.792	-0.381854	0.0296285	-0.000703938	0.189163	0.116267	0.505879			-0.0098088	-0.0796766	-0.080567	0.0404344	0.0824391	0.495275		-0.197435	-0.0877809	-0.111673	0.121497	0.0884067	0.4366
-0.791	-0.382037	0.0297594	0.000669774	0.189712	0.114362	0.507895			-0.0120524	-0.0810724	-0.0601884	0.0388682	0.0818097	0.508448		-0.199856	-0.0861948	-0.11833	0.119808	0.087695	0.449889
-0.79	-0.376731	0.02935	-0.00858595	0.186502	0.113104	0.499461			-0.0156617	-0.082266	-0.0693272	0.0391902	0.0820381	0.517467		-0.198242	-0.0832513	-0.120282	0.121478	0.0880377	0.441212
-0.789	-0.374408	0.0295129	-0.00628695	0.183394	0.111907	0.501169			-0.0136131	-0.0843968	-0.0689259	0.0374679	0.0816349	0.508096		-0.196547	-0.0820601	-0.134018	0.120126	0.087531	0.431417
-0.788	-0.372836	0.0281745	-0.00194801	0.181231	0.110433	0.5018			-0.0118573	-0.0861841	-0.0629178	0.0400359	0.0807075	0.482775		-0.198807	-0.0783087	-0.137994	0.116492	0.0903703	0.428108
-0.787	-0.37311	0.0276977	0.00217039	0.17976	0.109367	0.502982			-0.0105892	-0.0879274	-0.0612917	0.0400231	0.0802665	0.478962		-0.199452	-0.0766552	-0.147275	0.118141	0.0898449	0.420995
-0.786	-0.372814	0.0273236	0.00456561	0.177633	0.108178	0.503583			-0.00902842	-0.0905295	-0.0570276	0.038761	0.0797822	0.472873		-0.198807	-0.0759415	-0.133864	0.118699	0.0918848	0.425447
-0.785	-0.368168	0.0261735	0.00262753	0.177253	0.107904	0.50701			-0.00785784	-0.0926029	-0.0677562	0.0388715	0.0786285	0.478967		-0.198726	-0.0735847	-0.142321	0.110717	0.0931721	0.428572
-0.784	-0.361701	0.0253764	0.00462637	0.175043	0.106646	0.503115			-0.00883332	-0.0938879	-0.0761609	0.0390314	0.0768531	0.488208		-0.193723	-0.0700487	-0.13911	0.113572	0.0947894	0.426824
-0.783	-0.35742	0.0232963	0.00360111	0.17207	0.105873	0.503318			-0.00834558	-0.0961261	-0.0743457	0.0401169	0.074758	0.478484		-0.185655	-0.0687068	-0.144733	0.114747	0.0956154	0.430534
-0.782	-0.354619	0.0214357	0.00661058	0.170232	0.105168	0.508794			-0.0053216	-0.0960169	-0.0671381	0.0428772	0.0734089	0.478136		-0.182911	-0.065621	-0.12551	0.109322	0.0967948	0.418711
-0.781	-0.352523	0.0206491	0.00429661	0.171146	0.104708	0.506082			-0.00317556	-0.0961193	-0.0643274	0.0406301	0.0737814	0.477833		-0.182508	-0.0619173	-0.132809	0.107069	0.0984746	0.429975
-0.78	-0.349495	0.0196675	-0.00116028	0.170248	0.104515	0.504023			-0.00522406	-0.0974285	-0.0684676	0.0420475	0.0736675	0.474114		-0.180571	-0.0603902	-0.131446	0.104658	0.0986431	0.425555
-0.779	-0.343938	0.0179909	-0.000435906	0.167924	0.103389	0.499594			-0.00678481	-0.0987741	-0.0663049	0.0425849	0.072718	0.455086		-0.177263	-0.0580828	-0.13295	0.104267	0.0988718	0.437725
-0.778	-0.339657	0.0184878	-0.00524219	0.166089	0.103831	0.497317			-0.00610199	-0.100457	-0.0496231	0.042222	0.0724782	0.457578		-0.174681	-0.0562707	-0.125865	0.0994279	0.0981574	0.443757
-0.777	-0.337129	0.0172339	-0.00609317	0.163811	0.104005	0.502488			-0.00512651	-0.101569	-0.0463407	0.0399569	0.0705379	0.448373		-0.173955	-0.0555959	-0.129271	0.102983	0.0973779	0.456711
-0.776	-0.337881	0.0160779	-0.0034459	0.162047	0.103567	0.508921			-0.00454123	-0.102536	-0.0473571	0.0398109	0.0678974	0.447016		-0.173551	-0.0567193	-0.13634	0.102306	0.097166	0.449217
-0.775	-0.337858	0.0147173	-0.00864571	0.159887	0.103323	0.506803			-0.00512652	-0.1028	-0.0353902	0.0384547	0.0675635	0.450262		-0.177505	-0.0577545	-0.123532	0.0979856	0.0952889	0.461908
-0.774	-0.336651	0.0128504	-0.00892581	0.160215	0.101555	0.513346			-0.00356575	-0.103318	-0.0294542	0.0393827	0.0683224	0.447323		-0.177263	-0.0588638	-0.114019	0.0981473	0.0945151	0.46275
-0.773	-0.332028	0.0106182	-0.00873122	0.15679	0.100237	0.506641			-0.00815049	-0.102794	-0.00990752	0.0385378	0.0676153	0.447572		-0.176053	-0.0579583	-0.10436	0.0992124	0.0934466	0.45578
-0.772	-0.329341	0.00969215	-0.00946993	0.152671	0.0992303	0.50774			-0.00707747	-0.103305	-0.0227228	0.0383725	0.0668432	0.451673		-0.176133	-0.0549573	-0.082544	0.101043	0.091999	0.455235
-0.771	-0.328294	0.00835724	-0.0165542	0.151072	0.0978204	0.507459			-0.0018099	-0.103983	-0.0235895	0.0374122	0.0663642	0.446298		-0.176779	-0.0525878	-0.0764514	0.098674	0.0921431	0.441028
-0.77	-0.327906	0.00756962	-0.01407	0.15082	0.0969849	0.510994			0.000141059	-0.102862	-0.025873	0.0386504	0.0691683	0.446518		-0.179926	-0.0513227	-0.0761143	0.0976573	0.0921964	0.442544
-0.769	-0.325561	0.00680976	-0.0143574	0.148695	0.0972478	0.506001			-0.00249273	-0.104644	-0.0251992	0.0414557	0.0689759	0.454824		-0.179764	-0.0495878	-0.0638719	0.0983196	0.0922442	0.448664
-0.768	-0.32046	0.00635261	-0.0218292	0.146374	0.0962727	0.502236			-0.00112706	-0.10655	-0.023131	0.0405644	0.0696155	0.464985		-0.178877	-0.0503483	-0.0543874	0.095723	0.0918301	0.454918
-0.767	-0.313788	0.00533067	-0.0152344	0.145424	0.0948983	0.505688			0.00326257	-0.107571	-0.0210883	0.0376495	0.0703679	0.46992		-0.173309	-0.0508836	-0.0528383	0.0965923	0.090625	0.446111
-0.766	-0.309506	0.00530272	-0.0101236	0.143529	0.0949762	0.503675			0.00170182	-0.107356	-0.0302698	0.0390819	0.0719064	0.475975		-0.168387	-0.0510047	-0.057416	0.100366	0.0905585	0.457162
-0.765	-0.307001	0.00435366	-0.00985674	0.140724	0.0937025	0.501785			0.00423805	-0.108379	-0.0262433	0.0395093	0.0718843	0.488365		-0.16637	-0.0498207	-0.0539156	0.0957441	0.0912103	0.451664
-0.764	-0.304383	0.00426997	-0.00917945	0.140715	0.0927319	0.504345			0.00648164	-0.109546	-0.0361729	0.0368062	0.0713259	0.503765		-0.166451	-0.050385	-0.0572788	0.0905259	0.0919337	0.471249
-0.763	-0.299236	0.0054401	-0.0116305	0.141501	0.0921545	0.505384			0.00628656	-0.11116	-0.0303011	0.0399177	0.0719768	0.501445		-0.164111	-0.049647	-0.0570374	0.0889997	0.0923751	0.473334
-0.762	-0.29418	0.0053076	-0.0175159	0.138261	0.0916041	0.512579			0.00326258	-0.112169	-0.0272341	0.0421584	0.0714993	0.507107		-0.160803	-0.049722	-0.0487168	0.0900453	0.0938344	0.479974
-0.761	-0.288715	0.00506152	-0.0169848	0.135118	0.0913591	0.508821			0.00560372	-0.114092	-0.0428122	0.0365676	0.0703033	0.510432		-0.158302	-0.0490806	-0.0463628	0.0880811	0.09345	0.470607
-0.76	-0.288373	0.00510458	-0.018931	0.134692	0.091564	0.507278			0.00833504	-0.115087	-0.0324277	0.0351864	0.070532	0.50261		-0.159593	-0.0504752	-0.0442415	0.0884363	0.0923045	0.482346
-0.759	-0.288692	0.00475149	-0.015452	0.134282	0.0908173	0.511322			0.00609145	-0.116347	-0.0401884	0.0373786	0.0696018	0.497267		-0.161771	-0.0505931	-0.0542192	0.0899132	0.0912567	0.466913
-0.758	-0.287576	0.00429009	-0.0124873	0.132027	0.0906086	0.512855			0.00423805	-0.118429	-0.0361372	0.0359949	0.0691522	0.50929		-0.16282	-0.0519952	-0.0401925	0.0853264	0.0891292	0.458989
-0.757	-0.284821	0.00589004	-0.0108121	0.130519	0.0909346	0.518342			0.00560372	-0.119434	-0.041686	0.0379572	0.0692105	0.50208		-0.163304	-0.0529236	-0.0327326	0.085662	0.0881332	0.467755
-0.756	-0.281769	0.00527537	-0.00922089	0.12967	0.0902354	0.512735			0.00482333	-0.120559	-0.0490855	0.0338336	0.0679593	0.504412		-0.165402	-0.0543498	-0.03017	0.0857331	0.0867348	0.456156
-0.755	-0.278171	0.00437486	-0.0104993	0.126206	0.0900272	0.511617			0.00570126	-0.120938	-0.0387215	0.035579	0.0696227	0.507921		-0.162175	-0.0554647	-0.0262751	0.0880851	0.0847989	0.461054
-0.754	-0.278058	0.0034498	-0.00976811	0.124911	0.0893613	0.507585			0.00813995	-0.122056	-0.0315382	0.0346862	0.0692681	0.487537		-0.164999	-0.0558975	-0.0331983	0.0846563	0.0835772	0.456229
-0.753	-0.27635	0.00260347	-0.0116718	0.125823	0.0889943	0.503251			0.0147732	-0.122189	-0.0167404	0.0351958	0.072242	0.496449		-0.167258	-0.0551996	-0.0342129	0.0829293	0.0829393	0.451516
-0.752	-0.27389	0.000688255	-0.0201479	0.12448	0.0884227	0.499455			0.0100909	-0.123678	-0.0150971	0.0379016	0.0732089	0.489803		-0.16637	-0.0552356	-0.026807	0.0835395	0.0804352	0.455517
-0.751	-0.26715	-6.35115e-05	-0.0192509	0.12298	0.08842	0.496428			0.0117492	-0.125523	-0.0167477	0.0394006	0.0728595	0.491313		-0.162175	-0.0555611	-0.0238496	0.0833639	0.0794539	0.456673
-0.75	-0.260819	-0.000568278	-0.0180777	0.121029	0.0892623	0.495459			0.0142854	-0.1244	-0.0203468	0.0368366	0.0758643	0.500851		-0.157333	-0.0563358	-0.0214381	0.0833332	0.0789655	0.458903
-0.749	-0.257335	-0.00193199	-0.0217455	0.120807	0.0887513	0.491302			0.0151634	-0.125982	-0.0265839	0.0358134	0.076158	0.494841		-0.154751	-0.057005	-0.0353838	0.0845377	0.0777472	0.45093
-0.748	-0.255627	-0.00310242	-0.0162033	0.119919	0.0887241	0.494209			0.0164315	-0.126476	-0.0320545	0.0349437	0.0783445	0.498934		-0.151685	-0.0558963	-0.0486474	0.0832441	0.0781223	0.44915
-0.747	-0.252735	-0.00531593	-0.0141774	0.119318	0.088062	0.488631			0.0170168	-0.128378	-0.0207206	0.0375025	0.0785734	0.49512		-0.150636	-0.0573898	-0.0607691	0.0788604	0.0767675	0.437307
-0.746	-0.248157	-0.00733258	-0.0138831	0.118618	0.0876141	0.487801			0.0175045	-0.130065	-0.0169851	0.0373225	0.0782683	0.489674		-0.148458	-0.0587636	-0.0600975	0.0764632	0.0760729	0.445833
-0.745	-0.242259	-0.00907425	-0.0148853	0.117333	0.0865539	0.489831			0.0134075	-0.131933	-0.00869347	0.0375539	0.0775769	0.483928		-0.144907	-0.0590205	-0.0470769	0.0789301	0.0768129	0.433332
-0.744	-0.238229	-0.0107786	-0.0130022	0.114029	0.0857016	0.487544			0.0139928	-0.133617	-0.0252402	0.0361487	0.0760733	0.481083		-0.141276	-0.0607396	-0.0588312	0.0783355	0.0758074	0.437687
-0.743	-0.23791	-0.0130911	-0.0201863	0.113707	0.0847805	0.493979			0.0178947	-0.134972	-0.0214733	0.0338528	0.0740383	0.485011		-0.141115	-0.0627288	-0.0515672	0.0767012	0.0750596	0.45541
-0.742	-0.239436	-0.0148471	-0.0184269	0.114482	0.0840408	0.494181			0.0144805	-0.136141	-0.0208049	0.0341018	0.0723829	0.491678		-0.145795	-0.0626458	-0.0528627	0.0748111	0.0746822	0.451743
-0.741	-0.23775	-0.0167517	-0.0086453	0.111889	0.0833247	0.49641			0.0139928	-0.137474	-0.0215478	0.0350949	0.070196	0.488199		-0.145311	-0.0631962	-0.0611249	0.0730137	0.0755465	0.4619
-0.74	-0.234084	-0.0185753	-0.00631108	0.110815	0.0829874	0.498974			0.0134075	-0.138008	-0.0128057	0.0391239	0.0683359	0.486751		-0.144746	-0.0625934	-0.0687145	0.0752512	0.0764966	0.457031
-0.739	-0.232353	-0.0196513	-0.00487923	0.110941	0.083592	0.496706			0.0138953	-0.139582	-0.00675645	0.0366884	0.066694	0.495416		-0.146198	-0.0626522	-0.06202	0.0735769	0.0783474	0.463281
-0.738	-0.230076	-0.0208862	-0.00325827	0.110282	0.0847486	0.492571			0.0146756	-0.138925	-0.0108735	0.0357521	0.0659387	0.511126		-0.145634	-0.0629635	-0.0568745	0.0754586	0.07881	0.483333
-0.737	-0.230304	-0.0222489	-0.00463377	0.109316	0.0849521	0.490319			0.0159438	-0.139629	-0.00474985	0.0366007	0.0656916	0.502507		-0.145392	-0.0643347	-0.0602823	0.0720938	0.0788951	0.48857
-0.736	-0.229233	-0.0241438	-0.00448679	0.109935	0.0850492	0.491311			0.0177972	-0.136894	-0.000843529	0.0363594	0.0697995	0.505144		-0.146925	-0.0663961	-0.0706714	0.0701467	0.0794506	0.492836
-0.735	-0.225818	-0.0260765	-0.00178476	0.109959	0.0849667	0.487358			0.0175045	-0.13528	0.00879819	0.0392496	0.0715253	0.495504		-0.145069	-0.0682169	-0.0632604	0.0713936	0.0791216	0.501968
-0.734	-0.218553	-0.0281511	0.0028085	0.107005	0.084114	0.479013			0.0176021	-0.132431	0.021052	0.0417904	0.0753625	0.48701		-0.139905	-0.0702226	-0.0580384	0.0735301	0.0774517	0.510273
-0.733	-0.214181	-0.0300224	0.000541749	0.107231	0.0837224	0.476546			0.0207236	-0.129984	0.0173034	0.0375917	0.079352	0.494315		-0.133934	-0.0722798	-0.0647299	0.0713897	0.076238	0.51867
-0.732	-0.211289	-0.032284	0.00389376	0.107342	0.0825941	0.468033			0.0212113	-0.125631	0.0124937	0.0382532	0.0854594	0.504117		-0.131191	-0.0742733	-0.0832682	0.0698203	0.0756883	0.510228
-0.731	-0.210902	-0.0338792	-0.00137426	0.107139	0.0822721	0.470671			0.0191628	-0.125516	0.00926972	0.0377233	0.0880924	0.490118		-0.124736	-0.0766218	-0.0874882	0.0696531	0.0754981	0.515115
-0.73	-0.207417	-0.0356687	-0.0109149	0.105173	0.0822159	0.473692			0.0187726	-0.12566	0.0165953	0.0370231	0.0899446	0.498506		-0.125462	-0.0789254	-0.0935288	0.0689666	0.0756687	0.506283
-0.729	-0.202886	-0.0373944	-0.0180042	0.104164	0.0821203	0.470382			0.0179923	-0.124255	0.0214916	0.0402626	0.0919536	0.49938		-0.121831	-0.0798414	-0.09868	0.0657041	0.0771474	0.503155
-0.728	-0.198217	-0.0388791	-0.0134967	0.103024	0.0830083	0.477207			0.0156511	-0.125574	0.0259334	0.0372139	0.092146	0.504407		-0.119652	-0.0804403	-0.105803	0.0692208	0.0769841	0.504302
-0.727	-0.195849	-0.0409142	-0.0099416	0.100556	0.083355	0.479716			0.0141879	-0.126365	0.0235516	0.0348396	0.0925557	0.493285		-0.115618	-0.0793237	-0.107219	0.0688648	0.0797904	0.503901
-0.726	-0.19676	-0.043367	-0.0065398	0.100924	0.0833104	0.484504			0.0175045	-0.125224	0.0330625	0.03753	0.0937148	0.503536		-0.116102	-0.0815406	-0.12301	0.0673444	0.0792854	0.512485
-0.725	-0.197625	-0.0461606	-0.00830545	0.101026	0.0832878	0.480481			0.0171143	-0.125271	0.0122313	0.036579	0.0933172	0.506423		-0.119733	-0.0828653	-0.123174	0.0656818	0.079355	0.515672
-0.724	-0.197307	-0.0486152	-0.00656152	0.100028	0.0825439	0.494238			0.0115541	-0.124557	0.00603254	0.0361102	0.0939297	0.50707		-0.119572	-0.0829158	-0.122806	0.0663461	0.0803637	0.522917
-0.723	-0.192615	-0.0507386	-0.00983802	0.098393	0.0821892	0.498716			0.0119443	-0.125416	-0.00043383	0.0391352	0.0936181	0.508583		-0.119652	-0.0849299	-0.125395	0.070338	0.0786604	0.509371
-0.722	-0.191021	-0.0535895	-0.00912651	0.0972044	0.0813365	0.50068			0.0125296	-0.124003	0.0145683	0.0383725	0.0937489	0.505357		-0.117716	-0.0870591	-0.112235	0.0659183	0.0784755	0.511271
-0.721	-0.191112	-0.0562392	-0.0131066	0.0980412	0.0805056	0.503243			0.0152609	-0.125128	-0.00347349	0.039597	0.0920532	0.50207		-0.117635	-0.0886757	-0.131282	0.0670807	0.0781251	0.526532
-0.72	-0.191044	-0.0586426	-0.00965401	0.0972551	0.0797532	0.505708			0.0141879	-0.125697	-0.00492393	0.0392757	0.0916246	0.504592		-0.117796	-0.090013	-0.146083	0.0654568	0.0766118	0.529081
-0.719	-0.189905	-0.0609521	-0.0125531	0.0971586	0.0792969	0.505645			0.015456	-0.125367	-0.00207381	0.0377704	0.0929413	0.514522		-0.117393	-0.0913156	-0.143904	0.0657073	0.0746843	0.527021
-0.718	-0.186262	-0.0633813	-0.0171169	0.0968724	0.0780973	0.504421			0.0147732	-0.125791	-0.0140265	0.0364425	0.0910961	0.507762		-0.116102	-0.092229	-0.124223	0.0643772	0.0733928	0.533184
-0.717	-0.181206	-0.0657229	-0.0214977	0.0954916	0.0773936	0.503233			0.0155536	-0.125798	0.000258443	0.0378284	0.0904933	0.51969		-0.108437	-0.0928015	-0.117124	0.0694608	0.0725299	0.529863
-0.716	-0.177039	-0.0684305	-0.0280246	0.0948979	0.0763936	0.492098			0.0155536	-0.122747	0.00776979	0.0377428	0.0937225	0.503104		-0.10529	-0.0932124	-0.116139	0.0668388	0.0706874	0.535598
-0.715	-0.175559	-0.0707942	-0.0220769	0.0942105	0.0755009	0.495954			0.0176021	-0.120038	0.0110775	0.0401797	0.0969928	0.508273		-0.101901	-0.0938296	-0.116612	0.0635771	0.0702983	0.52882
-0.714	-0.174238	-0.0732109	-0.0228509	0.094233	0.0745172	0.495773			0.0179923	-0.11835	0.0148857	0.0374648	0.0992384	0.518388		-0.101336	-0.0934007	-0.117568	0.0634271	0.0713151	0.526029
-0.713	-0.170367	-0.0752914	-0.0292806	0.0930207	0.0737366	0.49648			0.0139928	-0.118459	0.00700487	0.0358069	0.100091	0.519351		-0.0973018	-0.0932858	-0.124843	0.0652433	0.0721909	0.528445
-0.712	-0.166382	-0.0772078	-0.0355385	0.0918874	0.0733675	0.494574			0.0127247	-0.119121	0.000624893	0.0365349	0.100898	0.523332		-0.0936708	-0.0946902	-0.115558	0.0648548	0.0719244	0.520986
-0.711	-0.162556	-0.0793406	-0.0373289	0.0896853	0.0727002	0.498983			0.0127247	-0.118437	-0.00355922	0.0392671	0.100867	0.524388		-0.0897171	-0.0951279	-0.108546	0.0649019	0.0732381	0.522125
-0.71	-0.162055	-0.0810959	-0.0291856	0.0894336	0.0719483	0.499399			0.00979826	-0.119818	-0.00498399	0.0375979	0.0991126	0.524468		-0.090524	-0.0938131	-0.108218	0.0665951	0.0756757	0.536775
-0.709	-0.163489	-0.0825846	-0.0282165	0.08847	0.0712968	0.498608			0.00940807	-0.119972	-0.00119782	0.0364944	0.0981338	0.519617		-0.0888296	-0.094237	-0.109217	0.0635351	0.0773363	0.549704
-0.708	-0.16563	-0.084141	-0.0359873	0.088309	0.0708872	0.494887			0.00882279	-0.119083	0.0104911	0.0404287	0.0979871	0.531434		-0.0925412	-0.0945275	-0.113582	0.0626955	0.0786841	0.538469
-0.707	-0.162852	-0.085328	-0.0377721	0.0873578	0.070834	0.492943			0.0063841	-0.120232	0.00507691	0.0386121	0.0972212	0.533644		-0.0939936	-0.0952084	-0.114494	0.0673153	0.0802796	0.541852
-0.706	-0.159937	-0.0852197	-0.0449185	0.0870824	0.0718377	0.491902			0.00540863	-0.120904	0.0100179	0.0382148	0.0961064	0.527167		-0.093106	-0.0971118	-0.0992507	0.070944	0.0803794	0.524923
-0.705	-0.159345	-0.0857456	-0.0420992	0.0851817	0.0717486	0.495038			0.00716448	-0.121347	0.0318309	0.0387425	0.0951345	0.517366		-0.0910888	-0.0986222	-0.0991598	0.0652622	0.0807079	0.526172
-0.704	-0.159891	-0.0859815	-0.0374993	0.0865758	0.072703	0.49921			0.00989581	-0.11896	0.024281	0.0407097	0.0951993	0.507639		-0.0927833	-0.100511	-0.0855317	0.0676693	0.0793419	0.507571
-0.703	-0.161212	-0.0850604	-0.0409373	0.0864188	0.0759966	0.50248			0.00804241	-0.11796	0.0143638	0.0391145	0.0961828	0.491968		-0.0933481	-0.102416	-0.0896829	0.0651364	0.0784076	0.495286
-0.702	-0.159254	-0.0843425	-0.040098	0.085405	0.0778615	0.507471			0.00696938	-0.11596	0.0313725	0.0363756	0.0982033	0.504086		-0.0931867	-0.104532	-0.0940471	0.0650548	0.0777416	0.496682
-0.701	-0.155929	-0.0838796	-0.0388095	0.0855368	0.0793791	0.499517			0.00872524	-0.115232	0.0174538	0.035275	0.0988537	0.497182		-0.0901206	-0.105324	-0.09738	0.0656577	0.0782977	0.50293
-0.7	-0.149803	-0.0824448	-0.0356467	0.0848818	0.0812182	0.500917			0.00882278	-0.113486	0.0120269	0.0375228	0.0993823	0.495955		-0.0851986	-0.106861	-0.0943401	0.0660108	0.0780108	0.518976
-0.699	-0.148482	-0.0800219	-0.0381195	0.0838295	0.084355	0.494202			0.00911543	-0.113164	0.00206502	0.037266	0.0987675	0.492195		-0.0813256	-0.107866	-0.101252	0.0645302	0.0781634	0.506763
-0.698	-0.147685	-0.0787585	-0.0320292	0.0837415	0.0850505	0.488889			0.00794486	-0.110601	0.000816485	0.0380657	0.100165	0.497717		-0.0769685	-0.10847	-0.107896	0.059124	0.0799814	0.487173
-0.697	-0.147071	-0.0773844	-0.0312431	0.0845727	0.0858539	0.487321			0.00999336	-0.110037	0.00275847	0.0367005	0.0989984	0.495395		-0.0764844	-0.110342	-0.110507	0.0617825	0.0790481	0.477944
-0.696	-0.143632	-0.0746914	-0.027025	0.083858	0.0884982	0.486906			0.00648164	-0.110262	0.00167365	0.0347625	0.0979913	0.493622		-0.0739831	-0.110585	-0.07585	0.0641186	0.0804003	0.480528
-0.695	-0.139966	-0.0728626	-0.0286339	0.0821113	0.0900519	0.493539			0.00443315	-0.109481	0.0201445	0.0367986	0.0978747	0.489048		-0.069868	-0.112117	-0.0812819	0.0629423	0.0811345	0.471263
-0.694	-0.138144	-0.0709659	-0.0351354	0.0813804	0.0915072	0.503292			0.00706693	-0.107937	0.00759591	0.0364944	0.0984735	0.477406		-0.0692225	-0.113588	-0.0891504	0.0623303	0.081246	0.478777
-0.693	-0.138508	-0.06762	-0.0411941	0.0819695	0.0931516	0.494773			0.00482334	-0.106124	-0.0104577	0.0381832	0.099617	0.47138		-0.0686577	-0.114799	-0.0934399	0.0612341	0.0810214	0.472062
-0.692	-0.141901	-0.0658998	-0.044931	0.0807087	0.0944293	0.494438			0.000433695	-0.105186	0.00107551	0.0361973	0.0990636	0.462605		-0.0696259	-0.116747	-0.0958438	0.0600715	0.0807388	0.481871
-0.691	-0.141696	-0.0632655	-0.0390204	0.0810081	0.0966776	0.500384			0.00131162	-0.10184	0.000503856	0.035614	0.100897	0.475117		-0.071159	-0.117874	-0.101292	0.0616326	0.0820889	0.469928
-0.69	-0.141355	-0.0609403	-0.0423419	0.0798891	0.0986082	0.505648			0.00287239	-0.100546	-0.0050078	0.0369701	0.102104	0.463077		-0.0738217	-0.118801	-0.0933785	0.0631379	0.0815999	0.458972
-0.689	-0.140353	-0.0585865	-0.0477078	0.0795964	0.101253	0.502308			-0.00112706	-0.101333	-0.0244554	0.0368702	0.101909	0.474952		-0.0742251	-0.120716	-0.0801073	0.0646965	0.0813451	0.449586
-0.688	-0.141081	-0.0558053	-0.052306	0.0779481	0.10285	0.508197			-0.00102952	-0.0994104	-0.0361547	0.0369215	0.101713	0.472156		-0.0714818	-0.121289	-0.0880107	0.0601623	0.0810726	0.449017
-0.687	-0.141423	-0.0522411	-0.052808	0.0777417	0.105971	0.502205			0.0043356	-0.0982696	-0.0436722	0.0375285	0.100631	0.468076		-0.0740638	-0.123194	-0.0854739	0.0611426	0.0802475	0.447424
-0.686	-0.143427	-0.0496611	-0.055533	0.0795935	0.108097	0.506302			0.00326258	-0.0968739	-0.0246872	0.0357629	0.10039	0.456692		-0.0760003	-0.125464	-0.0829076	0.0598649	0.0788929	0.458326
-0.685	-0.141355	-0.0486442	-0.0498928	0.0792075	0.108839	0.502223			0.002092	-0.0950183	-0.0250619	0.0376115	0.0987703	0.456433		-0.0745479	-0.127582	-0.0819	0.0622608	0.0775088	0.46434
-0.684	-0.138007	-0.0476521	-0.0464946	0.0779961	0.108613	0.509606			0.00326257	-0.0945932	-0.0366306	0.0337135	0.0987094	0.459257		-0.0709976	-0.129292	-0.0966216	0.060224	0.076484	0.472204
-0.683	-0.134067	-0.0477334	-0.0400417	0.0789297	0.107469	0.510769			0.00501844	-0.09411	-0.0341988	0.0374821	0.0966113	0.463311		-0.0680122	-0.130779	-0.0958508	0.0598114	0.0754008	0.477286
-0.682	-0.134546	-0.0474253	-0.035496	0.0780936	0.105912	0.517181			0.00482333	-0.0943547	-0.0372365	0.0316596	0.0958098	0.44149		-0.0629289	-0.130671	-0.0891449	0.0574156	0.0751866	0.479045
-0.681	-0.134796	-0.0462416	-0.0326157	0.0789552	0.10527	0.51728			0.00355522	-0.0936987	-0.0372338	0.0355034	0.0937101	0.451998		-0.0609924	-0.131932	-0.0907268	0.0540804	0.0742409	0.484758
-0.68	-0.132815	-0.0446548	-0.0348273	0.0802038	0.105171	0.518227			0.00540862	-0.0934485	-0.0451564	0.0352917	0.0913068	0.444322		-0.0605889	-0.133255	-0.0803998	0.0548578	0.0741476	0.495771
-0.679	-0.131426	-0.0439235	-0.0323402	0.0813309	0.104875	0.511598			0.00199446	-0.0908728	-0.0306324	0.0354236	0.0912199	0.450994		-0.0591366	-0.133363	-0.0753313	0.0537324	0.0742504	0.48682
-0.678	-0.128215	-0.042959	-0.0255	0.080426	0.105418	0.512281			0.00199446	-0.088744	-0.0407044	0.0354054	0.0892153	0.449717		-0.055667	-0.132966	-0.075965	0.0563454	0.0740576	0.47121
-0.677	-0.128625	-0.0418814	-0.0230024	0.0791448	0.105734	0.515583			0.00414051	-0.0873833	-0.0349732	0.0372476	0.0887195	0.451177		-0.0549408	-0.133908	-0.0746975	0.0513582	0.0738066	0.470379
-0.676	-0.130993	-0.0410581	-0.0206507	0.0797882	0.105624	0.520722			0.00306748	-0.0834655	-0.0290424	0.0356985	0.0889589	0.457607		-0.0562318	-0.134583	-0.0799199	0.0524868	0.0734862	0.483828
-0.675	-0.13409	-0.0404658	-0.0232696	0.0803953	0.105382	0.522973			-0.000249133	-0.0848849	-0.014694	0.0379734	0.0880722	0.467641		-0.05954	-0.135411	-0.0735951	0.0526361	0.0733077	0.484319
-0.674	-0.134204	-0.0394528	-0.0222476	0.0801228	0.105338	0.525818			-0.00220009	-0.0827788	-0.00421575	0.0363012	0.0883964	0.456572		-0.0602662	-0.135664	-0.0773246	0.0527239	0.0722873	0.479524
-0.673	-0.132246	-0.0385161	-0.0268806	0.0781973	0.104452	0.525296			-5.40404e-05	-0.0828155	0.00546783	0.0354081	0.0867569	0.460192		-0.0606696	-0.135826	-0.0770989	0.0541127	0.0707502	0.482549
-0.672	-0.133225	-0.0382125	-0.0212401	0.0773736	0.103401	0.531396			-0.00112707	-0.0814741	-0.00810446	0.0342115	0.0877091	0.474838		-0.0622834	-0.13564	-0.0814159	0.054208	0.070909	0.480355
-0.671	-0.135502	-0.0391154	-0.0222946	0.076383	0.103608	0.533486			0.00053124	-0.0804212	-0.00930052	0.0389811	0.087737	0.468091		-0.0611537	-0.135327	-0.0874098	0.0527893	0.0700221	0.464519
-0.67	-0.136641	-0.0393735	-0.0187393	0.0749898	0.10229	0.536828			0.00365277	-0.077933	-0.00610064	0.0358158	0.0892135	0.460297		-0.0645426	-0.133333	-0.0943878	0.0521501	0.0709647	0.44263
-0.669	-0.138235	-0.0399338	-0.00658089	0.0767259	0.101047	0.535748			0.00238465	-0.0789737	0.000529804	0.0360341	0.0903164	0.469817		-0.0659143	-0.131031	-0.0882701	0.0509947	0.0731462	0.446566
-0.668	-0.135548	-0.0389793	-0.00564554	0.0774452	0.100163	0.533004			0.00179936	-0.0802433	0.00717636	0.0400711	0.0914394	0.465089		-0.0630096	-0.129993	-0.0903108	0.0505472	0.0747614	0.459645
-0.667	-0.132519	-0.0385013	-0.00627313	0.0760159	0.0985802	0.531556			0.00287239	-0.0816483	0.0231915	0.038108	0.0922325	0.470271		-0.0591366	-0.128272	-0.0983318	0.0523431	0.0766666	0.46088
-0.666	-0.130993	-0.0376145	-0.00742731	0.0752013	0.0976991	0.526896			0.00648165	-0.0840141	0.018284	0.0372084	0.0914656	0.461579		-0.0563125	-0.126201	-0.111322	0.0490654	0.0769422	0.461407
-0.665	-0.13195	-0.0380338	-0.00918195	0.0757321	0.0964436	0.522586			0.00774977	-0.0856612	0.0079244	0.0372733	0.0904322	0.447407		-0.0547794	-0.124074	-0.100251	0.0474492	0.078428	0.4551
-0.664	-0.132155	-0.0380897	-0.00312357	0.0767241	0.0955509	0.518031			0.00638411	-0.0867182	0.0145529	0.0388461	0.0910395	0.471487		-0.0534077	-0.120204	-0.107965	0.0442662	0.0798109	0.438565
-0.663	-0.129877	-0.0382852	0.0033767	0.0776387	0.0938607	0.521106			0.0063841	-0.0886016	0.0106388	0.040173	0.0890768	0.469702		-0.0526816	-0.117212	-0.118821	0.0459225	0.0813742	0.437323
-0.662	-0.12867	-0.0383855	-0.00260314	0.0785826	0.0925225	0.524127			0.00570128	-0.0907678	0.0130495	0.0402558	0.0883277	0.458475		-0.0495347	-0.11526	-0.117224	0.0427508	0.0831939	0.432192
-0.661	-0.12719	-0.0373338	-0.000642743	0.0771009	0.0921634	0.518204			0.00336012	-0.0926698	0.0143473	0.0392528	0.088221	0.463941		-0.0471948	-0.110741	-0.118966	0.0447243	0.0867413	0.428185
-0.66	-0.128147	-0.0372103	-0.00225183	0.0745994	0.0910872	0.51784			0.00462825	-0.0946822	0.0213391	0.0393835	0.0867755	0.472844		-0.0467107	-0.106259	-0.117837	0.0457706	0.0917916	0.428593
-0.659	-0.130424	-0.0367231	-0.00178968	0.0748389	0.0908119	0.513356			0.00618901	-0.096406	0.0134765	0.0404684	0.0852075	0.467555		-0.0486472	-0.105035	-0.107906	0.0440547	0.0920761	0.431654
-0.658	-0.132747	-0.0366115	-0.00109197	0.0758437	0.0904229	0.513332			0.0045307	-0.0978892	0.00541636	0.0403565	0.0839157	0.46007		-0.0547794	-0.101172	-0.0984646	0.043258	0.0948203	0.410419
-0.657	-0.133407	-0.0374937	0.0100141	0.0747157	0.0894736	0.515661			-0.000249135	-0.0987056	0.00730123	0.0406726	0.0840421	0.45809		-0.0551022	-0.0980111	-0.106303	0.0457806	0.097093	0.41048
-0.656	-0.131175	-0.0371852	0.0110478	0.0713876	0.0885929	0.514831			0.00238465	-0.0998813	0.0169894	0.0395941	0.0837156	0.451832		-0.0553442	-0.0963765	-0.103356	0.0469708	0.0974251	0.417905
-0.655	-0.131585	-0.0381402	0.00200218	0.0700091	0.0877397	0.520147			0.00472579	-0.099701	0.0173276	0.0375158	0.084215	0.46174		-0.0564739	-0.0925979	-0.0920981	0.0455112	0.0996198	0.411866
-0.654	-0.133225	-0.0381362	0.00799635	0.0682869	0.0874202	0.516763			0.00706694	-0.100383	0.00375562	0.0409724	0.0835721	0.470145		-0.0587331	-0.0921483	-0.0770919	0.0471695	0.0981528	0.412404
-0.653	-0.134705	-0.0388387	0.00416552	0.0668417	0.0872731	0.509172			0.00706694	-0.101671	0.0237759	0.041004	0.0835364	0.465478		-0.0575228	-0.0920497	-0.0857657	0.0469291	0.0978352	0.404239
-0.652	-0.133726	-0.0395989	0.00583497	0.0664691	0.0875265	0.511486			0.00755468	-0.103065	0.0139879	0.0414	0.0825574	0.469569		-0.0624447	-0.0913118	-0.0949832	0.0445688	0.0974802	0.406472
-0.651	-0.131676	-0.0401864	0.00796636	0.0677065	0.0872168	0.500359			0.00999337	-0.103349	-0.00121625	0.0392567	0.0806324	0.467287		-0.0597014	-0.0924403	-0.0897132	0.045371	0.0954854	0.401984
-0.65	-0.126621	-0.0404378	0.00607794	0.0651195	0.0878164	0.492715			0.0086277	-0.103577	-0.0177821	0.0418934	0.0793787	0.490614		-0.055667	-0.0924482	-0.103503	0.0477262	0.0944756	0.400191
-0.649	-0.125915	-0.040707	0.0135383	0.0632474	0.0879544	0.497704			0.0124321	-0.103587	-0.0167412	0.0405242	0.0796559	0.483309		-0.0525202	-0.0919691	-0.097089	0.0486727	0.0929279	0.398478
-0.648	-0.12653	-0.0409177	0.01327	0.0642641	0.0883304	0.499151			0.0157487	-0.102493	-0.0204388	0.0380456	0.0816831	0.489379		-0.0524395	-0.0885718	-0.0845248	0.045904	0.0930875	0.385022
-0.647	-0.126211	-0.0410911	0.0106319	0.0652085	0.0880207	0.499838			0.0132124	-0.102972	-0.0181835	0.0386169	0.0822582	0.476929		-0.0518747	-0.086865	-0.082744	0.0430863	0.0915161	0.382769
-0.646	-0.122226	-0.0426729	0.00831973	0.0642676	0.0877274	0.500013			0.012237	-0.102759	-0.011723	0.0426448	0.081597	0.464742		-0.0496154	-0.0849201	-0.0826342	0.0406989	0.0912157	0.390527
-0.645	-0.119174	-0.0436349	0.0121957	0.0637908	0.0875647	0.502206			0.0111639	-0.102982	0.0104831	0.0420076	0.0826626	0.468379		-0.046872	-0.0833748	-0.0836861	0.0389537	0.090959	0.397697
-0.644	-0.117967	-0.0446449	0.0115303	0.0635252	0.0865666	0.501087			0.0127247	-0.103034	0.00115563	0.0366587	0.0840809	0.45627		-0.0486472	-0.0838219	-0.0869849	0.0408865	0.0903185	0.398774
-0.643	-0.119789	-0.045249	0.00571349	0.0609382	0.0851351	0.502687			0.0114566	-0.104062	-0.00520094	0.039549	0.0832591	0.452626		-0.0481631	-0.083199	-0.0766839	0.0456147	0.090083	0.399223
-0.642	-0.122203	-0.0453462	0.000871043	0.0589778	0.0850998	0.496496			0.0118468	-0.106166	-0.00530087	0.0385866	0.0832251	0.455672		-0.0511485	-0.0838866	-0.076568	0.0405291	0.088711	0.399377
-0.641	-0.121998	-0.0450935	0.011901	0.0594419	0.0856884	0.496903			0.0131149	-0.106993	-0.0102974	0.0396139	0.0827622	0.447845		-0.0558284	-0.0833242	-0.0713232	0.0413924	0.0881832	0.412533
-0.64	-0.120859	-0.0458288	0.0100384	0.0595423	0.0851255	0.491912			0.0104811	-0.106616	-0.0176684	0.0398128	0.0829868	0.465243		-0.0560704	-0.0827696	-0.0682404	0.0433585	0.0887478	0.406558
-0.639	-0.119721	-0.045601	0.0061248	0.0560252	0.0858622	0.491447			0.0107737	-0.108216	-0.0122233	0.037733	0.0827881	0.451658		-0.0551829	-0.0800973	-0.0586609	0.0448474	0.0882925	0.407169
-0.638	-0.119789	-0.0451083	0.00435692	0.0541042	0.0855433	0.489086			0.0126271	-0.108851	-0.0104639	0.0358767	0.0817523	0.453814		-0.0576035	-0.079603	-0.0555319	0.0450533	0.0891761	0.408553
-0.637	-0.120951	-0.044722	0.00223182	0.0545685	0.0849381	0.494513			0.0183824	-0.110421	-0.0050345	0.0374978	0.0819938	0.457352		-0.0613151	-0.0791613	-0.0598318	0.0460327	0.0906315	0.418091
-0.636	-0.120928	-0.0452907	0.013492	0.0542564	0.0843283	0.4926			0.0150658	-0.111856	0.0141842	0.0401508	0.0808361	0.459893		-0.0631709	-0.0802856	-0.0542452	0.0448157	0.0897031	0.414825
-0.635	-0.117626	-0.0453021	0.017206	0.0531481	0.0832452	0.500295			0.0167241	-0.113456	0.0140158	0.0384813	0.0798397	0.458209		-0.0639778	-0.0800272	-0.0627346	0.0431665	0.088118	0.418396
-0.634	-0.113117	-0.0451766	0.0186215	0.0529983	0.0827219	0.493516			0.0207236	-0.114158	-0.0133964	0.0381896	0.0799878	0.461839		-0.0604276	-0.0808988	-0.0632602	0.0443768	0.0863361	0.43888
-0.633	-0.110771	-0.0437027	0.0203815	0.0539936	0.0822282	0.491528			0.0201383	-0.115154	-0.0104902	0.0390475	0.0794952	0.458377		-0.0563125	-0.0804837	-0.0525211	0.0479648	0.0853508	0.428343
-0.632	-0.108745	-0.0432609	0.0186204	0.0515579	0.0821829	0.494997			0.0209187	-0.116656	-0.00897386	0.0370218	0.0793567	0.439353		-0.0525202	-0.0814964	-0.0553112	0.0486618	0.083332	0.436654
-0.631	-0.108448	-0.0432358	0.0183751	0.0501835	0.0826563	0.491748			0.0249181	-0.117363	-0.00991296	0.0364475	0.0786423	0.442287		-0.0541339	-0.0825243	-0.0552978	0.045692	0.081687	0.438251
-0.63	-0.106376	-0.0428017	0.0119849	0.0523075	0.0826317	0.489482			0.0241378	-0.119103	-0.0231712	0.0378404	0.07843	0.443802		-0.0530043	-0.0828652	-0.0554882	0.0423995	0.0797855	0.43182
-0.629	-0.102619	-0.0409476	0.0162002	0.0524404	0.0841876	0.491965			0.0197481	-0.12036	-0.0406703	0.0394788	0.0787208	0.457573		-0.0500189	-0.0828684	-0.0731031	0.0443657	0.0794383	0.42618
-0.628	-0.099385	-0.0406832	0.0217595	0.0498485	0.0850407	0.479767			0.0207236	-0.12165	-0.0365639	0.0367032	0.0784623	0.451871		-0.0484051	-0.0832148	-0.069591	0.0430066	0.0777875	0.416744
-0.627	-0.0978365	-0.040421	0.0272841	0.0497215	0.08559	0.483436			0.0249181	-0.121415	-0.0438056	0.0352745	0.0799698	0.432801		-0.0477596	-0.0828863	-0.0505281	0.0423427	0.0770565	0.423195
-0.626	-0.100592	-0.0398681	0.0331078	0.0510266	0.0868212	0.480197			0.0206261	-0.12212	-0.0416785	0.033367	0.0795355	0.42583		-0.0518747	-0.0835021	-0.0336565	0.0452973	0.0766683	0.432954
-0.625	-0.101366	-0.0406244	0.0388018	0.0492082	0.0874544	0.483691			0.0210162	-0.122266	-0.0507025	0.0342344	0.0816091	0.419022		-0.0524395	-0.0835221	-0.0316523	0.041583	0.0755766	0.439897
-0.624	-0.100592	-0.0418698	0.0367085	0.0492997	0.087574	0.49066			0.0202359	-0.122819	-0.0532399	0.0373476	0.0829084	0.420393		-0.0548601	-0.0820825	-0.0359639	0.040752	0.0752587	0.435046
-0.623	-0.0989523	-0.0424418	0.0325324	0.0504404	0.0872547	0.485207			0.0198457	-0.122949	-0.0349237	0.0351004	0.0854153	0.431714		-0.0551022	-0.0833833	-0.0347048	0.0405877	0.0728996	0.421541
-0.622	-0.0967206	-0.0436522	0.0365328	0.050359	0.0863997	0.478038			0.0199432	-0.124453	-0.0258924	0.0341607	0.0863979	0.438626		-0.0564739	-0.0845593	-0.0365557	0.0414463	0.0724554	0.428773
-0.621	-0.0972672	-0.0444391	0.0304744	0.0501587	0.0860225	0.479689			0.0221868	-0.126206	-0.0459174	0.0341675	0.0862259	0.449324		-0.0583297	-0.0849049	-0.0366329	0.0402769	0.0714135	0.431683
-0.62	-0.0981781	-0.0443683	0.0303978	0.0506962	0.0867062	0.470428			0.0267715	-0.127653	-0.0569808	0.0345011	0.0857966	0.453699		-0.0602662	-0.0863984	-0.0324542	0.0400642	0.0701515	0.42576
-0.619	-0.0985652	-0.0451344	0.0209911	0.0512447	0.0869516	0.475941			0.0232598	-0.129576	-0.0460511	0.0357434	0.0843442	0.461656		-0.0605889	-0.0878861	-0.0183518	0.0399572	0.0697698	0.417319
-0.618	-0.093487	-0.0465097	0.018533	0.0493684	0.0864311	0.473436			0.0231623	-0.131515	-0.0478341	0.037038	0.0823328	0.450733		-0.0573614	-0.087071	-0.0285085	0.0400287	0.0700394	0.419275
-0.617	-0.0893651	-0.0476241	0.0116179	0.0498429	0.0866842	0.468911			0.0273568	-0.132398	-0.0454354	0.0358573	0.0800739	0.440846		-0.0538112	-0.0876273	-0.0324316	0.0396087	0.0697033	0.424055
-0.616	-0.0862909	-0.0491268	0.00892001	0.0520212	0.0858311	0.471984			0.0287225	-0.132889	-0.0529853	0.0373701	0.077824	0.451381		-0.0488892	-0.0869496	-0.0258621	0.0419352	0.0713685	0.433104
-0.615	-0.0863136	-0.0505041	0.0105362	0.0512723	0.0848299	0.475161			0.0302833	-0.134181	-0.0549774	0.0359208	0.0758234	0.454715		-0.0480824	-0.0874565	-0.0133074	0.0431252	0.0724826	0.426475
-0.614	-0.0853344	-0.0519378	0.0148557	0.0492709	0.0841404	0.474883			0.0280397	-0.134293	-0.0475921	0.0362639	0.0736658	0.453707		-0.0471948	-0.0872634	-0.000420064	0.0390245	0.0733581	0.420797
-0.613	-0.0820324	-0.0530983	0.0135655	0.0491034	0.0836755	0.472165			0.0293078	-0.134844	-0.0665108	0.0381402	0.0722184	0.453338		-0.045339	-0.0890557	-0.0101481	0.038878	0.0729954	0.423079
-0.612	-0.0776373	-0.0537178	0.013021	0.0492956	0.0834042	0.464643			0.0244304	-0.134496	-0.0734789	0.0387385	0.0716892	0.446555		-0.0420308	-0.0899395	-0.0060948	0.0408891	0.0730466	0.431173
-0.611	-0.0754512	-0.0543855	0.0131038	0.0489194	0.0838864	0.454478			0.0234549	-0.134625	-0.0691373	0.0366088	0.072792	0.440178		-0.0384806	-0.0916559	-0.0257687	0.0386672	0.0726917	0.422148
-0.61	-0.0755878	-0.0555702	0.0136854	0.0483393	0.0837643	0.452953			0.0280397	-0.131777	-0.0462426	0.0355429	0.0761059	0.442007		-0.0386419	-0.0935015	-0.0319651	0.0390475	0.0710649	0.421919
-0.609	-0.0782066	-0.0564229	0.0145931	0.0495914	0.083971	0.454058			0.0278446	-0.130731	-0.0357662	0.0347889	0.0781784	0.448771		-0.0416274	-0.0946245	-0.031509	0.0384086	0.0695521	0.42535
-0.608	-0.0794819	-0.0573654	0.0158802	0.0483435	0.0848183	0.460317			0.0228696	-0.129152	-0.0414179	0.0351422	0.0801893	0.461962		-0.0438866	-0.0960939	-0.0433752	0.0356626	0.0701959	0.418451
-0.607	-0.0772274	-0.0586293	0.0239831	0.0489854	0.0841077	0.464535			0.0205285	-0.127655	-0.030017	0.0403773	0.0827342	0.459162		-0.0446935	-0.0982897	-0.0381152	0.037893	0.0695242	0.410738
-0.606	-0.0752235	-0.0600636	0.0337434	0.0489557	0.084101	0.46968			0.0221868	-0.124306	-0.026043	0.0373008	0.0859904	0.45832		-0.044048	-0.100193	-0.038458	0.0368557	0.0700704	0.413556
-0.605	-0.0745403	-0.0613112	0.0376827	0.0511621	0.0839589	0.470896			0.0233574	-0.122471	-0.0155714	0.036905	0.087463	0.459805		-0.0442901	-0.0995428	-0.0490368	0.0374228	0.0735389	0.395748
-0.604	-0.076066	-0.0629942	0.0363273	0.0522227	0.0832641	0.470564			0.0232598	-0.122749	-0.0178806	0.0370417	0.0885916	0.456868		-0.0431604	-0.101703	-0.0349931	0.0359575	0.073422	0.38258
-0.603	-0.0767492	-0.0646927	0.0345003	0.0523555	0.0830858	0.472158			0.026674	-0.122326	-0.016051	0.0378182	0.0900896	0.455024		-0.0452583	-0.100613	-0.0449635	0.0360961	0.0744167	0.39029
-0.602	-0.074973	-0.0663887	0.0227443	0.0519479	0.0828065	0.473485			0.0234549	-0.123368	-0.0323095	0.0354046	0.089621	0.474086		-0.047921	-0.101626	-0.0597164	0.0355396	0.0752132	0.394181
-0.601	-0.0706234	-0.0667054	0.0161332	0.0512173	0.0830926	0.478171			0.0239427	-0.124255	-0.0424098	0.0388337	0.0890635	0.48101		-0.0391261	-0.103041	-0.0540295	0.0387695	0.0759763	0.395571
-0.6	-0.0664105	-0.0688843	0.0211992	0.0515201	0.0822173	0.479724			0.0244304	-0.122964	-0.0444595	0.0363065	0.0888266	0.497388		-0.0371896	-0.104216	-0.0508154	0.0377418	0.0755992	0.399025
-0.599	-0.0650442	-0.0709293	0.0229443	0.0532619	0.082084	0.470244			0.0290151	-0.122499	-0.0423735	0.0388481	0.0884056	0.485976		-0.0326711	-0.105269	-0.0525884	0.0360468	0.0762417	0.389682
-0.598	-0.0654313	-0.0726595	0.0265237	0.0533583	0.0821194	0.473929			0.0267716	-0.122665	-0.0511674	0.0380004	0.0885305	0.484116		-0.0323483	-0.107545	-0.0651293	0.0386893	0.0748429	0.389146
-0.597	-0.0643155	-0.0747486	0.022026	0.050643	0.0819524	0.474637			0.0250157	-0.121785	-0.0628056	0.0371848	0.0902265	0.484574		-0.0265388	-0.109221	-0.0665616	0.0386356	0.0749317	0.383851
-0.596	-0.0598748	-0.0769236	0.0224796	0.0492797	0.0811387	0.4731			0.024528	-0.12197	-0.0614023	0.0362533	0.0894198	0.486863		-0.0270229	-0.110447	-0.057227	0.0402977	0.074052	0.388234
-0.595	-0.0571421	-0.0782932	0.0247777	0.0487204	0.0809539	0.47427			0.0217966	-0.122216	-0.0542326	0.0375673	0.0884911	0.497142		-0.0250864	-0.111205	-0.06629	0.0407054	0.0726501	0.382974
-0.594	-0.0555709	-0.0804944	0.016113	0.0485745	0.0801979	0.46968			0.0202359	-0.123277	-0.0665957	0.0369118	0.0882296	0.475398		-0.0200031	-0.111867	-0.059646	0.0393884	0.072061	0.389473
-0.593	-0.0575976	-0.0823736	0.015761	0.048253	0.0797869	0.465576			0.0214064	-0.122816	-0.0866812	0.0379475	0.0877631	0.472407		-0.0212941	-0.113009	-0.0679461	0.0373752	0.071332	0.390228
-0.592	-0.0584629	-0.0843744	0.0186826	0.0487999	0.0795069	0.468354			0.021504	-0.12329	-0.0886977	0.0383964	0.086582	0.462626		-0.0213748	-0.113468	-0.0723769	0.0357689	0.0711635	0.388995
-0.591	-0.0608085	-0.0866175	0.0204131	0.047276	0.0789047	0.467132			0.0185775	-0.124061	-0.0964979	0.0390843	0.0860688	0.461022		-0.0279912	-0.114575	-0.0770376	0.0395267	0.0716002	0.396144
-0.59	-0.0577798	-0.0889523	0.0192606	0.047212	0.0780886	0.468389			0.0134075	-0.121516	-0.0844373	0.0389581	0.0879957	0.468095		-0.0264581	-0.114834	-0.0859971	0.0407976	0.071121	0.391469
-0.589	-0.0556619	-0.0911511	0.0203749	0.0473409	0.0773796	0.466363			0.0158462	-0.118697	-0.0941854	0.0348	0.0909692	0.472154		-0.0254092	-0.114105	-0.0912011	0.0410516	0.0732955	0.400907
-0.588	-0.0577115	-0.093036	0.0199756	0.0485095	0.0766988	0.460038			0.0192604	-0.117583	-0.0868792	0.0387193	0.0917386	0.487486		-0.0267002	-0.115322	-0.0913934	0.0418891	0.0737078	0.404718
-0.587	-0.0589412	-0.0948373	0.0241262	0.0495001	0.0763392	0.464147			0.0175045	-0.117346	-0.0779162	0.0386849	0.0929242	0.495784		-0.0268616	-0.115708	-0.0906469	0.0398817	0.0750919	0.413155
-0.586	-0.0594194	-0.0971	0.0254155	0.0494997	0.07543	0.461739			0.0193579	-0.116907	-0.0791311	0.0370417	0.0940747	0.510824		-0.0284753	-0.113983	-0.0963021	0.0403227	0.0786298	0.409482
-0.585	-0.0571194	-0.0990072	0.029533	0.0484268	0.0750472	0.463544			0.0190653	-0.117289	-0.0709289	0.0357351	0.0937418	0.517405		-0.0275877	-0.114933	-0.0913415	0.0388463	0.0792737	0.396893
-0.584	-0.0522233	-0.10089	0.0383339	0.047615	0.0744098	0.458838			0.0176021	-0.118256	-0.0653144	0.0360357	0.0923749	0.531284		-0.0239568	-0.114427	-0.0940362	0.042542	0.0810444	0.393998
-0.583	-0.0492401	-0.102126	0.0362234	0.0473554	0.0735952	0.454669			0.0182849	-0.119363	-0.0619602	0.0352202	0.0917457	0.544766		-0.0180666	-0.115152	-0.091282	0.0400624	0.0817416	0.392001
-0.582	-0.0489213	-0.103839	0.0321568	0.0483009	0.0728931	0.454332			0.0199432	-0.118773	-0.0616012	0.039289	0.0921364	0.54773		-0.0155653	-0.116347	-0.0965018	0.0378888	0.0823428	0.397195
-0.581	-0.049149	-0.105395	0.0267561	0.0483978	0.0721104	0.44972			0.0222844	-0.119769	-0.0574317	0.0397592	0.0911283	0.548124		-0.0135481	-0.117366	-0.0881999	0.0383885	0.0822086	0.400955
-0.58	-0.0478282	-0.106313	0.0175555	0.0453003	0.0714412	0.451618			0.0168217	-0.119322	-0.0557506	0.0340786	0.0901738	0.544705		-0.0121764	-0.119102	-0.104757	0.0412627	0.0809377	0.40555
-0.579	-0.0441619	-0.107243	0.0154675	0.0451036	0.0704923	0.458679			0.0161389	-0.118612	-0.0408489	0.0351689	0.0909135	0.541411		-0.00959444	-0.120869	-0.118319	0.0403153	0.0801272	0.404331
-0.578	-0.0414975	-0.107746	0.0175424	0.0434806	0.0702536	0.468078			0.0161389	-0.116762	-0.044887	0.0357891	0.0921639	0.539176		-0.00806137	-0.122071	-0.12017	0.0409867	0.0800319	0.398954
-0.577	-0.0416113	-0.108028	0.0235331	0.042922	0.0701434	0.473276			0.0138953	-0.115473	-0.0394238	0.038412	0.0941676	0.517646		-0.00668969	-0.123215	-0.124888	0.0404109	0.0803357	0.399003
-0.576	-0.043752	-0.107604	0.0297023	0.0431394	0.071666	0.476431			0.0132124	-0.113458	-0.0411906	0.0373908	0.095976	0.502264		-0.00604419	-0.124712	-0.131482	0.0383622	0.0796497	0.392835
-0.575	-0.0454371	-0.107776	0.0243607	0.0438053	0.071735	0.476728			0.0132124	-0.112636	-0.044486	0.0370255	0.097317	0.515875		-0.009191	-0.125908	-0.125229	0.0388172	0.0801313	0.396964
-0.574	-0.0460747	-0.107141	0.0229467	0.0428598	0.0726857	0.473608			0.0127247	-0.111251	-0.0340807	0.0377717	0.0985733	0.51342		-0.0120958	-0.127182	-0.133936	0.0424945	0.0796247	0.393328
-0.573	-0.0438886	-0.105487	0.0230441	0.0413982	0.0744564	0.4785			0.0084326	-0.110442	-0.020482	0.0386652	0.0996603	0.518277		-0.0154039	-0.128628	-0.143675	0.0437643	0.0795498	0.398373
-0.572	-0.0436381	-0.103085	0.0201582	0.041886	0.0769542	0.475722			0.0084326	-0.109534	-0.0312215	0.0371456	0.0996575	0.521726		-0.0125799	-0.129827	-0.141098	0.0415686	0.0785484	0.414961
-0.571	-0.0447312	-0.101588	0.0275931	0.0418825	0.0779193	0.474819			0.0126271	-0.108861	-0.0299891	0.0383866	0.0987277	0.501131		-0.015646	-0.129986	-0.144743	0.0402776	0.0795639	0.420896
-0.57	-0.0472589	-0.0997466	0.0200369	0.0418269	0.0795403	0.475118			0.0115541	-0.108783	-0.0336698	0.0387722	0.0987574	0.506591		-0.0153233	-0.13156	-0.127617	0.0406276	0.0787494	0.409903
-0.569	-0.0476916	-0.0972233	0.0237731	0.0431989	0.081768	0.485995			0.0112615	-0.107988	-0.0274598	0.0369772	0.0982572	0.489064		-0.016937	-0.132906	-0.135846	0.038805	0.0786257	0.412404
-0.568	-0.0445262	-0.0947298	0.0187637	0.0420969	0.0834059	0.485967			0.00999335	-0.105538	-0.0203672	0.0339715	0.0991126	0.473254		-0.0159688	-0.134875	-0.130333	0.040677	0.0781667	0.416749
-0.567	-0.0408143	-0.091594	0.018034	0.0419873	0.085716	0.482423			0.0126271	-0.10436	-0.00652041	0.0337	0.0986797	0.47303		-0.0125799	-0.136708	-0.129754	0.0417352	0.0771573	0.422517
-0.566	-0.0383321	-0.0880511	0.0220306	0.0419655	0.0880881	0.48459			0.0107737	-0.103004	-0.0168426	0.0333635	0.0990194	0.447032		-0.0079	-0.136486	-0.126434	0.0410253	0.0773178	0.430629
-0.565	-0.038947	-0.0857441	0.0230357	0.0426008	0.0894777	0.4819			0.0124321	-0.0990424	-0.00153826	0.0397502	0.101541	0.446311		-0.0059635	-0.137302	-0.130403	0.0372561	0.0770211	0.443667
-0.564	-0.0398351	-0.0823322	0.0300326	0.0437127	0.091925	0.483961			0.0136026	-0.0990908	0.00471555	0.0359944	0.100947	0.454697		-0.00547938	-0.138552	-0.142731	0.038508	0.0765391	0.448352
-0.563	-0.0384004	-0.0789257	0.0258016	0.0438763	0.0942569	0.48165			0.011359	-0.0991531	-0.00249744	0.033891	0.100695	0.439216		-0.00346219	-0.140132	-0.12907	0.0379649	0.076155	0.450448
-0.562	-0.0351895	-0.0759173	0.0239273	0.0435175	0.0962597	0.492175			0.00931052	-0.0985689	-0.00629816	0.0332205	0.101426	0.429419		-0.00249395	-0.141527	-0.131581	0.0377335	0.0753385	0.453643
-0.561	-0.0341192	-0.0737378	0.0186287	0.0430861	0.0983907	0.48784			0.0103836	-0.0968127	0.00296829	0.0366795	0.100433	0.447932		0.000330117	-0.143709	-0.11755	0.0377251	0.07459	0.449331
-0.56	-0.0358271	-0.0697602	0.0267836	0.0428764	0.101624	0.487112			0.00989582	-0.0952585	0.00608952	0.0358759	0.100145	0.423131		-0.00104157	-0.144949	-0.103836	0.0367667	0.074229	0.457726
-0.559	-0.0391064	-0.0665802	0.0260117	0.0441227	0.103704	0.495383			0.00609146	-0.0949038	0.0158174	0.0345722	0.0997097	0.414479		-0.00144501	-0.14611	-0.112565	0.0367848	0.0738384	0.447551
-0.558	-0.0409965	-0.0644188	0.0302941	0.0439744	0.105491	0.492538			0.00394541	-0.0937148	0.0136105	0.034444	0.0989427	0.414151		-0.00354288	-0.146866	-0.108522	0.0364686	0.0745672	0.461491
-0.557	-0.0413153	-0.0632912	0.0330697	0.0452341	0.10658	0.499786			0.00726203	-0.0927851	0.00983118	0.0356753	0.0973209	0.409559		-0.00773863	-0.148154	-0.11479	0.0401559	0.073994	0.47632
-0.556	-0.0401539	-0.0624636	0.0269739	0.0441129	0.106434	0.500192			0.0045307	-0.0923144	0.00757557	0.0341358	0.0958822	0.41246		-0.00822276	-0.147625	-0.107136	0.0399174	0.0753819	0.477392
-0.555	-0.0413381	-0.062171	0.0281072	0.0429473	0.105311	0.494234			0.00414051	-0.0917644	0.00276365	0.0352662	0.0940561	0.412478		-0.00806138	-0.149116	-0.110327	0.039797	0.0751643	0.482314
-0.554	-0.0439797	-0.0620639	0.0344838	0.0424529	0.104173	0.496895			0.00804241	-0.090378	0.0222793	0.0355611	0.0938472	0.404054		-0.00927169	-0.149768	-0.112704	0.0373283	0.0752313	0.489724
-0.553	-0.0462114	-0.0603351	0.0391379	0.043859	0.104073	0.503545			0.0082375	-0.0896845	0.0145527	0.0339032	0.0924263	0.410511		-0.0120151	-0.149193	-0.0967906	0.0363834	0.0765464	0.50132
-0.552	-0.0460747	-0.0588369	0.0426827	0.0449386	0.104076	0.504167			0.00804241	-0.0874807	0.0175794	0.0377333	0.0911246	0.4127		-0.0127413	-0.150369	-0.0990511	0.0354484	0.0753147	0.501573
-0.551	-0.0431143	-0.0578331	0.0421959	0.0448683	0.103594	0.498959			0.00804241	-0.0848533	0.0157936	0.0356157	0.0901094	0.409188		-0.0108854	-0.150755	-0.0931809	0.0349335	0.0752549	0.497901
-0.55	-0.0394935	-0.0568423	0.0436803	0.045017	0.103601	0.497036			0.0106762	-0.0807713	0.0195678	0.034374	0.0889397	0.420678		-0.00604419	-0.151042	-0.0934708	0.0364055	0.0744476	0.496862
-0.549	-0.039744	-0.0560216	0.0497772	0.0454264	0.102696	0.502961			0.0114566	-0.0803176	0.0164528	0.0345719	0.0896999	0.411172		-0.00475319	-0.151091	-0.0958743	0.0342344	0.0729984	0.500077
-0.548	-0.0416569	-0.0550441	0.0514087	0.045754	0.102904	0.499462			0.0109688	-0.0790987	0.00230102	0.0376333	0.0889741	0.401555		-0.000638129	-0.151844	-0.0958865	0.0340281	0.0718188	0.500753
-0.547	-0.0413153	-0.0542639	0.0457056	0.0486726	0.102734	0.496631			0.0123345	-0.0779439	0.00678429	0.0363329	0.0898654	0.413949		-0.00273601	-0.151069	-0.0836834	0.0326429	0.0706034	0.506687
-0.546	-0.0400628	-0.052576	0.041774	0.0505134	0.102131	0.496819			0.00979826	-0.0770997	0.0234688	0.0344916	0.09052	0.434105		-0.00136432	-0.149934	-0.0749707	0.0297012	0.0701565	0.498766
-0.545	-0.0384915	-0.051811	0.0440738	0.0502292	0.101982	0.492201			0.00794487	-0.0773872	0.031381	0.0375004	0.0899001	0.432771		0.00105631	-0.147369	-0.0741228	0.0334472	0.0713644	0.497614
-0.544	-0.0382866	-0.0507655	0.0424608	0.0491857	0.101738	0.483747			0.0065792	-0.0751052	0.0351092	0.0385373	0.0902366	0.435157		0.00339624	-0.14489	-0.0983262	0.0314763	0.0746197	0.47997
-0.543	-0.0404727	-0.0501367	0.0435224	0.0505974	0.101738	0.482567			0.0115541	-0.0764617	0.0485375	0.0386719	0.0901909	0.421019		0.00154043	-0.142217	-0.104843	0.0315305	0.0769225	0.459862
-0.542	-0.0446629	-0.0494311	0.0394399	0.0502736	0.100743	0.485463			0.0080424	-0.0760896	0.0466626	0.0362461	0.091448	0.42832		-0.000718818	-0.139088	-0.106535	0.0310435	0.0773136	0.467125
-0.541	-0.0464847	-0.0486667	0.0464973	0.0523385	0.101261	0.490134			0.00570127	-0.0777256	0.0512346	0.0373018	0.09047	0.431378		-0.00217119	-0.136435	-0.120686	0.0308768	0.0779416	0.479942
-0.54	-0.0464619	-0.0474244	0.0411023	0.051666	0.101399	0.493312			0.00774977	-0.0802035	0.0322206	0.0382164	0.0889175	0.431153		-0.00556007	-0.131735	-0.121347	0.032317	0.080306	0.480134
-0.539	-0.0474866	-0.0473174	0.0396411	0.0504532	0.100857	0.488882			0.00716448	-0.0816344	0.0300068	0.0363464	0.0884351	0.431121		-0.0079	-0.128855	-0.117052	0.0320863	0.0824786	0.481325
-0.538	-0.0490807	-0.0468907	0.050563	0.0482581	0.101003	0.491678			0.00657919	-0.0827695	0.0323984	0.0394173	0.0881424	0.436791		-0.00741587	-0.125526	-0.125474	0.0357628	0.0839826	0.48148
-0.537	-0.0516312	-0.0471866	0.0527248	0.0470607	0.0998493	0.492139			0.00911543	-0.0845408	0.0299855	0.0388643	0.087015	0.416195		-0.00935238	-0.121819	-0.134402	0.0345162	0.086441	0.474806
-0.536	-0.0534075	-0.0462516	0.0562674	0.0482111	0.0991832	0.494445			0.0104811	-0.087088	0.022434	0.0381356	0.0860498	0.40425		-0.0137902	-0.116358	-0.13589	0.0312663	0.0937539	0.475265
-0.535	-0.0534758	-0.0454269	0.0503144	0.0484804	0.0978413	0.491987			0.0111639	-0.0890112	0.0275532	0.0407723	0.0855252	0.390859		-0.0119344	-0.114655	-0.143752	0.032138	0.0947411	0.482642
-0.534	-0.0498322	-0.0455362	0.0490146	0.0484965	0.0971724	0.488693			0.00921299	-0.0912756	0.023453	0.0422529	0.0844136	0.402341		-0.00999788	-0.11154	-0.143352	0.0326574	0.0970255	0.482198
-0.533	-0.047054	-0.0452476	0.0470875	0.0479764	0.0966122	0.485927			0.0137977	-0.0928597	0.0230956	0.0386532	0.0825571	0.399642		-0.00572143	-0.109273	-0.134509	0.0351161	0.0997923	0.475103
-0.532	-0.0479649	-0.0452065	0.0499244	0.0483943	0.0956392	0.481028			0.015456	-0.0947719	0.0193708	0.0393153	0.0813566	0.415		-0.00418838	-0.106553	-0.127975	0.0328187	0.0995849	0.468555
-0.531	-0.0503787	-0.0443772	0.0532893	0.0495167	0.0947698	0.481227			0.0146757	-0.0948616	0.0330439	0.0396327	0.0818992	0.425541		-0.00233257	-0.102313	-0.138846	0.0327204	0.100987	0.470951
-0.53	-0.0494451	-0.0441044	0.0551702	0.0505888	0.0945756	0.47704			0.0152609	-0.0963051	0.0215902	0.0401328	0.0813804	0.416635		-0.00241325	-0.102067	-0.146997	0.0284217	0.0995594	0.480766
-0.529	-0.04735	-0.0436777	0.0517416	0.0510859	0.0937689	0.477485			0.0130173	-0.096335	0.0106973	0.0421199	0.0809506	0.417506		-0.00120294	-0.101122	-0.137498	0.0291736	0.0994917	0.48897
-0.528	-0.0463936	-0.0438771	0.0521881	0.052154	0.0932941	0.471793			0.0119443	-0.097263	0.0155685	0.0409614	0.0809442	0.421365		0.000572183	-0.0996363	-0.12944	0.0283153	0.0986814	0.476891
-0.527	-0.0462797	-0.0438936	0.0509454	0.0489644	0.0921849	0.470897			0.0114566	-0.0987383	0.00686696	0.0386384	0.080508	0.441598		0.00145975	-0.100662	-0.114357	0.0315384	0.0970207	0.47209
-0.526	-0.0492401	-0.0432968	0.0491954	0.0483757	0.0907067	0.472145			0.0138953	-0.0998312	-0.00573824	0.0416923	0.0797955	0.439394		-0.000718813	-0.101418	-0.135027	0.0327347	0.0950884	0.458747
-0.525	-0.0522461	-0.0429211	0.046203	0.0493954	0.0898776	0.476798			0.0138953	-0.100193	-0.0118369	0.0409246	0.077953	0.426261		-0.00668969	-0.100193	-0.143185	0.0309711	0.0938014	0.452455
-0.524	-0.0530203	-0.0423042	0.0515102	0.0496799	0.0892973	0.485219			0.0103836	-0.0994901	-0.0219208	0.0404232	0.0787021	0.413335		-0.00911032	-0.0987082	-0.139677	0.0312615	0.0928416	0.454909
-0.523	-0.0510847	-0.0428698	0.0561252	0.0463922	0.0890322	0.478157			0.0124321	-0.0988745	-0.0224283	0.0402357	0.0794745	0.431343		-0.00959444	-0.0953164	-0.14169	0.0316325	0.0918418	0.460578
-0.522	-0.0521094	-0.0426743	0.0611942	0.0442553	0.0889833	0.484933			0.0110664	-0.0980936	-0.0359248	0.0392673	0.0807901	0.414942		-0.0119344	-0.0930523	-0.125763	0.0326817	0.0925657	0.46992
-0.521	-0.054751	-0.042995	0.0684181	0.0437102	0.0887314	0.486437			0.016334	-0.0993267	-0.0358153	0.0384826	0.0809112	0.421837		-0.0126606	-0.090925	-0.136967	0.0335717	0.0924334	0.473742
-0.52	-0.0564134	-0.0419898	0.0687321	0.0415725	0.0902565	0.483201			0.0142855	-0.0992122	-0.0347474	0.042635	0.0805786	0.427229		-0.0154039	-0.0907172	-0.154343	0.035174	0.0918135	0.48176
-0.519	-0.0568916	-0.0427265	0.0705015	0.0415078	0.0898556	0.486756			0.0177972	-0.0993835	-0.035957	0.03963	0.0816491	0.42777		-0.0181473	-0.0903525	-0.163381	0.0321088	0.0917562	0.492038
-0.518	-0.0548421	-0.0427723	0.0636936	0.0419044	0.0899608	0.484786			0.0188702	-0.100248	-0.0366101	0.040781	0.0823129	0.425509		-0.0172597	-0.0902133	-0.171146	0.0304209	0.0903373	0.499178
-0.517	-0.0500827	-0.0430159	0.0587917	0.0414946	0.0907703	0.484381			0.0180898	-0.101716	-0.0334648	0.0418855	0.0814114	0.432193		-0.0138709	-0.090054	-0.169062	0.0374388	0.0891648	0.491721
-0.516	-0.048648	-0.0438655	0.0554791	0.0397171	0.0899803	0.481828			0.0198457	-0.103522	-0.0360686	0.0398984	0.0812917	0.426418		-0.00943306	-0.0898893	-0.179138	0.0382274	0.0878133	0.496285
-0.515	-0.0493312	-0.0445981	0.0551896	0.0384535	0.0891152	0.476829			0.0238451	-0.104048	-0.0487066	0.0392134	0.080497	0.410862		-0.0109661	-0.0880582	-0.193426	0.0376631	0.0874936	0.491846
-0.514	-0.0493995	-0.0459043	0.0566389	0.0410536	0.0886599	0.477102			0.0247231	-0.104019	-0.0421868	0.0381832	0.0811194	0.412616		-0.0108047	-0.0873137	-0.191737	0.037405	0.0872758	0.49415
-0.513	-0.0470767	-0.0460985	0.0606558	0.0399861	0.0882122	0.485191			0.0202359	-0.105604	-0.0532228	0.0413603	0.0812364	0.414182		-0.00749656	-0.0877644	-0.201064	0.033434	0.0876614	0.520025
-0.512	-0.0429777	-0.046232	0.0485405	0.0398663	0.0876399	0.476224			0.0216015	-0.106376	-0.0516432	0.0429092	0.0803788	0.432339		-0.00668969	-0.0873255	-0.20152	0.032829	0.0877087	0.521173
-0.511	-0.0425906	-0.0464295	0.0469582	0.040414	0.0871912	0.475538			0.0227721	-0.108062	-0.0659828	0.0378848	0.0808769	0.427342		-0.00580213	-0.0870718	-0.203925	0.0328107	0.0860146	0.514274
-0.51	-0.0424995	-0.0463192	0.0487741	0.0399235	0.0871046	0.472526			0.0193579	-0.108981	-0.06518	0.0370067	0.0794536	0.446279		-0.00612487	-0.0871786	-0.206748	0.0358037	0.0865895	0.522163
-0.509	-0.045551	-0.045378	0.0504985	0.0374547	0.0872194	0.477322			0.0213089	-0.111037	-0.0568804	0.036655	0.0784992	0.452951		-0.00668969	-0.0877838	-0.212895	0.0355465	0.0846908	0.527189
-0.508	-0.0471906	-0.04556	0.0496273	0.0387845	0.085771	0.486479			0.0224794	-0.111696	-0.0560675	0.0370925	0.0783788	0.454155		-0.0150812	-0.0898618	-0.205264	0.0336594	0.0832786	0.538574
-0.507	-0.0472134	-0.0449772	0.0481637	0.0382495	0.085629	0.49237			0.019553	-0.113232	-0.0584891	0.0360601	0.0774114	0.451501		-0.0145164	-0.0905093	-0.190339	0.0331829	0.0819973	0.538958
-0.506	-0.0445262	-0.0445546	0.041415	0.036719	0.0851271	0.491749			0.0194555	-0.115107	-0.0601421	0.0355217	0.0769354	0.448666		-0.0153232	-0.0908147	-0.19044	0.0351909	0.0795605	0.531478
-0.505	-0.0445262	-0.043943	0.0315841	0.0362318	0.084794	0.486249			0.0214064	-0.116106	-0.0675339	0.0355342	0.0756293	0.461904		-0.0158074	-0.0897924	-0.19742	0.0330493	0.0789555	0.53367
-0.504	-0.0455054	-0.042906	0.0344012	0.0365483	0.0842737	0.489698			0.0278446	-0.116412	-0.0651613	0.0352325	0.0770045	0.479109		-0.0191156	-0.0905	-0.187417	0.0337413	0.0774269	0.544945
-0.503	-0.0480104	-0.0418309	0.0357122	0.0368754	0.0848399	0.491939			0.0244304	-0.117994	-0.0573049	0.0381663	0.0757649	0.470863		-0.0208907	-0.0886808	-0.163226	0.0339612	0.0787103	0.544599
-0.502	-0.0462114	-0.0398362	0.0327667	0.0365275	0.0863343	0.498705			0.0244304	-0.119368	-0.0509491	0.0392035	0.0754839	0.456071		-0.0204066	-0.0895708	-0.16348	0.0319609	0.0782442	0.544142
-0.501	-0.0424311	-0.0395651	0.0362298	0.0355282	0.0869854	0.491809			0.0281372	-0.119729	-0.0687923	0.0368914	0.0766471	0.464634		-0.0221817	-0.0892607	-0.16192	0.0333602	0.0777167	0.549949
-0.5	-0.038446	-0.038856	0.0295948	0.0382914	0.0878563	0.487639			0.0279421	-0.12127	-0.0707357	0.037708	0.0763572	0.453642		-0.0150005	-0.0881551	-0.151482	0.0352412	0.0779099	0.54516
-0.499	-0.036738	-0.0387282	0.0248981	0.0377904	0.0884015	0.485968			0.027747	-0.121484	-0.0662313	0.0364513	0.0778736	0.448763		-0.0133867	-0.0890321	-0.156911	0.0377806	0.0761709	0.549154
-0.498	-0.0363737	-0.0382027	0.0321132	0.0371995	0.0892533	0.479973			0.0316489	-0.123244	-0.0669267	0.0388685	0.0776287	0.431928		-0.0120151	-0.0897169	-0.159503	0.0387292	0.0763852	0.555405
-0.497	-0.0357133	-0.0377222	0.0312521	0.0374675	0.0900304	0.472918			0.0319416	-0.123451	-0.0601314	0.0375763	0.0798965	0.433015		-0.0140322	-0.0910338	-0.169006	0.0337677	0.0756149	0.545323
-0.496	-0.0325251	-0.0377816	0.0261327	0.038359	0.0897507	0.473282			0.0292102	-0.125819	-0.0574815	0.0397475	0.0797649	0.438814		-0.00781931	-0.0924511	-0.162878	0.0352117	0.0748294	0.54738
-0.495	-0.0292459	-0.0388444	0.0263112	0.0364422	0.0896632	0.46989			0.028625	-0.127739	-0.0610422	0.0371378	0.0797019	0.430971		-0.00902962	-0.0937093	-0.162241	0.0348957	0.0756369	0.537026
-0.494	-0.0277202	-0.0394218	0.0318827	0.0366748	0.0897087	0.46414			0.0313563	-0.129463	-0.0631805	0.036537	0.0791693	0.430533		-0.00588281	-0.0930527	-0.161897	0.0335882	0.0758031	0.5495
-0.493	-0.0296103	-0.0399559	0.0371954	0.0380729	0.0892622	0.463418			0.0274544	-0.13153	-0.0805517	0.0354501	0.0779452	0.428256		-0.00806137	-0.093008	-0.172082	0.0353036	0.0750855	0.543153
-0.492	-0.0324341	-0.040444	0.0354208	0.0376752	0.0896046	0.467337			0.0280397	-0.133606	-0.10103	0.0338453	0.0763457	0.416656		-0.00773863	-0.0927452	-0.175932	0.03131	0.0755481	0.536728
-0.491	-0.031637	-0.0414872	0.037334	0.0376798	0.0894636	0.468524			0.0260887	-0.134867	-0.113181	0.0384573	0.0745184	0.406301		-0.0124992	-0.0927972	-0.16361	0.0301951	0.0766781	0.512859
-0.49	-0.0308628	-0.0416203	0.0382582	0.037359	0.0892264	0.471113			0.027747	-0.135818	-0.110955	0.0371198	0.0733046	0.400508		-0.0142743	-0.092086	-0.161559	0.0319848	0.0771561	0.523844
-0.489	-0.0286311	-0.0427065	0.0372001	0.0387043	0.0894365	0.475924			0.0269666	-0.137066	-0.106443	0.0358859	0.0717967	0.397254		-0.0131447	-0.093945	-0.162343	0.0326132	0.0766249	0.530373
-0.488	-0.0295875	-0.0436664	0.0394762	0.0399724	0.0894524	0.473869			0.028625	-0.137532	-0.0951204	0.035553	0.0703961	0.388041		-0.0120957	-0.0954925	-0.170243	0.0307768	0.076861	0.5312
-0.487	-0.0315004	-0.0448174	0.0422297	0.041189	0.0889965	0.471045			0.030771	-0.137218	-0.0843076	0.0396782	0.068904	0.400507		-0.0141129	-0.0967931	-0.163692	0.0274939	0.07633	0.529502
-0.486	-0.0328895	-0.0466286	0.0327909	0.0423586	0.0884665	0.47706			0.0301857	-0.136497	-0.0782316	0.0375568	0.0685038	0.414014		-0.0180666	-0.098222	-0.166139	0.0297172	0.0750916	0.518182
-0.485	-0.0294736	-0.0472952	0.0393852	0.0421454	0.0880024	0.475472			0.0296004	-0.13425	-0.0665948	0.0384067	0.0720824	0.42426		-0.0135481	-0.0995059	-0.173239	0.0288793	0.0736964	0.5066
-0.484	-0.0258984	-0.0480148	0.0351414	0.0420442	0.0878303	0.47667			0.0311612	-0.132069	-0.0616249	0.0381496	0.0741978	0.407621		-0.0108854	-0.101319	-0.173043	0.0304765	0.0734709	0.501938
-0.483	-0.022232	-0.0487405	0.0373052	0.0437066	0.0882682	0.476785			0.033795	-0.130279	-0.0522373	0.0397995	0.0775679	0.411984		-0.0059635	-0.103186	-0.171282	0.0322142	0.0730747	0.496874
-0.482	-0.0213211	-0.049502	0.0431825	0.0447424	0.0883885	0.475979			0.0338925	-0.127177	-0.0411943	0.0403419	0.0823515	0.40151		-0.00459182	-0.104805	-0.183591	0.0319087	0.0731262	0.489866
-0.481	-0.0213667	-0.0505386	0.0424942	0.043321	0.0879164	0.467719			0.0315514	-0.124779	-0.0454742	0.0375313	0.0864445	0.395151		-0.000315379	-0.104322	-0.173718	0.0311842	0.0747987	0.502524
-0.48	-0.0192488	-0.0520108	0.0420673	0.0422623	0.0875285	0.465654			0.0336974	-0.122769	-0.0366564	0.0391172	0.0899709	0.389364		-0.00104156	-0.104872	-0.158329	0.0301256	0.0760695	0.508036
-0.479	-0.0158557	-0.0530643	0.0488278	0.0406573	0.086626	0.466222			0.028625	-0.121478	-0.0367593	0.0386911	0.0928264	0.371654		0.00258938	-0.104954	-0.158584	0.0370544	0.0767973	0.494471
-0.478	-0.0134646	-0.0536256	0.0412261	0.0402859	0.0866742	0.471281			0.0281372	-0.120961	-0.0292311	0.0365566	0.0945734	0.372288		0.00589756	-0.105967	-0.169421	0.0345884	0.0784303	0.484243
-0.477	-0.0115517	-0.0552427	0.0452966	0.0416947	0.0858096	0.47015			0.0302833	-0.121337	-0.036367	0.0389963	0.0958432	0.389177		0.00638169	-0.106772	-0.168988	0.0326005	0.0790658	0.475075
-0.476	-0.014831	-0.0564758	0.0508162	0.0423869	0.0858272	0.474375			0.0282348	-0.121842	-0.0242412	0.0380903	0.0953034	0.384052		0.00581687	-0.107706	-0.173222	0.0333967	0.0780992	0.483581
-0.475	-0.0177914	-0.0579305	0.0491137	0.0401344	0.0858006	0.470292			0.0260887	-0.123261	-0.0282149	0.0361318	0.0947505	0.394181		0.00073356	-0.109269	-0.162868	0.0318529	0.0768048	0.474782
-0.474	-0.0171993	-0.0597354	0.0429449	0.0405135	0.0851925	0.474759			0.0228697	-0.122359	-0.0333698	0.0368151	0.0944911	0.405179		0.00129837	-0.110888	-0.169397	0.0338083	0.0764311	0.476878
-0.473	-0.015628	-0.060143	0.0347671	0.0402908	0.0848835	0.462081			0.025601	-0.121966	-0.030437	0.0387585	0.0940215	0.405227		0.000733558	-0.112346	-0.161859	0.0346624	0.0755116	0.466168
-0.472	-0.0148537	-0.0618784	0.0275527	0.0423163	0.084812	0.462313			0.0257961	-0.122866	-0.0277376	0.0357288	0.0931314	0.400641		0.000733556	-0.113643	-0.166059	0.0350606	0.0748039	0.46778
-0.471	-0.0168805	-0.0633332	0.0379698	0.0440567	0.0848753	0.467551			0.0240402	-0.121651	-0.0255147	0.039578	0.0943881	0.398184		-0.000476756	-0.114563	-0.152048	0.031666	0.0737695	0.469865
-0.47	-0.0182241	-0.0651191	0.0302617	0.0447452	0.0845735	0.467915			0.0271617	-0.122266	-0.022458	0.0379755	0.0935464	0.401533		-0.000799504	-0.11335	-0.160911	0.0308559	0.0743826	0.460246
-0.469	-0.0185201	-0.0674615	0.0303487	0.0443111	0.0840862	0.459296			0.0264789	-0.122821	-0.0137784	0.0362384	0.0918181	0.4072		-0.00346219	-0.114549	-0.148999	0.0323288	0.0730566	0.47404
-0.468	-0.0145122	-0.0693364	0.0289694	0.0443535	0.0833252	0.454956			0.0240402	-0.124157	-0.0250197	0.0386849	0.0909412	0.416166		0.000410804	-0.114709	-0.148026	0.0351414	0.0733176	0.48126
-0.467	-0.0107547	-0.0709097	0.0230566	0.0451955	0.0825935	0.455558			0.0271617	-0.12339	-0.00897375	0.0370438	0.0897277	0.414535		0.00492931	-0.115344	-0.148591	0.0355748	0.0732726	0.494826
-0.466	-0.00850024	-0.0727016	0.0240088	0.0453838	0.082063	0.458044			0.0269666	-0.123093	-0.00120006	0.0398834	0.0887138	0.411203		0.00726925	-0.114857	-0.141902	0.0323023	0.0734255	0.490578
-0.465	-0.00911509	-0.0743261	0.0201054	0.0462027	0.0817782	0.459551			0.0285274	-0.12171	-0.00853651	0.0395614	0.0900906	0.420019		0.00968987	-0.115922	-0.138289	0.0325803	0.0733841	0.486754
-0.464	-0.00802201	-0.0763697	0.030569	0.0429265	0.0812484	0.460198			0.0263814	-0.119785	-0.0188091	0.0357037	0.0920939	0.426119		0.0117071	-0.115611	-0.127391	0.0319696	0.0744776	0.483934
-0.463	-0.00563091	-0.0778921	0.0379665	0.0431261	0.0809017	0.455774			0.0255034	-0.115831	-0.00800894	0.0342584	0.094891	0.444069		0.0150959	-0.116482	-0.130758	0.0355415	0.075289	0.490411
-0.462	-0.00319426	-0.0799542	0.0368775	0.0405251	0.0804773	0.447908			0.0234549	-0.116425	-0.010166	0.0361463	0.0955395	0.445287		0.0154994	-0.114966	-0.132779	0.0378985	0.0781895	0.472752
-0.461	-0.00130415	-0.0822373	0.0379683	0.0393686	0.0799323	0.443735			0.022577	-0.115772	-0.00680774	0.0353836	0.0959236	0.431296		0.0191303	-0.116768	-0.134756	0.0370436	0.0779238	0.47466
-0.46	-0.000825928	-0.083975	0.0370115	0.0406762	0.0795488	0.439377			0.020431	-0.114737	-0.000636131	0.0373528	0.0967047	0.448131		0.0182427	-0.115482	-0.144321	0.0320696	0.0792784	0.480869
-0.459	-0.00512992	-0.0853066	0.0425247	0.0405481	0.0789815	0.439455			0.0228696	-0.115175	0.00107781	0.0388342	0.0961527	0.448111		0.0167097	-0.116816	-0.140739	0.0345132	0.0796945	0.489154
-0.458	-0.00727053	-0.0872899	0.0377019	0.0387989	0.0782422	0.437841			0.0188702	-0.11614	0.0017367	0.0388466	0.0951279	0.443883		0.0113036	-0.117294	-0.152836	0.0360662	0.0806428	0.485161
-0.457	-0.00592695	-0.0889691	0.0401499	0.0386617	0.0778852	0.445723			0.0147732	-0.116434	0.0122816	0.0382787	0.0943285	0.444834		0.0125946	-0.118651	-0.164112	0.0384996	0.0804779	0.484734
-0.456	-0.00383189	-0.0908659	0.04147	0.0390906	0.0773318	0.449229			0.0158462	-0.11666	0.0275688	0.0378639	0.0943016	0.455678		0.0125946	-0.120325	-0.183207	0.0372592	0.0800537	0.474945
-0.455	-0.00522101	-0.0924597	0.0396423	0.0388352	0.0764174	0.450486			0.0176996	-0.117927	0.0197027	0.0388874	0.0930939	0.446655		0.0118684	-0.121523	-0.180506	0.0363745	0.0789094	0.480502
-0.454	-0.00702003	-0.0939144	0.0422041	0.0407382	0.0758608	0.454875			0.0192604	-0.118519	0.0195642	0.0412132	0.0922574	0.447245		0.0102547	-0.122492	-0.179853	0.0327379	0.0792642	0.492431
-0.453	-0.00920618	-0.0950546	0.0367188	0.0395281	0.0754128	0.453917			0.0194555	-0.11722	0.036656	0.0398007	0.0927523	0.450165		0.0069465	-0.124354	-0.172674	0.0354891	0.078169	0.497461
-0.452	-0.00777152	-0.0962373	0.0294169	0.0389178	0.074732	0.457976			0.0171143	-0.115723	0.0256005	0.0364904	0.0925295	0.457977		0.008883	-0.125755	-0.180893	0.0361478	0.0777194	0.486995
-0.451	-0.00428734	-0.0973281	0.0318184	0.0384293	0.0738255	0.451272			0.0179923	-0.115638	0.0251426	0.0355684	0.0931389	0.44898		0.0100933	-0.127103	-0.176063	0.0404901	0.077648	0.485843
-0.45	-0.000712065	-0.0984054	0.0250659	0.039231	0.0730503	0.447925			0.01848	-0.113624	0.0237551	0.0345878	0.0949316	0.444428		0.0157414	-0.127912	-0.173938	0.037418	0.0777185	0.485963
-0.449	0.000130515	-0.098721	0.0287798	0.0393897	0.0722957	0.451774			0.0198457	-0.111755	0.0150257	0.0395726	0.0958366	0.447375		0.0172745	-0.129456	-0.189919	0.0318102	0.0773567	0.478703
-0.448	-0.000256616	-0.0988899	0.0273166	0.038639	0.0713931	0.444746			0.0217966	-0.111027	-0.00137263	0.0395971	0.0958885	0.445291		0.0187269	-0.130266	-0.19544	0.0335122	0.0765069	0.483882
-0.447	-0.00037048	-0.0989989	0.0273482	0.0373255	0.0713088	0.449136			0.0173094	-0.110354	0.00441145	0.0353967	0.0977277	0.439778		0.0206634	-0.130452	-0.200629	0.0341268	0.0770456	0.477801
-0.446	0.00318202	-0.0991373	0.0246789	0.036806	0.0712098	0.441915			0.0162364	-0.108751	0.0118958	0.0326947	0.0976376	0.431393		0.0227612	-0.132115	-0.186392	0.0346607	0.0770204	0.474342
-0.445	0.00507213	-0.0983357	0.0201295	0.0350675	0.0717456	0.447831			0.0167241	-0.108211	-0.00104258	0.0363539	0.0966342	0.431328		0.0237295	-0.133475	-0.178989	0.0345287	0.0761045	0.47982
-0.444	0.0060058	-0.0967788	0.0180383	0.0348	0.0727385	0.440941			0.0149683	-0.108209	-0.0103745	0.0356883	0.0962562	0.421471		0.0251012	-0.135011	-0.186641	0.0357954	0.0755453	0.478244
-0.443	0.00345529	-0.0950251	0.0118304	0.0351752	0.0739851	0.438612			0.014383	-0.106419	-0.00452784	0.0362623	0.0965086	0.418826		0.0250205	-0.135995	-0.176038	0.0327101	0.0750474	0.476691
-0.442	0.00104141	-0.0918062	0.0131403	0.0348462	0.0774412	0.435449			0.0117492	-0.104778	-0.0126597	0.0369597	0.0982553	0.411603		0.0210668	-0.136247	-0.163817	0.0332204	0.0751708	0.478771
-0.441	-0.00105366	-0.0899435	0.0180021	0.035327	0.0784368	0.444255			0.0117492	-0.103734	-0.0187954	0.0373429	0.0976625	0.405294		0.0192917	-0.136228	-0.1695	0.0354172	0.0761071	0.475603
-0.44	-0.000211075	-0.0873493	0.0207178	0.0341302	0.0807186	0.442982			0.00794486	-0.103678	-0.0210892	0.0365743	0.0983514	0.391824		0.0173552	-0.137634	-0.167376	0.0352212	0.076173	0.469047
-0.439	0.000130512	-0.0844342	0.0245776	0.0343983	0.0837943	0.4493			0.00950562	-0.0999763	-0.0419615	0.0371502	0.101	0.389946		0.0175166	-0.138669	-0.151699	0.0343957	0.0763774	0.48412
-0.438	-0.00107643	-0.0804453	0.0230632	0.0336648	0.0865687	0.443929			0.0132124	-0.100071	-0.0447306	0.0365151	0.0995287	0.392839		0.0142084	-0.140189	-0.17048	0.0347714	0.0763357	0.473281
-0.437	-0.00351308	-0.0776014	0.026687	0.0343372	0.0890044	0.439212			0.0136026	-0.0992961	-0.0481543	0.0409567	0.0985445	0.390776		0.0133208	-0.142056	-0.176264	0.0325639	0.0753251	0.471978
-0.436	-0.00492497	-0.0740323	0.0374768	0.0332132	0.0929283	0.435151			0.00999336	-0.0979366	-0.0448656	0.035808	0.0995163	0.394531		0.0100933	-0.142843	-0.17202	0.0330236	0.0745207	0.479054
-0.435	-0.00344476	-0.071042	0.0366582	0.034756	0.0949405	0.447587			0.0112615	-0.0948713	-0.0486569	0.0351282	0.09979	0.400553		0.0115457	-0.14326	-0.178619	0.0328272	0.075293	0.480059
-0.434	-0.000575432	-0.0670543	0.0284551	0.0345775	0.0975288	0.455216			0.0141879	-0.0932417	-0.0546654	0.0341833	0.0991545	0.40026		0.0144504	-0.144965	-0.18029	0.033404	0.074832	0.483237
-0.433	0.00213449	-0.0637477	0.033322	0.0343751	0.0998136	0.456532			0.0140904	-0.0928196	-0.0544216	0.0343985	0.0991463	0.40605		0.0180007	-0.145883	-0.189453	0.0351673	0.0748637	0.471245
-0.432	0.00101864	-0.0604571	0.0307106	0.0349078	0.102626	0.458279			0.0150658	-0.0910732	-0.0389458	0.0375004	0.0983838	0.418774		0.0219544	-0.146646	-0.193494	0.0318444	0.0755278	0.479062
-0.431	3.94245e-05	-0.0567827	0.0341993	0.0358775	0.105339	0.463137			0.0185776	-0.0915023	-0.0386018	0.0380268	0.0970154	0.417628		0.0205827	-0.147828	-0.192497	0.0326621	0.0748888	0.485969
-0.43	0.000517644	-0.054474	0.0329273	0.0363575	0.107456	0.460026			0.0132124	-0.0900268	-0.0387299	0.0342846	0.0962857	0.426045		0.0225192	-0.148655	-0.186932	0.0320867	0.0748711	0.481084
-0.429	0.00222558	-0.0534507	0.0364401	0.0375509	0.108026	0.458747			0.0108713	-0.0896257	-0.0345984	0.032818	0.0943581	0.440431		0.0245364	-0.149082	-0.191452	0.0311068	0.0745306	0.479898
-0.428	0.00498104	-0.0519262	0.0417192	0.0377109	0.108121	0.455546			0.011359	-0.0863376	-0.0278354	0.0371697	0.0941446	0.443209		0.0274411	-0.149858	-0.190847	0.030205	0.0743221	0.489504
-0.427	0.00416124	-0.0510611	0.0399803	0.0380374	0.107806	0.450587			0.012237	-0.0858827	-0.0142404	0.035579	0.0927217	0.452259		0.0259081	-0.150494	-0.199126	0.0307672	0.0739874	0.487874
-0.426	0.000631508	-0.0505577	0.0357177	0.0382605	0.106082	0.459221			0.0120419	-0.0833575	0.00125313	0.0358904	0.0933355	0.44843		0.0222771	-0.150418	-0.178332	0.0299166	0.0735906	0.481515
-0.425	-0.00303485	-0.0492099	0.0298015	0.0392279	0.105408	0.461067			0.00931053	-0.0815475	-0.0182969	0.0351331	0.0936014	0.452958		0.0192917	-0.151272	-0.173024	0.0293678	0.0729966	0.486725
-0.424	-0.00326258	-0.0479258	0.027866	0.0398084	0.104882	0.469239			0.0103835	-0.0787845	-0.032017	0.0363605	0.0934922	0.453419		0.0174359	-0.151564	-0.166988	0.0299285	0.071891	0.484088
-0.423	-0.00353584	-0.046719	0.028948	0.0393694	0.104381	0.477556			0.00667675	-0.078255	-0.0388229	0.0359074	0.0950699	0.457185		0.0148539	-0.15118	-0.164529	0.0287773	0.0705849	0.48214
-0.422	-0.00264772	-0.0454753	0.0252649	0.0377389	0.104086	0.476679			0.00696939	-0.0768045	-0.0313922	0.0368177	0.094313	0.452726		0.0155801	-0.149925	-0.157784	0.0316725	0.0700076	0.495209
-0.421	-0.00647349	-0.0447846	0.0267814	0.0366956	0.103189	0.479929			0.0115541	-0.076305	-0.0253828	0.0361997	0.0949574	0.46185		0.0146925	-0.147311	-0.154849	0.0316575	0.0714799	0.496644
-0.42	-0.00938836	-0.0435555	0.026044	0.0376095	0.102389	0.483029			0.0137977	-0.0753923	-0.0337971	0.0367652	0.0944038	0.469206		0.0108195	-0.143412	-0.159157	0.0317953	0.0743467	0.481789
-0.419	-0.0111874	-0.0432456	0.0369394	0.0376356	0.101307	0.484217			0.0105786	-0.0742908	-0.0260842	0.0376428	0.0949071	0.472197		0.0117071	-0.141583	-0.170191	0.0286022	0.0760573	0.485077
-0.418	-0.00843192	-0.0426452	0.031778	0.0391398	0.100774	0.47696			0.00901789	-0.0735454	-0.0311179	0.040265	0.0957298	0.45346		0.0110616	-0.137551	-0.177423	0.0279193	0.0786298	0.474334
-0.417	-0.00592695	-0.0401399	0.0263762	0.0401363	0.10077	0.477004			0.0146756	-0.0746025	-0.0359907	0.0365045	0.0960354	0.445832		0.014047	-0.134423	-0.180351	0.0282815	0.0796912	0.466697
-0.416	-0.00487942	-0.0395381	0.0231732	0.0403516	0.100367	0.470107			0.0150658	-0.0742825	-0.0447408	0.0371013	0.0961366	0.441829		0.0154994	-0.131008	-0.185808	0.0317671	0.0830342	0.469146
-0.415	-0.00690616	-0.0389687	0.0291456	0.040669	0.100111	0.472091			0.0157487	-0.0762452	-0.041273	0.0414644	0.0952978	0.460424		0.0185655	-0.128628	-0.186373	0.0331145	0.0844244	0.469607
-0.414	-0.00740716	-0.0376594	0.0295108	0.0414156	0.100044	0.4793			0.0172119	-0.0786691	-0.0429677	0.0396056	0.0939765	0.458689		0.0183234	-0.123933	-0.198005	0.031413	0.0868633	0.464707
-0.413	-0.00731606	-0.036264	0.0251828	0.0453195	0.100792	0.477021			0.0158462	-0.080359	-0.0402356	0.039667	0.0925231	0.439872		0.0196951	-0.122118	-0.193267	0.0241805	0.088306	0.462533
-0.412	-0.00579031	-0.0352765	0.0139161	0.0463689	0.10066	0.475866			0.0119443	-0.0811495	-0.0302769	0.040993	0.0918475	0.423507		0.0213089	-0.117496	-0.179081	0.0279205	0.0931293	0.456948
-0.411	-0.00510714	-0.0336348	0.0145394	0.0451608	0.101891	0.481412			0.0123345	-0.0837424	-0.0209341	0.0405263	0.0904966	0.399629		0.0244557	-0.113929	-0.184432	0.0261858	0.0953735	0.458176
-0.41	-0.00626853	-0.0331322	0.0244113	0.0453155	0.102127	0.484588			0.0166266	-0.0857987	-0.030019	0.0418304	0.089093	0.387861		0.0216316	-0.111158	-0.184993	0.0273193	0.0968032	0.461946
-0.409	-0.0109824	-0.0330572	0.0238528	0.0461463	0.101264	0.487379			0.0150658	-0.0883538	-0.0255526	0.0391883	0.0885165	0.388211		0.0170324	-0.108601	-0.169443	0.0270494	0.0992745	0.466305
-0.408	-0.0143755	-0.0330272	0.0222209	0.0455064	0.100632	0.489676			0.010286	-0.090928	-0.0167607	0.038936	0.0874714	0.387684		0.0167904	-0.10484	-0.162495	0.0279328	0.10007	0.468127
-0.407	-0.0131914	-0.0328135	0.0178744	0.0468174	0.0993864	0.49967			0.00979827	-0.0926124	0.00120071	0.0395934	0.0852389	0.404614		0.0122719	-0.102653	-0.165955	0.0281408	0.0998037	0.474765
-0.406	-0.0144438	-0.0323078	0.0153113	0.0449487	0.0984085	0.499365			0.00892035	-0.0944271	0.0195297	0.0377875	0.0836862	0.39878		0.0109809	-0.100947	-0.171224	0.0262215	0.100383	0.464193
-0.405	-0.0165844	-0.0322122	0.0121366	0.0434462	0.0975674	0.501305			0.0110664	-0.0951687	0.0316011	0.0393496	0.0828803	0.394289		0.00912506	-0.100089	-0.163521	0.0321638	0.100071	0.45626
-0.404	-0.0183379	-0.0328879	0.013006	0.0406462	0.0960229	0.49473			0.0130173	-0.0951385	0.0186394	0.0393062	0.0838529	0.40923		0.00856025	-0.0995911	-0.152432	0.0329858	0.0993425	0.474955
-0.403	-0.0205241	-0.0321878	0.0100208	0.0408792	0.0949536	0.490174			0.0185776	-0.0962579	0.0240273	0.0394142	0.0827827	0.414674		0.00468724	-0.100075	-0.154225	0.0295564	0.0979515	0.477555
-0.402	-0.0216855	-0.0317292	0.00753231	0.0415047	0.0930303	0.488835			0.0183825	-0.0979622	0.0149007	0.0397434	0.081431	0.419594		0.00121768	-0.100224	-0.137898	0.0280498	0.0958373	0.480856
-0.401	-0.0183607	-0.0309995	0.0102861	0.0408421	0.0922372	0.485597			0.0156511	-0.099821	0.000842048	0.0424003	0.0811357	0.427716		0.00605894	-0.0986063	-0.14716	0.0297894	0.095921	0.478494
-0.4	-0.0162656	-0.0301143	0.0141664	0.0399834	0.0915777	0.486127			0.01848	-0.101111	0.0107089	0.0382318	0.0793001	0.418815		0.00872162	-0.0959178	-0.144784	0.0307034	0.0949162	0.470526
-0.399	-0.0168349	-0.03008	0.0116551	0.040428	0.0905827	0.488681			0.021504	-0.102593	0.0229145	0.0403524	0.0770611	0.40945		0.0119491	-0.0936649	-0.146571	0.0354066	0.0945511	0.459701
-0.398	-0.0189528	-0.029503	0.00865792	0.0412894	0.0901847	0.477995			0.0230648	-0.101965	0.0128911	0.0410775	0.0777507	0.412835		0.0120298	-0.0917787	-0.130196	0.0337691	0.0950481	0.453785
-0.397	-0.018429	-0.0295272	0.00423282	0.0407735	0.0896714	0.468673			0.0205285	-0.101613	0.0155199	0.040007	0.0768634	0.430173		0.0112229	-0.0901466	-0.135991	0.0329234	0.0942308	0.455774
-0.396	-0.0152636	-0.0278563	-0.00294701	0.0432824	0.0900991	0.46216			0.0222844	-0.101714	0.00433319	0.0417444	0.0782893	0.433287		0.0134015	-0.0885581	-0.135586	0.0279724	0.0942191	0.444056
-0.395	-0.0145805	-0.0274011	-0.00813581	0.0434075	0.0897289	0.459105			0.0208212	-0.101659	-0.00755142	0.0422998	0.0780789	0.434663		0.0142891	-0.0897065	-0.114482	0.0294972	0.0938721	0.431673
-0.394	-0.0140567	-0.0273232	-0.010755	0.0417586	0.0897867	0.464962			0.0196506	-0.101062	-0.010674	0.0396955	0.0778379	0.437345		0.0155801	-0.0891475	-0.121185	0.0314696	0.0936738	0.451871
-0.393	-0.015628	-0.0269846	-0.0198056	0.0394971	0.0901253	0.465403			0.0221868	-0.102105	0.000221933	0.041365	0.0786865	0.434837		0.0139663	-0.089989	-0.130553	0.0316388	0.0921374	0.459179
-0.392	-0.0187934	-0.0277652	-0.0143047	0.040532	0.0904225	0.463856			0.0228696	-0.103136	-0.00900266	0.0398053	0.0795774	0.441292		0.010174	-0.0895067	-0.12081	0.0312151	0.0913353	0.47189
-0.391	-0.0215488	-0.0282132	-0.00987196	0.0401825	0.0903928	0.465095			0.0179923	-0.104864	-0.0104336	0.040853	0.078992	0.456039		0.00622031	-0.08864	-0.135252	0.0310298	0.0906138	0.467488
-0.39	-0.0203874	-0.0288592	-0.0109584	0.0389036	0.090373	0.461722			0.0190653	-0.106674	-0.020215	0.0413753	0.0787584	0.4499		0.00509068	-0.0875452	-0.12938	0.0298451	0.0905417	0.471357
-0.389	-0.0194765	-0.0290786	-0.0161109	0.0367209	0.0901611	0.461774			0.0179923	-0.107448	-0.028152	0.0367145	0.077798	0.446848		0.00363831	-0.0886043	-0.128609	0.0308018	0.0903579	0.480554
-0.388	-0.0210251	-0.0296976	-0.0160742	0.0357924	0.0898697	0.463069			0.0221868	-0.106029	-0.0276715	0.037422	0.0784809	0.466182		0.00129837	-0.0874724	-0.142811	0.0334111	0.0918837	0.474987
-0.387	-0.0230518	-0.0295642	-0.0198128	0.0332673	0.0887178	0.461477			0.0220893	-0.108386	-0.0193702	0.0391402	0.0774966	0.474083		-0.00152569	-0.0863209	-0.146231	0.0332152	0.0896761	0.472476
-0.386	-0.0242588	-0.03062	-0.0186327	0.0325497	0.0876831	0.464949			0.0247231	-0.109567	-0.0218291	0.0399881	0.0773549	0.487069		-0.00184844	-0.0863059	-0.135682	0.0310711	0.0893098	0.480409
-0.385	-0.0229607	-0.0306439	-0.0126925	0.0334738	0.0874846	0.467748			0.0251132	-0.110863	-0.0292785	0.0397575	0.0774837	0.486356		-0.00426907	-0.0870478	-0.121662	0.0288829	0.088453	0.489229
-0.384	-0.0184973	-0.0308743	-0.0205813	0.0334232	0.0866641	0.465504			0.0256985	-0.112038	-0.0338295	0.0401501	0.0770638	0.477702		-0.00104157	-0.0884143	-0.120946	0.0314098	0.0877504	0.482025
-0.383	-0.0167211	-0.0305001	-0.0239767	0.0325607	0.087285	0.468307			0.0270642	-0.113179	-0.0411297	0.0384226	0.0765735	0.481682		0.00154044	-0.0895128	-0.123558	0.0370864	0.0858392	0.49301
-0.382	-0.0163567	-0.0300798	-0.0234171	0.0324074	0.0868241	0.468212			0.0294053	-0.1147	-0.0327843	0.0379918	0.0761316	0.476631		0.00226663	-0.0904629	-0.116284	0.037746	0.084125	0.498884
-0.381	-0.0159924	-0.0294183	-0.0279896	0.0330091	0.0869211	0.472977			0.0324293	-0.116728	-0.0385962	0.036229	0.0755482	0.471903		0.00557482	-0.0879534	-0.130864	0.0363419	0.0837518	0.498595
-0.38	-0.0150131	-0.0297418	-0.0360677	0.0332152	0.0866186	0.474282			0.0302833	-0.118221	-0.0351063	0.037731	0.0750968	0.469462		0.00541344	-0.0888658	-0.12527	0.0341007	0.0812749	0.510933
-0.379	-0.0123032	-0.0294736	-0.0393397	0.0327495	0.0865394	0.480505			0.0308685	-0.119627	-0.0398556	0.0392855	0.07445	0.467976		0.007592	-0.0873067	-0.136196	0.0333353	0.0812689	0.518618
-0.378	-0.0102765	-0.0292339	-0.0309703	0.0342886	0.0853054	0.473189			0.0298931	-0.119697	-0.0504037	0.0364107	0.0748109	0.464275		0.00702718	-0.0883845	-0.1262	0.0319366	0.0808161	0.506736
-0.377	-0.00984381	-0.0295743	-0.031289	0.0332838	0.0844447	0.466833			0.0284299	-0.120617	-0.0379805	0.0357383	0.074014	0.457394		0.00896369	-0.0877903	-0.118628	0.0344134	0.0802164	0.512431
-0.376	-0.0120527	-0.0292216	-0.0306386	0.0320761	0.0844446	0.464625			0.0300882	-0.121207	-0.0463121	0.0338947	0.0761076	0.442815		0.00686581	-0.0876379	-0.117828	0.0337826	0.0799585	0.507334
-0.375	-0.01433	-0.029047	-0.023785	0.0317726	0.0850363	0.461362			0.0324293	-0.121425	-0.0453352	0.0365492	0.0770416	0.43202		0.00275075	-0.0885873	-0.112804	0.0325713	0.0784739	0.521052
-0.374	-0.0143983	-0.0280985	-0.0253537	0.0326633	0.0850779	0.461989			0.0289176	-0.123078	-0.0484561	0.0362751	0.0771212	0.420449		0.00323487	-0.0887929	-0.130786	0.028995	0.0772841	0.526423
-0.373	-0.0128042	-0.0265018	-0.0222775	0.0338749	0.085957	0.470219			0.0272593	-0.123149	-0.030224	0.0374019	0.0798592	0.409052		0.000733562	-0.090119	-0.119757	0.0310206	0.0760173	0.532432
-0.372	-0.011324	-0.0258742	-0.0255312	0.0339252	0.0871819	0.467485			0.0284299	-0.123776	-0.00554841	0.0361166	0.0810095	0.398735		0.000249435	-0.0912083	-0.115259	0.0301634	0.0743432	0.551136
-0.371	-0.0132369	-0.025397	-0.0242455	0.0348258	0.087173	0.464041			0.0317465	-0.125094	0.00191199	0.0355445	0.0822447	0.407191		-0.002736	-0.0931045	-0.115844	0.0294437	0.0736173	0.563552
-0.37	-0.0145349	-0.0258277	-0.0274409	0.0342705	0.0869437	0.462485			0.0306735	-0.12686	-0.0107547	0.0382487	0.0821442	0.404647		-0.00386563	-0.0930554	-0.113593	0.029863	0.0735242	0.563227
-0.369	-0.0132369	-0.0265313	-0.0325437	0.0351885	0.0868849	0.460318			0.0322342	-0.128242	-0.0157819	0.0384876	0.0814359	0.413535		-0.00402701	-0.0936236	-0.112998	0.0282698	0.0744987	0.548995
-0.368	-0.0106864	-0.0267223	-0.0307802	0.0353077	0.0867298	0.465843			0.0325269	-0.129984	-0.0202544	0.0384274	0.0802743	0.424116		-0.00362357	-0.094136	-0.116808	0.0260837	0.0736991	0.555717
-0.367	-0.00717943	-0.0266851	-0.0334859	0.0364999	0.0865686	0.470221			0.0354533	-0.132077	-0.0141373	0.0395526	0.0791633	0.429425		-0.000154	-0.0943933	-0.127391	0.0304845	0.0744017	0.550801
-0.366	-0.0050616	-0.0265282	-0.0384619	0.0380341	0.0867895	0.468559			0.0326244	-0.133798	-0.00489658	0.0370691	0.0774577	0.431219		0.00452588	-0.0932539	-0.116384	0.0332123	0.0750777	0.542144
-0.365	-0.00435565	-0.0267256	-0.0359814	0.0372801	0.0872675	0.46209			0.0382822	-0.13442	-0.00460649	0.0379231	0.0754956	0.422178		0.00678513	-0.0943845	-0.104843	0.0349827	0.0740123	0.542601
-0.364	-0.0050616	-0.0259756	-0.0309576	0.0366909	0.0878313	0.462662			0.0380871	-0.135214	-0.00417227	0.03796	0.0730616	0.420492		0.00718856	-0.0955354	-0.100081	0.0321423	0.0735865	0.53467
-0.363	-0.00148633	-0.026113	-0.024893	0.0358302	0.0882438	0.455604			0.0366239	-0.135749	-0.0101673	0.0401367	0.0715354	0.417943		0.00920575	-0.0975142	-0.0971504	0.0325821	0.0731071	0.529051
-0.362	0.000995868	-0.0268949	-0.0179959	0.0358676	0.0880543	0.459729			0.0317465	-0.135879	-0.0105993	0.0341327	0.0700744	0.415419		0.0121912	-0.0993155	-0.105229	0.0327874	0.0709358	0.533975
-0.361	0.00309093	-0.0268105	-0.0183552	0.0356889	0.0882212	0.454086			0.0364288	-0.135787	-0.00297773	0.0361431	0.0685602	0.401522		0.015338	-0.100982	-0.101766	0.0314155	0.0698356	0.525424
-0.36	0.0017929	-0.0277582	-0.0133952	0.0373531	0.0883425	0.456727			0.0342827	-0.135843	0.00208792	0.0383209	0.0673694	0.412004		0.0142084	-0.103326	-0.102315	0.0318711	0.0689729	0.517853
-0.359	-0.00030216	-0.0286448	-0.0120132	0.036551	0.087324	0.45529			0.0317465	-0.132467	-0.0124268	0.0359429	0.0717656	0.418805		0.0138049	-0.103678	-0.114564	0.0301477	0.0683076	0.500701
-0.358	-0.00212395	-0.0297246	-0.00440277	0.0366909	0.0866605	0.449201			0.0313563	-0.130725	-0.000376947	0.0359837	0.0735469	0.429153		0.0104967	-0.104243	-0.118029	0.0305182	0.0685555	0.504755
-0.357	-0.000529888	-0.0299586	0.00168817	0.0362834	0.0861658	0.447272			0.034868	-0.127831	0.000669197	0.0381486	0.0783846	0.426886		0.0069465	-0.10539	-0.118825	0.0315549	0.0683964	0.510257
-0.356	0.000107747	-0.0297104	0.00218756	0.0385978	0.0866283	0.451033			0.0291127	-0.125795	0.00620649	0.0381982	0.0823566	0.438767		0.00839887	-0.104288	-0.117615	0.0323	0.0705101	0.510851
-0.355	0.000494879	-0.0305749	-0.00559888	0.0408505	0.0865399	0.454582			0.029698	-0.122114	0.0131516	0.035649	0.0890168	0.432639		0.00960919	-0.104859	-0.123974	0.0307198	0.0699386	0.512402
-0.354	-0.00157742	-0.0310087	-0.00797378	0.0415079	0.0861104	0.453622			0.0341852	-0.121702	0.00364338	0.0386484	0.0914641	0.429553		0.00767268	-0.106242	-0.120603	0.0264715	0.0710593	0.510967
-0.353	-0.00246554	-0.0315162	-0.0182024	0.041803	0.0867061	0.453154			0.0355508	-0.120978	-0.00294099	0.0368298	0.0941774	0.429201		0.00589755	-0.107523	-0.109885	0.0296512	0.0715558	0.508108
-0.352	-0.00112197	-0.0320878	-0.0175306	0.0416851	0.0863151	0.458913			0.0314538	-0.119311	-0.0162858	0.0388208	0.0973906	0.426441		0.00638168	-0.108678	-0.115342	0.0270706	0.0701764	0.515659
-0.351	0.00202063	-0.0328035	-0.0229174	0.042601	0.0857144	0.457801			0.0328195	-0.120273	-0.00994722	0.0372694	0.0972695	0.435498		0.00734993	-0.110655	-0.115499	0.0314419	0.0696139	0.516347
-0.35	0.0062563	-0.0329999	-0.0214746	0.0429246	0.0856576	0.455755			0.0341852	-0.121022	-0.014	0.0380408	0.0964764	0.437275		0.0145311	-0.110404	-0.115919	0.0315045	0.0720817	0.521387
-0.349	0.00753156	-0.0345809	-0.0205381	0.0441984	0.0855247	0.451623			0.0325269	-0.120317	-0.00397336	0.0393428	0.0966792	0.440613		0.0163062	-0.111631	-0.107864	0.0322884	0.0710211	0.514304
-0.348	0.00639294	-0.0351871	-0.0226183	0.0432876	0.0855327	0.453251			0.0335999	-0.121183	-0.00896178	0.0385571	0.0954009	0.45201		0.0205827	-0.11273	-0.115158	0.0302518	0.0708931	0.521483
-0.347	0.00744047	-0.0368714	-0.0182259	0.0409956	0.0853273	0.457765			0.0349656	-0.120268	-0.0106147	0.0379004	0.0950329	0.468786		0.0192917	-0.113466	-0.116885	0.0319955	0.0701307	0.518173
-0.346	0.0100138	-0.0373558	-0.0146579	0.0396248	0.0859371	0.457049			0.0323318	-0.119836	-0.0119026	0.0382485	0.0958908	0.465782		0.0222771	-0.112816	-0.0919824	0.0360962	0.0707449	0.505324
-0.345	0.0125643	-0.0381538	-0.0231085	0.0390581	0.0854969	0.466651			0.0289176	-0.119908	-0.0127561	0.0360424	0.0952701	0.478081		0.0263922	-0.114148	-0.0911471	0.0350437	0.0692623	0.503522
-0.344	0.0147276	-0.0390853	-0.0211692	0.0399648	0.0859341	0.466349			0.0292103	-0.119828	-0.0166509	0.0390079	0.094081	0.472493		0.0265536	-0.11453	-0.100562	0.0328808	0.0692756	0.503104
-0.343	0.0123593	-0.0408688	-0.0187426	0.0393602	0.085983	0.459488			0.0311612	-0.119792	-0.00656672	0.0391377	0.0930639	0.468354		0.025666	-0.115223	-0.106726	0.0326458	0.0685088	0.492146
-0.342	0.00892067	-0.0429284	-0.018834	0.03925	0.0854637	0.46015			0.0262838	-0.120935	-0.0163962	0.0386002	0.0925656	0.452054		0.0214702	-0.115292	-0.102429	0.0314966	0.0688813	0.490598
-0.341	0.00810087	-0.0447778	-0.0144427	0.0390918	0.0852204	0.466826			0.0250157	-0.120093	-0.0183998	0.0363398	0.0919002	0.458701		0.0209861	-0.115418	-0.09894	0.0339903	0.0698253	0.48741
-0.34	0.0095583	-0.0464984	-0.0156218	0.0392299	0.0844459	0.465171			0.0264789	-0.119816	-0.0157761	0.0392065	0.0907114	0.454255		0.0206634	-0.116185	-0.108055	0.0372535	0.0702836	0.499072
-0.339	0.0105147	-0.0482276	-0.0224688	0.039262	0.0837055	0.466167			0.0267716	-0.11791	-0.014391	0.0364354	0.0929421	0.46381		0.0180814	-0.115723	-0.107529	0.0352128	0.0725806	0.49095
-0.338	0.00987712	-0.0502273	-0.0221347	0.0431352	0.0832005	0.467986			0.0230648	-0.115657	-0.014672	0.0385581	0.0944517	0.466176		0.0200179	-0.114314	-0.100902	0.0324558	0.0762695	0.486246
-0.337	0.00773651	-0.0522443	-0.0322391	0.0430838	0.082975	0.455947			0.025601	-0.112017	-0.0166233	0.0388752	0.0975574	0.46372		0.0176779	-0.114144	-0.106654	0.0317166	0.077238	0.479837
-0.336	0.00659789	-0.0540203	-0.0278708	0.0428921	0.0822702	0.461255			0.0270642	-0.113028	0.00532373	0.0399584	0.0984894	0.478391		0.015338	-0.113355	-0.106674	0.0320881	0.0799479	0.477274
-0.335	0.00876127	-0.0556032	-0.0241141	0.0411745	0.0817864	0.458768			0.0273568	-0.112604	-0.018584	0.0355855	0.0994773	0.479103		0.0168711	-0.114189	-0.099712	0.0361215	0.0814055	0.479768
-0.334	0.0127692	-0.0573688	-0.0251443	0.0423579	0.0816846	0.456605			0.0254059	-0.111459	-0.0127338	0.0361364	0.100261	0.495461		0.0218737	-0.115155	-0.0980681	0.0343077	0.0814912	0.484762
-0.333	0.0155475	-0.0595091	-0.0284371	0.0429478	0.08121	0.45779			0.0282348	-0.11246	-0.00607014	0.0372658	0.0991494	0.499463		0.0247784	-0.117351	-0.0908258	0.0328916	0.0804249	0.48512
-0.332	0.015798	-0.0610401	-0.0279944	0.042437	0.0810882	0.471051			0.0274544	-0.113804	-0.0192038	0.0386804	0.0985616	0.491481		0.0265536	-0.119131	-0.093425	0.030732	0.0790391	0.498392
-0.331	0.013794	-0.0623586	-0.0257703	0.0405999	0.0805874	0.472098			0.0260887	-0.112706	-0.0245199	0.0359703	0.0994397	0.484818		0.0281673	-0.121317	-0.0917371	0.0306708	0.0778293	0.490034
-0.33	0.0168227	-0.0644151	-0.0223787	0.0398297	0.0802443	0.465245			0.0253083	-0.114039	-0.0221154	0.0371801	0.097854	0.491472		0.0302652	-0.121869	-0.0929407	0.0336674	0.0776946	0.489049
-0.329	0.0189178	-0.0660677	-0.0206036	0.0380948	0.0800105	0.46264			0.0255034	-0.114675	-0.0282075	0.0393081	0.0967985	0.485181		0.0313141	-0.123916	-0.0992596	0.0359476	0.0768055	0.495496
-0.328	0.0208079	-0.0675844	-0.023947	0.035819	0.0797492	0.45898			0.0211138	-0.115047	-0.0237391	0.0382613	0.0958436	0.493018		0.0352678	-0.1244	-0.0947102	0.0345489	0.0764456	0.498143
-0.327	0.0206257	-0.0695907	-0.0187279	0.0371666	0.0793843	0.460028			0.0203334	-0.114941	-0.010195	0.0384854	0.0957581	0.500488		0.0353485	-0.125814	-0.0864509	0.0308999	0.0758832	0.507405
-0.326	0.0186673	-0.0709546	-0.0143666	0.0367224	0.0794862	0.456114			0.0224795	-0.113827	0.00263944	0.0404638	0.0955142	0.498789		0.0319596	-0.126355	-0.08544	0.032751	0.0747217	0.50331
-0.325	0.0156385	-0.0726821	-0.0224128	0.0345036	0.0788503	0.461217			0.021504	-0.11329	0.00379583	0.0407832	0.0963833	0.50345		0.0274411	-0.126471	-0.0803089	0.0333952	0.0755764	0.503419
-0.324	0.0150237	-0.074273	-0.0198329	0.0352309	0.0777867	0.461259			0.017407	-0.111379	0.0134045	0.038229	0.0969295	0.504101		0.0278446	-0.127801	-0.0852783	0.0354377	0.0755165	0.507386
-0.323	0.0170504	-0.0753867	-0.0231916	0.035109	0.0766049	0.461913			0.0156511	-0.109281	0.00613278	0.0388143	0.0971436	0.495086		0.0254239	-0.128159	-0.0842412	0.0365567	0.0757018	0.495085
-0.322	0.0166405	-0.0764574	-0.0189817	0.0341503	0.0757765	0.453936			0.0155536	-0.108595	0.00879636	0.0400231	0.0977081	0.474192		0.0251819	-0.128289	-0.080143	0.0359727	0.0762094	0.509128
-0.321	0.01409	-0.0775847	-0.0159158	0.0346071	0.0751901	0.459065			0.0176996	-0.108275	0.018712	0.0417448	0.0989268	0.457356		0.0234067	-0.129635	-0.0804319	0.0302664	0.0761151	0.501513
-0.32	0.0119266	-0.0781896	-0.0183464	0.0359859	0.0744047	0.462997			0.0159438	-0.10669	0.0117436	0.0406235	0.0978762	0.464142		0.0213089	-0.131297	-0.0932988	0.0329874	0.0768783	0.504591
-0.319	0.0117445	-0.0781055	-0.0195517	0.0358961	0.0735104	0.473217			0.0182849	-0.105933	0.0247239	0.0382843	0.0969099	0.461461		0.0193724	-0.132047	-0.0950326	0.0326367	0.0768934	0.51308
-0.318	0.013589	-0.0776108	-0.0202594	0.0347529	0.0732822	0.471343			0.0190653	-0.106382	0.0167947	0.0373642	0.096082	0.456641		0.0223578	-0.13347	-0.0925104	0.0350811	0.0759214	0.513018
-0.317	0.0181663	-0.0779401	-0.0249631	0.0341482	0.0722481	0.473548			0.0175045	-0.10314	0.0281616	0.0363206	0.0967768	0.460805		0.0263922	-0.133389	-0.0810822	0.0345682	0.0758845	0.520011
-0.316	0.0187128	-0.0769205	-0.0249657	0.0354004	0.0715872	0.47442			0.0192604	-0.101726	0.0273028	0.0371149	0.0976965	0.440296		0.0279252	-0.133982	-0.0811966	0.0318258	0.0760767	0.50944
-0.315	0.019396	-0.0752353	-0.0211073	0.0334451	0.072979	0.470969			0.0207236	-0.102244	0.0239195	0.0382742	0.0970466	0.460066		0.0292969	-0.134715	-0.0960898	0.0277478	0.0763451	0.52069
-0.314	0.0172782	-0.0741578	-0.00734508	0.0345228	0.0733192	0.471427			0.01848	-0.102252	0.0235563	0.036606	0.0973873	0.467312		0.0291356	-0.135076	-0.114361	0.0294545	0.0765728	0.520324
-0.313	0.0206485	-0.0718887	-0.00749192	0.0333526	0.0750271	0.472906			0.0155536	-0.0976894	0.0221639	0.0334907	0.0999616	0.462285		0.0317176	-0.136177	-0.108484	0.0310493	0.0757704	0.516936
-0.312	0.0229713	-0.0679786	-0.0090504	0.0336033	0.0782879	0.471494			0.0171143	-0.097405	0.0216256	0.0358101	0.0984122	0.469422		0.033412	-0.137312	-0.108828	0.0306745	0.0755335	0.505874
-0.311	0.0233356	-0.0658048	-0.00603312	0.0318156	0.0795386	0.471424			0.0153585	-0.0958399	0.0268286	0.0386779	0.0987778	0.454865		0.0355099	-0.13763	-0.114155	0.0305118	0.076613	0.511348
-0.31	0.0211267	-0.060955	-0.00065164	0.0316565	0.0838004	0.477347			0.0137977	-0.0943422	0.0259863	0.0368707	0.10008	0.452023		0.0347837	-0.139747	-0.121045	0.0285884	0.0753942	0.526625
-0.309	0.0185762	-0.056393	-0.00895439	0.0321899	0.0877853	0.472056			0.0138953	-0.0917264	0.0190259	0.0367941	0.09929	0.459079		0.0322017	-0.140373	-0.110688	0.0309153	0.0756756	0.511596
-0.308	0.015889	-0.0525697	-0.0143099	0.0330932	0.090645	0.471012			0.0132124	-0.0904981	0.0170745	0.0366742	0.0987383	0.465085		0.0261501	-0.141523	-0.109844	0.0314932	0.0755491	0.522398
-0.307	0.0147049	-0.0483943	-0.00997471	0.0338039	0.0947541	0.470148			0.00979827	-0.091177	0.0324991	0.0381956	0.0973971	0.470035		0.0247784	-0.141976	-0.120289	0.0311919	0.0756738	0.515891
-0.306	0.0169366	-0.0444294	-0.00801468	0.0327869	0.098523	0.473953			0.0105786	-0.0891187	0.0291496	0.0360443	0.0975301	0.472879		0.0270377	-0.143004	-0.125393	0.0310769	0.0755696	0.515863
-0.305	0.014887	-0.0405496	-0.00975055	0.0308709	0.101209	0.464084			0.0135051	-0.0898782	0.0357852	0.0386864	0.0959839	0.469661		0.0231647	-0.144082	-0.135442	0.030572	0.0746841	0.510872
-0.304	0.0120633	-0.0376987	-0.00748878	0.0319333	0.103477	0.469755			0.0150658	-0.0881837	0.0376866	0.0400055	0.0946993	0.469067		0.0208247	-0.144201	-0.12861	0.0299463	0.0746399	0.505916
-0.303	0.0101048	-0.0345574	-0.00921962	0.0317807	0.105357	0.468501			0.0120419	-0.0884567	0.0286119	0.0375989	0.0938693	0.464141		0.0187269	-0.1444	-0.134486	0.029332	0.0742005	0.512807
-0.302	0.0103098	-0.0322791	-0.0141984	0.0330379	0.106849	0.475128			0.0131149	-0.0863053	0.0160319	0.0377397	0.093997	0.469346		0.0168711	-0.143731	-0.125814	0.0293529	0.0732719	0.492803
-0.301	0.0125415	-0.0310158	-0.0209021	0.0326019	0.106583	0.471682			0.0160413	-0.085781	0.00323903	0.0359101	0.0915526	0.462791		0.0207441	-0.144005	-0.122971	0.0282285	0.0734726	0.503534
-0.3	0.014887	-0.0304933	-0.0153302	0.0332873	0.106674	0.463507			0.0151634	-0.0829836	0.0132484	0.0374736	0.0919347	0.469657		0.0228419	-0.144227	-0.129833	0.0295604	0.0728831	0.4892
-0.299	0.0158435	-0.0292766	-0.0130738	0.0329273	0.106551	0.467712			0.015456	-0.0814482	0.0016961	0.0374953	0.0906127	0.478903		0.026957	-0.143919	-0.127062	0.0312716	0.0720337	0.490286
-0.298	0.0136346	-0.0284108	-0.0113626	0.0325623	0.106164	0.46151			0.0183825	-0.080276	-0.00104913	0.0395475	0.0904239	0.484211		0.0294583	-0.141923	-0.115184	0.0294021	0.0719437	0.492418
-0.297	0.0138851	-0.0272334	-0.0138325	0.0371763	0.106311	0.460612			0.0172119	-0.0797107	-0.00996264	0.0358306	0.0914083	0.488375		0.0292162	-0.140449	-0.105042	0.0281057	0.0714531	0.489437
-0.296	0.015297	-0.0269408	-0.0131116	0.0367428	0.106111	0.462394			0.0135051	-0.0796415	-0.0197007	0.0364645	0.090839	0.492465		0.0293776	-0.135704	-0.0973869	0.0256536	0.0740783	0.497913
-0.295	0.0175742	-0.0256397	-0.0127904	0.0377476	0.105668	0.463625			0.0130173	-0.0787779	-0.00800344	0.0391246	0.0912941	0.500697		0.0305072	-0.13391	-0.0985813	0.0266039	0.075125	0.506817
-0.294	0.0178247	-0.0242767	-0.020632	0.0388034	0.104683	0.458355			0.0168217	-0.0772811	-0.0201039	0.0388362	0.0908154	0.506442		0.0325244	-0.13043	-0.100901	0.025632	0.0774499	0.519367
-0.293	0.0134979	-0.0237303	-0.0189074	0.0389832	0.104101	0.460505			0.0126272	-0.0766253	-0.019108	0.0375858	0.0917371	0.501259		0.0299424	-0.127067	-0.0989777	0.026363	0.0789956	0.523815
-0.292	0.00964939	-0.0228005	-0.0224614	0.0378825	0.103451	0.465656			0.0119443	-0.0749977	-0.0367069	0.0393496	0.0939046	0.495257		0.0286514	-0.123848	-0.0961011	0.0276589	0.081354	0.530721
-0.291	0.00798701	-0.0215201	-0.0194787	0.040386	0.102583	0.465979			0.0128222	-0.0760902	-0.0469987	0.0370766	0.0944878	0.485926		0.0237295	-0.121002	-0.0836511	0.0275634	0.0839732	0.526209
-0.29	0.0076682	-0.02086	-0.0199747	0.04089	0.101707	0.468164			0.0114566	-0.076911	-0.0595993	0.0377574	0.0955281	0.494626		0.0206634	-0.116048	-0.0880699	0.0265401	0.0882484	0.519155
-0.289	0.00737216	-0.0193772	-0.0168734	0.0397719	0.101415	0.473407			0.0109688	-0.0782741	-0.0664318	0.0383488	0.094776	0.487421		0.0207441	-0.112272	-0.0939405	0.0276553	0.0916708	0.521831
-0.288	0.00507213	-0.0180914	-0.0207458	0.0376314	0.10042	0.469504			0.0147732	-0.080411	-0.0458105	0.0403529	0.0939695	0.475636		0.0177586	-0.107006	-0.10497	0.0297185	0.0960673	0.505799
-0.287	0.00218003	-0.0178218	-0.0190312	0.0374918	0.10009	0.466357			0.017407	-0.0819852	-0.0584751	0.0376318	0.0922241	0.480149		0.015338	-0.10369	-0.104767	0.0281717	0.0972634	0.501361
-0.286	-0.00109919	-0.015911	-0.0174298	0.0378108	0.100298	0.459105			0.015456	-0.0830951	-0.0614082	0.0408809	0.091228	0.483546		0.0118684	-0.100698	-0.0778368	0.028092	0.0989023	0.500379
-0.285	0.000426557	-0.014826	-0.0124469	0.0383107	0.100526	0.459551			0.0151634	-0.0852816	-0.0530815	0.0415832	0.0907042	0.48805		0.0135629	-0.0987269	-0.0733905	0.0272647	0.0989389	0.489324
-0.284	0.00372856	-0.0138512	-0.0111686	0.0393081	0.100113	0.462786			0.0161389	-0.0874112	-0.0236426	0.0410768	0.0894172	0.480212		0.0155801	-0.0949371	-0.0775501	0.0294538	0.100026	0.489291
-0.283	0.00443451	-0.0122036	-0.0106934	0.0400056	0.100944	0.463825			0.020431	-0.0891184	-0.0176556	0.0396229	0.0885548	0.490514		0.0181621	-0.0924777	-0.0730259	0.0295394	0.0990087	0.473374
-0.282	0.00370579	-0.0115119	-0.00874165	0.0386792	0.100794	0.46312			0.019553	-0.0914421	-0.022671	0.0444815	0.0875811	0.478036		0.0201793	-0.0912235	-0.0667258	0.0341297	0.0987329	0.469308
-0.281	0.00236221	-0.0113142	-0.0105259	0.0389429	0.100238	0.461334			0.0209187	-0.0929653	-0.0162284	0.040351	0.0856078	0.498311		0.0200179	-0.0898868	-0.067446	0.0338095	0.0988583	0.492187
-0.28	0.00238499	-0.0110406	-0.00216979	0.0433095	0.100158	0.460751			0.0200408	-0.0942386	-0.00287612	0.0408033	0.0847353	0.496228		0.0220351	-0.0896994	-0.0673024	0.0268282	0.0975567	0.501848
-0.279	0.00368303	-0.0110323	0.000227652	0.0454955	0.0998696	0.463613			0.0172119	-0.0952334	0.000194711	0.0414891	0.0838381	0.49308		0.0220351	-0.0898934	-0.0819203	0.0290269	0.0956961	0.500758
-0.278	0.00427511	-0.0103539	0.00484188	0.0441998	0.1005	0.455443			0.0175045	-0.0949469	-0.00851266	0.0444897	0.0833664	0.498149		0.0247784	-0.0903473	-0.0838769	0.0274399	0.0936431	0.506655
-0.277	0.00443451	-0.010167	0.00823818	0.0437504	0.0991568	0.464217			0.0205285	-0.0959637	-0.00399359	0.0411867	0.0821485	0.517376		0.0236488	-0.0883367	-0.0913263	0.0295249	0.0930776	0.525273
-0.276	-0.000347693	-0.0100047	0.0069382	0.0443639	0.0975096	0.465153			0.020431	-0.0971798	-0.00782493	0.0421247	0.0822237	0.521809		0.0207441	-0.0861915	-0.0874251	0.0301138	0.0920893	0.519232
-0.275	-0.00355861	-0.0108489	0.010498	0.0434579	0.0970533	0.462488			0.0168217	-0.0982803	-0.0210352	0.0402278	0.0818673	0.521518		0.0180007	-0.0844903	-0.0798263	0.0288261	0.0914916	0.517366
-0.274	-0.00517545	-0.0105274	0.0135483	0.0428403	0.09528	0.461916			0.0155536	-0.0986144	-0.0125949	0.0402006	0.0796555	0.521676		0.0143697	-0.081598	-0.0746632	0.0283446	0.0912395	0.524203
-0.273	-0.00367247	-0.00965764	0.0108091	0.0433493	0.0935814	0.465259			0.0162364	-0.0993094	-0.00800038	0.0419542	0.0778136	0.519445		0.0121105	-0.0799014	-0.0755699	0.0290044	0.0900232	0.516597
-0.272	-0.00583585	-0.00964804	0.0057597	0.0415034	0.092532	0.458323			0.0173094	-0.0994034	-0.0140709	0.0402076	0.0779018	0.503371		0.0121912	-0.0783974	-0.0673448	0.031082	0.0903882	0.513315
-0.271	-0.008523	-0.00839679	0.00193943	0.0384071	0.0922027	0.461253			0.0186751	-0.0990462	-0.00347738	0.0420195	0.0786486	0.517534		0.0104161	-0.0792547	-0.077463	0.0330036	0.0897119	0.511451
-0.27	-0.0103903	-0.0063354	0.00146465	0.0366113	0.0914389	0.462024			0.0234549	-0.0995429	0.00216064	0.0419784	0.0800354	0.5064		0.0062203	-0.0784772	-0.0723495	0.0311157	0.0893677	0.505607
-0.269	-0.0124626	-0.00596935	0.0022943	0.0368702	0.0905907	0.447949			0.0221868	-0.10015	0.0206993	0.0406867	0.0798906	0.486049		0.00323487	-0.0781417	-0.0730407	0.0299194	0.088124	0.491435
-0.268	-0.0099349	-0.0050689	0.00056831	0.0371792	0.0904151	0.451115			0.0219917	-0.0996016	0.00920216	0.045211	0.0803429	0.482243		0.00686581	-0.077572	-0.0674529	0.0310138	0.086648	0.478357
-0.267	-0.00590418	-0.00366287	0.00536219	0.0364288	0.0903582	0.454375			0.0252108	-0.0997074	0.0121721	0.0418188	0.0819153	0.493713		0.00856025	-0.0753628	-0.0623417	0.032791	0.0874674	0.480417
-0.266	-0.00560813	-0.00280989	0.00917718	0.0358432	0.0897905	0.454436			0.028625	-0.101785	0.00833684	0.0394695	0.0809564	0.493418		0.00952851	-0.0735983	-0.0512883	0.0341552	0.0886904	0.487792
-0.265	-0.00649626	-0.00288303	0.0162429	0.0358234	0.0903015	0.45548			0.0287225	-0.102909	0.006469	0.0396556	0.0805257	0.479045		0.0105774	-0.0733675	-0.0563534	0.0382814	0.089722	0.475941
-0.264	-0.00824974	-0.00190758	0.0247548	0.035734	0.0905842	0.464019			0.0278446	-0.104645	0.0228375	0.040449	0.080558	0.493584		0.0123526	-0.0726414	-0.0600731	0.0357593	0.0906317	0.46316
-0.263	-0.00556259	-0.00131195	0.0153895	0.0361925	0.0912633	0.456599			0.0274544	-0.105701	0.029133	0.0404791	0.0787489	0.471766		0.0122719	-0.0698664	-0.0507172	0.0319442	0.0910269	0.462969
-0.262	-0.00369525	-0.00158596	0.0161324	0.0384862	0.0921123	0.468446			0.0265765	-0.103951	0.0239549	0.0408667	0.0804851	0.487385		0.0134822	-0.0709054	-0.0516364	0.0304176	0.0904331	0.455835
-0.261	-0.0021695	-0.00192846	0.0170959	0.0369821	0.0918864	0.467523			0.0250157	-0.10556	0.00431977	0.0399536	0.0794516	0.481553		0.0167097	-0.0709875	-0.0589774	0.0308538	0.0895112	0.457599
-0.26	-0.00321703	-0.00181275	0.0144506	0.0349646	0.0917364	0.470009			0.0282348	-0.106353	0.00424927	0.0392781	0.0795852	0.459193		0.0143697	-0.0711915	-0.0545822	0.0316044	0.0883336	0.452471
-0.259	-0.00626853	-0.00270365	0.0114071	0.0354308	0.0914201	0.467734			0.0287225	-0.107291	0.00358896	0.0380736	0.0796664	0.459036		0.0113036	-0.0720522	-0.0520535	0.0337568	0.0867133	0.449792
-0.258	-0.00950222	-0.00304284	0.00688466	0.0350609	0.0901261	0.464162			0.0262838	-0.108529	0.00886842	0.0378039	0.0792128	0.460983		0.0082375	-0.0727861	-0.0583918	0.0326457	0.0847975	0.463807
-0.257	-0.00897846	-0.00319238	0.00434321	0.0346927	0.0897309	0.467439			0.0232598	-0.110193	0.00571409	0.0384309	0.0785936	0.457857		0.00638169	-0.0722388	-0.0700258	0.0299723	0.0837181	0.466388
-0.256	-0.00642795	-0.00330919	-0.00344703	0.0323591	0.0897805	0.462288			0.0264789	-0.110406	0.0133792	0.0399424	0.0782368	0.473171		0.00686581	-0.0720467	-0.071377	0.0316613	0.0828325	0.460386
-0.255	-0.00802201	-0.00268748	-0.00080966	0.0328964	0.0895159	0.468448			0.0292102	-0.111685	0.00613241	0.0368933	0.0777345	0.451786		0.00226662	-0.0708335	-0.0679475	0.0323037	0.0834046	0.448503
-0.254	-0.0102082	-0.00226166	0.00411049	0.0317604	0.0903691	0.469119			0.0313563	-0.112683	0.00264292	0.0397604	0.0773327	0.45328		0.00202456	-0.0707795	-0.0701592	0.0313424	0.0830204	0.437753
-0.253	-0.0108913	-0.00292625	0.000839307	0.0314712	0.0899484	0.468984			0.0312587	-0.113849	-0.000286414	0.0398422	0.0780714	0.463856		8.80581e-05	-0.0709179	-0.0665819	0.030102	0.0833389	0.442249
-0.252	-0.0114607	-0.00321933	0.00666979	0.0296796	0.0890527	0.470032			0.0322342	-0.114529	-0.00765876	0.0379798	0.07952	0.451889		-0.000880191	-0.0702102	-0.0596899	0.0292774	0.0837258	0.446077
-0.251	-0.00806756	-0.00357812	0.00560764	0.0319756	0.0879314	0.470011			0.0321367	-0.115987	-0.00940184	0.0402494	0.0796428	0.449158		0.0017825	-0.0707939	-0.064834	0.0291277	0.0819776	0.439564
-0.25	-0.00349031	-0.00410371	0.00342104	0.0319782	0.0876818	0.464544			0.0343803	-0.115907	-0.0162179	0.041957	0.0821981	0.456115		0.00613963	-0.0705711	-0.0661071	0.032082	0.0805714	0.438142
-0.249	-0.00205564	-0.00357214	0.00653619	0.0330062	0.0867881	0.472328			0.0367214	-0.116471	-0.0133506	0.0375051	0.0827271	0.463267		0.007592	-0.0712102	-0.0675069	0.0342673	0.0797199	0.431031
-0.248	-0.00394575	-0.00356646	0.0152894	0.0326732	0.0860218	0.469231			0.0410135	-0.11697	-0.00982966	0.0381177	0.0838985	0.467171		0.00968988	-0.0718115	-0.0792721	0.0338344	0.0795348	0.425894
-0.247	-0.00321703	-0.00289102	0.014373	0.0319982	0.0870119	0.466934			0.0358435	-0.117412	-0.0176003	0.0372474	0.0847505	0.476397		0.0109002	-0.071964	-0.0744212	0.0331775	0.0799261	0.425768
-0.246	-0.000165531	-0.00233497	0.0180933	0.0314548	0.0867259	0.469575			0.0352582	-0.116887	-0.0269973	0.0410036	0.0873054	0.480412		0.011465	-0.0732999	-0.0802984	0.0323685	0.0793566	0.432327
-0.245	0.00277211	-0.00150397	0.0125455	0.0323091	0.0860861	0.465341			0.033795	-0.118553	-0.0196643	0.0363132	0.0886609	0.473045		0.0138049	-0.0718764	-0.0810944	0.031431	0.0779452	0.429055
-0.244	0.00359192	-0.00096579	0.00325715	0.0330985	0.0869363	0.472743			0.0339901	-0.119045	-0.0245316	0.0374909	0.0887445	0.472903		0.0146925	-0.0719075	-0.0751622	0.0311474	0.078444	0.436978
-0.243	0.00256716	-0.000702606	0.00740857	0.0330984	0.0868282	0.47372			0.0345754	-0.118711	-0.0145218	0.0363531	0.089703	0.471268		0.0150959	-0.0714633	-0.088176	0.0304436	0.0795965	0.442513
-0.242	-0.000233846	0.000784292	0.000775386	0.0331274	0.086688	0.475932			0.0375018	-0.119064	-9.24952e-06	0.0354771	0.0888846	0.472908		0.0109809	-0.0718359	-0.0792243	0.0294807	0.0798903	0.449662
-0.241	-0.00160019	0.000467324	0.000361039	0.0324255	0.0863938	0.470356			0.0357459	-0.120899	0.0151353	0.0359335	0.0876973	0.465706		0.00936712	-0.0717724	-0.072725	0.0315273	0.0792963	0.450884
-0.24	-2.88944e-05	0.000248383	-0.000668711	0.0339161	0.0862638	0.464174			0.0311612	-0.120826	0.0112632	0.0394835	0.0860216	0.466053		0.00807612	-0.0725585	-0.0782364	0.0303747	0.0785353	0.45271
-0.239	0.001383	0.000471534	0.00893247	0.0356539	0.0858299	0.459754			0.031844	-0.120193	0.0137153	0.0376128	0.0862387	0.470764		0.008883	-0.073782	-0.0690824	0.030121	0.0771248	0.437209
-0.238	0.000289924	0.000384478	0.0145303	0.0366358	0.0852631	0.465287			0.0358435	-0.119199	0.0347193	0.0372474	0.0869112	0.475957		0.00622031	-0.0747215	-0.0734787	0.0286685	0.0760203	0.439816
-0.237	-0.00107642	0.000735129	0.0121811	0.0384101	0.0860426	0.467557			0.0381846	-0.11941	0.0382092	0.039676	0.0862188	0.483062		0.00404174	-0.0758755	-0.0722014	0.0274247	0.0754553	0.438993
-0.236	-0.00253385	0.00135101	0.0224271	0.0381904	0.0857375	0.468436			0.0351607	-0.118509	0.0300141	0.0398611	0.084888	0.470814		0.00605893	-0.0767057	-0.0716118	0.0266685	0.0746343	0.447023
-0.235	-0.000142753	0.0020584	0.0275125	0.0380114	0.0861225	0.47414			0.0329171	-0.117585	0.0333162	0.0381741	0.0841499	0.459239		0.00533274	-0.0767488	-0.0823895	0.0266685	0.0754939	0.452003
-0.234	0.00304539	0.0013854	0.0316556	0.0385668	0.0874023	0.479196			0.0386724	-0.116843	0.0324917	0.0392068	0.0858455	0.451239		0.00888299	-0.077733	-0.0972679	0.0284059	0.0754606	0.454667
-0.233	0.00659789	0.00159971	0.0389247	0.041016	0.088349	0.479083			0.0356484	-0.113091	0.0447466	0.039152	0.0874656	0.437717		0.0136436	-0.0781131	-0.095064	0.0299287	0.0761423	0.459114
-0.232	0.00621076	0.0011578	0.040329	0.0417048	0.0885472	0.4831			0.0387699	-0.110009	0.0461675	0.0389058	0.0894123	0.434388		0.015338	-0.0763234	-0.0951473	0.032485	0.0779237	0.466024
-0.231	0.00600581	0.000742103	0.0411126	0.040286	0.0881827	0.48353			0.0403307	-0.106584	0.0414423	0.0388616	0.0915953	0.430975		0.0181621	-0.0763922	-0.0864754	0.0321366	0.0790999	0.462438
-0.23	0.00867018	-2.55549e-05	0.0364854	0.0391374	0.087571	0.488499			0.0411111	-0.102146	0.0640463	0.0389819	0.0934871	0.424477		0.0200986	-0.0771659	-0.0814536	0.0332793	0.0796661	0.463652
-0.229	0.00989989	0.000375012	0.0413157	0.0380435	0.0882837	0.488303			0.0336974	-0.0973783	0.0555056	0.0377533	0.0965003	0.430146		0.0207441	-0.0771335	-0.074438	0.0322541	0.0800718	0.465936
-0.228	0.0142722	8.99795e-05	0.0423801	0.0384921	0.0870428	0.478811			0.0360386	-0.0950572	0.050812	0.0396465	0.097447	0.417091		0.0224385	-0.0778935	-0.0658605	0.0319479	0.0789529	0.464014
-0.227	0.0134979	-0.000698543	0.037944	0.0376699	0.0865826	0.479957			0.0374042	-0.0920349	0.0492287	0.0408206	0.0990224	0.422966		0.0250205	-0.0792388	-0.0659808	0.0310693	0.0776407	0.469718
-0.226	0.0111068	-0.000975103	0.0463645	0.0390972	0.0864378	0.480409			0.0331122	-0.0879488	0.0462376	0.0385691	0.100044	0.417558		0.0236488	-0.0800138	-0.0726957	0.0293071	0.077861	0.470106
-0.225	0.00935335	-0.00203267	0.048883	0.0390283	0.0855159	0.479027			0.0342827	-0.0871324	0.052341	0.0373631	0.0987379	0.421282		0.0210668	-0.0809372	-0.0737286	0.0318585	0.0781472	0.470473
-0.224	0.00953553	-0.0028314	0.0543638	0.0385373	0.0850181	0.482898			0.0313563	-0.0856378	0.0480805	0.0378935	0.0989741	0.409878		0.0188883	-0.0820897	-0.0868213	0.0365129	0.0772488	0.466321
-0.223	0.00989989	-0.00388895	0.0529907	0.0378348	0.0846041	0.477878			0.0296004	-0.0845349	0.0530781	0.0398783	0.0998398	0.41381		0.0181621	-0.0822959	-0.0893888	0.0364055	0.0772619	0.470397
-0.222	0.0114712	-0.00396096	0.051514	0.0419161	0.084697	0.480761			0.0264789	-0.0829141	0.0578658	0.0372251	0.0992346	0.401811		0.020502	-0.0812835	-0.0925964	0.0332997	0.0794683	0.464791
-0.221	0.00999099	-0.00415259	0.0589271	0.0427708	0.0842976	0.488657			0.029698	-0.0812292	0.0483682	0.0379528	0.0979162	0.407258		0.019211	-0.0809858	-0.091672	0.0301072	0.0787848	0.460943
-0.22	0.00800978	-0.00491167	0.0572676	0.043603	0.0841742	0.493418			0.0328195	-0.0780481	0.0480458	0.0386672	0.0977624	0.420945		0.0167097	-0.080488	-0.0985971	0.0313005	0.0798762	0.460038
-0.219	0.00841968	-0.00552685	0.0541117	0.0422851	0.0845576	0.491444			0.0317465	-0.076564	0.0351014	0.0378889	0.0966646	0.433676		0.0161449	-0.0816977	-0.101466	0.033305	0.0791324	0.454613
-0.218	0.011494	-0.00586923	0.0555916	0.0429961	0.0843219	0.496237			0.0294053	-0.0739915	0.0344024	0.0378894	0.0947085	0.436913		0.0163869	-0.0812847	-0.111201	0.031675	0.0781961	0.45301
-0.217	0.0150009	-0.00746078	0.0522153	0.0427905	0.0839128	0.496448			0.0321367	-0.0730524	0.0244824	0.0374507	0.0946077	0.426714		0.0208248	-0.0814858	-0.127432	0.033894	0.0782181	0.455337
-0.216	0.0166405	-0.00869193	0.0509264	0.0441188	0.0833822	0.49368			0.0303808	-0.0721937	0.0282963	0.0395421	0.0935811	0.413878		0.0238102	-0.0826457	-0.111295	0.0328181	0.0780065	0.460281
-0.215	0.0167089	-0.0094071	0.0494007	0.0437025	0.0834838	0.495522			0.0328195	-0.0692507	0.0244084	0.0390999	0.092119	0.416674		0.0279252	-0.0833776	-0.10285	0.0286099	0.0781668	0.468925
-0.214	0.0169821	-0.0110594	0.0520883	0.0425956	0.0834104	0.488067			0.0302833	-0.0676305	0.0293554	0.0372303	0.09126	0.435477		0.0287321	-0.0803538	-0.111448	0.0328862	0.0804708	0.470815
-0.213	0.0186217	-0.0126469	0.0554837	0.0404579	0.0830793	0.484792			0.0319416	-0.0625723	0.0225255	0.0363863	0.0922164	0.443363		0.0284901	-0.0792488	-0.099764	0.0374251	0.0815457	0.462598
-0.212	0.0207623	-0.0142501	0.0549758	0.0380622	0.0824513	0.481048			0.0249181	-0.0586756	0.0342151	0.0365539	0.0939891	0.451652		0.0333313	-0.0770239	-0.107077	0.0352936	0.0831663	0.45441
-0.211	0.0222426	-0.0155233	0.049102	0.0392277	0.0816978	0.479482			0.0260887	-0.0540973	0.0171845	0.0362927	0.0977972	0.438135		0.0338155	-0.0777388	-0.104059	0.0310393	0.0844026	0.446556
-0.21	0.0231535	-0.0171935	0.0487136	0.0388317	0.0808413	0.474526			0.0275519	-0.0529759	0.0327553	0.0386059	0.098262	0.427786		0.0355906	-0.079098	-0.110749	0.0317185	0.0854452	0.454336
-0.209	0.0183485	-0.0191412	0.0468189	0.0390024	0.0803309	0.480834			0.0230647	-0.0498759	0.0333653	0.039075	0.0989165	0.440269		0.0312334	-0.0803056	-0.114241	0.0312265	0.0852037	0.466491
-0.208	0.0175059	-0.020902	0.0466313	0.0383356	0.0798274	0.484295			0.0199432	-0.0453942	0.0208247	0.0381693	0.0997539	0.44737		0.0296197	-0.0817468	-0.115185	0.0330685	0.0850315	0.457318
-0.207	0.0177336	-0.0217556	0.0384881	0.0379505	0.079697	0.48617			0.01848	-0.0442569	0.0345536	0.0366236	0.0988919	0.449371		0.0263115	-0.0830473	-0.125381	0.0385034	0.0841103	0.449395
-0.206	0.0184168	-0.0239475	0.0343877	0.0378237	0.0790206	0.489084			0.0183825	-0.043563	0.0360273	0.0359469	0.0989438	0.456378		0.0259888	-0.0836049	-0.12861	0.0363045	0.0841293	0.433828
-0.205	0.0183029	-0.0256695	0.0359575	0.0397236	0.0781005	0.486776			0.0160413	-0.0409177	0.0393286	0.0376005	0.0983363	0.468285		0.0263922	-0.0846718	-0.118056	0.0329064	0.0838371	0.428916
-0.204	0.016094	-0.0271014	0.0425354	0.04157	0.0778292	0.494499			0.0186751	-0.038721	0.0470684	0.0395111	0.0965088	0.467377		0.0251012	-0.0858662	-0.106168	0.0322651	0.083388	0.44471
-0.203	0.0151148	-0.0290874	0.0382008	0.0413718	0.0772267	0.496264			0.0211138	-0.0370661	0.0497403	0.0367426	0.0966141	0.478736		0.0225192	-0.0864188	-0.108272	0.0343219	0.0831671	0.447552
-0.202	0.0164128	-0.0309686	0.0371262	0.0399461	0.0767144	0.506875			0.0160413	-0.0345795	0.0602058	0.036765	0.0967508	0.485812		0.0209054	-0.0875391	-0.110878	0.03607	0.0816933	0.461796
-0.201	0.0183712	-0.0326791	0.0386678	0.0397907	0.0764541	0.504837			0.0158462	-0.0314734	0.0679323	0.0352802	0.0968941	0.486359		0.0242943	-0.0878829	-0.0985702	0.0332141	0.0814619	0.469708
-0.2	0.0219921	-0.034179	0.0399718	0.0405858	0.0755309	0.512382			0.0182849	-0.0265374	0.0824051	0.0371866	0.0958686	0.481816		0.0278446	-0.088997	-0.0916474	0.0320682	0.0804806	0.474143
-0.199	0.0238366	-0.0358376	0.0404208	0.0398002	0.0747409	0.507985			0.0177972	-0.0221337	0.0898559	0.038537	0.0947625	0.499612		0.0300231	-0.0887892	-0.102889	0.0286752	0.0804954	0.473511
-0.198	0.0220148	-0.036971	0.0455642	0.0396867	0.0742237	0.506223			0.0183825	-0.0162613	0.0779673	0.0363586	0.0933377	0.495069		0.0323631	-0.089313	-0.0945279	0.0303161	0.0807238	0.479967
-0.197	0.0230624	-0.0384221	0.0504944	0.0376129	0.0736218	0.503677			0.0159438	-0.0116854	0.0901248	0.0331294	0.0912228	0.504723		0.0329279	-0.0895208	-0.0934981	0.0321347	0.0812728	0.479738
-0.196	0.0253396	-0.0400317	0.0460897	0.0363478	0.073001	0.502626			0.0149683	-0.00827955	0.112764	0.0374579	0.0918821	0.505726		0.0340575	-0.0900025	-0.0952498	0.0335953	0.0812095	0.478879
-0.195	0.0267515	-0.0413615	0.0467845	0.0334954	0.0722477	0.501697			0.011359	-0.00402023	0.118016	0.0339673	0.0927671	0.487899		0.0355906	-0.0908513	-0.0894879	0.0318529	0.0807934	0.492066
-0.194	0.0268654	-0.0425686	0.0454481	0.0325699	0.071344	0.503868			0.00940807	0.000757685	0.124828	0.0368122	0.090337	0.492081		0.0366395	-0.0909389	-0.0955444	0.0293044	0.0803141	0.481696
-0.193	0.0260911	-0.0435413	0.0403189	0.0345368	0.0705719	0.508975			0.00921298	0.00199376	0.120947	0.0378922	0.0898452	0.477249		0.0356713	-0.0902859	-0.0874783	0.0309225	0.0801787	0.469743
-0.192	0.0230624	-0.0444934	0.0418438	0.0331331	0.0697794	0.507765			0.00696939	0.00354235	0.119526	0.0381133	0.0895111	0.475544		0.0331699	-0.0896666	-0.0963692	0.0298988	0.0803445	0.460551
-0.191	0.020193	-0.0454774	0.0458721	0.0319683	0.0690021	0.507066			0.00355522	0.0115286	0.116178	0.0346921	0.0895514	0.469596		0.0296197	-0.0905353	-0.108834	0.0322841	0.0804537	0.46611
-0.19	0.0227208	-0.0460134	0.0456445	0.0330796	0.0685626	0.505786			0.00277484	0.0167519	0.117598	0.0341997	0.0900289	0.479399		0.0276025	-0.0908074	-0.103922	0.0356097	0.0812422	0.462996
-0.189	0.0224475	-0.0456728	0.046	0.0317825	0.0680003	0.503284			0.00453069	0.0213868	0.128525	0.035365	0.088558	0.485556		0.0260694	-0.0914843	-0.0995586	0.0334058	0.0810728	0.467406
-0.188	0.0207851	-0.0450172	0.0500687	0.0332923	0.0666536	0.498234			0.00404296	0.0278815	0.128019	0.0378657	0.0896107	0.523857		0.0260694	-0.0925313	-0.103576	0.0308117	0.0802638	0.471992
-0.187	0.0193049	-0.0447796	0.0510472	0.0332426	0.0657849	0.501664			0.00218956	0.0348272	0.117945	0.0367663	0.0868069	0.530607		0.0246977	-0.0924189	-0.099584	0.0306919	0.08232	0.474278
-0.186	0.0180752	-0.043685	0.0552313	0.0330595	0.0653997	0.490838			0.002092	0.0384986	0.132486	0.0334976	0.0850222	0.544887		0.0208248	-0.0926234	-0.0911827	0.0314084	0.0819645	0.471412
-0.185	0.0185079	-0.040833	0.0563124	0.0325187	0.0672645	0.485749			0.000823883	0.0432111	0.13774	0.0317522	0.0826511	0.573259		0.0216316	-0.0926957	-0.0971163	0.0319498	0.0829493	0.469818
-0.184	0.0209673	-0.0381689	0.0530994	0.0312969	0.0674203	0.484544			-0.00141971	0.0494103	0.146546	0.0323672	0.0831076	0.577409		0.0246977	-0.0935358	-0.0995967	0.0310034	0.0833983	0.457067
-0.183	0.024201	-0.0347355	0.0531728	0.032858	0.0701592	0.482824			-0.000444237	0.0517701	0.154947	0.0355687	0.082958	0.56443		0.0303459	-0.0938837	-0.0979746	0.0321774	0.0826098	0.452827
-0.182	0.0235178	-0.0307888	0.0481143	0.0317752	0.0745844	0.478082			0.000433697	0.0570641	0.194994	0.0369756	0.0822714	0.571209		0.0296197	-0.0942655	-0.106206	0.0268881	0.0818281	0.442254
-0.181	0.0226069	-0.0263938	0.0468648	0.0325724	0.0778098	0.478209			0.00101898	0.0605434	0.204861	0.0351798	0.0816545	0.597671		0.0311528	-0.0951505	-0.100735	0.0286403	0.0810178	0.441567
-0.18	0.023495	-0.0221509	0.0442289	0.0322735	0.0822251	0.472229			-0.00473633	0.0691149	0.256841	0.0306232	0.0782457	0.812415		0.0329279	-0.0960874	-0.103883	0.0294106	0.0799707	0.441289
-0.179	0.0256356	-0.0183403	0.0372877	0.0333082	0.0863661	0.471738			-0.00463878	0.0725596	0.37736	0.0309277	0.0784661	1.29016		0.0315562	-0.0950341	-0.11253	0.0272809	0.0802465	0.452016
-0.178	0.0265465	-0.0134813	0.0392582	0.0313528	0.0894167	0.473445			-0.00610199	0.0796468	0.477405	0.034344	0.0774653	1.65123		0.0353485	-0.0956826	-0.114635	0.028208	0.0785497	0.437102
-0.177	0.0259089	-0.0100511	0.036303	0.0322641	0.0917636	0.480166			-0.0107843	0.0831418	0.67798	0.0338216	0.0785122	1.82117		0.0344609	-0.0953446	-0.127016	0.0268778	0.0773074	0.432349
-0.176	0.0226525	-0.0079472	0.0386018	0.0329444	0.0934594	0.482064			-0.0118573	0.0872101	0.738604	0.0348504	0.0792458	1.95368		0.034703	-0.0949381	-0.125094	0.030636	0.0769712	0.428602
-0.175	0.0204435	-0.00419142	0.0299091	0.0334664	0.0966944	0.480213			-0.0126377	0.0911763	0.819173	0.0322847	0.076223	1.9976		0.0273604	-0.0950573	-0.118616	0.0297854	0.0761436	0.426453
-0.174	0.0179158	-0.00131769	0.0321149	0.0348796	0.098266	0.480207			-0.0144911	0.0970432	1.07627	0.0348141	0.0752594	2.1457		0.0270377	-0.0930302	-0.104135	0.0277936	0.0752811	0.448696
-0.173	0.0190999	0.000769933	0.024129	0.0333843	0.0987934	0.47926			-0.0191734	0.103713	1.2002	0.0353469	0.0727345	2.25089		0.0233261	-0.0907038	-0.116097	0.0299974	0.0762603	0.457444
-0.172	0.0185079	0.00190362	0.0208275	0.0322559	0.100029	0.478075			-0.0191734	0.108585	1.49903	0.0367826	0.0732645	2.59694		0.0237295	-0.0894529	-0.11199	0.0297615	0.0745085	0.456395
-0.171	0.0154791	0.00307439	0.0140219	0.0315664	0.100617	0.479668			-0.0168322	0.112213	1.61431	0.0357901	0.0719357	2.69017		0.0193724	-0.0845579	-0.100482	0.0298332	0.0768465	0.468317
-0.17	0.0141128	0.00414203	0.013035	0.0317278	0.10099	0.479871			-0.019466	0.116556	1.67885	0.0376838	0.0703745	2.75562		0.0178393	-0.0806249	-0.0803842	0.0299162	0.0788469	0.481632
-0.169	0.0128375	0.00496656	0.0134797	0.0329738	0.100566	0.481102			-0.0192709	0.120653	1.90986	0.0381184	0.0735958	2.95745		0.0159028	-0.075853	-0.0815455	0.0288754	0.0805517	0.480113
-0.168	0.0144771	0.00582716	0.0105747	0.0340799	0.100052	0.479487			-0.0195636	0.122955	2.11	0.0343459	0.0719058	3.14608		0.0155801	-0.0733715	-0.0850744	0.0268954	0.0824654	0.465424
-0.167	0.0162762	0.00669631	0.00705086	0.0343862	0.0997274	0.480126			-0.0216121	0.127199	2.34985	0.0350525	0.0745312	3.20871		0.0203406	-0.069773	-0.0936083	0.0287702	0.0839358	0.468538
-0.166	0.0182801	0.00745085	0.00537491	0.0335831	0.0995931	0.477435			-0.0247336	0.129377	2.55983	0.0390725	0.0730663	3.29038		0.0238909	-0.0653509	-0.100896	0.0324107	0.0840644	0.463517
-0.165	0.0164583	0.00865907	0.00565614	0.0343734	0.10004	0.487391			-0.0208317	0.132107	2.8323	0.0391197	0.0723273	3.48032		0.0248591	-0.0603193	-0.0940055	0.0323838	0.0864298	0.455538
-0.164	0.0157979	0.00971315	0.00415841	0.0368175	0.100297	0.485455			-0.0232704	0.13411	3.11748	0.0374571	0.073299	3.67427		0.0248591	-0.0537394	-0.1076	0.0284706	0.0893043	0.447901
-0.163	0.0154108	0.00997858	-0.00773197	0.0391518	0.0999435	0.482375			-0.0292208	0.134429	3.37071	0.0388757	0.0745664	3.88161		0.0263115	-0.049297	-0.102763	0.0276953	0.09213	0.450527
-0.162	0.0187811	0.0117863	-0.00677659	0.0394989	0.099797	0.491376			-0.0305864	0.135199	3.59195	0.0398831	0.0744223	4.14286		0.0267149	-0.0476487	-0.0904747	0.026564	0.0938061	0.458434
-0.161	0.0180524	0.0125089	-0.00849333	0.0404326	0.0997815	0.494902			-0.0318545	0.136472	3.96809	0.0406707	0.0723204	4.22972		0.0273604	-0.0467559	-0.10171	0.027878	0.0945122	0.466387
-0.16	0.016595	0.0132272	-0.0046039	0.04095	0.0996117	0.497147			-0.0331227	0.139783	4.1872	0.0402788	0.0715602	4.24578		0.0264729	-0.0431502	-0.101324	0.0265021	0.0964692	0.462617
-0.159	0.0124276	0.0143	0.00423027	0.0400955	0.0993406	0.499731			-0.0380976	0.142072	4.34194	0.0417052	0.071295	4.2228		0.0244557	-0.0397121	-0.097258	0.0294126	0.0949262	0.462079
-0.158	0.0096494	0.0165522	-0.00152458	0.0415922	0.0995838	0.49884			-0.0389755	0.143018	4.46482	0.040558	0.0723916	4.24637		0.0206634	-0.0369528	-0.110038	0.028872	0.0945897	0.462579
-0.157	0.00837415	0.0178865	0.00366302	0.0436274	0.10008	0.50152			-0.0409265	0.144546	4.64614	0.0378256	0.0740643	4.15269		0.0170324	-0.0356901	-0.11303	0.0273243	0.0941842	0.463177
-0.156	0.00851078	0.0190292	0.00207515	0.0415794	0.100723	0.503168			-0.0454137	0.146084	4.80733	0.0426232	0.0733683	4.15111		0.0159028	-0.0341922	-0.102751	0.0294612	0.0939694	0.461523
-0.155	0.00682561	0.0205505	-0.00433091	0.0391085	0.10112	0.500977			-0.0456088	0.147169	5.01428	0.0408168	0.0716789	4.13122		0.0148539	-0.0336066	-0.102413	0.0297445	0.0926373	0.453195
-0.154	0.00340974	0.022524	-0.00195261	0.0375236	0.10158	0.489294			-0.0431701	0.150853	5.20284	0.0430517	0.073073	4.12521		0.0121912	-0.0332104	-0.094201	0.0313386	0.0910871	0.447541
-0.153	0.000950325	0.0234143	-0.00416597	0.0378482	0.102327	0.482306			-0.045121	0.154449	5.34846	0.0445834	0.0734278	4.04967		0.00775337	-0.0305745	-0.0876988	0.0295515	0.0912302	0.452173
-0.152	0.000927553	0.0243265	0.000899308	0.0391836	0.101347	0.475276			-0.0491205	0.157899	5.42879	0.0467548	0.0735092	4.01115		0.00904437	-0.0284127	-0.0845348	0.0280803	0.0911078	0.453746
-0.151	0.00347806	0.0254636	0.00239677	0.0393069	0.100271	0.478117			-0.0490229	0.161498	5.57682	0.0441236	0.0768723	4.02144		0.00831818	-0.025769	-0.0865404	0.0290359	0.092042	0.454456
-0.15	0.00436619	0.0255228	0.00141068	0.0390716	0.0998639	0.474404			-0.047072	0.163788	5.7569	0.0441857	0.0788517	4.00138		0.0134822	-0.0234623	-0.0937125	0.0310775	0.0932911	0.458185
-0.149	0.00450283	0.0252867	-0.00365986	0.0389395	0.0985798	0.46851			-0.0525346	0.167378	6.03068	0.0486567	0.0789847	4.03459		0.0154187	-0.0221155	-0.0922856	0.0369224	0.0932942	0.455141
-0.148	0.00284044	0.0248293	-0.00723098	0.0388223	0.0975878	0.465151			-0.0520469	0.169736	6.12828	0.0485476	0.0796662	4.06888		0.0162256	-0.0220688	-0.10643	0.0370868	0.0946064	0.448404
-0.147	0.00304539	0.0250243	-0.0104647	0.0404309	0.095793	0.465041			-0.0505837	0.173897	6.26191	0.0447775	0.0802631	4.02054		0.0168711	-0.0200501	-0.0977404	0.0323141	0.0954046	0.441254
-0.146	0.0037058	0.0253084	-0.00913637	0.0438445	0.0941874	0.469588			-0.0557537	0.177632	6.33756	0.0466955	0.0793613	3.97396		0.0174359	-0.0196604	-0.107725	0.0321144	0.094847	0.438736
-0.145	0.00532264	0.0256767	-0.00482526	0.0436018	0.0940285	0.467492			-0.0618992	0.181822	6.42579	0.0484243	0.0843774	3.95724		0.0222771	-0.0181803	-0.106593	0.0309517	0.094551	0.438374
-0.144	0.00463947	0.025805	-0.00238334	0.042252	0.0928753	0.473869			-0.0609237	0.18522	6.46025	0.0469803	0.086686	3.95764		0.0188882	-0.0176445	-0.116081	0.0313516	0.0952423	0.423952
-0.143	0.00249886	0.0263513	-0.00023033	0.0428133	0.0914735	0.479531			-0.0620943	0.188055	6.47631	0.0460613	0.0876991	3.99857		0.0167097	-0.0154605	-0.101734	0.0334925	0.094937	0.432763
-0.142	-0.00162295	0.0268577	-0.0020916	0.0416838	0.0907521	0.476921			-0.0670692	0.190138	6.5721	0.0470245	0.0876782	3.95676		0.0137243	-0.0152769	-0.10094	0.0327186	0.0943149	0.418001
-0.141	-0.00408237	0.0283183	-0.00453305	0.0416829	0.0896704	0.476366			-0.0713613	0.193148	6.704	0.047046	0.0863678	3.87768		0.0115457	-0.0138992	-0.0885724	0.0331831	0.0958348	0.405475
-0.14	-0.00287544	0.0308791	0.00134691	0.0404962	0.0899283	0.479459			-0.0709711	0.192954	6.7208	0.0487034	0.0864557	3.88203		0.00920575	-0.0138152	-0.106407	0.0308134	0.093981	0.407364
-0.139	-0.00342197	0.0316527	0.00671718	0.0398725	0.089767	0.482438			-0.0735074	0.194821	6.77513	0.0484082	0.0872777	3.8912		0.00557481	-0.00930988	-0.105576	0.0307208	0.0951667	0.410566
-0.138	-0.00583586	0.0319934	0.00787232	0.0373877	0.090297	0.482512			-0.0745804	0.197345	6.83292	0.0490195	0.08899	3.86122		0.00613962	-0.0101272	-0.0934562	0.032248	0.0955617	0.416907
-0.137	-0.00802201	0.0332156	0.00834085	0.0345743	0.0901258	0.477388			-0.0747755	0.198209	7.00517	0.0495138	0.0877639	3.87866		0.00420312	-0.00860742	-0.0924194	0.0320943	0.0942104	0.418642
-0.136	-0.00957054	0.0332022	0.0173532	0.034178	0.0902188	0.47359			-0.0771166	0.202933	7.10792	0.0474563	0.0901053	3.84477		-0.000880189	-0.00842434	-0.0944492	0.0307365	0.0938493	0.416884
-0.135	-0.00838637	0.0331344	0.0192611	0.0341429	0.0895582	0.477749			-0.0782872	0.204333	7.14459	0.0531095	0.0898561	3.86637		0.00162112	-0.00937402	-0.0978178	0.0307506	0.0927313	0.401947
-0.134	-0.00467447	0.0331114	0.0161579	0.0339666	0.0890796	0.484439			-0.080921	0.204626	7.24656	0.0531657	0.0901843	3.9012		0.00250869	-0.00996429	-0.0881152	0.0313506	0.0919178	0.405229
-0.133	-0.00239722	0.0332401	0.0186781	0.0332698	0.0893224	0.489077			-0.0792627	0.204782	7.45015	0.0476615	0.0912587	4.07992		0.00686582	-0.00879566	-0.0878776	0.0354334	0.0901295	0.40547
-0.132	-0.00237445	0.0336778	0.017576	0.0347588	0.0897582	0.491148			-0.0794578	0.207803	7.58474	0.0530126	0.0920814	4.12705		0.00718857	-0.00988158	-0.0828384	0.0368334	0.0886141	0.412185
-0.131	-0.00426456	0.033905	0.0171655	0.0323727	0.0895049	0.488398			-0.0841401	0.211854	7.95383	0.0514104	0.0916737	4.29308		0.00920576	-0.00751979	-0.0741769	0.0374751	0.0884861	0.399263
-0.13	-0.00210118	0.0331174	0.0231265	0.0326231	0.0890975	0.483026			-0.0866763	0.214538	8.16244	0.0489927	0.0907385	4.35872		0.0104161	-0.00585561	-0.0827444	0.0347223	0.0891153	0.410479
-0.129	0.000654284	0.0339357	0.0242731	0.0349757	0.088341	0.485484			-0.089115	0.216288	8.30585	0.0516145	0.0886818	4.49881		0.010174	-0.00627158	-0.0849555	0.0322416	0.0886098	0.394548
-0.128	0.00174736	0.0338277	0.0231876	0.0354579	0.0885164	0.489253			-0.0918463	0.219344	8.4219	0.051048	0.0882231	4.50605		0.0149346	-0.00504843	-0.0828638	0.0347373	0.0891605	0.387182
-0.127	0.00233944	0.0339093	0.0311078	0.0338001	0.0883575	0.488249			-0.0951629	0.220102	8.60516	0.0511837	0.0902628	4.55343		0.014047	-0.00457542	-0.0865595	0.0334216	0.0874551	0.388198
-0.126	0.000654284	0.0353901	0.0295582	0.0333449	0.0886242	0.486043			-0.096236	0.222111	8.79251	0.0502852	0.0897632	4.67528		0.0121912	-0.00529273	-0.090189	0.0333845	0.0862855	0.392498
-0.125	-0.00428734	0.035484	0.035865	0.032541	0.0879308	0.484569			-0.0972114	0.221988	8.84379	0.0504831	0.0908676	4.73535		0.0082375	-0.00568123	-0.0784232	0.0317334	0.085784	0.389276
-0.124	-0.00323981	0.0353832	0.0371407	0.032146	0.0874752	0.493431			-0.10482	0.223836	8.89153	0.0507021	0.0915593	4.78057		0.00718857	-0.00538765	-0.0759444	0.0337468	0.0851479	0.39887
-0.123	-0.00160019	0.0358194	0.03516	0.032199	0.0869157	0.49158			-0.105015	0.225117	9.09568	0.0523398	0.0912631	4.90227		0.00492931	-0.00548054	-0.0752066	0.0312609	0.0846643	0.406007
-0.122	-0.00116752	0.0351664	0.0360365	0.0325976	0.0854751	0.480532			-0.106381	0.228426	9.25376	0.0506294	0.092815	5.00461		0.00501	-0.00756134	-0.0903574	0.0305001	0.0830249	0.411978
-0.121	-0.00401407	0.0353406	0.0413435	0.0338977	0.0847934	0.481865			-0.106771	0.227797	9.56589	0.0541709	0.0928325	5.26429		0.00258937	-0.00682337	-0.104893	0.0290958	0.0823277	0.415361
-0.12	-0.00526655	0.0359745	0.0394485	0.0327782	0.085235	0.482564			-0.109698	0.229477	9.66243	0.0563076	0.0923489	5.35942		0.00194387	-0.00537311	-0.0954888	0.0295635	0.0828333	0.411993
-0.119	-0.00535764	0.0362849	0.039496	0.0324426	0.0850919	0.481667			-0.110771	0.230458	9.7441	0.0535155	0.0915665	5.38874		-0.000960881	-0.00501368	-0.0998013	0.0275698	0.085007	0.412208
-0.118	-0.0022606	0.0369893	0.0329066	0.0328255	0.0846735	0.483073			-0.11438	0.232492	9.86685	0.0557144	0.0926397	5.42678		0.00218593	-0.00388482	-0.112672	0.0279926	0.0861045	0.422495
-0.117	0.00085923	0.0369962	0.0258131	0.0338199	0.0844416	0.478146			-0.114672	0.23492	9.96418	0.0575672	0.0921945	5.3896		0.00662375	-0.00382857	-0.109401	0.0321601	0.0849527	0.418388
-0.116	0.00370579	0.0372839	0.0160956	0.0352234	0.0838752	0.473299			-0.11477	0.234858	10.1295	0.0562213	0.0930489	5.34127		0.00856024	-0.00369435	-0.108899	0.030723	0.0861642	0.410989
-0.115	0.00268103	0.0380902	0.0212769	0.0352521	0.0839927	0.470154			-0.11516	0.233995	10.2415	0.0578283	0.0930389	5.29369		0.00977056	-0.00365246	-0.0998529	0.0299729	0.086312	0.414861
-0.114	0.0027038	0.037686	0.0310881	0.0348444	0.0830691	0.476618			-0.117989	0.236626	10.3426	0.0571153	0.0939817	5.2387		0.0130788	-0.00372795	-0.0931381	0.0324123	0.0851856	0.406422
-0.113	0.00541372	0.0388079	0.0252237	0.0330566	0.0832278	0.481038			-0.123452	0.238171	10.4504	0.0559134	0.095264	5.26238		0.0157414	-0.00488356	-0.0983959	0.0339307	0.0837224	0.41186
-0.112	0.00885235	0.0391443	0.0203688	0.0343854	0.0833905	0.488603			-0.124232	0.240311	10.5921	0.0551245	0.0941402	5.3743		0.0173552	-0.00557757	-0.096687	0.0339711	0.0819973	0.417958
-0.111	0.0101959	0.0390832	0.0179873	0.0349834	0.083201	0.495413			-0.1255	0.243394	10.6364	0.0557636	0.0950335	5.4275		0.0188076	-0.0035749	-0.0894211	0.035401	0.0809675	0.412458
-0.11	0.0098088	0.0397769	0.0237829	0.0355513	0.0833698	0.493432			-0.133109	0.246256	10.7051	0.0589952	0.0943352	5.46177		0.0185655	-0.00308274	-0.0931982	0.0299122	0.0803953	0.406615
-0.109	0.00680283	0.0397522	0.0174749	0.0354098	0.0838985	0.497667			-0.132134	0.250646	10.817	0.0559146	0.0943906	5.40565		0.0182427	-0.00271581	-0.085202	0.0305519	0.080695	0.417335
-0.108	0.00498104	0.0401669	0.0127276	0.0353054	0.0838726	0.497639			-0.13623	0.25497	10.8929	0.0548721	0.0995419	5.37155		0.0161449	-0.00245382	-0.0790152	0.0329828	0.0806662	0.432699
-0.107	0.00568698	0.0406953	0.0136932	0.0350262	0.0839225	0.489218			-0.141498	0.261131	10.8992	0.0562075	0.101726	5.35702		0.012756	-0.000739436	-0.0679583	0.0361779	0.0821725	0.432301
-0.106	0.00789592	0.0412075	0.00637861	0.0381997	0.0843764	0.487973			-0.144815	0.264781	10.9482	0.0561547	0.104164	5.26179		0.0159028	-0.00130961	-0.0859271	0.0352986	0.0825362	0.435992
-0.105	0.00707611	0.0417321	0.018949	0.040017	0.0841084	0.488127			-0.144522	0.268343	10.9293	0.0554903	0.10729	5.2021		0.0116264	-0.00104261	-0.0824594	0.0313459	0.0829077	0.434161
-0.104	0.00484442	0.0411849	0.027232	0.0414501	0.0844959	0.493558			-0.143449	0.272107	10.9522	0.0564924	0.107056	5.17738		0.0112229	-0.00125392	-0.0795437	0.0304462	0.0834167	0.446832
-0.103	0.0034553	0.0409862	0.0299824	0.0412745	0.0847406	0.491852			-0.147839	0.274559	11.1322	0.0607644	0.106349	5.18201		0.0104161	-0.00239382	-0.0793312	0.0311732	0.0823074	0.440124
-0.102	0.00507214	0.0408486	0.0326527	0.0410155	0.08466	0.491005			-0.149985	0.277421	11.2503	0.0559976	0.108627	5.2852		0.0104161	-0.00425449	-0.0771262	0.0307073	0.0823953	0.438371
-0.101	0.00805533	0.040886	0.0315838	0.0408332	0.0846842	0.497265			-0.149595	0.279402	11.3121	0.0547673	0.106277	5.35284		0.0142891	-0.0038775	-0.0829086	0.033894	0.0845775	0.456271
-0.1	0.0125415	0.0410012	0.0268107	0.0427327	0.0842644	0.493209			-0.152716	0.27887	11.3248	0.0607996	0.104243	5.35297		0.0186462	-0.00538187	-0.0796412	0.035162	0.0828639	0.462284
-0.099	0.0141128	0.0407858	0.0212465	0.0438054	0.0846286	0.491886			-0.152131	0.278919	11.3701	0.0579826	0.104771	5.30309		0.0225999	-0.00373001	-0.0810358	0.0304878	0.0849985	0.471911
-0.098	0.0121771	0.0406325	0.0241058	0.042719	0.0836037	0.492972			-0.153399	0.278854	11.3498	0.0579185	0.103488	5.2313		0.0209861	-0.00302839	-0.0643552	0.0324802	0.0873626	0.464348
-0.097	0.0135663	0.0397928	0.0116803	0.0408432	0.0835483	0.495792			-0.156033	0.280083	11.3384	0.0579331	0.102487	5.15914		0.0245364	-0.00338958	-0.0766074	0.0359036	0.0881073	0.471872
-0.096	0.0159801	0.0393678	0.00655113	0.0391516	0.0830076	0.4951			-0.160812	0.281322	11.3058	0.0561403	0.101283	5.11055		0.0283287	-0.00359196	-0.0874045	0.0370836	0.0880843	0.463042
-0.095	0.019897	0.0382155	0.00694987	0.0394053	0.0825996	0.497483			-0.164714	0.284508	11.2885	0.0543768	0.100176	5.05244		0.0281673	-0.0038937	-0.0892319	0.0371717	0.0892021	0.469189
-0.094	0.0201019	0.0370339	0.00657948	0.0395615	0.0824464	0.496825			-0.165007	0.285512	11.3227	0.0580724	0.0974269	4.99127		0.0299425	-0.00485771	-0.0955969	0.0358396	0.0883741	0.468231
-0.093	0.018599	0.0358531	0.0126892	0.039683	0.0819587	0.49101			-0.167933	0.287544	11.3482	0.0598188	0.0973889	4.94901		0.0287321	-0.00464254	-0.105893	0.032346	0.0887097	0.471521
-0.092	0.0152286	0.0359951	0.0129772	0.0410245	0.0824046	0.494957			-0.17125	0.289179	11.3337	0.0582832	0.096387	4.97463		0.028248	-0.00590067	-0.106718	0.0318903	0.0884746	0.468529
-0.091	0.0148871	0.0352693	0.0124974	0.0393869	0.0831341	0.496502			-0.174664	0.29041	11.3139	0.0564919	0.0948109	5.01739		0.0247784	-0.0068817	-0.100508	0.039689	0.0882219	0.468878
-0.09	0.0163217	0.0341805	0.0127017	0.039088	0.0829245	0.498642			-0.177103	0.290227	11.2788	0.0571096	0.0958494	4.98901		0.0227613	-0.00495125	-0.111476	0.0393908	0.0883054	0.46155
-0.089	0.0176425	0.0334551	0.0137767	0.0420991	0.0825229	0.498229			-0.181102	0.291229	11.2175	0.0568514	0.0949686	4.97492		0.0241329	-0.00323656	-0.101156	0.0348595	0.0895471	0.457147
-0.088	0.0167316	0.0321762	0.0123103	0.0436725	0.0822869	0.500089			-0.179444	0.292576	11.1693	0.0563923	0.0950586	4.89731		0.0237295	-0.00241671	-0.100736	0.0339674	0.0904428	0.437031
-0.087	0.0142494	0.0302268	0.0112527	0.0442212	0.0819659	0.496478			-0.176323	0.295365	11.1765	0.0570346	0.0938092	4.88768		0.0204213	-0.00230378	-0.0976952	0.0344716	0.0903997	0.445929
-0.086	0.0124049	0.0276792	0.0188442	0.0431427	0.0813432	0.494776			-0.181785	0.303326	11.1084	0.060826	0.0958389	4.8234		0.0202599	-0.00377076	-0.106704	0.0329786	0.0894268	0.450436
-0.085	0.015297	0.0256233	0.0187742	0.043489	0.0812007	0.494993			-0.185687	0.304408	11.0199	0.0544727	0.0978375	4.74963		0.0229226	-0.00586231	-0.115335	0.03453	0.0890966	0.453254
-0.084	0.0192366	0.0240958	0.0188948	0.0437714	0.0806751	0.494515			-0.185004	0.30405	11.0365	0.0527565	0.0983052	4.67445		0.0226806	-0.00775033	-0.122272	0.0343002	0.088749	0.443325
-0.083	0.0218327	0.0229662	0.0268624	0.0435508	0.0804133	0.49689			-0.183931	0.305345	11.0088	0.0582358	0.0987452	4.65063		0.0270377	-0.00696431	-0.126883	0.0350496	0.0879806	0.434921
-0.082	0.0215594	0.0214099	0.0237913	0.0449173	0.0801451	0.500507			-0.186175	0.305922	11.0143	0.0575121	0.100408	4.65646		0.03083	-0.00778605	-0.126917	0.0308643	0.0873132	0.443783
-0.081	0.0212861	0.0198005	0.0239241	0.0425092	0.0793395	0.493866			-0.185687	0.306458	10.9407	0.0570267	0.0977116	4.62433		0.0306686	-0.00941792	-0.130249	0.0341945	0.0871383	0.444499
-0.08	0.0225386	0.0179435	0.00834652	0.0409575	0.0785923	0.490107			-0.187345	0.307203	10.8538	0.0562372	0.095329	4.57697		0.0322017	-0.0103096	-0.124174	0.0366232	0.0865519	0.463412
-0.079	0.0257951	0.0164372	0.0061776	0.0383355	0.0781385	0.491127			-0.193784	0.307835	10.7707	0.0564488	0.0948739	4.5129		0.0336541	-0.00989856	-0.126298	0.0351654	0.0861708	0.463433
-0.078	0.0285733	0.014566	-0.00130218	0.0387899	0.0783505	0.491991			-0.195247	0.308617	10.6781	0.0523461	0.0944908	4.46001		0.0356713	-0.00959679	-0.135989	0.0328158	0.0856263	0.460063
-0.077	0.0282317	0.0129227	-0.000415141	0.0387236	0.0780396	0.491071			-0.194857	0.30789	10.567	0.0575005	0.0912899	4.42571		0.0363168	-0.00916692	-0.147535	0.0332204	0.0860154	0.448503
-0.076	0.0249525	0.0109119	0.00356354	0.0372828	0.0774202	0.504669			-0.1971	0.308112	10.5364	0.0595772	0.0907211	4.38516		0.0329279	-0.0100504	-0.137561	0.0332936	0.0859903	0.457233
-0.075	0.0227663	0.00938422	-0.00497545	0.0383432	0.0766063	0.498004			-0.199929	0.308958	10.4965	0.0585372	0.0912104	4.38071		0.0310721	-0.0106855	-0.133024	0.0335511	0.0862296	0.4629
-0.074	0.0224247	0.00760551	-0.00623193	0.0373425	0.0761893	0.50541			-0.202173	0.310173	10.421	0.0559016	0.0891176	4.38736		0.0286514	-0.0108789	-0.128238	0.0392602	0.0865328	0.480154
-0.073	0.0242693	0.00605189	-0.0119602	0.0361857	0.0754123	0.500998			-0.202563	0.312265	10.3122	0.054792	0.0919531	4.35107		0.0259081	-0.0112924	-0.126586	0.0380454	0.0860593	0.480307
-0.072	0.023495	0.00450339	-0.0165257	0.0382226	0.0754047	0.491811			-0.205879	0.313557	10.3118	0.0541115	0.0913575	4.34542		0.0291356	-0.0122971	-0.133831	0.032718	0.0863578	0.487358
-0.071	0.0230396	0.00273669	-0.0198048	0.0397323	0.0749169	0.491324			-0.202953	0.315139	10.3035	0.0562015	0.0920147	4.33537		0.025666	-0.0128825	-0.139031	0.0324489	0.0855861	0.48665
-0.07	0.020193	0.00113888	-0.0211414	0.0380517	0.0741997	0.492086			-0.201685	0.31832	10.2824	0.0545455	0.0914479	4.35151		0.0232454	-0.0141065	-0.13639	0.0336833	0.0858462	0.466393
-0.069	0.0193049	-0.000925394	-0.0214559	0.0379935	0.0739207	0.490387			-0.204221	0.319478	10.2423	0.0535981	0.0911425	4.36255		0.0227612	-0.0149174	-0.133924	0.0346145	0.0870466	0.474355
-0.068	0.0220604	-0.00234345	-0.0273226	0.0374355	0.0733739	0.488676			-0.204806	0.323605	10.2076	0.0543736	0.0927881	4.36555		0.0240523	-0.0148208	-0.139774	0.0321491	0.0862188	0.477887
-0.067	0.0273891	-0.00377856	-0.0305767	0.0390512	0.072595	0.484924			-0.204319	0.324915	10.1388	0.0506298	0.0919138	4.33425		0.0281673	-0.0140413	-0.147425	0.0340844	0.0865308	0.461156
-0.066	0.0270703	-0.00547664	-0.0286366	0.0373132	0.0719988	0.482675			-0.202075	0.325203	10.0554	0.0539778	0.092105	4.25005		0.0299424	-0.0144103	-0.147774	0.0317137	0.0858027	0.468558
-0.065	0.0269109	-0.00653051	-0.0276284	0.0383576	0.0716855	0.487261			-0.203246	0.32736	10.0208	0.0542621	0.0963928	4.22826		0.0334927	-0.0150159	-0.147549	0.0312887	0.0866027	0.481757
-0.064	0.0256584	-0.00805528	-0.0255812	0.0370277	0.0712525	0.487658			-0.205002	0.328867	9.97464	0.0532646	0.0970088	4.2079		0.0325244	-0.014933	-0.152579	0.0315518	0.0871087	0.473543
-0.063	0.0285961	-0.00915852	-0.0286617	0.0359166	0.0706362	0.485292			-0.204124	0.328742	9.89775	0.0515673	0.0951588	4.18911		0.0322017	-0.0142054	-0.144679	0.0337871	0.0890297	0.497215
-0.062	0.0298941	-0.0101455	-0.0289114	0.0332937	0.0697131	0.492196			-0.206172	0.330897	9.8309	0.0515028	0.0937362	4.15008		0.0341382	-0.015544	-0.143576	0.0313346	0.0894125	0.498151
-0.061	0.0316476	-0.011149	-0.0307784	0.0328422	0.0690249	0.486717			-0.208221	0.332833	9.78829	0.0500275	0.0935515	4.15288		0.0354292	-0.0162719	-0.141673	0.0287395	0.0901337	0.494975
-0.06	0.0309644	-0.0115501	-0.0328348	0.033154	0.0685125	0.491523			-0.20744	0.332987	9.72981	0.0518879	0.0913563	4.14312		0.0352678	-0.0163232	-0.152109	0.0318469	0.090603	0.491401
-0.059	0.0276852	-0.0110901	-0.0363423	0.0326117	0.0676953	0.475222			-0.20627	0.334092	9.67585	0.0528387	0.0916615	4.13543		0.03083	-0.0163364	-0.156003	0.0304813	0.0905359	0.503483
-0.058	0.0238138	-0.0105286	-0.0401394	0.0325131	0.066194	0.475304			-0.210172	0.337315	9.64421	0.0524357	0.0901194	4.15965		0.0284094	-0.0184517	-0.165692	0.0319547	0.0902133	0.509501
-0.057	0.0254079	-0.0098206	-0.038046	0.0334935	0.0661647	0.474327			-0.212708	0.338234	9.58841	0.0500885	0.0880038	4.16916		0.0274411	-0.0197106	-0.164348	0.03365	0.0895949	0.516931
-0.056	0.026797	-0.00827034	-0.0374437	0.0326845	0.0657812	0.473049			-0.209976	0.337314	9.47505	0.0482955	0.0873426	4.11847		0.0265536	-0.0204706	-0.153636	0.0327343	0.0898943	0.509394
-0.055	0.0255445	-0.00699686	-0.0321777	0.0307608	0.0658721	0.469931			-0.208806	0.337248	9.38022	0.0500536	0.0858196	4.06467		0.0236488	-0.0213171	-0.152157	0.0307821	0.0890689	0.495156
-0.054	0.0231534	-0.00372313	-0.0349981	0.0328019	0.0683246	0.47128			-0.206757	0.338179	9.25432	0.0512243	0.0871019	4.01005		0.0222771	-0.0199775	-0.153302	0.0314989	0.0881653	0.505591
-0.053	0.0205118	0.00170425	-0.0344854	0.0317952	0.0734764	0.473682			-0.205977	0.340609	9.15889	0.0504693	0.0857047	3.96858		0.019211	-0.0196285	-0.154861	0.0316463	0.0874369	0.502172
-0.052	0.0211722	0.00758013	-0.0347318	0.0318167	0.0788913	0.477074			-0.205002	0.341616	9.09457	0.0463658	0.0833451	3.94163		0.0190496	-0.0198876	-0.147402	0.031635	0.0864812	0.502953
-0.051	0.0227208	0.0114642	-0.0348947	0.0321546	0.0830279	0.482602			-0.206465	0.343134	9.00912	0.0484466	0.0868067	3.9335		0.0207441	-0.0191081	-0.138956	0.0310393	0.0849571	0.507053
-0.05	0.0266376	0.0171837	-0.0323608	0.0326355	0.0893653	0.479195			-0.203831	0.342884	8.93445	0.0467889	0.0852801	3.93495		0.0263922	-0.0185331	-0.145314	0.0340076	0.0841107	0.510834
-0.049	0.0266832	0.021312	-0.0292436	0.0320554	0.0925736	0.475831			-0.200514	0.342091	8.82668	0.0474972	0.0846975	3.89795		0.0268763	-0.0159298	-0.149842	0.0301123	0.0868606	0.508711
-0.048	0.0251802	0.0243578	-0.0301583	0.0320865	0.0948019	0.473769			-0.197588	0.342101	8.73542	0.0479514	0.0850156	3.85475		0.0267149	-0.0131624	-0.156961	0.0313746	0.0862019	0.49969
-0.047	0.0253851	0.0263011	-0.0285854	0.0336808	0.0966331	0.475492			-0.200905	0.342232	8.62187	0.0462982	0.0827756	3.79565		0.0292163	-0.00966461	-0.139887	0.0311513	0.0885661	0.504509
-0.046	0.0274119	0.0290256	-0.0316975	0.0342489	0.0981067	0.473981			-0.199441	0.343598	8.51844	0.0447026	0.0843526	3.73158		0.0300231	-0.00625892	-0.151364	0.029082	0.0891015	0.502925
-0.045	0.0280723	0.0316849	-0.039425	0.0345007	0.0991552	0.475645			-0.199734	0.34235	8.41957	0.0428411	0.0837067	3.68818		0.0304266	-0.000794846	-0.158138	0.0272562	0.0904124	0.514021
-0.044	0.0286644	0.0336511	-0.0304628	0.0349648	0.0994573	0.473769			-0.197295	0.341962	8.31088	0.0451701	0.0854301	3.65292		0.0317176	0.000785805	-0.157417	0.0302479	0.0907551	0.512951
-0.043	0.026296	0.036946	-0.0284896	0.0354492	0.101156	0.47673			-0.198466	0.340948	8.20782	0.0451207	0.0870111	3.6134		0.0309914	0.00504609	-0.156705	0.03212	0.0921718	0.509507
-0.042	0.0232445	0.0381997	-0.0354985	0.035487	0.100592	0.480873			-0.195832	0.33834	8.1024	0.0442223	0.0883668	3.5566		0.0242136	0.00623204	-0.154679	0.0311904	0.0916989	0.512985
-0.041	0.0206257	0.0402595	-0.0345142	0.0366608	0.0997489	0.477558			-0.1971	0.337431	7.99588	0.0435933	0.0906301	3.51646		0.0223578	0.0113904	-0.147263	0.0291271	0.0933441	0.502537
-0.04	0.0207168	0.041738	-0.0373228	0.037679	0.100369	0.48673			-0.197783	0.334275	7.89129	0.0443908	0.0930944	3.46912		0.0212282	0.0146529	-0.143624	0.0307333	0.0935248	0.511195
-0.039	0.0213544	0.0434255	-0.0316273	0.0363563	0.0994506	0.486349			-0.192613	0.332266	7.79879	0.0419505	0.0937863	3.41769		0.0186462	0.0210229	-0.1395	0.0308076	0.0989955	0.513609
-0.038	0.0183485	0.0433237	-0.0234802	0.0348998	0.0993004	0.491377			-0.189004	0.330125	7.69416	0.0420328	0.0946175	3.38127		0.0190496	0.0210312	-0.149984	0.0307449	0.0992195	0.495066
-0.037	0.0157752	0.0443369	-0.0242368	0.0351007	0.0987141	0.494961			-0.185687	0.326886	7.59264	0.0437894	0.0930334	3.34026		0.0154187	0.0225415	-0.163697	0.0307004	0.101542	0.478016
-0.036	0.0142267	0.0461682	-0.031264	0.0346138	0.0979843	0.484394			-0.185687	0.322625	7.48757	0.0442598	0.0921116	3.29954		0.0134015	0.0258348	-0.146845	0.0337351	0.100381	0.459385
-0.035	0.0151376	0.0471769	-0.035538	0.0368442	0.097328	0.484026			-0.183444	0.31886	7.39393	0.0399076	0.0917674	3.25167		0.0109002	0.028111	-0.139791	0.0295515	0.10004	0.459899
-0.034	0.0174603	0.0482638	-0.0420743	0.0379236	0.0970382	0.485192			-0.178469	0.316117	7.30398	0.0413232	0.0958892	3.20842		0.0159028	0.0303994	-0.128121	0.0316794	0.0988317	0.447862
-0.033	0.0191683	0.0501503	-0.0464611	0.036686	0.0960472	0.484598			-0.177591	0.312123	7.20053	0.0425273	0.0943987	3.16996		0.0192917	0.0301085	-0.120709	0.0353266	0.098722	0.428679
-0.032	0.0187356	0.0511078	-0.0516896	0.0362298	0.0953375	0.480618			-0.17047	0.311161	7.11808	0.0427901	0.0961045	3.12316		0.0209054	0.02992	-0.118865	0.0359069	0.0978197	0.416222
-0.031	0.0169366	0.052262	-0.0463787	0.0391714	0.0956879	0.486811			-0.167543	0.309119	7.01581	0.0400815	0.0964032	3.08827		0.0208248	0.0307647	-0.129423	0.0339569	0.0970113	0.42546
-0.03	0.0173465	0.0533216	-0.0376462	0.041764	0.0957611	0.485392			-0.167738	0.307559	6.92638	0.0408679	0.0932644	3.05059		0.0211475	0.0322066	-0.115113	0.0327433	0.0968268	0.42791
-0.029	0.0188039	0.0549261	-0.0317571	0.0423876	0.0963041	0.489416			-0.167836	0.307517	6.83973	0.0421398	0.0960091	3.01585		0.0228419	0.0334409	-0.121462	0.0313657	0.0977679	0.424662
-0.028	0.0207624	0.0571166	-0.028406	0.0440907	0.0960997	0.493552			-0.163446	0.309006	6.74835	0.0396667	0.0971883	2.95391		0.0253433	0.0360235	-0.130786	0.030665	0.0973653	0.430729
-0.027	0.0195327	0.0590761	-0.0214136	0.0453841	0.0973944	0.494586			-0.160325	0.310386	6.65855	0.0381184	0.101145	2.92876		0.0238909	0.0398161	-0.138325	0.0326732	0.0983968	0.437794
-0.026	0.0147504	0.0598547	-0.0264189	0.0440958	0.0983563	0.493371			-0.160227	0.31293	6.57816	0.0380723	0.100351	2.89964		0.0217123	0.0405596	-0.1407	0.0340914	0.0984816	0.433078
-0.025	0.012291	0.0605428	-0.0214162	0.0445986	0.0985891	0.490747			-0.157203	0.314099	6.49367	0.0364107	0.0989451	2.85038		0.0176779	0.0447454	-0.134068	0.0360649	0.097585	0.421031
-0.024	0.0101732	0.0635869	-0.0227328	0.0455893	0.096581	0.496485			-0.150863	0.31376	6.42248	0.0352427	0.0988856	2.82456		0.0132401	0.0454516	-0.132201	0.0326502	0.0949917	0.412951
-0.023	0.0101049	0.0668391	-0.028078	0.0445399	0.094534	0.488932			-0.154179	0.315803	6.3515	0.0365711	0.105748	2.79846		0.0143698	0.0481255	-0.12995	0.0333151	0.0943296	0.421623
-0.022	0.010287	0.0713255	-0.0257322	0.0432386	0.0928265	0.490992			-0.149204	0.317664	6.28046	0.0333592	0.107022	2.76005		0.0134822	0.0485066	-0.129173	0.034202	0.09184	0.429669
-0.021	0.00769097	0.0778732	-0.0241855	0.0404957	0.0907536	0.490661			-0.143742	0.323359	6.19506	0.034138	0.111321	2.72834		0.0117071	0.050872	-0.12077	0.0338831	0.0906761	0.435932
-0.02	0.00450283	0.081166	-0.0271396	0.0405073	0.0894515	0.491648			-0.13584	0.332759	6.11056	0.0334503	0.115065	2.70816		0.00605894	0.0532305	-0.115811	0.0352109	0.0903611	0.425398
-0.019	0.00388797	0.0855955	-0.0310454	0.0410305	0.0860132	0.490269			-0.134865	0.345082	6.03097	0.0386009	0.120741	2.68115		0.00646238	0.0571914	-0.103849	0.0336447	0.0921194	0.421135
-0.018	0.00536818	0.0918958	-0.0413781	0.0407067	0.0848759	0.491269			-0.1255	0.359906	5.94927	0.0320854	0.117123	2.66192		0.00581687	0.0590414	-0.107304	0.0327836	0.0947785	0.427714
-0.017	0.00926227	0.0989256	-0.0425041	0.0419628	0.0860651	0.495176			-0.120916	0.372483	5.87067	0.0299954	0.124196	2.63154		0.0103354	0.0639813	-0.105424	0.0331622	0.0943023	0.452474
-0.016	0.00926227	0.105226	-0.0372614	0.0410961	0.0865979	0.490364			-0.115258	0.386831	5.7945	0.0302328	0.127505	2.60206		0.0134015	0.0687961	-0.117369	0.040099	0.0942695	0.45487
-0.015	0.008989	0.112929	-0.033187	0.040239	0.087939	0.48879			-0.11038	0.401898	5.73513	0.0320638	0.131243	2.5689		0.0175166	0.0769058	-0.116626	0.0391442	0.0936689	0.45662
-0.014	0.00903454	0.120437	-0.0329841	0.0408496	0.0878354	0.486753			-0.101406	0.41994	5.67317	0.0279569	0.138424	2.56351		0.0171938	0.0843028	-0.113591	0.0389607	0.0952304	0.464013
-0.013	0.0100821	0.129554	-0.0328469	0.0445224	0.0907141	0.487242			-0.0976992	0.431767	5.59126	0.0280428	0.140777	2.54398		0.0172745	0.0911262	-0.114584	0.0353557	0.0974821	0.476971
-0.012	0.0123821	0.139601	-0.0338836	0.0447307	0.0932903	0.488139			-0.0936997	0.445297	5.52354	0.0277067	0.144396	2.52559		0.0213089	0.0981008	-0.100398	0.0367832	0.0978909	0.489354
-0.011	0.0140445	0.1504	-0.0295638	0.0445632	0.0983373	0.48911			-0.0875542	0.461206	5.45257	0.0266224	0.150263	2.49304		0.0212282	0.105262	-0.104752	0.0347299	0.0949558	0.475543
-0.01	0.0134524	0.163555	-0.0234246	0.0446332	0.101781	0.491697			-0.0754583	0.480296	5.37982	0.0218915	0.151908	2.46492		0.0208248	0.11423	-0.115443	0.0362094	0.0979427	0.48473
-0.009	0.0103326	0.172733	-0.0291232	0.0428861	0.107078	0.48647			-0.0738	0.491073	5.30094	0.019846	0.147574	2.43982		0.0184041	0.121588	-0.111772	0.0369426	0.10057	0.484536
-0.008	0.00928505	0.183552	-0.0367218	0.0437449	0.111583	0.482918			-0.0660937	0.500308	5.23328	0.0197004	0.141972	2.39915		0.015338	0.131272	-0.103036	0.0358749	0.10534	0.493321
-0.007	0.0116534	0.193779	-0.0345099	0.0424716	0.11677	0.481903			-0.0588752	0.515698	5.16828	0.0219901	0.148686	2.38901		0.0134015	0.147159	-0.0987449	0.0348561	0.117269	0.50743
-0.006	0.0125187	0.20255	-0.0323485	0.0421349	0.119692	0.486487			-0.0466818	0.529592	5.1029	0.0180628	0.151631	2.35607		0.0143698	0.161647	-0.108677	0.0331223	0.125681	0.501728
-0.005	0.0131564	0.210187	-0.0328973	0.0386066	0.123087	0.485992			-0.0389755	0.548284	5.05067	0.0177287	0.158473	2.33599		0.0147732	0.175946	-0.106616	0.0338817	0.129633	0.507413
-0.004	0.012792	0.219248	-0.0285783	0.0373985	0.127836	0.489455			-0.0248311	0.568602	4.99771	0.0183762	0.163817	2.30749		0.0138049	0.19262	-0.0858716	0.0326966	0.141625	0.521276
[truncated: 2,004 more rows]

## Sheet: +0.1mm
B		baseline						C		0-2min							18-20min
		Mean			Error					Mean			Error				Mean			Error
timelag	Airflow	DIA	ABD	Airlfow	DIA	ABD			Airflow	DIA	ABD	Airflow	DIA	ABD		Airflow	DIA	ABD	Airflow	DIA	ABD
-2	-0.834494	0.133413	-0.0205462	0.527503	0.226437	0.0927817			-0.306255	0.359059	4.25227	0.724104	0.495797	1.80712		-0.550578	0.0203735	0.571101	0.284445	0.0809554	0.153177
-1.999	-0.830143	0.13243	-0.0195492	0.526634	0.225331	0.0931391			-0.300173	0.366099	4.23563	0.730841	0.511967	1.78155		-0.546186	0.0191443	0.568722	0.284747	0.0801455	0.14588
-1.998	-0.826133	0.13085	-0.0211664	0.525434	0.222872	0.0920539			-0.294439	0.369454	4.22756	0.735029	0.511546	1.78108		-0.541092	0.0187909	0.567115	0.28105	0.0788328	0.143082
-1.997	-0.820899	0.13089	-0.0219418	0.5229	0.220079	0.0923516			-0.29218	0.372018	4.20701	0.740757	0.510246	1.77515		-0.536817	0.0178084	0.576364	0.275102	0.0776033	0.140803
-1.996	-0.816259	0.129642	-0.0216992	0.521342	0.217265	0.0927184			-0.286445	0.378992	4.18579	0.745956	0.511044	1.77937		-0.528093	0.0164696	0.587801	0.27401	0.0766564	0.143079
-1.995	-0.810516	0.129104	-0.0229425	0.518963	0.21477	0.0919515			-0.279842	0.384404	4.16388	0.750851	0.508542	1.78243		-0.520305	0.0159165	0.590971	0.274088	0.0757919	0.144925
-1.994	-0.804279	0.127744	-0.0235349	0.518789	0.21231	0.0903698			-0.273152	0.386438	4.15581	0.756988	0.506241	1.79976		-0.518197	0.0154661	0.596254	0.269001	0.0744993	0.154923
-1.993	-0.801271	0.126213	-0.0235222	0.517251	0.20941	0.0906115			-0.268199	0.391839	4.14304	0.762163	0.506655	1.79632		-0.518197	0.0143805	0.594589	0.265982	0.0739741	0.149405
-1.992	-0.798807	0.124612	-0.024252	0.515361	0.206531	0.089194			-0.260987	0.395007	4.13042	0.767527	0.510359	1.8043		-0.516206	0.0138766	0.592411	0.265821	0.0735835	0.14502
-1.991	-0.793318	0.123088	-0.0245629	0.513607	0.203947	0.0886129			-0.250995	0.395991	4.10214	0.774086	0.510084	1.79515		-0.510585	0.0138506	0.588598	0.2618	0.0738566	0.142793
-1.99	-0.788594	0.12182	-0.0247932	0.511821	0.200951	0.089172			-0.246825	0.397059	4.0958	0.779903	0.509281	1.81024		-0.508887	0.0127089	0.588361	0.258793	0.0736711	0.144989
-1.989	-0.78302	0.120021	-0.0249776	0.5105	0.198047	0.0904492			-0.23692	0.40557	4.09678	0.786845	0.517346	1.83527		-0.505725	0.0116024	0.588744	0.25968	0.0729965	0.152986
-1.988	-0.779247	0.118381	-0.0256954	0.509459	0.195281	0.0897106			-0.225972	0.410104	4.08294	0.793535	0.517226	1.83464		-0.504496	0.0117186	0.584202	0.25801	0.0723757	0.151829
-1.987	-0.774438	0.117478	-0.0265946	0.507563	0.192967	0.0900167			-0.218934	0.413353	4.06099	0.800279	0.518459	1.82455		-0.503266	0.0108421	0.591361	0.254159	0.0713447	0.153825
-1.986	-0.770903	0.116326	-0.0274567	0.506093	0.191003	0.0903016			-0.212939	0.420713	4.04854	0.806535	0.527405	1.82846		-0.501099	0.00993883	0.585971	0.251612	0.0703087	0.151914
-1.985	-0.765856	0.114871	-0.0285631	0.503511	0.189112	0.0897602			-0.204076	0.431968	4.02181	0.812561	0.54374	1.82583		-0.493195	0.00828701	0.580817	0.251108	0.069318	0.150148
-1.984	-0.759127	0.11416	-0.0280539	0.501024	0.188873	0.0894194			-0.195388	0.439154	3.99807	0.816646	0.550697	1.82584		-0.486285	0.00724128	0.577154	0.247207	0.0690973	0.148158
-1.983	-0.753145	0.112858	-0.0271231	0.500085	0.187963	0.0902338			-0.189479	0.444994	3.99473	0.823434	0.556133	1.83618		-0.482772	0.00680719	0.571448	0.244275	0.0672722	0.146436
-1.982	-0.749491	0.111679	-0.0279804	0.498149	0.186626	0.0911756			-0.181486	0.458418	3.96867	0.830598	0.562858	1.84554		-0.477443	0.0073189	0.572596	0.244607	0.0671008	0.148929
-1.981	-0.746823	0.110801	-0.0288814	0.495597	0.18919	0.0916474			-0.17271	0.464225	3.94454	0.836434	0.574647	1.84644		-0.473403	0.00588756	0.567753	0.24301	0.0662068	0.144949
-1.98	-0.740791	0.109393	-0.0296591	0.493175	0.187108	0.0917698			-0.166281	0.471635	3.91968	0.841298	0.581598	1.83365		-0.466728	0.00574964	0.561342	0.237208	0.0653667	0.149863
-1.979	-0.734792	0.107759	-0.0299106	0.490416	0.186589	0.0921433			-0.158548	0.481035	3.89411	0.846067	0.586494	1.8215		-0.458648	0.00587177	0.560324	0.234356	0.0646905	0.155814
-1.978	-0.730374	0.106455	-0.0306807	0.489671	0.184798	0.0924754			-0.148643	0.492658	3.86617	0.851456	0.600488	1.81682		-0.453143	0.00479655	0.561329	0.235225	0.0646084	0.15544
-1.977	-0.72587	0.105086	-0.0309238	0.486832	0.182558	0.0917072			-0.137695	0.504568	3.85221	0.858062	0.603012	1.81002		-0.451738	0.00391826	0.569498	0.23123	0.0642512	0.157355
-1.976	-0.722081	0.103382	-0.0316073	0.485356	0.180373	0.0922788			-0.130136	0.511642	3.82731	0.865823	0.613728	1.80073		-0.451797	0.00307919	0.578493	0.229261	0.0631748	0.168429
-1.975	-0.720194	0.101728	-0.0319525	0.48276	0.178284	0.0923464			-0.120057	0.51633	3.8219	0.870516	0.61305	1.81662		-0.450918	0.00155539	0.585446	0.226311	0.0624318	0.167533
-1.974	-0.716031	0.100141	-0.0310981	0.479692	0.176132	0.0921074			-0.108414	0.533613	3.79621	0.877525	0.631177	1.81465		-0.444126	0.000738415	0.581598	0.22499	0.0617797	0.167666
-1.973	-0.709063	0.0981537	-0.0305531	0.476842	0.174122	0.091502			-0.0974662	0.533798	3.77564	0.882308	0.634705	1.80277		-0.440437	0.000923514	0.586866	0.22157	0.0614428	0.165774
-1.972	-0.705121	0.0962995	-0.0300907	0.476479	0.172287	0.0908313			-0.0863447	0.545768	3.75684	0.890552	0.644237	1.804		-0.44114	0.00043729	0.596728	0.219583	0.0617136	0.172122
-1.971	-0.701178	0.0944197	-0.0287143	0.475299	0.170526	0.0904102			-0.0719215	0.558978	3.73948	0.897656	0.651785	1.81214		-0.440027	0.000806806	0.596683	0.220839	0.0628154	0.174476
-1.97	-0.696947	0.0922246	-0.0286657	0.472961	0.168165	0.0897504			-0.0634066	0.567726	3.70976	0.903672	0.666152	1.79397		-0.435284	0.000694275	0.596016	0.217886	0.0626164	0.177839
-1.969	-0.692206	0.0905403	-0.0287374	0.470233	0.166115	0.0896351			-0.0532408	0.576903	3.67771	0.908885	0.671025	1.78678		-0.433176	0.000238473	0.591951	0.213919	0.0615393	0.176912
-1.968	-0.687787	0.088728	-0.0285938	0.46782	0.16366	0.0896722			-0.040034	0.587382	3.68728	0.914873	0.682104	1.80729		-0.427028	0.000123567	0.594349	0.213906	0.0602647	0.177507
-1.967	-0.68116	0.0874003	-0.0273832	0.465409	0.161511	0.090015			-0.027696	0.598405	3.67479	0.922209	0.689799	1.79975		-0.417952	-0.000214126	0.591871	0.214511	0.0593091	0.179984
-1.966	-0.675994	0.0860263	-0.0265494	0.463138	0.159972	0.0911128			-0.0170958	0.606277	3.66193	0.928245	0.689969	1.78007		-0.417074	-0.000271164	0.590454	0.209699	0.0591308	0.179949
-1.965	-0.672799	0.0851457	-0.0271021	0.461948	0.158284	0.0909323			-0.00649563	0.613824	3.64347	0.935955	0.694007	1.77583		-0.413502	-0.000434156	0.592998	0.208603	0.0584419	0.177366
-1.964	-0.66889	0.0838421	-0.0276066	0.459423	0.157182	0.0902204			0.00479966	0.623052	3.62677	0.939987	0.697386	1.78105		-0.40712	-0.000415897	0.599089	0.208094	0.0580121	0.171202
-1.963	-0.662943	0.0827094	-0.0269216	0.455554	0.155164	0.0900714			0.0155736	0.638291	3.60206	0.94858	0.705707	1.77737		-0.397693	-0.000528481	0.596356	0.204387	0.0579788	0.169627
-1.962	-0.657403	0.0811248	-0.0268789	0.453244	0.153036	0.0901904			0.0243492	0.652505	3.56551	0.952626	0.716901	1.76319		-0.394062	0.000390724	0.59767	0.200687	0.0589876	0.167315
-1.961	-0.652882	0.0798519	-0.0262761	0.452303	0.151182	0.0917149			0.0397282	0.659097	3.55087	0.957902	0.712287	1.77287		-0.3909	0.000135338	0.591869	0.199814	0.0596841	0.166849
-1.96	-0.649348	0.0787201	-0.0263689	0.449517	0.149065	0.0920058			0.0538908	0.662581	3.54088	0.965576	0.707514	1.7885		-0.387621	-9.29326e-05	0.591377	0.198962	0.0592962	0.164828
-1.959	-0.645116	0.0774731	-0.0267559	0.446963	0.146885	0.091638			0.0658812	0.671696	3.53583	0.974681	0.716891	1.78582		-0.389554	-0.000417057	0.588898	0.197153	0.0597842	0.162805
-1.958	-0.642465	0.0763655	-0.0263338	0.445327	0.145093	0.0915215			0.0776109	0.67788	3.50565	0.978323	0.723146	1.76746		-0.386626	-0.00019801	0.593879	0.192961	0.0591081	0.171093
-1.957	-0.638115	0.0750993	-0.0259324	0.441847	0.143044	0.0907827			0.0935112	0.67998	3.48539	0.983356	0.720416	1.77265		-0.382176	-0.00141479	0.589603	0.19483	0.0591353	0.171725
-1.956	-0.631419	0.0739025	-0.0268329	0.439132	0.141231	0.0906121			0.106631	0.690879	3.46133	0.991129	0.730976	1.76619		-0.377491	-0.00104984	0.589695	0.192737	0.0598996	0.165453
-1.955	-0.627154	0.0729232	-0.0276069	0.438035	0.139421	0.0903512			0.121923	0.705955	3.44591	0.999182	0.743388	1.77689		-0.378136	-0.00187727	0.589216	0.19009	0.0586726	0.165145
-1.954	-0.624061	0.0721696	-0.0276711	0.437195	0.137687	0.0904138			0.138084	0.711697	3.43213	1.00373	0.749224	1.78574		-0.378194	-0.0031356	0.58479	0.189356	0.058714	0.164856
-1.953	-0.619473	0.0711276	-0.0268096	0.43429	0.136377	0.0911095			0.152855	0.718994	3.40729	1.01394	0.757065	1.78008		-0.372807	-0.00442763	0.581641	0.190062	0.0580528	0.166186
-1.952	-0.613763	0.0703178	-0.0274891	0.431795	0.134904	0.0910854			0.162934	0.725598	3.38989	1.01933	0.759647	1.76707		-0.369352	-0.00463841	0.584627	0.186931	0.0585095	0.174551
-1.951	-0.608325	0.0695928	-0.0280112	0.429592	0.133892	0.0914758			0.176749	0.731914	3.35537	1.02623	0.763945	1.75473		-0.365078	-0.00578479	0.59195	0.183728	0.0580943	0.175024
-1.95	-0.602258	0.0688879	-0.0271713	0.427943	0.132841	0.0916245			0.19291	0.74166	3.32498	1.03321	0.765804	1.73651		-0.358754	-0.0054802	0.593146	0.185047	0.0590658	0.175696
-1.949	-0.597415	0.0682091	-0.0276655	0.425429	0.131647	0.0921083			0.210027	0.754312	3.30352	1.04037	0.771353	1.73792		-0.355358	-0.0063433	0.59208	0.182961	0.0590404	0.171471
-1.948	-0.59298	0.0672786	-0.0274456	0.422994	0.13009	0.092782			0.222104	0.768687	3.28602	1.04642	0.78121	1.73975		-0.352196	-0.00737998	0.590278	0.180516	0.0590278	0.165749
-1.947	-0.5897	0.0664717	-0.0282395	0.421099	0.128943	0.09201			0.235224	0.784686	3.26968	1.05067	0.792267	1.74915		-0.347512	-0.0083305	0.588839	0.180626	0.0589398	0.164501
-1.946	-0.583056	0.0657404	-0.0284242	0.417097	0.127394	0.0927993			0.248431	0.802525	3.23364	1.05724	0.808382	1.73513		-0.33703	-0.00971038	0.58948	0.178392	0.0581495	0.159684
-1.945	-0.577618	0.065021	-0.0283215	0.414845	0.126265	0.0919528			0.264592	0.811748	3.21632	1.06395	0.806689	1.74194		-0.334044	-0.0112045	0.58673	0.173097	0.0577252	0.156539
-1.944	-0.572299	0.0646781	-0.0280315	0.413903	0.125212	0.0911757			0.279189	0.821685	3.19224	1.06956	0.811427	1.72462		-0.333576	-0.012643	0.5883	0.172921	0.057228	0.158749
-1.943	-0.571211	0.0635971	-0.0266824	0.412121	0.12359	0.0904777			0.296218	0.832757	3.20289	1.07817	0.812924	1.73475		-0.331702	-0.0130898	0.589182	0.174933	0.0576696	0.155592
-1.942	-0.566283	0.0633951	-0.0265729	0.408827	0.122837	0.0909986			0.312814	0.847011	3.18093	1.08378	0.823801	1.72126		-0.331175	-0.0143729	0.588498	0.173348	0.0575398	0.153563
-1.941	-0.561864	0.0628765	-0.0266284	0.407376	0.121608	0.0900865			0.325239	0.85392	3.16494	1.09066	0.824836	1.71885		-0.328774	-0.0143534	0.589001	0.16926	0.0586014	0.153564
-1.94	-0.557072	0.0621281	-0.0268701	0.404173	0.12046	0.0905928			0.343398	0.863538	3.1406	1.09408	0.829917	1.71107		-0.324851	-0.015583	0.593029	0.17084	0.0584977	0.158529
-1.939	-0.551328	0.0614657	-0.0269348	0.401214	0.119814	0.0903563			0.361123	0.865585	3.12272	1.1046	0.827157	1.70585		-0.32327	-0.0166298	0.589529	0.170552	0.0587304	0.156913
-1.938	-0.546417	0.0610654	-0.026824	0.400938	0.11874	0.0912495			0.376763	0.87985	3.09052	1.11098	0.834626	1.69635		-0.323914	-0.0180509	0.587666	0.166431	0.0582696	0.15965
-1.937	-0.544667	0.0600428	-0.0251643	0.399492	0.117715	0.0913294			0.395704	0.889641	3.05734	1.11736	0.825373	1.68053		-0.324441	-0.0191207	0.583767	0.166428	0.058977	0.158165
-1.936	-0.540096	0.0595016	-0.0255267	0.396283	0.116922	0.0915252			0.412647	0.893538	3.03019	1.12383	0.82376	1.66756		-0.31964	-0.0199762	0.589934	0.169206	0.0580939	0.159888
-1.935	-0.533264	0.0591622	-0.0252438	0.394205	0.115793	0.0920992			0.42846	0.902777	2.99785	1.13086	0.825059	1.65461		-0.31437	-0.021112	0.591487	0.165937	0.0572683	0.15984
-1.934	-0.526501	0.0582999	-0.0246002	0.391885	0.11455	0.0916922			0.441754	0.909529	2.97283	1.1361	0.824895	1.63739		-0.308515	-0.0225522	0.595122	0.162498	0.0566586	0.159558
-1.933	-0.522575	0.0576945	-0.0248964	0.389912	0.113769	0.0913607			0.460782	0.918169	2.9366	1.14301	0.83108	1.61429		-0.305294	-0.0239369	0.594863	0.16368	0.0557365	0.161087
-1.932	-0.518344	0.0567484	-0.0253344	0.38805	0.112325	0.091729			0.47816	0.923217	2.90659	1.14993	0.820471	1.59599		-0.302483	-0.0250481	0.592783	0.163417	0.0540057	0.16295
-1.931	-0.513823	0.0563266	-0.0245105	0.385507	0.111328	0.0918325			0.492409	0.940648	2.889	1.1566	0.816273	1.57882		-0.299263	-0.0263785	0.589182	0.1586	0.053354	0.165723
-1.93	-0.510425	0.0549589	-0.0245615	0.383679	0.109917	0.0902914			0.50718	0.954934	2.8663	1.16027	0.822191	1.56274		-0.293993	-0.0277222	0.583492	0.157732	0.0526502	0.168695
-1.929	-0.503831	0.0540968	-0.0245602	0.379725	0.109178	0.0900441			0.523688	0.966463	2.85125	1.16657	0.833211	1.56712		-0.284624	-0.0274462	0.582823	0.158247	0.0524383	0.171452
-1.928	-0.498954	0.0527574	-0.0238846	0.376991	0.107863	0.0896398			0.542282	0.983777	2.82514	1.17389	0.845818	1.5572		-0.282165	-0.0276802	0.584515	0.153343	0.0522955	0.168711
-1.927	-0.494196	0.0517377	-0.0240286	0.376047	0.10675	0.0903815			0.556358	0.998153	2.79529	1.17845	0.861419	1.54635		-0.284097	-0.0290214	0.583611	0.152031	0.0521426	0.165664
-1.926	-0.49236	0.0504218	-0.0243466	0.374472	0.10569	0.0905597			0.577471	1.00516	2.78028	1.18371	0.865022	1.55692		-0.282458	-0.0294781	0.586812	0.153925	0.0518103	0.163068
-1.925	-0.488962	0.0493875	-0.024701	0.370768	0.104643	0.0899809			0.595109	1.01624	2.76082	1.19195	0.862539	1.54028		-0.280526	-0.0300642	0.590793	0.153793	0.0514817	0.160905
-1.924	-0.483762	0.0484266	-0.0245972	0.368956	0.103466	0.0900347			0.610923	1.03266	2.75498	1.19707	0.857488	1.52419		-0.279706	-0.030984	0.59195	0.148963	0.0512541	0.162652
-1.923	-0.479122	0.0473449	-0.0248038	0.366358	0.10281	0.0902827			0.628648	1.04561	2.72684	1.20072	0.858796	1.51172		-0.275724	-0.0320948	0.589389	0.148681	0.051215	0.158669
-1.922	-0.47467	0.0461856	-0.0257468	0.363957	0.101743	0.0904429			0.649587	1.05215	2.70036	1.20737	0.85575	1.50429		-0.274553	-0.0324161	0.58673	0.152543	0.052039	0.15792
-1.921	-0.471475	0.044933	-0.0267358	0.363355	0.100614	0.0897575			0.669745	1.06482	2.68216	1.21414	0.853539	1.4847		-0.277774	-0.0332588	0.588133	0.147798	0.0522219	0.166631
-1.92	-0.467312	0.0438496	-0.0262407	0.361657	0.0992559	0.0893478			0.686167	1.08018	2.67807	1.21932	0.858812	1.48252		-0.277247	-0.0343276	0.588507	0.147349	0.0520687	0.166675
-1.919	-0.463981	0.0421172	-0.0259826	0.359428	0.0982351	0.0887468			0.706411	1.08507	2.65144	1.22297	0.854111	1.47166		-0.271684	-0.0344223	0.592075	0.149003	0.0522057	0.168724
-1.918	-0.457336	0.0410299	-0.0262599	0.355957	0.0972541	0.0870104			0.72405	1.10341	2.62928	1.2296	0.85241	1.46071		-0.264013	-0.0343889	0.589486	0.148112	0.0524679	0.17283
-1.917	-0.451236	0.0399345	-0.0257285	0.353475	0.0959231	0.0866159			0.738125	1.12021	2.60968	1.23476	0.850644	1.44932		-0.263428	-0.0350068	0.586831	0.144593	0.0526112	0.177524
-1.916	-0.447021	0.0393721	-0.025661	0.352469	0.0954031	0.0862642			0.758804	1.1338	2.5913	1.23815	0.845993	1.4567		-0.258509	-0.0356773	0.59137	0.14253	0.0531923	0.180612
-1.915	-0.444863	0.0387742	-0.0262489	0.350334	0.0954478	0.0867438			0.776877	1.14358	2.56952	1.24171	0.845934	1.45456		-0.257807	-0.0364693	0.59362	0.144373	0.05339	0.183631
-1.914	-0.440122	0.0382058	-0.0267399	0.347911	0.0957042	0.0867174			0.794167	1.15279	2.56926	1.24735	0.84764	1.44991		-0.252068	-0.0369184	0.595517	0.13856	0.0540373	0.179558
-1.913	-0.435704	0.0371281	-0.0248711	0.34518	0.0956456	0.0865321			0.810328	1.16555	2.54816	1.25098	0.853636	1.44808		-0.247208	-0.0380825	0.598021	0.138583	0.0540725	0.178251
-1.912	-0.430877	0.0366033	-0.0254585	0.341889	0.0953479	0.086464			0.828401	1.17139	2.52106	1.25229	0.854742	1.43647		-0.240357	-0.0393649	0.590789	0.138629	0.0535211	0.180204
-1.911	-0.426374	0.0352441	-0.025868	0.33862	0.0947362	0.0863339			0.848819	1.1827	2.4941	1.25868	0.858102	1.42421		-0.237664	-0.0391758	0.590047	0.135792	0.0549458	0.180419
-1.91	-0.422482	0.034184	-0.0258875	0.337578	0.0939813	0.0861569			0.86637	1.20072	2.47398	1.26433	0.864264	1.42424		-0.240767	-0.0402973	0.590872	0.134271	0.0550811	0.182328
-1.909	-0.421514	0.0328223	-0.026023	0.336196	0.0929667	0.0849269			0.885225	1.2088	2.45151	1.26459	0.867833	1.40953		-0.241938	-0.0409318	0.593556	0.134246	0.055153	0.18575
-1.908	-0.418336	0.0318807	-0.0270766	0.333357	0.0919343	0.0847143			0.906946	1.21905	2.42391	1.26776	0.867764	1.39392		-0.239655	-0.0415976	0.596874	0.135138	0.0549203	0.194687
-1.907	-0.413017	0.0308163	-0.0266677	0.330482	0.0908086	0.0850796			0.925714	1.23911	2.39874	1.27335	0.876209	1.38163		-0.236317	-0.0419917	0.59754	0.132287	0.0546595	0.191262
-1.906	-0.409346	0.0299182	-0.0280956	0.327954	0.0900238	0.0848146			0.945872	1.25918	2.37198	1.27284	0.879035	1.36866		-0.236551	-0.0421647	0.598213	0.131252	0.0552219	0.184831
-1.905	-0.405098	0.0284605	-0.027755	0.326649	0.0891678	0.0842337			0.968897	1.28031	2.34762	1.27657	0.883221	1.3556		-0.236024	-0.0427528	0.608865	0.132638	0.0560728	0.190252
-1.904	-0.402107	0.0274303	-0.0273713	0.324782	0.0884272	0.0845429			0.986448	1.29041	2.32385	1.28009	0.88621	1.34533		-0.235673	-0.0427349	0.612079	0.131789	0.0561879	0.18137
-1.903	-0.398504	0.0265096	-0.0280214	0.323934	0.0876783	0.0841224			1.00539	1.30549	2.31431	1.28453	0.884022	1.34514		-0.237196	-0.0431425	0.610366	0.128731	0.0559111	0.179094
-1.902	-0.394647	0.0252856	-0.0282251	0.320912	0.0873181	0.0849825			1.02381	1.32323	2.29433	1.28054	0.888419	1.33421		-0.231047	-0.0440754	0.612722	0.128222	0.055433	0.172073
-1.901	-0.389379	0.0242453	-0.0274825	0.317374	0.0864864	0.0846536			1.0484	1.33787	2.27984	1.28541	0.886013	1.32368		-0.225133	-0.0453335	0.610942	0.129295	0.055453	0.166006
-1.9	-0.383193	0.0227318	-0.0275801	0.314851	0.0855208	0.0854115			1.06386	1.36098	2.25459	1.28868	0.892989	1.30999		-0.22244	-0.0457639	0.607543	0.12663	0.0547962	0.163683
-1.899	-0.380049	0.0211434	-0.0275585	0.314646	0.0849751	0.0851231			1.08281	1.38174	2.22888	1.28692	0.888422	1.29677		-0.222498	-0.0452203	0.604495	0.124191	0.0545758	0.159654
-1.898	-0.377262	0.0195485	-0.0271703	0.311782	0.0841471	0.0855548			1.10375	1.39436	2.20011	1.28545	0.876393	1.28161		-0.218927	-0.0457232	0.60441	0.124585	0.053921	0.155111
-1.897	-0.374034	0.0179375	-0.0277015	0.308806	0.0832735	0.0849489			1.12338	1.40905	2.17441	1.28904	0.874982	1.27006		-0.212954	-0.0451641	0.599644	0.120574	0.0541364	0.153086
-1.896	-0.368256	0.0165055	-0.0276845	0.305161	0.082428	0.086075			1.13885	1.4198	2.15031	1.2885	0.86796	1.26031		-0.210553	-0.0441048	0.601226	0.119492	0.0532184	0.149804
-1.895	-0.365061	0.0151513	-0.0281214	0.303406	0.0816556	0.0868243			1.16013	1.43239	2.13807	1.28462	0.86347	1.24864		-0.204932	-0.0441122	0.599615	0.120388	0.0522222	0.144915
-1.894	-0.361849	0.0138282	-0.0269168	0.300825	0.0808649	0.0868174			1.18246	1.44633	2.12385	1.28521	0.867214	1.23003		-0.204815	-0.0438039	0.599941	0.119686	0.0519848	0.149599
-1.893	-0.358654	0.0126845	-0.0263152	0.298853	0.0805157	0.0854667			1.20201	1.45358	2.10062	1.28536	0.870996	1.21231		-0.206162	-0.0422775	0.597726	0.117078	0.0510944	0.146606
-1.892	-0.357159	0.011203	-0.0263119	0.297566	0.079483	0.0854028			1.22122	1.47053	2.08046	1.28362	0.875201	1.19472		-0.208855	-0.0401699	0.602115	0.115552	0.0510593	0.157829
-1.891	-0.355018	0.00938692	-0.0255216	0.29417	0.0786101	0.0850801			1.2452	1.49009	2.06108	1.28116	0.876234	1.17629		-0.206396	-0.0387241	0.598879	0.116668	0.0513185	0.159483
-1.89	-0.349597	0.00760287	-0.0252293	0.290968	0.0779831	0.0837368			1.26483	1.49885	2.03597	1.2838	0.87467	1.16406		-0.203644	-0.0378464	0.595852	0.11601	0.0519409	0.159174
-1.889	-0.344669	0.00591574	-0.0253144	0.288789	0.0772425	0.0843498			1.2856	1.49827	2.01323	1.28067	0.870932	1.14632		-0.205225	-0.0349006	0.592379	0.11434	0.0543998	0.159556
-1.888	-0.342544	0.00415669	-0.0243521	0.28916	0.0763539	0.0849025			1.30975	1.50861	1.98851	1.27535	0.868841	1.13109		-0.206747	-0.0332874	0.59365	0.115336	0.0552113	0.161647
-1.887	-0.341049	0.00246183	-0.0250665	0.285989	0.0753136	0.0836371			1.33069	1.53064	1.97372	1.27588	0.876907	1.11287		-0.20622	-0.0324242	0.595573	0.114221	0.0568991	0.165048
-1.886	-0.336699	0.00112455	-0.0251579	0.284419	0.0742293	0.0831118			1.3512	1.54018	1.95117	1.27639	0.870267	1.09497		-0.207099	-0.0316291	0.592922	0.11177	0.0581983	0.1703
-1.885	-0.33313	-0.000306685	-0.0240684	0.282276	0.0732587	0.0821079			1.36771	1.55261	1.93314	1.26981	0.856136	1.08817		-0.202883	-0.0298562	0.591115	0.111831	0.058976	0.171232
-1.884	-0.32759	-0.00180522	-0.0237115	0.278918	0.072423	0.081648			1.39282	1.57412	1.91586	1.26637	0.851287	1.07513		-0.197496	-0.0299717	0.589787	0.113169	0.0587656	0.167958
-1.883	-0.323766	-0.00311961	-0.0242728	0.276045	0.0719398	0.0819067			1.41072	1.58179	1.90189	1.26682	0.847614	1.05932		-0.193221	-0.0299515	0.593862	0.111424	0.0582756	0.164224
-1.882	-0.3203	-0.00432986	-0.0234492	0.274799	0.0715684	0.0813309			1.43209	1.60132	1.88315	1.26014	0.844887	1.04756		-0.195856	-0.029055	0.598536	0.108677	0.0574751	0.162734
-1.881	-0.319144	-0.00511232	-0.0232025	0.273583	0.0704053	0.0828134			1.44938	1.62148	1.86713	1.25318	0.847381	1.03655		-0.193865	-0.0286827	0.598742	0.108011	0.0576205	0.16306
-1.88	-0.315796	-0.00626096	-0.0245555	0.269972	0.0699501	0.0827153			1.47076	1.65231	1.85611	1.25119	0.846379	1.02942		-0.1876	-0.0292626	0.601002	0.106787	0.0570762	0.163467
-1.879	-0.311021	-0.0069076	-0.0249263	0.266117	0.0689278	0.0814162			1.48952	1.67325	1.84319	1.24875	0.844908	1.02683		-0.18397	-0.0291177	0.60126	0.106683	0.0568231	0.163662
-1.878	-0.306229	-0.00756264	-0.0260305	0.26467	0.0685411	0.0822296			1.50994	1.69202	1.82603	1.24054	0.847133	1.02278		-0.180222	-0.0289957	0.609204	0.105121	0.0558778	0.172693
-1.877	-0.30543	-0.0075407	-0.026209	0.262647	0.0676507	0.0817547			1.53149	1.71763	1.80895	1.23582	0.857368	1.01743		-0.181101	-0.0294767	0.608307	0.104436	0.0550635	0.172062
-1.876	-0.302881	-0.00801582	-0.0275203	0.2598	0.0672509	0.0817379			1.55199	1.73771	1.78679	1.23327	0.844206	1.00249		-0.183911	-0.0296244	0.608196	0.103531	0.055705	0.170805
-1.875	-0.301692	-0.0077406	-0.0268691	0.258787	0.0677761	0.081807			1.57163	1.75306	1.77244	1.22717	0.835077	0.99364		-0.186546	-0.029298	0.616807	0.101562	0.0565141	0.171254
-1.874	-0.299278	-0.00826567	-0.0277244	0.255576	0.0675353	0.0808405			1.59318	1.77205	1.75678	1.22254	0.82157	0.988103		-0.184965	-0.0291099	0.617721	0.101177	0.0564913	0.170403
-1.873	-0.295523	-0.00857637	-0.0282772	0.252277	0.067174	0.0792965			1.61534	1.78042	1.73981	1.21869	0.811431	0.979322		-0.181393	-0.0302302	0.617119	0.101967	0.0557045	0.162322
-1.872	-0.290969	-0.00888173	-0.0279283	0.250265	0.066678	0.0790149			1.63619	1.79389	1.72021	1.2138	0.804831	0.963224		-0.183618	-0.0303316	0.629442	0.101088	0.0556021	0.15623
-1.871	-0.289745	-0.00937768	-0.0278654	0.25034	0.0659489	0.0786433			1.65565	1.79932	1.70429	1.20567	0.799123	0.951306		-0.185961	-0.0308134	0.629914	0.0999285	0.0551502	0.160441
-1.87	-0.288912	-0.00966824	-0.0275776	0.247726	0.0651392	0.0791995			1.67798	1.80261	1.6924	1.19909	0.784764	0.94412		-0.186956	-0.030819	0.633155	0.0998237	0.0536697	0.164348
-1.869	-0.285446	-0.00954034	-0.0275293	0.24446	0.0642643	0.078276			1.69788	1.80561	1.67243	1.19912	0.784106	0.9331		-0.184438	-0.0309922	0.62948	0.0987982	0.053143	0.161542
-1.868	-0.281435	-0.00941739	-0.0278502	0.243413	0.0631827	0.0775921			1.71499	1.81744	1.65437	1.18807	0.770732	0.920789		-0.18233	-0.0313149	0.625551	0.0968975	0.0533606	0.160868
-1.867	-0.277816	-0.00890405	-0.0280165	0.240442	0.0629041	0.0774445			1.73585	1.82415	1.65235	1.18063	0.765873	0.908074		-0.17747	-0.0303441	0.62843	0.0973715	0.0529117	0.157034
-1.866	-0.274468	-0.00867171	-0.0269466	0.238349	0.0624907	0.0785922			1.75601	1.83968	1.64942	1.17607	0.76869	0.901294		-0.175421	-0.0305392	0.626191	0.0975087	0.0526744	0.155669
-1.865	-0.272089	-0.00777468	-0.0279689	0.236557	0.0624691	0.0779188			1.77338	1.84322	1.63366	1.16948	0.765474	0.891941		-0.175479	-0.0313297	0.625495	0.0943327	0.0522383	0.150555
-1.864	-0.271222	-0.00746581	-0.0284101	0.235931	0.062402	0.0780018			1.79102	1.85012	1.61522	1.16187	0.773391	0.881661		-0.175304	-0.0312419	0.629426	0.0926162	0.0513502	0.15104
-1.863	-0.268826	-0.00669284	-0.0285608	0.231994	0.0619656	0.0777534			1.80901	1.8586	1.59879	1.15502	0.771965	0.874173		-0.16693	-0.0307342	0.624803	0.0921873	0.051299	0.152258
-1.862	-0.264085	-0.00529812	-0.0288784	0.229187	0.0618129	0.0780971			1.82812	1.87366	1.58333	1.15094	0.775499	0.865461		-0.163066	-0.0312321	0.622633	0.0917215	0.0511823	0.153556
-1.861	-0.261196	-0.00494358	-0.029577	0.228077	0.0616862	0.0781604			1.84533	1.90091	1.56556	1.14098	0.789606	0.855334		-0.163651	-0.0315554	0.617943	0.0904416	0.0511995	0.154008
-1.86	-0.260669	-0.00401557	-0.0295685	0.226515	0.0618739	0.0794337			1.86592	1.91589	1.54623	1.1335	0.794112	0.843639		-0.16494	-0.0307152	0.618344	0.0914932	0.0516939	0.151492
-1.859	-0.260329	-0.00257155	-0.0306873	0.222772	0.062281	0.0793033			1.88416	1.9491	1.54261	1.12692	0.800424	0.839347		-0.165818	-0.0313149	0.615536	0.0909498	0.0518297	0.150773
-1.858	-0.258392	-0.00132175	-0.0304765	0.22151	0.062748	0.0788454			1.90224	1.96197	1.5359	1.12141	0.792298	0.840255		-0.166345	-0.0313542	0.615026	0.0873475	0.0519171	0.149266
-1.857	-0.256913	-0.000426307	-0.0291374	0.219763	0.063075	0.0802333			1.91927	1.97059	1.52543	1.11256	0.785401	0.832975		-0.167399	-0.0309649	0.615983	0.0863867	0.0527799	0.14884
-1.856	-0.254738	0.000134964	-0.0289079	0.216191	0.0628303	0.0802913			1.9416	1.97653	1.5121	1.10658	0.773717	0.824058		-0.16412	-0.0312763	0.623536	0.0885235	0.0525269	0.148431
-1.855	-0.251543	0.00056649	-0.0295278	0.214268	0.0626705	0.080676			1.96054	1.99548	1.50681	1.09913	0.765678	0.819382		-0.166228	-0.0316528	0.626188	0.0871655	0.0521151	0.146233
-1.854	-0.250711	0.000735732	-0.0287078	0.213617	0.061924	0.0796435			1.9767	2.00531	1.49978	1.09148	0.764533	0.816661		-0.169273	-0.0320341	0.623422	0.0843384	0.0516963	0.15138
-1.853	-0.250813	0.0012215	-0.0291252	0.211858	0.061572	0.0800159			1.99573	2.01131	1.4847	1.08358	0.764731	0.805671		-0.168687	-0.0323634	0.621494	0.0845535	0.0510928	0.153774
-1.852	-0.247703	0.0017006	-0.0296175	0.208711	0.0617464	0.0811427			2.01284	2.04399	1.46732	1.07921	0.760044	0.79689		-0.16371	-0.0327583	0.622952	0.0859319	0.0502422	0.15749
-1.851	-0.244372	0.00230136	-0.0285509	0.207699	0.0618681	0.0821234			2.02675	2.0599	1.45498	1.07191	0.763962	0.787166		-0.161836	-0.0331592	0.616849	0.0809295	0.0510599	0.156669
-1.85	-0.240956	0.00247137	-0.0299219	0.205758	0.061449	0.0834027			2.04343	2.07315	1.44299	1.06174	0.768646	0.777558		-0.159201	-0.0330283	0.617148	0.0832629	0.0510719	0.154544
-1.849	-0.239767	0.00368191	-0.0306799	0.204678	0.0621545	0.0837267			2.06359	2.09394	1.42648	1.05281	0.780718	0.766223		-0.157152	-0.0336268	0.616129	0.0837869	0.0509875	0.151066
-1.848	-0.238135	0.00404158	-0.0298912	0.202998	0.0622407	0.0824695			2.07905	2.10784	1.40527	1.04936	0.776109	0.758248		-0.155688	-0.0331505	0.620547	0.0815618	0.05126	0.149756
-1.847	-0.23715	0.00460379	-0.0307753	0.201849	0.0630629	0.0822823			2.09113	2.13124	1.39096	1.041	0.774022	0.751372		-0.154341	-0.0330038	0.618744	0.0792119	0.051235	0.148719
-1.846	-0.235705	0.00477679	-0.0311145	0.19884	0.0631485	0.0826713			2.10555	2.13469	1.38356	1.03138	0.768193	0.747658		-0.146671	-0.032988	0.619417	0.0805594	0.0523075	0.1552
-1.845	-0.233224	0.005554	-0.0303106	0.196745	0.0632835	0.0823128			2.1218	2.14709	1.37829	1.02459	0.759735	0.745182		-0.143392	-0.0331386	0.618061	0.0791841	0.0526364	0.153238
-1.844	-0.230828	0.00588409	-0.0307098	0.195041	0.0641281	0.0814			2.13718	2.15777	1.37095	1.01699	0.754303	0.73588		-0.144329	-0.034367	0.616737	0.0755951	0.0525534	0.149376
-1.843	-0.231797	0.00567223	-0.0291457	0.193979	0.0652704	0.0832198			2.15334	2.16105	1.36834	1.00736	0.750675	0.732697		-0.146963	-0.0350505	0.618464	0.0769478	0.0522777	0.147707
-1.842	-0.232001	0.00541836	-0.0298763	0.192027	0.0654948	0.0827817			2.1682	2.16921	1.35799	1.00142	0.745792	0.728943		-0.147315	-0.0352894	0.619251	0.0787815	0.0516808	0.149464
-1.841	-0.230182	0.00493662	-0.0301595	0.188891	0.0651413	0.0826364			2.18158	2.18293	1.35533	0.998959	0.739448	0.712513		-0.1455	-0.0345806	0.622986	0.0736481	0.0530552	0.154811
-1.84	-0.228755	0.00484141	-0.0301075	0.188002	0.0650424	0.0831278			2.19504	2.20254	1.35016	0.992321	0.735904	0.712625		-0.145734	-0.034707	0.61863	0.071997	0.0534228	0.15207
-1.839	-0.226733	0.00408318	-0.0307564	0.185765	0.0646656	0.0834911			2.21268	2.20869	1.34868	0.982622	0.734363	0.716233		-0.144621	-0.0342797	0.617631	0.0744999	0.0541105	0.153226
-1.838	-0.225492	0.00421042	-0.0310898	0.183803	0.0646515	0.0840769			2.22745	2.21682	1.34655	0.977282	0.722036	0.714387		-0.14509	-0.0334826	0.618428	0.0731175	0.0551904	0.158242
-1.837	-0.225254	0.00323764	-0.0308575	0.183267	0.0643313	0.0840118			2.24014	2.22837	1.33649	0.970426	0.710286	0.706752		-0.147783	-0.0335719	0.618815	0.0720366	0.0546826	0.157262
-1.836	-0.225067	0.00347183	-0.031839	0.182163	0.0645259	0.0844102			2.25274	2.23285	1.32889	0.962003	0.700627	0.700277		-0.145382	-0.0335686	0.613617	0.0721187	0.0547627	0.156548
-1.835	-0.222722	0.00244358	-0.0314493	0.179643	0.0642725	0.0835307			2.26664	2.24449	1.33269	0.958235	0.682289	0.694122		-0.142162	-0.033773	0.611194	0.0727045	0.0543986	0.156383
-1.834	-0.21934	0.00185285	-0.031142	0.177897	0.064084	0.0845096			2.27698	2.24587	1.34351	0.95364	0.682508	0.688928		-0.137888	-0.0330648	0.605881	0.0697256	0.0547156	0.157416
-1.833	-0.21691	0.00126484	-0.0321544	0.177913	0.0634547	0.0852437			2.28914	2.25302	1.33723	0.944892	0.674376	0.680008		-0.137536	-0.0328364	0.604331	0.0708992	0.0548735	0.158106
-1.832	-0.216978	0.000902928	-0.0320467	0.176141	0.0629333	0.0845428			2.30192	2.2615	1.33362	0.936791	0.668844	0.674846		-0.135428	-0.0324919	0.60659	0.0731456	0.0547025	0.16078
[truncated: 3,832 more rows]

## Sheet: +0.4mm
B		baseline						C		0-2min							18-20min
[truncated: 4,003 more rows]

## Sheet: +0.6mm
B		baseline						C		0-2min							18-20min
[truncated: 4,003 more rows]

[truncated: 1 more sheets: +0.8mm]
