# Supplementary material for: Mapping responses to focal injections of bicuculline in the lateral parafacial region identifies core regions for maximal generation of active expiration
Source: eLife. 2024 Jul 17;13:RP94276. doi: 10.7554/eLife.94276 (PMC11254382; doi:10.7554/eLife.94276)
Supplement: Figure 3—source data 2. [file elife-94276-fig3-data2.xlsx]

## Sheet: Figure 3_D
Distance from cVII (mm)	ABD/DIA
-0.2 mm	0.1231
	0
	0.35849
	0.5969
	0.99371
+0.1 mm	0.56381
	0.99263
	0.98693
	0.87611
	0.98639
	0.53986
	0.86047
+0.4 mm	1
	1
	0.9563
	0.96959
	0.86577
+0.6 mm	0.98664
	0.93131
	0.92067
	0.90207
	0.61772
	1
+0.8 mm	1
	0.97849
	0.991
	0.91712
	0.9521

## Sheet: Figure 3_E
Distance from cVII (mm)	ABD duration (min)
-0.2 mm	0.1
	0
	0.35849
	0.5969
	0.99371
+0.1 mm	0.56381
	0.99263
	0.98693
	0.87611
	0.98639
	0.53986
	0.86047
+0.4 mm	1
	1
	0.9563
	0.96959
	0.86577
+0.6 mm	0.98664
	0.93131
	0.92067
	0.90207
	0.61772
	1
+0.8 mm	1
	0.97849
	0.991
	0.91712
	0.9521

## Sheet: Figure3_F
Distance from cVII (mm)	ABD delay (sec)
-0.2 mm	10
	-5
	14.9
	51
	-185
+0.1 mm	33
	53.4
	17.43
	156
	-31.5
	184
	89
+0.4 mm	25.65
	169
	-82
	-1.26
	-34.2
+0.6 mm	-176
	57
	-105
	-157
	-117
	-143
+0.8 mm	5.6
	214
	15.8
	20
	0.95
