# Supplementary material for: Mapping responses to focal injections of bicuculline in the lateral parafacial region identifies core regions for maximal generation of active expiration
Source: eLife. 2024 Jul 17;13:RP94276. doi: 10.7554/eLife.94276 (PMC11254382; doi:10.7554/eLife.94276)
Supplement: Figure 4—source data 1. [file elife-94276-fig4-data1.xlsx]

## Sheet: Figure 4_B
Time (min)	Late-Expiratory Peak Amplitude (V)
	-0.2 mm	SEM	+0.1 mm	SEM	+0.4 mm	SEM	+0.6 m	SEM	+0.9 mm	SEM
0	0	0	0	0	0	0	0	0	0	0
2	-0.01387	0.0044	-0.0164	0.00484	-0.02239	0.00569	-0.02726	0.00686	-0.00747	0.00747
4	-0.0144	0.00426	-0.02095	0.00717	-0.02255	0.0044	-0.03279	0.00659	-0.01346	0.00974
6	-0.0103	0.004	-0.01497	0.00488	-0.01713	0.00299	-0.03162	0.00602	-0.02423	0.01399
8	-0.0086	0.00393	-0.01131	0.00415	-0.01323	0.00191	-0.02893	0.00623	-0.02657	0.01146
10	-0.00478	0.00138	-0.01195	0.00508	-0.00754	0.00265	-0.02493	0.00736	-0.02542	0.00965
12	-0.00319	0.00265	-0.00526	0.00228	-0.00558	0.00247	-0.01902	0.00786	-0.02371	0.00892
14	-0.00034375	0.00034375	-0.00291	0.00177	-0.00478	0.00211	-0.0169	0.00762	-0.01535	0.00932
16	-0.00036875	0.00036875	-0.00231	0.00141	-0.00885	0.00414	-0.01436	0.00618	-0.01416	0.00881
18	-0.00050575	0.00050575	-0.00107	0.000709259	-0.00903	0.00474	-0.01304	0.00544	-0.01119	0.00758
20	0	0	-0.000854826	0.000600876	-0.0081	0.00498	-0.01206	0.00474	-0.01058	0.00622

## Sheet: Figure 4_C
Distance from cVII (mm)	Max Exp Peak Amp (V)
-0.2 mm	-0.02452
	-0.00519
	-0.01783
	-0.01007
	-0.01903
+0.1 mm	-0.04794
	-0.02298
	-0.01137
	-0.00646
	-0.04663
	-0.02527
	0
+0.4 mm	-0.01757
	-0.01783
	-0.02474
	-0.03872
	-0.01391
+0.6 mm	-0.03122
	-0.04112
	-0.0287
	-0.03007
	-0.01525
	-0.06536
+0.8 mm	0
	-0.04135
	-0.04952
	-0.01543
	-0.03024

## Sheet: Figure 4_D
Time (min)	Late-Expiratory Peak Area (V.s)
	-0.2 mm	SEM	+0.1 mm	SEM	+0.4 mm	SEM	+0.6 m	SEM	+0.9 mm	SEM
0	0	0	0	0	0	0	0	0	0	0
2	-0.00143	0.000670392	-0.00241	0.000910572	-0.00375	0.00114	-0.00452	0.001	-0.00118	0.00118
4	-0.00142	0.000545816	-0.00348	0.00146	-0.00365	0.0011	-0.00543	0.000885364	-0.00209	0.00143
6	-0.000697182	0.000290206	-0.0024	0.00107	-0.00261	0.000887882	-0.00557	0.000857828	-0.00408	0.00239
8	-0.000809969	0.000559524	-0.00175	0.000838321	-0.0017	0.000542995	-0.00522	0.000933836	-0.00467	0.00191
10	-0.00014195	7.93309e-05	-0.00174	0.000960427	-0.000958585	0.000401178	-0.00426	0.00112	-0.00405	0.00162
12	-0.000108954	0.00010815	-0.0004951	0.000276145	-0.000562926	0.000294705	-0.00323	0.0012	-0.00371	0.00154
14	-2.49175e-07	2.49175e-07	-0.0004951	0.000276145	-0.000468986	0.000200462	-0.00284	0.00116	-0.0029	0.00174
16	-7.66195e-07	7.66195e-07	-0.000234815	0.000218475	-0.000509134	0.000306393	-0.00236	0.000921551	-0.00272	0.00164
18	-1.25653e-06	1.25653e-06	-7.42685e-05	6.10093e-05	-0.000717518	0.000375192	-0.00194	0.000752162	-0.00243	0.00179
20	0	0	-1.4006e-05	1.12777e-05	-0.000557989	0.000431245	-0.00175	0.000696698	-0.00173	0.00105

## Sheet: Figure 4_E
Distance from cVII (mm)	Max Exp Peak Area (V.s)
-0.2 mm	-0.00161
	-1.86729e-05
	-0.00319
	0
	-0.000900659
+0.1 mm	-0.00868
	-0.0023
	-0.00163
	-0.000429675
	-0.00928
	-0.00202
	0
+0.4 mm	-0.00332
	-0.00319
	-0.00376
	-0.00778
	-0.000702536
+0.6 mm	-0.00437
	-0.00769
	-0.00534
	-0.00616
	-0.00219
	-0.00765
+0.8 mm	0
	-0.00781
	-0.0078
	-0.00308
	-0.00601

## Sheet: Figure 4_F
Time (min)	Relative Respiratory Rate
	-0.2 mm	SEM	+0.1 mm	SEM	+0.4 mm	SEM	+0.6 m	SEM	+0.9 mm	SEM
0	1	0	1	0	1	0	1	0	1	0
2	0.83668	0.02377	0.87158	0.04316	0.95414	0.02018	0.97635	0.02284	0.91858	0.03785
4	0.83669	0.05403	0.83362	0.04591	0.91716	0.02704	0.89935	0.02481	0.87714	0.05235
6	0.85975	0.0518	0.85347	0.04752	0.94985	0.03819	0.89671	0.02386	0.86904	0.06512
8	0.8991	0.05063	0.88713	0.04571	0.98713	0.03979	0.95544	0.01995	0.88629	0.06498
10	0.92207	0.0398	0.91714	0.04237	1.00183	0.04876	0.98398	0.02637	0.9153	0.07341
12	0.94513	0.03165	0.94026	0.03556	1.02648	0.03487	0.99382	0.02721	0.93448	0.07574
14	0.96597	0.03091	0.97492	0.02605	1.03793	0.02407	0.99969	0.02271	0.9371	0.07467
16	0.9738	0.02505	0.99262	0.02243	1.05565	0.02145	1.01943	0.02143	0.95035	0.0754
18	0.9841	0.02225	1.00398	0.02461	1.03956	0.0154	1.02759	0.02852	0.96556	0.07276
20	0.98934	0.01735	1.01331	0.02501	1.04947	0.0207	1.05915	0.0285	0.97514	0.06636

## Sheet: Figure 4_G
Distance from cVII (mm)	Relative RR max
-0.2 mm	0.86744
	0.88674
	0.80174
	0.79078
	0.84238
+0.1 mm	0.97839
	0.77911
	0.73346
	0.88538
	0.6838
	0.99622
	0.77899
+0.4 mm	0.93741
	0.93039
	0.90874
	0.96916
	1.02498
+0.6 mm	0.92161
	0.86794
	0.97697
	0.92246
	0.80498
	0.88631
+0.8 mm	1.05343
	0.81675
	0.75086
	0.85512
	0.97267

## Sheet: Figure 4_H
Time (min)	Relative Tidal Volume
	-0.2 mm	SEM	+0.1 mm	SEM	+0.4 mm	SEM	+0.6 m	SEM	+0.9 mm	SEM
0	1	0	1	0	1	0	1	0	1	0
2	1.06088	0.04744	1.13061	0.02897	1.12346	0.0517	1.22976	0.03867	1.2252	0.07592
4	1.08291	0.0561	1.16145	0.03507	1.13855	0.05468	1.28922	0.03471	1.28654	0.08805
6	1.07562	0.05223	1.14923	0.03192	1.10723	0.05139	1.27933	0.03475	1.27128	0.06816
8	1.06476	0.04579	1.13357	0.02876	1.08854	0.04983	1.25348	0.03285	1.23926	0.04494
10	1.06009	0.03709	1.11862	0.02617	1.07542	0.0424	1.22599	0.03132	1.22444	0.04629
12	1.05654	0.03256	1.10059	0.02164	1.05003	0.04309	1.20936	0.03246	1.20896	0.05179
14	1.04923	0.0278	1.07694	0.01629	1.05036	0.02546	1.18333	0.03506	1.19703	0.05452
16	1.04633	0.02458	1.0606	0.01434	1.04923	0.01234	1.15221	0.03317	1.18705	0.05733
18	1.04022	0.0198	1.04708	0.01306	1.04526	0.00817	1.12807	0.02731	1.1423	0.04216
20	1.02905	0.0176	1.04331	0.01078	1.0411	0.00513	1.10834	0.02216	1.12123	0.039

## Sheet: Figure 4_I
Distance from cVII (mm)	Relative VT max
-0.2 mm	0.93689
	1.13083
	1.17633
	1.05841
	1.01362
+0.1 mm	1.10585
	1.06856
	1.12995
	1.09886
	1.19387
	1.12088
	1.13688
+0.4 mm	1.21116
	1.17814
	0.9173
	1.09464
	1.11483
+0.6 mm	1.2936
	1.34952
	1.20072
	1.18804
	1.19885
	1.55009
+0.8 mm	1.17545
	1.43995
	1.32281
	1.14693
	1.25386

## Sheet: Figure 4_J
Time (min)	Relative Minute Ventilation
	-0.2 mm	SEM	+0.1 mm	SEM	+0.4 mm	SEM	+0.6 m	SEM	+0.9 mm	SEM
0	1	0	1	0	1	0	1	0	1	0
2	0.88628	0.0377	0.96037	0.03777	1.06504	0.0555	1.15959	0.02932	1.12379	0.07649
4	0.89823	0.02664	0.94333	0.04408	1.0363	0.05568	1.11347	0.03764	1.12334	0.07946
6	0.91725	0.01786	0.95583	0.04643	1.0423	0.05767	1.10416	0.04304	1.09709	0.06486
8	0.95089	0.01955	0.98025	0.04333	1.0633	0.04987	1.14526	0.02075	1.09215	0.05877
10	0.97362	0.02096	1.00044	0.03729	1.06425	0.04302	1.1521	0.01798	1.11272	0.06208
12	0.99615	0.02234	1.0101	0.02785	1.06631	0.03638	1.14867	0.02513	1.11972	0.05592
14	1.01195	0.02768	1.02671	0.02115	1.08076	0.02029	1.13347	0.03407	1.11137	0.053
16	1.01799	0.02571	1.02992	0.01802	1.09915	0.0177	1.12744	0.03933	1.11725	0.05198
18	1.02318	0.02403	1.02861	0.02148	1.07866	0.01299	1.11235	0.03357	1.09503	0.05264
20	1.01774	0.01985	1.03444	0.02081	1.08459	0.01766	1.12488	0.02667	1.08729	0.05166

## Sheet: Figure 4_K
Distance from cVII (mm)	Relative VE max
-0.2 mm	0.95039
	0.91053
	0.93819
	0.86987
	0.90324
+0.1 mm	1.06774
	0.86586
	1.01171
	0.99172
	0.82083
	0.94875
	0.95167
+0.4 mm	0.921
	0.97887
	1.0891
	0.85478
	1.06901
+0.6 mm	1.14603
	1.1713
	1.17307
	1.09592
	1.1708
	1.1925
+0.8 mm	1.23826
	1.17608
	0.99325
	0.98076
	1.2

[truncated: 4 more sheets: Figure 4_L, Figure 4_M, Figure 4_N, Figure 4_O]
