# Supplementary material for: Mapping responses to focal injections of bicuculline in the lateral parafacial region identifies core regions for maximal generation of active expiration
Source: eLife. 2024 Jul 17;13:RP94276. doi: 10.7554/eLife.94276 (PMC11254382; doi:10.7554/eLife.94276)
Supplement: Figure 5—source data 1. [file elife-94276-fig5-data1.xlsx]

## Sheet: Airflow
	Rows: time bins, Columns: Groups
			LATE-E							INSP							POST-I
	Means							Means							Means
Group:	+0.6mm	-0.2mm	+0.4mm	+0.8mm	+0.1mm	CTRL	Group:	+0.6mm	-0.2mm	+0.4mm	+0.8mm	+0.1mm	CTRL	Group:	+0.6mm	-0.2mm	+0.4mm	+0.8mm	+0.1mm	CTRL
	-86.6325	-22.7468	-49.7702	-37.0644	-47.178	-2.17005		104.058	35.0371	48.5597	67.2235	57.8407	20.962		-61.6165	-29.569	-16.1959	-61.9165	-29.6731	-23.5735
	-99.3313	-20.6903	-55.0532	-53.61	-59.4473	0.876089		120.701	43.414	60.5505	86.9472	72.7122	20.9904		-73.2497	-41.6646	-29.6048	-71.0968	-41.0632	-21.5827
	-102.471	-6.95558	-42.2518	-62.3045	-45.1389	-0.386235		118.77	35.5402	40.7564	88.4525	64.1183	18.4355		-75.3641	-44.9152	-21.4216	-61.1702	-43.5844	-17.985
	-96.5172	-2.39461	-18.7498	-54.042	-35.8901	-0.0317552		102.683	27.7387	19.9627	75.4866	55.6528	15.3685		-64.7301	-39.137	-17.4623	-49.9757	-43.6429	-13.9701
	-82.3639	-0.327716	-7.43624	-46.4078	-25.9315	-1.13882		89.1706	23.0283	8.76754	62.7269	47.6338	14.6149		-60.6094	-36.0088	-17.8587	-41.002	-43.8471	-15.8137
	-64.353	-0.0421813	-0.381966	-43.5634	-13.6145	-0.553653		77.0779	19.4677	-1.36756	56.9323	39.2097	12.2629		-59.148	-32.9873	-14.1072	-36.7327	-44.6095	-13.2214
	-55.0741	0.312218	4.25252	-40.4696	-7.56809	-0.827393		61.9126	17.6014	-13.1041	45.4232	30.4418	11.0011		-46.7443	-29.6168	-4.01967	-28.0447	-40.1073	-11.6418
	-44.7555	0.794072	-0.714477	-35.9603	-2.53302	-0.88822		45.8329	15.7769	-3.41069	37.7328	24.6623	9.87251		-38.2814	-26.6821	-11.2678	-21.2239	-34.5486	-9.63326
	-30.7127	1.54914	-2.52909	-25.8559	-2.3006	-1.06956		33.709	13.586	5.16336	25.8081	19.3208	8.62743		-36.5893	-22.8382	-14.201	-16.6231	-28.7327	-7.18812
	-25.9253	1.63508	-7.66103	-20.1722	-2.28051	-0.691078		27.3139	10.3789	5.24157	19.881	15.7014	6.12198		-35.7571	-17.4918	-11.8088	-13.6061	-24.7979	-5.81083
	Error (Symmetric)							Error (Symmetric)							Error (Symmetric)
	22.9776	16.4824	22.2136	15.5113	21.1137	2.52415		17.5332	18.6693	14.2992	17.5441	17.7393	7.67744		14.0767	10.9812	20.8639	17.5859	12.1241	11.1103
	22.4135	13.2152	28.0392	22.2149	24.3371	1.81637		17.8019	18.057	27.0116	24.7337	21.6226	8.56443		20.8334	14.1072	24.0484	20.585	12.5522	13.0728
	21.5295	6.41027	22.3884	22.5432	23.6373	1.9628		18.1295	13.3599	27.0064	23.3354	20.7675	8.24827		26.2135	13.8341	15.5591	16.615	11.4081	11.2426
	19.6553	3.90277	19.2176	20.0136	18.7509	1.46698		15.5094	10.1199	28.6909	16.5358	18.1273	7.4192		19.5435	11.1294	16.8662	9.17354	9.50282	9.61266
	17.4784	3.31508	14.0418	20.848	11.4337	1.81057		13.8871	7.05014	27.2664	17.3744	13.2179	6.9606		16.4954	9.3228	15.7941	7.3691	10.178	11.438
	12.4427	2.7357	11.9417	21.6579	5.94079	1.60081		13.3802	6.92381	23.8585	18.3816	10.1532	6.39134		14.8871	9.24549	13.18	7.13065	10.0495	10.5158
	14.0761	2.3697	10.0265	22.4419	4.59841	1.41797		15.7088	6.35536	27.4246	21.3764	6.77213	5.82015		18.2647	9.43925	17.8142	6.91248	8.6444	9.64342
	12.5244	2.06057	5.28914	19.1039	1.71782	1.59699		14.6144	7.52996	14.6981	22.9556	6.1966	6.3425		13.1664	10.1307	8.63434	9.58545	7.95098	10.8246
	8.42946	1.66542	2.08537	14.2195	1.80841	1.5938		13.368	3.86718	6.28958	21.3836	5.07279	5.79632		8.78073	6.38242	7.57882	11.5682	6.49022	10.3401
	6.97837	1.47541	6.59764	11.1817	2.33822	1.18469		11.9457	3.6581	7.09735	20.9139	4.47073	5.02668		8.11788	6.91446	8.4529	12.3091	5.39177	9.90028

## Sheet: DIA_EMG
	Rows: time bins, Columns: Groups
			LATE-E							INSP							POST-I
	Means							Means							Means
Group:	+0.6mm	-0.2mm	+0.4mm	+0.8mm	+0.1mm	CTRL	Group:	+0.6mm	-0.2mm	+0.4mm	+0.8mm	+0.1mm	CTRL	Group:	+0.6mm	-0.2mm	+0.4mm	+0.8mm	+0.1mm	CTRL
	30.198	13.8679	14.479	9.02852	32.9464	1.6453		60.7637	-24.4086	52.4352	9.85176	17.2293	19.0051		21.7496	16.8384	16.5642	14.8049	29.1593	2.52037
	33.7987	8.24655	16.0665	14.1006	46.5871	6.85308		70.2903	-4.19966	75.1038	2.42116	33.5979	20.4272		10.6771	35.6918	27.6115	7.73261	53.7767	16.8883
	32.9678	4.81581	10.649	15.2981	26.6723	6.81638		64.3084	-4.82982	37.5223	-14.0943	28.2727	18.1868		4.54832	33.5497	24.3697	2.71891	50.6404	13.4569
	29.549	2.90364	8.28337	12.5579	25.3772	4.53035		37.9427	-10.4088	17.511	-40.1456	13.9823	21.6746		-2.68274	24.6949	30.962	-3.94932	51.7878	9.20147
	28.1388	0.953523	6.82626	9.92593	17.4911	3.16689		33.3448	-10.9949	-7.31156	-53.5438	12.9213	18.984		-2.017	22.4212	17.4084	-6.05376	48.8731	5.78243
	21.1281	-0.656796	5.31882	8.56156	12.5951	-0.743577		26.2539	-11.2718	-7.49242	-52.5627	16.1517	5.03664		1.26323	14.1594	25.4606	-4.21682	41.7882	-1.88638
	22.4004	-1.28313	5.96463	7.62748	10.5121	-1.88141		2.74192	-8.37028	-15.4183	-62.7351	-0.90014	2.56875		2.03652	12.7578	22.8743	-5.08725	33.1585	-2.21394
	16.2929	-3.23416	2.91798	6.46541	4.0782	-3.25856		-23.3451	-4.63911	1.64506	-64.5084	-6.9034	1.14367		9.31597	8.9322	19.9183	-7.95943	25.9291	-7.37148
	9.14191	-5.11893	3.25626	4.44096	-1.08968	-3.7591		-46.4607	-14.0804	9.57569	-70.7528	-16.4999	4.76675		-2.93387	4.03877	28.4863	-10.0967	19.3968	-11.9569
	6.34435	-5.32682	4.86719	2.79524	-2.79196	-1.70503		-22.6737	-6.89653	3.79222	-71.878	-23.7899	-0.984303		-3.40109	1.25291	13.8118	-11.4144	13.5052	-9.8856
	Error (Symmetric)							Error (Symmetric)							Error (Symmetric)
	12.5192	7.86203	5.14529	4.80881	12.5878	0.68007		47.748	23.1789	19.0618	50.845	33.5422	10.6163		21.3573	7.27328	6.62151	6.36275	24.986	3.20636
	14.4006	4.85028	3.65244	7.3731	21.6305	5.94378		72.0134	30.6206	13.328	56.4348	36.2462	18.1614		19.7512	11.7973	10.2658	9.21285	27.5178	16.2426
	12.7082	1.81471	2.39025	8.30331	8.34633	5.84518		74.9465	22.1501	20.1757	48.6465	34.5199	16.1288		16.8471	7.61601	10.6784	6.74084	25.7683	9.26988
	11.4312	0.926856	4.54577	7.16094	7.67499	3.34675		49.7697	15.3595	26.135	52.2855	27.376	11.9916		10.9403	7.47146	7.61695	5.83351	23.9765	6.02152
	11.832	1.12841	4.76485	6.17612	5.67641	2.83221		51.5682	8.05922	29.1429	49.903	23.4059	11.9265		9.01953	7.8148	11.3069	4.93919	25.3469	3.27814
	10.9305	1.19421	5.31796	5.771	4.85872	0.893987		49.3462	9.58507	34.6488	43.7487	18.8067	13.0557		11.2444	4.92978	16.8098	4.20669	21.0998	5.65775
	10.3632	2.01014	6.36304	5.70771	4.99644	1.78043		34.0437	12.5758	27.5465	47.2119	14.2422	12.2278		13.8587	5.21019	14.4587	4.77586	18.8339	4.50974
	7.35229	3.04398	3.47208	4.77178	3.65756	2.51111		27.4586	13.2548	20.3948	44.7823	8.88527	15.7736		16.6926	4.78658	7.99464	5.26637	17.8752	7.34773
	5.10797	4.74257	4.62817	3.29875	2.73349	2.9936		27.901	9.14739	22.5823	41.1453	13.5732	15.2401		16.761	6.60631	20.5657	5.60139	17.3802	10.3018
	2.30073	4.64163	6.43714	2.38462	2.7134	1.00347		28.2572	7.14132	18.3978	35.8436	18.5833	17.4907		11.1255	9.05499	9.7585	4.11791	15.6945	7.01565

## Sheet: ABD_EMG
	Rows: time bins, Columns: Groups
			LATE-E							INSP							POST-I
	Means							Means							Means
Group:	+0.6mm	-0.2mm	+0.4mm	+0.8mm	+0.1mm	CTRL	Group:	+0.6mm	-0.2mm	+0.4mm	+0.8mm	+0.1mm	CTRL	Group:	+0.6mm	-0.2mm	+0.4mm	+0.8mm	+0.1mm	CTRL
	620.19	500.414	638.693	503.479	788.741	-6.04054		130.441	113.436	142.709	123.637	227.228	8.72524		437.257	-19.1321	273.84	589.559	320.414	15.0862
	822.844	365.349	679.497	780.082	839.587	1.21229		187.855	70.5286	161.362	186.973	238.217	-3.03689		665.898	36.9267	374.455	892.747	368.923	4.15359
	983.398	118.977	484.601	868.872	575.777	2.24076		254.79	28.9912	132.564	176.836	190.053	3.39056		870.947	-6.02684	274.58	915.269	288.343	-0.453992
	1034.4	34.2139	440.333	831.438	610.365	11.3405		253.799	3.78758	124.621	174.031	178.89	3.26757		765.741	20.2605	289.426	868.982	368.119	9.52902
	854.116	19.2803	422.06	685.313	567.177	12.5529		199.064	0.728324	143.193	143.103	181.664	33.083		644.294	25.3	333.119	705.793	438.14	21.232
	697.392	0.125305	244.307	684.71	392.442	12.1938		151.101	-1.55981	84.6035	137.436	164.869	17.107		555.41	1.07775	279.16	656.498	421.567	27.7415
	541.814	-2.7936	209.004	744.511	319.221	43.745		118.421	-11.8909	59.2082	146.35	132.452	29.5611		354.981	-11.6047	239.24	654.547	389.007	41.454
	438.161	-9.436	82.049	778.108	223.401	14.3644		97.8377	-11.2349	59.6304	152.663	112.085	38.2679		257.533	-21.4955	214.747	675.467	334.866	24.4038
	282.942	7.54826	110.332	611.532	139.789	23.9025		66.6673	3.59841	63.7134	107.058	89.1704	29.7015		191.926	-20.8589	197.508	478.55	218.391	30.7335
	204.696	-10.427	247.572	496.679	130.242	25.1169		44.4474	-12.5936	71.2782	75.6814	94.8499	29.2111		125.398	-28.724	280.538	371.255	203.618	22.7775
	Error (Symmetric)							Error (Symmetric)							Error (Symmetric)
	209.918	333.913	207.356	138.637	192.197	13.5293		47.09	87.5009	31.6633	23.5001	55.9366	15.4688		187.761	25.2999	117.211	197.994	175.93	26.9059
	212.76	174.085	242.164	232.754	243.538	8.52764		42.5459	53.271	65.875	38.9095	71.839	6.07921		188.949	34.158	318.803	283.516	194.085	12.5986
	197.995	74.8648	240.609	228.612	240.31	12.3963		63.2804	22.2135	57.6739	47.0403	74.3061	14.1982		313.034	21.919	214.202	270.408	181.482	34.5886
	142.801	42.2007	147.79	76.6266	163.206	15.838		53.488	9.97809	60.5352	29.6217	59.9444	10.1633		249.695	34.5627	247.466	189.539	187.699	43.1082
	69.8864	14.5734	135.157	144.71	126.306	19.8927		17.2666	13.6886	67.178	34.3324	60.2561	15.3686		217.419	18.1865	225.777	190.489	221.079	40.2563
	79.0752	14.8278	116.112	181.308	76.7745	22.0402		15.4485	9.60391	49.4773	36.5482	73.0502	22.7282		185.294	8.88856	211.285	174.05	219.786	48.958
	99.0175	9.85355	134.604	194.032	101.515	22.4366		18.7026	5.0231	43.5314	32.2058	82.9458	23.7112		140.202	15.8389	173.823	172.119	219.754	38.5565
	93.1964	12.0504	69.8493	272.385	101.158	11.6261		19.0348	2.57813	44.31	59.0031	95.8355	16.1957		120.4	7.16422	158.329	146.954	186.992	25.5202
	61.4261	8.23053	91.4441	295.598	83.1425	13.3131		17.0076	5.18688	40.5378	64.2935	90.5263	18.0191		100.054	11.5337	149.404	140.389	160.869	21.9179
	47.8904	13.0707	206.949	297.602	82.7115	10.3652		10.7612	10.8462	37.1337	66.2196	96.4898	15.567		72.0695	16.2373	184.457	139.103	153.774	23.691
