# Supplementary material for: Mapping responses to focal injections of bicuculline in the lateral parafacial region identifies core regions for maximal generation of active expiration
Source: eLife. 2024 Jul 17;13:RP94276. doi: 10.7554/eLife.94276 (PMC11254382; doi:10.7554/eLife.94276)
Supplement: Figure 6—source data 1. [file elife-94276-fig6-data1.xlsx]

## Sheet: -0.2mm
	Mean-Cycles
	Baseline		Time Bin Post-Injection:			2min					4min					6min					8min					10min					12min					14min					16min					18min
ABD EMG (STD)	Airflow (STD)	DIA EMG (STD)			ABD EMG (STD)	Airflow (STD)	DIA EMG (STD)			ABD EMG (STD)	Airflow (STD)	DIA EMG (STD)			ABD EMG (STD)	Airflow (STD)	DIA EMG (STD)			ABD EMG (STD)	Airflow (STD)	DIA EMG (STD)			ABD EMG (STD)	Airflow (STD)	DIA EMG (STD)			ABD EMG (STD)	Airflow (STD)	DIA EMG (STD)			ABD EMG (STD)	Airflow (STD)	DIA EMG (STD)			ABD EMG (STD)	Airflow (STD)	DIA EMG (STD)			ABD EMG (STD)	Airflow (STD)	DIA EMG (STD)
-0.0346413	-0.058049	0.0095994			1.92472	-0.169366	0.0406907			1.45107	-0.163666	0.0404586			0.940116	-0.00235447	0.0638807			0.449839	-0.0121661	0.0253371			0.120722	0.0339834	0.0416216			-0.0277224	-0.0176466	0.0107291			-0.0303831	-0.0428749	0.00825341			-0.145618	-0.0287586	0.0939897			-0.000287246	-0.0650516	0.00890338
-0.0236896	-0.0553573	0.00913843			1.97978	-0.17208	0.0414273			1.4697	-0.171085	0.0407959			0.934055	-0.000545036	0.0644896			0.440339	-0.0140988	0.0252627			0.150402	0.0358616	0.0430329			-0.0175488	-0.0169471	0.0098422			-0.0186267	-0.0388831	0.00851159			-0.151783	-0.0343598	0.0933685			-0.0104182	-0.0610105	0.00813342
-0.0155446	-0.055226	0.0084512			2.03686	-0.174613	0.0426952			1.4959	-0.171718	0.0406598			0.93332	-0.00199259	0.0640285			0.417312	-0.0121661	0.0254585			0.131331	0.0321905	0.0438123			-0.0366846	-0.0140718	0.00924898			-0.0538288	-0.0386613	0.00880463			-0.149947	-0.0329019	0.092911			-0.0233796	-0.0617321	0.00792911
-0.0283622	-0.0554667	0.00773047			2.02211	-0.177689	0.0428445			1.54023	-0.173347	0.0415416			0.94572	-0.00669713	0.0645844			0.402893	-0.0115512	0.0255328			0.11359	0.03663	0.044592			-0.0207621	-0.017258	0.00891568			-0.0630424	-0.037996	0.00976107			-0.139425	-0.0359711	0.0923355			-0.0300212	-0.0569694	0.00801857
-0.0244734	-0.0506962	0.00739448			2.03535	-0.181851	0.0428481			1.51992	-0.174342	0.0420157			0.967309	-0.00543052	0.065762			0.40035	-0.0111998	0.0251841			0.10117	0.0382521	0.0467798			-0.0176391	-0.0157037	0.00862652			-0.0766839	-0.0343738	0.0100934			-0.146976	-0.0356642	0.0929073			-0.047235	-0.0555261	0.00797909
-0.0180556	-0.0485298	0.00679009			2.06248	-0.184656	0.0439096			1.5468	-0.177689	0.0428476			1.00832	-0.00316872	0.0659618			0.384942	-0.00909136	0.0250809			0.0916007	0.0364593	0.047914			-0.0167436	-0.0136832	0.00834482			-0.0869385	-0.0268338	0.00952788			-0.124834	-0.0345133	0.0936457			-0.0359047	-0.0564643	0.00774074
-0.00820633	-0.0500616	0.00623912			2.06263	-0.183479	0.043572			1.55984	-0.179137	0.0430641			1.055	-0.00633524	0.0667952			0.409538	-0.00759792	0.0255475			0.076685	0.0354348	0.0479625			-0.0220937	-0.0101084	0.00780334			-0.101671	-0.0321562	0.00969371			-0.104408	-0.0348969	0.0941166			-0.0261932	-0.0561034	0.00734996
0.012465	-0.0513746	0.00566434			2.08864	-0.188365	0.0435621			1.56562	-0.183208	0.0427099			1.04643	-0.00669713	0.0666291			0.401214	-0.00900352	0.0255618			0.0892786	0.037313	0.0480294			-0.0393823	-0.0121289	0.00767513			-0.114202	-0.035187	0.00966473			-0.115407	-0.0378893	0.0936837			-0.0325536	-0.0528561	0.00762638
0.0124848	-0.0500179	0.00510349			2.10738	-0.195331	0.0434637			1.56978	-0.182122	0.0426912			1.02901	-0.00669713	0.0657158			0.386545	-0.0106727	0.025699			0.0886731	0.0364593	0.0483403			-0.0348341	-0.0136055	0.00778643			-0.116546	-0.0334128	0.010333			-0.11828	-0.0381963	0.094023			-0.0390812	-0.0504748	0.0081123
0.0118695	-0.0506087	0.00466288			2.11346	-0.197864	0.0434647			1.61126	-0.18167	0.042222			1.01929	-0.00796374	0.0649094			0.389078	-0.0118147	0.0254542			0.0883666	0.0350933	0.0492055			-0.0262966	-0.0140718	0.00745967			-0.129081	-0.0353348	0.0100669			-0.149472	-0.0367384	0.0935993			-0.0439881	-0.0533613	0.00811079
0.0054908	-0.0512214	0.00414221			2.14687	-0.19705	0.0438378			1.60906	-0.183117	0.0415803			1.00461	-0.0116731	0.0638873			0.37516	-0.0111119	0.0246468			0.0935287	0.0361178	0.0499182			-0.0316608	-0.0158592	0.00674462			-0.113828	-0.0365915	0.0103873			-0.155065	-0.0358944	0.0934681			-0.0166237	-0.0557426	0.00855474
0.0188202	-0.0492738	0.00358913			2.15084	-0.200488	0.0431781			1.6167	-0.184475	0.0411825			1.02847	-0.00850657	0.0631427			0.420496	-0.0107605	0.0237683			0.102124	0.0356909	0.0497485			-0.0333768	-0.0134501	0.00635509			-0.0839374	-0.036074	0.0107569			-0.143955	-0.0387334	0.0944969			-0.0126947	-0.0553818	0.00888251
0.0282674	-0.0495583	0.00313134			2.13406	-0.203383	0.0427429			1.60987	-0.186917	0.041046			1.02657	-0.00624477	0.0625487			0.456347	-0.0137474	0.0227664			0.0727235	0.032532	0.0499988			-0.0422346	-0.0130615	0.00602718			-0.0697491	-0.0375525	0.010736			-0.138287	-0.0381195	0.0937747			-0.0140493	-0.055887	0.00925774
0.028035	-0.051681	0.00247197			2.1429	-0.202659	0.0433017			1.63696	-0.188998	0.0408301			1.03356	-0.00877798	0.0627373			0.511696	-0.014538	0.021618			0.0447082	0.0333004	0.0497795			-0.0434212	-0.0130615	0.00570808			-0.0828028	-0.042801	0.0103879			-0.138781	-0.0387334	0.0934136			-0.00399345	-0.0576189	0.00920805
0.0314099	-0.0497771	0.00179995			2.16413	-0.207183	0.0438752			1.61089	-0.190808	0.0417053			1.03638	-0.00995412	0.0639448			0.527144	-0.0148894	0.0202858			0.050267	0.0362032	0.0490426			-0.0521542	-0.0168694	0.005146			-0.0804264	-0.0433184	0.00956666			-0.124533	-0.0390403	0.0937541			-0.038775	-0.054588	0.00960281
0.0132279	-0.0460132	0.0013077			2.18255	-0.211254	0.0436367			1.62367	-0.191531	0.0419084			1.05228	-0.00787327	0.064328			0.51361	-0.0173492	0.0189576			0.0279225	0.0356055	0.048517			-0.0479116	-0.0169471	0.00485979			-0.106596	-0.0391788	0.00974715			-0.0944189	-0.0379661	0.0932692			-0.0575429	-0.0569694	0.0102867
0.0150873	-0.0436061	0.000689034			2.16052	-0.207364	0.043927			1.62711	-0.19316	0.0412796			1.0605	-0.00805421	0.0645136			0.522362	-0.0146259	0.0181721			0.020137	0.0351786	0.0487935			-0.0658744	-0.0118181	0.00466705			-0.0933253	-0.0393266	0.00966389			-0.101547	-0.0371221	0.0924272			-0.044237	-0.0568251	0.010094
0.022321	-0.0455975	0.000162851			2.14416	-0.207364	0.0443645			1.62024	-0.199221	0.040852			1.08337	-0.00977318	0.0635394			0.53543	-0.014538	0.0176784			0.0214105	0.0368008	0.0484356			-0.0679612	-0.0106524	0.00422502			-0.106843	-0.0404355	0.00946013			-0.100008	-0.0365082	0.0922622			-0.043968	-0.0561756	0.00966638
0.0453958	-0.0422275	-0.000490779			2.09874	-0.212702	0.044753			1.58272	-0.198136	0.0414329			1.09337	-0.0067876	0.063878			0.54661	-0.0139231	0.0177545			0.0243441	0.038679	0.0483472			-0.0986745	-0.0112741	0.00365857			-0.118363	-0.0380699	0.00920733			-0.0975059	-0.0381963	0.0920065			-0.0565742	-0.0516294	0.00957486
0.041178	-0.04063	-0.00103211			2.07613	-0.215597	0.0458544			1.59439	-0.204921	0.0416604			1.06949	-0.00823515	0.0639835			0.552553	-0.0156801	0.0169621			-0.00977377	0.0412403	0.0488626			-0.063411	-0.0116626	0.00316325			-0.115924	-0.0350391	0.00909191			-0.106167	-0.0376592	0.0917698			-0.0628035	-0.0464337	0.00992632
0.0383199	-0.0408051	-0.00144048			2.08058	-0.21623	0.0462028			1.58993	-0.204921	0.0412461			1.09626	-0.013573	0.0648069			0.570868	-0.0152408	0.0160554			0.00717286	0.0384229	0.0503546			-0.0766047	-0.010497	0.00318217			-0.131558	-0.0331172	0.00841931			-0.100707	-0.0397309	0.0913062			-0.0847834	-0.0485986	0.0095715
0.0465164	-0.0376539	-0.00165285			2.10174	-0.222111	0.0470233			1.59147	-0.205193	0.0419753			1.0739	-0.0145682	0.0644576			0.547269	-0.0123418	0.0154689			-0.00662122	0.0417525	0.0496701			-0.0607833	-0.00933126	0.00331744			-0.141951	-0.030382	0.00784593			-0.105138	-0.038273	0.0912009			-0.0840723	-0.047877	0.00889631
0.0408839	-0.0370412	-0.00207362			2.11785	-0.22582	0.0472535			1.63222	-0.207997	0.0424716			1.08208	-0.0114017	0.0659308			0.539333	-0.0108484	0.0153419			0.00219817	0.0417525	0.050082			-0.0500663	-0.00653359	0.00322001			-0.14395	-0.0248379	0.00777442			-0.0895403	-0.0385799	0.0911568			-0.0772114	-0.0461451	0.00855869
0.0388139	-0.0370631	-0.0024527			2.157	-0.226273	0.0477964			1.63184	-0.209626	0.0429672			1.09588	-0.0126683	0.0672444			0.55159	-0.010497	0.0148357			-0.012627	0.0398743	0.0503816			-0.0402121	-0.0048239	0.0026798			-0.14725	-0.0266859	0.00748487			-0.0673916	-0.0379661	0.0917092			-0.10474	-0.0433307	0.00815375
0.0361159	-0.039886	-0.00269127			2.17868	-0.229982	0.0483722			1.65031	-0.212069	0.0433636			1.08479	-0.015111	0.0671463			0.541801	-0.0113754	0.0144837			0.0133173	0.0403865	0.0502766			-0.0349903	-0.0048239	0.00246337			-0.163567	-0.0323779	0.00714366			-0.0711882	-0.0411887	0.0920717			-0.0902934	-0.043908	0.00735396
0.0332647	-0.0394264	-0.00265151			2.18642	-0.235953	0.0504658			1.6596	-0.211254	0.0442027			1.08412	-0.0173728	0.0684984			0.562874	-0.0140988	0.0146228			0.0269166	0.0416671	0.050043			-0.0584859	-0.00979753	0.00248797			-0.15962	-0.0307516	0.00688404			-0.0808315	-0.0396541	0.0908355			-0.0868657	-0.0402278	0.00634997
0.0329701	-0.0373038	-0.00250685			2.1797	-0.238305	0.0514046			1.629	-0.210983	0.0450755			1.11426	-0.0157443	0.0689347			0.595831	-0.0153287	0.0145137			0.0131687	0.0405573	0.0499054			-0.0868629	-0.00933126	0.00266629			-0.152757	-0.0303081	0.00685845			-0.0840683	-0.038273	0.0911672			-0.0882228	-0.0405164	0.00617621
0.0274499	-0.0394045	-0.0025216			2.23167	-0.238667	0.051065			1.64874	-0.212792	0.046207			1.10395	-0.0210822	0.0700036			0.585718	-0.0136595	0.0154184			0.024584	0.0391913	0.0498423			-0.0778781	-0.00863184	0.00278517			-0.188248	-0.0323779	0.007118			-0.0989868	-0.037429	0.0916545			-0.0886392	-0.0462172	0.00606773
0.0213259	-0.0396671	-0.00244361			2.25558	-0.240477	0.0513017			1.65998	-0.213607	0.0468911			1.11261	-0.0196346	0.070334			0.576105	-0.013396	0.0154477			0.0309028	0.0391059	0.0499004			-0.0733823	-0.00793242	0.00352811			-0.211123	-0.0348174	0.00784863			-0.0732499	-0.0363548	0.0903573			-0.0960098	-0.0455678	0.00597417
0.0295654	-0.0385949	-0.00243394			2.28283	-0.242919	0.0512404			1.67686	-0.219035	0.0476955			1.12726	-0.0162872	0.0697949			0.560463	-0.0148894	0.0155846			0.0266506	0.0397035	0.0507992			-0.0540194	-0.00645587	0.00380751			-0.211695	-0.0357784	0.00865162			-0.0943929	-0.0385799	0.0888646			-0.0883847	-0.0422483	0.0055518
0.0313339	-0.0391638	-0.00192892			2.32426	-0.245362	0.0510871			1.66227	-0.21994	0.0488049			1.0971	-0.0186394	0.0712403			0.568408	-0.0182277	0.0157981			0.0340366	0.0394474	0.0512831			-0.0594371	-0.0101084	0.0044943			-0.237748	-0.0385135	0.008796			-0.0930083	-0.0387334	0.0885679			-0.120209	-0.0441967	0.00531085
0.0104074	-0.0385511	-0.00126408			2.361	-0.246357	0.0507085			1.68082	-0.216049	0.0491953			1.10175	-0.0228916	0.0717818			0.593724	-0.0178763	0.0158012			0.0569238	0.0372276	0.0506239			-0.0411095	-0.0101084	0.00519708			-0.222911	-0.0394005	0.00926597			-0.108863	-0.0385799	0.0876947			-0.122137	-0.0460007	0.00479566
0.00725914	-0.0353343	-0.000811988			2.37682	-0.250067	0.050638			1.68417	-0.22003	0.0497857			1.10789	-0.0210822	0.0727327			0.644217	-0.0190184	0.0167707			0.0781423	0.040728	0.0501227			-0.035744	-0.0115072	0.00544155			-0.231728	-0.0368872	0.00965644			-0.0824801	-0.03459	0.08678			-0.114865	-0.0466502	0.00428965
-0.00401151	-0.0334961	-0.000647537			2.37507	-0.247624	0.0504196			1.68168	-0.224101	0.0497878			1.11349	-0.0171919	0.0745919			0.666942	-0.0172614	0.0178546			0.0554516	0.0402158	0.0494722			-0.0498119	-0.00777699	0.00547304			-0.208827	-0.0325258	0.0100085			-0.10436	-0.0351271	0.0855038			-0.120001	-0.0433307	0.00363933
-0.0118177	-0.0341964	-9.35926e-05			2.38222	-0.249343	0.0503798			1.66016	-0.227539	0.0491728			1.10419	-0.0202679	0.0753126			0.696582	-0.0156801	0.018553			0.0486357	0.0410695	0.0493394			-0.0702715	-0.00466847	0.00595027			-0.193655	-0.0350391	0.0106046			-0.0976125	-0.0342063	0.0836046			-0.101546	-0.0431143	0.00270546
-0.0189294	-0.0349623	0.000737555			2.3689	-0.251876	0.0501717			1.65364	-0.228987	0.048857			1.09895	-0.0208108	0.0758971			0.691215	-0.0141866	0.0194153			0.0564773	0.042777	0.0488395			-0.0469675	-0.00342506	0.00644868			-0.154445	-0.032304	0.0107096			-0.079751	-0.0345133	0.0823351			-0.101551	-0.0397226	0.0018499
-0.0242718	-0.0308264	0.00149696			2.37853	-0.25649	0.0501545			1.67648	-0.230615	0.048523			1.11863	-0.0212631	0.0772542			0.675118	-0.0168221	0.0197772			0.0496487	0.0442284	0.0480182			-0.0527382	-0.00536789	0.00720677			-0.167582	-0.0297907	0.0101167			-0.0807747	-0.0357409	0.0813698			-0.0955811	-0.0327229	0.00156785
-0.0302015	-0.0294258	0.00164811			2.41822	-0.257847	0.0501375			1.66413	-0.234415	0.0482618			1.10024	-0.0260581	0.0799557			0.688087	-0.0170857	0.0205251			0.0641082	0.0432039	0.0480438			-0.0549219	-0.00606731	0.00805697			-0.127246	-0.0244683	0.00994747			-0.0720284	-0.0352806	0.0812652			-0.110502	-0.0348878	0.00106958
-0.0363004	-0.0304544	0.00184948			2.46986	-0.260381	0.0498772			1.66776	-0.232968	0.0484196			1.08501	-0.0263295	0.0810014			0.697521	-0.0148894	0.0205581			0.0569662	0.0443138	0.0473719			-0.053298	-0.00497933	0.00819278			-0.145957	-0.0250596	0.00971195			-0.0593306	-0.0333623	0.0800498			-0.117971	-0.0362588	0.000310651
-0.0417072	-0.0296228	0.00186094			2.48448	-0.263909	0.0496658			1.68192	-0.237401	0.0477961			1.09051	-0.0260581	0.0837341			0.718759	-0.0117268	0.0202035			0.0902796	0.0455944	0.0465954			-0.058592	-0.00109367	0.00854502			-0.156802	-0.0215853	0.00964918			-0.0598876	-0.0344365	0.0785556			-0.10336	-0.0324343	0.00012682
-0.0298459	-0.0296666	0.00189914			2.49668	-0.265899	0.0496234			1.68417	-0.240386	0.0471688			1.09617	-0.0249725	0.0859785			0.742882	-0.012781	0.0202045			0.0831768	0.0459359	0.0460539			-0.0649478	-0.00202623	0.00920953			-0.145936	-0.0242465	0.00952417			-0.044001	-0.0338227	0.0784184			-0.118493	-0.0288983	0.000162995
-0.027937	-0.0329709	0.00202047			2.51113	-0.268614	0.0492789			1.71442	-0.237944	0.0474418			1.09627	-0.0290437	0.0878499			0.740539	-0.0144502	0.0202142			0.0673456	0.0443991	0.0453453			-0.0903263	-0.00194851	0.00970187			-0.125489	-0.0249118	0.00869971			-0.0341398	-0.0361246	0.0783386			-0.112621	-0.0304137	0.000678102
-0.0347177	-0.0323363	0.00191132			2.5176	-0.274132	0.0488976			1.73364	-0.238305	0.0472436			1.1163	-0.0331149	0.0881625			0.732826	-0.0142745	0.0200006			0.0700001	0.0430331	0.0442418			-0.0809669	-0.00560103	0.00941327			-0.115895	-0.0267598	0.00826361			-0.0367779	-0.0338994	0.0786637			-0.131025	-0.0312075	0.000651099
-0.0433191	-0.0309577	0.00174017			2.51974	-0.276937	0.0481459			1.74274	-0.239843	0.047116			1.1787	-0.0321198	0.0888859			0.734282	-0.0164707	0.0197862			0.0698527	0.0463628	0.044569			-0.0699991	-0.00785471	0.00949007			-0.108186	-0.0255771	0.007765			-0.0277923	-0.0314441	0.077832			-0.117792	-0.0304137	0.000318024
-0.0503195	-0.031833	0.00171386			2.4837	-0.27748	0.0480157			1.75343	-0.241562	0.0471708			1.20744	-0.0326626	0.0899945			0.725747	-0.0146259	0.0194845			0.0729131	0.042777	0.044921			-0.077606	-0.0054456	0.00896662			-0.124674	-0.0255771	0.00720792			-0.0471425	-0.0326718	0.0761941			-0.0906811	-0.0341661	4.86102e-05
-0.059026	-0.0339994	0.00217753			2.46063	-0.278837	0.0474548			1.77579	-0.242739	0.0474568			1.23002	-0.0332959	0.0904668			0.692802	-0.0157679	0.0191467			0.0993976	0.0414964	0.0442076			-0.0669455	-0.00567874	0.00807152			-0.121462	-0.0293471	0.0066103			-0.0594419	-0.0292957	0.0749441			-0.0753621	-0.0358259	-0.000588979
-0.0627684	-0.0342182	0.00241049			2.47606	-0.281551	0.0470065			1.80831	-0.244367	0.0477924			1.22159	-0.0320293	0.0902169			0.680134	-0.0174371	0.0194195			0.110762	0.0446553	0.0435081			-0.0607947	-0.00699987	0.00812024			-0.164724	-0.0320083	0.00584126			-0.0522703	-0.0314441	0.0735494			-0.0557377	-0.0306302	-0.00072688
-0.0580974	-0.0324457	0.00238493			2.49463	-0.284898	0.0476777			1.8032	-0.246267	0.0482975			1.23389	-0.0313055	0.0906874			0.683294	-0.0202483	0.019652			0.0990329	0.0425209	0.0446106			-0.0655314	-0.00917583	0.0077945			-0.156094	-0.030382	0.00555812			-0.0870329	-0.0322881	0.0723131			-0.0375272	-0.030991	-0.00114311
-0.0759707	-0.0334305	0.00248289			2.51087	-0.283994	0.0482449			1.82046	-0.245634	0.0478624			1.24209	-0.0348339	0.0904454			0.687314	-0.0187548	0.0193904			0.109163	0.0421794	0.0444006			-0.0698113	-0.00987525	0.00760747			-0.154321	-0.0316387	0.00545038			-0.066487	-0.028912	0.0707319			-0.0451016	-0.0364032	-0.00176589
-0.0761595	-0.0327958	0.00278825			2.5639	-0.28526	0.0492573			1.83057	-0.247714	0.0474887			1.23475	-0.0350149	0.090292			0.692634	-0.0176128	0.0188499			0.083391	0.0443138	0.0446766			-0.0806704	-0.00785471	0.00770153			-0.138312	-0.0318605	0.00540495			-0.065187	-0.0258428	0.0702612			-0.057509	-0.0346713	-0.00192952
-0.0694545	-0.0286818	0.00342151			2.60014	-0.284627	0.050739			1.88194	-0.251876	0.0473475			1.24904	-0.0317579	0.0902617			0.667522	-0.0179642	0.0193122			0.0757179	0.0469604	0.0447035			-0.0886754	-0.00731072	0.00780992			-0.143259	-0.0274991	0.00581351			-0.062528	-0.0276843	0.069163			-0.041863	-0.031857	-0.0018758
-0.0650926	-0.0293383	0.00377202			2.63021	-0.285713	0.0522393			1.95984	-0.254952	0.0470438			1.25196	-0.0321198	0.0902699			0.679461	-0.0189305	0.0192075			0.074698	0.0469604	0.0444857			-0.0831833	-0.00295878	0.00893055			-0.130857	-0.0258728	0.00505069			-0.0777796	-0.0284516	0.069272			-0.0639798	-0.0303415	-0.0019298
-0.0659769	-0.0305638	0.00385991			2.64029	-0.288698	0.0535512			1.96806	-0.256128	0.0463152			1.29082	-0.0354672	0.090929			0.677231	-0.0161193	0.018451			0.095477	0.0463628	0.0439667			-0.0953355	-0.0024925	0.00980323			-0.14353	-0.0266859	0.00499304			-0.0712315	-0.0263799	0.0688305			-0.0698708	-0.0301251	-0.00212974
-0.0731255	-0.0293602	0.00419407			2.63604	-0.292589	0.0558495			1.95695	-0.258752	0.0460794			1.26635	-0.0371862	0.0896317			0.668355	-0.0194576	0.0179198			0.112501	0.0485825	0.04312			-0.107403	-0.00536789	0.00996553			-0.15756	-0.02469	0.00524548			-0.0498995	-0.026073	0.0683787			-0.0771666	-0.0243521	-0.00229165
-0.0513676	-0.0258589	0.0050318			2.63687	-0.29856	0.0572332			1.98505	-0.26029	0.0463449			1.29415	-0.037729	0.0893136			0.654717	-0.0196333	0.0174473			0.113792	0.0508023	0.0419421			-0.141208	-0.00614502	0.0109854			-0.181951	-0.0184806	0.00477126			-0.0197301	-0.0289887	0.0684643			-0.0822163	-0.0243521	-0.0026381
-0.0669713	-0.0263403	0.00538751			2.63475	-0.296388	0.0593776			2.01033	-0.262371	0.0463747			1.28006	-0.0380004	0.0896681			0.636149	-0.0150651	0.0169062			0.101079	0.046192	0.0406616			-0.148461	-0.00490161	0.0111214			-0.169511	-0.0173717	0.00396614			-0.0211066	-0.0263799	0.0681479			-0.0650934	-0.0286097	-0.00282485
-0.0733605	-0.0291851	0.00532231			2.65473	-0.299645	0.0609659			2.06433	-0.263185	0.0465089			1.2697	-0.041167	0.0895459			0.674419	-0.0148894	0.0170571			0.0930399	0.0507169	0.0402071			-0.161792	-0.00155995	0.0107958			-0.176656	-0.0172239	0.00348981			-0.00838649	-0.0265334	0.0684297			-0.0398072	-0.022981	-0.00247797
-0.08955	-0.0279378	0.00543661			2.68181	-0.303536	0.0621649			2.0589	-0.266442	0.0464179			1.27128	-0.0397194	0.0895109			0.667378	-0.0142745	0.0162451			0.101569	0.0506315	0.0401912			-0.184442	-0.00225937	0.00997477			-0.191221	-0.0183327	0.00404903			0.0147187	-0.0295258	0.0681295			-0.0243812	-0.0198059	-0.0022069
-0.0851999	-0.0290538	0.00611535			2.69172	-0.307788	0.0641439			2.05461	-0.265447	0.0462896			1.28126	-0.0431573	0.0916255			0.669796	-0.018667	0.0163433			0.141614	0.047558	0.0418302			-0.211719	-0.00404677	0.00983378			-0.190589	-0.0172978	0.00483742			0.0405492	-0.0282214	0.0696196			-0.0297171	-0.0208161	-0.00174744
-0.0745913	-0.0324895	0.00706223			2.69833	-0.311678	0.0662895			2.08868	-0.264723	0.046586			1.28316	-0.0480428	0.0921871			0.691529	-0.0191062	0.0161661			0.147937	0.0474726	0.0418589			-0.224397	-0.00785471	0.00950526			-0.188262	-0.0209939	0.00507461			0.0367214	-0.0275309	0.0700084			-0.0278424	-0.0221872	-0.00159211
-0.0765529	-0.0302136	0.0075456			2.679	-0.311769	0.0681541			2.09159	-0.263728	0.0465367			1.29956	-0.0450572	0.0947673			0.712841	-0.0184034	0.0154231			0.13713	0.049607	0.0429303			-0.21304	-0.00894269	0.00998833			-0.172715	-0.0212157	0.00530148			0.0755721	-0.0234642	0.0694685			-0.0187238	-0.0251459	-0.00104081
-0.0706274	-0.0303449	0.00803144			2.67095	-0.314754	0.0699415			2.12149	-0.26608	0.0466152			1.29343	-0.0439716	0.0957292			0.737562	-0.0202483	0.0153652			0.112687	0.048924	0.0427676			-0.204477	-0.00684444	0.0105674			-0.174269	-0.0184806	0.00578172			0.0773994	-0.0256126	0.0688831			-0.0249306	-0.0257953	-0.000930613
-0.0779983	-0.0335836	0.00878371			2.64069	-0.314211	0.0707284			2.11967	-0.268161	0.0471976			1.30174	-0.0437002	0.0977204			0.711368	-0.0191062	0.0150475			0.116162	0.0455944	0.0425101			-0.218373	-0.00536789	0.0101648			-0.166529	-0.0236551	0.00607142			0.0828711	-0.0237711	0.0683232			-0.030198	-0.0272386	-0.00121408
-0.0900401	-0.0345684	0.0099235			2.66261	-0.314573	0.0724593			2.12799	-0.26979	0.0474347			1.35412	-0.047319	0.100274			0.691872	-0.0212146	0.014844			0.132637	0.0465335	0.0426267			-0.227917	-0.00855413	0.00937652			-0.141095	-0.0263902	0.00565529			0.0644381	-0.0234642	0.067845			-0.0251149	-0.0244964	-0.00145248
-0.0953583	-0.0326427	0.0109472			2.69808	-0.321359	0.073246			2.10802	-0.270785	0.0474695			1.33527	-0.0439716	0.101801			0.71153	-0.0243772	0.015395			0.161003	0.0471311	0.0428705			-0.244175	-0.0115072	0.0090085			-0.134714	-0.0269816	0.00501802			0.0813999	-0.0243082	0.0673638			-0.0206492	-0.0251459	-0.00163678
-0.0900956	-0.0308264	0.0109447			2.724	-0.31964	0.0744312			2.06869	-0.271056	0.0474583			1.32175	-0.0446954	0.102546			0.717974	-0.0246407	0.0156245			0.167522	0.0456798	0.0437318			-0.22196	-0.0115849	0.0089746			-0.113144	-0.0232116	0.00452249			0.0754275	-0.0221598	0.067378			-0.0118048	-0.0282488	-0.00172611
-0.0944607	-0.0320081	0.0111376			2.74427	-0.317921	0.074609			2.06822	-0.272232	0.0472144			1.3206	-0.0483142	0.102481			0.718114	-0.0232351	0.0153881			0.166236	0.0454236	0.0445644			-0.224695	-0.00878726	0.00896091			-0.106984	-0.0243204	0.00433922			0.0588551	-0.0204718	0.0668381			-0.000421865	-0.0301251	-0.00227653
-0.0882754	-0.0297103	0.011367			2.75687	-0.318011	0.0739872			2.03325	-0.276123	0.0475509			1.32533	-0.0450572	0.103382			0.698159	-0.024465	0.0155456			0.186388	0.0487533	0.0449453			-0.2071	-0.00816556	0.0107027			-0.0887873	-0.0235812	0.0041971			0.0508708	-0.0212391	0.0654944			-0.0245316	-0.026084	-0.00297313
-0.0933166	-0.0293164	0.0110895			2.78693	-0.319911	0.0729769			2.08549	-0.279742	0.0476404			1.3297	-0.0437906	0.105524			0.708893	-0.0240258	0.0157601			0.197764	0.048924	0.0457652			-0.171882	-0.00552331	0.0103973			-0.0744759	-0.0184066	0.00356321			0.0494687	-0.0236177	0.0647056			-0.0290033	-0.0224037	-0.0033239
-0.11064	-0.0302793	0.0111067			2.79715	-0.321087	0.0726423			2.06729	-0.281008	0.0472054			1.38806	-0.0471381	0.10772			0.698949	-0.0251678	0.0164198			0.192605	0.0464481	0.0457043			-0.172785	-0.00497932	0.0118343			-0.0600267	-0.0189241	0.00339963			0.0466433	-0.0221598	0.0641976			-0.0103858	-0.0226924	-0.0038365
-0.127282	-0.0297541	0.0111661			2.80717	-0.324254	0.0717169			2.05842	-0.281189	0.0476142			1.37836	-0.0513903	0.11015			0.731566	-0.0241136	0.0169595			0.209515	0.0506315	0.0454056			-0.124132	-0.00653358	0.0124136			-0.0641792	-0.0181849	0.00389612			0.0467344	-0.0211623	0.0632439			-0.00751957	-0.0205275	-0.00418853
-0.136881	-0.0266248	0.0113988			2.78255	-0.330587	0.0703723			2.03754	-0.281913	0.0486264			1.37829	-0.0493094	0.11258			0.762877	-0.0249921	0.0175483			0.195321	0.0515706	0.0464778			-0.116475	-0.00497932	0.0130155			-0.0561669	-0.0115319	0.0039011			0.0858536	-0.0230806	0.0630599			-0.0199011	-0.0173524	-0.00461849
-0.14102	-0.0262966	0.0114716			2.81321	-0.328235	0.0703435			2.02557	-0.283089	0.0499146			1.4094	-0.0484952	0.113279			0.745965	-0.0229716	0.0177705			0.209574	0.0493509	0.0464894			-0.103541	-0.00257022	0.0134252			-0.060115	-0.00953596	0.00361178			0.0718366	-0.0213158	0.0616872			-0.0104501	-0.0189399	-0.00565512
-0.142922	-0.0287256	0.0118487			2.79755	-0.328596	0.0697897			2.01444	-0.285713	0.0510059			1.40964	-0.0512093	0.114111			0.725439	-0.0231473	0.0176237			0.230572	0.0496924	0.0466847			-0.134276	-0.00194851	0.0136794			-0.0474845	-0.0136017	0.00349998			0.0519037	-0.0229271	0.0606793			-0.0243349	-0.0193729	-0.00633491
-0.140767	-0.0303012	0.012229			2.83119	-0.333753	0.0688737			2.02631	-0.286979	0.051406			1.3935	-0.0529283	0.113907			0.743556	-0.0221809	0.0183181			0.226025	0.0486679	0.0466796			-0.12583	-0.00319192	0.014626			-0.0267463	-0.0143409	0.00387941			0.0563824	-0.0259963	0.059486			-0.0297328	-0.0159091	-0.00678853
-0.127749	-0.0301261	0.0122366			2.85406	-0.337644	0.068803			2.04822	-0.286436	0.0513755			1.41184	-0.0521141	0.114987			0.736406	-0.0252557	0.0187491			0.227437	0.0493509	0.04581			-0.130223	-0.00637816	0.0151336			-0.0357285	-0.0135278	0.00345122			0.0653895	-0.0240781	0.058732			-0.0291514	-0.0155483	-0.00762882
-0.123074	-0.0320081	0.0125804			2.85048	-0.338458	0.0683239			2.05541	-0.284989	0.0509882			1.4098	-0.0576329	0.114723			0.73032	-0.0263977	0.0187078			0.212801	0.0445699	0.0472771			-0.121429	-0.00847641	0.0161538			-0.0504033	-0.0134538	0.00369867			0.0716652	-0.0221598	0.0585365			-0.042496	-0.0193729	-0.00831086
-0.127067	-0.0322706	0.0131318			2.85065	-0.33891	0.0678643			2.05619	-0.284175	0.0501966			1.38015	-0.0589899	0.116368			0.711188	-0.0256071	0.019114			0.219842	0.0469604	0.0484542			-0.14783	-0.00870955	0.0185996			-0.0344236	-0.0176674	0.00403758			0.0680403	-0.0206252	0.0578405			-0.0404626	-0.0208161	-0.00897284
-0.129385	-0.0312421	0.0135593			2.86224	-0.338729	0.0670799			2.09788	-0.28526	0.0501044			1.35897	-0.0551901	0.117117			0.698967	-0.0261342	0.0188523			0.237142	0.0461066	0.0492528			-0.141206	-0.00645587	0.0201515			-0.042995	-0.0153758	0.00443653			0.0577808	-0.0233108	0.0568456			-0.0392552	-0.0221151	-0.00944044
-0.138062	-0.0337149	0.0138358			2.84481	-0.338729	0.0669263			2.07574	-0.289874	0.0495887			1.38886	-0.0530188	0.116406			0.675651	-0.0270127	0.0182295			0.232951	0.0421794	0.0496482			-0.135923	-0.00738843	0.0214436			-0.0835725	-0.0178892	0.00468361			0.0285271	-0.0220831	0.0560742			-0.0291325	-0.0201667	-0.00955428
-0.124145	-0.0345684	0.0138958			2.84057	-0.340177	0.0664109			2.07835	-0.288065	0.049783			1.3861	-0.0564567	0.115373			0.689962	-0.0285061	0.0176938			0.235006	0.0435454	0.0494692			-0.126461	-0.00870956	0.0231013			-0.0690103	-0.0216592	0.00444063			0.045411	-0.0230806	0.0550078			-0.00946638	-0.0226202	-0.00965871
-0.131094	-0.0334305	0.0141503			2.85267	-0.343253	0.0660472			2.07267	-0.287251	0.0491291			1.39759	-0.0562758	0.115613			0.707845	-0.0305267	0.0175966			0.239148	0.0431185	0.0517425			-0.137811	-0.0108855	0.0246317			-0.0455441	-0.0218071	0.00407913			0.0878864	-0.0210856	0.0549354			-0.00531833	-0.0226924	-0.00964
-0.130355	-0.0304544	0.0146711			2.85675	-0.345605	0.0652253			2.07949	-0.288879	0.0491002			1.36754	-0.0531997	0.115963			0.71471	-0.0320201	0.0180623			0.246736	0.0426063	0.0538505			-0.148754	-0.0105747	0.0252435			-0.0768157	-0.0172978	0.00381625			0.0777734	-0.0212391	0.0537222			-0.017912	-0.0239191	-0.00955481
-0.127945	-0.0307826	0.0149214			2.86054	-0.338729	0.0656236			2.10321	-0.288789	0.0490503			1.37857	-0.0553711	0.117454			0.727262	-0.0305267	0.018493			0.23769	0.0421794	0.0531457			-0.154653	-0.00637816	0.0250066			-0.0783624	-0.0186284	0.00362988			0.0967959	-0.0182466	0.0523337			-0.0435905	-0.025651	-0.00913351
-0.12364	-0.0315047	0.0150017			2.89672	-0.340267	0.0662087			2.08138	-0.293946	0.0487645			1.37231	-0.0532902	0.117663			0.699321	-0.0307902	0.0188338			0.256735	0.0426063	0.0545684			-0.15053	-0.00295878	0.0252731			-0.0824763	-0.0198112	0.00353463			0.109427	-0.0197812	0.0511694			-0.0435759	-0.0231975	-0.00854686
-0.113806	-0.0291851	0.0148841			2.89608	-0.344429	0.0660529			2.12508	-0.297836	0.048651			1.37231	-0.0527474	0.117556			0.692645	-0.0318444	0.019483			0.256819	0.0456798	0.0573073			-0.163636	-0.00319193	0.026342			-0.0743629	-0.0138974	0.00372211			0.110375	-0.0233108	0.0505865			-0.028719	-0.0174967	-0.0082024
-0.113805	-0.0272813	0.0150775			2.92186	-0.344067	0.0655835			2.1812	-0.298288	0.0490133			1.36227	-0.0550092	0.118154			0.67653	-0.0328108	0.0205318			0.215368	0.0412403	0.0574925			-0.162386	-0.00218165	0.0269386			-0.0444582	-0.0127146	0.00396333			0.109019	-0.0239246	0.0507029			-0.0230384	-0.0159813	-0.00777673
-0.10398	-0.0290757	0.0152532			2.90585	-0.345605	0.065463			2.15664	-0.298017	0.0490941			1.42879	-0.058809	0.118877			0.689932	-0.030351	0.0208321			0.233744	0.0424355	0.0575611			-0.154785	-0.00280336	0.0267559			-0.046596	-0.0130842	0.00403868			0.105389	-0.0234642	0.0508043			-0.0517941	-0.017641	-0.00684979
-0.0922415	-0.0267999	0.0151333			2.91645	-0.349495	0.065982			2.15423	-0.297293	0.050403			1.42986	-0.05709	0.120305			0.710364	-0.0313173	0.0210456			0.247156	0.0432039	0.05823			-0.184353	-0.00155995	0.0262017			-0.0624608	-0.00975773	0.00353935			0.0905399	-0.0221598	0.0513185			-0.0606079	-0.018507	-0.00542702
-0.0958888	-0.0260121	0.014436			2.92784	-0.348138	0.0668382			2.15146	-0.301636	0.0511172			1.43934	-0.0552806	0.121934			0.726269	-0.0286818	0.0210361			0.256174	0.0430332	0.0596779			-0.184438	0.00038288	0.0277641			-0.0802103	-0.006653	0.00308961			0.0969616	-0.0237711	0.050764			-0.0631535	-0.0167751	-0.00398717
-0.10261	-0.0273907	0.0140404			2.9279	-0.348138	0.0665008			2.1712	-0.300007	0.0507807			1.44306	-0.0574519	0.121545			0.720908	-0.0278912	0.0213871			0.280237	0.0416671	0.0610474			-0.159119	0.00279199	0.028732			-0.0726298	-0.00946205	0.00272607			0.0913197	-0.0231573	0.0510629			-0.06616	-0.0154761	-0.00336578
-0.101982	-0.0294915	0.0135832			2.94486	-0.352752	0.0661279			2.1832	-0.299193	0.051713			1.41261	-0.0584471	0.121841			0.716738	-0.0299996	0.0219682			0.291759	0.0392767	0.0601804			-0.158787	-0.00101596	0.0288235			-0.0847643	-0.0124929	0.00261217			0.0901355	-0.0290655	0.0509631			-0.0723317	-0.0159091	-0.00185526
-0.101885	-0.0284849	0.0131747			2.94339	-0.357186	0.0667284			2.1654	-0.299193	0.0522607			1.41596	-0.0587185	0.121675			0.716369	-0.0316687	0.0229739			0.290096	0.0409841	0.0601428			-0.149041	-0.00241479	0.028105			-0.0643831	-0.0115319	0.00214079			0.0964967	-0.0266101	0.0514898			-0.0635227	-0.0134556	-0.000111422
-0.106963	-0.0275658	0.0127925			2.91546	-0.356914	0.0663698			2.16713	-0.29666	0.0535477			1.42152	-0.0598947	0.124349			0.697036	-0.0358855	0.0231685			0.304556	0.0379107	0.0602626			-0.159513	-0.000549679	0.0279415			-0.0539709	-0.0102013	0.00143464			0.0979987	-0.0263799	0.0525163			-0.061105	-0.018074	0.000742663
-0.089155	-0.0292945	0.0123363			2.88138	-0.354019	0.0662926			2.18567	-0.298107	0.054321			1.39172	-0.0609803	0.125964			0.684241	-0.0338649	0.0234492			0.275919	0.0349225	0.060473			-0.146177	-0.00155995	0.0278156			-0.0603437	-0.0141191	0.0010843			0.121092	-0.026073	0.0521329			-0.0519427	-0.0219707	0.00128413
-0.0980701	-0.0297103	0.0118924			2.83638	-0.355195	0.0664302			2.21564	-0.298469	0.0549174			1.4029	-0.058628	0.125457			0.705794	-0.0331621	0.0236025			0.284289	0.0358616	0.060383			-0.117553	-0.00086053	0.0295568			-0.062284	-0.0159672	0.000904446			0.117377	-0.0257661	0.0517314			-0.0411083	-0.0220429	0.00201142
-0.0924376	-0.0298635	0.0116439			2.85997	-0.355557	0.0663553			2.22307	-0.300369	0.0564359			1.41619	-0.0566377	0.12508			0.685242	-0.036149	0.0239323			0.271425	0.035264	0.0606912			-0.128947	-0.00148223	0.030172			-0.0636957	-0.0172978	0.000249257			0.116131	-0.0286051	0.0542794			-0.0107619	-0.0201667	0.00243925
-0.102937	-0.0313734	0.0111574			2.88341	-0.354381	0.0674678			2.19799	-0.298741	0.0576726			1.41718	-0.0580852	0.126866			0.670194	-0.0384331	0.0241437			0.312785	0.0324466	0.0604946			-0.122822	-0.0036582	0.0301195			-0.0640802	-0.0192937	0.000481236			0.112478	-0.0286051	0.0553817			-0.00240975	-0.0229088	0.00300877
-0.102044	-0.0297979	0.0107271			2.89305	-0.3561	0.0677205			2.20873	-0.29856	0.0584728			1.42242	-0.062066	0.126474			0.673702	-0.0372032	0.0243705			0.324049	0.0323613	0.0605537			-0.108283	-0.00435762	0.03088			-0.0481199	-0.0200329	0.000327294			0.11771	-0.0267636	0.0548379			0.00423735	-0.026084	0.0035868
-0.116737	-0.0260777	0.0104709			2.92296	-0.354924	0.0674502			2.21046	-0.296207	0.0584721			1.43052	-0.0560948	0.127015			0.691787	-0.0384331	0.0247779			0.340564	0.0330443	0.060001			-0.0952516	-0.00241479	0.0307753			-0.084533	-0.0169282	0.000909422			0.108143	-0.026073	0.0551193			0.00137909	-0.0234861	0.00451799
-0.108725	-0.0245678	0.0102089			2.92809	-0.351305	0.0672154			2.18383	-0.302269	0.0597256			1.41512	-0.0562758	0.127998			0.693002	-0.0381696	0.0259763			0.3509	0.0329589	0.0592931			-0.104336	0.00131543	0.0318933			-0.069265	-0.0148584	0.00165252			0.0781327	-0.0271472	0.056161			0.0289805	-0.0249294	0.00576559
-0.12356	-0.0272375	0.0102597			2.90436	-0.350672	0.0676696			2.18487	-0.301726	0.061843			1.39451	-0.0557329	0.128053			0.701775	-0.0377303	0.0266521			0.348575	0.0320198	0.058773			-0.0822668	0.00426854	0.0321133			-0.0830815	-0.0158194	0.00158551			0.0746894	-0.0293724	0.0584246			0.0205182	-0.0241356	0.00684948
-0.123102	-0.0254212	0.0102601			2.89475	-0.352119	0.0682819			2.18203	-0.304893	0.0634363			1.38226	-0.0574519	0.129782			0.698593	-0.0369397	0.028064			0.347809	0.0327028	0.0601585			-0.0954252	0.00380225	0.0318083			-0.0773579	-0.0140452	0.00195967			0.0555067	-0.0302164	0.0590264			0.0188126	-0.0185791	0.00742375
-0.139944	-0.0214823	0.0101762			2.88541	-0.353657	0.0685671			2.17575	-0.306159	0.0649838			1.40144	-0.057271	0.129685			0.72799	-0.0415957	0.0288389			0.400461	0.0329589	0.0610007			-0.0588755	0.00356912	0.0326343			-0.0715794	-0.0115319	0.00292257			0.0426526	-0.0326717	0.05954			0.022671	-0.0167029	0.00814988
-0.151384	-0.0223357	0.0105527			2.91224	-0.354019	0.0690396			2.12793	-0.305255	0.0654246			1.43521	-0.058628	0.132193			0.724782	-0.0401901	0.0306108			0.389797	0.0298854	0.0609912			-0.0520954	0.00558966	0.0333218			-0.0829068	-0.00960989	0.00304646			0.0277971	-0.0324416	0.0602703			0.0301767	-0.0182905	0.00806681
-0.137376	-0.0216792	0.0110712			2.93103	-0.353386	0.0693315			2.10503	-0.303898	0.0662482			1.42716	-0.0602565	0.131382			0.680377	-0.036149	0.0312227			0.414458	0.0305684	0.0607691			-0.024242	0.00753248	0.034764			-0.0824849	-0.00820536	0.0030137			0.0386655	-0.0308302	0.0610709			0.0185587	-0.0195894	0.00893675
-0.13077	-0.0203662	0.0112597			2.93127	-0.352481	0.0697564			2.08836	-0.306521	0.0657232			1.42579	-0.0560948	0.131425			0.682784	-0.0381696	0.03339			0.463587	0.0312514	0.0606013			-0.0339428	0.00854276	0.0349539			-0.0901439	-0.00650515	0.00328909			0.0287055	-0.0360478	0.0608017			0.0167542	-0.0167751	0.00991534
-0.131585	-0.0215917	0.0114092			2.90812	-0.353657	0.0708036			2.10657	-0.307607	0.0655799			1.43693	-0.0575424	0.131084			0.676764	-0.0377303	0.0345077			0.475163	0.0303123	0.0604951			-0.0597064	0.0103302	0.03508			-0.0811781	-0.00687477	0.00332412			0.0165771	-0.0358177	0.0609059			0.00678098	-0.0153318	0.0103724
-0.134688	-0.0232548	0.0121308			2.88047	-0.355286	0.0704249			2.09513	-0.305526	0.0651464			1.45234	-0.0599851	0.134407			0.652749	-0.0369397	0.0362481			0.462041	0.0259582	0.0610538			-0.025988	0.00628907	0.034973			-0.0750997	-0.0107926	0.00348516			-0.00365164	-0.0391937	0.0607896			0.0184257	-0.0183626	0.010855
-0.136538	-0.0230579	0.0127361			2.91208	-0.358452	0.069209			2.09	-0.302993	0.0652367			1.43598	-0.0606184	0.134551			0.683915	-0.0408051	0.0385403			0.462488	0.0287755	0.0603379			-0.0191523	0.00535652	0.0348915			-0.0612738	-0.0138974	0.00354845			-0.00771628	-0.036585	0.0613688			0.0214267	-0.0167751	0.011129
-0.128803	-0.0216792	0.0134196			2.86384	-0.357728	0.0691256			2.12688	-0.302902	0.0649071			1.41241	-0.058809	0.135627			0.643092	-0.0415957	0.0403327			0.443548	0.0274949	0.0593999			-0.0205594	0.00590051	0.0347576			-0.070521	-0.0108666	0.00356224			-0.0183444	-0.0390403	0.0615687			0.0189708	-0.0190121	0.0112842
-0.142361	-0.0219418	0.0136553			2.81983	-0.355376	0.0689245			2.10885	-0.300279	0.063912			1.42789	-0.0587185	0.138398			0.608399	-0.0412443	0.0431767			0.429652	0.024336	0.0591678			-0.0187654	0.00698849	0.0353882			-0.0693698	-0.0133799	0.00377148			-0.0279892	-0.039117	0.0603835			0.0170996	-0.0242799	0.0115157
-0.139858	-0.0244584	0.0137659			2.81775	-0.353838	0.0680813			2.09607	-0.300369	0.0641929			1.40697	-0.0611613	0.14087			0.596855	-0.0391359	0.0462169			0.413088	0.0222017	0.0588568			-0.00611641	0.00706621	0.0360075			-0.0785796	-0.0169282	0.00443728			-0.0359425	-0.0369686	0.0601216			0.017284	-0.0240634	0.0111971
-0.146985	-0.0233205	0.013819			2.79415	-0.353386	0.0676914			2.09349	-0.302902	0.0639384			1.40553	-0.0548282	0.141232			0.626916	-0.0422107	0.0481605			0.398842	0.0237384	0.0588455			-0.018629	0.00450168	0.0370364			-0.0451526	-0.0192198	0.00512427			-0.03273	-0.0397309	0.0593936			0.0384674	-0.0214656	0.0105972
-0.152791	-0.0213947	0.0136662			2.79641	-0.355105	0.0675502			2.08846	-0.300731	0.0639405			1.4099	-0.0552806	0.142038			0.65068	-0.0457246	0.05097			0.38215	0.0213479	0.0593519			-0.0242874	0.00380226	0.039616			-0.0553572	-0.0166325	0.00527196			-0.0546382	-0.0418025	0.0579453			0.0184938	-0.0258675	0.0097307
-0.155387	-0.0220731	0.013341			2.7896	-0.35221	0.0673			2.12196	-0.297384	0.0632328			1.37978	-0.058809	0.142659			0.667777	-0.0422107	0.0533526			0.404939	0.0186159	0.0584384			-0.0365743	0.0028697	0.0399823			-0.0598831	-0.018998	0.00511048			-0.0663207	-0.0398076	0.0569712			0.00252499	-0.0276715	0.00885539
-0.136511	-0.019469	0.0130508			2.76381	-0.3504	0.0674086			2.09643	-0.298379	0.0631701			1.37243	-0.0557329	0.145528			0.662767	-0.0454611	0.0556653			0.38307	0.0211772	0.0579001			-0.00400556	0.00628907	0.0402773			-0.0179189	-0.0172978	0.00583535			-0.0664634	-0.0393472	0.0567823			-0.0264868	-0.0260118	0.00844157
-0.137442	-0.0161428	0.0124075			2.78768	-0.347053	0.0674437			2.10565	-0.301817	0.0633595			1.36872	-0.0512093	0.148052			0.658045	-0.0435284	0.0565447			0.380855	0.0217748	0.0584074			-0.0111721	0.00955302	0.0410484			-0.000197697	-0.0147105	0.00644768			-0.0771476	-0.0426466	0.0569177			-0.0398028	-0.0268056	0.0078687
-0.141742	-0.0175871	0.0120293			2.79797	-0.344339	0.0678791			2.12603	-0.301274	0.0653496			1.36753	-0.0517522	0.148477			0.650533	-0.0429135	0.0593205			0.385809	0.020238	0.0586612			-0.0123467	0.0124284	0.0401265			-0.0171435	-0.0151541	0.00663826			-0.0887469	-0.0432604	0.0566849			-0.0339845	-0.0249294	0.0078882
-0.149985	-0.0182873	0.0116666			2.79292	-0.345153	0.0690297			2.15018	-0.301545	0.0662327			1.36033	-0.0541949	0.152813			0.668756	-0.0428256	0.060794			0.376055	0.0203234	0.0589653			-0.0232565	0.010641	0.0389416			-0.00902149	-0.014267	0.00649132			-0.0856642	-0.0452554	0.0559524			-0.0299014	-0.0212491	0.00762822
-0.142363	-0.0143703	0.0114808			2.80461	-0.347686	0.070071			2.12994	-0.301183	0.0676062			1.37978	-0.0532902	0.154007			0.617399	-0.0433527	0.0644864			0.357824	0.0222017	0.0598738			-0.0218933	0.011185	0.0387118			-0.0115363	-0.0114579	0.0068692			-0.097485	-0.0462529	0.0557379			-0.024083	-0.0171359	0.0072668
-0.145051	-0.011613	0.0113874			2.78041	-0.345424	0.0702663			2.11404	-0.300822	0.0686606			1.35258	-0.0529283	0.153803			0.585575	-0.0440555	0.0664506			0.3678	0.0187013	0.0597115			-0.0295672	0.0149929	0.0371835			-0.0359751	-0.00643123	0.0076729			-0.091216	-0.0471736	0.0563595			-0.00811322	-0.0181461	0.00707965
-0.144475	-0.0133636	0.0107224			2.79673	-0.345062	0.0707347			2.11802	-0.299645	0.0702989			1.35298	-0.0539235	0.158496			0.613376	-0.0400144	0.0675705			0.356594	0.0174207	0.0621818			-0.0407272	0.01849	0.0377731			-0.0380921	-0.00827929	0.00808602			-0.0928176	-0.044795	0.0565418			-0.0177159	-0.020311	0.00681293
-0.1457	-0.0137575	0.0100392			2.74993	-0.343434	0.0722461			2.11447	-0.298741	0.0707719			1.36565	-0.0529283	0.161697			0.63506	-0.039663	0.0690938			0.374163	0.0201527	0.063911			-0.0410042	0.0180238	0.0382406			-0.0427064	-0.00953596	0.00847479			-0.0763909	-0.0490151	0.0560804			-0.0125415	-0.0181461	0.00653474
-0.142557	-0.013101	0.00960936			2.73606	-0.346419	0.073029			2.12162	-0.30046	0.071838			1.38071	-0.0497618	0.161732			0.629407	-0.0411565	0.0699868			0.35785	0.0187867	0.0644732			-0.0711901	0.0178683	0.0368735			-0.0354024	-0.00909243	0.00889064			-0.0962507	-0.0513937	0.0557806			-0.0136517	-0.0159813	0.00556371
-0.156038	-0.0148517	0.00916136			2.74405	-0.347053	0.0742098			2.11115	-0.295212	0.0745277			1.384	-0.0533807	0.164765			0.628699	-0.0400144	0.0717202			0.403674	0.014774	0.0651682			-0.0708233	0.0187232	0.0357999			-0.0543714	-0.0110883	0.00912863			-0.114292	-0.0524679	0.0552008			-0.0287285	-0.017641	0.0050218
-0.13749	-0.0147642	0.00846427			2.76415	-0.345153	0.07477			2.10676	-0.293131	0.0763596			1.38431	-0.0557329	0.167588			0.65499	-0.0415079	0.0724411			0.420002	0.0159693	0.065727			-0.0802771	0.0151484	0.0351278			-0.0293837	-0.0132321	0.0102112			-0.115673	-0.0502428	0.0551091			-0.0332713	-0.0203832	0.00495122
-0.125615	-0.0130792	0.00771115			2.74269	-0.346058	0.0751594			2.1025	-0.291412	0.0790117			1.36756	-0.0498523	0.170499			0.653064	-0.0395752	0.0738805			0.440645	0.0163108	0.0663653			-0.100424	0.0157701	0.0348494			-0.0451468	-0.0135278	0.0111407			-0.0973248	-0.0510101	0.054479			-0.0617767	-0.0199502	0.00515038
-0.13066	-0.0138013	0.00692729			2.72134	-0.341624	0.0774683			2.10377	-0.289693	0.0809486			1.35349	-0.049219	0.171452			0.683251	-0.0428256	0.0758068			0.518813	0.0135788	0.0686206			-0.104204	0.0155369	0.0347677			-0.0551622	-0.0132321	0.0112239			-0.0765856	-0.0526214	0.0536708			-0.0660937	-0.0232697	0.00476661
-0.130281	-0.0154863	0.00659025			2.70867	-0.338367	0.0791955			2.08194	-0.288879	0.0826351			1.35549	-0.0478619	0.173931			0.6785	-0.0409808	0.0774651			0.531233	0.0115298	0.068705			-0.0934788	0.0177906	0.0349808			-0.0785544	-0.0175196	0.0105997			-0.0669745	-0.0528516	0.0532684			-0.0666003	-0.0244964	0.00439759
-0.128432	-0.0158364	0.0062465			2.70581	-0.338729	0.0782994			2.07042	-0.286527	0.0837137			1.35616	-0.0480428	0.177488			0.667734	-0.043177	0.079129			0.540367	0.0131519	0.0686442			-0.106432	0.0145267	0.0351328			-0.0540864	-0.02092	0.0105194			-0.0664543	-0.0561509	0.0527118			-0.0567539	-0.0217543	0.00491043
-0.118146	-0.013101	0.0057471			2.70446	-0.340991	0.0787206			2.07758	-0.285532	0.086373			1.36725	-0.0455096	0.185655			0.66565	-0.0430013	0.078914			0.563449	0.0119567	0.0692118			-0.0902396	0.0140604	0.0356047			-0.0742112	-0.0191459	0.010844			-0.0781864	-0.0567648	0.0522856			-0.0680927	-0.022548	0.00543448
-0.119921	-0.0100374	0.00527596			2.69462	-0.335472	0.0807583			2.09391	-0.281008	0.0874031			1.40074	-0.0437002	0.189038			0.662691	-0.0409808	0.0774216			0.550468	0.00811478	0.0700725			-0.0920901	0.0162364	0.0348283			-0.0554753	-0.0165586	0.0108698			-0.0806046	-0.0543862	0.0518848			-0.0765808	-0.0244964	0.00517301
-0.130209	-0.0120944	0.0049466			2.67055	-0.330587	0.0825238			2.07954	-0.282094	0.0876001			1.38317	-0.0465953	0.191083			0.665018	-0.0389602	0.0773849			0.528322	0.0107614	0.0710236			-0.102474	0.0174798	0.0343459			-0.0762138	-0.0186284	0.010843			-0.0925539	-0.0526981	0.0512264			-0.0666104	-0.0250015	0.00548966
-0.12358	-0.00894325	0.00462411			2.67203	-0.329682	0.0862903			2.08388	-0.283994	0.0877775			1.36411	-0.0384528	0.190875			0.667316	-0.0398387	0.0777508			0.527582	0.0122982	0.0720603			-0.111136	0.0213654	0.0344739			-0.100732	-0.0168543	0.010693			-0.0773092	-0.055844	0.0507401			-0.0682191	-0.0236305	0.00619427
-0.126259	-0.00846182	0.00420871			2.6243	-0.327601	0.0907057			2.0738	-0.282365	0.0901906			1.38668	-0.0358291	0.192361			0.674758	-0.0376425	0.0771556			0.527069	0.00990765	0.0719134			-0.127252	0.0219094	0.0339223			-0.0983227	-0.0147105	0.0107293			-0.0856976	-0.0570717	0.0496724			-0.0393836	-0.0197337	0.00677788
-0.110994	-0.0090089	0.00405215			2.66148	-0.325882	0.0931329			2.0718	-0.279651	0.0917347			1.3787	-0.0410765	0.197868			0.669737	-0.0375546	0.0759793			0.492754	0.0105907	0.0708707			-0.104103	0.0219871	0.0335067			-0.0719057	-0.0127146	0.0103048			-0.0902491	-0.0592968	0.0490313			-0.021253	-0.0184348	0.00682131
-0.116743	-0.00767403	0.00349909			2.67789	-0.325701	0.0954895			2.04612	-0.276575	0.0945839			1.39808	-0.0378195	0.202275			0.665229	-0.0345677	0.0747398			0.475552	0.0128104	0.0703983			-0.104322	0.0226088	0.0330863			-0.0637974	-0.0122711	0.00985167			-0.097036	-0.058683	0.0492269			-0.0168969	-0.0162699	0.00722535
-0.113773	-0.00316611	0.00301699			2.64036	-0.325249	0.0975082			2.02215	-0.275127	0.0970396			1.40247	-0.0357386	0.20883			0.664975	-0.0328986	0.0726607			0.441148	0.012042	0.0699842			-0.118732	0.0249402	0.0328991			-0.0549066	-0.0053224	0.00944424			-0.0888736	-0.0592968	0.0492591			-0.0193696	-0.0156205	0.00785167
-0.100102	-0.00439157	0.00275288			2.6111	-0.321811	0.102376			2.014	-0.274132	0.103534			1.37993	-0.0333864	0.212851			0.683243	-0.0299996	0.0718729			0.440252	0.0100784	0.0698687			-0.0913772	0.0299916	0.0329492			-0.0527507	-0.00672692	0.00939175			-0.0796992	-0.0573786	0.0483589			-0.00820064	-0.0163421	0.00752982
-0.0902792	-0.00760838	0.00213516			2.59872	-0.319278	0.107016			1.95228	-0.272866	0.108226			1.36447	-0.0323007	0.220931			0.725502	-0.0282426	0.0718696			0.415686	0.0111883	0.0691063			-0.0716581	0.0310796	0.0328786			-0.0510001	-0.0118276	0.00956459			-0.0920526	-0.0593736	0.0482133			-0.00376035	-0.0140329	0.00672379
-0.100189	-0.00688624	0.00185862			2.59305	-0.319549	0.108885			1.92045	-0.269156	0.114341			1.36402	-0.0314865	0.226384			0.722175	-0.0286818	0.0727695			0.437257	0.00939541	0.0690504			-0.0677702	0.0275825	0.0324204			-0.0493342	-0.0125668	0.00919919			-0.100323	-0.0639773	0.0488697			-0.0105841	-0.0119402	0.00623858
-0.104018	-0.00640481	0.00118925			2.58329	-0.321992	0.112296			1.90275	-0.26409	0.117501			1.40335	-0.0269629	0.231047			0.713491	-0.028594	0.0747456			0.427082	0.00888316	0.0679592			-0.0844913	0.0270385	0.0324364			-0.0423895	-0.0101273	0.0091166			-0.101484	-0.0609082	0.0491382			-0.0146132	-0.0121567	0.00640377
-0.104792	-0.00767403	0.000495252			2.57581	-0.317468	0.117013			1.87994	-0.259114	0.122496			1.38929	-0.0305817	0.239691			0.747726	-0.0273641	0.0767045			0.395612	0.00683416	0.0677947			-0.0778573	0.0258728	0.0320194			-0.0572341	-0.0129364	0.009033			-0.0820033	-0.0617522	0.0486388			0.00179314	-0.0154761	0.00635238
-0.109217	-0.00769591	6.1001e-05			2.57939	-0.314754	0.121679			1.89417	-0.255224	0.126817			1.40336	-0.0293151	0.244947			0.772989	-0.0257828	0.0804949			0.397614	0.00717566	0.0681852			-0.0951827	0.0269608	0.0313834			-0.0395923	-0.0155237	0.00851296			-0.0864042	-0.0600641	0.0481244			-0.00700882	-0.018074	0.00558176
-0.104828	-0.00640481	-0.000323152			2.58146	-0.311497	0.125562			1.88166	-0.254862	0.135592			1.40653	-0.019906	0.248692			0.739981	-0.0260463	0.0821586			0.422324	0.00521204	0.0680255			-0.0600952	0.0273493	0.0312312			-0.044251	-0.0147844	0.00811069			-0.0706466	-0.0604478	0.0491171			-0.0234614	-0.0175688	0.00512391
-0.0857021	-0.00822111	-0.00111418			2.60558	-0.306431	0.129334			1.84692	-0.251514	0.142886			1.43675	-0.0188204	0.256224			0.736774	-0.0247286	0.0815359			0.38042	0.00538279	0.0672518			-0.0582743	0.0280487	0.0310064			-0.0486625	-0.0184066	0.00792582			-0.0844876	-0.0617522	0.0492598			-0.00540542	-0.0190843	0.00484354
-0.0875069	-0.0102344	-0.00127512			2.58748	-0.304983	0.131667			1.82002	-0.245996	0.148945			1.44213	-0.0201775	0.25954			0.688996	-0.0231473	0.0812049			0.363374	0.00418754	0.0658767			-0.0446039	0.0246294	0.0306528			-0.0750376	-0.0221027	0.00772646			-0.089447	-0.0629799	0.0489109			0.00183322	-0.0168472	0.00419912
-0.0994493	-0.00609845	-0.00150542			2.58628	-0.303174	0.1336			1.8143	-0.243462	0.156893			1.44342	-0.0162872	0.267887			0.673527	-0.0222688	0.0820325			0.396962	0.00657803	0.0649441			-0.0460929	0.0254065	0.0313512			-0.098309	-0.0193676	0.0075173			-0.112484	-0.0619824	0.048123			0.00134505	-0.017208	0.0035603
-0.101438	-0.00347247	-0.00198557			2.62394	-0.297384	0.137968			1.77082	-0.237401	0.161713			1.45003	-0.010497	0.277918			0.672195	-0.0208632	0.082438			0.397124	0.00350453	0.0649172			-0.0313136	0.0260282	0.0321002			-0.0947307	-0.0157454	0.00778749			-0.113298	-0.061522	0.0483439			-0.0070203	-0.018507	0.00323144
-0.110051	-0.00498241	-0.00241517			2.628	-0.291231	0.142949			1.76965	-0.235501	0.172656			1.49029	-0.00805421	0.282809			0.657909	-0.0191941	0.0834668			0.396557	0.00316304	0.0645263			-0.0403296	0.0307687	0.0327023			-0.121985	-0.0175935	0.00801136			-0.140754	-0.0593736	0.0482842			0.00615085	-0.0186513	0.0035794
-0.115009	-0.00391014	-0.00270629			2.63688	-0.289422	0.148064			1.7278	-0.233782	0.181831			1.5028	-0.00353061	0.289268			0.661045	-0.0173492	0.0863148			0.394903	0.00657804	0.0652689			-0.0317901	0.0313904	0.0329815			-0.126377	-0.0164107	0.0080442			-0.114105	-0.0626729	0.0471052			-0.0160081	-0.0167751	0.00395818
-0.110044	-0.00226891	-0.00275551			2.62171	-0.285894	0.150416			1.72586	-0.23161	0.187191			1.45979	0.00370715	0.297665			0.680412	-0.0162072	0.0879476			0.414983	0.00529741	0.0656081			-0.0337035	0.0322453	0.0339964			-0.130967	-0.0141931	0.00888527			-0.0789473	-0.0636704	0.0460644			-0.037707	-0.00934236	0.00366712
-0.113675	-0.0013717	-0.00256716			2.61777	-0.280103	0.158404			1.74926	-0.225639	0.196227			1.41816	0.0022596	0.304865			0.682293	-0.0141866	0.0896393			0.44312	0.00580966	0.0661359			-0.0340014	0.032867	0.0343985			-0.127172	-0.0110144	0.00963773			-0.0683901	-0.0654352	0.0450824			-0.00888112	-0.00941452	0.00344399
-0.109362	-0.00209384	-0.00266451			2.59125	-0.279018	0.160925			1.7445	-0.220301	0.204024			1.48986	0.0016263	0.315346			0.6885	-0.00891566	0.0932311			0.423037	0.00401679	0.0669639			-0.0289894	0.0326338	0.0349582			-0.111564	-0.0114579	0.0102781			-0.0504332	-0.0626729	0.0441173			-0.00147612	-0.00948668	0.00311817
-0.0918789	0.000663434	-0.00272248			2.57279	-0.278113	0.165483			1.7181	-0.218221	0.2127			1.46029	0.00904499	0.327398			0.701153	-0.00610447	0.0988106			0.424697	0.00546815	0.0673869			-0.0226469	0.0368303	0.0365272			-0.103972	-0.00591378	0.0109928			-0.0405576	-0.0613685	0.0433303			0.00663748	-0.00703317	0.00236415
-0.0903948	0.000619667	-0.00250728			2.59988	-0.27187	0.171378			1.67975	-0.213426	0.224026			1.49626	0.0143828	0.333122			0.72257	-0.00373253	0.10076			0.420071	0.00521203	0.0668642			0.00450913	0.036908	0.0376934			-0.0858128	-0.00650516	0.0115214			-0.0306738	-0.0628264	0.0422591			0.032326	-0.00609506	0.00179287
-0.0849696	-0.00285975	-0.00195664			2.56347	-0.267799	0.176355			1.6672	-0.209173	0.232445			1.45773	0.0163732	0.339725			0.715906	-0.00346899	0.105299			0.396557	0.00316304	0.0665852			-0.00442137	0.0393171	0.0382767			-0.0531161	-0.00983166	0.0118016			0.0154972	-0.0639773	0.0411876			0.0246228	-0.00825993	0.000790059
-0.0722348	-0.0042165	-0.00133967			2.55423	-0.264271	0.184325			1.6447	-0.200669	0.243969			1.4098	0.0198112	0.35255			0.665913	-0.0013606	0.106413			0.364228	0.00358991	0.0660691			-0.0170877	0.0347321	0.0385783			-0.0591209	-0.0124189	0.0119961			-0.0167676	-0.065205	0.0400304			0.0313036	-0.00443534	0.000199188
-0.0725634	-0.00141546	-0.000750115			2.50109	-0.263818	0.194046			1.62888	-0.195512	0.253914			1.40802	0.0247871	0.361575			0.653505	-0.00223909	0.108367			0.375363	0.00427291	0.065739			-0.00280139	0.0334887	0.0391378			-0.0361561	-0.00983165	0.0117441			-0.0467978	-0.063517	0.0387849			0.00907856	-0.00443533	-0.000166226
-0.07808	-0.00235644	-0.0004579			2.5134	-0.255224	0.198271			1.61048	-0.187551	0.263775			1.38364	0.0297631	0.372218			0.632703	-0.0011849	0.109236			0.377907	0.00171166	0.0660473			-0.00805951	0.0337995	0.0397759			-0.0337284	-0.00968381	0.0110386			-0.0556962	-0.0638239	0.0376249			-0.00541827	-0.00912587	-0.000674907
-0.0557751	-0.00441345	0.000138271			2.51551	-0.250971	0.20541			1.61161	-0.180403	0.272242			1.36257	0.0319344	0.385089			0.644774	0.00417393	0.109943			0.358269	0.000260287	0.0666212			-0.0307621	0.0337995	0.040092			-0.0342961	-0.0132321	0.0110097			-0.0695919	-0.0610616	0.0366199			-0.036179	-0.0115072	-0.00126276
-0.0512469	-0.00454475	0.000661012			2.50787	-0.243915	0.209445			1.58987	-0.175789	0.280974			1.36539	0.0408007	0.39683			0.64125	0.00294404	0.110765			0.34842	0.00188241	0.0663287			-0.0333514	0.0344989	0.0399736			-0.0474744	-0.0159672	0.0112328			-0.0628181	-0.0630566	0.0358907			-0.0297899	-0.0106413	-0.00164557
-0.0543389	-0.00423838	0.0016851			2.48944	-0.239662	0.215264			1.57219	-0.168551	0.289147			1.38115	0.051024	0.40671			0.678557	0.00329543	0.111846			0.367183	0.000345666	0.0654736			-0.0102408	0.0344989	0.0411189			-0.0462942	-0.0163368	0.0110607			-0.060516	-0.064361	0.0354815			-0.0123328	-0.00825993	-0.00192335
-0.0460933	-0.00620786	0.00246096			2.46598	-0.233058	0.218904			1.54731	-0.162942	0.29952			1.38536	0.0503002	0.419682			0.7163	0.00601878	0.117172			0.364272	-0.000508087	0.0631604			0.0131796	0.0300693	0.0416868			-0.0718153	-0.0176674	0.0110549			-0.0410198	-0.0640541	0.0346433			0.0324987	-0.0112907	-0.000926906
-0.0479234	-0.00436968	0.0026916			2.42645	-0.22763	0.228882			1.53093	-0.153624	0.30743			1.4123	0.0560904	0.431633			0.70709	0.00900566	0.121258			0.353474	8.95434e-05	0.0631037			-3.70887e-05	0.0320898	0.0411351			-0.0647807	-0.0174456	0.0103292			-0.0661649	-0.0592201	0.0334966			0.0474576	-0.0106413	-0.000851676
-0.036377	-0.000540138	0.00252917			2.36625	-0.222382	0.236813			1.54277	-0.147381	0.317028			1.39358	0.0670375	0.44094			0.717637	0.011114	0.123314			0.364305	0.00119941	0.0627892			0.0194097	0.0324784	0.0410519			-0.0684326	-0.0134538	0.0096867			-0.0456817	-0.0606013	0.0321385			0.0262636	-0.00991966	-0.00118886
-0.0319218	-0.00148111	0.00253182			2.34572	-0.208631	0.245957			1.51347	-0.141953	0.32705			1.41161	0.0753609	0.457928			0.72408	0.0133981	0.123572			0.345929	0.00111404	0.0620839			0.0360945	0.0360532	0.0406406			-0.0545002	-0.0135278	0.00913195			-0.0439853	-0.0614453	0.0308822			0.0488137	-0.0113629	-0.00113474
-0.0283623	-0.00283786	0.0024437			2.31981	-0.20465	0.252597			1.52268	-0.131729	0.340832			1.37321	0.0788894	0.472601			0.736065	0.0165607	0.124875			0.326688	0.00111404	0.0637066			0.0226597	0.0375297	0.0395069			-0.0279966	-0.0150062	0.0082833			-0.0576992	-0.0611384	0.0301185			0.0476803	-0.00955884	-0.00176083
-0.0174512	-0.000802735	0.00242573			2.29081	-0.19895	0.266233			1.47062	-0.127025	0.351264			1.34007	0.086489	0.483601			0.727959	0.0183177	0.126564			0.324081	0.00427291	0.0641876			-0.00354174	0.0356646	0.0387396			-0.017027	-0.0114579	0.00791294			-0.0351602	-0.0628264	0.0287374			0.0296245	-0.00140452	-0.0019393
-0.0136979	0.00134181	0.00248478			2.2818	-0.192436	0.273002			1.46461	-0.117978	0.368547			1.3278	0.0931839	0.492938			0.728725	0.0208654	0.130956			0.299355	0.00435829	0.0636153			-0.0251728	0.0369858	0.0387477			0.00951572	-0.00554417	0.00705652			-0.0407978	-0.06321	0.0275484			0.0452965	-0.00162101	-0.00250146
-0.0149779	0.000444603	0.00228725			2.27165	-0.187098	0.284696			1.44493	-0.108569	0.379296			1.31893	0.0978885	0.506104			0.762921	0.0255214	0.133212			0.289801	0.00128479	0.0633625			-0.0266379	0.0388509	0.0378345			-0.0186546	-0.00502671	0.00752518			-0.0313694	-0.0597572	0.0269163			0.0455619	-0.00219831	-0.00339061
-8.68701e-05	0.000597784	0.00273084			2.2631	-0.181218	0.295079			1.44411	-0.0998833	0.3904			1.29998	0.107207	0.518836			0.793468	0.0260485	0.136678			0.317161	0.00410217	0.0624544			-0.0160135	0.0386954	0.0380277			-0.0276742	-0.00362219	0.00722112			-0.013676	-0.0593736	0.0260417			0.0453312	-0.00147669	-0.00358119
-0.000490011	0.00022577	0.00326681			2.28254	-0.172894	0.308161			1.45448	-0.091198	0.404614			1.2964	0.118607	0.533649			0.81074	0.0320222	0.139888			0.313944	0.00435829	0.0627161			-0.029597	0.0395503	0.0379641			-0.0446571	-0.0026612	0.00712751			-0.0328741	-0.0612151	0.025232			0.0340792	0.000399534	-0.00374704
-0.00342813	-0.0025315	0.00306416			2.253	-0.166018	0.318897			1.43817	-0.0830555	0.410672			1.27896	0.123854	0.549422			0.827572	0.0314073	0.143439			0.345959	0.00128479	0.0637024			-0.0213898	0.0400943	0.0389472			-0.0144275	-0.0053224	0.00702196			-0.0467914	-0.0621358	0.0244009			0.015207	0.000399533	-0.00394918
0.0169223	-0.00415085	0.0033801			2.23388	-0.158961	0.327384			1.43318	-0.0687609	0.426208			1.26707	0.130368	0.559186			0.841871	0.0347456	0.148747			0.356884	0.000772538	0.0647624			-0.00903991	0.0366749	0.0407497			0.016436	-0.00754006	0.0067352			-0.0281205	-0.0638239	0.023649			0.0290873	-0.000755062	-0.00404254
0.0212571	-0.00388825	0.00401679			2.20039	-0.152447	0.338106			1.47883	-0.0571805	0.443749			1.23379	0.138872	0.574654			0.825478	0.0367661	0.15202			0.355577	0.00427292	0.0651258			0.0148961	0.0347321	0.0411071			0.0267907	-0.00746614	0.006576			-0.0219929	-0.0609849	0.0229952			0.0394695	0.000616017	-0.0042482
0.00691774	-0.00246585	0.00455738			2.20933	-0.144576	0.34877			1.45419	-0.045781	0.459524			1.23064	0.150996	0.582405			0.820609	0.0376446	0.155582			0.358003	0.00102866	0.0645688			-0.0288513	0.0338772	0.0416528			0.0005509	-0.00473102	0.00623176			-0.0423974	-0.0610616	0.0223957			0.0409157	-0.00313641	-0.00409936
0.0177828	-0.00500429	0.00503177			2.18434	-0.134534	0.359878			1.43402	-0.0331149	0.476752			1.22344	0.159952	0.594205			0.828996	0.0409829	0.16213			0.382112	-0.00247171	0.0644039			-0.0131587	0.0375297	0.0419073			-0.0100953	-0.0103491	0.00563317			-0.0548866	-0.0579157	0.0217957			0.0276246	-0.00696101	-0.00460792
0.01402	-0.00682059	0.00554375			2.15394	-0.123135	0.370113			1.43804	-0.0218964	0.490578			1.23455	0.167642	0.604891			0.80414	0.0420371	0.168479			0.347557	-0.000251956	0.0647765			-0.0306909	0.0365195	0.0414023			-0.0219341	-0.0146366	0.00479852			-0.0546476	-0.0579157	0.0213187			0.0242295	-0.00472398	-0.00407908
0.0289616	-0.00618598	0.00631553			2.1284	-0.114902	0.379453			1.46864	-0.00968271	0.50842			1.18638	0.182299	0.616775			0.794513	0.0431791	0.174152			0.387681	-0.000593458	0.0655159			-0.0220059	0.0337218	0.0410112			-0.0292095	-0.0148584	0.00446531			-0.0577513	-0.0615987	0.0208654			0.0254955	-0.00147668	-0.00382208
0.038451	-0.00671118	0.00706185			2.10905	-0.106035	0.394688			1.47393	0.00298337	0.523714			1.17927	0.191346	0.635484			0.795352	0.0443212	0.180244			0.398378	-0.00230096	0.0649361			-0.0462596	0.0332555	0.0407506			-0.0215054	-0.0137495	0.00488473			-0.0460822	-0.0608314	0.0215676			0.0301947	-0.00674452	-0.00321672
0.0385589	-0.00546384	0.0073858			2.07163	-0.0953597	0.405945			1.4478	0.0160113	0.542879			1.16707	0.199036	0.648561			0.794081	0.0469567	0.186414			0.389124	-0.00247171	0.0652071			-0.0477942	0.0316235	0.0400629			-0.0360414	-0.0136017	0.00589231			-0.0284024	-0.0559975	0.021875			0.0444432	-0.00696101	-0.0029149
0.0297197	-0.00347248	0.00775274			2.03182	-0.0834174	0.41793			1.40509	0.0276822	0.56399			1.16607	0.213783	0.66361			0.795001	0.0517006	0.191722			0.404394	0.00213854	0.0650957			-0.0577994	0.0340327	0.0398132			-0.0299559	-0.0110883	0.0056642			-0.0282959	-0.0557673	0.0216994			0.0145412	-0.00645587	-0.00271631
0.0142106	-0.00356001	0.00829937			2.02432	-0.0712037	0.428101			1.40622	0.0390817	0.577993			1.19133	0.227535	0.675549			0.799358	0.053809	0.201214			0.410148	0.00205316	0.066154			-0.0684763	0.0383069	0.0401005			-0.0290563	-0.00983166	0.00557724			-0.013391	-0.0582226	0.0215158			0.010939	-0.0027756	-0.00244307
0.0283842	-0.00574832	0.00880977			2.01429	-0.0597137	0.437899			1.42395	0.0555476	0.593921			1.19936	0.239025	0.691112			0.784392	0.05785	0.209548			0.413863	-0.000422706	0.066823			-0.0810101	0.0365972	0.0403037			-0.0106289	-0.00857498	0.00588462			-0.0227044	-0.059527	0.0208969			0.00688885	-0.00241479	-0.00251839
0.0291028	-0.00535442	0.00969471			2.01365	-0.0485857	0.45086			1.38771	0.0674899	0.608527			1.22104	0.247529	0.70835			0.797353	0.0608369	0.21825			0.437351	0.00444366	0.0670771			-0.0631441	0.0365195	0.0393941			-0.0163414	-0.00776183	0.00572699			-0.0361586	-0.0581459	0.0203818			-0.0191593	0.00191494	-0.00248931
0.0206424	-0.00224702	0.0108103			1.9524	-0.0415288	0.462029			1.35447	0.0808797	0.626097			1.22786	0.260919	0.72095			0.816151	0.0634724	0.226424			0.465284	0.00563891	0.06709			-0.0509387	0.0339549	0.0402914			-0.0158001	-0.00162629	0.0050209			-0.0334674	-0.0594503	0.0194087			-0.0235746	0.0014098	-0.00279376
0.0245387	-0.00213761	0.0117208			1.92203	-0.0275962	0.473601			1.35198	0.0987027	0.650304			1.21684	0.271323	0.734153			0.801576	0.0682163	0.235734			0.425834	0.00137017	0.0682497			-0.0498285	0.0372189	0.0406162			-0.00025026	0.00155237	0.00448359			-0.00238877	-0.0573786	0.018712			-0.00970514	0.00104899	-0.00264141
0.0331679	-0.00443533	0.0125313			1.89095	-0.0148396	0.481533			1.32791	0.112816	0.662468			1.20649	0.284894	0.750731			0.813799	0.0741901	0.238726			0.424618	0.00290691	0.0719463			-0.0792416	0.0409491	0.0400843			-0.0101294	-0.000665301	0.00467115			0.0021095	-0.0565346	0.0184521			-0.00185878	-0.000322089	-0.00264955
0.037637	-0.00443533	0.0132207			1.89146	-0.0051591	0.489902			1.3073	0.127835	0.690906			1.19851	0.300455	0.764399			0.800828	0.0773526	0.247223			0.416787	0.00615116	0.0739569			-0.0698872	0.0393949	0.0404405			0.00030284	-0.00354827	0.00465955			0.0237091	-0.0580692	0.0183373			0.0141427	0.00451278	-0.00307145
0.0327499	-0.00542007	0.013526			1.90354	0.00660225	0.500508			1.27313	0.144572	0.712325			1.18136	0.314659	0.780667			0.800239	0.078319	0.252823			0.389525	0.00341916	0.0758902			-0.0686743	0.0376852	0.0397442			-0.00794279	-0.00251336	0.00427077			0.0261151	-0.0576088	0.0174419			0.0078973	0.00480142	-0.00337347
0.020789	-0.00819923	0.0139037			1.89879	0.0183636	0.509662			1.26123	0.164114	0.733909			1.18389	0.324159	0.795203			0.814428	0.0816573	0.256663			0.367703	4.16245e-06	0.0771608			-0.0821342	0.0356646	0.0389977			0.00574294	-0.00317865	0.00385123			0.0250205	-0.0585296	0.0166422			-0.0114505	0.000832508	-0.00401729
0.0107137	-0.0090089	0.0140604			1.87464	0.0328391	0.526081			1.25141	0.183023	0.749351			1.17402	0.335377	0.809651			0.801149	0.085347	0.262181			0.365241	0.00282153	0.0775607			-0.0968199	0.0337995	0.0388149			0.00481127	-0.00569201	0.0037164			0.0113663	-0.055844	0.0162937			-0.0230439	0.00148197	-0.00417052
0.0162089	-0.00754274	0.0145332			1.83203	0.0436053	0.53906			1.24921	0.199127	0.767096			1.16683	0.355191	0.821401			0.779338	0.0871918	0.270272			0.352027	0.00196779	0.0787804			-0.0822727	0.0344212	0.0387915			0.0160673	-0.0039918	0.00422819			0.00495426	-0.0573019	0.0155367			-0.0320917	-0.000177762	-0.00501777
0.0145388	-0.0101468	0.0147477			1.84199	0.0587141	0.551208			1.23328	0.216497	0.783359			1.14483	0.371204	0.838444			0.788088	0.0943076	0.278731			0.329504	8.95394e-05	0.0814491			-0.0675746	0.0358978	0.0385546			0.00705802	-0.00443533	0.00418689			0.00183048	-0.0553069	0.0144786			-0.0280321	-0.00241479	-0.00600829
0.0165126	-0.0131886	0.0147283			1.82488	0.0764466	0.566574			1.19463	0.235949	0.800742			1.15761	0.383418	0.848325			0.839841	0.0948347	0.289532			0.344568	0.00111404	0.084831			-0.0324985	0.0346544	0.0390162			0.0108415	-0.0127146	0.00356213			0.0100091	-0.0547698	0.0138397			-0.0102889	-0.00486831	-0.00633933
0.0137181	-0.0117224	0.0147927			1.8015	0.0892032	0.577998			1.21498	0.254043	0.818046			1.1402	0.400879	0.861114			0.853537	0.0982608	0.296395			0.332922	0.00316304	0.0879265			-0.0757898	0.0299916	0.0393788			0.011613	-0.0129364	0.00388719			0.0101623	-0.0568415	0.0132661			0.000459288	-0.0018375	-0.00661194
0.00599044	-0.00973105	0.0147127			1.76914	0.102412	0.591848			1.1838	0.273133	0.840081			1.12903	0.416078	0.875884			0.869613	0.101951	0.303045			0.342187	0.00034566	0.0891814			-0.0613712	0.0289036	0.0400944			0.00953584	-0.00820536	0.00432115			-0.0084806	-0.0575321	0.0129974			-0.00549307	-0.0033529	-0.00699261
0.00321457	-0.00968728	0.0149318			1.73626	0.122044	0.610032			1.17278	0.296836	0.853506			1.13282	0.430554	0.891947			0.856774	0.108539	0.308846			0.324668	0.00119941	0.0906221			-0.0399023	0.0302247	0.040293			0.0375151	-0.00768791	0.00442111			-0.0143189	-0.0536956	0.012978			0.00747431	-0.00739398	-0.00792305
0.0154143	-0.0103657	0.0149581			1.72432	0.139687	0.625297			1.16345	0.313212	0.873946			1.13989	0.447925	0.906622			0.839595	0.115304	0.312164			0.342561	0.00427291	0.0922948			-0.0407201	0.0344212	0.0409266			0.0601626	-0.00953596	0.00459759			-0.0186438	-0.0536956	0.0123658			0.0109192	-0.00537344	-0.00858066
0.0169291	-0.00778345	0.0154858			1.73238	0.154524	0.639341			1.17847	0.331759	0.889347			1.11891	0.469095	0.917879			0.819031	0.117939	0.316432			0.337497	0.00657804	0.0961857			-0.0382776	0.0344212	0.0426645			0.0811409	-0.00635731	0.00520524			-0.0115861	-0.0559975	0.0113598			0.0103183	-0.00198182	-0.00883661
0.0159784	-0.00872442	0.0158778			1.72682	0.169904	0.658216			1.16844	0.3532	0.904461			1.08222	0.485289	0.931351			0.780428	0.123913	0.326656			0.374831	0.00435829	0.0987455			-0.0342075	0.0343435	0.0442789			0.116622	-0.00384396	0.00562078			-0.0189574	-0.0565346	0.010309			0.00812339	-0.000610733	-0.00932787
0.0107439	-0.0103438	0.016072			1.72574	0.185465	0.675136			1.1421	0.374642	0.925007			1.04667	0.497413	0.946907			0.774169	0.130414	0.333387			0.409223	0.00794403	0.100556			-0.0226268	0.0347321	0.0467977			0.126867	-0.00413964	0.00562807			-0.0222424	-0.056688	0.00974184			0.0256023	0.00119332	-0.00949264
0.0200487	-0.00666741	0.0164284			1.72436	0.200212	0.690659			1.12627	0.398074	0.939455			1.0389	0.515869	0.965508			0.768438	0.135333	0.3405			0.392257	0.00956616	0.101509			-0.0155012	0.0338772	0.0486756			0.133516	0.000887069	0.00561972			0.0054879	-0.0560742	0.00921446			0.027775	0.0019871	-0.00948119
0.014278	-0.00550761	0.0168222			1.70191	0.215593	0.714803			1.12029	0.417526	0.955305			1.01362	0.535954	0.984297			0.737062	0.143064	0.343611			0.399473	0.00743178	0.102501			-0.0302185	0.0346544	0.0513128			0.136864	0.00510063	0.00537208			-0.0121802	-0.0547698	0.00843325			0.0108904	0.00343035	-0.0089853
-0.0028881	-0.00819923	0.0170851			1.69172	0.235677	0.73071			1.08056	0.441139	0.967768			1.00634	0.550791	0.996714			0.730967	0.150444	0.348759			0.392318	0.00768791	0.103524			-0.000315449	0.0368303	0.0517222			0.127995	0.0013306	0.00505221			-0.0371597	-0.0540792	0.00783251			0.00640963	0.0019871	-0.00843245
0.011031	-0.0105626	0.0171113			1.65933	0.252867	0.752551			1.05554	0.462038	0.981662			1.00038	0.5697	1.01486			0.713252	0.157911	0.35016			0.420883	0.00794404	0.107621			-0.0197981	0.0382292	0.0510618			0.121317	-0.00317865	0.00541645			-0.0599297	-0.0576855	0.00699413			-0.0127347	0.00270872	-0.00819887
0.0178669	-0.0101906	0.0170794			1.60858	0.265804	0.770561			1.06634	0.487008	1.0007			0.985076	0.588608	1.03248			0.717874	0.161249	0.353656			0.415065	0.00990766	0.110354			-0.0347937	0.0324784	0.0518495			0.110306	-0.00125668	0.0049086			-0.0680757	-0.0579157	0.00644822			-0.0172299	0.00559521	-0.00747802
0.025645	-0.0101906	0.0173206			1.61592	0.284804	0.791099			1.05339	0.513426	1.02408			0.98502	0.605617	1.05127			0.746132	0.166784	0.364559			0.454787	0.00666342	0.114335			-0.0406491	0.0321675	0.0520169			0.120315	-0.000960992	0.00517191			-0.0655772	-0.0569182	0.00576594			0.00185734	0.00270872	-0.00666226
0.0140152	-0.0128603	0.0177124			1.59598	0.306517	0.813581			1.047	0.535411	1.04212			0.967977	0.619821	1.06871			0.748397	0.17346	0.369706			0.448766	0.00683416	0.117851			-0.044177	0.0303801	0.0518893			0.123891	-0.00391788	0.0052699			-0.0707061	-0.0543094	0.00492902			0.0223086	-0.00371371	-0.006038
0.0230926	-0.012182	0.0178687			1.57019	0.323435	0.830285			1.0166	0.563548	1.06507			0.928445	0.641444	1.08655			0.758806	0.17838	0.378147			0.474808	0.00922466	0.121682			-0.0649717	0.0310018	0.0513326			0.138967	-0.00539632	0.0049247			-0.0523275	-0.0551535	0.00454256			0.0228595	-0.00342506	-0.00410677
0.0377161	-0.0124664	0.0178694			1.54974	0.342796	0.84948			0.976541	0.584175	1.07959			0.916428	0.666957	1.09509			0.799376	0.185144	0.389646			0.45965	0.00743179	0.126103			-0.0750288	0.0325561	0.0508422			0.136254	-0.00620946	0.00423676			-0.0437382	-0.0543094	0.00481335			0.0165672	-0.00263127	-0.00288187
0.0419233	-0.0142827	0.0179327			1.56784	0.363967	0.865934			0.974274	0.612041	1.10895			0.920854	0.681161	1.10925			0.769115	0.191909	0.398865			0.466029	0.00743179	0.133749			-0.0649308	0.0300693	0.0506578			0.153448	-0.00990558	0.00413438			-0.0359104	-0.0572252	0.00549068			0.046813	-0.0054456	-0.00194703
0.038309	-0.0155957	0.0176672			1.55452	0.383689	0.881036			0.95914	0.638097	1.12577			0.872255	0.699346	1.1227			0.756474	0.198761	0.405665			0.461836	0.0128104	0.138767			-0.0880544	0.0272716	0.0518502			0.121723	-0.0107926	0.00374272			-0.0463192	-0.0544629	0.00647393			0.0733572	-0.00486831	-0.00072658
0.050633	-0.0111753	0.017402			1.50137	0.40305	0.896074			0.932844	0.662343	1.13941			0.845108	0.722145	1.13773			0.768957	0.204998	0.413941			0.470666	0.0112737	0.143518			-0.088075	0.0268053	0.0517436			0.1473	-0.00776183	0.00333628			-0.0497228	-0.0543094	0.00737828			0.0803566	-0.00631155	0.00106635
0.0524573	-0.00955598	0.0169115			1.47652	0.427206	0.90823			0.910041	0.690842	1.15783			0.862542	0.74223	1.15569			0.738024	0.211148	0.419826			0.436104	0.0108468	0.144859			-0.0960543	0.028515	0.0519502			0.131928	-0.00628338	0.00282685			-0.064937	-0.0536189	0.00913112			0.0938587	-0.00898155	0.00223539
0.0612065	-0.0126853	0.016464			1.45546	0.451634	0.927916			0.887134	0.714274	1.17682			0.861768	0.762586	1.17293			0.765806	0.221075	0.430052			0.462959	0.0141764	0.14916			-0.110832	0.0313904	0.052162			0.152898	-0.00850106	0.00233562			-0.0909637	-0.0539258	0.00973783			0.0606946	-0.00927019	0.00288335
0.0507598	-0.0106064	0.015968			1.40794	0.469819	0.945591			0.884511	0.743044	1.19948			0.869035	0.785385	1.1918			0.778998	0.229332	0.439762			0.453995	0.016823	0.153767			-0.117269	0.0316235	0.0522842			0.164018	-0.0046571	0.00221102			-0.0886393	-0.0547698	0.00988207			0.0851573	-0.00212614	0.00350928
0.0466995	-0.00791475	0.0154793			1.39645	0.492527	0.959971			0.918597	0.768738	1.21518			0.87899	0.806013	1.19944			0.766309	0.234252	0.453954			0.445872	0.0185305	0.161547			-0.126875	0.0303024	0.0537946			0.135885	-0.00436141	0.00137837			-0.0894217	-0.056688	0.0111697			0.0869598	-0.000105599	0.00369598
0.0483112	-0.00909644	0.0149172			1.39762	0.513607	0.981001			0.889175	0.793799	1.23045			0.88751	0.820669	1.21414			0.791566	0.243388	0.470666			0.43406	0.0179329	0.166576			-0.135235	0.0300693	0.0532181			0.13668	-0.00273512	0.00107864			-0.0696318	-0.0588365	0.0126873			0.0808567	-0.0033529	0.00384362
0.0544225	-0.00846183	0.0143877			1.40441	0.534597	0.995047			0.846298	0.824469	1.24592			0.874535	0.839306	1.23348			0.787868	0.25437	0.477129			0.404398	0.0221163	0.173301			-0.147536	0.0297584	0.0542982			0.129201	-3.03532e-09	0.00140467			-0.060893	-0.0575321	0.0126963			0.0540129	-0.00320857	0.00472648
0.0437052	-0.00559514	0.013892			1.38686	0.555767	1.01062			0.843333	0.85152	1.26551			0.886121	0.867081	1.26039			0.792014	0.264999	0.485829			0.412265	0.0244214	0.181894			-0.148808	0.0326338	0.0546796			0.105537	0.00495279	0.00167305			-0.0773436	-0.0565346	0.0127078			0.045671	-0.00140452	0.00523404
0.0348393	-0.00701754	0.0138923			1.35896	0.580647	1.02454			0.811526	0.878843	1.29236			0.883665	0.887528	1.2864			0.781788	0.272906	0.493314			0.399997	0.0239945	0.184793			-0.122936	0.0334887	0.0542625			0.104817	0.0046571	0.0025327			-0.0561976	-0.055844	0.0145011			0.033614	0.000543856	0.00641002
0.0324522	-0.0103875	0.0135537			1.33743	0.602089	1.04409			0.798337	0.907884	1.30916			0.882938	0.906165	1.29957			0.761567	0.283096	0.50533			0.414476	0.0258728	0.187039			-0.106871	0.0335664	0.0544628			0.0972917	-0.00229159	0.00223746			-0.0653068	-0.0609849	0.017176			0.0392594	0.000183045	0.00731093
0.0225308	-0.0102125	0.0132127			1.32712	0.623531	1.06274			0.763615	0.938645	1.32748			0.894497	0.925707	1.32233			0.790481	0.288455	0.514723			0.404366	0.0279218	0.19394			-0.117535	0.0292144	0.0534818			0.104749	-0.00303081	0.00249344			-0.0692602	-0.0591434	0.018576			0.0145335	-0.00111588	0.00813114
0.0234528	-0.00828676	0.0131294			1.30313	0.644882	1.07415			0.766386	0.968772	1.34319			0.906066	0.946516	1.34606			0.802842	0.294429	0.524591			0.410922	0.0293732	0.197059			-0.134633	0.0280487	0.0533996			0.119937	0.000369609	0.00328437			-0.0683188	-0.059834	0.019274			0.0498547	-0.00219831	0.00907459
0.0241206	-0.00929338	0.0131915			1.30599	0.674195	1.09216			0.744801	0.998537	1.35871			0.90591	0.967505	1.36926			0.808526	0.30462	0.533201			0.406321	0.0272388	0.206261			-0.134738	0.0278156	0.0535659			0.103266	-0.0046571	0.00402538			-0.040409	-0.0588365	0.0206718			0.0524653	-0.00710534	0.00934756
0.0189532	-0.0110878	0.0131847			1.29477	0.695546	1.11097			0.745258	1.02875	1.37858			0.90205	0.987771	1.38291			0.806042	0.314019	0.540224			0.429247	0.0289463	0.211524			-0.14698	0.0269608	0.0538768			0.138408	-0.00702261	0.00422191			-0.0392365	-0.0570717	0.022313			0.0472835	-0.00941452	0.0101433
0.0272968	-0.0107596	0.0133629			1.25404	0.722778	1.14401			0.748876	1.05617	1.40022			0.87739	1.015	1.39817			0.778172	0.32298	0.546819			0.432287	0.0308245	0.218897			-0.144809	0.0261836	0.0542531			0.126365	-0.00717045	0.00449253			-0.0439723	-0.0592968	0.0226468			0.0451221	-0.00652804	0.0111025
0.0364146	-0.00999365	0.0138177			1.24462	0.749649	1.16053			0.714459	1.08512	1.42459			0.87481	1.03626	1.41161			0.799383	0.328163	0.55582			0.436893	0.0333858	0.222933			-0.13265	0.0260282	0.0544246			0.126332	-0.00894458	0.00485554			-0.0532333	-0.0596038	0.022558			0.0804943	-0.00732182	0.011258
0.0273031	-0.0120069	0.0137049			1.2279	0.774709	1.17451			0.690894	1.11787	1.44223			0.865313	1.05192	1.42745			0.78959	0.338793	0.570845			0.459731	0.0361178	0.228235			-0.135168	0.0240854	0.0542323			0.113493	-0.0129364	0.00488257			-0.0452874	-0.0592201	0.0229827			0.0660342	-0.0113629	0.0116129
0.0377842	-0.0078491	0.014162			1.2188	0.799046	1.19934			0.679589	1.14773	1.45524			0.864197	1.07806	1.45061			0.831502	0.347842	0.581346			0.477694	0.0389352	0.233595			-0.130093	0.0225311	0.0545689			0.10586	-0.00960989	0.00488348			-0.0179258	-0.0553069	0.0238433			0.0550793	-0.010497	0.0118755
0.0373588	-0.00526689	0.0145525			1.22696	0.827907	1.2161			0.639316	1.17423	1.47471			0.868267	1.10267	1.46543			0.835705	0.357241	0.596591			0.474596	0.0443138	0.23665			-0.114138	0.0250956	0.0541544			0.0876599	-0.00657907	0.00481521			-0.0279686	-0.0585296	0.0245718			0.0723445	-0.0112186	0.0123114
0.0403192	-0.00627352	0.0152012			1.27803	0.859663	1.23718			0.613518	1.20264	1.50483			0.845107	1.12411	1.48175			0.84398	0.368311	0.608263			0.448364	0.0450821	0.24118			-0.122722	0.0283596	0.0544511			0.0779504	-0.00835321	0.00480018			0.0047442	-0.0579157	0.0245123			0.0415415	-0.0104248	0.0124296
0.0467353	-0.0079804	0.0159098			1.26306	0.882461	1.26018			0.594836	1.2353	1.52372			0.846944	1.14474	1.49613			0.853577	0.378677	0.620102			0.473974	0.0501193	0.244178			-0.115679	0.0266499	0.0554665			0.0747968	-0.00783575	0.00580146			-0.00446701	-0.0600641	0.0245167			0.0346477	-0.00761047	0.0119697
0.0354971	-0.00406332	0.0166352			1.23538	0.906437	1.27874			0.573065	1.26308	1.54149			0.813394	1.16763	1.51257			0.863954	0.38588	0.633272			0.455474	0.0566078	0.247807			-0.115954	0.0250179	0.0555369			0.0719347	-0.0046571	0.00652593			-0.0132364	-0.059834	0.0242344			0.0450224	-0.00190966	0.0116762
0.0364449	-0.00205008	0.016873			1.21693	0.934211	1.29444			0.561603	1.29293	1.5591			0.76752	1.18799	1.52764			0.852309	0.398443	0.636401			0.51699	0.0585714	0.255424			-0.135857	0.0266499	0.0563676			0.0463959	-0.000887067	0.00686614			-0.0280525	-0.0604478	0.023908			0.0250905	-0.00486831	0.0108235
0.0320581	-0.00323176	0.0169367			1.2065	0.962077	1.31605			0.564413	1.3255	1.5744			0.728239	1.20626	1.53878			0.845608	0.410566	0.646981			0.496062	0.0604496	0.264515			-0.133824	0.0276602	0.0566428			0.028619	-0.000221765	0.00686778			-0.0238248	-0.0593736	0.0231864			0.0437135	-0.00854858	0.0098567
0.030658	-0.00169994	0.0171211			1.17659	0.989218	1.33459			0.563482	1.35319	1.59215			0.727512	1.22996	1.55323			0.8072	0.423744	0.656891			0.485448	0.067365	0.271079			-0.12923	0.0280487	0.0566591			0.0171194	0.000960988	0.0075123			-0.0427003	-0.060678	0.0225931			0.0512657	-0.00494047	0.00944203
0.0375116	-0.0012404	0.0170592			1.1652	1.01564	1.35504			0.559783	1.38187	1.61373			0.745171	1.25493	1.56666			0.79461	0.433144	0.667826			0.482836	0.071463	0.278148			-0.111296	0.0289036	0.0569969			-0.00187111	0.000295689	0.00828919			-0.0327899	-0.0609849	0.0233057			0.050102	-0.000682904	0.00912639
0.0273779	-0.004873	0.0168342			1.11812	1.04142	1.37365			0.549103	1.41389	1.63752			0.751415	1.27348	1.57786			0.782253	0.442368	0.67834			0.476978	0.0718899	0.283571			-0.128936	0.0286705	0.0564215			0.00202344	-0.000665302	0.0090425			-0.0404217	-0.0632868	0.0236387			0.0391602	-0.0045075	0.0090248
0.0355609	-0.00520124	0.0164824			1.09927	1.06748	1.38982			0.518944	1.44854	1.6605			0.764917	1.29375	1.60179			0.772072	0.454667	0.688537			0.45436	0.074878	0.291564			-0.157565	0.0229974	0.056028			0.0198124	-0.00369611	0.00939156			-0.0332243	-0.0620591	0.0235117			0.0314954	-0.00342506	0.00879544
0.0369561	-0.00428215	0.0162981			1.09702	1.09398	1.40684			0.508	1.47921	1.67635			0.734393	1.31637	1.61873			0.720032	0.460904	0.704173			0.456142	0.0831594	0.296914			-0.149161	0.0226865	0.0573244			0.030125	-0.00280905	0.00965524			-0.0430772	-0.0613685	0.0234338			0.0192451	-0.00558993	0.00830807
0.0509032	-0.00395391	0.0161638			1.06577	1.12493	1.42043			0.506612	1.50898	1.7035			0.720232	1.33916	1.64295			0.705302	0.473115	0.71069			0.4528	0.082391	0.303852			-0.137015	0.0240854	0.0588001			0.0421392	-0.00347434	0.0100261			-0.0383354	-0.0631333	0.0245867			0.0478562	-0.00890939	0.00817949
0.0450107	-0.00539819	0.0160857			1.05869	1.15361	1.44345			0.535972	1.53739	1.7233			0.694896	1.36033	1.6667			0.688056	0.486117	0.719368			0.434709	0.0856353	0.314405			-0.118254	0.0226865	0.0595106			0.0428373	-0.00901851	0.0109502			-0.0604361	-0.0596805	0.0256309			0.0583749	-0.0119402	0.00799019
0.0521902	-0.00701754	0.0157955			1.06467	1.18174	1.47181			0.516322	1.56688	1.73498			0.693734	1.38368	1.68357			0.689317	0.496044	0.729728			0.447227	0.0935751	0.322832			-0.123869	0.0238522	0.0601727			0.0337478	-0.0110144	0.0110075			-0.0775471	-0.0614453	0.0260241			0.0504097	-0.0086929	0.00812284
0.0669005	-0.00404144	0.0152182			1.04988	1.21087	1.49851			0.506414	1.59619	1.74592			0.680155	1.4091	1.68899			0.712157	0.502808	0.742816			0.466148	0.0954534	0.329697			-0.10368	0.0191895	0.0600118			0.0330359	-0.0119754	0.0113367			-0.108394	-0.0617522	0.0257804			0.0702579	-0.00977533	0.0074972
0.0700168	-0.00454475	0.0146855			1.05767	1.24019	1.52117			0.532688	1.62858	1.77027			0.646128	1.42457	1.70027			0.699623	0.515283	0.754942			0.475069	0.0993806	0.337939			-0.086129	0.0193449	0.0599376			0.0380741	-0.0107926	0.0118091			-0.106704	-0.0606013	0.02529			0.0862259	-0.0144659	0.00664364
0.080042	-0.00307858	0.0138872			1.03138	1.27059	1.53949			0.525665	1.65889	1.80132			0.6326	1.44601	1.71437			0.678024	0.52846	0.766439			0.482568	0.105442	0.344581			-0.0913468	0.0212877	0.0599761			0.0462673	-0.0118276	0.0125011			-0.0885991	-0.0570717	0.0253235			0.105198	-0.0137443	0.00651217
0.0709863	0.000685313	0.013272			1.01145	1.29972	1.5537			0.490083	1.68486	1.82035			0.622252	1.47451	1.72742			0.669738	0.540847	0.779553			0.472851	0.115175	0.349166			-0.0880102	0.0223757	0.0605382			0.0352425	-0.00975773	0.0134267			-0.0763503	-0.0592968	0.0249746			0.0892607	-0.0133113	0.00659726
0.0623604	0.000794729	0.0126427			0.987666	1.32894	1.56666			0.461584	1.71137	1.84235			0.605314	1.49686	1.73732			0.680225	0.55095	0.793757			0.497574	0.121151	0.352882			-0.0794754	0.0256396	0.0607913			0.0522403	-0.00805752	0.0138167			-0.0860605	-0.0624428	0.0245239			0.054922	-0.010497	0.00645239
0.0490793	-0.000583907	0.0118253			0.961864	1.35862	1.58486			0.450271	1.74303	1.85847			0.588664	1.51396	1.75661			0.650169	0.565006	0.812349			0.511934	0.125505	0.359684			-0.0719752	0.0236968	0.0621457			0.0834113	-0.00776183	0.0138199			-0.101871	-0.0611384	0.0242887			0.046815	-0.00999182	0.00622981
0.0459363	0.00118863	0.0110881			0.946422	1.38377	1.60109			0.457707	1.77099	1.87773			0.567819	1.53585	1.77061			0.643879	0.578183	0.825478			0.510814	0.134726	0.361484			-0.0455992	0.0230751	0.061536			0.097918	-0.00872282	0.0138101			-0.0955474	-0.0599107	0.0245096			0.0327732	-0.00472398	0.00629484
0.0458018	0.00484311	0.0105216			0.940514	1.41245	1.61947			0.415248	1.80021	1.89942			0.562445	1.55593	1.79552			0.659635	0.588374	0.8387			0.499435	0.140702	0.368891			-0.0451523	0.0222203	0.0616012			0.108144	-0.00110883	0.0135462			-0.0819681	-0.0619057	0.0244159			0.0516087	-0.0050848	0.00664469
0.0555862	0.00429603	0.00979027			0.932826	1.44275	1.63582			0.420803	1.82871	1.90697			0.549725	1.57511	1.81718			0.67632	0.607261	0.853561			0.49286	0.144202	0.377067			-0.0542617	0.0257174	0.0612285			0.0942683	0.00125667	0.0136061			-0.0813927	-0.0579925	0.0247742			0.0381847	-0.00623939	0.0065208
0.0518955	0.00245785	0.00900772			0.928245	1.47324	1.65263			0.420652	1.85712	1.91413			0.565114	1.59719	1.83593			0.65636	0.619033	0.866921			0.489427	0.152398	0.383326			-0.0450186	0.0268831	0.0607137			0.0908489	-0.00251336	0.0134192			-0.0654353	-0.0619824	0.0245294			0.0519029	-0.00638371	0.00679753
0.0387817	0.00309246	0.00858645			0.954993	1.49767	1.67413			0.41618	1.88625	1.92478			0.536532	1.61981	1.84369			0.655092	0.631069	0.878217			0.470006	0.159655	0.392946			-0.0375484	0.0251734	0.0616921			0.105705	-0.00362219	0.0136325			-0.0900151	-0.0629799	0.02458			0.0468511	-0.000827223	0.00703408
0.039782	0.00289551	0.00803679			0.955388	1.52373	1.69449			0.404272	1.91647	1.94068			0.508073	1.6398	1.85051			0.63397	0.641347	0.883106			0.486094	0.164009	0.400243			-0.0516604	0.0238522	0.0622092			0.0836581	-0.00347435	0.0135644			-0.0858036	-0.063517	0.0239201			0.0387828	-0.00342506	0.00736796
0.0330753	0.000619665	0.00770947			0.947283	1.5525	1.71755			0.39344	1.94813	1.9528			0.522667	1.65473	1.86877			0.623458	0.656194	0.89836			0.478737	0.169559	0.406984			-0.0456996	0.0216763	0.0621073			0.0942502	-0.00561809	0.0133813			-0.0872104	-0.0609849	0.0229503			0.0305067	-0.00551777	0.00778198
0.026097	0.00175759	0.00735593			0.918741	1.58199	1.73786			0.371546	1.975	1.98051			0.525189	1.67653	1.88255			0.590433	0.668493	0.912617			0.501492	0.178865	0.414512			-0.0466441	0.0210546	0.0618225			0.0953735	-0.00872282	0.013041			-0.0739967	-0.0605245	0.023085			0.0548517	-0.00558993	0.0082364
0.0287677	0.00300492	0.00704325			0.928697	1.6104	1.75367			0.346604	2.00296	2.00577			0.512545	1.69942	1.89086			0.577838	0.67921	0.923919			0.515366	0.185865	0.420122			-0.0360366	0.0226088	0.0623694			0.100142	-0.0046571	0.0128783			-0.0883199	-0.0619824	0.0239142			0.0644828	-0.00898155	0.00870355
0.0289959	0.000313301	0.00649665			0.902162	1.63989	1.76695			0.329847	2.03019	2.01274			0.504383	1.72105	1.91409			0.565024	0.693003	0.938035			0.503275	0.188597	0.425464			-0.0286117	0.0229197	0.0629981			0.0979114	-0.00813144	0.0130021			-0.120146	-0.0582226	0.0235935			0.0635242	-0.00905371	0.00849336
0.0279701	-0.00106533	0.00582334			0.872095	1.66875	1.78759			0.32712	2.05905	2.0333			0.500337	1.73815	1.9364			0.590307	0.707586	0.946821			0.481496	0.198672	0.43088			-0.0481407	0.0223757	0.0627139			0.0910398	-0.014267	0.0129967			-0.10266	-0.0586063	0.0232573			0.0550024	-0.00753831	0.00778482
0.0307482	0.00164817	0.00543072			0.876453	1.69499	1.80329			0.356625	2.08501	2.04247			0.529003	1.75977	1.95973			0.563917	0.717952	0.960447			0.53227	0.203965	0.433059			-0.0676259	0.0182569	0.0636339			0.105767	-0.0139713	0.0127896			-0.0731447	-0.0588365	0.0238486			0.0645701	-0.00703317	0.00757606
0.0296819	0.00326752	0.00500772			0.859832	1.72467	1.82465			0.359665	2.11143	2.05706			0.511139	1.77922	1.97593			0.588089	0.73069	0.967113			0.535051	0.2096	0.43782			-0.067635	0.0202774	0.0639126			0.101574	-0.00960989	0.0128842			-0.0431449	-0.0582226	0.024507			0.0592995	-0.0106413	0.00800108
0.039548	0.00272044	0.00473301			0.818246	1.75723	1.84093			0.387685	2.13885	2.06779			0.498284	1.79768	1.98591			0.607237	0.746767	0.976303			0.523953	0.219589	0.442176			-0.027451	0.0218317	0.0633585			0.0968021	-0.0121972	0.0130873			-0.0367651	-0.0540793	0.0249473			0.0520004	-0.0121567	0.00811161
0.0493354	0.00324564	0.00421801			0.819799	1.78338	1.85898			0.378525	2.16038	2.08283			0.524427	1.81848	1.99473			0.594808	0.76091	0.988041			0.541556	0.227955	0.450279			-0.00832702	0.0255619	0.0649266			0.0907645	-0.0119015	0.0129106			-0.0337389	-0.0554604	0.0251142			0.0285943	-0.00963101	0.00733472
0.0478141	0.00633116	0.00364666			0.831216	1.81315	1.87154			0.391254	2.18788	2.0958			0.517893	1.84201	2.00072			0.590705	0.773912	1.00616			0.524402	0.239225	0.459711			0.000677206	0.0245517	0.0655945			0.0689665	-0.00909243	0.0124263			-0.0226299	-0.056995	0.025897			0.043109	-0.00479614	0.0068531
0.0477124	0.00547772	0.00316587			0.784116	1.83893	1.89079			0.398729	2.21258	2.11163			0.496615	1.85703	2.01184			0.600749	0.785948	1.02061			0.532017	0.243067	0.46542			-0.019282	0.0240854	0.0652544			0.0609404	-0.00857498	0.0119099			-0.0226606	-0.0556906	0.0262045			0.0494986	-0.00320858	0.0065069
0.0422705	0.00405531	0.00282165			0.745556	1.86734	1.90926			0.381247	2.23864	2.13539			0.494364	1.87023	2.02033			0.571905	0.80176	1.03036			0.565477	0.255019	0.471396			0.0240819	0.0253288	0.0648444			0.0879026	-0.00842713	0.0116799			-0.0298943	-0.0566881	0.0260486			0.0834616	-0.00219831	0.00601399
0.0342722	0.0091322	0.00194194			0.695583	1.89005	1.92378			0.376646	2.26297	2.14502			0.463958	1.89195	2.02597			0.549868	0.817046	1.03855			0.571562	0.263044	0.476669			0.0339436	0.0254065	0.0647248			0.0916283	-0.00214374	0.0114851			-0.0314064	-0.0550767	0.0261495			0.0730293	-0.000755066	0.00537421
0.0329193	0.0101388	0.00131333			0.67063	1.91873	1.94668			0.35303	2.2865	2.16163			0.466129	1.90941	2.03609			0.562219	0.834616	1.0539			0.574292	0.270557	0.483368			0.0513101	0.0289036	0.0650115			0.0994085	0.000665295	0.0111056			-0.0319828	-0.0537723	0.0262195			0.0941978	-0.00154885	0.00522695
0.0414256	0.00755661	0.000880792			0.663207	1.94931	1.95638			0.367157	2.31038	2.17503			0.46194	1.92759	2.05318			0.537377	0.847354	1.07061			0.572179	0.279266	0.490622			0.0540685	0.0320121	0.0644945			0.112644	-0.00251336	0.0112682			-0.0635268	-0.0536189	0.0269788			0.0766111	-0.000827225	0.00489097
0.0276388	0.00598103	0.000357437			0.643289	1.96966	1.97081			0.324742	2.33499	2.18496			0.467147	1.9437	2.06361			0.517568	0.861937	1.08			0.555009	0.287889	0.497799			0.0536089	0.028515	0.0656746			0.113791	-0.00569201	0.0116109			-0.0678299	-0.0574553	0.0268952			0.0395349	0.0025644	0.00518795
0.0397592	0.00716272	-0.000182191			0.653887	1.99599	1.98041			0.324549	2.36177	2.19409			0.465725	1.9617	2.07746			0.494107	0.874412	1.09112			0.553428	0.296597	0.505229			0.0513643	0.0260282	0.0668284			0.124198	-0.00384396	0.0120627			-0.0585896	-0.0557673	0.0261272			0.036854	0.0031417	0.00479652
0.0352753	0.00615609	-0.000600515			0.665821	2.02168	1.99654			0.292469	2.38719	2.20892			0.466484	1.97645	2.09061			0.48923	0.887502	1.10209			0.567094	0.301634	0.510817			0.0634738	0.0265722	0.0681409			0.112079	-0.00569201	0.0128408			-0.0308007	-0.0523912	0.0254094			0.0449842	-0.00140453	0.00445709
0.047002	0.00493064	-0.00110922			0.639694	2.0491	2.01831			0.297541	2.40909	2.21518			0.489856	1.99255	2.11374			0.435231	0.90349	1.1126			0.540442	0.310257	0.517696			0.0613719	0.0252511	0.0692598			0.0896377	-0.00879674	0.0135113			-0.0192699	-0.0499359	0.0245307			0.0386635	-0.00429101	0.004185
0.0410834	0.00560902	-0.00157503			0.640299	2.07253	2.03112			0.308728	2.43152	2.23196			0.473482	2.01309	2.13212			0.430411	0.91658	1.12902			0.569135	0.321356	0.52413			0.0471586	0.0275825	0.0703889			0.0530906	-0.00916635	0.0140025			-0.0507753	-0.051317	0.0239568			0.0329756	-0.00263127	0.00357592
0.0490027	0.00374895	-0.00172213			0.627075	2.09994	2.05027			0.310047	2.45034	2.24764			0.471287	2.03109	2.15313			0.452718	0.928352	1.13944			0.552076	0.326905	0.530978			0.0455248	0.0282042	0.070357			0.0547883	-0.0103491	0.0141852			-0.020595	-0.0509333	0.0234015			0.0231704	-0.00154884	0.00304912
0.0511834	0.00123239	-0.00174602			0.65185	2.126	2.07481			0.300307	2.47413	2.25711			0.471822	2.04539	2.16441			0.424138	0.942759	1.15507			0.579603	0.334845	0.537488			0.067125	0.0268053	0.0715207			0.0357715	-0.0134538	0.0148317			-0.0240561	-0.0520076	0.0224122			0.0329487	-0.00328074	0.00211179
0.0529448	0.00307057	-0.00177494			0.620955	2.1488	2.08689			0.29455	2.49775	2.27065			0.443704	2.05914	2.17769			0.409335	0.956991	1.17078			0.562633	0.346114	0.546661			0.0528402	0.0243185	0.0718434			0.0576206	-0.0150062	0.0151191			-0.0340229	-0.0472503	0.0216527			0.0454386	-0.00400236	0.00148453
0.0399674	0.0070533	-0.0014368			0.614225	2.1744	2.09461			0.288555	2.51693	2.28598			0.420722	2.0795	2.18821			0.406112	0.969114	1.18459			0.553816	0.352603	0.553185			0.0604213	0.0248625	0.0732317			0.0614701	-0.010497	0.0149298			-0.0416393	-0.0465598	0.02081			0.0569726	-0.0027756	0.00106999
0.0470975	0.00709707	-0.00148568			0.600399	2.20371	2.10118			0.276457	2.53674	2.30186			0.381965	2.09325	2.1948			0.389208	0.98686	1.20087			0.574108	0.361226	0.561541			0.0477453	0.029059	0.0739436			0.0567547	-0.0106448	0.0147179			-0.0635024	-0.0441044	0.0198066			0.0786484	-0.00501263	0.000865939
0.0382829	0.00635304	-0.00149676			0.579794	2.22733	2.11832			0.298407	2.55294	2.32676			0.39357	2.10836	2.21429			0.391408	1.00039	1.21463			0.539281	0.372751	0.573101			0.0500837	0.0317013	0.0747065			0.0745577	-0.0128625	0.0143663			-0.0519583	-0.0454856	0.0192761			0.0576212	-0.00364155	0.000213804
0.0366187	0.00722837	-0.000925962			0.591722	2.24976	2.13757			0.295067	2.57311	2.34731			0.396924	2.12509	2.22022			0.375511	1.01646	1.22726			0.529005	0.385814	0.579572			0.0367402	0.0310018	0.0746111			0.0976284	-0.00717045	0.0143189			-0.0378072	-0.0461761	0.0184892			0.0480027	0.00371899	-0.000450206
0.0298205	0.00919785	-0.000199683			0.575395	2.27274	2.14782			0.302269	2.59211	2.36453			0.393672	2.13921	2.23177			0.372259	1.03017	1.23129			0.540571	0.394607	0.583498			0.0356338	0.0330224	0.0767561			0.0818017	-0.00717045	0.0140328			-0.0363398	-0.0444881	0.0179403			0.0435537	0.00559521	-0.000727255
0.0309882	0.00869453	0.000167588			0.566915	2.29572	2.16736			0.25371	2.61093	2.38145			0.372779	2.1478	2.24379			0.347078	1.04607	1.23746			0.521827	0.401949	0.591691			0.0554333	0.0332555	0.0778984			0.107685	-0.00495279	0.0139282			-0.00607679	-0.0435673	0.0177516			0.0184665	0.0035025	-8.56366e-05
0.0182648	0.00956986	0.000388317			0.542171	2.31671	2.17783			0.235482	2.63065	2.39444			0.34342	2.16273	2.25915			0.356025	1.06083	1.25682			0.540913	0.412621	0.603185			0.0554874	0.0355092	0.0791766			0.0861179	-0.00273513	0.0136384			0.00043196	-0.0414189	0.0166833			0.0146308	0.00379115	5.10498e-05
0.0330043	0.0102482	0.000918249			0.534104	2.3396	2.19309			0.217249	2.64422	2.40796			0.313963	2.17865	2.2669			0.352639	1.07726	1.26783			0.521072	0.422525	0.61566			0.0684741	0.03854	0.0785928			0.0860173	0.00177413	0.0129085			0.00162092	-0.0424164	0.0152002			0.0229755	0.00552304	-0.000368449
0.0323769	0.00930726	0.00177426			0.522122	2.36114	2.20337			0.24395	2.66123	2.41547			0.310352	2.19295	2.27896			0.359492	1.09131	1.2779			0.501987	0.431831	0.623343			0.0614685	0.0404051	0.0789491			0.0761391	-0.00170021	0.012326			0.00764106	-0.0413422	0.0145371			0.0357124	0.00682197	-0.000690858
0.0338117	0.00477746	0.00278464			0.492838	2.38032	2.2073			0.238892	2.6805	2.4223			0.323387	2.2019	2.29661			0.336569	1.10748	1.28805			0.497202	0.439258	0.632429			0.0983242	0.0372966	0.0798081			0.0783705	-0.00377003	0.0115117			0.0175155	-0.0431837	0.0136864			0.0234097	0.00682196	-0.00126933
0.026432	0.00598103	0.00331897			0.536963	2.39859	2.2182			0.2305	2.69751	2.42533			0.356027	2.21321	2.30534			0.329151	1.11881	1.29758			0.492768	0.451552	0.644215			0.106866	0.0339549	0.0802314			0.0977347	-0.00354827	0.0106597			0.015349	-0.0418025	0.0127608			0.0208674	0.00949196	-0.00167682
0.02301	0.0074472	0.00322058			0.526026	2.41976	2.23338			0.221749	2.71434	2.44259			0.324869	2.22697	2.31697			0.332098	1.13278	1.31054			0.470027	0.458553	0.654517			0.0991178	0.0355869	0.0796483			0.0817174	-0.00221766	0.0100249			0.0282712	-0.0391937	0.0115677			0.0312903	0.0052344	-0.00244158
0.0150176	0.0043398	0.00332222			0.51731	2.44238	2.24457			0.218125	2.73144	2.45065			0.30761	2.2371	2.33267			0.335232	1.14762	1.32331			0.472852	0.466151	0.661286			0.108777	0.0372966	0.0815376			0.0417988	-0.00694869	0.00969962			0.0313409	-0.0386566	0.0109212			0.0336387	0.00133764	-0.00289803
0.0265477	0.00335506	0.00332168			0.522678	2.46246	2.25723			0.2103	2.74492	2.46822			0.3301	2.24913	2.34353			0.320633	1.16273	1.34359			0.471781	0.476994	0.670989			0.0949034	0.0358978	0.0815815			0.0229434	-0.00709653	0.00976101			0.0318839	-0.0356642	0.0101885			0.0625022	0.00169845	-0.00308475
0.00498956	0.0042085	0.0034074			0.49277	2.48173	2.26364			0.228748	2.75713	2.47997			0.350688	2.26415	2.35827			0.332832	1.17407	1.35898			0.457753	0.486983	0.677668			0.0836563	0.0367526	0.0824861			0.0111989	-0.00983165	0.00955236			0.0385104	-0.0385799	0.00987771			0.0581195	0.00436845	-0.00294237
-0.000874039	0.00276421	0.00340484			0.467943	2.5011	2.274			0.230056	2.77143	2.49162			0.34415	2.27184	2.3687			0.307992	1.18645	1.37349			0.465249	0.495179	0.6873			0.0870076	0.0341104	0.084381			-0.00431126	-0.00990558	0.0101312			0.0509483	-0.0396541	0.00932189			0.0641994	0.00162629	-0.00268271
-0.0314484	0.00162629	0.00367124			0.467748	2.52145	2.2879			0.211968	2.78717	2.49929			0.345492	2.27835	2.37668			0.325296	1.20192	1.38743			0.467478	0.503375	0.699598			0.117378	0.0327115	0.0859104			-0.00587517	-0.010423	0.00971825			0.0496763	-0.0329787	0.00870713			0.0569011	0.000543858	-0.00290606
-0.0208538	0.00490876	0.00378194			0.473036	2.53937	2.30654			0.194644	2.79929	2.51354			0.330834	2.29428	2.39239			0.323641	1.21694	1.40776			0.45722	0.517803	0.7123			0.107178	0.0367526	0.0875085			0.0190779	-0.00768791	0.0096288			0.0408236	-0.0326717	0.00820153			0.0447047	0.00184278	-0.00296244
-0.0314951	0.00738155	0.0039929			0.482197	2.55999	2.31924			0.180239	2.80924	2.5181			0.335584	2.30604	2.39669			0.322157	1.23012	1.41794			0.432735	0.526682	0.724331			0.108778	0.0389286	0.0872859			0.0285796	-0.00643123	0.0095949			0.0560486	-0.0315208	0.00796005			0.069058	0.00148197	-0.0026458
-0.0264841	0.0034207	0.00430288			0.495028	2.57863	2.32973			0.186165	2.81892	2.53529			0.3324	2.31237	2.40144			0.323766	1.24646	1.42898			0.431433	0.53522	0.737106			0.106777	0.0425811	0.0885533			0.0169544	-0.00746614	0.00928968			0.071019	-0.0335158	0.00757246			0.0655176	-0.000538576	-0.00314406
-0.0156337	0.00372707	0.00475536			0.509398	2.59274	2.34653			0.157812	2.82779	2.54527			0.327633	2.32069	2.40981			0.304436	1.25963	1.43905			0.406613	0.551441	0.752329			0.0898108	0.0416485	0.0897207			0.00389629	-0.0053224	0.00834782			0.0919591	-0.0319812	0.00707331			0.0819756	0.00696629	-0.00294501
-0.012538	0.00630928	0.00527211			0.474791	2.60975	2.36349			0.188184	2.83801	2.55543			0.328409	2.33047	2.42142			0.310013	1.27483	1.45426			0.423706	0.559722	0.766207			0.126978	0.0414154	0.0903543			0.00601569	-0.00118276	0.00808019			0.0713178	-0.0327485	0.00677151			0.0587515	0.00970845	-0.00303167
-0.0186695	0.0060248	0.005659			0.469491	2.62495	2.37458			0.186599	2.8486	2.55919			0.34091	2.33589	2.43413			0.306524	1.28748	1.46408			0.424775	0.569028	0.780032			0.126939	0.0432028	0.0903699			0.00722562	0.000813146	0.00817929			0.0627857	-0.0330554	0.00742621			0.0234369	0.0073271	-0.00208258
-0.0205228	0.00565278	0.00637846			0.463099	2.64296	2.38538			0.180401	2.859	2.5659			0.327313	2.34232	2.45044			0.312826	1.30584	1.47941			0.412643	0.580212	0.788173			0.1206	0.0449125	0.0914954			0.0315744	0.00147845	0.0091034			0.0592709	-0.0276843	0.0078965			0.012149	0.00581169	-0.0014509
-0.0216058	0.00690012	0.00718155			0.443119	2.65571	2.3854			0.180997	2.86606	2.57361			0.327629	2.35281	2.4634			0.326621	1.32095	1.49195			0.392646	0.593275	0.793483			0.114804	0.0482541	0.0913157			0.0267887	0.00221767	0.0099219			0.073481	-0.0296793	0.00788861			0.0257593	0.00934764	-0.000958484
-0.0422109	0.00449298	0.00790827			0.414122	2.66992	2.39182			0.193323	2.87366	2.58677			0.321609	2.35996	2.47603			0.328549	1.33255	1.50382			0.405468	0.604715	0.798773			0.107554	0.0477102	0.0934735			0.0397276	0.00229159	0.00966419			0.0704228	-0.0315208	0.00778482			0.0475766	0.0101414	-0.000584447
-0.051485	0.00156064	0.00830639			0.378304	2.68276	2.39355			0.204414	2.88289	2.60126			0.320606	2.36304	2.47896			0.344998	1.34783	1.51628			0.41609	0.61035	0.805664			0.113859	0.0459228	0.0959208			0.0407079	-0.00103491	0.00985001			0.0844288	-0.0313673	0.00753024			0.0267507	0.00797656	-0.000345685
-0.0389793	0.000203886	0.00892355			0.343858	2.69407	2.41096			0.181703	2.89356	2.60934			0.363087	2.3681	2.48592			0.345124	1.35952	1.52823			0.421699	0.625717	0.814886			0.0991924	0.0443685	0.0976135			0.0602876	-0.00325258	0.0103724			0.0649944	-0.0295258	0.00721129			0.0246597	0.0105022	-0.000137059
-0.0318584	0.00204207	0.00935885			0.342115	2.70746	2.42675			0.150162	2.89782	2.61441			0.364039	2.37507	2.49197			0.322979	1.37261	1.54168			0.425708	0.632974	0.821636			0.070581	0.0453788	0.0978475			0.0560284	0.000665298	0.00988235			0.0582434	-0.0286051	0.00683684			0.051048	0.00855386	-0.000357273
-0.0149647	0.00107921	0.0100528			0.347034	2.72158	2.4357			0.18727	2.90641	2.62218			0.358571	2.38122	2.49628			0.300135	1.38587	1.55592			0.417207	0.640402	0.834595			0.081258	0.0445239	0.0983246			0.0584467	-0.0013306	0.00903174			0.0541958	-0.0270705	0.00662802			0.0341822	0.00263656	-0.000163282
-0.00382786	-0.00261903	0.0107293			0.324095	2.73542	2.44082			0.169018	2.91075	2.62845			0.333481	2.38421	2.50076			0.313339	1.39879	1.57815			0.428194	0.652525	0.850797			0.0719047	0.0461559	0.0992931			0.0824115	-0.00739222	0.00814136			0.0306838	-0.0255359	0.00676841			0.0318141	0.00256439	-0.000485441
-0.00579067	-0.00237832	0.0115014			0.31781	2.74709	2.44755			0.146978	2.916	2.62874			0.330091	2.39199	2.51414			0.283042	1.41214	1.59275			0.455657	0.663026	0.867102			0.0572954	0.0420371	0.100088			0.087278	-0.00872282	0.00797248			0.0221981	-0.0285284	0.00630006			-0.00150313	0.00393548	-0.00101453
-0.0161521	-0.00178748	0.0125146			0.313843	2.75586	2.45694			0.160266	2.92089	2.63569			0.317709	2.39705	2.52738			0.272315	1.42259	1.6036			0.473161	0.673186	0.877142			0.0702597	0.0442131	0.100542			0.0905066	-0.00687477	0.00777581			0.0260635	-0.0286051	0.00578868			0.0184357	0.00494575	-0.00186822
-0.00740973	-0.00191878	0.0133058			0.328147	2.76998	2.46692			0.173081	2.92514	2.64544			0.323163	2.39823	2.53934			0.251825	1.43823	1.6158			0.480975	0.682918	0.88779			0.0695328	0.0432805	0.103562			0.0845473	-0.006653	0.00731313			0.0313217	-0.0258428	0.00533335			0.0189114	0.000399536	-0.00226268
-0.00288475	-0.00169995	0.0136692			0.332236	2.7821	2.47101			0.178478	2.92912	2.65639			0.302991	2.40293	2.55216			0.250109	1.45158	1.63007			0.440894	0.696664	0.893772			0.0767074	0.0460005	0.104205			0.094876	-0.00576593	0.00707473			0.0224351	-0.0217762	0.00487985			0.0212289	0.00162629	-0.00271216
0.0115945	0.000335182	0.0141241			0.353184	2.79169	2.48532			0.166127	2.92686	2.66645			0.301138	2.41162	2.56629			0.248339	1.46511	1.64093			0.474975	0.709043	0.896			0.0830634	0.0475547	0.104678			0.0958653	-0.00377004	0.00718632			0.0535396	-0.0244617	0.00447489			0.0103996	0.00343035	-0.00318043
0.030395	-0.00106534	0.0149528			0.332485	2.80499	2.49072			0.172151	2.92758	2.68306			0.28873	2.41225	2.57606			0.235944	1.47785	1.64713			0.452893	0.719971	0.909387			0.0928557	0.050741	0.10983			0.0884513	-0.0026612	0.00696587			0.0282021	-0.023541	0.00410597			0.0138697	0.00213142	-0.004169
0.0326761	-0.00316611	0.0156576			0.322389	2.8116	2.49948			0.163352	2.93002	2.69321			0.289602	2.41171	2.58549			0.211632	1.49226	1.65746			0.453891	0.732607	0.919609			0.0946999	0.0498084	0.112181			0.102265	-0.00280904	0.00645473			0.0352674	-0.0258428	0.00358871			0.0278899	0.00703845	-0.00439986
0.0286536	-0.000277544	0.0159413			0.331106	2.81739	2.5106			0.148332	2.93129	2.70126			0.287761	2.41198	2.58933			0.205616	1.50482	1.67425			0.451598	0.746523	0.93242			0.0705882	0.0517512	0.115401			0.115086	0.000147843	0.00632766			0.0378571	-0.0244617	0.00284128			0.0252304	0.0115125	-0.00450999
0.0190222	0.0016044	0.0161147			0.331374	2.82752	2.52288			0.187084	2.92993	2.71519			0.303238	2.41605	2.59262			0.189629	1.51738	1.68513			0.468424	0.75506	0.936296			0.0611022	0.0515958	0.119548			0.136076	0.00583985	0.00626847			0.0508926	-0.0228504	0.00272797			0.0101018	0.00927548	-0.00510494
0.0255907	-0.000890272	0.0164475			0.348086	2.83557	2.52665			0.176247	2.93138	2.7246			0.303081	2.41469	2.5953			0.196332	1.53355	1.70258			0.471123	0.764025	0.949963			0.052331	0.0561809	0.122577			0.151569	0.00384395	0.00635529			0.016682	-0.0210089	0.00269678			-0.00163639	0.00624467	-0.00580035
0.0327501	-0.00196254	0.0164647			0.316795	2.84181	2.5297			0.175582	2.92921	2.73536			0.308717	2.4175	2.59878			0.213299	1.54734	1.71399			0.450619	0.778453	0.95815			0.0813413	0.0581237	0.127025			0.165481	0.00317866	0.00612183			0.0231045	-0.0240781	0.00241068			-0.0193259	0.00884251	-0.00630416
0.0324433	-0.00231267	0.0163792			0.321256	2.84426	2.53165			0.165506	2.92505	2.73961			0.304553	2.41813	2.60419			0.181996	1.55656	1.7229			0.438967	0.790576	0.967848			0.11291	0.0577352	0.129707			0.191523	0.00317866	0.00615768			0.0147128	-0.0256894	0.00179427			-0.0252173	0.0105022	-0.00684286
0.0372015	-0.00443533	0.0161852			0.342572	2.84896	2.53839			0.140421	2.92767	2.74107			0.296581	2.41696	2.62431			0.16975	1.56992	1.7346			0.443781	0.79715	0.977857			0.12777	0.0562586	0.132776			0.195981	0.00303081	0.00672345			0.0136944	-0.0245384	0.00111544			-0.0193954	0.00797656	-0.00708764
0.0305269	-0.00653611	0.0161749			0.363546	2.85484	2.54596			0.160817	2.92695	2.73927			0.288631	2.4108	2.63555			0.175202	1.58055	1.74349			0.461214	0.809786	0.987765			0.149807	0.0529947	0.136324			0.229152	0.000887065	0.00718684			-0.0345918	-0.0226969	0.000700317			-0.0353862	0.00739926	-0.00713483
0.0342818	-0.0059015	0.0165256			0.37121	2.85891	2.55577			0.168452	2.92487	2.74061			0.277304	2.41442	2.64454			0.21185	1.59267	1.75599			0.451252	0.821653	1.00152			0.165469	0.0557923	0.138552			0.215161	-0.00162629	0.00701794			-0.0199361	-0.0209321	0.000311592			-0.0459435	0.00436846	-0.00708714
0.0266909	-0.00544196	0.0168898			0.35353	2.86461	2.5607			0.140936	2.9217	2.73861			0.286735	2.41641	2.65472			0.232073	1.60374	1.76764			0.442507	0.832239	1.00952			0.144193	0.0560255	0.141022			0.223741	-0.000887069	0.00712041			-0.00958803	-0.0206252	-0.000418492			-0.0534749	0.00321386	-0.00718867
0.0438097	-0.0083743	0.0174434			0.354293	2.87076	2.56388			0.162407	2.916	2.74109			0.287091	2.41117	2.66474			0.227678	1.61481	1.77405			0.443124	0.841545	1.01711			0.146195	0.0578129	0.143104			0.249375	-0.0039918	0.00688768			0.00102424	-0.0221598	-0.000913103			-0.0626989	-3.34408e-05	-0.00704804
0.0394622	-0.011044	0.0175824			0.385776	2.87067	2.57859			0.135739	2.91202	2.74524			0.248913	2.40809	2.67621			0.232859	1.62412	1.7865			0.432731	0.853839	1.02685			0.123102	0.0549375	0.143996			0.2557	-0.00909243	0.00658049			0.0122252	-0.023234	-0.00160461			-0.0778439	0.00169845	-0.00650048
0.0395016	-0.00767404	0.0175218			0.389767	2.87312	2.57705			0.131331	2.90686	2.75429			0.243563	2.40755	2.6893			0.205212	1.63457	1.79465			0.447606	0.864853	1.03527			0.139825	0.0542381	0.145929			0.240749	-0.00576593	0.00703379			-0.00591942	-0.0230038	-0.0018721			-0.0510444	0.00234791	-0.0058187
0.0389615	-0.0061641	0.0178839			0.363131	2.8761	2.58802			0.13161	2.90306	2.76965			0.256732	2.4052	2.68514			0.236014	1.64828	1.80652			0.441237	0.873988	1.04464			0.11774	0.0571134	0.146778			0.239232	-0.00391788	0.0072662			-0.000722457	-0.0204718	-0.00182746			-0.0548789	-0.00140452	-0.00494485
0.0314992	-0.00736767	0.018106			0.364855	2.88352	2.59586			0.0991475	2.89818	2.7777			0.233525	2.40022	2.68046			0.245141	1.66023	1.81552			0.43473	0.887562	1.05551			0.115892	0.059678	0.150467			0.2207	-0.00517455	0.00755302			0.00493395	-0.0186303	-0.00247406			-0.0611292	-0.0021983	-0.00438228
0.0408263	-0.00568267	0.0183158			0.369415	2.88271	2.60175			0.095271	2.88587	2.78819			0.213463	2.40067	2.6892			0.245082	1.67033	1.82302			0.41271	0.901393	1.06778			0.109425	0.0630196	0.153547			0.201893	-0.0039918	0.00775565			0.0212596	-0.0206252	-0.00269337			-0.0615742	-0.000466413	-0.00289388
0.0223218	-0.00511371	0.0183614			0.407892	2.8856	2.60945			0.0909023	2.8771	2.79535			0.206005	2.39859	2.6967			0.24	1.68166	1.835			0.435994	0.912833	1.08505			0.090569	0.0655065	0.158373			0.207168	-0.00236551	0.00713526			0.0330605	-0.020702	-0.00212837			-0.0468016	0.00386332	-0.00125939
0.0230596	-0.00546384	0.018763			0.393153	2.88578	2.6269			0.0845801	2.86841	2.79914			0.208445	2.38918	2.6992			0.223135	1.69185	1.85633			0.412428	0.92231	1.08943			0.0738044	0.0660505	0.162868			0.201211	-0.000665301	0.0069981			0.0464173	-0.0218529	-0.00195737			-0.0407117	0.00364683	0.000133885
0.0171583	-0.00618598	0.0191448			0.397207	2.88234	2.6424			0.0720822	2.86163	2.80816			0.18715	2.38421	2.71004			0.241419	1.70371	1.86723			0.422964	0.93836	1.1009			0.0803955	0.0655842	0.163718			0.209459	0.000443534	0.00684383			0.0433679	-0.0200881	-0.00105703			-0.0556987	0.00494575	0.00130771
0.019249	-0.00196254	0.0194998			0.408082	2.87981	2.65442			0.0673837	2.85231	2.81437			0.197546	2.3805	2.71854			0.24583	1.71548	1.87993			0.403859	0.949801	1.11485			0.0918789	0.0682264	0.167952			0.1889	0.00717046	0.00653227			0.0575791	-0.0208554	-0.000296579			-0.0464188	0.00638899	0.0029711
0.0190352	-0.00351625	0.0191823			0.417587	2.8809	2.66433			0.0743258	2.84154	2.8221			0.205188	2.37579	2.73653			0.273878	1.72743	1.88665			0.39257	0.95646	1.12288			0.0606391	0.0738218	0.17161			0.160709	0.00591378	0.00634859			0.0627077	-0.0186303	0.000984964			-0.0434744	0.00357467	0.00443048
0.00847739	-0.00638293	0.0191382			0.381649	2.87891	2.671			0.0584807	2.83277	2.82755			0.188798	2.36629	2.74081			0.272562	1.7363	1.89346			0.39286	0.969181	1.13232			0.0382771	0.0776297	0.174412			0.150597	0.000813144	0.00583734			0.0438049	-0.0219296	0.00261632			-0.0261553	0.00516224	0.00514904
0.00404579	-0.00682059	0.0190134			0.346157	2.8723	2.68081			0.0168883	2.82236	2.8371			0.18736	2.36222	2.74681			0.285808	1.74702	1.90116			0.401963	0.981219	1.14392			0.0742271	0.0740549	0.177613			0.156446	0.0026612	0.00538934			0.0379721	-0.024385	0.00308222			-0.0217383	0.00747143	0.00560701
-0.0102105	-0.00587962	0.0186584			0.339521	2.86606	2.68211			0.021678	2.81395	2.85296			0.200301	2.3548	2.75009			0.31516	1.75361	1.91244			0.3778	0.989585	1.15126			0.0497065	0.0749097	0.183685			0.176481	0.00325258	0.00495385			0.0247463	-0.0216995	0.0044815			0.00670455	0.00530656	0.00575168
-0.00805996	-0.00833053	0.0182221			0.320227	2.86624	2.68996			0.0247865	2.80499	2.86317			0.202118	2.34557	2.75926			0.306733	1.76073	1.92105			0.419661	0.998037	1.15941			0.0382912	0.0751429	0.187979			0.20573	0.000739223	0.00431956			0.00618414	-0.0230038	0.00610722			0.0144702	0.00177061	0.00613504
-0.000202444	-0.00861501	0.0177338			0.338853	2.8619	2.69764			0.0294007	2.79386	2.86089			0.229778	2.33797	2.76374			0.313932	1.77074	1.93769			0.422019	1.0105	1.16974			0.0492366	0.078096	0.191909			0.231083	-0.00236551	0.00423703			-0.0153562	-0.0216227	0.00661216			0.0319318	-0.00169317	0.00666185
0.00593252	-0.00776157	0.0172495			0.342578	2.85728	2.71145			0.0126466	2.7821	2.85744			0.198953	2.33481	2.77381			0.289701	1.7797	1.95114			0.405695	1.02083	1.17825			0.0431994	0.0784068	0.194896			0.251641	-0.00280904	0.00420135			-0.012465	-0.0213925	0.00699997			0.0686997	-0.000899388	0.00692845
0.0112256	-0.00933715	0.0164643			0.346487	2.85493	2.71225			-0.00011595	2.76717	2.85855			0.215533	2.3263	2.78946			0.29801	1.78427	1.97829			0.394018	1.02954	1.18994			0.0428086	0.0820594	0.195411			0.267591	-0.00517456	0.0044182			0.00243977	-0.0226969	0.00834251			0.0590051	-0.0021983	0.00821561
0.00300597	-0.010672	0.0157141			0.353282	2.84987	2.71629			0.00581145	2.75496	2.85666			0.181179	2.31129	2.7948			0.316938	1.79472	1.99166			0.385036	1.04175	1.19558			0.0454071	0.0795725	0.198291			0.273817	-0.00879674	0.00456115			-0.00156952	-0.0234642	0.0108718			0.0810868	-0.00465182	0.00910328
-0.00221675	-0.00819923	0.0151837			0.345554	2.83991	2.71957			-0.0153597	2.74392	2.85798			0.197672	2.30866	2.80757			0.341404	1.80123	2.00137			0.362978	1.05251	1.20418			0.0286066	0.0793394	0.201419			0.276684	-0.00635731	0.00443142			-0.0105059	-0.0230038	0.0131236			0.0801068	-0.00429101	0.00968031
-0.00397543	-0.00500429	0.0149852			0.35599	2.83648	2.72153			-0.0136443	2.72981	2.85438			0.18346	2.30133	2.80884			0.306635	1.80957	2.0109			0.37544	1.06173	1.21508			0.00558123	0.0851679	0.202976			0.273522	-0.00443533	0.00450668			-0.00269792	-0.0206252	0.0137232			0.0556742	-0.0045075	0.0107028
0.000899095	-0.00594527	0.0147388			0.351394	2.83611	2.72189			0.00619535	2.71325	2.85765			0.180698	2.29238	2.81377			0.28032	1.81695	2.02033			0.391536	1.07496	1.22458			0.0321877	0.0884318	0.203777			0.2357	-0.00495279	0.0047357			0.00998994	-0.0209322	0.0150706			0.0489744	-0.00761047	0.0108193
0.0145843	-0.00765215	0.0147187			0.337975	2.82661	2.72785			-0.019768	2.69462	2.86082			0.171716	2.28261	2.82018			0.307716	1.82494	2.03457			0.388414	1.08623	1.24322			0.0345202	0.0934832	0.206191			0.26863	-0.00591377	0.00498234			-0.0222064	-0.0226202	0.0170431			0.0767852	-0.00421885	0.0117098
0.000701357	-0.00388825	0.014654			0.319164	2.8182	2.7347			-0.0516629	2.67933	2.86816			0.165317	2.27247	2.82702			0.290909	1.83109	2.05265			0.378774	1.09741	1.25453			0.0390126	0.0947266	0.207734			0.25049	-0.00184805	0.00491366			-0.0107169	-0.0236944	0.0181687			0.0971063	3.87213e-05	0.0130898
-0.00178465	-0.00268469	0.014531			0.319426	2.81105	2.73989			-0.082544	2.66521	2.86871			0.165483	2.26071	2.83516			0.279635	1.83803	2.06345			0.372751	1.10629	1.26451			0.034827	0.0985345	0.214266			0.270366	0.0013306	0.00501936			0.00947031	-0.0266101	0.0179194			0.124442	0.000688183	0.0134076
0.00171798	-0.00360378	0.0147906			0.316288	2.79983	2.75961			-0.0539728	2.64956	2.87051			0.143255	2.24814	2.83514			0.270975	1.84849	2.07627			0.39828	1.11662	1.27427			0.037392	0.0997002	0.215187			0.273907	0.000369611	0.00530503			-0.022261	-0.024385	0.018817			0.117319	-0.00176534	0.0136511
-0.00102342	-0.000649556	0.014754			0.315582	2.78907	2.76726			-0.0448282	2.63364	2.87735			0.151648	2.23855	2.83498			0.293013	1.85367	2.08996			0.40921	1.12747	1.28179			0.026395	0.104985	0.217304			0.318538	0.00421357	0.00559165			-0.0429242	-0.0237711	0.0199792			0.1093	0.000183041	0.0136966
-0.00361878	-5.87133e-05	0.0147019			0.321372	2.78074	2.77933			-0.0447543	2.61156	2.87769			0.144108	2.22896	2.84518			0.303831	1.86105	2.10395			0.390349	1.13737	1.29267			0.0304577	0.11058	0.222493			0.312774	0.00502671	0.00564146			-0.0478761	-0.0239246	0.0211334			0.10994	0.0031417	0.0140108
-0.00752655	-0.00329741	0.0147883			0.322997	2.77061	2.78511			-0.0415926	2.59663	2.87781			0.165385	2.21511	2.85023			0.287073	1.86738	2.11754			0.381413	1.14531	1.30253			0.0554286	0.1133	0.224287			0.297114	0.00125668	0.00557769			-0.0398004	-0.0259963	0.0213187			0.120734	-0.000105604	0.0146188
-0.00746378	-0.00522313	0.0149987			0.34653	2.75577	2.78389			-0.0305944	2.57981	2.88205			0.178523	2.20073	2.85205			0.289567	1.87045	2.12151			0.387452	1.15444	1.31045			0.0574725	0.111901	0.224967			0.284046	-0.00206982	0.00578522			-0.0615554	-0.0264567	0.0210553			0.130163	0.0014098	0.013992
-0.00547804	-0.00342871	0.0156181			0.338886	2.74302	2.78385			-0.010776	2.56325	2.89045			0.175359	2.19041	2.861			0.251018	1.87555	2.13127			0.376148	1.16537	1.31797			0.0614145	0.113222	0.231009			0.281613	0.0006653	0.00700302			-0.0605787	-0.0266101	0.0210632			0.15715	0.00119331	0.0133466
-0.00245248	-0.00259715	0.0162291			0.310643	2.73316	2.78172			-0.0134413	2.54696	2.8883			0.166289	2.17775	2.86731			0.216997	1.87801	2.14845			0.359373	1.17237	1.33108			0.0796999	0.112989	0.235962			0.265456	-0.000295693	0.00736636			-0.0428497	-0.0266869	0.0210302			0.147342	-0.00291993	0.0128142
0.000628874	-0.00426027	0.0169546			0.312169	2.72149	2.78859			0.00361601	2.5286	2.88884			0.192541	2.16427	2.86909			0.241355	1.88539	2.15828			0.361825	1.17937	1.34438			0.0737485	0.118662	0.237189			0.236378	-0.00421357	0.00757991			-0.0503565	-0.0253057	0.0201404			0.12774	-0.00761047	0.0117504
0.00384002	-0.00441345	0.0175244			0.306805	2.70873	2.79514			0.0126629	2.50797	2.88852			0.205882	2.15133	2.86872			0.222974	1.88916	2.16804			0.334371	1.19047	1.34786			0.0701926	0.12146	0.2413			0.219206	-0.006653	0.00765657			-0.0472269	-0.0246919	0.019585			0.115834	-0.00465182	0.0112643
0.0097941	-0.00469793	0.0176836			0.301662	2.69724	2.80539			0.0242225	2.48789	2.89186			0.196973	2.14256	2.8702			0.222666	1.88978	2.18099			0.328098	1.19892	1.36117			0.0839916	0.123247	0.245392			0.219597	-0.0073183	0.00811656			-0.038308	-0.0282982	0.0201268			0.12908	-0.00472399	0.0106871
0.0286542	-0.00609845	0.017875			0.316503	2.68322	2.80667			0.0261412	2.46762	2.88954			0.167636	2.12627	2.88434			0.24133	1.89197	2.19124			0.314471	1.20704	1.37538			0.0763952	0.123791	0.249674			0.235756	-0.0111623	0.00874311			-0.0568072	-0.0285284	0.0210493			0.117958	-0.00818777	0.010662
0.0409862	-0.00406332	0.0181422			0.314405	2.67037	2.80414			0.0159135	2.45215	2.89242			0.1321	2.11143	2.88372			0.264636	1.89847	2.20537			0.317917	1.21771	1.39003			0.059475	0.125579	0.252714			0.220422	-0.00850105	0.00934101			-0.0584434	-0.0259963	0.0209613			0.115473	-0.00912588	0.0101702
0.0464601	7.25858e-05	0.0181051			0.332795	2.65707	2.81004			0.0178583	2.42962	2.89107			0.165727	2.10211	2.88349			0.226547	1.90129	2.22197			0.311047	1.22616	1.39773			0.0246583	0.131019	0.25444			0.220545	-0.00591378	0.00956195			-0.0366809	-0.0266101	0.020727			0.113881	-0.00905371	0.00958347
0.0524637	0.00037895	0.0179026			0.298374	2.64585	2.8176			0.0240258	2.40791	2.88432			0.204572	2.08891	2.88462			0.234216	1.90445	2.23131			0.312058	1.23538	1.40406			0.0169366	0.136925	0.256234			0.189123	-0.00428749	0.0097429			-0.0510748	-0.0251523	0.0213324			0.102332	-0.00847642	0.00957128
0.0654711	-0.00126228	0.0177747			0.288779	2.63101	2.82454			0.00563958	2.38574	2.88946			0.183171	2.07099	2.88277			0.215774	1.90919	2.24085			0.276334	1.24511	1.41241			0.0211169	0.140966	0.258759			0.200802	-0.0079836	0.0102625			-0.0931212	-0.0289887	0.0222165			0.10312	-0.00761047	0.00950372
0.0483226	0.000466482	0.017537			0.30077	2.61391	2.83096			0.00138044	2.36349	2.88872			0.156862	2.05833	2.88734			0.237223	1.91104	2.25976			0.282076	1.25783	1.42346			0.0155617	0.144152	0.262634			0.193536	-0.00569201	0.0112896			-0.105897	-0.0277611	0.0224275			0.0712578	-0.00205398	0.00934271
0.0395488	0.00313622	0.0172255			0.284814	2.59627	2.83147			-0.000586566	2.34141	2.89377			0.176746	2.0424	2.89006			0.193327	1.91148	2.26718			0.269749	1.265	1.44001			0.0275853	0.145784	0.266479			0.185224	-0.000887066	0.0118281			-0.0998511	-0.0306768	0.0229187			0.110801	0.000688178	0.00864719
0.0413613	0.00377083	0.017177			0.292221	2.58134	2.83202			0.017006	2.31988	2.88985			0.16596	2.02313	2.88697			0.176667	1.9171	2.27826			0.249705	1.2703	1.45331			0.0410513	0.152001	0.270139			0.17935	0.000960988	0.0124601			-0.108614	-0.0277611	0.0230292			0.133595	-0.00443534	0.00809534
0.0459342	0.00304869	0.0167718			0.314747	2.56289	2.83368			0.0349977	2.29925	2.88923			0.171909	2.00938	2.89335			0.185331	1.92088	2.28837			0.250677	1.28012	1.46396			0.0266927	0.158218	0.270672			0.162445	0.000739223	0.0130671			-0.115959	-0.0282982	0.0231973			0.138429	-0.0027756	0.00811003
0.0474059	0.00420849	0.0161085			0.299313	2.5457	2.83858			0.0306827	2.27419	2.90279			0.151223	1.99671	2.90093			0.231675	1.92272	2.29297			0.232183	1.29087	1.47474			-0.00473233	0.160627	0.27189			0.14657	0.00110883	0.0134234			-0.10134	-0.0319812	0.0229824			0.141479	-0.000610741	0.00787965
0.0514368	0.00307057	0.0154264			0.284919	2.52661	2.85143			0.0415553	2.25185	2.91352			0.169246	1.98016	2.90699			0.21019	1.92237	2.30136			0.235267	1.296	1.4902			-0.00791031	0.1663	0.275343			0.141302	0.00140452	0.014401			-0.095351	-0.0308302	0.0230309			0.123305	-0.0006829	0.00747396
0.0453884	0.000663429	0.0145447			0.338576	2.50643	2.86047			0.0363095	2.23303	2.92039			0.17778	1.95971	2.91169			0.201269	1.92202	2.30657			0.22374	1.30069	1.50499			0.0070578	0.165834	0.276216			0.148087	-0.00243944	0.014339			-0.0708381	-0.0308302	0.0231289			0.124079	-0.00176533	0.00710886
0.0404236	0.00164817	0.0136816			0.353423	2.48752	2.86204			0.0358389	2.21059	2.9277			0.180802	1.94433	2.91604			0.205204	1.92219	2.31019			0.215052	1.31179	1.51673			-0.000113498	0.166611	0.278671			0.170118	-0.00443533	0.0137825			-0.0753123	-0.0288353	0.0232139			0.114682	-0.00198182	0.00731837
0.0544022	0.00322375	0.0128739			0.351793	2.46943	2.8632			0.0440221	2.18897	2.93606			0.178151	1.93022	2.92299			0.194244	1.92378	2.31873			0.199696	1.31751	1.53033			0.00500811	0.170264	0.28105			0.168911	-0.0033265	0.0136544			-0.0889643	-0.0294491	0.0227957			0.0969026	-0.00515695	0.00810173
0.0468975	0.00195453	0.0120677			0.342538	2.45269	2.86606			0.0505594	2.1659	2.93598			0.191824	1.91149	2.92471			0.167076	1.9229	2.31781			0.222128	1.32289	1.53967			0.010265	0.176325	0.285062			0.165384	-0.006653	0.0137817			-0.0887603	-0.0286051	0.0227845			0.0919078	-0.00667236	0.00870718
0.0481519	-8.05954e-05	0.0112367			0.32645	2.43397	2.8753			0.0571699	2.14066	2.92994			0.1939	1.89539	2.9273			0.147669	1.92571	2.33242			0.25696	1.33109	1.55382			-0.00590008	0.178812	0.291743			0.177106	-0.0121232	0.0138505			-0.112199	-0.0300629	0.023002			0.0941807	-0.0066002	0.00878617
0.0357943	0.00131992	0.0107379			0.310175	2.41261	2.87866			0.0625401	2.11731	2.93581			0.169852	1.88163	2.92403			0.139973	1.92202	2.33722			0.212885	1.34133	1.56192			-0.0179511	0.180755	0.295743			0.168683	-0.0116797	0.0141643			-0.128012	-0.0313674	0.022919			0.0826299	-0.00429101	0.00882703
0.0336194	0.00221713	0.0100119			0.314179	2.39334	2.87812			0.0640601	2.09316	2.94077			0.153438	1.86282	2.92719			0.137772	1.9207	2.33765			0.211764	1.34415	1.57057			-0.00915907	0.182698	0.299871			0.154119	-0.0108666	0.0144199			-0.144546	-0.0318277	0.022691			0.0784899	-0.00963101	0.00914703
0.0434804	0.00313622	0.00921594			0.31875	2.37552	2.88107			0.0403122	2.07135	2.94153			0.140702	1.84391	2.93306			0.123452	1.92096	2.34194			0.219546	1.3532	1.58986			-0.00843528	0.188449	0.30331			0.151786	-0.00990558	0.0145209			-0.143652	-0.0261498	0.0218766			0.100761	-0.0105691	0.00967877
0.0363542	0.00458051	0.00878482			0.302494	2.35516	2.88102			0.0617978	2.04485	2.9407			0.144031	1.82835	2.9365			0.156994	1.91947	2.36525			0.213825	1.36438	1.59862			0.00110091	0.193578	0.307809			0.156358	-0.0099795	0.0142424			-0.138643	-0.0282214	0.0217375			0.0864181	-0.00890939	0.0100078
0.0368991	0.00766603	0.00839297			0.326282	2.3368	2.88499			0.0662613	2.0177	2.94455			0.146855	1.81496	2.93628			0.132838	1.92035	2.37235			0.189741	1.37078	1.61107			0.0240488	0.199328	0.314465			0.169769	-0.0079836	0.0135476			-0.113265	-0.027224	0.0222526			0.081184	-0.00566209	0.0104861
0.0405189	0.00587161	0.00804475			0.312635	2.31789	2.89117			0.0739122	1.99617	2.94642			0.174507	1.79388	2.93628			0.113406	1.92	2.3832			0.211787	1.37557	1.62664			0.0136154	0.204224	0.319178			0.150081	-0.00709653	0.0127321			-0.095667	-0.0286818	0.022797			0.0614803	-0.00443534	0.010346
0.0449714	0.0056309	0.00766415			0.282942	2.29355	2.88808			0.0637087	1.96939	2.94319			0.166992	1.77252	2.93532			0.0827436	1.91947	2.39147			0.194139	1.38905	1.6362			-0.0233509	0.205545	0.325898			0.164517	-0.00731829	0.01303			-0.0674176	-0.0298328	0.0221006			0.0275482	-0.000971546	0.0099724
0.0487149	0.00932915	0.00738253			0.276474	2.27112	2.89683			0.0323982	1.94397	2.94795			0.143973	1.7585	2.93598			0.124889	1.9185	2.40258			0.191138	1.39537	1.64337			-0.0298129	0.20811	0.332929			0.181423	-0.000887064	0.0127165			-0.0640104	-0.0285284	0.0217668			0.0273565	-0.000249927	0.00941688
0.0436529	0.0109047	0.00687629			0.257114	2.24913	2.90187			0.0243321	1.91963	2.95292			0.105179	1.7367	2.93464			0.0881611	1.91736	2.41276			0.196044	1.4005	1.65799			-0.0426282	0.216814	0.335923			0.174776	0.00273512	0.0124044			-0.0711889	-0.027224	0.0221812			0.0199615	-0.00032209	0.00927213
0.0414364	0.00919785	0.0064437			0.289496	2.23086	2.90245			0.0613048	1.89674	2.94823			0.107174	1.71743	2.93478			0.0618612	1.91842	2.41747			0.168682	1.40656	1.66799			-0.0303459	0.223186	0.343001			0.154836	-0.0013306	0.0124895			-0.0943876	-0.0266869	0.0227945			0.0118577	-0.00234263	0.00952348
0.0552904	0.00781921	0.00604774			0.297308	2.20697	2.90656			0.0283252	1.87032	2.94594			0.116092	1.70277	2.94695			0.0769748	1.91569	2.42534			0.151789	1.41637	1.67779			-0.024053	0.225595	0.34768			0.155459	-0.00280905	0.0124393			-0.101778	-0.0286818	0.0226181			0.0342787	0.0025644	0.00901787
0.0707652	0.00856324	0.00577433			0.301008	2.18119	2.91502			0.0404625	1.84382	2.94491			0.0570288	1.68386	2.95126			0.0439161	1.91148	2.43046			0.13241	1.4215	1.68715			-0.0160473	0.229947	0.351388			0.172415	-0.00251336	0.0121446			-0.103445	-0.0290655	0.0227952			0.0023474	0.00472926	0.00829403
0.0708827	0.00672505	0.00560437			0.30304	2.15911	2.91727			0.029362	1.82156	2.94842			0.052054	1.66242	2.95467			0.0474064	1.90919	2.43322			0.149703	1.42431	1.69792			-0.0200133	0.231269	0.353662			0.173576	-0.00384396	0.012113			-0.0892436	-0.0279913	0.0233744			0.0150942	0.0014098	0.00827149
0.0646487	0.00556525	0.00538808			0.338404	2.13505	2.91339			0.022955	1.79831	2.9402			0.0691472	1.64116	2.95614			0.020563	1.90585	2.43832			0.153375	1.43208	1.70884			-0.0129202	0.233134	0.359441			0.213713	-0.00643123	0.0115649			-0.0919175	-0.0254592	0.0237592			0.0218934	-0.000466415	0.00756651
0.0687081	0.00709706	0.0049237			0.327077	2.11143	2.91137			0.020025	1.77243	2.94062			0.0504322	1.62668	2.96243			0.0054495	1.90313	2.4415			0.146508	1.43857	1.71936			-0.0157311	0.239273	0.361782			0.213668	-0.00524848	0.0115802			-0.0967847	-0.0277611	0.0240623			0.0122875	-0.00104371	0.00693021
0.0636965	0.0070533	0.0046422			0.326237	2.09153	2.91619			0.0225365	1.74647	2.94482			0.0596695	1.60823	2.96285			-0.0318941	1.89979	2.44878			0.128724	1.4431	1.73741			-0.0312416	0.244868	0.364268			0.195012	-0.00672692	0.0113948			-0.10002	-0.024385	0.0237673			-0.0149979	-0.00169317	0.00632738
0.0661055	0.00392402	0.00416152			0.309116	2.06909	2.92163			0.017913	1.71978	2.94932			0.0763591	1.58697	2.963			-0.0102925	1.89479	2.44609			0.140016	1.44976	1.75155			-0.0348862	0.247899	0.368173			0.18378	-0.0124189	0.0112972			-0.0971246	-0.0259963	0.0246284			-0.0416364	-0.00284776	0.00605523
0.08012	0.00438356	0.00363			0.302785	2.0462	2.91463			0.0221494	1.69608	2.94687			0.0611837	1.57023	2.96108			-0.0174502	1.89153	2.45294			0.134991	1.45701	1.75813			-0.030792	0.249065	0.376938			0.162655	-0.0144888	0.0113698			-0.0880443	-0.0251523	0.0243413			-0.065234	-3.34373e-05	0.00643122
0.0643958	0.00779733	0.00296734			0.314525	2.0196	2.91943			0.0294217	1.67092	2.94884			0.0678167	1.55096	2.96833			-0.0140972	1.88679	2.4594			0.135275	1.46256	1.7706			-0.0390185	0.253184	0.378518			0.139144	-0.00909243	0.011647			-0.0486914	-0.0256126	0.0232873			-0.0379138	-0.00306425	0.00674343
0.0622952	0.0084757	0.00237373			0.301332	2.00042	2.92106			0.0167595	1.64822	2.95643			0.0762203	1.53196	2.97471			-0.0212075	1.88354	2.46408			0.132568	1.46948	1.77879			-0.0621988	0.259712	0.385416			0.139016	-0.00924028	0.0122653			-0.0504939	-0.020702	0.022581			-0.0424656	-0.00486831	0.00645532
0.0665333	0.00784109	0.00181862			0.310233	1.97889	2.92413			0.0316658	1.62026	2.94868			0.0621276	1.51215	2.97591			0.00445993	1.88187	2.46787			0.149131	1.47989	1.78397			-0.0174396	0.267716	0.389843			0.147974	-0.012345	0.0130294			-0.0372122	-0.0194743	0.0222233			-0.030394	-0.0039302	0.00620354
0.0797767	0.0100951	0.00125152			0.322883	1.9532	2.93007			0.0470045	1.59221	2.95183			0.0748487	1.49767	2.97025			-0.0147272	1.87651	2.47959			0.160752	1.48647	1.80004			-0.00281724	0.272612	0.397551			0.15966	-0.00768791	0.0133694			-0.0201666	-0.0228504	0.0218574			-0.0590583	0.000183041	0.00565848
0.0820047	0.00994187	0.0009083			0.322713	1.93085	2.93082			0.0606858	1.56688	2.95537			0.113201	1.47858	2.97471			-0.027453	1.87282	2.47663			0.176891	1.49048	1.81279			-0.0159677	0.277663	0.405215			0.151895	-0.00620947	0.0137891			-0.0490415	-0.0228504	0.0218124			-0.0155556	0.00436845	0.00515295
0.0812167	0.00924161	0.000330331			0.317372	1.90769	2.93107			0.0436202	1.54119	2.9569			0.0991126	1.45533	2.97073			-0.0634882	1.86641	2.49065			0.141753	1.49688	1.83122			-0.00428207	0.282171	0.408863			0.159558	-0.00524848	0.0140686			-0.0481547	-0.0230038	0.0226256			-0.0275295	0.00357467	0.00438444
0.0783282	0.0114518	-0.00012525			0.309164	1.88254	2.93002			0.0353374	1.51866	2.96155			0.087824	1.4338	2.97284			-0.0672859	1.86544	2.49269			0.178676	1.5067	1.85022			0.00971245	0.2866	0.412069			0.177093	-0.00118276	0.0146171			-0.0657458	-0.0203183	0.022631			-0.0225411	0.00472926	0.00338458
0.0969533	0.0143841	-0.000501639			0.287004	1.85603	2.92746			0.0476964	1.48962	2.94964			0.0820805	1.41842	2.96901			-0.0769595	1.86079	2.49268			0.184757	1.51387	1.87107			0.0127222	0.293983	0.415661			0.169364	0.00303081	0.014937			-0.0731646	-0.0201649	0.0222782			-0.0536433	0.00631683	0.00280982
0.0982583	0.0120426	-0.000966631			0.314614	1.83405	2.92276			0.0460805	1.46392	2.95588			0.0713897	1.39833	2.96485			-0.0775909	1.85692	2.49787			0.202784	1.51669	1.8873			0.0180159	0.302298	0.423895			0.189554	0.00170021	0.0148953			-0.0783302	-0.020395	0.0226503			-0.0680385	0.00631683	0.00287538
0.0861934	0.0101169	-0.000939818			0.305281	1.81061	2.92657			0.0569163	1.44049	2.95361			0.0721047	1.37807	2.96631			-0.0920099	1.85455	2.50498			0.175922	1.526	1.90795			0.02205	0.305951	0.430954			0.197379	-0.00251336	0.0144702			-0.090766	-0.0220064	0.0225878			-0.0923553	0.00761575	0.00208403
0.0770611	0.00928538	-0.000749187			0.298072	1.78012	2.92533			0.0642199	1.41507	2.95603			0.0654756	1.36052	2.96055			-0.0767093	1.84515	2.51812			0.177301	1.52967	1.91701			0.0510386	0.308438	0.440259			0.217852	-0.00303082	0.0145828			-0.0803239	-0.020395	0.0221723			-0.0672231	0.0107187	0.00104644
0.0703022	0.00952609	-0.000698423			0.306549	1.75506	2.92874			0.0644837	1.39173	2.95426			0.0794679	1.33998	2.95886			-0.0993867	1.84058	2.5243			0.157823	1.53385	1.92719			0.0554584	0.311235	0.447471			0.252328	-0.000147846	0.0150227			-0.0883475	-0.0204718	0.0216472			-0.0627888	0.00819304	0.000701261
0.0687072	0.00788486	-0.000646957			0.298398	1.73335	2.92537			0.0672149	1.36893	2.9556			0.0523628	1.31808	2.95751			-0.0769467	1.83478	2.53241			0.170137	1.54017	1.93958			0.041186	0.315354	0.45951			0.231614	-0.00384395	0.014355			-0.0978429	-0.0179397	0.0214384			-0.0524969	0.00328602	0.0011965
0.0716329	0.00832252	-0.00061297			0.281545	1.70847	2.91574			0.103423	1.34342	2.95339			0.0754747	1.29981	2.95162			-0.0778781	1.82863	2.53263			0.151477	1.54546	1.94751			0.0615797	0.323359	0.465246			0.225416	-0.0053224	0.0140422			-0.0848901	-0.0188605	0.0213158			-0.0508321	0.00335818	0.00152379
0.0802747	0.00810369	-0.000361224			0.246756	1.68332	2.91874			0.0696118	1.31836	2.95232			0.098068	1.28606	2.95152			-0.0724249	1.82205	2.53565			0.135672	1.55169	1.95592			0.0990312	0.326389	0.472339			0.191284	-0.0059877	0.013311			-0.0848022	-0.0160215	0.0204259			-0.0813365	0.00371899	0.0012422
0.0794522	0.00652811	0.000397655			0.245293	1.65998	2.91148			0.0471848	1.29302	2.95173			0.143313	1.26661	2.95072			-0.0680143	1.81475	2.54124			0.16094	1.55485	1.9648			0.102391	0.333539	0.481383			0.171202	-0.00960989	0.0125614			-0.0613371	-0.0164818	0.0207984			-0.0779586	0.00299737	0.000990068
0.0698061	0.00497441	0.000616252			0.261761	1.63455	2.90783			0.0583929	1.26878	2.9468			0.134718	1.24381	2.9557			-0.0629835	1.80887	2.55203			0.16316	1.56433	1.97675			0.0815659	0.335016	0.48784			0.187583	-0.0111623	0.0120151			-0.0800742	-0.013873	0.0199833			-0.0758542	0.00242007	0.000706714
0.0684974	0.00948233	0.00126716			0.263278	1.60922	2.90357			0.0331711	1.24589	2.94326			0.117196	1.22825	2.95278			-0.093329	1.8	2.55621			0.179707	1.56979	1.99208			0.072474	0.339212	0.494951			0.200859	-0.00657908	0.0113308			-0.105847	-0.0146403	0.0192081			-0.0756852	0.00242007	0.000296247
0.0651132	0.0102482	0.00159041			0.259447	1.58697	2.90062			0.0446304	1.222	2.93761			0.13765	1.21106	2.95263			-0.109202	1.79464	2.56059			0.172878	1.57586	2.00941			0.0768266	0.346672	0.504343			0.239016	-0.00606162	0.0103607			-0.108053	-0.0123385	0.019182			-0.090053	0.000327373	-0.000411932
0.0640869	0.0088696	0.00226859			0.269099	1.56752	2.89934			0.046064	1.19622	2.94365			0.12457	1.19097	2.95236			-0.109058	1.79042	2.56615			0.154111	1.5826	2.02402			0.0784057	0.356309	0.507707			0.242505	-0.00717046	0.00949556			-0.107481	-0.0110341	0.0190844			-0.114158	0.00126548	-0.000577599
0.0700396	0.00954798	0.00307427			0.26566	1.542	2.90251			0.0465533	1.16917	2.9488			0.0894149	1.1746	2.94995			-0.0971444	1.78278	2.57356			0.140167	1.5902	2.03503			0.0597362	0.362759	0.512685			0.225636	-0.00413965	0.00927711			-0.1263	-0.0133359	0.0186381			-0.114437	0.00725494	-0.000752792
0.0562522	0.0108828	0.00381397			0.269675	1.51586	2.90648			0.0503566	1.1432	2.95074			0.0933808	1.15741	2.95378			-0.121292	1.7739	2.57015			0.132081	1.59856	2.04474			0.0762517	0.367033	0.521081			0.237745	-0.00162629	0.00900531			-0.141283	-0.0118781	0.018662			-0.0835492	0.0104301	-0.000605423
0.0481269	0.0104233	0.00436399			0.254569	1.49107	2.90872			0.0638417	1.12022	2.95208			0.0798469	1.13352	2.94827			-0.14589	1.76793	2.57418			0.150107	1.60181	2.05007			0.104036	0.371774	0.524456			0.242575	0.000147847	0.0087905			-0.148418	-0.0115712	0.0188526			-0.0760789	0.00905899	-0.000264933
0.0616736	0.0109704	0.00466257			0.224363	1.467	2.91054			0.0675848	1.09806	2.95304			0.0798393	1.11117	2.9447			-0.148664	1.76327	2.58069			0.152753	1.60779	2.06349			0.111379	0.379701	0.533432			0.228165	0.000591376	0.00900968			-0.147148	-0.00972966	0.0187073			-0.0729509	0.00703845	-0.000389283
0.0728484	0.0131806	0.00467652			0.247346	1.4395	2.9076			0.106877	1.07281	2.94779			0.101838	1.09905	2.94003			-0.136784	1.75818	2.58487			0.153181	1.61709	2.07817			0.106295	0.387161	0.546345			0.238665	0.00591378	0.00909273			-0.133517	-0.0117246	0.0184976			-0.0920333	0.0101414	-0.000799317
0.0700638	0.0109485	0.00486135			0.205878	1.41733	2.90121			0.0829832	1.04748	2.94665			0.0987001	1.0787	2.94315			-0.114029	1.74852	2.59152			0.171163	1.62196	2.08826			0.118982	0.395399	0.54971			0.220266	0.00591378	0.00936259			-0.134135	-0.00857872	0.0182284			-0.0599458	0.0127393	-0.000402088
0.0818813	0.00779733	0.00510336			0.173342	1.39164	2.89548			0.0787672	1.02523	2.94262			0.0772243	1.05734	2.94115			-0.0868336	1.74193	2.59948			0.154239	1.62529	2.0999			0.130782	0.39773	0.555303			0.20544	0.0013306	0.00935572			-0.0909822	-0.00727432	0.0173226			-0.0443312	0.00920332	-0.000558689
0.0735871	0.00569655	0.00522922			0.155186	1.36296	2.89565			0.0668819	1.00433	2.93822			0.0435067	1.03952	2.94372			-0.101513	1.73376	2.60359			0.14095	1.63109	2.10332			0.163792	0.400683	0.558194			0.194646	0.0019959	0.00902893			-0.0490389	-0.00466552	0.017565			-0.0350694	0.0113682	-0.000430109
0.0864441	0.00768791	0.00536381			0.160188	1.3379	2.89718			0.0639468	0.980443	2.93089			0.0350709	1.01953	2.9452			-0.118484	1.72207	2.61105			0.139047	1.63715	2.11666			0.186377	0.405424	0.566897			0.205184	0.00243944	0.00845165			-0.0546352	-0.00405168	0.0182458			-0.0278318	0.0107187	-0.000612328
0.0886079	0.00661564	0.00546935			0.159414	1.31673	2.89962			0.056338	0.959905	2.92296			0.0352334	1.00179	2.9418			-0.121223	1.71469	2.61841			0.125145	1.63903	2.12642			0.190177	0.409776	0.573607			0.20575	-0.000369611	0.00904008			-0.0579355	-0.00259382	0.0199962			-0.0358962	0.00653332	0.00013253
0.0699768	0.00471181	0.00616755			0.158572	1.29357	2.89912			0.064035	0.937921	2.91931			0.0602569	0.980985	2.94338			-0.112158	1.70608	2.62236			0.120305	1.64287	2.14361			0.180598	0.417469	0.580917			0.203721	-0.0033265	0.0102993			-0.0279283	-0.00113597	0.0215779			-0.0556852	0.00487359	0.000622849
0.0651921	0.00440544	0.00657191			0.127473	1.26841	2.89993			0.0726401	0.912679	2.91349			0.0486788	0.967053	2.93217			-0.120599	1.69783	2.62455			0.113412	1.64979	2.15822			0.175251	0.421277	0.585343			0.217617	-0.00354827	0.0123687			-0.0196419	-0.00213345	0.0225868			-0.0430182	0.00747143	0.00113504
0.073447	0.00462427	0.00713684			0.137298	1.24743	2.90112			0.0975077	0.890423	2.91521			0.0727631	0.948325	2.92202			-0.126087	1.68553	2.63905			0.140924	1.65397	2.16773			0.150603	0.426872	0.588196			0.183139	-0.00421357	0.0139475			-0.025014	-0.00236364	0.0230009			-0.0239802	0.00754359	0.00181904
0.0710472	0.00234843	0.00792045			0.146614	1.22255	2.8968			0.0882466	0.869976	2.91091			0.110756	0.926883	2.91427			-0.153549	1.67578	2.63302			0.120659	1.65799	2.17297			0.147286	0.430603	0.593167			0.199562	-0.00606162	0.0149047			-0.0134241	-0.00113597	0.023022			-0.0109064	0.00343034	0.00233235
0.0604782	0.00429603	0.00943343			0.17813	1.19712	2.89592			0.0882891	0.850344	2.90411			0.135227	0.909151	2.9191			-0.143182	1.66717	2.62794			0.159156	1.66362	2.1853			0.152699	0.435421	0.600951			0.19332	-0.00524848	0.0160882			-0.0194628	0.00346779	0.023039			-0.0125912	0.00343034	0.00228001
0.073274	0.006922	0.0104882			0.190491	1.17749	2.89023			0.0951259	0.823293	2.90955			0.112216	0.89567	2.9152			-0.124322	1.65856	2.63087			0.164313	1.66977	2.19506			0.154861	0.445757	0.606736			0.186841	-0.00236551	0.0173024			0.010263	0.00247031	0.0231323			-0.00316939	0.00422413	0.00180685
0.0835949	0.00547772	0.0115346			0.193433	1.15596	2.88963			0.0693705	0.804927	2.90597			0.0945108	0.877666	2.90877			-0.126314	1.65083	2.63038			0.170281	1.67549	2.19738			0.15819	0.455549	0.614901			0.213059	-0.00377003	0.0165254			0.0227243	0.00523257	0.0241678			-0.00710584	0.0052344	0.0015521
0.0850097	0.00289551	0.0124121			0.202747	1.13207	2.8882			0.0684121	0.780138	2.90866			0.0911552	0.858486	2.90558			-0.119959	1.64046	2.63535			0.159634	1.67882	2.19997			0.140386	0.461377	0.623793			0.189237	-7.39225e-05	0.0167516			0.0234399	0.00247031	0.0249726			-0.0223871	0.00718278	0.00138441
0.0834188	0.00584973	0.0129853			0.235573	1.10647	2.88372			0.0814412	0.758243	2.89875			0.0914703	0.84193	2.91185			-0.129653	1.62922	2.63598			0.14584	1.68718	2.21356			0.140048	0.466506	0.626482			0.172398	0.000369611	0.0169713			0.0122284	0.0040049	0.0254551			-0.019495	0.0124506	0.000364693
0.0847984	0.00751285	0.0140791			0.230851	1.08304	2.88122			0.0708355	0.737706	2.89334			0.12869	0.822931	2.90994			-0.104738	1.62166	2.64364			0.131198	1.69103	2.22541			0.121475	0.471324	0.633197			0.181446	0.00532239	0.0172464			0.0449657	0.00308415	0.0267026			-0.0300033	0.0116568	-0.000176951
0.079232	0.00552148	0.0147648			0.210668	1.06042	2.87727			0.0726385	0.716807	2.89039			0.11935	0.800675	2.91062			-0.105924	1.61261	2.65142			0.135099	1.6912	2.23841			0.10824	0.47964	0.641344			0.182812	0.00524848	0.0176978			0.0323735	0.00707408	0.027272			-0.0126052	0.00776007	-0.000387881
0.0555067	0.00473369	0.0154713			0.198071	1.03644	2.87516			0.0668522	0.695546	2.89316			0.106807	0.784933	2.90528			-0.0985481	1.60506	2.65071			0.120882	1.70033	2.25254			0.100276	0.487256	0.647138			0.189775	0.00783576	0.0198431			0.0432505	0.0058464	0.0270137			-0.0435229	0.0102858	-0.000804727
0.0490154	0.0053683	0.0161954			0.223388	1.0141	2.87302			0.082526	0.674104	2.8943			0.0884732	0.771362	2.89804			-0.0978616	1.59276	2.65684			0.108736	1.70622	2.26631			0.111048	0.496503	0.655468			0.176021	0.00746615	0.0229721			0.0089385	0.00576968	0.0268167			-0.0509612	0.0142547	-0.0013634
0.040177	0.00177947	0.0170049			0.213258	0.990395	2.86769			0.0432603	0.653477	2.90171			0.0832622	0.75001	2.89			-0.0818136	1.58116	2.65316			0.109929	1.7046	2.27575			0.114789	0.499068	0.660365			0.180544	0.00510064	0.0251402			-0.0195776	0.00446528	0.0269387			-0.0591078	0.0114403	-0.00184483
0.0378169	-0.000343193	0.017653			0.23329	0.966058	2.86232			0.0642461	0.638097	2.90353			0.0803553	0.731102	2.88075			-0.0804351	1.57036	2.64834			0.130635	1.71024	2.27877			0.104157	0.502254	0.670188			0.173971	0.00428749	0.0279559			-0.0269151	0.00814829	0.0280297			-0.0716492	0.0107909	-0.00231508
0.052631	0.0004446	0.0181161			0.230836	0.940635	2.86137			0.0933874	0.616926	2.89877			0.0717705	0.710927	2.873			-0.0894955	1.557	2.64925			0.170829	1.71263	2.28373			0.0886826	0.508238	0.673723			0.177827	0.00362219	0.0291033			-0.00724697	0.00699736	0.0285958			-0.0714093	0.0101414	-0.00249147
0.0531232	0.00138557	0.0186705			0.241539	0.919917	2.86078			0.0803169	0.598199	2.89147			0.0770366	0.697175	2.87115			-0.065379	1.54787	2.64908			0.140575	1.71339	2.2883			0.0844767	0.514611	0.679137			0.154505	0.00628339	0.0319642			-0.0125111	0.00937596	0.028459			-0.061072	0.00653332	-0.00275035
0.0612291	-0.0026628	0.0191811			0.223771	0.900375	2.86004			0.0599961	0.578023	2.891			0.0747475	0.67908	2.8672			-0.0555826	1.53557	2.65267			0.149461	1.71348	2.29219			0.076808	0.523392	0.687017			0.162451	0.000960992	0.0349419			-0.0312653	0.0124451	0.0297975			-0.0908334	0.00516223	-0.00350977
0.0585515	-0.00463228	0.0198916			0.220354	0.879385	2.85961			0.0535947	0.56011	2.87911			0.0685488	0.661981	2.85992			-0.0622527	1.52432	2.66041			0.168364	1.72057	2.29712			0.0714895	0.525879	0.694865			0.141466	-0.00354827	0.039724			-0.0440894	0.00983634	0.0302189			-0.0351112	0.00747142	-0.00412912
0.0499681	-0.00226891	0.0199442			0.22277	0.856406	2.86364			0.0672711	0.539573	2.87429			0.0753991	0.64841	2.85188			-0.0569936	1.5115	2.6661			0.182296	1.72253	2.30281			0.0656402	0.532096	0.706665			0.151844	-0.00236551	0.0417136			-0.0241423	0.0112942	0.0306222			-0.0234388	0.00739926	-0.00426259
0.0411364	-0.00312235	0.0201484			0.246005	0.836321	2.86635			0.083017	0.521388	2.87003			0.0922022	0.626788	2.84674			-0.0673949	1.49981	2.67116			0.185708	1.72202	2.31805			0.0717358	0.538313	0.71268			0.13913	-0.00162629	0.0476913			-0.0123014	0.0122149	0.0312028			-0.034822	0.00299737	-0.00437324
0.0303601	-0.00248774	0.0203573			0.250805	0.817774	2.86728			0.0794954	0.504922	2.86884			0.0687996	0.610684	2.85057			-0.0641713	1.48945	2.66945			0.168312	1.72782	2.31994			0.058654	0.544841	0.722053			0.147329	-0.00125668	0.0517078			0.0090844	0.0181231	0.0314461			-0.0650942	0.00184278	-0.00464629
0.0291305	-0.00145923	0.0205551			0.219332	0.796242	2.86274			0.0787199	0.481218	2.86169			0.0701648	0.597565	2.83937			-0.0502662	1.47803	2.67627			0.202865	1.73295	2.3186			0.0560814	0.554633	0.728734			0.162619	0.00110883	0.0561835			0.02084	0.0168187	0.0324765			-0.085937	0.00415197	-0.00464351
0.0337619	-0.00104345	0.0207114			0.219522	0.777876	2.86318			0.0687656	0.463033	2.85722			0.0513599	0.581552	2.83331			-0.0898418	1.46546	2.67351			0.203982	1.73508	2.32371			0.0673363	0.560772	0.734754			0.14996	0.00214374	0.0572004			0.0358548	0.0162816	0.0346796			-0.0874288	0.00379116	-0.00449135
0.0340028	-0.00220326	0.0208668			0.247739	0.756072	2.86364			0.0673514	0.444668	2.85515			0.0706235	0.564452	2.82571			-0.0671454	1.4558	2.67007			0.234012	1.73508	2.32756			0.076727	0.56831	0.747043			0.148688	0.00421357	0.0606765			0.0368657	0.0178929	0.0345455			-0.0864386	0.0067498	-0.00341427
0.05471	-0.00283787	0.0211635			0.218466	0.734268	2.86259			0.0414779	0.427478	2.85303			0.0722747	0.545815	2.82477			-0.0568022	1.4421	2.67728			0.235689	1.7408	2.34166			0.0600681	0.576237	0.752374			0.137084	0.00443533	0.0649118			0.0463772	0.0175093	0.0347358			-0.0861382	0.00891467	-0.00241769
0.0564089	0.00149499	0.0215104			0.226697	0.711379	2.86711			0.0477379	0.407212	2.84938			0.0647942	0.528083	2.81326			-0.0668311	1.42927	2.67172			0.275453	1.74276	2.34551			0.0369171	0.581366	0.757996			0.131177	0.0115319	0.0697715			0.0513175	0.0183533	0.0347161			-0.105673	0.00956413	-0.00178623
0.0529135	0.000313299	0.0220577			0.222549	0.692742	2.86214			0.0275902	0.387942	2.84113			0.0743165	0.511255	2.81362			-0.0696875	1.42128	2.67442			0.246814	1.74242	2.35445			0.0375992	0.592712	0.76051			0.126416	0.0147105	0.0728143			0.0642512	0.0205785	0.0359203			-0.0938627	0.00674981	-0.00054581
0.0503204	-0.000583909	0.0222765			0.245709	0.672747	2.86287			0.044215	0.371476	2.83546			0.0763851	0.493884	2.80826			-0.0424431	1.41021	2.67809			0.246364	1.74669	2.36581			0.0396657	0.599473	0.765146			0.137676	0.0111623	0.0772934			0.0978486	0.0191973	0.0382442			-0.092115	0.0079044	0.00071276
0.0489176	-0.00207196	0.0227795			0.213219	0.650944	2.85586			0.0427969	0.354738	2.82645			0.0575802	0.480042	2.80399			-0.0385548	1.39764	2.68151			0.265229	1.74746	2.37057			0.0224059	0.604214	0.771014			0.1252	0.0115319	0.0839308			0.126772	0.0190439	0.0393256			-0.0957474	0.0133166	0.00249301
0.0434981	-0.00285975	0.0228013			0.19449	0.628869	2.84381			0.0548315	0.337096	2.81953			0.0535252	0.461857	2.78824			-0.0490352	1.38262	2.68046			0.261491	1.74652	2.38017			0.0174979	0.609421	0.775172			0.148399	0.0143409	0.0879984			0.165159	0.0175093	0.0416433			-0.0982874	0.0105744	0.00481042
0.0321508	-0.00535443	0.0225431			0.204486	0.607155	2.84096			0.00973281	0.322802	2.81041			0.0566243	0.441139	2.78312			-0.0608099	1.36936	2.67713			0.244392	1.74524	2.38614			0.0473388	0.613306	0.782981			0.169669	0.0110144	0.0930092			0.151466	0.0218829	0.0448323			-0.101473	0.00783224	0.00691928
0.0450369	-0.00546384	0.0226885			0.190807	0.588428	2.82766			0.0205567	0.307964	2.80195			0.0368294	0.422864	2.77053			-0.0600673	1.35732	2.67518			0.233918	1.74643	2.3949			0.0636767	0.621155	0.792428			0.168341	0.00975773	0.0967938			0.155625	0.0211156	0.0461526			-0.100432	0.00559521	0.00795728
0.0528138	-0.00476358	0.0230557			0.166334	0.568071	2.81798			0.0198958	0.28978	2.79743			0.0456953	0.411193	2.75917			-0.0596339	1.34573	2.67666			0.22452	1.74652	2.40293			0.0661488	0.626129	0.804036			0.181919	0.0130842	0.0981779			0.146766	0.0227269	0.0480673			-0.0904117	0.00364683	0.00992837
0.0508944	-0.00625163	0.0234326			0.159538	0.553234	2.8103			0.0124481	0.272861	2.78962			0.0698166	0.397532	2.75643			-0.0638544	1.33105	2.6708			0.204092	1.74404	2.40989			0.07834	0.634056	0.815084			0.166181	0.0099795	0.101406			0.156353	0.0257193	0.050329			-0.105767	0.00242008	0.0115466
0.0659196	-0.00894326	0.0237506			0.174678	0.532697	2.80489			0.0131233	0.256124	2.78617			0.0951054	0.377718	2.74619			-0.0643486	1.31753	2.66407			0.204975	1.74498	2.41682			0.075788	0.637786	0.829795			0.171458	0.0059877	0.105408			0.144473	0.0218829	0.0555429			-0.106335	0.00133764	0.0121604
0.0732316	-0.006558	0.0239425			0.162528	0.511526	2.78957			0.0749437	0.24011	2.78328			0.123941	0.363605	2.73158			-0.0323721	1.30242	2.66093			0.202641	1.74404	2.425			0.0799004	0.642526	0.837976			0.145124	0.00894459	0.108718			0.140074	0.0252589	0.0582436			-0.115641	0.00155413	0.0134401
0.0863732	-0.00430404	0.0239557			0.16798	0.491803	2.77715			0.076078	0.224187	2.77367			0.110105	0.345963	2.72599			-0.0243352	1.28669	2.65831			0.180225	1.74268	2.42788			0.109033	0.649909	0.847708			0.156846	0.014267	0.113686			0.115168	0.0257193	0.0584016			-0.131668	0.00032737	0.0138238
0.0918996	-0.00443533	0.0244944			0.141628	0.47769	2.77324			0.0589756	0.210436	2.76928			0.113659	0.329406	2.71552			-0.0226212	1.27536	2.65893			0.147012	1.74114	2.43457			0.106033	0.659701	0.861222			0.13675	0.0146366	0.117747			0.11598	0.0316275	0.0622638			-0.160737	-0.0039302	0.0147333
0.0872909	-0.00498241	0.0244488			0.13622	0.461133	2.76832			0.0594589	0.189989	2.75971			0.112691	0.318278	2.70628			-0.022428	1.26473	2.66133			0.13527	1.74515	2.43861			0.119254	0.668482	0.874671			0.148765	0.0146366	0.12281			0.08967	0.0290954	0.064616			-0.171154	-0.000177768	0.0155928
0.0796951	-0.00237832	0.0242411			0.130571	0.439058	2.76238			0.0534502	0.173975	2.75776			0.102006	0.302355	2.69918			-0.010541	1.24953	2.66164			0.124038	1.74584	2.44742			0.147566	0.6747	0.885959			0.164731	0.0207721	0.1296			0.109331	0.0284049	0.0689557			-0.191418	0.00205926	0.016831
0.0651155	-0.00281598	0.0239036			0.146071	0.42404	2.75182			0.0559325	0.157238	2.75115			0.100796	0.285437	2.68694			-0.0199448	1.23618	2.66294			0.119285	1.74217	2.45691			0.131685	0.682471	0.895544			0.180625	0.0243943	0.139255			0.105565	0.0300929	0.0741931			-0.203671	0.00509007	0.0188764
0.0679925	-0.00391014	0.0238499			0.127867	0.405222	2.74563			0.0359145	0.144843	2.74496			0.115431	0.265262	2.67633			-0.0142366	1.22414	2.66825			0.127779	1.74191	2.46275			0.10592	0.688999	0.901026			0.169571	0.0236551	0.144039			0.108788	0.0309369	0.078399			-0.20795	0.0040798	0.0213802
0.0628403	0.000225769	0.023411			0.134367	0.384594	2.73771			0.0223997	0.127835	2.73647			0.120463	0.248343	2.66661			-0.00387583	1.20903	2.67051			0.130193	1.74012	2.46818			0.0963931	0.694827	0.908654			0.1514	0.0330432	0.152435			0.0896402	0.0304765	0.0824817			-0.202075	0.00545088	0.0232401
0.0737951	0.00066343	0.0228457			0.139318	0.365324	2.73122			0.00318442	0.110374	2.73055			0.108137	0.23622	2.65195			-0.0135124	1.19981	2.67709			0.0969458	1.73807	2.47563			0.0996525	0.70423	0.920201			0.141593	0.0372568	0.15888			0.0916202	0.0350036	0.0870953			-0.21204	0.00458494	0.0260121
0.0628745	-0.00222514	0.0224459			0.12753	0.350034	2.72623			-0.0231275	0.0958076	2.72728			0.0947291	0.216407	2.63984			-0.0171812	1.18777	2.67413			0.120072	1.73585	2.4752			0.0923921	0.713634	0.929375			0.14339	0.0374786	0.163024			0.0752396	0.0339294	0.0913996			-0.209255	0.00270872	0.0277393
0.0755284	-0.0030567	0.0223184			0.133957	0.332301	2.71876			-0.0166826	0.081694	2.72058			0.0634191	0.200574	2.63008			-0.0139066	1.17345	2.67535			0.107717	1.73363	2.48436			0.0880076	0.717675	0.942152			0.124471	0.0358523	0.172025			0.0771365	0.0315508	0.0953111			-0.195851	0.00602818	0.0291127
0.0746155	-0.00231267	0.0223949			0.125247	0.30905	2.71234			-0.00305969	0.0690279	2.72065			0.0763559	0.184651	2.61705			-0.0323408	1.15781	2.67946			0.0969728	1.72996	2.49049			0.0806266	0.721949	0.949556			0.111402	0.0400658	0.177341			0.0749497	0.034313	0.10028			-0.204045	0.00653332	0.0314734
0.0782897	-0.00369131	0.0224447			0.112861	0.294213	2.70778			-0.0113803	0.0544619	2.71477			0.0706779	0.165833	2.60728			-0.0229547	1.14174	2.68485			0.079513	1.7239	2.49493			0.0743986	0.727622	0.959081			0.0946472	0.0445751	0.186805			0.0549125	0.0356174	0.10341			-0.170504	0.00299737	0.0329786
0.0709178	-0.00432592	0.0226001			0.109896	0.279285	2.70399			-0.0060079	0.0417054	2.70313			0.0729461	0.147829	2.59691			-0.0201332	1.12865	2.6876			0.113931	1.72065	2.50114			0.0612175	0.734461	0.97154			0.0719809	0.0411747	0.193322			0.052216	0.0401444	0.107465			-0.168236	0.000327366	0.0338754
0.0550277	-0.00393202	0.0226953			0.0981642	0.261009	2.69512			-0.00556679	0.0258728	2.69252			0.115569	0.133715	2.58751			-0.0335415	1.11451	2.68267			0.123147	1.71758	2.50594			0.0720769	0.741455	0.982602			0.0480188	0.0464971	0.200473			0.040647	0.0393004	0.111103			-0.146103	-0.000682902	0.0351383
0.0539026	-0.00395391	0.0235337			0.0966937	0.245901	2.68646			-0.0151689	0.0104925	2.68813			0.105003	0.122225	2.57683			-0.000373261	1.09992	2.68272			0.134508	1.71314	2.51179			0.0646949	0.749926	0.996704			0.0531862	0.0474581	0.205529			0.0241792	0.0415256	0.113739			-0.143645	0.00119331	0.0364054
0.0474873	-0.00546384	0.024439			0.0862073	0.230339	2.67478			-0.000715474	-0.00280683	2.67871			0.106613	0.104402	2.56778			-0.00532981	1.08402	2.68384			0.150974	1.70921	2.52323			0.0388998	0.754666	1.00734			0.0772795	0.0476059	0.214998			0.0137443	0.039991	0.117448			-0.122125	-0.00190966	0.0381186
0.0483609	-0.00572644	0.024833			0.0789397	0.211702	2.66716			0.0203533	-0.0141158	2.66942			0.110828	0.0848605	2.55559			-0.0135988	1.07102	2.67988			0.140348	1.70605	2.5288			0.0312004	0.75863	1.01104			0.0572262	0.0498975	0.225927			0.0427957	0.043674	0.121395			-0.100503	-0.00205399	0.0386024
0.0450587	-0.000233777	0.02554			0.0645044	0.194151	2.65534			0.0630893	-0.0304008	2.66172			0.0895109	0.0731896	2.54491			0.0265195	1.05661	2.67941			0.107631	1.70255	2.53412			0.0396471	0.767878	1.01947			0.0701654	0.0571419	0.235212			0.0467328	0.0458991	0.127244			-0.112777	-0.000827227	0.0390747
0.0546655	-0.000408842	0.0262523			0.0913261	0.182118	2.64097			0.0679999	-0.0437002	2.64817			0.0767201	0.0584427	2.53634			0.0523439	1.04141	2.67862			0.105704	1.69709	2.54124			0.0593304	0.775882	1.02693			0.0579606	0.0609858	0.24125			0.0560561	0.0499658	0.130927			-0.125513	-0.00320858	0.0394659
0.0696813	-0.000496374	0.0269308			0.0773546	0.169271	2.63467			0.0859758	-0.0601661	2.63726			0.0633161	0.0404388	2.52528			0.0421588	1.03105	2.68034			0.105551	1.69273	2.54581			0.0444131	0.78715	1.0393			0.0606071	0.0643863	0.247327			0.0320626	0.0511935	0.135266			-0.111363	-0.00313642	0.0398112
0.0677204	0.00118863	0.0283772			0.0565301	0.149186	2.63361			0.0570139	-0.0741892	2.62537			0.101349	0.0258728	2.51053			0.042597	1.01418	2.67723			0.0686753	1.69248	2.55433			0.0325992	0.793756	1.05419			0.0608865	0.0720002	0.251823			0.0241491	0.0508866	0.139772			-0.0959721	0.00191494	0.0402637
0.0551385	0.00296116	0.0292919			0.0397478	0.134439	2.63236			0.0429281	-0.0902028	2.61882			0.108795	0.0100402	2.49797			0.0616238	1.00056	2.67589			0.0947754	1.68505	2.56138			0.0351919	0.802149	1.06079			0.0506265	0.0789489	0.258363			0.0317886	0.0507331	0.143805			-0.0701792	0.00638899	0.0411004
0.0536384	0.00315811	0.0307145			0.0470331	0.116254	2.62221			0.0445373	-0.101874	2.60691			0.0764615	-0.0112207	2.49297			0.106131	0.98765	2.67159			0.0889282	1.68044	2.57519			0.0455126	0.810542	1.06893			0.0581589	0.0835321	0.265788			0.0213901	0.0539557	0.150238			-0.0593029	0.00444061	0.0419391
0.064446	0.00383648	0.0317707			0.0286701	0.100241	2.61577			0.0391772	-0.114992	2.59588			0.0579645	-0.0275962	2.48693			0.0919789	0.974034	2.67001			0.121626	1.67685	2.58006			0.0661843	0.819945	1.08076			0.0842093	0.0930681	0.278054			0.036791	0.0574086	0.15391			-0.0525648	0.0040798	0.0441688
0.0765388	0.00665941	0.0326821			0.0133149	0.0844082	2.60544			0.0568936	-0.128925	2.58462			0.0629388	-0.0382719	2.4881			0.10057	0.962877	2.67026			0.113769	1.67079	2.58223			0.0531715	0.827406	1.08476			0.0917662	0.098834	0.286534			0.0150668	0.0594803	0.159113			-0.0295283	0.00797656	0.0448088
0.0730173	0.00475557	0.0331306			-0.00277615	0.068847	2.59803			0.0386397	-0.1453	2.57246			0.0531806	-0.0558234	2.47629			0.0693928	0.947679	2.67314			0.0767192	1.6661	2.58947			0.0597536	0.836887	1.09619			0.0872423	0.103121	0.295368			0.0535971	0.0607847	0.164716			-0.0298115	0.00667764	0.0459566
0.083771	0.0016044	0.0336389			-0.00237524	0.0520192	2.5863			0.0491817	-0.155795	2.55906			0.0907213	-0.0746416	2.46651			0.0541976	0.933008	2.67159			0.0515689	1.65747	2.5975			0.0652589	0.84186	1.10574			0.109714	0.104748	0.301679			0.0477736	0.0601708	0.169813			-0.0199911	0.00754358	0.0465172
0.0825876	0.00337694	0.0343401			-0.032942	0.0310297	2.58266			0.0425286	-0.166018	2.54955			0.108415	-0.0907456	2.45591			0.0524617	0.918161	2.66824			0.0388992	1.65346	2.59937			0.0421099	0.845124	1.11456			0.0920967	0.113323	0.310525			0.033182	0.0631633	0.174631			-0.0184837	0.00949196	0.0482358
0.0869658	0.00418661	0.0352248			-0.0415092	0.0151971	2.57499			0.0459186	-0.17977	2.53584			0.107512	-0.10504	2.44661			0.052397	0.902875	2.67162			0.0701781	1.64612	2.60336			0.0471713	0.855382	1.11873			0.111669	0.118719	0.321469			0.0327854	0.0655419	0.180466			-0.0121912	0.0099971	0.0499035
0.0841179	0.00291739	0.0356677			-0.0744468	0.00108346	2.56159			0.0396149	-0.194336	2.52307			0.108937	-0.123949	2.43488			0.0443107	0.890489	2.68252			0.0603377	1.63801	2.60461			0.0140992	0.863775	1.12535			0.135099	0.119458	0.334922			0.0382219	0.0702224	0.185052			0.00868098	0.00429629	0.0515026
0.0700435	0.00254538	0.0363402			-0.0770162	-0.0124873	2.55161			0.0454347	-0.207183	2.51414			0.146017	-0.138243	2.42082			-0.00513693	0.876081	2.69112			0.0791093	1.63161	2.60933			0.00902904	0.87007	1.13712			0.145809	0.126555	0.343669			0.0471273	0.0730614	0.189421			0.0615041	0.00530656	0.0543853
0.0704875	0.00335505	0.0369041			-0.0806346	-0.0278676	2.53906			0.0382104	-0.221025	2.50044			0.131597	-0.150186	2.40603			-0.00928461	0.861059	2.68971			0.126866	1.62537	2.6161			0.0418935	0.879629	1.14183			0.156701	0.129068	0.355493			0.0516653	0.0735217	0.194964			0.0975351	0.00552305	0.0552119
0.0725881	0.00383648	0.0378211			-0.0845942	-0.0433383	2.52257			0.0498388	-0.234325	2.48515			0.102995	-0.167375	2.3953			-0.022003	0.844543	2.68547			0.135849	1.61632	2.62425			0.0483503	0.883126	1.14445			0.163484	0.134612	0.365408			0.0441631	0.0744425	0.202959			0.0802766	0.00610034	0.0574785
0.0706658	0.0036833	0.0383916			-0.0819414	-0.0607089	2.51106			0.0270396	-0.245091	2.46787			0.11019	-0.190627	2.37821			-0.0215926	0.830312	2.68396			0.106321	1.60932	2.63764			0.0539974	0.89113	1.16001			0.160277	0.142079	0.37498			0.0608529	0.0827293	0.211554			0.0985219	0.00573953	0.0601068
0.0581779	0.00786297	0.0392301			-0.0905176	-0.0746416	2.50382			0.00282509	-0.258571	2.45529			0.126329	-0.201664	2.35995			0.00700378	0.817661	2.67955			0.108127	1.60266	2.63796			0.0641508	0.900767	1.16652			0.167205	0.151171	0.384733			0.0500278	0.0857217	0.219538			0.101821	0.00790439	0.0626265
0.0547725	0.0107734	0.0404449			-0.0836989	-0.0866744	2.48949			0.00485522	-0.275942	2.43949			0.136013	-0.21424	2.348			0.00487959	0.803781	2.67406			0.0948274	1.5966	2.63756			0.071127	0.912502	1.17741			0.167548	0.160855	0.392491			0.0428734	0.0890211	0.227586			0.0817997	0.00905899	0.0649843
0.0570309	0.00843193	0.0420493			-0.0522564	-0.0997928	2.47967			-0.0223268	-0.289784	2.42506			0.153067	-0.231158	2.33486			0.00195706	0.789374	2.66957			0.110329	1.58738	2.64346			0.0644863	0.923381	1.18866			0.172997	0.167434	0.402393			0.0566978	0.093011	0.236563			0.0815499	0.00877034	0.0678206
0.0504087	0.0098981	0.0418394			-0.037651	-0.11834	2.47237			-0.0310258	-0.301455	2.4122			0.138638	-0.249886	2.32127			0.00364428	0.776899	2.66677			0.129718	1.58362	2.64126			0.0212504	0.930065	1.20063			0.141724	0.17527	0.411153			0.0660939	0.0945456	0.241838			0.0625807	0.0149763	0.0687664
0.0376496	0.0128961	0.0430217			-0.0338055	-0.134534	2.46073			-0.0196956	-0.316473	2.40333			0.126009	-0.264633	2.30912			0.0292281	0.760208	2.66098			0.121397	1.5756	2.63995			0.0194076	0.93939	1.21051			0.157651	0.187762	0.421896			0.0601152	0.0956965	0.252487			0.0516686	0.0195225	0.0715401
0.0469937	0.0148656	0.0434408			-0.0032144	-0.150276	2.44739			0.00284446	-0.329682	2.38711			0.0922258	-0.283179	2.29158			0.0560685	0.747382	2.66004			0.139264	1.56604	2.64212			0.0362253	0.946229	1.22526			0.123414	0.198038	0.431377			0.0655397	0.100991	0.256612			0.0297449	0.0190174	0.0743973
0.0511417	0.0148437	0.0443371			0.00831093	-0.166018	2.43643			0.041551	-0.34081	2.36875			0.0843429	-0.303988	2.27126			0.0434379	0.738421	2.66171			0.141972	1.55639	2.64994			0.0651704	0.958741	1.23392			0.135341	0.208017	0.442821			0.0649377	0.107052	0.261158			0.0183786	0.0182957	0.0755666
0.0426316	0.0161129	0.0451613			-0.00424325	-0.182032	2.43275			0.0395483	-0.356552	2.3513			0.0562507	-0.317016	2.25223			0.0375622	0.724453	2.66197			0.134009	1.5499	2.65091			0.057874	0.968222	1.25485			0.110718	0.216075	0.453629			0.057991	0.110659	0.269458			0.0131275	0.0239244	0.0794635
0.0420526	0.0164193	0.0463853			-0.0179543	-0.198679	2.41977			0.0517005	-0.371571	2.33496			0.0680411	-0.331401	2.23722			0.0469796	0.709606	2.65817			0.159443	1.54171	2.65038			0.0307046	0.975138	1.26548			0.12476	0.224724	0.462167			0.0733302	0.113268	0.275766			0.0272184	0.0263779	0.0839599
0.0456083	0.0133338	0.0474502			-0.0480188	-0.215597	2.41003			0.0520426	-0.38107	2.32335			0.0662498	-0.351124	2.21924			0.0649023	0.694408	2.65349			0.196802	1.52881	2.65439			0.0270864	0.981045	1.27479			0.104937	0.231081	0.469003			0.0680473	0.116567	0.28852			-0.0152182	0.025079	0.0893022
0.0392961	0.0134869	0.0480334			-0.0516113	-0.234144	2.39727			0.0495234	-0.391113	2.30463			0.0739779	-0.370937	2.2043			0.0875506	0.680352	2.6433			0.191509	1.52028	2.65835			0.0235794	0.98765	1.28767			0.0781678	0.23729	0.481009			0.0556923	0.121631	0.302968			-0.0277504	0.0266666	0.0923329
0.0417842	0.0170539	0.0487195			-0.0491365	-0.248891	2.37946			0.0796971	-0.407307	2.28667			0.0520372	-0.386227	2.19002			0.0770034	0.664891	2.64469			0.178486	1.51054	2.65926			0.0177283	0.996432	1.30048			0.0777244	0.248083	0.494527			0.0279706	0.126695	0.312426			-0.0324901	0.0274603	0.0945478
0.0316908	0.01666	0.051097			-0.0286245	-0.262552	2.3672			0.0747496	-0.417892	2.27299			0.0255045	-0.40215	2.17571			0.0764088	0.651713	2.63821			0.188722	1.49868	2.66175			0.0227609	1.00482	1.3136			0.0883902	0.255919	0.502767			0.0223345	0.135289	0.320779			-0.00489912	0.0238522	0.095047
0.027774	0.0137495	0.0519835			0.00128454	-0.274947	2.35338			0.0885494	-0.435172	2.25384			0.0312681	-0.418887	2.15819			0.0697486	0.638975	2.63096			0.169248	1.48835	2.66025			0.0245474	1.01337	1.32788			0.0989235	0.261685	0.514865			-0.00798511	0.139356	0.332551			0.0106475	0.025512	0.0999814
0.0262777	0.0150188	0.0529022			0.0102058	-0.290598	2.33812			0.0835692	-0.4463	2.23723			0.029007	-0.434991	2.1439			0.0466764	0.620439	2.62996			0.154898	1.47964	2.65641			0.0483315	1.01912	1.3411			0.0934274	0.268855	0.52822			0.00850114	0.143269	0.340434			0.0437998	0.0309963	0.105176
0.0259019	0.0180605	0.0536234			0.0363124	-0.309054	2.3251			0.100966	-0.461228	2.22386			0.00847419	-0.451095	2.12732			0.0293642	0.605944	2.62458			0.144078	1.46811	2.65204			0.0527187	1.02519	1.35016			0.0842142	0.280535	0.54011			-0.0200751	0.147412	0.348793			0.0604659	0.0311406	0.108861
0.0242048	0.0186732	0.0562574			0.0305911	-0.322263	2.31133			0.0911212	-0.47299	2.20898			0.0222479	-0.471723	2.11935			0.0520042	0.59382	2.61422			0.140751	1.45454	2.65015			0.0382812	1.03397	1.35838			0.0633178	0.291106	0.550819			-0.0141127	0.155239	0.354833			0.0371396	0.0294809	0.11351
0.0269176	0.0206646	0.0582288			0.053433	-0.335744	2.29519			0.084642	-0.486651	2.19736			0.0305228	-0.486199	2.10502			0.0232294	0.581434	2.61288			0.143368	1.44626	2.64854			0.0487625	1.04368	1.36568			0.0637526	0.300568	0.565466			-0.00226536	0.163449	0.365518			0.0406471	0.0304912	0.118412
0.0208936	0.0242315	0.0614566			0.0485802	-0.349767	2.27667			0.0746913	-0.505921	2.18362			0.0315139	-0.499769	2.09089			0.0336495	0.564391	2.60867			0.146244	1.43857	2.64739			0.0708531	1.05441	1.37432			0.0537724	0.312691	0.575126			-0.0162355	0.167439	0.37648			0.0343187	0.0374187	0.119782
0.0287463	0.0249756	0.0643631			0.0338271	-0.362976	2.26642			0.0830096	-0.519311	2.17063			0.047704	-0.518769	2.07977			0.0278954	0.551038	2.60425			0.131743	1.42542	2.65113			0.0656748	1.06536	1.38462			0.050793	0.325775	0.585727			-0.0206022	0.175725	0.386038			0.0233267	0.0396558	0.12333
0.0415066	0.0250631	0.068243			0.0498338	-0.379532	2.25155			0.044819	-0.534239	2.15319			0.062303	-0.538853	2.06971			0.00834219	0.539617	2.59984			0.114142	1.41475	2.65199			0.039138	1.07189	1.39957			0.0711305	0.335533	0.597453			-0.0261588	0.182017	0.393679			0.0158586	0.0441298	0.128283
0.038495	0.0275797	0.0710635			0.0633255	-0.398531	2.24358			0.0554387	-0.546543	2.1338			0.0300835	-0.555048	2.05269			-0.00302072	0.523541	2.59228			0.10667	1.40545	2.64924			0.0307724	1.07935	1.41127			0.071784	0.349356	0.608729			-0.037671	0.186314	0.40887			-0.0146738	0.0508409	0.132204
0.043533	0.0324815	0.0761536			0.0579636	-0.416173	2.2327			0.0478585	-0.560838	2.11742			0.0519278	-0.57079	2.03976			-0.0215151	0.51256	2.58975			0.0873413	1.39102	2.64169			0.0165413	1.08984	1.42504			0.0485183	0.367024	0.619703			-0.0490403	0.195521	0.41943			-0.00916771	0.0524285	0.137248
0.0437273	0.032	0.0811364			0.03267	-0.42902	2.22008			0.0361255	-0.575585	2.10325			0.0299521	-0.591598	2.02708			-0.0115887	0.501578	2.58043			0.0840639	1.37779	2.64186			0.00739502	1.10267	1.4414			0.0303996	0.377373	0.628534			-0.0269363	0.206264	0.427345			-0.0173407	0.053583	0.144038
0.0489244	0.0315624	0.0862057			0.0265307	-0.444762	2.20856			-0.0153041	-0.590784	2.0841			0.0622992	-0.605169	2.01273			-0.00913336	0.488225	2.57443			0.0737594	1.36831	2.63769			0.0614375	1.11036	1.44842			0.0434196	0.384987	0.641067			-0.0320868	0.211098	0.437548			-0.049185	0.0579128	0.147202
0.0311971	0.032766	0.0891993			0.0292701	-0.462857	2.1923			-0.00571345	-0.606164	2.06694			0.0913877	-0.621907	1.99328			0.00963629	0.471358	2.57059			0.0636558	1.35661	2.64058			0.0292494	1.11689	1.45842			0.054827	0.398663	0.653037			-0.0492881	0.215548	0.44527			-0.0398013	0.0633971	0.152504
0.0306295	0.031628	0.0944315			0.0163011	-0.481946	2.17452			-0.00674297	-0.619011	2.04774			0.0594244	-0.641629	1.97622			0.00657969	0.457654	2.56624			0.039615	1.33971	2.63363			0.0239248	1.12334	1.4702			0.0389642	0.409012	0.663815			-0.0341224	0.223144	0.455556			-0.0180934	0.0632528	0.156407
0.0250823	0.0323939	0.0987443			0.0270435	-0.496693	2.15605			-0.0127015	-0.631949	2.03416			0.087622	-0.661986	1.96021			0.00753481	0.444125	2.56591			0.0286239	1.32921	2.62563			-0.0018281	1.12854	1.48376			0.0332667	0.4184	0.679749			-0.0406899	0.233809	0.471375			-0.0126064	0.0657063	0.160763
0.0187448	0.0347573	0.101619			0.0178856	-0.51325	2.13915			-0.0152657	-0.649139	2.01797			0.0970152	-0.678723	1.94526			-0.00254345	0.429981	2.56726			0.0232342	1.31495	2.62338			-0.00219019	1.1381	1.49389			0.0535065	0.429784	0.689819			-0.0399069	0.242633	0.485865			-0.034594	0.0659949	0.166149
0.0297992	0.0363767	0.105374			0.0342449	-0.530711	2.11958			-0.00575268	-0.662438	2.00035			0.0770274	-0.691841	1.92939			-0.0259921	0.414432	2.5577			0.00326577	1.30112	2.62037			0.0105181	1.14735	1.50799			0.0393635	0.443533	0.706246			-0.0497422	0.252531	0.500969			-0.0476246	0.067366	0.171557
0.0328908	0.0355889	0.109548			0.0365796	-0.54211	2.10499			-0.00979313	-0.68008	1.98311			0.0754334	-0.710841	1.9164			-0.0319051	0.399673	2.55461			0.0169901	1.28524	2.61478			0.0122578	1.15559	1.52104			0.0154911	0.452108	0.721204			-0.0586695	0.261202	0.509415			-0.0426945	0.0680155	0.183407
0.0340951	0.0347354	0.112982			0.0535561	-0.560024	2.08838			-0.000965754	-0.696636	1.96438			0.0804995	-0.730382	1.9009			-0.0650359	0.38588	2.54662			0.0236945	1.27482	2.62177			-0.00804417	1.16243	1.53806			0.0404311	0.462014	0.731171			-0.0611993	0.268107	0.523994			-0.031051	0.072706	0.188755
0.0337902	0.0392434	0.116335			0.0472346	-0.57839	2.06786			0.018639	-0.711202	1.94601			0.0787077	-0.746125	1.88383			-0.0773617	0.369365	2.5347			0.0304616	1.26082	2.62191			-0.00965558	1.16631	1.54215			0.0487842	0.476946	0.747937			-0.082623	0.277699	0.541243			-0.0505923	0.0766028	0.193944
0.040717	0.0429635	0.121018			0.0423044	-0.593046	2.04813			0.0328269	-0.725678	1.92873			0.0630398	-0.76259	1.87058			-0.0711652	0.356451	2.53236			0.0561621	1.24605	2.6311			-0.00262479	1.17626	1.55238			0.0480118	0.493135	0.758721			-0.0933684	0.289362	0.553283			-0.0211753	0.0773244	0.201362
0.0351939	0.043992	0.125683			0.0407554	-0.605079	2.03275			0.0157214	-0.742234	1.90947			0.0533575	-0.781771	1.85501			-0.060847	0.343273	2.52607			0.0376791	1.23521	2.63534			-0.0135226	1.18869	1.56043			0.0357667	0.503854	0.776026			-0.123233	0.301945	0.56966			-0.0381293	0.0788398	0.210746
0.0233708	0.0472745	0.131979			0.0430865	-0.622902	2.01733			0.0126496	-0.763043	1.89215			0.0436412	-0.796246	1.83709			-0.0806474	0.328602	2.52006			0.0418677	1.22052	2.64276			-0.0122803	1.19569	1.57723			0.0444931	0.517973	0.789885			-0.150238	0.309695	0.581898			-0.0247566	0.0864168	0.218396
0.00205759	0.0498129	0.136901			0.0353509	-0.638915	1.99868			0.043899	-0.778875	1.87202			0.0372112	-0.810269	1.81979			-0.065638	0.313844	2.51288			0.0300473	1.20874	2.63878			0.00837972	1.20789	1.58704			0.0365819	0.536306	0.805506			-0.156411	0.319133	0.592592			-0.0410503	0.0941382	0.225082
0.00850067	0.0514104	0.141051			0.0414554	-0.6552	1.98053			0.0292039	-0.797332	1.85283			0.0469989	-0.832344	1.80675			-0.0637107	0.301281	2.50927			0.0274087	1.19346	2.63689			0.0431757	1.21341	1.59754			0.0486419	0.551386	0.818538			-0.186671	0.328954	0.6061			-0.046179	0.100055	0.232577
0.0169742	0.0536424	0.145901			0.0121972	-0.673928	1.965			0.0258104	-0.812441	1.84105			0.0691737	-0.852701	1.79035			-0.0663061	0.28705	2.50135			0.0324537	1.18211	2.63075			0.054193	1.22071	1.61027			0.0605522	0.565801	0.83182			-0.198023	0.342151	0.614056			-0.0278409	0.102004	0.239003
0.0107936	0.0593321	0.151645			0.0346499	-0.692837	1.94455			0.0371295	-0.830444	1.8259			0.0870578	-0.866	1.77133			-0.0594222	0.274487	2.49751			0.050843	1.16828	2.63766			0.0344977	1.23175	1.62343			0.0672675	0.586942	0.844121			-0.186445	0.352433	0.627172			-0.0469293	0.108426	0.248988
0.00101045	0.0616736	0.158265			0.0411493	-0.707945	1.92374			0.0350272	-0.849534	1.80808			0.099701	-0.883009	1.75588			-0.0672441	0.261134	2.49192			0.0687123	1.15342	2.63277			0.0450259	1.24309	1.639			0.064499	0.599731	0.861762			-0.17619	0.366551	0.63848			-0.059314	0.111962	0.258796
0.014078	0.0599886	0.166099			0.0354452	-0.724321	1.90253			0.0177399	-0.865729	1.79075			0.0964354	-0.903636	1.74282			-0.0675462	0.245585	2.48426			0.0824979	1.13763	2.62519			0.0206027	1.25133	1.64862			0.0673797	0.610671	0.870809			-0.147595	0.378214	0.65056			-0.0837391	0.115931	0.26599
0.00281604	0.0619799	0.172883			0.0698862	-0.746306	1.88222			-0.00118585	-0.882194	1.77371			0.107032	-0.918564	1.72691			-0.0366547	0.230738	2.47972			0.107188	1.12414	2.62373			0.0230129	1.25568	1.66055			0.0903503	0.623534	0.883831			-0.132583	0.386424	0.659718			-0.084396	0.123003	0.273629
0.0085213	0.0649779	0.181487			0.0793451	-0.765667	1.86301			0.0206609	-0.896489	1.75601			0.118114	-0.939192	1.71185			-0.039661	0.214925	2.4708			0.0952843	1.10681	2.6251			0.00755172	1.26392	1.67368			0.0595356	0.642902	0.894364			-0.119264	0.398394	0.673934			-0.0955761	0.12791	0.281448
0.00431331	0.0660064	0.188609			0.0572605	-0.781951	1.84239			0.0293416	-0.913679	1.7385			0.15176	-0.955748	1.69656			-0.0309338	0.201133	2.46179			0.0717249	1.09033	2.61865			-0.0100387	1.26905	1.68542			0.0306178	0.654581	0.902387			-0.11757	0.412742	0.685746			-0.106002	0.129931	0.29387
0.0148372	0.0676476	0.196927			0.0829368	-0.797875	1.82383			0.0182248	-0.929783	1.71917			0.115958	-0.974838	1.6841			-0.0519306	0.185671	2.45611			0.0535588	1.07598	2.62134			-0.0255536	1.27791	1.69787			0.0179578	0.66737	0.917981			-0.132269	0.425173	0.700757			-0.123011	0.131157	0.305253
0.00750654	0.070208	0.206301			0.0845896	-0.816693	1.80763			0.0206814	-0.947877	1.70028			0.120443	-0.985966	1.66991			-0.0508485	0.171264	2.44171			0.0478593	1.06053	2.62859			-0.0151417	1.28576	1.7139			-0.00709969	0.682006	0.929038			-0.0947245	0.43837	0.720835			-0.12552	0.137291	0.314099
0.00361002	0.0723306	0.214002			0.0902369	-0.832978	1.7898			0.0194011	-0.968776	1.68002			0.147188	-1.00343	1.66149			-0.0853934	0.155275	2.43342			0.032904	1.04431	2.62759			-0.0207107	1.29485	1.72841			0.00373659	0.694351	0.939909			-0.0888173	0.45034	0.73335			-0.14475	0.141837	0.323477
-0.00772738	0.0734248	0.222142			0.107551	-0.850982	1.77304			-0.0060313	-0.98479	1.66113			0.108432	-1.02378	1.64892			-0.0655264	0.139287	2.43162			0.0272426	1.02903	2.61734			-0.017522	1.30013	1.73941			-0.0338254	0.709506	0.961431			-0.116381	0.463614	0.747071			-0.153025	0.144002	0.333739
-0.0116589	0.0786986	0.230504			0.092142	-0.871157	1.75386			-0.0310705	-1.00162	1.64301			0.107992	-1.03943	1.63378			-0.078371	0.123298	2.42497			0.0377544	1.01622	2.61008			0.000550133	1.30542	1.74882			-0.0637915	0.724881	0.979112			-0.0818494	0.479113	0.76225			-0.178565	0.151868	0.341667
-0.0278491	0.0856574	0.239951			0.0810173	-0.884547	1.73641			-0.00607268	-1.01971	1.62593			0.0952031	-1.05292	1.6184			-0.0691628	0.109769	2.41369			0.0393191	0.997952	2.6042			0.0195254	1.31544	1.75685			-0.0760358	0.747058	0.990629			-0.0690951	0.494152	0.778229			-0.183956	0.157641	0.350843
-0.0315494	0.0883491	0.248343			0.0779065	-0.897937	1.72243			-0.0271736	-1.03998	1.60709			0.0844263	-1.06911	1.60011			-0.0612687	0.0947469	2.40511			0.0254172	0.983182	2.60026			0.0143216	1.32803	1.76935			-0.065605	0.75992	1.00263			-0.0971003	0.509498	0.79784			-0.180535	0.162259	0.362176
-0.0277517	0.0895964	0.256923			0.0686573	-0.918202	1.70482			0.0193957	-1.06033	1.59006			0.0750189	-1.08648	1.58396			-0.0866872	0.0820087	2.39218			0.046007	0.968412	2.59285			0.0532222	1.3365	1.78191			-0.0623697	0.775962	1.01379			-0.109892	0.522542	0.808351			-0.200868	0.171929	0.376339
-0.0311916	0.0958331	0.265289			0.0587507	-0.937925	1.68904			-0.0140668	-1.08006	1.57209			0.0552272	-1.10005	1.56833			-0.0999435	0.0663714	2.38103			0.0209466	0.955606	2.58922			0.0633851	1.34552	1.79136			-0.0363364	0.797251	1.02916			-0.103273	0.534742	0.822182			-0.170015	0.181021	0.388373
-0.0465602	0.101019	0.274013			0.0677304	-0.955024	1.6735			0.0306409	-1.0996	1.55382			0.0373029	-1.12014	1.55298			-0.0843945	0.0516127	2.37062			0.00435835	0.938019	2.59082			0.0634068	1.35189	1.80566			-0.0424866	0.816175	1.0518			-0.110422	0.54886	0.833396			-0.1409	0.189176	0.400895
-0.0398494	0.103427	0.282759			0.0542064	-0.973119	1.65644			0.033561	-1.1167	1.53579			0.0192924	-1.13986	1.53748			-0.0982042	0.0401044	2.36441			0.0364309	0.920688	2.58828			0.0492346	1.36129	1.81784			-0.0497591	0.832512	1.06063			-0.10707	0.565357	0.842609			-0.153411	0.193145	0.410997
-0.0346973	0.110254	0.291288			0.0476452	-0.991846	1.63977			0.0236271	-1.13588	1.5195			0.0318507	-1.15334	1.52191			-0.123839	0.0267513	2.35963			0.0340045	0.906089	2.58876			0.0504933	1.37171	1.82895			-0.0437555	0.852619	1.08042			-0.109457	0.582007	0.855323			-0.144149	0.202237	0.424368
-0.023913	0.114368	0.302108			0.0802358	-1.0113	1.62435			0.0298001	-1.15515	1.50231			0.0383848	-1.16709	1.50707			-0.142407	0.0120804	2.35721			0.0395503	0.89166	2.59038			0.0409252	1.38204	1.84061			-0.0429368	0.869104	1.09372			-0.129954	0.598121	0.865663			-0.150522	0.213422	0.434159
-0.0372056	0.116097	0.312117			0.109565	-1.02858	1.60916			0.021689	-1.17406	1.48522			0.0603578	-1.18491	1.49291			-0.155196	-0.00452319	2.35556			0.0241883	0.871597	2.59478			0.0483227	1.39114	1.85209			-0.00667182	0.884627	1.11034			-0.0934856	0.60963	0.881147			-0.166362	0.216453	0.443125
-0.043012	0.118504	0.321828			0.101003	-1.05129	1.59251			0.0393909	-1.19233	1.46902			0.0510176	-1.20509	1.47729			-0.146758	-0.0193698	2.34552			0.0384542	0.854949	2.58718			0.0322818	1.39409	1.86336			0.0119191	0.897046	1.12378			-0.0875282	0.628352	0.895791			-0.18102	0.227277	0.458325
-0.0497548	0.123625	0.333498			0.0947102	-1.07219	1.57679			0.0449819	-1.20798	1.45424			0.0570819	-1.22011	1.46347			-0.127178	-0.0369397	2.33808			0.0568418	0.841033	2.58059			0.036603	1.40171	1.88516			-0.00277993	0.91671	1.13824			-0.0840677	0.64201	0.910393			-0.186011	0.235287	0.472421
-0.0523985	0.129183	0.343397			0.0984558	-1.08892	1.56248			0.0911182	-1.22689	1.44079			0.0310271	-1.23395	1.44866			-0.126136	-0.051347	2.33139			0.0679332	0.820201	2.56852			0.0528752	1.40808	1.89623			-0.0138894	0.934007	1.1506			-0.0885741	0.661039	0.927279			-0.161563	0.239834	0.483811
-0.0510873	0.132553	0.354359			0.109645	-1.10611	1.54549			0.080315	-1.24164	1.42519			0.0679938	-1.25032	1.43319			-0.109437	-0.0652273	2.32453			0.0706531	0.802529	2.56007			0.0314056	1.4174	1.92289			-0.0384251	0.946057	1.16973			-0.104026	0.67861	0.938218			-0.119559	0.243658	0.49653
-0.0424338	0.135945	0.366891			0.0901178	-1.12394	1.52933			0.118059	-1.26299	1.41085			0.0603347	-1.26399	1.41897			-0.0732265	-0.0798981	2.31559			0.0715177	0.786734	2.55049			0.0255236	1.42432	1.93185			-0.0287139	0.960989	1.18235			-0.0900139	0.693265	0.948901			-0.109301	0.255998	0.509399
-0.0335144	0.1417	0.379493			0.0809484	-1.14248	1.51339			0.120588	-1.28289	1.3951			0.0702984	-1.27593	1.40551			-0.0667065	-0.0979073	2.3018			0.0826454	0.771282	2.54308			0.0106281	1.43194	1.94213			-0.041457	0.976217	1.19747			-0.091827	0.709839	0.965064			-0.118878	0.263864	0.52343
-0.032886	0.146865	0.391271			0.0724336	-1.15985	1.49883			0.117372	-1.29828	1.38054			0.0818371	-1.2952	1.39253			-0.0640912	-0.114599	2.29046			0.0938534	0.75156	2.53079			0.020259	1.43691	1.95249			-0.0525276	0.994476	1.22064			-0.11621	0.725798	0.98703			-0.0839322	0.269709	0.536865
-0.0362994	0.153211	0.402235			0.07468	-1.17813	1.48275			0.106243	-1.31755	1.36344			0.0984057	-1.31076	1.3821			-0.038041	-0.126283	2.28276			0.09749	0.733973	2.52615			0.00509739	1.44344	1.9712			-0.0480038	1.01207	1.24011			-0.0896698	0.746055	1.00079			-0.103248	0.277358	0.549982
-0.0406977	0.162555	0.414692			0.0785201	-1.19523	1.46679			0.0880708	-1.33745	1.34858			0.0659693	-1.31963	1.36892			-0.0483778	-0.143062	2.26842			0.0604234	0.721337	2.51952			0.00763389	1.45315	1.98245			-0.0618954	1.03144	1.26324			-0.0894571	0.762628	1.01608			-0.0915913	0.289193	0.566092
-0.0502707	0.16971	0.428421			0.0328954	-1.21097	1.45024			0.121086	-1.35781	1.33325			0.0963248	-1.33229	1.35642			-0.0449405	-0.157381	2.26395			0.027679	0.704774	2.51171			0.0258578	1.46512	1.996			-0.0700623	1.05169	1.28169			-0.129913	0.781581	1.02909			-0.0690553	0.297852	0.578497
-0.0320652	0.173956	0.442105			0.0517707	-1.22988	1.4335			0.157243	-1.37581	1.31865			0.139352	-1.35129	1.34551			-0.0249764	-0.168011	2.25785			0.012683	0.686931	2.50841			0.0287334	1.47429	2.00529			-0.0368674	1.06515	1.29869			-0.110537	0.798308	1.04718			-0.0777777	0.310336	0.594937
-0.019782	0.180477	0.455881			0.0335032	-1.24788	1.41567			0.142375	-1.39481	1.30351			0.107488	-1.36387	1.33582			-0.0123828	-0.184615	2.24459			-0.00321971	0.674552	2.50221			0.00862461	1.4802	2.01331			-0.0442097	1.08725	1.31219			-0.0832819	0.813577	1.06529			-0.0793709	0.326284	0.608434
-0.0130116	0.191265	0.470564			0.0720606	-1.26751	1.39762			0.131244	-1.41399	1.28716			0.105052	-1.37789	1.32211			-0.0123918	-0.200516	2.23178			-0.0189248	0.658245	2.49719			0.00673985	1.48571	2.02467			-0.00773962	1.10987	1.32335			-0.0838033	0.830074	1.08391			-0.0934465	0.336459	0.622946
-0.0331071	0.198662	0.484828			0.0533868	-1.28443	1.37967			0.12666	-1.42901	1.27147			0.0821852	-1.39381	1.31121			-0.00137914	-0.211497	2.22143			-0.00492489	0.637755	2.48875			-0.0090497	1.49574	2.03317			-0.0291973	1.1282	1.33608			-0.0729893	0.851404	1.09349			-0.106855	0.346056	0.635971
-0.0375824	0.205052	0.499079			0.0540938	-1.30434	1.36274			0.114257	-1.44556	1.25638			0.045549	-1.40811	1.29975			-0.0088725	-0.223708	2.21087			-0.0304455	0.621961	2.48185			-0.0215923	1.50623	2.04377			-0.0291272	1.14668	1.35437			-0.0826756	0.86606	1.10761			-0.0898567	0.357241	0.654927
-0.0453825	0.212755	0.511683			0.0923955	-1.32379	1.34696			0.108185	-1.46691	1.24155			0.0221082	-1.41996	1.28872			-0.0134986	-0.238027	2.19638			-0.0197271	0.606081	2.4727			-0.0401472	1.51284	2.05792			-0.0288057	1.16317	1.36756			-0.0650652	0.885242	1.12411			-0.0857569	0.374344	0.671492
-0.0465864	0.218685	0.528606			0.101343	-1.34243	1.33108			0.0907612	-1.48293	1.22706			0.0334734	-1.43362	1.2773			0.031642	-0.255597	2.18782			0.00645107	0.588494	2.4668			-0.0223909	1.52107	2.06957			-0.0240088	1.18165	1.37887			-0.0733438	0.901202	1.13697			-0.0659417	0.383869	0.685761
-0.0477192	0.224659	0.540394			0.0810701	-1.36287	1.31456			0.121272	-1.49939	1.21337			0.0338102	-1.44973	1.26255			0.00956795	-0.267545	2.17338			-0.00449227	0.567918	2.46166			-0.0163957	1.52387	2.07441			-0.0470939	1.19614	1.39753			-0.099659	0.920307	1.15758			-0.0401524	0.393467	0.698827
-0.0627892	0.233412	0.553271			0.0834409	-1.38323	1.29953			0.103299	-1.51342	1.19884			0.040011	-1.4633	1.25028			0.038527	-0.284763	2.16281			0.0154489	0.554173	2.45177			-0.0461578	1.5297	2.08351			-0.0198623	1.21299	1.41736			-0.0796765	0.941408	1.17416			-0.0319894	0.40725	0.717434
-0.067232	0.244244	0.568393			0.0808407	-1.39915	1.28472			0.112343	-1.53088	1.18566			0.0340123	-1.47153	1.24163			0.0631525	-0.299522	2.15321			0.0462905	0.536244	2.44427			-0.0476936	1.53693	2.08724			-0.0165013	1.23369	1.4347			-0.0766411	0.956831	1.1884			-0.0150593	0.418363	0.733206
-0.0670064	0.250437	0.583785			0.0892368	-1.4186	1.26848			0.129228	-1.54581	1.17299			0.070247	-1.48555	1.23017			0.0775003	-0.314017	2.143			0.0290232	0.514132	2.43802			-0.0749445	1.54664	2.09952			-0.0111001	1.24847	1.45393			-0.0712204	0.978161	1.20289			-0.0439141	0.427455	0.751634
-0.0689876	0.25814	0.600057			0.0680331	-1.4338	1.25393			0.137023	-1.56282	1.15856			0.0700498	-1.49921	1.21918			0.0640787	-0.32904	2.13183			-0.0112734	0.497826	2.4334			-0.0562254	1.55045	2.10848			-0.00860511	1.25956	1.46875			-0.0649503	0.994658	1.21277			-0.0221552	0.440444	0.769116
-0.070776	0.267988	0.614548			0.0767429	-1.45135	1.24005			0.13978	-1.58154	1.1458			0.0484667	-1.50727	1.20636			0.0776653	-0.344413	2.12269			-0.0150745	0.481519	2.43423			-0.0456314	1.55651	2.12133			-0.013081	1.27841	1.48392			-0.0373442	1.01231	1.22347			-0.0038075	0.456681	0.789161
-0.0686948	0.279279	0.627764			0.054768	-1.47162	1.22511			0.13509	-1.59656	1.13272			0.0570334	-1.52047	1.19723			0.102105	-0.361368	2.11352			0.0111917	0.463419	2.42913			-0.0490972	1.56265	2.12935			-0.0195201	1.29867	1.49809			-0.0322807	1.03057	1.23663			-0.00207003	0.466711	0.808107
-0.059057	0.289367	0.644349			0.0384708	-1.48609	1.21101			0.173621	-1.61058	1.11858			0.0403222	-1.53432	1.18673			0.0717327	-0.372613	2.09884			0.0337069	0.444552	2.42181			-0.0528516	1.56879	2.14395			-0.0191285	1.31722	1.51645			-0.0426037	1.0529	1.25191			-0.00521958	0.479484	0.821472
-0.0555899	0.301512	0.658338			0.0225306	-1.49985	1.19746			0.14689	-1.62569	1.10718			0.0567116	-1.5421	1.17547			0.106892	-0.387372	2.08521			0.0347388	0.43166	2.41359			-0.0458811	1.57811	2.15869			-0.030035	1.33452	1.53306			-0.0372128	1.07108	1.26171			0.0111317	0.494494	0.838811
-0.0537348	0.314489	0.676567			0.022154	-1.51631	1.1839			0.160952	-1.64614	1.09533			0.034136	-1.54933	1.16251			0.15601	-0.400813	2.0779			0.0327706	0.4145	2.41163			-0.0100795	1.58822	2.1665			-0.0233932	1.35551	1.5471			-0.0500285	1.08904	1.27705			-0.00209727	0.511524	0.852958
-0.0525004	0.323593	0.691078			-0.00184555	-1.53278	1.16946			0.19839	-1.66089	1.0832			0.0634199	-1.56119	1.14984			0.192972	-0.414078	2.06685			0.035636	0.394095	2.40616			-0.0122626	1.59544	2.1727			-0.0218811	1.37458	1.56778			-0.0299423	1.10476	1.29761			-0.0109741	0.529493	0.86432
-0.0313723	0.333571	0.70441			-0.00593451	-1.54897	1.15588			0.197527	-1.67283	1.07032			0.0680947	-1.5763	1.13653			0.18059	-0.429891	2.05045			0.0206869	0.379667	2.40411			-0.0150154	1.59886	2.18824			-0.0343936	1.39262	1.58115			-0.0341387	1.12594	1.31065			0.012408	0.545873	0.879608
-0.0214136	0.350312	0.722072			6.51798e-05	-1.5696	1.1417			0.182468	-1.6911	1.0584			0.0599711	-1.58516	1.12404			0.145195	-0.442717	2.04105			0.00934807	0.364299	2.398			-0.000423163	1.60454	2.20019			-0.0435331	1.41731	1.59508			-0.0541303	1.14183	1.32369			-0.0243018	0.564491	0.898713
-0.00300623	0.362785	0.736979			-0.0125411	-1.58589	1.12787			0.218403	-1.70558	1.04611			0.0419879	-1.59602	1.11092			0.15245	-0.454489	2.02693			0.0402655	0.344151	2.39372			-0.00630776	1.6141	2.21037			-0.0712337	1.43867	1.61036			-0.0582228	1.163	1.34001			0.00583582	0.578851	0.918349
0.00923341	0.373552	0.751094			0.0259706	-1.59765	1.11453			0.214898	-1.7177	1.0342			0.0519478	-1.60633	1.09908			0.11448	-0.46793	2.01401			0.0597235	0.327759	2.37989			-0.00886925	1.6235	2.21577			-0.0656574	1.45361	1.6279			-0.0449762	1.18295	1.35698			-0.0125009	0.594006	0.931261
0.0133089	0.385303	0.767234			0.0297207	-1.6171	1.10133			0.260777	-1.73335	1.02234			0.0403186	-1.61592	1.08754			0.0906276	-0.481986	1.99896			0.0575907	0.310854	2.37511			-0.0131235	1.62871	2.22191			-0.0658283	1.46994	1.6441			-0.0444673	1.20037	1.3737			-0.0224185	0.615221	0.95073
0.0228246	0.39863	0.785447			0.0385977	-1.63637	1.089			0.265548	-1.74521	1.01205			0.068985	-1.62325	1.07632			0.132	-0.497711	1.98237			0.0437534	0.292157	2.36523			0.000118658	1.63236	2.22679			-0.0986776	1.48887	1.65498			-0.0503823	1.21679	1.38712			-0.0303039	0.633839	0.973244
0.0291404	0.40979	0.801868			0.0564756	-1.65184	1.07611			0.271264	-1.75715	1.00043			0.0669504	-1.63465	1.06345			0.134546	-0.5108	1.96867			0.0523842	0.27107	2.36238			-0.0097521	1.6343	2.23169			-0.111877	1.50757	1.67331			-0.0520328	1.23597	1.41251			-0.0582919	0.64856	0.998906
0.0203247	0.421563	0.820709			0.0328219	-1.66722	1.06413			0.281078	-1.76665	0.989375			0.0778357	-1.64858	1.05045			0.130988	-0.527228	1.95606			0.0476466	0.254763	2.35269			-0.00344957	1.63811	2.23723			-0.100054	1.52191	1.68774			-0.0611936	1.25654	1.42721			-0.0746002	0.662776	1.02119
0.0236648	0.43791	0.838677			0.0466021	-1.6826	1.0509			0.293782	-1.77913	0.978988			0.064109	-1.65184	1.03849			0.131297	-0.541109	1.94322			0.0605281	0.2382	2.34592			0.0117284	1.64448	2.24032			-0.0849718	1.53973	1.7073			-0.0822245	1.27472	1.44211			-0.0824532	0.680384	1.04099
0.0204639	0.450799	0.854452			0.0358886	-1.69518	1.03811			0.325709	-1.79207	0.967862			0.0648373	-1.65682	1.02678			0.119532	-0.555604	1.93143			0.0540863	0.217796	2.33883			-0.0114189	1.65194	2.2523			-0.0940509	1.55658	1.723			-0.0631789	1.29536	1.45197			-0.0725946	0.696981	1.06155
0.0269212	0.462922	0.868326			0.0286283	-1.70658	1.02605			0.319404	-1.80465	0.958454			0.0538974	-1.66695	1.01553			0.124707	-0.57089	1.92092			0.0440085	0.19833	2.3335			0.00365928	1.65489	2.26051			-0.0733019	1.569	1.74413			-0.0540618	1.3127	1.4691			-0.0930363	0.714228	1.07667
0.0250993	0.476884	0.883906			-0.0115893	-1.72349	1.01406			0.330782	-1.81641	0.947216			0.0409312	-1.675	1.00512			0.123445	-0.585824	1.90986			0.0541663	0.182877	2.32291			-0.0154747	1.65552	2.26453			-0.0598768	1.58548	1.7594			-0.0481358	1.33196	1.48444			-0.0935777	0.735949	1.09319
0.0279131	0.496425	0.89918			-0.0140902	-1.73743	1.00238			0.344645	-1.82708	0.936585			0.0682775	-1.68151	0.994317			0.158712	-0.600583	1.89622			0.0259443	0.163583	2.3136			-0.0110246	1.6601	2.27169			-0.0248525	1.6067	1.77346			-0.00672476	1.35053	1.50401			-0.0564209	0.754278	1.11333
0.0263218	0.511765	0.916767			-0.0211928	-1.74647	0.990206			0.35818	-1.83568	0.925853			0.0955157	-1.68667	0.983984			0.142407	-0.613584	1.88449			0.0108242	0.146251	2.3076			-0.0085531	1.66787	2.28276			-0.0291897	1.6254	1.78761			0.0142642	1.37424	1.52025			-0.0488564	0.771452	1.13228
0.0395978	0.526909	0.93496			-0.00442529	-1.75615	0.978615			0.35873	-1.84708	0.913961			0.0950818	-1.69599	0.974633			0.149997	-0.626147	1.87721			0.00689428	0.131652	2.29717			0.0118616	1.67456	2.29187			-0.0289304	1.64196	1.80182			-0.0033819	1.3912	1.53727			-0.0593695	0.791225	1.15704
0.0438563	0.544021	0.955648			-0.0292527	-1.77099	0.966711			0.340356	-1.86074	0.90326			0.0883217	-1.69726	0.964786			0.165965	-0.640818	1.86417			0.010664	0.116029	2.28651			0.0259211	1.6793	2.29887			-0.00867491	1.66125	1.81592			-0.00692607	1.40815	1.55396			-0.0475805	0.815255	1.17663
0.0361652	0.561878	0.973842			-0.0462821	-1.78293	0.955784			0.305763	-1.87015	0.891744			0.052922	-1.70567	0.95543			0.188033	-0.654522	1.8539			0.0285224	0.0963925	2.28017			0.0303875	1.68357	2.31024			-0.0211623	1.68062	1.82951			-0.00112716	1.42687	1.57126			-0.0444371	0.83979	1.19222
0.0383746	0.577283	0.991329			-0.0393952	-1.79479	0.944304			0.33453	-1.88091	0.880467			0.0679195	-1.71635	0.944947			0.182985	-0.668051	1.84043			0.0597845	0.0792321	2.2781			-0.0112309	1.68598	2.31854			-0.0416961	1.69895	1.84761			0.0157978	1.44506	1.58494			-0.0655981	0.858985	1.2116
0.0380726	0.595862	1.00551			-0.0193129	-1.80799	0.932077			0.35792	-1.88806	0.869808			0.0806459	-1.7234	0.934009			0.176201	-0.680438	1.82823			0.074264	0.0641208	2.27071			0.0185689	1.68971	2.32567			-0.0381902	1.71958	1.86483			-0.00933272	1.46363	1.59784			-0.063401	0.881572	1.23026
0.0351598	0.61641	1.02236			0.00106027	-1.82093	0.920955			0.355925	-1.89584	0.859794			0.0976926	-1.72503	0.923498			0.138835	-0.691683	1.81713			0.0828073	0.0464481	2.26399			0.0248512	1.69601	2.33206			-0.0503739	1.74153	1.88247			-0.0122135	1.48235	1.61392			-0.0793994	0.903509	1.24919
0.0313119	0.632648	1.04002			0.0157754	-1.82871	0.909645			0.362681	-1.90625	0.849484			0.0927532	-1.73028	0.915506			0.123677	-0.705827	1.80703			0.108222	0.0278364	2.26117			0.0282698	1.70168	2.34155			-0.0412713	1.7558	1.89909			0.00150936	1.50261	1.62848			-0.0875007	0.924075	1.27019
0.0336563	0.646544	1.05444			0.0477582	-1.8412	0.897887			0.348504	-1.91475	0.83964			0.100693	-1.73933	0.90634			0.149719	-0.71795	1.79686			0.0635168	0.010676	2.25202			0.0112842	1.70409	2.35296			-0.0180236	1.76859	1.90753			0.00831666	1.51818	1.64378			-0.10012	0.946301	1.2891
0.0376338	0.666195	1.06697			0.0672211	-1.85513	0.887354			0.331569	-1.92072	0.829388			0.100349	-1.74276	0.897764			0.143273	-0.734817	1.78743			0.0823218	-0.00597208	2.24499			-0.00927084	1.70214	2.35952			-0.0122881	1.78544	1.92737			0.0148431	1.53591	1.65873			-0.105255	0.972713	1.303
0.0631705	0.684117	1.08286			0.0401137	-1.86698	0.87717			0.342024	-1.92642	0.819094			0.109275	-1.74774	0.889157			0.136457	-0.751245	1.78135			0.114227	-0.026206	2.23651			-0.000387744	1.70315	2.36417			-0.0172859	1.80518	1.94211			0.017883	1.55563	1.67555			-0.102565	0.991908	1.31481
0.0820212	0.701032	1.09977			0.0294808	-1.8754	0.865686			0.339455	-1.93149	0.808584			0.0957756	-1.75371	0.879607			0.103034	-0.762753	1.76912			0.101508	-0.0428541	2.23046			-0.00395132	1.70354	2.37144			-0.0149665	1.81575	1.95248			-0.00485039	1.57581	1.6892			-0.103419	1.00814	1.33004
0.0807289	0.720246	1.11887			0.01288	-1.88345	0.854875			0.321166	-1.93755	0.798768			0.091169	-1.7576	0.870022			0.0923695	-0.776633	1.75835			0.112117	-0.0594168	2.21686			-0.0185469	1.70673	2.37814			-0.0230225	1.83091	1.96799			-0.0189194	1.59322	1.70788			-0.137027	1.03116	1.34438
0.0779025	0.738868	1.13781			-0.00428656	-1.89213	0.844275			0.321172	-1.94415	0.788891			0.11874	-1.75823	0.862175			0.060619	-0.791128	1.74637			0.139426	-0.0764918	2.21073			-0.0458283	1.70992	2.38174			-0.034953	1.84517	1.97906			-0.0235801	1.61179	1.72531			-0.117375	1.05534	1.36415
0.0761569	0.757841	1.15576			-0.00340347	-1.89847	0.833519			0.296932	-1.95004	0.778946			0.0956259	-1.76122	0.853501			0.0420089	-0.804394	1.73189			0.141695	-0.0964695	2.19893			-0.0576486	1.70992	2.38283			-0.0156321	1.8587	1.99658			-0.0410181	1.62691	1.74201			-0.1085	1.0772	1.39191
0.0725655	0.77572	1.17097			-0.00569721	-1.90905	0.822932			0.278167	-1.95564	0.769203			0.106078	-1.7681	0.844126			0.064117	-0.821085	1.71785			0.111366	-0.112349	2.18896			-0.0541337	1.70821	2.38559			-0.00172476	1.87201	2.01416			-0.0557509	1.64786	1.75859			-0.0879092	1.09885	1.40615
0.0633038	0.79885	1.18839			-0.016842	-1.91937	0.812359			0.263419	-1.95981	0.759767			0.150065	-1.76746	0.836437			0.037141	-0.833121	1.70461			0.111142	-0.127717	2.1782			-0.0691008	1.70906	2.38864			-0.00862028	1.88967	2.0256			-0.0625736	1.66382	1.76815			-0.0995384	1.12072	1.42599
0.0619451	0.821783	1.20552			0.00342333	-1.9228	0.802665			0.255417	-1.96397	0.750496			0.175129	-1.76683	0.8263			0.0284944	-0.847089	1.68926			0.106112	-0.144109	2.17011			-0.0659742	1.7124	2.39456			-0.0261555	1.90631	2.03858			-0.0545773	1.6843	1.78019			-0.0794289	1.14345	1.44375
0.0753949	0.840647	1.22323			0.0288419	-1.92525	0.793261			0.254619	-1.96958	0.741464			0.18359	-1.77289	0.817033			0.00915878	-0.857455	1.67879			0.0819076	-0.159818	2.15946			-0.0482288	1.7173	2.40488			-0.035145	1.92168	2.05204			-0.0460909	1.70187	1.79542			-0.0810015	1.16647	1.46106
0.0712153	0.86032	1.2432			0.0134074	-1.93529	0.783281			0.248579	-1.97392	0.732929			0.183761	-1.77307	0.807957			-0.0219329	-0.870984	1.66736			0.088826	-0.173136	2.15232			-0.0776617	1.71629	2.41138			-0.0462941	1.93602	2.05997			-0.0224519	1.71829	1.80702			-0.0853261	1.19468	1.47792
0.0576001	0.884829	1.26306			0.0249577	-1.94289	0.773283			0.264544	-1.98061	0.723648			0.172887	-1.77551	0.799138			-0.0074279	-0.885567	1.65661			0.11198	-0.189358	2.14624			-0.0888213	1.71582	2.41459			-0.0581879	1.95303	2.071			-0.041148	1.73479	1.81646			-0.0730915	1.22247	1.49386
0.0457788	0.905071	1.27652			0.00254497	-1.94795	0.764221			0.26533	-1.98405	0.714947			0.160605	-1.78022	0.79153			-0.0110973	-0.896197	1.64864			0.105919	-0.206689	2.13414			-0.0894956	1.71559	2.42275			-0.079082	1.96995	2.08133			-0.0341381	1.75044	1.82767			-0.0780685	1.24426	1.51561
0.0413881	0.925312	1.29083			0.0365452	-1.9561	0.755062			0.239777	-1.9836	0.707972			0.151564	-1.78474	0.78239			-0.0259674	-0.908583	1.63673			0.0868178	-0.222227	2.12733			-0.0896973	1.71652	2.43037			-0.0666576	1.98636	2.09353			-0.00953438	1.7697	1.84155			-0.0599501	1.26858	1.53841
0.0476041	0.94864	1.30736			0.0482715	-1.9618	0.745772			0.222417	-1.98767	0.699539			0.150434	-1.78275	0.77367			-0.024533	-0.916753	1.62552			0.0769164	-0.234521	2.11707			-0.0745754	1.72002	2.43107			-0.0699076	2.00351	2.10215			0.000422422	1.78528	1.86442			-0.0586237	1.29456	1.55844
0.0289034	0.970282	1.32637			0.052594	-1.96514	0.736736			0.202107	-1.99075	0.691067			0.169316	-1.7804	0.766399			-0.0347378	-0.930194	1.61546			0.0897257	-0.251425	2.10817			-0.0868346	1.72111	2.43858			-0.0806879	2.01564	2.11172			0.0109106	1.80154	1.88582			-0.0578066	1.32068	1.5723
0.0311283	0.987154	1.34161			0.034934	-1.97039	0.727846			0.197569	-1.99328	0.68296			0.180706	-1.78673	0.758786			-0.0491644	-0.943635	1.60638			0.0953809	-0.271147	2.09781			-0.0697584	1.71745	2.44332			-0.0969493	2.02406	2.13108			0.0215956	1.81505	1.89343			-0.0500402	1.34355	1.58932
0.0249213	1.00805	1.35956			-0.000806269	-1.97926	0.719344			0.195636	-1.9893	0.67414			0.179831	-1.78927	0.74865			-0.0703095	-0.956198	1.59876			0.0819485	-0.284892	2.08364			-0.069343	1.71318	2.44845			-0.108151	2.03663	2.14325			0.00418592	1.83354	1.90886			-0.0503152	1.36693	1.60469
0.0215928	1.03212	1.37408			-0.00707016	-1.9855	0.71098			0.201757	-1.99093	0.665164			0.165533	-1.78909	0.739555			-0.0480807	-0.969551	1.59341			0.0593562	-0.299833	2.07448			-0.0692644	1.7096	2.45339			-0.0985197	2.0509	2.14686			-0.00796524	1.84912	1.92801			-0.0274297	1.39255	1.6169
0.0141595	1.05313	1.38472			-0.0232168	-1.98758	0.701928			0.181086	-1.99011	0.656204			0.113422	-1.78999	0.730061			-0.0241038	-0.981499	1.58517			0.0978132	-0.318103	2.06457			-0.0574473	1.70867	2.45619			-0.115506	2.06176	2.1511			0.00400219	1.86592	1.94058			0.00582606	1.41095	1.63231
0.0197426	1.07267	1.39995			-0.0331403	-1.99002	0.692896			0.164069	-1.99111	0.647973			0.139096	-1.79126	0.720112			-0.0459351	-0.992392	1.57774			0.0715265	-0.333897	2.05687			-0.0705824	1.70852	2.46377			-0.0702641	2.07086	2.17173			-0.0193447	1.88188	1.95262			0.00448772	1.43166	1.6489
0.0303923	1.09386	1.41394			-0.0291963	-1.99247	0.684234			0.16842	-1.99256	0.639786			0.128855	-1.78655	0.710727			-0.0456772	-1.00504	1.56581			0.0361668	-0.347557	2.04476			-0.0505909	1.70502	2.46424			-0.0676019	2.07973	2.18389			-0.03546	1.89592	1.95676			-0.0210379	1.45988	1.66218
0.0386686	1.1171	1.43035			-0.0218266	-1.99446	0.67579			0.171945	-1.99238	0.631715			0.151866	-1.7861	0.700686			-0.0421987	-1.02086	1.55182			0.0481707	-0.362754	2.03631			-0.0429189	1.69966	2.47231			-0.0642158	2.09133	2.19152			-0.00789298	1.91065	1.96999			-0.00941718	1.48369	1.68212
0.0318636	1.13758	1.44679			-0.0123094	-1.99627	0.667572			0.1806	-1.9903	0.624213			0.130116	-1.78936	0.691426			-0.0592317	-1.03184	1.53769			0.046473	-0.379914	2.02918			-0.044495	1.69531	2.47443			-0.0743729	2.09954	2.19742			-0.0119049	1.92654	1.98502			0.010312	1.50303	1.70083
0.0349482	1.16161	1.46438			-0.0129481	-2.00124	0.658816			0.181657	-1.9883	0.616115			0.16616	-1.787	0.682226			-0.0531854	-1.0415	1.52749			0.0139018	-0.392891	2.01603			-0.047975	1.69336	2.48336			-0.0792304	2.11159	2.2055			-0.0257552	1.94426	1.99877			0.0275788	1.52872	1.72256
0.0296463	1.18767	1.48104			-0.024775	-1.99726	0.650377			0.156448	-1.98713	0.608386			0.181141	-1.78058	0.673688			-0.0274206	-1.05283	1.51403			-0.00471196	-0.404502	2.00831			-0.059835	1.69336	2.48882			-0.0775925	2.12586	2.22796			-0.00374404	1.95684	2.00974			0.0252929	1.55311	1.73949
0.0163979	1.20896	1.49432			0.0179036	-1.99581	0.642076			0.16406	-1.9884	0.601284			0.17447	-1.78103	0.665142			-0.0037003	-1.06302	1.50111			-0.0220016	-0.419358	1.99481			-0.0506554	1.69297	2.49519			-0.0583729	2.13761	2.23499			-0.0237204	1.97066	2.02148			0.06978	1.57534	1.75306
0.021449	1.22905	1.50584			0.0309427	-1.99844	0.633696			0.180225	-1.98695	0.59363			0.155219	-1.78194	0.656723			-0.00194266	-1.07374	1.48994			-0.0332473	-0.433445	1.98234			-0.0527986	1.68777	2.49641			-0.0489185	2.14604	2.25561			-0.0268153	1.9847	2.02864			0.103553	1.60298	1.76793
0.0268481	1.25347	1.51948			0.0699951	-2.00115	0.625499			0.211632	-1.98414	0.586007			0.173193	-1.77823	0.648198			-0.0238244	-1.08692	1.47792			-0.0180493	-0.445312	1.97267			-0.0419156	1.68264	2.49472			-0.0487928	2.15816	2.26596			-0.0109465	1.99613	2.03143			0.0692213	1.62975	1.78259
0.0156516	1.2782	1.53284			0.0741249	-2.00269	0.61718			0.249212	-1.98342	0.578795			0.174805	-1.77886	0.64068			-0.0155189	-1.09641	1.46697			9.28571e-05	-0.458886	1.96693			-0.0673148	1.67937	2.48978			-0.0586367	2.17317	2.27538			0.000861462	2.00902	2.04101			0.0582883	1.65284	1.79354
0.0204504	1.29951	1.54854			0.0649227	-2.00115	0.60916			0.243934	-1.97908	0.572058			0.165665	-1.7804	0.633846			-0.0491532	-1.10299	1.45522			-0.0223569	-0.47673	1.95725			-0.054328	1.67735	2.49396			-0.0681691	2.1827	2.28169			-0.0201543	2.02675	2.05317			0.0565447	1.67413	1.81091
0.0183354	1.32067	1.56441			0.0474956	-2.00233	0.602112			0.221118	-1.97618	0.565489			0.13108	-1.77823	0.627856			-0.0417325	-1.11257	1.44611			-0.0341811	-0.485865	1.95224			-0.0422321	1.67316	2.49331			-0.061369	2.19046	2.28862			-0.0354084	2.03764	2.06035			0.0494028	1.69931	1.82349
0.0259396	1.3431	1.58035			0.0935235	-2.0016	0.594861			0.242751	-1.97365	0.558864			0.125417	-1.77307	0.620498			-0.0715172	-1.12425	1.43663			-0.0540192	-0.498927	1.94488			-0.0499187	1.67013	2.50341			-0.0314365	2.19823	2.30027			-0.0382927	2.04731	2.07404			0.0826897	1.72601	1.83175
0.039706	1.36221	1.59779			0.148631	-2.00124	0.587792			0.272841	-1.96949	0.551636			0.113338	-1.77235	0.613594			-0.0369025	-1.13585	1.42314			-0.0312768	-0.516258	1.93444			-0.0421225	1.66243	2.51348			-0.0426317	2.20577	2.31011			0.00240664	2.05859	2.08315			0.0704192	1.74752	1.84055
0.0346438	1.38271	1.61146			0.166918	-2.00323	0.581645			0.286187	-1.96352	0.545168			0.133685	-1.77407	0.606926			-0.0703461	-1.14525	1.41179			-0.00116627	-0.529833	1.92669			-0.0561775	1.65412	2.51791			-0.0514164	2.21079	2.31657			0.004226	2.07194	2.09621			0.0853998	1.76642	1.85286
0.0302794	1.40495	1.62273			0.159034	-2.00251	0.574947			0.312804	-1.95827	0.538998			0.133163	-1.77063	0.599533			-0.082156	-1.15623	1.39951			-0.00516577	-0.541358	1.91358			-0.051885	1.64883	2.52186			-0.0725839	2.21597	2.32063			0.0165659	2.08184	2.1087			0.0843663	1.79053	1.86982
0.0331783	1.42893	1.63724			0.177192	-2.00088	0.569007			0.284422	-1.9551	0.533056			0.137049	-1.76547	0.592941			-0.10664	-1.16572	1.3896			0.0218515	-0.556982	1.90394			-0.00785074	1.6451	2.52324			-0.0595462	2.22417	2.32968			0.0157209	2.09665	2.11705			0.109643	1.80849	1.87986
0.0329782	1.4467	1.65135			0.191649	-1.99581	0.563124			0.32102	-1.94877	0.527341			0.139033	-1.76185	0.586032			-0.111401	-1.17547	1.37699			0.00386767	-0.572008	1.90006			-0.00415869	1.63858	2.52587			-0.0715278	2.22728	2.33737			0.0151483	2.10792	2.12928			0.112374	1.82711	1.89819
0.0443787	1.4672	1.66592			0.179984	-1.99183	0.556592			0.309369	-1.94569	0.521593			0.145549	-1.75968	0.579273			-0.115204	-1.18505	1.36532			-0.00420193	-0.582338	1.88986			-0.0117213	1.63003	2.53496			-0.0949691	2.22979	2.3476			0.038878	2.11775	2.14016			0.118519	1.85121	1.91093
0.0601385	1.49031	1.68043			0.222667	-1.99274	0.550648			0.306355	-1.94171	0.516431			0.143567	-1.75471	0.572139			-0.101189	-1.19857	1.35543			-0.0224451	-0.595742	1.88142			-0.00380246	1.62031	2.53297			-0.1067	2.23504	2.35882			-0.0173829	2.12519	2.14639			0.140538	1.87438	1.92289
0.0565593	1.51211	1.69028			0.208299	-1.98794	0.54422			0.294732	-1.93429	0.510218			0.134969	-1.75235	0.565118			-0.108717	-1.20736	1.3447			-0.0608637	-0.612305	1.8723			-0.00181869	1.61425	2.54005			-0.0686966	2.2408	2.36678			-0.0134842	2.13731	2.16158			0.1334	1.89148	1.93394
0.0540331	1.53307	1.70541			0.191253	-1.98306	0.537699			0.314061	-1.92687	0.503872			0.0989126	-1.75073	0.558779			-0.108205	-1.21448	1.33407			-0.0562522	-0.623318	1.86196			-0.000191192	1.60772	2.53993			-0.0573474	2.24502	2.37771			-0.006818	2.15243	2.16744			0.114772	1.90981	1.94184
0.051202	1.55585	1.71856			0.208779	-1.97862	0.531461			0.342956	-1.92561	0.497262			0.0658519	-1.7415	0.552445			-0.11572	-1.2244	1.31986			-0.0681654	-0.632283	1.84828			-0.00216542	1.60236	2.54292			-0.0552874	2.25145	2.39021			-0.00979545	2.15857	2.18082			0.100749	1.93362	1.95823
0.0488357	1.57809	1.73174			0.200375	-1.97093	0.524509			0.358288	-1.92063	0.490356			0.0816155	-1.73462	0.546171			-0.13334	-1.23108	1.30873			-0.0708955	-0.645601	1.83902			0.00510405	1.59879	2.54334			-0.0204463	2.25825	2.40371			-0.0186951	2.16655	2.19475			0.0802474	1.9539	1.9835
0.0327531	1.59739	1.74312			0.184585	-1.9675	0.517688			0.368257	-1.91466	0.483784			0.102897	-1.73462	0.540377			-0.116026	-1.24224	1.29857			-0.078765	-0.658237	1.82812			0.0045895	1.59008	2.55079			-0.0185292	2.26143	2.41158			-0.0273533	2.17376	2.20466			0.0731808	1.97793	2.00403
0.0337909	1.61697	1.75491			0.186828	-1.96542	0.511048			0.369763	-1.90851	0.47725			0.115884	-1.73236	0.535383			-0.12382	-1.24742	1.28992			-0.0568081	-0.668226	1.81685			0.0217237	1.58216	2.55095			-0.0127874	2.26468	2.4186			0.00980497	2.18389	2.21857			0.101984	1.99929	2.01558
0.0410725	1.64177	1.76665			0.204255	-1.96324	0.503763			0.378199	-1.9029	0.471477			0.135813	-1.72983	0.530053			-0.0848064	-1.25708	1.27958			-0.0349055	-0.677361	1.80797			0.0167579	1.57431	2.54958			-0.00781087	2.2757	2.42616			0.0308506	2.18887	2.22663			0.114787	2.01935	2.02293
0.0376181	1.6608	1.77788			0.221851	-1.95818	0.497287			0.370239	-1.8953	0.465392			0.135728	-1.72494	0.52515			-0.0908885	-1.262	1.27134			-0.0427849	-0.692131	1.80162			0.0485315	1.56964	2.54824			-0.016145	2.27821	2.43512			0.0200053	2.20123	2.23492			0.12589	2.03609	2.03429
0.0509593	1.67886	1.7941			0.245328	-1.94913	0.490858			0.392104	-1.89041	0.459055			0.15819	-1.72177	0.519968			-0.116314	-1.26736	1.26046			-0.0381068	-0.703315	1.79232			0.0536457	1.56405	2.55425			-0.0174358	2.27976	2.44105			0.026583	2.20637	2.24009			0.134701	2.05493	2.04124
0.0627713	1.69759	1.8041			0.236316	-1.94732	0.48437			0.381809	-1.88345	0.453406			0.169718	-1.71553	0.514327			-0.126953	-1.27615	1.24973			-0.0573132	-0.712877	1.78246			0.0623442	1.55099	2.55563			0.0125819	2.27939	2.45083			0.0104209	2.20936	2.24928			0.129483	2.07672	2.04949
0.0619796	1.71606	1.8139			0.244016	-1.94515	0.477978			0.385386	-1.87512	0.447382			0.184886	-1.71056	0.508874			-0.116542	-1.28493	1.23861			-0.0809444	-0.726622	1.76937			0.0643022	1.54174	2.556			0.00765363	2.28279	2.45367			0.0204574	2.21688	2.25118			0.143606	2.09274	2.05423
0.0575744	1.73365	1.82717			0.223747	-1.93737	0.471379			0.392393	-1.86599	0.441456			0.169521	-1.70857	0.504165			-0.130777	-1.29363	1.22856			-0.0691614	-0.739941	1.75798			0.0555575	1.53164	2.55817			0.0167294	2.27984	2.46194			0.0452997	2.22386	2.26521			0.129778	2.10883	2.06615
0.068165	1.75151	1.84165			0.243649	-1.93493	0.465315			0.390433	-1.85703	0.435157			0.173495	-1.70775	0.498969			-0.114544	-1.30048	1.21798			-0.0637913	-0.749247	1.74724			0.0727884	1.52045	2.56923			0.00241233	2.27762	2.46941			0.0478305	2.22969	2.27067			0.13891	2.12363	2.07158
0.0608629	1.77228	1.8556			0.234966	-1.9276	0.459224			0.4095	-1.85187	0.430394			0.173328	-1.69581	0.493724			-0.116433	-1.30514	1.20844			-0.0356084	-0.760601	1.73535			0.0852948	1.51105	2.5681			0.00385619	2.28057	2.48209			0.0340894	2.23545	2.28056			0.132531	2.13849	2.08658
0.0474884	1.78948	1.86898			0.212878	-1.91909	0.452815			0.373199	-1.84337	0.425136			0.181966	-1.69165	0.488304			-0.123772	-1.31541	1.19672			-0.0259916	-0.775286	1.72284			0.0816618	1.50304	2.57334			0.00862596	2.2791	2.48992			0.0308657	2.24189	2.28674			0.127155	2.15292	2.09931
0.0396026	1.80409	1.88082			0.212608	-1.91249	0.446841			0.358583	-1.83649	0.420116			0.186172	-1.68712	0.482511			-0.101104	-1.32227	1.18697			-0.00469041	-0.782884	1.71496			0.114818	1.48929	2.57498			0.0292981	2.27326	2.50423			0.00633386	2.24527	2.29608			0.106203	2.16894	2.11096
0.0409476	1.82364	1.89185			0.215661	-1.90525	0.440725			0.333261	-1.82871	0.41536			0.167624	-1.68025	0.476108			-0.105034	-1.33105	1.17901			-0.000266868	-0.794837	1.70267			0.130052	1.47911	2.57233			-0.00750881	2.27096	2.50479			0.0221183	2.24826	2.30099			0.114211	2.18742	2.12477
0.0436019	1.84429	1.90596			0.203697	-1.90154	0.4345			0.341687	-1.81903	0.410084			0.162125	-1.67527	0.469586			-0.0907716	-1.33931	1.17362			-0.00588047	-0.805679	1.69414			0.130771	1.46559	2.57159			0.0139946	2.27518	2.50966			0.00509493	2.25333	2.3131			0.128155	2.19954	2.13776
0.034065	1.86141	1.91856			0.205548	-1.88951	0.428442			0.328698	-1.81062	0.404993			0.14434	-1.67002	0.464303			-0.0739869	-1.34133	1.16445			-0.0142662	-0.818144	1.68548			0.110523	1.46015	2.57543			-0.00483081	2.27126	2.51865			0.0311759	2.261	2.32488			0.141001	2.21188	2.15235
0.0438644	1.87756	1.92762			0.197416	-1.87947	0.422601			0.339112	-1.8032	0.399646			0.181134	-1.6636	0.458343			-0.081328	-1.34897	1.15387			0.00943954	-0.824718	1.67564			0.144912	1.45199	2.5719			-0.0239903	2.26934	2.5307			0.0375493	2.26069	2.34204			0.12154	2.22797	2.16104
0.0297484	1.89596	1.94088			0.176722	-1.87422	0.417223			0.334802	-1.7984	0.394512			0.183807	-1.65473	0.45282			-0.0706587	-1.35284	1.14232			0.00181083	-0.832487	1.665			0.143058	1.4401	2.56782			-0.0266347	2.27082	2.53497			0.0484929	2.26338	2.35111			0.109649	2.2463	2.18096
0.0452044	1.91307	1.95647			0.138371	-1.86562	0.411743			0.338268	-1.79071	0.388808			0.176948	-1.64876	0.446635			-0.0590722	-1.35881	1.13233			0.00513359	-0.843842	1.65288			0.122923	1.42836	2.57083			-0.0139785	2.26889	2.53551			0.044239	2.26568	2.36156			0.0808465	2.26117	2.19398
0.0524002	1.92725	1.96746			0.122348	-1.85956	0.406886			0.338525	-1.78121	0.38417			0.184382	-1.6494	0.440507			-0.0473297	-1.36654	1.1193			0.0109653	-0.851867	1.64232			0.12698	1.416	2.57168			-0.0203434	2.26512	2.54953			0.0402998	2.26675	2.37299			0.088923	2.2751	2.20478
0.0452939	1.94579	1.97533			0.107064	-1.8535	0.403388			0.320942	-1.77262	0.379683			0.217977	-1.64261	0.435087			-0.0334838	-1.36874	1.10965			0.0383652	-0.862112	1.62851			0.107508	1.40691	2.56784			-0.0471332	2.26786	2.54888			0.048197	2.2699	2.3834			0.0776836	2.28909	2.22378
0.0502475	1.96318	1.98792			0.084172	-1.84681	0.399637			0.327746	-1.76348	0.375246			0.217489	-1.63293	0.430772			-0.038779	-1.37243	1.09973			0.0378821	-0.871333	1.61743			0.119849	1.3979	2.56518			-0.0292384	2.26764	2.55905			0.0424406	2.27205	2.39537			0.0585777	2.30252	2.23736
0.0382187	1.97496	1.99916			0.0678955	-1.83441	0.395692			0.321261	-1.75688	0.370254			0.238627	-1.6285	0.425566			-0.0505312	-1.37498	1.08972			0.0416311	-0.881578	1.6045			0.131572	1.38803	2.56265			-0.00910537	2.25965	2.56518			0.0506385	2.2709	2.40378			0.0532584	2.31211	2.26026
0.0455199	1.98796	2.01022			0.0804679	-1.82826	0.391981			0.317251	-1.74647	0.365985			0.212093	-1.62253	0.420452			-0.0598131	-1.38271	1.07996			0.0491226	-0.890884	1.59276			0.117746	1.3721	2.56574			0.00213436	2.25093	2.57376			0.0862385	2.26982	2.40731			0.0654342	2.32561	2.26752
0.0480055	2.00166	2.02025			0.0833867	-1.82609	0.388143			0.294064	-1.73571	0.361332			0.199941	-1.61628	0.416834			-0.052635	-1.38842	1.06975			0.0844278	-0.902751	1.58205			0.107542	1.35671	2.55871			0.00963837	2.24916	2.58366			0.0905527	2.26975	2.41372			0.0744412	2.3355	2.2814
0.0624876	2.01581	2.02999			0.0528354	-1.8165	0.384241			0.280045	-1.72521	0.357167			0.164622	-1.61185	0.412529			-0.0473455	-1.39395	1.05835			0.0874529	-0.912825	1.57286			0.128239	1.34459	2.55989			0.012065	2.24324	2.58962			0.0952063	2.26921	2.42322			0.0851838	2.34581	2.29083
0.0614938	2.02824	2.04179			0.0395736	-1.80655	0.380035			0.292453	-1.71282	0.353135			0.158079	-1.60796	0.408322			-0.0443709	-1.39861	1.05011			0.0667596	-0.925546	1.56254			0.123078	1.33207	2.56084			0.0111178	2.23363	2.59306			0.118007	2.27174	2.42913			0.0957314	2.35072	2.29035
0.0714942	2.04089	2.05063			0.0319588	-1.7984	0.375969			0.2949	-1.70784	0.349101			0.145363	-1.59801	0.404762			-0.0367098	-1.40318	1.04234			0.0557957	-0.932461	1.5536			0.154459	1.31824	2.55775			-0.000290462	2.22839	2.60181			0.130178	2.27013	2.43126			0.107318	2.35938	2.30253
0.0694734	2.05382	2.06012			0.0643583	-1.78773	0.372588			0.310289	-1.69934	0.345147			0.143769	-1.58815	0.40056			-0.034992	-1.40985	1.03366			0.0403777	-0.943645	1.53875			0.179216	1.30713	2.55562			0.0236469	2.22048	2.60367			0.143769	2.26714	2.4374			0.0997305	2.36912	2.31641
0.0638172	2.06442	2.07377			0.0741176	-1.77615	0.369694			0.330429	-1.68884	0.340789			0.14621	-1.58371	0.396342			-0.0715334	-1.41539	1.02404			0.0348419	-0.954232	1.52766			0.198426	1.29058	2.55401			0.0195906	2.21005	2.60822			0.131586	2.26484	2.43725			0.0942077	2.37627	2.32549
0.0620226	2.07667	2.08761			0.0592015	-1.76855	0.366667			0.362827	-1.67654	0.338294			0.163369	-1.58091	0.392007			-0.0560372	-1.41732	1.01384			0.0279905	-0.962684	1.51357			0.192194	1.27418	2.5535			0.0294644	2.20303	2.61701			0.106786	2.26276	2.44183			0.128786	2.38493	2.33185
0.0768349	2.09302	2.10028			0.0747388	-1.76176	0.363705			0.370191	-1.66858	0.334999			0.168038	-1.56951	0.387781			-0.0571535	-1.42382	1.00455			0.0285836	-0.972331	1.50426			0.180666	1.26291	2.55969			0.0426854	2.19985	2.63184			0.0890378	2.26284	2.45362			0.152587	2.39092	2.33872
0.0756443	2.10497	2.11319			0.0893109	-1.74747	0.360197			0.366731	-1.66098	0.330346			0.173266	-1.55992	0.383772			-0.0818732	-1.42646	0.996488			0.0398075	-0.982149	1.4924			0.193955	1.25226	2.55724			0.0505059	2.19283	2.63891			0.108575	2.26284	2.46212			0.180712	2.39784	2.34565
0.0684361	2.1156	2.12231			0.0704999	-1.73688	0.356849			0.377367	-1.65121	0.325925			0.16623	-1.55621	0.379798			-0.0948895	-1.42742	0.989272			0.0464471	-0.988211	1.48406			0.181411	1.24076	2.55759			0.0589862	2.18233	2.65084			0.0987946	2.25831	2.46897			0.184469	2.40419	2.35233
0.0693108	2.12656	2.13431			0.101726	-1.72766	0.353796			0.388875	-1.64315	0.322203			0.124921	-1.5459	0.375821			-0.0808278	-1.43111	0.979874			0.0734791	-0.996578	1.473			0.189053	1.22584	2.55542			0.0713989	2.17834	2.65797			0.121943	2.25394	2.47005			0.156214	2.41697	2.35393
0.0766367	2.13928	2.14651			0.131096	-1.71879	0.349785			0.387808	-1.63565	0.318747			0.113466	-1.53884	0.371761			-0.0847849	-1.43577	0.969832			0.0865497	-1.00418	1.46129			0.161846	1.21177	2.55636			0.0550148	2.17183	2.66582			0.0972625	2.24842	2.48256			0.145679	2.42729	2.362
0.0801177	2.1488	2.15915			0.12497	-1.71182	0.346771			0.365367	-1.62524	0.314841			0.124005	-1.53604	0.368251			-0.0910922	-1.43823	0.961785			0.0968348	-1.01562	1.44941			0.148176	1.19763	2.5534			0.0642593	2.16304	2.67601			0.0862471	2.24443	2.4838			0.13743	2.42873	2.37194
0.0826589	2.15878	2.1692			0.129343	-1.70232	0.343837			0.380421	-1.61321	0.310334			0.109782	-1.53052	0.365231			-0.0611077	-1.43761	0.952608			0.0940225	-1.02287	1.43774			0.157358	1.18388	2.55029			0.0837356	2.15742	2.67917			0.0716359	2.24197	2.48801			0.151517	2.43674	2.38512
0.0944134	2.16939	2.17932			0.129647	-1.69337	0.340718			0.39328	-1.60543	0.306646			0.116892	-1.51876	0.36218			-0.0938008	-1.43946	0.942757			0.0933581	-1.03039	1.4255			0.200849	1.17331	2.5494			0.100005	2.15084	2.69289			0.0494135	2.23729	2.49137			0.19345	2.44338	2.40181
0.0831994	2.17641	2.19103			0.140603	-1.68115	0.336831			0.368145	-1.59665	0.303369			0.115652	-1.50971	0.357816			-0.0965471	-1.44324	0.932665			0.103923	-1.03995	1.41268			0.206989	1.1594	2.54547			0.0779028	2.14057	2.69673			0.045148	2.23138	2.49413			0.185285	2.44468	2.41265
0.0912118	2.18186	2.2043			0.130961	-1.67265	0.332774			0.356603	-1.58444	0.300426			0.115509	-1.50708	0.35421			-0.0980598	-1.44526	0.923838			0.126233	-1.0513	1.40168			0.185197	1.14075	2.53761			0.0699549	2.12615	2.69919			0.0457816	2.22448	2.49719			0.186583	2.44843	2.43441
0.0866677	2.18946	2.21471			0.131786	-1.66677	0.328555			0.348216	-1.57259	0.296916			0.107414	-1.50066	0.349991			-0.126545	-1.45053	0.914936			0.104257	-1.05796	1.38814			0.186756	1.12248	2.53938			0.0823575	2.11617	2.70151			0.0294466	2.21788	2.50244			0.159904	2.45319	2.44625
0.0909765	2.20029	2.22652			0.121481	-1.65691	0.323934			0.343716	-1.56272	0.292438			0.0934742	-1.49198	0.346343			-0.148228	-1.45527	0.907101			0.128531	-1.06735	1.37739			0.17072	1.10608	2.53848			0.0851427	2.10848	2.70137			0.0311265	2.21143	2.50704			0.17482	2.455	2.4598
0.0745384	2.20499	2.23669			0.133929	-1.6456	0.319129			0.352013	-1.55169	0.288541			0.094996	-1.4851	0.342675			-0.149849	-1.45431	0.900865			0.124377	-1.07982	1.36539			0.182873	1.09404	2.53283			0.102908	2.09481	2.70588			0.0201468	2.20775	2.51959			0.189859	2.45117	2.466
0.0823597	2.21084	2.24735			0.119891	-1.6332	0.3142			0.327313	-1.54192	0.284825			0.0928698	-1.47759	0.33876			-0.180165	-1.45597	0.893155			0.111386	-1.08733	1.35301			0.185124	1.07477	2.52794			0.0935775	2.08121	2.70925			0.0328782	2.20038	2.52279			0.203663	2.45334	2.47332
0.0880107	2.21793	2.25675			0.113054	-1.62361	0.30962			0.370251	-1.53269	0.280998			0.0831259	-1.46764	0.334728			-0.176065	-1.45984	0.887767			0.110142	-1.09305	1.34188			0.171032	1.05938	2.53071			0.0993147	2.0676	2.71797			0.0360872	2.19041	2.53298			0.200237	2.45615	2.47832
0.100595	2.22322	2.26372			0.115105	-1.61267	0.305206			0.345248	-1.52156	0.27662			0.113654	-1.45986	0.330705			-0.187087	-1.46335	0.881266			0.132521	-1.10509	1.32936			0.184706	1.04119	2.52646			0.111668	2.05541	2.73197			0.0414828	2.18304	2.54114			0.177823	2.45427	2.47961
0.0935439	2.22944	2.27562			0.102305	-1.6028	0.300925			0.34148	-1.51034	0.272791			0.135078	-1.45633	0.326183			-0.184176	-1.46362	0.873126			0.122853	-1.11474	1.31734			0.177317	1.02379	2.52409			0.118632	2.0441	2.7419			0.0509368	2.17967	2.56085			0.153223	2.45456	2.47732
0.104248	2.23696	2.28453			0.103949	-1.59339	0.296849			0.320463	-1.50166	0.26896			0.124887	-1.44629	0.321696			-0.183175	-1.46274	0.865728			0.120009	-1.12097	1.30626			0.144088	1.01034	2.51537			0.105131	2.03294	2.74859			0.0674114	2.17153	2.57449			0.185036	2.45435	2.49116
0.111196	2.24493	2.29349			0.0983914	-1.57892	0.292711			0.30905	-1.49252	0.265349			0.135902	-1.43181	0.318086			-0.166217	-1.46625	0.856682			0.147876	-1.13002	1.29509			0.148081	0.997986	2.51238			0.0989897	2.02451	2.75343			0.0571598	2.16378	2.57725			0.182826	2.45485	2.49561
0.103173	2.24812	2.30026			0.0986166	-1.56634	0.288869			0.29886	-1.48329	0.261779			0.129948	-1.42656	0.31412			-0.143847	-1.46555	0.847189			0.135175	-1.13753	1.2849			0.146586	0.983298	2.51128			0.0971519	2.0115	2.75038			0.0543044	2.15343	2.58233			0.15607	2.45442	2.499
0.0833893	2.25064	2.31			0.0859443	-1.5573	0.284849			0.334276	-1.47243	0.25817			0.133256	-1.41887	0.310771			-0.121454	-1.46696	0.838404			0.136404	-1.14428	1.2725			0.133172	0.965891	2.51636			0.115147	1.99937	2.75526			0.0360298	2.14276	2.58252			0.154528	2.45687	2.50296
0.0677178	2.25802	2.31783			0.0716535	-1.54852	0.281527			0.335817	-1.4652	0.254647			0.123319	-1.41019	0.306971			-0.103989	-1.46889	0.82952			0.131206	-1.15068	1.25948			0.113689	0.948716	2.50652			0.126042	1.99021	2.75143			0.0343537	2.13225	2.58878			0.125969	2.46185	2.50627
0.0744098	2.26311	2.3241			0.0859551	-1.54002	0.278019			0.353941	-1.45497	0.25125			0.124856	-1.40503	0.303097			-0.0808168	-1.46942	0.820904			0.138022	-1.16007	1.24759			0.11176	0.933795	2.50223			0.120083	1.98075	2.75646			0.0308647	2.12419	2.59147			0.127757	2.45601	2.51464
0.0826622	2.26524	2.33361			0.104017	-1.52835	0.274747			0.367052	-1.44357	0.24804			0.129617	-1.39942	0.299101			-0.0416629	-1.46573	0.812071			0.141693	-1.1698	1.23763			0.126568	0.918874	2.49788			0.13609	1.9684	2.75567			0.03495	2.11606	2.58908			0.112094	2.45146	2.52356
0.088683	2.2683	2.34162			0.105639	-1.51731	0.271135			0.382395	-1.43525	0.245061			0.137639	-1.38802	0.29479			-0.0368845	-1.46344	0.803105			0.13876	-1.17416	1.22491			0.0937695	0.902943	2.49863			0.139722	1.95362	2.75865			0.0316501	2.10524	2.58804			0.133208	2.45247	2.5305
0.085571	2.26972	2.3501			0.118669	-1.50772	0.267987			0.38967	-1.42629	0.241976			0.155985	-1.37789	0.29099			-0.0569077	-1.46827	0.794824			0.137249	-1.18381	1.21349			0.0928166	0.887167	2.49867			0.149365	1.94112	2.76032			0.0329097	2.09127	2.5994			0.130719	2.45132	2.53878
0.103135	2.2694	2.35894			0.116944	-1.49713	0.264799			0.398863	-1.41544	0.23907			0.164761	-1.37246	0.286753			-0.0837297	-1.4688	0.786763			0.131894	-1.19533	1.20171			0.0949266	0.867894	2.49758			0.133842	1.92545	2.7651			0.01274	2.07961	2.60738			0.144888	2.44525	2.54975
0.126028	2.26896	2.36508			0.138713	-1.48935	0.261793			0.396591	-1.40177	0.236491			0.177829	-1.3683	0.282304			-0.101746	-1.46722	0.778833			0.131852	-1.20173	1.19239			0.1055	0.848777	2.49745			0.150056	1.90875	2.7696			-0.000630646	2.07002	2.6116			0.109489	2.44237	2.56027
0.126448	2.27252	2.36948			0.180365	-1.47913	0.258796			0.398286	-1.39282	0.234136			0.172048	-1.35708	0.278063			-0.0807766	-1.47223	0.770263			0.116072	-1.2107	1.18179			0.0975039	0.831291	2.49911			0.111308	1.89758	2.77438			-0.00898937	2.05813	2.61236			0.115916	2.43472	2.56804
0.121523	2.27347	2.37756			0.194706	-1.46737	0.255629			0.392624	-1.38223	0.232055			0.1641	-1.34713	0.274113			-0.0899077	-1.46889	0.764832			0.137139	-1.21949	1.17337			0.119984	0.816759	2.50334			0.0931031	1.88088	2.78486			-0.00591522	2.04915	2.61559			0.117645	2.42729	2.57797
0.117405	2.2713	2.3892			0.214196	-1.45524	0.253007			0.383248	-1.37056	0.230135			0.15185	-1.34161	0.269955			-0.0771074	-1.47021	0.755511			0.120783	-1.23025	1.16438			0.130578	0.800439	2.49918			0.0781527	1.86181	2.78678			-0.0162382	2.03641	2.61986			0.135241	2.41985	2.58925
0.115337	2.27001	2.3953			0.188506	-1.44547	0.249671			0.405261	-1.3626	0.228629			0.162298	-1.32985	0.265751			-0.103079	-1.47223	0.748655			0.113811	-1.23452	1.15292			0.109005	0.779379	2.4929			0.0780248	1.84569	2.79315			-0.00207245	2.02329	2.6284			0.139932	2.41783	2.59205
0.109055	2.27217	2.40049			0.156572	-1.4357	0.246126			0.378819	-1.35183	0.226574			0.176246	-1.32234	0.261775			-0.0955132	-1.47293	0.740456			0.100296	-1.24177	1.14007			0.100169	0.762904	2.49065			0.0635141	1.83209	2.797			-0.0146698	2.01132	2.63388			0.107551	2.41026	2.59277
0.110994	2.27239	2.40761			0.154299	-1.42358	0.2431			0.382047	-1.34016	0.223973			0.205155	-1.31456	0.25778			-0.117132	-1.47091	0.734322			0.0913196	-1.25347	1.12855			0.0935656	0.743553	2.48342			0.0725268	1.81893	2.79379			-0.0194488	2.0002	2.64431			0.0975581	2.40095	2.59784
0.110854	2.27174	2.41708			0.158694	-1.41227	0.240052			0.420135	-1.32967	0.22245			0.191854	-1.30868	0.254442			-0.122588	-1.47021	0.726388			0.0995781	-1.2568	1.11679			0.0945389	0.73042	2.48073			0.0866641	1.80274	2.80122			-0.0301931	1.98968	2.64539			0.0796833	2.39344	2.60171
0.11307	2.27259	2.42575			0.134157	-1.39988	0.23626			0.453272	-1.32569	0.220854			0.209604	-1.29574	0.251283			-0.14432	-1.47065	0.720559			0.0831061	-1.26363	1.10422			0.0877401	0.7141	2.48294			0.100941	1.7898	2.8051			-0.0465011	1.97526	2.64981			0.0560566	2.38926	2.6055
0.0988414	2.27093	2.42966			0.124672	-1.38839	0.23255			0.478971	-1.31691	0.219463			0.210146	-1.2866	0.247987			-0.139467	-1.46871	0.712437			0.0878965	-1.27277	1.09625			0.091505	0.699101	2.48114			0.0761145	1.77591	2.81098			-0.0440743	1.96114	2.65957			0.0850727	2.38276	2.61425
0.0886369	2.26664	2.43542			0.124416	-1.37789	0.229767			0.47887	-1.30606	0.217432			0.204505	-1.28299	0.244868			-0.154541	-1.46854	0.706435			0.0744112	-1.27934	1.08423			0.129778	0.680683	2.47609			0.072479	1.76112	2.80878			-0.0194125	1.94802	2.66102			0.0958065	2.37692	2.62821
0.0781296	2.2662	2.44417			0.124395	-1.36839	0.226932			0.465798	-1.29583	0.215165			0.169901	-1.27231	0.242328			-0.149411	-1.46775	0.699724			0.0585432	-1.28241	1.07262			0.116904	0.662809	2.47004			0.0443468	1.74826	2.81203			-0.0151612	1.93229	2.66562			0.113551	2.37064	2.64158
0.0861677	2.2669	2.44991			0.111789	-1.3598	0.223445			0.45034	-1.28669	0.21346			0.162907	-1.26408	0.239447			-0.121176	-1.46423	0.692558			0.0600683	-1.29121	1.06215			0.119511	0.646023	2.46426			0.0586447	1.73665	2.81159			-0.0148262	1.92086	2.66982			0.120975	2.36256	2.65086
0.0788847	2.26287	2.4563			0.137251	-1.34722	0.220716			0.464107	-1.2772	0.211659			0.130904	-1.25774	0.236286			-0.128456	-1.463	0.687487			0.0773858	-1.30154	1.05048			0.119631	0.632424	2.46053			0.0458259	1.72283	2.81693			-0.0223537	1.90643	2.67463			0.122394	2.35245	2.6535
0.0760438	2.2567	2.46367			0.0939857	-1.33691	0.218428			0.478012	-1.26815	0.209221			0.106944	-1.24888	0.233205			-0.107904	-1.45949	0.680157			0.0448679	-1.30581	1.03905			0.116168	0.615404	2.45581			0.0672347	1.70162	2.81426			-0.0335858	1.89278	2.6724			0.105874	2.34581	2.65799
0.0744709	2.25279	2.46865			0.0966593	-1.32967	0.216115			0.528035	-1.25955	0.206732			0.106908	-1.23829	0.230221			-0.123521	-1.45931	0.672244			0.0241936	-1.31025	1.02715			0.0913922	0.596986	2.44822			0.0615644	1.6858	2.82245			-0.0269972	1.87497	2.67913			0.106187	2.33672	2.66636
0.0582378	2.24863	2.47591			0.122155	-1.32044	0.214431			0.517364	-1.24725	0.204136			0.120695	-1.23395	0.227401			-0.126198	-1.45966	0.665726			0.0254896	-1.32288	1.01927			0.102341	0.576781	2.44193			0.0347665	1.67197	2.82667			-0.0217349	1.86047	2.68586			0.103109	2.32684	2.66883
0.0524038	2.2418	2.48458			0.123938	-1.30967	0.212009			0.491305	-1.23594	0.201586			0.104119	-1.22888	0.224279			-0.116696	-1.45773	0.658587			0.0389378	-1.33056	1.00916			0.0984299	0.557897	2.43621			0.0371964	1.6512	2.83809			-0.0245925	1.8472	2.68957			0.0957586	2.31089	2.67347
0.0502466	2.23703	2.49052			0.103076	-1.29945	0.20946			0.497923	-1.22545	0.199403			0.0987911	-1.21911	0.220933			-0.106487	-1.45835	0.651486			0.0444952	-1.33535	0.998625			0.0849502	0.540955	2.43092			0.0469777	1.63398	2.83704			-0.0183122	1.83062	2.70028			0.116645	2.29992	2.67312
0.0359207	2.23191	2.49627			0.0907342	-1.28751	0.206684			0.487625	-1.21785	0.196468			0.0674309	-1.20636	0.218119			-0.123021	-1.45685	0.645234			0.0379613	-1.34465	0.987836			0.0754185	0.523936	2.42572			0.0536723	1.61712	2.83807			-0.0235699	1.81773	2.70971			0.0968084	2.28744	2.67803
0.0458465	2.22359	2.50609			0.0977721	-1.27566	0.204081			0.505253	-1.20608	0.193871			0.0735229	-1.19821	0.215316			-0.130203	-1.45483	0.639626			0.0637869	-1.35345	0.977992			0.0517453	0.506606	2.41648			0.0653308	1.59798	2.84217			-0.0250295	1.80085	2.70984			0.06835	2.27387	2.68183
0.049766	2.21578	2.51351			0.0919052	-1.26444	0.201729			0.47533	-1.19903	0.19097			0.108649	-1.19152	0.212221			-0.131073	-1.45457	0.633348			0.0734078	-1.3584	0.967631			0.0583451	0.486401	2.41082			0.0702202	1.57632	2.84514			-0.0307276	1.78581	2.71418			0.0570583	2.2629	2.68496
0.0375751	2.21254	2.51683			0.0989287	-1.25666	0.199139			0.468479	-1.18681	0.187751			0.113689	-1.18148	0.209729			-0.126383	-1.45422	0.627157			0.0553663	-1.36386	0.956364			0.0474857	0.469148	2.40246			0.0845121	1.56464	2.84218			-0.0121908	1.76809	2.71854			0.041719	2.24998	2.68737
0.029383	2.20845	2.52022			0.0595365	-1.24336	0.196583			0.468354	-1.17949	0.185362			0.0932622	-1.17379	0.206758			-0.14327	-1.4507	0.620966			0.0762398	-1.37086	0.945026			0.049164	0.452285	2.39411			0.0659463	1.54993	2.84032			0.0194747	1.75543	2.72504			0.0626605	2.23642	2.69388
0.0159512	2.20064	2.52517			0.0400915	-1.23096	0.194473			0.460354	-1.17035	0.183827			0.0774906	-1.16673	0.204757			-0.10364	-1.44719	0.616094			0.0757234	-1.37615	0.934623			0.0430614	0.438219	2.38528			0.0883037	1.52893	2.84026			0.029988	1.74047	2.73173			0.0907941	2.22133	2.69685
0.0148072	2.19361	2.52951			0.051851	-1.22002	0.19194			0.474537	-1.16248	0.182009			0.0641542	-1.15533	0.20294			-0.100416	-1.44543	0.612581			0.0696758	-1.38077	0.923523			0.0664167	0.423064	2.38753			0.0600381	1.51422	2.83546			0.0569386	1.72505	2.73673			0.0779304	2.21159	2.69892
0.0243976	2.18784	2.53514			0.0348179	-1.21016	0.189755			0.457273	-1.15397	0.179738			0.0855754	-1.14438	0.201346			-0.0478232	-1.44236	0.607391			0.0659619	-1.3864	0.913558			0.0860991	0.405579	2.38408			0.0837938	1.50018	2.84082			0.0698678	1.70379	2.74426			0.0743414	2.20156	2.70025
0.010038	2.17963	2.54135			0.039462	-1.19948	0.187123			0.453657	-1.14393	0.177624			0.0801689	-1.1395	0.19909			-0.0518904	-1.43919	0.602398			0.0968321	-1.39221	0.904652			0.0874304	0.38755	2.38124			0.0704733	1.48443	2.83871			0.0995972	1.68921	2.74976			0.0662394	2.18872	2.70518
0.00489599	2.17088	2.5452			0.0647418	-1.19143	0.185098			0.420051	-1.13524	0.175627			0.121621	-1.13461	0.196984			-0.0584564	-1.43586	0.597014			0.105386	-1.39699	0.896242			0.0888777	0.372706	2.36908			0.082491	1.47061	2.83906			0.0825282	1.6731	2.7545			0.0797938	2.1732	2.70596
0.00284345	2.16501	2.54703			0.0681648	-1.18319	0.182841			0.416126	-1.12629	0.174091			0.10488	-1.12584	0.195208			-0.0385491	-1.43357	0.590974			0.0906638	-1.40262	0.887839			0.0577417	0.354832	2.35957			0.0686819	1.45523	2.84106			0.0790957	1.6553	2.75462			0.0788915	2.16101	2.71092
-0.00181694	2.15615	2.55074			0.0827413	-1.17044	0.18042			0.408698	-1.11742	0.172185			0.0963764	-1.11588	0.19251			-0.0365087	-1.42777	0.585529			0.0966717	-1.4086	0.877135			0.0656597	0.342087	2.35165			0.0723309	1.44	2.83912			0.0831057	1.63942	2.75843			0.0812646	2.14737	2.7169
0.00577621	2.14291	2.55753			0.052507	-1.1594	0.17782			0.411555	-1.11073	0.170521			0.0922255	-1.10747	0.189844			-0.0249715	-1.42558	0.58049			0.075864	-1.41423	0.869018			0.0744743	0.325535	2.34193			0.0536009	1.41635	2.83768			0.10311	1.62292	2.76106			0.0773878	2.13113	2.72032
0.0131816	2.13313	2.56285			0.0583985	-1.1518	0.175067			0.440629	-1.09942	0.169095			0.106271	-1.1005	0.187648			-0.0554144	-1.42312	0.57573			0.0635483	-1.42089	0.861386			0.0897456	0.304941	2.33514			0.0566171	1.39927	2.84148			0.128563	1.60512	2.7693			0.100781	2.11872	2.72507
0.0129125	2.12385	2.56633			0.0872264	-1.14502	0.172383			0.422164	-1.08684	0.168213			0.104005	-1.092	0.185911			-0.0691342	-1.42154	0.570319			0.0532072	-1.42362	0.852486			0.0727259	0.286523	2.33095			0.0469148	1.38464	2.84003			0.137721	1.5864	2.77683			0.106208	2.10212	2.73137
0.0169236	2.11289	2.57076			0.0651211	-1.13398	0.170131			0.416745	-1.07825	0.167128			0.0914205	-1.08775	0.183619			-0.0517186	-1.4204	0.564698			0.0535599	-1.43378	0.843707			0.0675244	0.266939	2.32373			0.0826314	1.36549	2.83666			0.14133	1.5712	2.77582			0.132692	2.08278	2.7394
0.0190545	2.10072	2.57985			0.0565712	-1.1224	0.168654			0.426065	-1.0692	0.165976			0.0878716	-1.0806	0.180483			-0.0609108	-1.41714	0.559445			0.0419584	-1.436	0.835819			0.0692854	0.25093	2.31705			0.0891985	1.34487	2.83707			0.125969	1.5544	2.77399			0.121709	2.06388	2.74132
0.024278	2.09063	2.58346			0.0726043	-1.11444	0.166683			0.418437	-1.06314	0.164074			0.0716265	-1.06902	0.178563			-0.038124	-1.41135	0.553593			0.0581165	-1.44394	0.827971			0.0861467	0.236009	2.31353			0.0878609	1.32506	2.8426			0.1292	1.53775	2.78012			0.102672	2.04937	2.74457
0.021331	2.07796	2.58854			0.0731499	-1.10322	0.164291			0.435225	-1.05346	0.162364			0.0761222	-1.05807	0.176877			-0.0426866	-1.4124	0.547448			0.0476243	-1.44898	0.822258			0.0673145	0.219534	2.30351			0.0906408	1.30717	2.84707			0.126236	1.51742	2.78136			0.088922	2.03148	2.74784
0.012743	2.06501	2.59572			0.0991694	-1.09146	0.161913			0.410264	-1.04278	0.160529			0.079481	-1.05382	0.173875			-0.0792824	-1.40889	0.541381			0.0624006	-1.45444	0.814434			0.0593948	0.199251	2.29254			0.104616	1.2858	2.84295			0.117022	1.50161	2.77993			0.093203	2.01214	2.74663
0.0119191	2.05483	2.60039			0.082398	-1.08521	0.159735			0.409163	-1.0331	0.158403			0.0827982	-1.04676	0.170941			-0.0525935	-1.40476	0.535191			0.0563728	-1.45607	0.806275			0.0390378	0.182387	2.27945			0.105295	1.26814	2.84671			0.104713	1.48358	2.77901			0.0979848	1.99561	2.74738
0.000310367	2.04713	2.60521			0.0768765	-1.07336	0.157905			0.409312	-1.0246	0.157287			0.0865374	-1.03482	0.167903			-0.055627	-1.40107	0.528593			0.0563946	-1.46025	0.797103			0.0359793	0.168943	2.27301			0.0980794	1.25542	2.83747			0.106047	1.47015	2.77404			0.0810903	1.97901	2.74982
0.00120965	2.03422	2.60826			0.0693388	-1.06223	0.155766			0.381507	-1.01863	0.155837			0.0703089	-1.02623	0.164614			-0.0533742	-1.39694	0.522076			0.0841773	-1.46597	0.789029			0.0198265	0.156042	2.26934			0.106915	1.23531	2.83817			0.0876539	1.45296	2.77333			0.0717959	1.95895	2.75206
-0.00184297	2.01977	2.61562			0.0682262	-1.05111	0.153272			0.388021	-1.01057	0.154336			0.0494175	-1.0189	0.161455			-0.0366042	-1.39325	0.516449			0.0741629	-1.4681	0.781051			0.0134252	0.140888	2.26725			0.0927397	1.21876	2.84024			0.0628748	1.43409	2.77627			0.0831872	1.9451	2.75735
0.00974726	2.00896	2.61747			0.0787096	-1.04423	0.151173			0.378703	-1.00252	0.153108			0.0546524	-1.00867	0.15846			-0.0251409	-1.38798	0.510457			0.0558936	-1.46947	0.772376			0.00418497	0.12348	2.26032			0.0787402	1.20412	2.84103			0.0783498	1.41514	2.77563			0.0876626	1.93247	2.76295
0.00589753	1.9975	2.62594			0.0723845	-1.03392	0.149252			0.358613	-0.995465	0.151451			0.0351136	-1.0027	0.155596			-0.0488337	-1.38631	0.504016			0.0527881	-1.47451	0.764734			-0.00394551	0.10615	2.25407			0.0940619	1.18882	2.83987			0.0622651	1.3958	2.78317			0.0712656	1.91421	2.76774
-0.0109964	1.98336	2.63659			0.0385726	-1.02532	0.147585			0.344101	-0.984066	0.149777			0.0178252	-0.999084	0.152798			-0.0216234	-1.37867	0.498104			0.038646	-1.47758	0.756619			0.0201925	0.0908409	2.24656			0.0968279	1.17204	2.84285			0.0388493	1.38168	2.79326			0.0630788	1.89271	2.77463
-0.0118057	1.97183	2.644			0.0578407	-1.01863	0.145476			0.337336	-0.975562	0.148702			0.0016009	-0.991666	0.150522			-0.0204679	-1.37252	0.491368			0.0305816	-1.47971	0.749696			0.0251282	0.0777851	2.23822			0.101705	1.15614	2.85043			0.0484016	1.36127	2.79362			0.0731003	1.87799	2.77394
-0.00984074	1.95855	2.64917			0.0728543	-1.00831	0.143065			0.357526	-0.968505	0.147028			-0.00677766	-0.981352	0.147928			0.00174153	-1.36997	0.484795			0.0642957	-1.48065	0.741271			0.0481756	0.061854	2.23073			0.0981296	1.14069	2.85651			0.0483399	1.34485	2.78942			0.0898952	1.86153	2.78207
-0.0172198	1.94218	2.65295			0.0619692	-1.0008	0.140705			0.372755	-0.962262	0.14545			-0.0116547	-0.974566	0.145354			0.011229	-1.36496	0.479083			0.0872442	-1.48765	0.73498			0.033662	0.0473993	2.22496			0.0817289	1.11874	2.85961			0.0516842	1.3272	2.79302			0.0782743	1.84061	2.78761
-0.0121433	1.92408	2.65224			0.0816416	-0.992389	0.13827			0.410341	-0.950682	0.143854			-0.00234097	-0.9714	0.142977			0.0223231	-1.36259	0.47229			0.0722368	-1.49098	0.72689			0.0185992	0.0271162	2.21807			0.0893797	1.09826	2.85842			0.038812	1.31078	2.795			0.0844735	1.82228	2.78928
-0.00940854	1.91056	2.65157			0.0731182	-0.985785	0.136484			0.345692	-0.939644	0.141654			0.0175126	-0.962172	0.141174			0.00906205	-1.35749	0.465814			0.0496925	-1.4915	0.719407			0.0116824	0.00846504	2.21356			0.104443	1.08281	2.85817			0.0562885	1.29252	2.79891			0.0864693	1.80503	2.79184
-0.012572	1.89815	2.65777			0.0752016	-0.9771	0.134392			0.340297	-0.930054	0.139432			0.0186653	-0.952491	0.139654			0.0167342	-1.3553	0.459879			0.0404707	-1.49611	0.711596			-0.0102705	-0.00699986	2.20785			0.089352	1.06485	2.85631			0.059927	1.2761	2.79956			0.130997	1.78136	2.79863
-0.0176572	1.87974	2.6611			0.0383433	-0.966605	0.13215			0.354813	-0.920826	0.139987			0.00698628	-0.947696	0.137427			0.0135893	-1.35012	0.453961			0.0445518	-1.50183	0.703403			0.00572184	-0.0206774	2.2006			0.0955832	1.04267	2.84997			0.0495718	1.25838	2.8063			0.12601	1.75928	2.80502
-0.00232209	1.86307	2.66368			0.0665711	-0.958553	0.13016			0.334171	-0.913498	0.138956			0.0159912	-0.939282	0.135465			0.0242793	-1.34379	0.447673			0.0356854	-1.50097	0.695002			0.0186636	-0.0361423	2.19211			0.0860908	1.02027	2.84536			0.0366604	1.24326	2.80619			0.121885	1.74001	2.80847
-0.00185702	1.84804	2.66551			0.139155	-0.949234	0.128432			0.352933	-0.906622	0.137307			0.00797431	-0.927611	0.134177			-0.00737514	-1.34379	0.441608			0.0541803	-1.50405	0.687261			0.00226152	-0.0541717	2.18177			0.087694	1.00357	2.84076			0.0568485	1.22254	2.81548			0.101122	1.72168	2.81387
0.0126655	1.8321	2.66942			0.133932	-0.93883	0.127032			0.36266	-0.896579	0.135853			-0.00171881	-0.922274	0.133456			-9.86459e-05	-1.33992	0.43629			0.0741942	-1.50601	0.678382			-0.00465122	-0.0725897	2.177			0.074262	0.98457	2.84226			0.0509192	1.20774	2.82295			0.0830178	1.69874	2.81535
0.023067	1.81663	2.67385			0.116498	-0.93114	0.125574			0.359602	-0.88717	0.135187			0.00121708	-0.919831	0.13215			0.039777	-1.33325	0.430687			0.0790223	-1.50797	0.669753			0.00815406	-0.0878992	2.16941			0.129827	0.96742	2.84274			0.0636614	1.19086	2.82218			0.108928	1.67709	2.81926
0.0147936	1.80309	2.6728			0.11256	-0.923631	0.12395			0.361216	-0.880023	0.135241			-0.00530354	-0.907074	0.130732			0.0568145	-1.32903	0.426202			0.0798557	-1.50635	0.661062			-0.00513277	-0.102043	2.16114			0.13095	0.953375	2.83788			0.0323044	1.17436	2.82439			0.133161	1.65984	2.82297
0.0165962	1.78849	2.67658			0.116856	-0.911598	0.122957			0.362809	-0.87568	0.134262			-0.0128241	-0.896579	0.129316			0.0936589	-1.32411	0.422427			0.103194	-1.50567	0.653998			-0.00585174	-0.113156	2.15762			0.101335	0.936816	2.82612			0.0158094	1.15671	2.81992			0.116014	1.63985	2.82248
0.0200199	1.77055	2.68035			0.121253	-0.899294	0.122618			0.354036	-0.866543	0.133515			0.0128735	-0.894408	0.12766			0.069315	-1.3184	0.417673			0.10431	-1.51011	0.64635			-0.0113374	-0.127844	2.1511			0.147227	0.918779	2.824			-0.0144946	1.13975	2.82364			0.0889797	1.62224	2.82821
0.0165656	1.75365	2.68167			0.134321	-0.895584	0.122378			0.372937	-0.858943	0.133554			0.00921938	-0.886989	0.12602			0.0650672	-1.31287	0.412894			0.1084	-1.50729	0.639435			0.00247966	-0.143231	2.1454			0.117346	0.901555	2.81843			-0.0130547	1.12272	2.81543			0.11266	1.60413	2.83384
0.02464	1.74048	2.68773			0.131629	-0.886899	0.121386			0.344271	-0.851524	0.13336			-0.000566431	-0.880023	0.124162			0.0978353	-1.30821	0.40863			0.115207	-1.50678	0.63369			-0.0163743	-0.159551	2.1379			0.11282	0.889876	2.81403			-0.00829289	1.10285	2.81056			0.114305	1.58652	2.83605
0.0157682	1.72372	2.69026			0.113373	-0.881561	0.120238			0.338817	-0.844468	0.131915			0.00181468	-0.874595	0.122733			0.0774134	-1.30066	0.404469			0.111584	-1.51062	0.6256			-0.0176169	-0.170664	2.12874			0.129485	0.875978	2.80878			0.00322013	1.08942	2.8057			0.118209	1.56336	2.83687
0.00444783	1.70527	2.69866			0.104378	-0.871066	0.119261			0.351653	-0.834787	0.131492			-0.011045	-0.869438	0.121376			0.0813872	-1.29108	0.401526			0.0951083	-1.50814	0.618047			-0.0182472	-0.186439	2.12542			0.128656	0.856833	2.80263			-0.0305291	1.072	2.80401			0.119232	1.54344	2.83676
0.0156238	1.68868	2.70091			0.0687792	-0.863919	0.118076			0.333443	-0.827097	0.130003			-0.0327789	-0.858219	0.120126			0.0634188	-1.29047	0.396575			0.0944305	-1.50755	0.612349			-0.0247726	-0.20035	2.1173			0.120772	0.838795	2.80101			-0.0125842	1.0529	2.80595			0.0823036	1.52836	2.83756
0.0236166	1.66982	2.70334			0.0564003	-0.856319	0.116718			0.312372	-0.821397	0.127834			-0.0169484	-0.852158	0.119449			0.0917089	-1.2844	0.392595			0.0923766	-1.50951	0.606392			-0.048395	-0.215116	2.10873			0.100178	0.823567	2.79849			-0.0251164	1.03356	2.81404			0.0740413	1.50657	2.83715
0.0300907	1.6494	2.70669			0.038693	-0.85062	0.115621			0.334802	-0.809907	0.126248			-0.0132057	-0.850258	0.11812			0.0728625	-1.27957	0.389163			0.084009	-1.5131	0.599113			-0.0611784	-0.232601	2.09867			0.114792	0.803461	2.80313			-0.010382	1.01898	2.80797			0.0435869	1.48579	2.84217
0.0361856	1.63257	2.70834			0.0310119	-0.844106	0.114193			0.333635	-0.798508	0.125324			-0.000784049	-0.845644	0.117546			0.0756932	-1.27298	0.385509			0.0752353	-1.51002	0.592333			-0.054038	-0.250475	2.09205			0.116417	0.783797	2.8053			-0.0258883	1.0041	2.80577			0.0427032	1.46305	2.84232
0.046687	1.61636	2.70861			0.0448918	-0.836687	0.112205			0.308005	-0.79308	0.124229			0.0284703	-0.833701	0.117494			0.0811132	-1.2714	0.381724			0.0807792	-1.51045	0.584843			-0.055874	-0.263842	2.08235			0.115625	0.769383	2.80155			-0.0350465	0.987292	2.80009			0.0613538	1.44213	2.8418
0.0483363	1.59682	2.71116			0.0272502	-0.827549	0.109929			0.298523	-0.784304	0.122949			0.052265	-0.82764	0.116811			0.0814424	-1.26622	0.377145			0.0928119	-1.51395	0.578889			-0.0495293	-0.276587	2.0771			0.118564	0.751198	2.79934			-0.0194029	0.972253	2.80499			0.0576011	1.41738	2.84292
0.0538123	1.57644	2.71548			0.0307528	-0.82004	0.107855			0.314253	-0.776071	0.122087			0.0501292	-0.823026	0.115833			0.0753945	-1.25937	0.373266			0.117592	-1.51002	0.572915			-0.0429316	-0.293606	2.06591			0.132508	0.72843	2.79371			-0.0182949	0.956063	2.80582			0.0569129	1.39703	2.84732
0.061312	1.55874	2.72117			0.0117428	-0.813074	0.106598			0.305465	-0.770552	0.12042			0.0445452	-0.813164	0.115141			0.0757196	-1.25796	0.369168			0.123775	-1.50849	0.56703			-0.0341608	-0.310858	2.06018			0.136942	0.71298	2.79111			-0.031411	0.937802	2.80667			0.02895	1.38129	2.84192
0.0471848	1.54329	2.7262			-0.00108587	-0.806379	0.105131			0.287984	-0.762048	0.118765			0.0623493	-0.80656	0.115372			0.0711673	-1.25225	0.364835			0.130319	-1.5096	0.560919			-0.0614473	-0.324613	2.05298			0.131856	0.69753	2.78747			-0.0249805	0.920844	2.8095			0.013652	1.35625	2.84057
0.0505647	1.52414	2.72661			0.00871438	-0.79706	0.103302			0.296201	-0.752186	0.117511			0.0495099	-0.802941	0.11423			0.0657719	-1.24531	0.360411			0.131244	-1.50857	0.554894			-0.0803693	-0.338757	2.044			0.134468	0.680898	2.78818			-0.0302209	0.909489	2.80622			0.0127707	1.33367	2.83969
0.0483744	1.50804	2.72942			0.0150725	-0.786023	0.101631			0.262466	-0.746486	0.115885			0.0697232	-0.791994	0.112523			0.0795624	-1.23995	0.355687			0.153798	-1.50379	0.548152			-0.0842658	-0.349482	2.03463			0.143861	0.663526	2.77985			-0.0296333	0.889923	2.80406			0.027482	1.31577	2.84133
0.0386474	1.49163	2.73104			0.00336079	-0.778514	0.100563			0.284126	-0.743501	0.115169			0.067216	-0.782856	0.111528			0.0611668	-1.23433	0.351631			0.133447	-1.50055	0.542507			-0.0737879	-0.362848	2.02525			0.153516	0.649776	2.77742			-0.049681	0.871891	2.80895			0.00739835	1.29701	2.83677
0.0382114	1.47173	2.73226			0.0122564	-0.77019	0.0987238			0.253861	-0.734182	0.113935			0.0445099	-0.777337	0.110492			0.0552958	-1.22695	0.347246			0.114004	-1.50131	0.536027			-0.0793579	-0.374427	2.01695			0.160654	0.636027	2.77533			-0.0256699	0.855855	2.8047			0.0167567	1.27919	2.84795
0.0432528	1.45291	2.73214			-0.0172568	-0.763857	0.0966119			0.259259	-0.72803	0.113466			0.0457133	-0.775799	0.108711			0.0660674	-1.22229	0.342857			0.101506	-1.49816	0.529479			-0.0574003	-0.390436	2.01476			0.15458	0.619246	2.77224			-0.0324733	0.841506	2.8105			-0.00393277	1.25941	2.84849
0.0366151	1.4374	2.73292			0.00015678	-0.758519	0.0950972			0.252003	-0.721064	0.113118			0.0638118	-0.769285	0.106778			0.0572862	-1.21535	0.338504			0.123409	-1.49133	0.523209			-0.0562762	-0.406445	2.00593			0.129529	0.607493	2.7662			-0.0418771	0.822554	2.80983			-0.0167283	1.2408	2.85443
0.0189099	1.42156	2.73267			0.00237444	-0.753815	0.0935798			0.241055	-0.714369	0.112148			0.0691766	-0.761324	0.105029			0.0528131	-1.21026	0.334335			0.127116	-1.49303	0.516875			-0.0629924	-0.41445	1.99752			0.137028	0.595813	2.76454			-0.0479553	0.80905	2.81205			-0.00565384	1.22261	2.85065
0.0214084	1.40039	2.73375			-0.0148161	-0.742868	0.0917793			0.221054	-0.706407	0.111912			0.0794165	-0.757705	0.103367			0.0531189	-1.20086	0.330065			0.134128	-1.49056	0.511115			-0.0560949	-0.426573	1.98972			0.125002	0.577924	2.75828			-0.0544164	0.79286	2.81204			-0.0176274	1.20111	2.85111
0.0185905	1.38024	2.73412			-0.0261565	-0.736896	0.0900271			0.183851	-0.700889	0.110801			0.0490691	-0.751101	0.101273			0.0719399	-1.19515	0.326141			0.135151	-1.48612	0.506044			-0.0593645	-0.441183	1.98383			0.134639	0.557965	2.75407			-0.034472	0.774061	2.80692			-0.0316694	1.18357	2.84852
0.00818758	1.36199	2.73628			-0.0322599	-0.734001	0.0885231			0.195446	-0.694284	0.10901			0.0550032	-0.742868	0.100082			0.0811552	-1.18953	0.322602			0.115104	-1.48381	0.501151			-0.0556293	-0.456259	1.97976			0.143399	0.54392	2.74465			-0.0416245	0.757948	2.80305			-0.0115407	1.16531	2.84716
0.00667312	1.34199	2.73731			-0.0141966	-0.727487	0.0871405			0.191763	-0.682432	0.107521			0.0561536	-0.740696	0.098454			0.09378	-1.18549	0.319341			0.117748	-1.4833	0.495906			-0.0563843	-0.471724	1.97601			0.173816	0.528248	2.7423			-0.0237383	0.7436	2.79602			0.00587454	1.14063	2.84377
-0.0051692	1.3207	2.73517			0.00294724	-0.719978	0.0858271			0.208897	-0.673566	0.107034			0.0577529	-0.737711	0.0965418			0.103249	-1.17978	0.314684			0.124367	-1.48074	0.490855			-0.0449924	-0.487034	1.96921			0.169345	0.507106	2.74151			-0.00345465	0.729558	2.78915			-0.0161578	1.11754	2.83823
-0.0136334	1.30457	2.73598			0.0240477	-0.715183	0.08508			0.212227	-0.667685	0.106507			0.084813	-0.729478	0.0954652			0.0945306	-1.17459	0.310036			0.102122	-1.47502	0.485845			-0.0665729	-0.500711	1.964			0.174961	0.493283	2.73187			-0.0312273	0.71099	2.78846			0.0158493	1.0977	2.8386
-0.0288467	1.28533	2.73328			-0.000824664	-0.707855	0.0847613			0.213896	-0.663162	0.105372			0.0541668	-0.717445	0.0940519			0.0802977	-1.16774	0.305719			0.098224	-1.47587	0.480732			-0.0765438	-0.510348	1.95722			0.196154	0.475172	2.72845			-0.016548	0.696411	2.78542			0.0180817	1.07713	2.83773
-0.0277346	1.26417	2.73439			-0.00538962	-0.698627	0.0849936			0.222492	-0.655019	0.104627			0.0780285	-0.715364	0.092559			0.0878348	-1.16528	0.301309			0.0722965	-1.47246	0.47706			-0.0779675	-0.52659	1.94405			0.171785	0.453882	2.72254			0.00842665	0.681602	2.78636			0.0152362	1.05555	2.83257
-0.0310254	1.24437	2.73574			-0.0156888	-0.693289	0.0850637			0.200714	-0.648596	0.103241			0.0813637	-0.712379	0.0914037			0.0737599	-1.16177	0.297399			0.0707362	-1.46759	0.472263			-0.0812969	-0.541666	1.9333			0.17409	0.436659	2.71002			-0.0030568	0.664875	2.77939			0.00928503	1.03708	2.84179
-0.0332666	1.22885	2.73731			-0.0206869	-0.687227	0.0850513			0.175809	-0.641358	0.102347			0.0638869	-0.702789	0.0905563			0.0849769	-1.15404	0.293058			0.0953534	-1.46324	0.468071			-0.068667	-0.556198	1.92216			0.191634	0.425275	2.70537			0.0208335	0.650373	2.77149			0.0173881	1.01702	2.84206
-0.0230604	1.21176	2.73869			0.00232872	-0.678452	0.0849343			0.174301	-0.632944	0.102905			0.0719533	-0.69736	0.0900389			0.07926	-1.14938	0.288686			0.0982427	-1.45957	0.462281			-0.0478371	-0.565291	1.91312			0.218487	0.41086	2.69111			0.0351935	0.63756	2.7672			-0.00226214	0.994361	2.8361
-0.0353177	1.19209	2.73881			0.0313127	-0.670038	0.0852681			0.163314	-0.629235	0.10122			0.0621603	-0.692837	0.0898685			0.0906336	-1.14218	0.284803			0.0809857	-1.45257	0.45755			-0.0551888	-0.575782	1.90496			0.207973	0.392823	2.68342			0.0774685	0.620909	2.76661			-0.0190201	0.97596	2.83593
-0.0203608	1.17485	2.73741			0.0146122	-0.664971	0.0850443			0.152077	-0.623626	0.100263			0.0758077	-0.682342	0.0901155			0.107189	-1.13752	0.281123			0.0932345	-1.44685	0.452597			-0.0504444	-0.586196	1.89455			0.184529	0.37996	2.67456			0.0587098	0.604106	2.7647			0.00735656	0.962105	2.82931
-0.029178	1.15758	2.73714			-0.00651398	-0.656919	0.0842964			0.135883	-0.618831	0.0998698			0.0851158	-0.676642	0.0897889			0.0829023	-1.13163	0.277506			0.0999391	-1.44113	0.448135			-0.0793855	-0.59863	1.88714			0.171913	0.367763	2.66347			0.0515786	0.588606	2.75973			-0.00570244	0.945724	2.82625
-0.0350467	1.13747	2.73639			-0.0111626	-0.650767	0.0843902			0.140508	-0.612317	0.0992363			0.113149	-0.677999	0.0890622			0.106677	-1.12434	0.27349			0.108018	-1.43873	0.443066			-0.0844881	-0.610986	1.87441			0.16141	0.350096	2.65177			0.0588117	0.57326	2.7595			-0.0308551	0.92523	2.8256
-0.0474354	1.11979	2.73876			-0.00780065	-0.64742	0.084898			0.0998267	-0.605079	0.0998812			0.12014	-0.671938	0.0884051			0.11516	-1.11767	0.270439			0.11636	-1.4331	0.438239			-0.0560333	-0.625363	1.8624			0.146116	0.338933	2.64789			0.0368796	0.558528	2.76184			-0.0243474	0.90589	2.83323
-0.0476426	1.10434	2.74279			-0.00826371	-0.644253	0.0855538			0.0781826	-0.599017	0.0993602			0.126041	-0.663071	0.0882169			0.128712	-1.10914	0.267405			0.122122	-1.42712	0.432259			-0.0719053	-0.632746	1.84895			0.139528	0.328289	2.64389			0.0363716	0.544103	2.76105			-0.0280208	0.889582	2.83271
-0.0416653	1.08456	2.7405			0.0330516	-0.634663	0.0854406			0.0776551	-0.594313	0.0982241			0.121058	-0.658548	0.0877526			0.0948609	-1.10502	0.264285			0.117101	-1.42294	0.428073			-0.0483158	-0.641761	1.83556			0.153969	0.311065	2.63753			0.0232967	0.52845	2.75285			-0.0176065	0.870747	2.83553
-0.0485929	1.06245	2.73962			0.00938016	-0.630954	0.0853499			0.0995263	-0.58798	0.0974852			0.128337	-0.655472	0.0874909			0.122086	-1.09799	0.261671			0.150687	-1.4179	0.423338			-0.0104279	-0.656293	1.82326			0.154098	0.289258	2.62281			0.00887814	0.512107	2.74484			-0.041626	0.851119	2.84242
-0.0516245	1.04344	2.74007			0.0536422	-0.627154	0.0858012			0.0979616	-0.581194	0.0966524			0.11877	-0.650677	0.0865659			0.0853175	-1.09298	0.258688			0.146186	-1.41338	0.419453			-0.0187748	-0.67168	1.81281			0.179966	0.274695	2.61878			0.00288979	0.49561	2.73678			-0.0356619	0.83647	2.83853
-0.0445332	1.02661	2.7421			0.0335755	-0.625797	0.0852162			0.0798152	-0.572328	0.0960027			0.131019	-0.646424	0.086038			0.0730734	-1.08876	0.255439			0.150484	-1.40979	0.41582			-0.00526352	-0.684114	1.8054			0.172895	0.261389	2.61409			0.00856675	0.483487	2.73374			-0.0589643	0.814317	2.83747
-0.0343364	1.00606	2.74193			0.0328301	-0.616026	0.0848007			0.0831282	-0.565633	0.095922			0.12528	-0.643891	0.0862278			0.0545335	-1.08261	0.252475			0.123689	-1.40646	0.410988			-0.00863387	-0.696781	1.79534			0.158594	0.2418	2.60774			0.017513	0.469062	2.72453			-0.0545093	0.791946	2.83202
-0.048396	0.986717	2.74062			0.0517062	-0.60906	0.0845296			0.0725787	-0.558667	0.0941715			0.127719	-0.637287	0.0866317			0.0832338	-1.0769	0.249821			0.125935	-1.3998	0.407824			-0.00586052	-0.70704	1.78257			0.171031	0.224797	2.59744			0.00624402	0.454253	2.71663			-0.0932823	0.772751	2.83867
-0.0337249	0.969122	2.74214			0.0525887	-0.606979	0.0846966			0.0508869	-0.554324	0.093226			0.134684	-0.627697	0.0863649			0.0659922	-1.07251	0.246677			0.128736	-1.3946	0.404305			-0.0138662	-0.719007	1.76913			0.188361	0.208313	2.58486			0.000550289	0.440058	2.70839			-0.0948061	0.755577	2.83501
-0.0477735	0.950019	2.7406			0.0381718	-0.596846	0.084526			0.0649832	-0.54971	0.0930461			0.161329	-0.623264	0.0851688			0.0618606	-1.06829	0.244055			0.109205	-1.3905	0.401667			-0.016798	-0.730975	1.7577			0.203457	0.189832	2.5722			-0.0213785	0.422487	2.70271			-0.0778347	0.735949	2.8294
-0.0593877	0.930192	2.74243			0.0440096	-0.592775	0.0835797			0.0514933	-0.541839	0.0927848			0.171582	-0.622721	0.0841254			0.0194677	-1.06443	0.241193			0.114837	-1.38631	0.397259			-0.0232752	-0.745818	1.74654			0.197545	0.171869	2.55823			-0.0118638	0.411668	2.699			-0.0777026	0.716104	2.83112
-0.078048	0.914021	2.74329			0.0633645	-0.588794	0.0827518			0.0324571	-0.534692	0.0929103			0.198387	-0.61494	0.0832892			0.0119403	-1.05793	0.238574			0.0902335	-1.37846	0.392947			-0.00353969	-0.75662	1.73714			0.162875	0.159672	2.54803			0.00080689	0.396783	2.69443			-0.0436992	0.699146	2.82326
-0.063849	0.89949	2.74221			0.0839463	-0.58038	0.0818615			0.0227687	-0.530982	0.0924368			0.235745	-0.605169	0.0830048			0.00548126	-1.05213	0.235543			0.0714731	-1.37325	0.388739			0.014624	-0.766257	1.7233			0.139677	0.147179	2.54356			-0.00350951	0.384736	2.6897			-0.0261925	0.679951	2.82163
-0.0648234	0.880343	2.74554			0.0973229	-0.570971	0.080492			-0.0192293	-0.527001	0.0912325			0.22855	-0.601731	0.082132			0.00345088	-1.0451	0.232133			0.0692671	-1.36693	0.383734			0.042312	-0.772863	1.71394			0.146293	0.128625	2.5366			0.0140344	0.3687	2.68175			-0.0380341	0.661621	2.81792
-0.0626295	0.861895	2.74379			0.12505	-0.565995	0.0784083			-0.0645663	-0.521664	0.0906085			0.245536	-0.59757	0.0816045			0.0315862	-1.03904	0.228879			0.0989302	-1.35669	0.380575			0.043325	-0.783432	1.70699			0.13371	0.115023	2.52753			0.025663	0.353968	2.68094			-0.0499749	0.649065	2.81234
-0.0478936	0.84673	2.74375			0.135831	-0.564547	0.0773011			-0.0793811	-0.519764	0.089481			0.247639	-0.589608	0.080373			0.0477507	-1.03509	0.226197			0.0918656	-1.35003	0.376286			0.0280095	-0.795477	1.69601			0.146204	0.101273	2.51796			0.0346588	0.337548	2.6714			-0.064539	0.636365	2.81092
-0.0416144	0.830274	2.74449			0.142695	-0.556405	0.0755905			-0.0563313	-0.512164	0.0878024			0.260295	-0.588251	0.0793821			0.0446705	-1.02683	0.223031			0.069806	-1.34516	0.371662			0.0319195	-0.805735	1.68477			0.146619	0.08745	2.50719			0.0166938	0.32412	2.6652			-0.0411689	0.616159	2.80523
-0.0483372	0.81163	2.74484			0.143991	-0.554867	0.074066			-0.0436829	-0.50565	0.0875056			0.283758	-0.586532	0.078692			0.015087	-1.01848	0.220046			0.0373822	-1.34064	0.367133			0.0327962	-0.814128	1.67021			0.139016	0.0739961	2.49768			0.0219374	0.310462	2.66587			-0.0586137	0.598191	2.79662
-0.0535758	0.79548	2.74378			0.113768	-0.550705	0.0725665			-0.0512673	-0.499498	0.0870627			0.261683	-0.580289	0.0781086			0.00543987	-1.01198	0.217275			0.0140321	-1.33142	0.363311			0.0380396	-0.823609	1.65499			0.162674	0.0606901	2.48829			-0.0218018	0.29619	2.66166			-0.0504061	0.583037	2.79676
-0.0594217	0.779068	2.74627			0.131099	-0.544824	0.0709493			-0.0365198	-0.498141	0.0856035			0.287059	-0.572871	0.0767326			0.022379	-1.00495	0.214651			0.0104267	-1.32416	0.359849			0.0483911	-0.831691	1.64152			0.150645	0.0464232	2.47667			-0.0269507	0.282533	2.65348			-0.0416847	0.570625	2.79378
-0.0675855	0.75841	2.74542			0.0977926	-0.539125	0.0691654			-0.0270516	-0.493074	0.0845096			0.279844	-0.569523	0.0759011			0.00596829	-1.001	0.212462			0.0183057	-1.32271	0.35554			0.0523796	-0.841561	1.62996			0.117125	0.0244683	2.46777			-0.0594739	0.263811	2.64305			-0.0460049	0.549193	2.78563
-0.0641059	0.738584	2.74424			0.0981798	-0.538853	0.0680924			-0.0153074	-0.483756	0.0859475			0.254497	-0.566357	0.0752327			-0.00244103	-0.995027	0.209589			-0.000362754	-1.31528	0.35213			0.033967	-0.856249	1.61985			0.135629	0.00850106	2.45528			-0.0590469	0.252225	2.6298			-0.0719504	0.531297	2.77723
-0.0552721	0.72425	2.74255			0.110685	-0.535234	0.0668744			0.00254521	-0.478689	0.0861134			0.262435	-0.560476	0.0739776			-0.0152444	-0.99248	0.206619			-0.0096184	-1.30931	0.350218			0.023742	-0.867129	1.60899			0.144503	-0.00628339	2.44168			-0.0598694	0.23826	2.6212			-0.0554475	0.516864	2.77441
-0.0544854	0.707838	2.73908			0.0740806	-0.527816	0.0661158			-0.0114817	-0.472085	0.0852686			0.266259	-0.558576	0.0727216			0.00397596	-0.985628	0.203967			-0.0165734	-1.30546	0.347071			0.0171594	-0.876998	1.59673			0.173393	-0.022842	2.42834			-0.0843874	0.226674	2.61099			-0.0644623	0.494133	2.76928
-0.0619075	0.688384	2.73735			0.0714421	-0.523202	0.0656866			-0.0030195	-0.465481	0.0850863			0.273047	-0.554234	0.0714331			0.024982	-0.979214	0.201886			0.00111342	-1.29983	0.344823			0.0143063	-0.887179	1.58249			0.140411	-0.0408051	2.4186			-0.108404	0.211865	2.60871			-0.0367821	0.476309	2.7643
-0.0677245	0.67114	2.73376			0.0558645	-0.518588	0.0650555			-0.00246106	-0.462314	0.0843759			0.254347	-0.54591	0.0706509			0.0263083	-0.973329	0.199661			0.00830665	-1.29155	0.341739			-0.000648809	-0.897592	1.57148			0.132822	-0.0618729	2.40772			-0.11752	0.198667	2.60395			-0.0386381	0.461444	2.75962
-0.0514686	0.654487	2.73038			0.042565	-0.512707	0.0641156			0.00967255	-0.458695	0.0850627			0.27966	-0.540301	0.0695624			0.0267935	-0.972889	0.19779			0.0173778	-1.28608	0.338367			0.0238462	-0.910803	1.55923			0.148418	-0.0777662	2.39364			-0.115128	0.182477	2.5936			-0.0495246	0.444197	2.75651
-0.049702	0.637287	2.72858			0.0499698	-0.508093	0.0631038			0.0186442	-0.453719	0.0844929			0.283502	-0.53831	0.0678193			0.00260546	-0.96797	0.195384			-0.0169449	-1.28335	0.334359			0.00737988	-0.921372	1.54488			0.138648	-0.0952857	2.38038			-0.112765	0.170661	2.59053			-0.0455563	0.42594	2.74993
-0.0443529	0.622056	2.72592			0.0308753	-0.503569	0.0628378			0.0215588	-0.445124	0.0846148			0.277335	-0.534963	0.0663733			0.0110325	-0.960503	0.19333			0.0225328	-1.27302	0.331702			0.0101533	-0.930076	1.53188			0.116445	-0.108887	2.36968			-0.105717	0.157694	2.58266			-0.0405904	0.408837	2.75148
-0.0425813	0.609627	2.72124			0.00252078	-0.496241	0.0617992			0.01355	-0.442863	0.0847542			0.290317	-0.525192	0.0651476			-0.022032	-0.955144	0.191344			-0.0141128	-1.26619	0.328045			0.00546388	-0.936604	1.51969			0.111677	-0.120567	2.36203			-0.103013	0.143115	2.57061			-0.0414752	0.394405	2.74491
-0.0360505	0.59479	2.71991			0.0279507	-0.487284	0.0607396			-0.00169453	-0.442591	0.0848453			0.260284	-0.519492	0.0637668			0.0264386	-0.948028	0.189357			-0.0135067	-1.25723	0.325061			-0.0151516	-0.944375	1.51137			0.0972532	-0.137643	2.34748			-0.100604	0.130378	2.56			-0.0444432	0.378457	2.7403
-0.0171999	0.57597	2.71763			0.0286648	-0.484932	0.0597506			-0.000148871	-0.435172	0.0859009			0.248847	-0.518949	0.0620797			0.00120525	-0.942581	0.187616			-0.021579	-1.25321	0.323073			0.014697	-0.954089	1.50013			0.0920932	-0.152871	2.33598			-0.0842116	0.115876	2.55772			-0.0454651	0.363736	2.72884
-0.0180068	0.561046	2.71548			0.0680544	-0.48267	0.0585591			0.0213762	-0.433906	0.0870456			0.250832	-0.511259	0.0607701			-0.00549547	-0.936871	0.185643			-0.0274381	-1.24186	0.320559			0.0226855	-0.965125	1.49022			0.0907197	-0.167434	2.32614			-0.104171	0.100607	2.54498			-0.0448114	0.352551	2.71823
-0.014975	0.548989	2.71269			0.0760691	-0.478328	0.0578392			0.00943173	-0.429201	0.086987			0.23318	-0.507912	0.0592975			0.0109798	-0.931512	0.183314			-0.0246993	-1.23494	0.318337			0.00848859	-0.975771	1.47956			0.0956092	-0.178374	2.31125			-0.0919906	0.085645	2.53455			-0.0325258	0.337541	2.70796
-0.00762926	0.532554	2.71197			0.0799692	-0.47308	0.0573461			-0.0110122	-0.423321	0.0867469			0.252193	-0.506374	0.0579107			0.00445753	-0.92097	0.180881			-0.0094619	-1.23136	0.314078			0.0359212	-0.981989	1.46553			0.118103	-0.190571	2.30194			-0.137392	0.0745192	2.52263			-0.0128791	0.318635	2.70097
-0.0043902	0.516076	2.7093			0.0770258	-0.468828	0.056826			0.000687111	-0.420064	0.0867236			0.258383	-0.502122	0.0568533			0.0561979	-0.914381	0.178507			-0.0230492	-1.22077	0.310906			0.0492836	-0.989294	1.45542			0.117794	-0.209643	2.28739			-0.137765	0.0618589	2.51518			-0.0384969	0.305357	2.69136
-0.00121007	0.502115	2.70717			0.0513409	-0.466023	0.0560069			-0.00428263	-0.416173	0.0870431			0.242414	-0.495065	0.0561771			0.0660586	-0.909813	0.176815			-0.0565054	-1.21369	0.307551			0.0556487	-0.997842	1.44402			0.121086	-0.225537	2.2742			-0.123924	0.0451319	2.50746			-0.0272752	0.292223	2.68322
0.00488147	0.484696	2.70632			0.0286004	-0.463038	0.0546351			-0.0423155	-0.412193	0.0870342			0.241699	-0.491536	0.0552784			0.0745971	-0.905509	0.174195			-0.0473578	-1.20942	0.30405			0.0375933	-1.00888	1.43255			0.120235	-0.240913	2.25785			-0.134025	0.0271004	2.49687			-0.0317129	0.276276	2.67931
0.0029598	0.466621	2.70094			0.0239787	-0.460595	0.0535682			-0.0450524	-0.403688	0.0861764			0.256359	-0.49217	0.055046			0.0641357	-0.900853	0.172387			-0.0279042	-1.20404	0.300955			0.0242061	-1.02108	1.42318			0.129237	-0.261241	2.24273			-0.119247	0.0185835	2.48589			-0.0214376	0.258091	2.67227
-0.00287864	0.452178	2.69606			0.00621095	-0.457157	0.0529448			-0.0582564	-0.398803	0.0856538			0.225744	-0.48656	0.054263			0.0615268	-0.89523	0.170685			-0.0530665	-1.19636	0.297325			0.0422906	-1.03235	1.41073			0.12797	-0.27743	2.23183			-0.112643	0.00270051	2.47437			-0.0186188	0.243658	2.66123
0.00192622	0.439639	2.68959			-0.0206019	-0.452453	0.0524609			-0.0611814	-0.395636	0.0863317			0.224774	-0.48068	0.0532313			0.0339831	-0.890662	0.169006			-0.068881	-1.19115	0.293949			0.0615432	-1.04004	1.40063			0.125394	-0.293028	2.21758			-0.108739	-0.00919255	2.45733			-0.00302492	0.226123	2.65156
0.012349	0.423204	2.68829			-0.0440701	-0.446662	0.051683			-0.0405197	-0.389665	0.0866767			0.229066	-0.476428	0.0524955			0.0229016	-0.885128	0.167302			-0.0874137	-1.18568	0.290911			0.0386394	-1.04727	1.39199			0.132628	-0.312026	2.20077			-0.139264	-0.0229271	2.45159			-0.0306128	0.207938	2.64468
0.00969969	0.405479	2.68517			-0.0565142	-0.440963	0.0504495			-0.0473712	-0.387946	0.0869328			0.23786	-0.473171	0.051646			0.036025	-0.880384	0.164987			-0.108849	-1.17655	0.288245			0.0403612	-1.05955	1.3787			0.132139	-0.333907	2.18937			-0.12822	-0.0363548	2.44154			-0.0616764	0.195237	2.63415
0.0231635	0.398477	2.6836			-0.0777605	-0.438972	0.0494392			-0.0434821	-0.384327	0.0866242			0.21759	-0.465028	0.0511297			0.0520593	-0.877221	0.162522			-0.0995614	-1.1698	0.284219			0.0377505	-1.07081	1.366			0.113171	-0.349948	2.17643			-0.0903323	-0.0536956	2.43102			-0.0616835	0.181527	2.63149
0.0311188	0.379351	2.68073			-0.0827596	-0.433634	0.0496073			-0.042807	-0.378537	0.0858847			0.199733	-0.462676	0.0501905			0.0283071	-0.87195	0.160534			-0.088786	-1.16562	0.282121			0.0276775	-1.08123	1.35703			0.127371	-0.363549	2.1624			-0.0836283	-0.0651283	2.42105			-0.0534378	0.164063	2.62369
0.0221477	0.365389	2.67755			-0.0861523	-0.426759	0.050141			0.0109829	-0.372837	0.0851789			0.174995	-0.460414	0.0493972			0.00425023	-0.864132	0.158863			-0.0733354	-1.15828	0.278812			0.0243623	-1.08745	1.34654			0.131679	-0.380921	2.14941			-0.0726855	-0.0756402	2.40933			-0.0664808	0.146889	2.612
0.0113645	0.354491	2.67294			-0.0911244	-0.420064	0.0492537			-0.00917152	-0.371932	0.0839745			0.188939	-0.451548	0.0485111			-0.0131348	-0.8593	0.157198			-0.0770213	-1.14778	0.275035			0.0366744	-1.09335	1.33351			0.155807	-0.396297	2.14273			-0.0351607	-0.0903723	2.39557			-0.067044	0.134405	2.60329
-0.00440217	0.341405	2.66713			-0.0798197	-0.416173	0.0490185			-0.0287668	-0.370847	0.082995			0.148969	-0.446572	0.047602			-0.0210069	-0.854556	0.155407			-0.101355	-1.13941	0.272067			0.0439257	-1.1019	1.31956			0.168278	-0.408568	2.12603			-0.01336	-0.106332	2.38341			-0.0665534	0.121776	2.60103
-0.017545	0.325321	2.6613			-0.084716	-0.412012	0.0490271			-0.0245682	-0.367047	0.0817687			0.125943	-0.443586	0.0475531			-0.00643835	-0.849724	0.154245			-0.12371	-1.13429	0.26903			0.0510205	-1.11053	1.3051			0.162678	-0.426753	2.10896			-0.00492725	-0.119606	2.37481			-0.072166	0.111385	2.58685
-0.0205141	0.311382	2.65556			-0.0424508	-0.408664	0.0483961			-0.0356331	-0.364333	0.0817822			0.125362	-0.442863	0.0466593			0.00644969	-0.843575	0.153567			-0.101705	-1.12379	0.265991			0.0485428	-1.11977	1.2909			0.142068	-0.441759	2.09368			-0.0353011	-0.134415	2.36388			-0.0717349	0.0973855	2.5771
-0.0213918	0.301644	2.64628			-0.0678097	-0.406674	0.0476747			-0.0271025	-0.360714	0.0800315			0.130272	-0.436891	0.0456655			0.0126548	-0.839621	0.152705			-0.108026	-1.11636	0.262502			0.0149231	-1.12871	1.277			0.150673	-0.452995	2.07963			-0.0301975	-0.148687	2.35154			-0.0679219	0.0834582	2.5711
-0.0213622	0.289608	2.64059			-0.0639756	-0.402693	0.0466497			-0.0270943	-0.357005	0.0786411			0.110334	-0.431825	0.0448428			-0.0119575	-0.828377	0.151344			-0.108367	-1.11064	0.258855			0.00321027	-1.13306	1.26396			0.150906	-0.467041	2.06561			-0.012453	-0.162651	2.3402			-0.0646489	0.0683041	2.56345
-0.0170374	0.272714	2.63168			-0.0491474	-0.39826	0.0460717			-0.0165849	-0.3542	0.0771899			0.0847759	-0.431825	0.045001			0.0348133	-0.821349	0.150557			-0.0991576	-1.10295	0.255885			0.002056	-1.14076	1.2501			0.14161	-0.485152	2.05091			0.00467793	-0.176386	2.32778			-0.0503924	0.0540882	2.55086
-0.0163896	0.259563	2.62641			-0.0614513	-0.395274	0.0457548			0.00244182	-0.350219	0.0770695			0.0776033	-0.42712	0.0450545			0.050038	-0.818625	0.149951			-0.0561084	-1.09365	0.252996			0.0347418	-1.15164	1.23832			0.152429	-0.50548	2.03968			0.016161	-0.194341	2.31489			-0.042595	0.0441298	2.5402
-0.00659837	0.245448	2.61953			-0.0316749	-0.39455	0.0448719			0.00100201	-0.347053	0.0761782			0.078859	-0.419883	0.0456092			0.0820931	-0.813882	0.149059			-0.0342874	-1.08912	0.249315			0.0283541	-1.16283	1.22554			0.138508	-0.518195	2.02648			0.0343772	-0.210224	2.30178			-0.0542944	0.0289036	2.53495
-0.0219364	0.230458	2.61361			-0.055083	-0.391293	0.0442168			0.00900037	-0.339815	0.0750716			0.0745397	-0.420425	0.0454608			0.105428	-0.809665	0.147725			-0.0483679	-1.08477	0.246762			0.0385606	-1.17169	1.21432			0.144696	-0.538449	2.01436			0.0181838	-0.22181	2.28425			-0.0579653	0.0113682	2.5223
-0.0139066	0.21735	2.60804			-0.0547271	-0.38686	0.0441038			0.0369749	-0.335472	0.0743074			0.0518197	-0.417983	0.0455462			0.0872356	-0.803955	0.146534			-0.0289747	-1.07768	0.243832			0.0431355	-1.18156	1.20247			0.14248	-0.557817	2.0023			0.00297738	-0.234777	2.26774			-0.0697818	-0.00537344	2.51007
-0.0126813	0.205467	2.60182			-0.0547618	-0.383241	0.0434077			0.0588109	-0.333301	0.074383			0.0279922	-0.410926	0.0454768			0.110206	-0.798332	0.145668			-0.00574189	-1.07017	0.241255			0.0264957	-1.18995	1.19143			0.129629	-0.572232	1.99159			0.0269237	-0.248972	2.25323			-0.0510272	-0.0205997	2.50303
-0.00155408	0.192338	2.59684			-0.0513986	-0.377723	0.0430603			0.0627709	-0.328054	0.0741822			0.0290149	-0.406764	0.0449189			0.14009	-0.794818	0.144082			-0.00655139	-1.06607	0.239068			0.00959849	-1.19694	1.17882			0.131512	-0.589678	1.97826			0.0132458	-0.265162	2.2362			-0.0618828	-0.0356815	2.492
0.00160949	0.175706	2.59004			-0.0648325	-0.371842	0.0424703			0.044058	-0.32733	0.0733749			0.0192147	-0.404412	0.0440724			0.154381	-0.789284	0.141645			0.00481745	-1.05702	0.236262			0.0268033	-1.20806	1.16616			0.123718	-0.612298	1.96482			-0.00353635	-0.280508	2.22133			-0.066137	-0.0508356	2.48501
-0.00398803	0.16459	2.58422			-0.0940058	-0.37148	0.041256			0.0234154	-0.320816	0.0735282			0.00266431	-0.398803	0.0434688			0.177643	-0.785418	0.140134			0.0105073	-1.05164	0.234093			0.0388198	-1.21808	1.15322			0.106873	-0.629522	1.95108			-0.00655458	-0.2957	2.20575			-0.0896767	-0.0636083	2.47313
-0.00529523	0.155902	2.57726			-0.111003	-0.368766	0.0406063			0.0426401	-0.318192	0.0730255			0.00577749	-0.393917	0.0437517			0.143558	-0.780235	0.139358			0.00410396	-1.04345	0.232447			0.0262796	-1.22655	1.14077			0.130363	-0.639945	1.93163			-0.0262996	-0.30767	2.19324			-0.0903214	-0.078618	2.46049
-0.0185204	0.142969	2.57094			-0.079839	-0.360081	0.0396266			0.0649463	-0.316745	0.0741368			-0.0180958	-0.392017	0.0425887			0.143112	-0.774349	0.137958			-0.0227675	-1.03636	0.230377			0.0593277	-1.23098	1.12921			0.125296	-0.657538	1.9157			-0.051693	-0.31941	2.17971			-0.100751	-0.097308	2.44907
-0.0167148	0.129555	2.56328			-0.0767819	-0.354562	0.0390872			0.0661275	-0.316111	0.0744605			-0.0304764	-0.387222	0.0418417			0.1285	-0.76899	0.136261			-0.0220539	-1.02791	0.227735			0.0348595	-1.23572	1.11636			0.11064	-0.675797	1.90313			-0.0616438	-0.335676	2.16999			-0.0920196	-0.108998	2.43686
-0.00183962	0.118526	2.55637			-0.0990892	-0.353295	0.0389863			0.0772548	-0.314121	0.0736822			-0.0373755	-0.379532	0.0421499			0.112796	-0.763104	0.134369			0.00925367	-1.01835	0.225269			0.0108942	-1.24582	1.1039			0.0873962	-0.689103	1.88917			-0.0649879	-0.351559	2.15529			-0.0890632	-0.118452	2.42093
-0.00410728	0.106381	2.549			-0.0951752	-0.349224	0.0384254			0.0581301	-0.310502	0.0740972			-0.0342283	-0.37908	0.0419939			0.0718695	-0.759766	0.133354			0.00680052	-1.01169	0.22386			-0.0116458	-1.25165	1.09323			0.0575645	-0.703518	1.87252			-0.0519193	-0.367826	2.13983			-0.0891612	-0.129204	2.40349
-0.00901749	0.0923974	2.53884			-0.0987226	-0.344339	0.0381434			0.0513658	-0.307607	0.0747604			-0.0544388	-0.379894	0.0409874			0.0657155	-0.753265	0.132116			0.00321202	-1.00588	0.222217			-0.016396	-1.2602	1.08255			0.0653263	-0.719041	1.8591			-0.0528304	-0.381177	2.12708			-0.0659164	-0.145007	2.39089
-0.00533165	0.0814778	2.53079			-0.0988284	-0.345424	0.0373044			0.0392805	-0.303898	0.0748475			-0.0696881	-0.374647	0.0396739			0.0490664	-0.746852	0.13029			0.0108893	-0.998371	0.220127			-0.0131283	-1.26867	1.06997			0.0276301	-0.730573	1.84561			-0.0711492	-0.396523	2.11438			-0.0526296	-0.158141	2.37599
-0.0170809	0.0727902	2.51951			-0.115611	-0.341986	0.0370113			0.0174619	-0.301636	0.0737103			-0.106909	-0.368676	0.0385535			0.0619397	-0.741669	0.128603			-0.0165037	-0.989492	0.21813			-0.0304619	-1.27116	1.05877			0.0199284	-0.744692	1.83293			-0.064618	-0.411331	2.10102			-0.0678996	-0.17012	2.3609
-0.0207654	0.0579534	2.51251			-0.117978	-0.336829	0.0366422			0.0125154	-0.299284	0.072699			-0.123591	-0.367771	0.0367999			0.059508	-0.732357	0.127018			0.00227516	-0.982491	0.216653			-0.0388252	-1.27815	1.04568			0.0162967	-0.761621	1.81977			-0.0569892	-0.427751	2.08673			-0.0928339	-0.185202	2.3432
-0.038953	0.0417162	2.50517			-0.102634	-0.334658	0.0358845			-0.00526439	-0.297022	0.0719918			-0.131495	-0.364061	0.0351913			0.0694775	-0.730337	0.125685			0.0125142	-0.976429	0.215408			-0.0669159	-1.28795	1.0348			0.0346024	-0.781801	1.80612			-0.0576407	-0.445783	2.06951			-0.0648013	-0.199201	2.33139
-0.0360719	0.0300087	2.4961			-0.0950467	-0.335653	0.0350065			0.0189494	-0.292408	0.0720185			-0.106563	-0.360623	0.0334659			0.0832969	-0.724011	0.123513			0.00768899	-0.969599	0.213449			-0.0528066	-1.29945	1.02313			0.0586741	-0.79666	1.79139			-0.0859846	-0.459441	2.05392			-0.0791195	-0.211252	2.31655
-0.0457397	0.0177979	2.4873			-0.103846	-0.333844	0.0339786			0.0232502	-0.288879	0.0724952			-0.114988	-0.358633	0.0317856			0.0791004	-0.720497	0.120988			0.0638381	-0.964989	0.212171			-0.0295869	-1.30761	1.01149			0.0829516	-0.81344	1.77932			-0.0608677	-0.475707	2.04053			-0.0800186	-0.228571	2.30122
-0.0436148	0.0036833	2.47955			-0.134234	-0.32733	0.0334383			0.0171508	-0.282999	0.0722933			-0.1213	-0.357367	0.0307296			0.0826785	-0.714963	0.118505			0.0706892	-0.959098	0.211434			-0.0586546	-1.31351	1.00071			0.0856031	-0.833325	1.76563			-0.0683471	-0.490516	2.02648			-0.0420448	-0.247261	2.28737
-0.0395178	-0.00962163	2.46914			-0.127026	-0.325882	0.033637			0.00827014	-0.280375	0.0716172			-0.0948727	-0.351214	0.0296562			0.089736	-0.708374	0.115897			0.0582192	-0.952012	0.209127			-0.0874938	-1.3209	0.988368			0.093332	-0.849292	1.75231			-0.0659763	-0.50379	2.01345			-0.0144582	-0.262704	2.27371
-0.0358266	-0.0225983	2.45668			-0.137822	-0.321087	0.0331135			0.00505933	-0.279199	0.0707496			-0.112091	-0.346691	0.0286061			0.0980555	-0.705914	0.113408			0.044884	-0.943987	0.206396			-0.0844704	-1.32719	0.976526			0.098189	-0.866073	1.73697			-0.054729	-0.522129	1.99781			-0.0178233	-0.274827	2.26058
-0.0382324	-0.0361877	2.45			-0.112965	-0.317197	0.0321021			0.0174856	-0.277208	0.0702373			-0.104927	-0.346148	0.0273823			0.0855781	-0.703894	0.111396			0.0599129	-0.939974	0.204147			-0.0905048	-1.33683	0.966463			0.0908093	-0.884701	1.72319			-0.0760366	-0.537781	1.98209			-0.00501077	-0.291713	2.24489
-0.0408697	-0.0499303	2.43933			-0.115674	-0.316654	0.0310151			0.0103768	-0.273137	0.0695516			-0.0947633	-0.342529	0.0264406			0.0761799	-0.697217	0.109154			0.0564662	-0.932034	0.201536			-0.0838624	-1.34693	0.955764			0.104909	-0.903256	1.70701			-0.0799223	-0.553204	1.96619			0.00905919	-0.307589	2.22786
-0.027394	-0.0587055	2.42921			-0.114797	-0.315026	0.0301485			0.0330066	-0.269428	0.0696037			-0.0734528	-0.33692	0.026029			0.0723716	-0.691068	0.107194			0.0483261	-0.925887	0.198776			-0.0759097	-1.35081	0.944213			0.103313	-0.913827	1.69599			-0.0962675	-0.567552	1.95337			0.0355798	-0.320939	2.21585
-0.0298112	-0.0688811	2.41903			-0.0987198	-0.304983	0.0295747			-0.0118212	-0.268342	0.0694938			-0.0726372	-0.332758	0.0258925			0.0761833	-0.686587	0.104871			0.0899076	-0.917862	0.195903			-0.0641427	-1.35524	0.93294			0.112841	-0.92935	1.68003			-0.0983302	-0.581747	1.93828			0.0498845	-0.337969	2.20039
-0.0234017	-0.0849871	2.40717			-0.100447	-0.30055	0.0287024			-0.0276001	-0.267075	0.071236			-0.0772365	-0.331944	0.0253024			0.062703	-0.681229	0.102877			0.0855782	-0.911374	0.193622			-0.0692356	-1.35828	0.921679			0.142186	-0.946352	1.66378			-0.0862881	-0.597784	1.92244			0.0499081	-0.352546	2.1843
-0.0281283	-0.0959286	2.39479			-0.120839	-0.299826	0.0280594			-0.0244197	-0.263999	0.0713718			-0.0431718	-0.327239	0.0250442			0.0794558	-0.673674	0.100926			0.0897548	-0.900872	0.191364			-0.0695562	-1.3683	0.910528			0.157288	-0.959437	1.64856			-0.0729548	-0.615355	1.90437			0.047283	-0.36171	2.17069
-0.0242611	-0.106082	2.38439			-0.140591	-0.298198	0.0276142			-0.0175729	-0.26418	0.0718861			-0.0423461	-0.324525	0.0251217			0.0852787	-0.671917	0.0989264			0.0951912	-0.894384	0.188612			-0.0602559	-1.37405	0.899007			0.143181	-0.972447	1.63862			-0.0750451	-0.634921	1.88877			0.0235045	-0.372246	2.15448
-0.0174164	-0.119803	2.37086			-0.125583	-0.295303	0.0275541			-0.0308865	-0.261376	0.0715285			-0.0505649	-0.324344	0.0256791			0.142088	-0.666031	0.097379			0.101653	-0.888237	0.18617			-0.0426478	-1.37972	0.888174			0.13152	-0.986122	1.6237			-0.0907306	-0.648425	1.87376			0.0401148	-0.39108	2.14015
0.00506889	-0.132583	2.35951			-0.141802	-0.295574	0.0272384			-0.0204845	-0.257757	0.0719186			-0.0906482	-0.324616	0.0253797			0.183271	-0.658036	0.095632			0.0962305	-0.881919	0.183263			-0.0384569	-1.38439	0.877464			0.144609	-1.00091	1.60958			-0.107203	-0.664462	1.861			0.036626	-0.406595	2.12803
0.00975635	-0.144991	2.34837			-0.130795	-0.292227	0.0273818			0.0121031	-0.256219	0.0722353			-0.0561851	-0.315297	0.0255322			0.18608	-0.649691	0.0945651			0.0913124	-0.872955	0.180503			-0.0634349	-1.38874	0.866167			0.128577	-1.01155	1.59635			-0.0968191	-0.681802	1.84646			0.042973	-0.418213	2.11082
-0.00358104	-0.159412	2.33458			-0.111044	-0.288608	0.0271989			0.0368735	-0.254138	0.0720131			-0.061684	-0.315478	0.0250001			0.208573	-0.647758	0.0935247			0.101101	-0.868601	0.177751			-0.0497004	-1.39395	0.856712			0.14328	-1.02826	1.5812			-0.109811	-0.697225	1.8303			0.0496723	-0.433584	2.09485
-0.00610723	-0.174839	2.31939			-0.10868	-0.287613	0.0281878			0.0100657	-0.250067	0.0724738			-0.056536	-0.315749	0.0250241			0.220065	-0.640203	0.0926528			0.0889822	-0.864844	0.175083			-0.0304326	-1.40187	0.846186			0.166948	-1.04777	1.5657			-0.130631	-0.716945	1.81706			0.0628166	-0.451191	2.07581
-0.0041944	-0.189391	2.30659			-0.0924475	-0.287703	0.0286581			-0.00528999	-0.247624	0.0740187			-0.0858895	-0.314573	0.0249261			0.224441	-0.638446	0.0915689			0.0811668	-0.855111	0.172247			-0.0238068	-1.41027	0.837088			0.154171	-1.06219	1.55199			-0.139732	-0.733211	1.80778			0.0623715	-0.463459	2.0582
-0.0148746	-0.200224	2.29335			-0.0971871	-0.287613	0.028834			-0.0203006	-0.244367	0.0749518			-0.0844561	-0.310773	0.024632			0.234311	-0.634493	0.090503			0.056034	-0.848794	0.169654			-0.0321202	-1.41664	0.827539			0.162058	-1.07535	1.53697			-0.149834	-0.748327	1.79208			0.0797308	-0.48186	2.04306
-0.0175219	-0.215126	2.27967			-0.121326	-0.282094	0.0303705			-0.00176828	-0.240748	0.0744189			-0.0730026	-0.305978	0.0247493			0.206495	-0.628255	0.0895426			0.0412687	-0.849306	0.16759			-0.0362845	-1.42068	0.817913			0.187007	-1.09301	1.52156			-0.1363	-0.763366	1.77825			0.0759962	-0.504086	2.0254
-0.0128714	-0.231188	2.26698			-0.138987	-0.277208	0.0311717			0.0257225	-0.238667	0.0738861			-0.0613053	-0.304259	0.0247864			0.189822	-0.62316	0.0888413			0.029237	-0.839829	0.164906			-0.00816322	-1.42697	0.808235			0.182435	-1.11253	1.50516			-0.144545	-0.777868	1.76484			0.0825932	-0.521044	2.00907
-0.0135452	-0.243093	2.25523			-0.141527	-0.276485	0.0312267			0.0171986	-0.236948	0.0731792			-0.0710644	-0.299374	0.0249277			0.170657	-0.61991	0.0874279			0.0557542	-0.832829	0.162629			-0.0113649	-1.43366	0.798552			0.175776	-1.12909	1.49192			-0.162904	-0.798815	1.75442			0.0883691	-0.534827	1.99461
-0.00707634	-0.256638	2.24008			-0.164111	-0.273228	0.0309916			0.0293197	-0.235591	0.0719616			-0.0915895	-0.297203	0.0253133			0.14888	-0.61622	0.0865053			0.0956404	-0.828048	0.16054			-0.000731284	-1.44213	0.788937			0.172038	-1.14262	1.47833			-0.144755	-0.815925	1.73869			0.091733	-0.552868	1.98123
-0.00681374	-0.26979	2.2267			-0.153366	-0.272051	0.0305575			0.0749556	-0.231068	0.0722271			-0.0953358	-0.297474	0.0258217			0.151291	-0.609807	0.0864603			0.10472	-0.824291	0.158681			-0.00760687	-1.4485	0.779372			0.175475	-1.15947	1.46565			-0.148114	-0.830657	1.72588			0.067464	-0.572279	1.96624
-0.00597536	-0.283598	2.21084			-0.160824	-0.268433	0.0305505			0.0648165	-0.227449	0.0711817			-0.0825889	-0.294127	0.0267115			0.187862	-0.604097	0.0865798			0.0999148	-0.815924	0.156576			-0.0162542	-1.45161	0.769779			0.159628	-1.17167	1.45174			-0.166625	-0.843625	1.71173			0.065791	-0.587578	1.94766
-0.00992856	-0.293774	2.19653			-0.168497	-0.261557	0.0301259			0.067698	-0.229439	0.0707572			-0.098724	-0.285984	0.0270763			0.194288	-0.600846	0.086279			0.0966999	-0.807301	0.155038			-0.0257889	-1.4534	0.760633			0.168141	-1.18468	1.43717			-0.171284	-0.862193	1.69981			0.0669104	-0.602876	1.92635
-0.00350464	-0.309267	2.18266			-0.165806	-0.257395	0.0291146			0.0451404	-0.227358	0.069428			-0.0921123	-0.285622	0.0273425			0.17919	-0.59742	0.0848965			0.119537	-0.802777	0.153249			-0.0190219	-1.4548	0.751167			0.140271	-1.19909	1.42461			-0.175428	-0.879304	1.68514			0.0817498	-0.620195	1.90671
-0.0156314	-0.324432	2.16779			-0.188706	-0.255766	0.0283723			0.0279589	-0.225458	0.0684093			-0.105658	-0.285894	0.027984			0.180176	-0.590041	0.0845116			0.140124	-0.795776	0.151745			-0.0395322	-1.4628	0.742444			0.136154	-1.21329	1.4109			-0.187312	-0.897028	1.67049			0.0704148	-0.633184	1.88747
-0.00654064	-0.336358	2.15125			-0.218734	-0.257033	0.0277895			0.0155468	-0.226092	0.0690946			-0.136332	-0.28128	0.02887			0.184523	-0.585297	0.0840789			0.152075	-0.786555	0.149537			-0.0425432	-1.46738	0.733657			0.148807	-1.224	1.39676			-0.184839	-0.914062	1.65528			0.0834862	-0.646534	1.86819
0.000569509	-0.347278	2.13759			-0.222059	-0.254771	0.0271918			0.026453	-0.221387	0.0681872			-0.138287	-0.280013	0.0294394			0.171496	-0.579762	0.08339			0.184717	-0.781177	0.147366			-0.0280071	-1.47026	0.724657			0.134111	-1.23273	1.38409			-0.149326	-0.929869	1.63979			0.102369	-0.667678	1.84978
-0.0158474	-0.363647	2.12573			-0.233528	-0.252057	0.0267904			0.0127468	-0.221206	0.0672259			-0.145082	-0.280646	0.0295325			0.158031	-0.573349	0.0820473			0.210687	-0.778189	0.145329			-0.0234676	-1.47181	0.716651			0.130512	-1.24722	1.36985			-0.140448	-0.945138	1.62361			0.0873293	-0.684997	1.82995
-0.0163722	-0.378374	2.111			-0.224392	-0.249795	0.0255766			-0.00851071	-0.218944	0.0675192			-0.149786	-0.27757	0.0291731			0.176149	-0.567024	0.0807519			0.233566	-0.76709	0.142967			-0.025219	-1.47632	0.707816			0.118315	-1.26267	1.35411			-0.121531	-0.964474	1.60732			0.0903982	-0.698996	1.81309
-0.00966281	-0.392861	2.0949			-0.226566	-0.248529	0.0253075			0.0250865	-0.217859	0.0668057			-0.123854	-0.272956	0.0293396			0.168175	-0.563598	0.0797074			0.216085	-0.763333	0.14089			-0.00426552	-1.47966	0.699682			0.119644	-1.2742	1.33917			-0.124262	-0.983579	1.5904			0.0939832	-0.716315	1.79424
0.000212872	-0.409798	2.07907			-0.198908	-0.24871	0.0249255			0.0330173	-0.216321	0.0672164			-0.14048	-0.273499	0.0290353			0.167422	-0.560699	0.0786521			0.233359	-0.759321	0.138828			-0.0160716	-1.48658	0.691682			0.0873296	-1.2895	1.32487			-0.113404	-0.999232	1.57564			0.0800945	-0.736376	1.77628
-8.19303e-05	-0.426014	2.06298			-0.195067	-0.248891	0.0235315			0.0444785	-0.209264	0.0671898			-0.117443	-0.272775	0.0278717			0.157982	-0.55534	0.0777019			0.2161	-0.754113	0.136746			-0.0212311	-1.49311	0.683083			0.0917564	-1.30473	1.31112			-0.107003	-1.01465	1.55948			0.0581871	-0.756149	1.75778
-0.00147495	-0.439625	2.04802			-0.194671	-0.247534	0.0226332			0.0258383	-0.209988	0.0666442			-0.128435	-0.270785	0.0270201			0.167703	-0.550948	0.0762766			0.189291	-0.746258	0.134758			-0.0167095	-1.49754	0.674771			0.0825639	-1.31663	1.29661			-0.113189	-1.03077	1.54364			0.0395081	-0.773323	1.74088
0.00122072	-0.454374	2.03305			-0.192118	-0.243281	0.0221547			0.0379292	-0.206278	0.0664549			-0.134195	-0.265899	0.0260664			0.147463	-0.546907	0.0752834			0.196842	-0.7431	0.132431			0.00838308	-1.49909	0.666506			0.0835169	-1.3303	1.28246			-0.13508	-1.04772	1.52732			0.0482827	-0.7949	1.72301
-0.00609024	-0.472778	2.01749			-0.165737	-0.238848	0.0213471			0.0186756	-0.205012	0.0657255			-0.1405	-0.26599	0.0251882			0.136996	-0.540757	0.0746303			0.212752	-0.739343	0.130036			0.0208275	-1.50259	0.65795			0.0746791	-1.34842	1.26954			-0.121795	-1.06438	1.51346			0.0272016	-0.81561	1.706
-0.00600794	-0.488577	2.00194			-0.153892	-0.236315	0.0203847			0.0240607	-0.204197	0.0650833			-0.170587	-0.2621	0.0240008			0.134682	-0.539791	0.0733871			0.194073	-0.732172	0.12784			0.00804642	-1.50849	0.64955			0.0570556	-1.36394	1.25457			-0.111164	-1.08118	1.49595			-0.0042105	-0.83228	1.68774
-0.00424573	-0.500941	1.98567			-0.156169	-0.238034	0.0193922			0.00721838	-0.202931	0.064074			-0.182154	-0.25839	0.0235344			0.1195	-0.537507	0.0723671			0.133146	-0.726366	0.126407			0.0155206	-1.51417	0.641504			0.0735931	-1.37407	1.24164			-0.115792	-1.09936	1.48022			-0.013677	-0.851114	1.66855
-0.0186045	-0.516347	1.96807			-0.138806	-0.234325	0.0186104			0.0335164	-0.197864	0.0640674			-0.181919	-0.260019	0.0225644			0.120777	-0.53083	0.0715182			0.113706	-0.723976	0.124603			0.0520187	-1.51533	0.633272			0.087654	-1.38597	1.22626			-0.0955438	-1.11256	1.46272			0.0235343	-0.872691	1.65113
-0.0202717	-0.531665	1.95018			-0.141193	-0.230977	0.0184072			0.0297603	-0.196055	0.064149			-0.194658	-0.256038	0.021942			0.136583	-0.525383	0.0702228			0.145441	-0.715267	0.122449			0.055564	-1.5144	0.625116			0.0840013	-1.39898	1.21134			-0.0977466	-1.12714	1.44674			0.0377424	-0.892607	1.63433
-0.0272037	-0.544904	1.93115			-0.151659	-0.226996	0.0181085			0.0260509	-0.197955	0.0648742			-0.194653	-0.250429	0.0212432			0.0988102	-0.520991	0.0687839			0.155577	-0.707498	0.120648			0.0446066	-1.51782	0.617176			0.0824759	-1.40955	1.1967			-0.0948142	-1.14325	1.42958			0.0282476	-0.909205	1.61954
-0.0187722	-0.560813	1.91236			-0.129178	-0.223558	0.0181855			0.0267887	-0.197412	0.0646649			-0.159979	-0.247262	0.0208295			0.105592	-0.516423	0.0672175			0.160341	-0.702546	0.119117			0.0643611	-1.51766	0.609083			0.0973097	-1.41894	1.18282			-0.0910667	-1.16075	1.41454			0.0430745	-0.923421	1.6021
-0.0192607	-0.577926	1.89432			-0.146433	-0.220482	0.0185246			0.0384045	-0.194517	0.0638711			-0.147896	-0.249886	0.0204961			0.0948959	-0.512733	0.0657751			0.159946	-0.696058	0.117557			0.0374426	-1.52155	0.601422			0.0954297	-1.43084	1.17004			-0.108387	-1.17801	1.39881			0.0423204	-0.943698	1.58514
-0.0428084	-0.593507	1.87824			-0.160617	-0.220754	0.019504			0.0426179	-0.194155	0.064759			-0.164378	-0.2488	0.0201364			0.0982027	-0.507286	0.0646079			0.124217	-0.688118	0.115778			0.0432915	-1.52326	0.594268			0.108462	-1.4403	1.1572			-0.113901	-1.19389	1.38436			0.057342	-0.959357	1.56827
-0.0369099	-0.605543	1.8611			-0.173698	-0.223197	0.0207557			0.0311818	-0.19325	0.0649553			-0.154557	-0.246629	0.0204877			0.090447	-0.503245	0.0637241			0.115235	-0.682825	0.113908			0.0510576	-1.52606	0.586777			0.130165	-1.4457	1.1443			-0.125895	-1.20663	1.36937			0.0560412	-0.977759	1.54995
-0.0281151	-0.622896	1.84276			-0.162449	-0.218673	0.0208941			0.050619	-0.19135	0.0645836			-0.160147	-0.245	0.020696			0.0862367	-0.495427	0.061938			0.125601	-0.680178	0.111961			0.0625075	-1.52349	0.580095			0.0915377	-1.45871	1.1304			-0.158237	-1.22282	1.35558			0.0499526	-0.999047	1.53244
-0.0258729	-0.642328	1.82477			-0.149023	-0.217497	0.0211599			0.0430986	-0.18936	0.0634438			-0.142888	-0.245272	0.0211767			0.0940748	-0.490683	0.0608437			0.12112	-0.671982	0.110274			0.0364744	-1.5238	0.573202			0.0812124	-1.47268	1.11717			-0.173412	-1.23824	1.34188			0.0505912	-1.01644	1.51517
-0.0290559	-0.659484	1.80659			-0.117618	-0.217859	0.0218973			0.0615384	-0.190084	0.0624964			-0.125845	-0.24102	0.0220535			0.0877949	-0.487696	0.0599236			0.114873	-0.666347	0.10835			0.0421363	-1.52924	0.56641			0.0585867	-1.48288	1.10363			-0.163319	-1.25781	1.3273			0.0536853	-1.03239	1.49794
-0.0411829	-0.676269	1.78795			-0.142121	-0.218944	0.0224862			0.0516431	-0.18737	0.0620876			-0.12322	-0.239301	0.0221036			0.109709	-0.485324	0.0590917			0.0907056	-0.663957	0.106461			0.0547583	-1.53274	0.559348			0.0715091	-1.495	1.09042			-0.155905	-1.27323	1.31501			0.0472566	-1.05201	1.48213
-0.0315132	-0.694541	1.77006			-0.146397	-0.216502	0.0219189			0.040481	-0.181941	0.0618042			-0.0892017	-0.242739	0.0224731			0.122429	-0.479262	0.057883			0.0787884	-0.659688	0.104985			0.0590656	-1.53352	0.551815			0.0857851	-1.50676	1.07761			-0.174318	-1.28436	1.30215			0.0665896	-1.07597	1.46506
-0.0271184	-0.711435	1.75252			-0.144676	-0.213064	0.0223092			0.0403446	-0.181941	0.0622144			-0.100776	-0.240296	0.0231426			0.126444	-0.477681	0.0572092			0.0694966	-0.652517	0.103452			0.0904462	-1.53686	0.545075			0.0731969	-1.52147	1.06468			-0.201344	-1.30147	1.28854			0.0854977	-1.09509	1.44893
-0.00850935	-0.727016	1.73437			-0.152395	-0.213426	0.0241326			0.018281	-0.179589	0.0618854			-0.105489	-0.234053	0.0234866			0.126284	-0.473113	0.0571284			0.0605389	-0.648675	0.102016			0.0891368	-1.53686	0.538409			0.049472	-1.5313	1.05227			-0.192409	-1.31513	1.27573			0.0656788	-1.11479	1.43154
-0.00886394	-0.746448	1.71746			-0.147124	-0.211164	0.0255933			0.0100042	-0.178142	0.0608702			-0.102809	-0.233148	0.0242392			0.14832	-0.471883	0.0566249			0.0714387	-0.647309	0.099949			0.102833	-1.5381	0.532978			0.0626338	-1.54527	1.04089			-0.189873	-1.32948	1.26372			0.0403785	-1.13615	1.41574
-0.00523604	-0.765114	1.70155			-0.143	-0.207726	0.0261724			0.00128956	-0.176875	0.0601972			-0.0750667	-0.232515	0.0243172			0.158311	-0.467754	0.0556594			0.0433664	-0.641333	0.0982556			0.111186	-1.54253	0.526152			0.0763892	-1.55762	1.02924			-0.181932	-1.34582	1.24989			0.0464941	-1.15593	1.39944
-0.00936648	-0.781067	1.68451			-0.117307	-0.210169	0.0272141			-0.0241494	-0.175427	0.0609254			-0.0457389	-0.229439	0.0239199			0.17815	-0.467139	0.0552681			0.0190677	-0.635698	0.0972676			0.11068	-1.54315	0.519572			0.0887119	-1.56671	1.01742			-0.177692	-1.35848	1.23646			0.0253737	-1.17527	1.38276
-0.00110058	-0.795138	1.66822			-0.107916	-0.207726	0.0282659			-0.00564639	-0.174704	0.0614227			-0.0346893	-0.226725	0.0240255			0.168277	-0.461429	0.0543987			0.0293895	-0.631856	0.0966894			0.0770845	-1.543	0.512852			0.0562772	-1.57358	1.00604			-0.189745	-1.36907	1.22296			0.0192966	-1.19605	1.36629
-0.00780375	-0.814001	1.65076			-0.067679	-0.199674	0.0288048			-0.0120046	-0.170813	0.0607293			-0.051651	-0.225096	0.0249817			0.190016	-0.454137	0.0545011			0.0518244	-0.624941	0.0957389			0.10519	-1.5374	0.506732			0.0472101	-1.58667	0.994489			-0.207869	-1.38265	1.20941			0.0163128	-1.21618	1.34959
-0.0130602	-0.831376	1.63295			-0.0570515	-0.19696	0.0284415			0.00943609	-0.173256	0.060355			-0.0387519	-0.22202	0.0258438			0.174822	-0.451414	0.0544996			0.0513198	-0.617342	0.0947165			0.0873818	-1.53795	0.500062			0.0474035	-1.59465	0.98243			-0.195972	-1.39646	1.19591			0.0198327	-1.23191	1.3341
-0.0192787	-0.846848	1.61621			-0.0261717	-0.196145	0.0294555			0.0198004	-0.172623	0.0603681			-0.0304915	-0.219035	0.0255077			0.195355	-0.447022	0.0540376			0.048417	-0.61239	0.0938259			0.092942	-1.53795	0.493132			0.0402131	-1.60108	0.97052			-0.196469	-1.41303	1.18335			0.0129006	-1.24743	1.31741
-0.00401677	-0.865317	1.59948			-0.0301129	-0.193612	0.0306202			-0.00748999	-0.17217	0.0614007			-0.0115236	-0.221659	0.0254744			0.191566	-0.44667	0.0536377			0.0573543	-0.609232	0.094412			0.0994943	-1.53771	0.486469			0.0435848	-1.60803	0.960055			-0.188381	-1.42385	1.17109			0.00636268	-1.26684	1.30115
-0.002933	-0.882933	1.58264			-0.0350862	-0.194607	0.0311203			-0.0267973	-0.169366	0.0620093			-0.043521	-0.22202	0.0254269			0.157683	-0.437534	0.0531786			0.0565625	-0.601975	0.0938669			0.0828841	-1.53771	0.480228			0.0457791	-1.61668	0.949252			-0.163629	-1.43697	1.15956			0.0224469	-1.28524	1.28474
0.00323593	-0.899192	1.56587			0.00555875	-0.197322	0.0310768			0.0177598	-0.16819	0.0612305			-0.0357419	-0.219487	0.0259609			0.152038	-0.434723	0.0529961			0.0730493	-0.596255	0.0923899			0.0848522	-1.53647	0.474005			0.0666837	-1.6223	0.939914			-0.185811	-1.45148	1.14687			0.0236119	-1.30213	1.26914
0.00480853	-0.91672	1.54857			0.00338529	-0.19325	0.0309847			0.00879446	-0.167466	0.0600466			-0.021805	-0.214964	0.0258733			0.156509	-0.430067	0.0523801			0.0292913	-0.592583	0.0908689			0.0830817	-1.53064	0.467566			0.0698528	-1.63124	0.928799			-0.200513	-1.46183	1.13269			0.0210056	-1.32132	1.25404
-0.0190382	-0.937969	1.53224			0.0128982	-0.188546	0.0305763			-5.95719e-05	-0.166742	0.0599523			-0.0582304	-0.214964	0.0256471			0.163025	-0.426553	0.0515466			0.0534761	-0.587376	0.0894533			0.0810678	-1.52963	0.461418			0.0644655	-1.64373	0.918314			-0.186874	-1.4748	1.12067			0.0347522	-1.33871	1.23778
-0.0152465	-0.95867	1.51587			-0.0234949	-0.190898	0.0297667			-0.00339863	-0.163485	0.0594094			-0.0626227	-0.213878	0.0255724			0.201699	-0.423039	0.0507628			0.0356094	-0.582936	0.0885572			0.0658141	-1.53305	0.45517			0.052079	-1.65253	0.907152			-0.169999	-1.48784	1.10779			0.0453105	-1.35567	1.22223
-0.0219047	-0.97598	1.49958			-0.0564246	-0.193431	0.0287133			-0.0399753	-0.163214	0.0596406			-0.0579264	-0.212159	0.0249182			0.211551	-0.420491	0.0502655			0.0652534	-0.579436	0.0868111			0.0671985	-1.53336	0.449226			0.0372597	-1.66044	0.895782			-0.145869	-1.5025	1.09436			0.0721814	-1.37544	1.20646
-0.0291712	-0.995325	1.48354			-0.084081	-0.191712	0.0279269			-0.038649	-0.160409	0.0597166			-0.0441	-0.214059	0.0247529			0.210635	-0.419964	0.0495171			0.0639991	-0.576618	0.0853211			0.0698256	-1.53352	0.44419			0.0102589	-1.66709	0.885702			-0.141815	-1.51102	1.08269			0.0722358	-1.39731	1.19076
-0.0286901	-1.01504	1.46713			-0.0893875	-0.188455	0.0271938			-0.0388062	-0.158781	0.0601668			-0.0257352	-0.21243	0.0249042			0.223451	-0.414254	0.0482508			0.0551825	-0.571667	0.0839091			0.0620736	-1.5294	0.43886			-0.000192373	-1.6807	0.876507			-0.121963	-1.5223	1.06988			0.076724	-1.41845	1.17583
-0.0167664	-1.03439	1.4508			-0.0608084	-0.187189	0.026303			-0.0223604	-0.158238	0.0603775			-0.0431171	-0.207997	0.0244365			0.220437	-0.410828	0.0474443			0.0683348	-0.568764	0.0823866			0.0884426	-1.52831	0.434147			-0.00799022	-1.68971	0.866602			-0.109038	-1.53542	1.05644			0.0765374	-1.43433	1.16061
-0.000359054	-1.05264	1.43606			-0.0615395	-0.185379	0.0256552			-0.0234148	-0.157152	0.0597787			-0.0824436	-0.204378	0.024192			0.249026	-0.410828	0.0467995			0.0684995	-0.564837	0.0813822			0.100224	-1.52637	0.429561			-0.00944533	-1.69711	0.857361			-0.102167	-1.54823	1.0439			0.070071	-1.4536	1.14594
-0.00137516	-1.0724	1.42089			-0.026589	-0.182484	0.0246889			-0.0351117	-0.154166	0.0590837			-0.0560356	-0.204378	0.0242031			0.252967	-0.407314	0.0463228			0.0503004	-0.56219	0.0804129			0.0807528	-1.52808	0.425115			-0.00343784	-1.70679	0.846952			-0.111753	-1.55659	1.03249			0.0819765	-1.47409	1.13189
-0.0137899	-1.09098	1.40549			-0.025815	-0.18366	0.0239435			-0.0225724	-0.153533	0.0591391			-0.0292607	-0.204107	0.0244283			0.243214	-0.402658	0.0458081			0.0670108	-0.556982	0.0795686			0.0460697	-1.52676	0.420418			-0.0201541	-1.71293	0.837094			-0.124232	-1.56887	1.02053			0.0760585	-1.4909	1.11831
-0.0256768	-1.1045	1.39045			-0.0433502	-0.181218	0.0231337			-0.0294925	-0.152267	0.0597222			-0.0249015	-0.199402	0.0238228			0.221286	-0.400286	0.046116			0.0646417	-0.552799	0.0790353			0.0242866	-1.52209	0.416044			0.0191715	-1.7167	0.827131			-0.116256	-1.57739	1.00823			0.0539549	-1.50945	1.10505
-0.0335501	-1.12338	1.37538			-0.023991	-0.17597	0.0228393			-0.053391	-0.1529	0.0594661			-0.0206739	-0.196055	0.0230706			0.198806	-0.396508	0.0456054			0.0836512	-0.546054	0.0775583			0.0407119	-1.51479	0.412314			-0.00369297	-1.7252	0.816834			-0.11735	-1.58844	0.996203			0.0452441	-1.52569	1.09161
-0.0487401	-1.14402	1.35945			-0.0112811	-0.17217	0.0226793			-0.0677267	-0.153171	0.0597562			-0.0117885	-0.197141	0.0230234			0.193699	-0.391237	0.0449382			0.0588519	-0.542127	0.0767835			0.0168066	-1.51176	0.407697			-0.000974508	-1.73148	0.807586			-0.110179	-1.59956	0.983759			0.0529005	-1.5412	1.07878
-0.0431788	-1.16122	1.34381			-0.0286109	-0.171808	0.0223345			-0.0638164	-0.151362	0.0592412			-0.0159856	-0.193431	0.0225466			0.196903	-0.389217	0.0448999			0.0583329	-0.537004	0.0763236			0.0119682	-1.50756	0.403454			0.0108582	-1.73414	0.797624			-0.134334	-1.61092	0.971424			0.0451265	-1.55181	1.06684
-0.0301786	-1.17803	1.32804			0.00145241	-0.173256	0.0220585			-0.0513838	-0.152267	0.0596753			-0.0188953	-0.192798	0.0216885			0.19422	-0.38746	0.0447984			0.0385115	-0.53137	0.0753056			0.00314412	-1.50671	0.399061			0.0139637	-1.73606	0.788159			-0.143128	-1.6199	0.960106			0.037326	-1.56942	1.05426
-0.0217662	-1.19737	1.31243			0.0110666	-0.169909	0.0223254			-0.0608802	-0.149371	0.0594073			0.00201334	-0.193341	0.0209283			0.193144	-0.378499	0.04461			0.0482275	-0.529491	0.074926			-0.00424395	-1.50057	0.394705			-0.0103503	-1.74116	0.777825			-0.147424	-1.62956	0.947928			0.0747044	-1.58904	1.0423
-0.022479	-1.21523	1.29746			-0.0104787	-0.172713	0.0218758			-0.0900252	-0.148648	0.0591166			-0.00258684	-0.193069	0.0200297			0.187208	-0.374809	0.0440768			0.051848	-0.525308	0.0739565			-0.0104791	-1.49606	0.3899			-0.0219335	-1.74516	0.769053			-0.150619	-1.63831	0.935781			0.0641344	-1.60218	1.0302
-0.0306722	-1.23182	1.28224			-0.0112175	-0.169637	0.0211848			-0.0498562	-0.150909	0.0593018			-0.00388695	-0.186103	0.0194498			0.179096	-0.371559	0.0437934			0.0633657	-0.518905	0.0744577			-0.0326209	-1.49116	0.385255			-0.0226476	-1.74796	0.759985			-0.130593	-1.64783	0.924093			0.0564674	-1.61553	1.01897
-0.0400149	-1.25328	1.26762			-0.0270038	-0.166561	0.0207228			-0.107322	-0.148286	0.0614505			0.00648851	-0.186013	0.0184249			0.200026	-0.367693	0.0437669			0.0740118	-0.51677	0.0740863			-0.0374422	-1.48518	0.381093			-0.0126908	-1.75536	0.750789			-0.118281	-1.65711	0.912635			0.0442763	-1.63169	1.00788
-0.0451514	-1.27401	1.25329			-0.0528634	-0.168461	0.0207834			-0.0988269	-0.148829	0.0625979			0.0258463	-0.188727	0.0174557			0.183808	-0.365761	0.0435242			0.0615734	-0.515319	0.0736944			-0.0380252	-1.48635	0.377419			-0.00834646	-1.76245	0.741485			-0.104092	-1.66693	0.901491			0.0270019	-1.64815	0.996483
-0.0290265	-1.29167	1.23913			-0.0421112	-0.171356	0.0200359			-0.155607	-0.143672	0.06256			0.0230349	-0.18746	0.0166634			0.160819	-0.363652	0.0430283			0.0592718	-0.50866	0.0733797			-0.016183	-1.48464	0.373464			0.00584905	-1.76704	0.732205			-0.140176	-1.67414	0.890885			0.0575491	-1.66424	0.986077
-0.00572476	-1.30806	1.2253			-0.0591354	-0.168551	0.0190678			-0.130452	-0.143491	0.0621881			0.0261266	-0.184656	0.015621			0.129118	-0.364004	0.0426981			0.0745592	-0.506611	0.0737675			-0.0145097	-1.48114	0.368573			-0.0153358	-1.76896	0.723506			-0.137698	-1.68205	0.881021			0.0391244	-1.68026	0.974881
-0.0159937	-1.32823	1.21103			-0.0564899	-0.16629	0.0188294			-0.113254	-0.141772	0.0620982			0.0335811	-0.184475	0.01487			0.119403	-0.359523	0.0422577			0.091041	-0.505074	0.0734996			-0.0269844	-1.47415	0.364411			0.00285807	-1.77532	0.714063			-0.131192	-1.68995	0.871233			0.0439006	-1.69967	0.964167
-0.00475059	-1.3474	1.19688			-0.0471597	-0.162399	0.019753			-0.0890109	-0.1415	0.0643374			0.0349976	-0.181579	0.0141368			0.118582	-0.357591	0.0418529			0.0763508	-0.49961	0.0723872			-0.0444112	-1.47143	0.360363			0.00562133	-1.78389	0.705359			-0.106103	-1.69578	0.861822			0.0621667	-1.71237	0.953197
0.000376341	-1.36471	1.18324			-0.0382543	-0.16258	0.0192982			-0.0782729	-0.141681	0.0673066			0.0271307	-0.176151	0.0139667			0.110948	-0.355043	0.0415694			0.110735	-0.496793	0.0720028			-0.0297192	-1.46762	0.355979			-0.0148036	-1.7881	0.696658			-0.093309	-1.70798	0.852697			0.0711527	-1.7237	0.941465
0.0109865	-1.38126	1.1688			-0.0237456	-0.159685	0.0185311			-0.0732279	-0.138877	0.0687128			0.0427575	-0.178051	0.0137326			0.108957	-0.354428	0.0406226			0.126184	-0.496622	0.0715933			-0.0320562	-1.46451	0.352491			-0.0378139	-1.78995	0.688038			-0.102088	-1.71305	0.843467			0.0735603	-1.7421	0.930004
-0.000237026	-1.39962	1.15459			-0.00710101	-0.160861	0.0179198			-0.0938032	-0.136705	0.0694354			0.0327866	-0.179227	0.0136377			0.104367	-0.349157	0.0402722			0.142171	-0.491243	0.0715221			-0.0382111	-1.46078	0.348217			-0.048425	-1.79298	0.679953			-0.0835817	-1.71665	0.834765			0.0570922	-1.75552	0.91882
0.00369456	-1.41338	1.14083			-0.0053335	-0.157966	0.0171698			-0.107637	-0.137248	0.0711212			0.0365295	-0.174161	0.0134462			0.0822893	-0.346082	0.040163			0.13282	-0.485438	0.070336			-0.021341	-1.4527	0.344006			-0.0307034	-1.79461	0.671992			-0.103811	-1.72409	0.825553			0.0504364	-1.76671	0.908121
0.00795089	-1.42874	1.12673			-0.0503027	-0.152628	0.0169209			-0.0985981	-0.140234	0.0717878			0.0261727	-0.166833	0.0134479			0.0775805	-0.343359	0.0399656			0.118558	-0.480571	0.0692373			-0.0291544	-1.44469	0.340276			-0.0471441	-1.7955	0.663505			-0.0845623	-1.73054	0.81666			0.0492829	-1.77883	0.89724
0.0109964	-1.44782	1.11364			-0.0436746	-0.14901	0.016863			-0.103184	-0.140596	0.0716679			0.0266773	-0.168823	0.0131672			0.0676818	-0.340811	0.0398777			0.0951471	-0.47801	0.0685607			-0.0141876	-1.43731	0.336398			-0.0377031	-1.79513	0.656851			-0.0645055	-1.73852	0.808657			0.067667	-1.7903	0.887136
0.0130516	-1.46476	1.10019			-0.0484793	-0.151362	0.0162418			-0.0748195	-0.13761	0.0711868			0.0205354	-0.167375	0.0131744			0.0681777	-0.338	0.0393721			0.105836	-0.47229	0.0681103			-0.0111463	-1.43381	0.33238			-0.0046576	-1.79838	0.649159			-0.0457455	-1.74351	0.800703			0.0509026	-1.79788	0.877943
0.0124479	-1.47658	1.08664			-0.0275894	-0.151543	0.0157545			-0.0769982	-0.13761	0.0716503			0.00829263	-0.165294	0.0127904			0.0695672	-0.334574	0.038637			0.0967907	-0.467936	0.0669873			-0.0193517	-1.42946	0.327811			-0.0185198	-1.79321	0.641816			-0.0782317	-1.75172	0.792787			0.0458632	-1.80618	0.868037
0.0138687	-1.49236	1.07352			-0.0126728	-0.147833	0.0159595			-0.0623943	-0.137429	0.0714444			0.0162775	-0.165566	0.0121707			0.0527953	-0.329567	0.0378934			0.079989	-0.467424	0.0661254			-0.0377355	-1.41967	0.323861			-0.0229986	-1.79195	0.634831			-0.0938122	-1.75479	0.784446			0.0437812	-1.81989	0.857578
-0.00439431	-1.50903	1.06048			-0.0129982	-0.146929	0.0168786			-0.0766955	-0.13571	0.0704106			0.0505705	-0.165747	0.0121868			0.0902895	-0.32289	0.03743			0.0609913	-0.462301	0.0653698			-0.034269	-1.41213	0.32008			-0.0194094	-1.79424	0.627395			-0.109068	-1.75793	0.776113			0.0563828	-1.83144	0.847805
-0.0135218	-1.52496	1.04753			0.000192894	-0.14521	0.0176346			-0.0789282	-0.135982	0.0697063			0.0256774	-0.160138	0.0120309			0.11907	-0.321836	0.0374198			0.0750186	-0.457776	0.064451			-0.0130041	-1.4056	0.316125			-0.0341608	-1.79661	0.620873			-0.104161	-1.76683	0.768448			0.0554634	-1.83699	0.838135
-0.0351238	-1.54186	1.03477			-0.0119516	-0.145753	0.0174431			-0.0619068	-0.136253	0.0690362			0.0387663	-0.161585	0.0119229			0.084964	-0.321133	0.0368446			0.0648265	-0.454191	0.0635081			-0.0252322	-1.40117	0.312507			-0.0291081	-1.79572	0.613654			-0.102459	-1.77274	0.759998			0.0512912	-1.84659	0.829046
-0.044766	-1.55831	1.02196			-0.00610886	-0.145119	0.0175735			-0.0395373	-0.133267	0.0685372			0.0115492	-0.16258	0.0116982			0.0819463	-0.319288	0.0374039			0.0777132	-0.456496	0.0627495			0.00586907	-1.39635	0.308603			-0.0165474	-1.79868	0.60636			-0.107719	-1.77627	0.751995			0.0849856	-1.85807	0.819926
-0.0575009	-1.57389	1.00933			-0.0146232	-0.145843	0.0180729			-0.0245494	-0.13001	0.0673317			-0.00382506	-0.163937	0.0114201			0.0822651	-0.31595	0.0382086			0.096706	-0.449068	0.0620259			-0.0140218	-1.39356	0.305239			-0.00792803	-1.80163	0.598642			-0.108068	-1.77765	0.743226			0.0841421	-1.86781	0.810204
-0.0647734	-1.58597	0.997361			-0.0177042	-0.145662	0.0181243			-0.0503624	-0.13001	0.0661232			-0.0125995	-0.158781	0.0115688			0.0463665	-0.316741	0.0388034			0.0970284	-0.445056	0.0612455			-0.00746731	-1.38819	0.301415			-0.0244624	-1.79905	0.591295			-0.098524	-1.78295	0.734882			0.104865	-1.87784	0.800709
-0.0670997	-1.60122	0.985343			-0.0397415	-0.141229	0.0177625			-0.0508374	-0.130644	0.0650614			-0.0363217	-0.155976	0.0118267			0.0361058	-0.313666	0.0386453			0.0828468	-0.445824	0.0599648			-0.0369423	-1.37871	0.297128			-0.0345455	-1.8003	0.584072			-0.0935518	-1.7864	0.727066			0.113751	-1.88924	0.791785
-0.0640931	-1.61827	0.973168			-0.0359472	-0.13951	0.0172002			-0.0743162	-0.12793	0.0649103			-0.0286318	-0.157152	0.0119803			0.0421674	-0.310855	0.0392323			0.0826126	-0.441384	0.0589978			-0.0412458	-1.37335	0.293502			-0.041412	-1.80525	0.577085			-0.0700435	-1.7887	0.718095			0.152705	-1.89754	0.782539
-0.0563987	-1.63149	0.961255			-0.03691	-0.13562	0.0167291			-0.0723315	-0.129558	0.0643433			-0.0445881	-0.151362	0.0123213			0.0192129	-0.311997	0.0401967			0.088502	-0.437372	0.0588809			-0.0513322	-1.36962	0.289721			-0.0403069	-1.80636	0.569935			-0.0679791	-1.79446	0.709735			0.134576	-1.90208	0.772404
-0.0441121	-1.64243	0.949366			-0.042957	-0.13942	0.0170562			-0.0760854	-0.127206	0.0633557			-0.0547091	-0.150457	0.0123641			0.00531572	-0.308834	0.0411087			0.102479	-0.435835	0.0581778			-0.0390082	-1.36302	0.286127			-0.0171973	-1.80185	0.563757			-0.0772693	-1.7953	0.700999			0.120368	-1.91183	0.762411
-0.03816	-1.65431	0.938211			-0.0326367	-0.134715	0.016964			-0.0462818	-0.125668	0.0625742			-0.0416177	-0.152538	0.0126202			0.0158834	-0.307956	0.0409132			0.10426	-0.433701	0.0568214			-0.0477961	-1.3561	0.28239			0.0178016	-1.80008	0.556617			-0.086575	-1.79614	0.692042			0.104181	-1.91998	0.752675
-0.0424044	-1.66635	0.92663			-0.0411305	-0.131458	0.0171074			-0.0359201	-0.125577	0.0626874			-0.0129371	-0.14711	0.0129357			-7.1581e-05	-0.301543	0.0413509			0.0931216	-0.426444	0.0562196			-0.054485	-1.34685	0.27985			0.00858141	-1.79816	0.549922			-0.0817513	-1.79845	0.68383			0.106794	-1.92344	0.742687
-0.0297501	-1.67639	0.915495			-0.0345392	-0.128834	0.0170071			-0.0134103	-0.129106	0.0644094			0.00504049	-0.14331	0.0129378			0.0152116	-0.299522	0.0418318			0.0937798	-0.42209	0.0557396			-0.0318416	-1.33916	0.277608			-0.00317396	-1.79417	0.543455			-0.0991214	-1.80297	0.675024			0.117504	-1.92777	0.732867
-0.0120982	-1.68856	0.904286			-0.0139768	-0.125849	0.0168344			-0.0138038	-0.128111	0.064598			-0.00338074	-0.141772	0.0124776			0.026856	-0.298468	0.04171			0.107473	-0.420809	0.0553667			-0.0144536	-1.3289	0.275418			-0.0266441	-1.78988	0.536677			-0.0928975	-1.80451	0.666506			0.130052	-1.93196	0.723294
-0.0131179	-1.70121	0.893147			-0.0240922	-0.125125	0.0163923			0.00704149	-0.127296	0.0643289			-0.0249009	-0.143672	0.0122865			0.0232105	-0.293812	0.0408403			0.145988	-0.415687	0.054195			-0.0235465	-1.32299	0.272878			-0.0450279	-1.78774	0.53036			-0.0695939	-1.80558	0.658722			0.147433	-1.93456	0.714857
-0.0152828	-1.7099	0.882005			-0.0301441	-0.125668	0.015804			0.00701163	-0.127025	0.0642045			-0.0287036	-0.141591	0.0123908			0.0448024	-0.289683	0.040599			0.140962	-0.4086	0.0535086			-0.0422761	-1.3181	0.269594			-0.0494929	-1.78019	0.524802			-0.0491991	-1.80942	0.650777			0.14526	-1.93643	0.706013
-0.0223328	-1.71863	0.871138			-0.00369072	-0.127025	0.01516			0.00289003	-0.127025	0.0655385			-0.0458169	-0.1415	0.0118522			0.0527803	-0.289332	0.0411432			0.118074	-0.409027	0.053759			-0.0535436	-1.30776	0.265957			-0.0460793	-1.77214	0.518828			-0.0749629	-1.8085	0.643066			0.147424	-1.94242	0.696769
-0.0165205	-1.72966	0.860429			0.0239782	-0.123225	0.0147122			0.00283445	-0.126211	0.0655272			-0.0477382	-0.141681	0.0117856			0.0470884	-0.282567	0.0410825			0.109387	-0.40732	0.0541282			-0.0573092	-1.29781	0.262811			-0.0451055	-1.7711	0.513134			-0.0795823	-1.80781	0.635116			0.167668	-1.94733	0.688104
-0.00495337	-1.7411	0.850031			0.0497591	-0.120782	0.014278			0.0280287	-0.125306	0.0661822			-0.0477825	-0.136977	0.0117905			0.0268469	-0.281689	0.0398203			0.0871824	-0.400661	0.0539781			-0.0505486	-1.28795	0.259446			-0.0370778	-1.77243	0.506615			-0.0977652	-1.81103	0.627719			0.15582	-1.94711	0.679336
-0.0109923	-1.75045	0.83998			0.0498936	-0.12422	0.0144162			0.0173145	-0.124401	0.0654868			-0.0631917	-0.135529	0.0126572			0.0103058	-0.279844	0.0396457			0.0738518	-0.398441	0.0535307			-0.0416169	-1.28523	0.255538			-0.0286452	-1.768	0.500603			-0.0988927	-1.81417	0.619984			0.148	-1.94863	0.670568
-0.00360272	-1.76136	0.830096			0.042305	-0.123949	0.0140513			0.00959003	-0.122049	0.0664083			-0.0839691	-0.137339	0.0129442			0.0145885	-0.280107	0.0403136			0.0855333	-0.398953	0.0534353			-0.0592599	-1.27916	0.251776			-0.0459946	-1.76275	0.495547			-0.0820631	-1.81134	0.612534			0.166328	-1.95512	0.661895
-0.00254279	-1.77067	0.820391			0.0016086	-0.12232	0.01375			0.0118449	-0.11843	0.0663301			-0.0704368	-0.136615	0.0118689			0.0198677	-0.276242	0.0400925			0.0981627	-0.396306	0.0536275			-0.0856375	-1.27271	0.248091			-0.0429399	-1.76349	0.490465			-0.094649	-1.81157	0.605824			0.162749	-1.9588	0.653846
-0.00147738	-1.77859	0.810492			0.00921327	-0.121868	0.0137945			0.0414829	-0.119244	0.0652096			-0.0400084	-0.134534	0.0111234			0.0624944	-0.272025	0.0395906			0.0728917	-0.390245	0.0542106			-0.0689079	-1.26587	0.244737			-0.0215642	-1.75817	0.485539			-0.139559	-1.81126	0.598388			0.159954	-1.96234	0.64566
-0.00537442	-1.78646	0.800516			0.0149476	-0.118611	0.013796			0.0377823	-0.120059	0.0637645			-0.0315007	-0.13001	0.0102239			0.084498	-0.274397	0.0386465			0.0484447	-0.39033	0.054267			-0.0634624	-1.25562	0.241036			0.00888329	-1.75373	0.479734			-0.139971	-1.80957	0.591636			0.1551	-1.96378	0.637256
0.000395314	-1.79664	0.790491			0.0108044	-0.116349	0.0137528			0.0422351	-0.118249	0.062132			-0.0431743	-0.131548	0.00926803			0.0923576	-0.271586	0.0385901			0.0327535	-0.388708	0.0542352			-0.0494622	-1.25103	0.237306			0.0312558	-1.75654	0.475172			-0.142146	-1.81088	0.584453			0.151168	-1.96667	0.629502
0.00170439	-1.80496	0.780586			0.0203796	-0.114811	0.0131567			0.0650096	-0.117163	0.0615835			-0.0371754	-0.131187	0.00830796			0.0816756	-0.271147	0.0382308			0.0180589	-0.38239	0.0538291			-0.0682678	-1.24505	0.233309			0.0166951	-1.75447	0.470582			-0.117641	-1.81095	0.576914			0.165577	-1.9671	0.621604
0.00916042	-1.80872	0.770852			0.0383295	-0.115987	0.0130324			0.0619432	-0.118159	0.0624267			-0.049705	-0.126753	0.00711741			0.0680522	-0.269214	0.037255			0.0122176	-0.380854	0.0542168			-0.0713199	-1.23852	0.229384			-0.00557077	-1.74486	0.465415			-0.105555	-1.80865	0.569327			0.13725	-1.96905	0.615166
0.0164865	-1.81259	0.761567			0.0687194	-0.113454	0.0121958			0.0900323	-0.116168	0.063001			-0.0413857	-0.12603	0.00610041			0.0847384	-0.264119	0.0356829			0.0283807	-0.379317	0.0545737			-0.0675689	-1.22826	0.226071			-0.0058573	-1.73769	0.461234			-0.108616	-1.80313	0.562129			0.124979	-1.96927	0.607474
0.0335826	-1.81951	0.752254			0.0690816	-0.108297	0.0117378			0.0641086	-0.114902	0.0614566			-0.00599048	-0.126211	0.00564098			0.0446104	-0.263679	0.0338595			0.0650366	-0.374194	0.0541349			-0.0777926	-1.21567	0.223608			0.00666695	-1.73444	0.455625			-0.109871	-1.80144	0.555173			0.115447	-1.97057	0.600231
0.0179696	-1.82476	0.743437			0.0643432	-0.107031	0.0116641			0.0836	-0.117887	0.0612757			0.0135225	-0.12223	0.00541263			0.0305477	-0.260517	0.0323121			0.0806167	-0.36745	0.0546673			-0.0916037	-1.20798	0.220507			-0.00777741	-1.72594	0.450123			-0.126237	-1.80267	0.548148			0.115642	-1.96458	0.594276
0.0235613	-1.82806	0.734819			0.0615169	-0.106397	0.0115247			0.071346	-0.118159	0.0611516			0.0188171	-0.119697	0.00472233			0.0506989	-0.259638	0.0309273			0.0925784	-0.364974	0.0541829			-0.0869373	-1.19927	0.217097			0.0115842	-1.7181	0.444809			-0.112865	-1.80182	0.540971			0.132216	-1.96054	0.587727
0.027739	-1.83371	0.726022			0.0527029	-0.105402	0.0112198			0.100785	-0.115354	0.0605151			0.0170196	-0.122592	0.00425196			0.0680504	-0.256037	0.0297446			0.10308	-0.364803	0.0529262			-0.0739058	-1.19127	0.214503			0.00528043	-1.71256	0.439311			-0.150346	-1.79752	0.53431			0.102579	-1.96003	0.580666
0.0153361	-1.83706	0.717438			0.0497122	-0.106397	0.0107553			0.0739559	-0.11454	0.0594434			0.00875831	-0.122954	0.0045327			0.0792634	-0.252171	0.0283295			0.10274	-0.358741	0.0525633			-0.0526128	-1.18443	0.211928			0.0233444	-1.70206	0.433938			-0.18114	-1.79591	0.527674			0.122272	-1.95888	0.573904
0.0206618	-1.83822	0.708538			0.0643636	-0.106578	0.010462			0.068848	-0.114268	0.0585973			0.0572748	-0.118249	0.00479994			0.0946107	-0.248745	0.0273488			0.1145	-0.354814	0.0520739			-0.0435229	-1.17417	0.209148			0.0316574	-1.69156	0.428578			-0.159687	-1.79231	0.520749			0.126877	-1.95469	0.567511
0.00797332	-1.84343	0.699805			0.0320411	-0.104497	0.00996687			0.0485154	-0.116259	0.0587048			0.081484	-0.116982	0.00402309			0.114191	-0.245495	0.0263088			0.086039	-0.353021	0.0510371			-0.0345458	-1.16259	0.206203			0.0328642	-1.68757	0.422876			-0.15533	-1.78839	0.513918			0.148732	-1.95036	0.560337
-0.00433339	-1.84969	0.690952			0.016644	-0.10314	0.00958913			0.049669	-0.112097	0.0591159			0.0853939	-0.118701	0.00355189			0.105187	-0.243562	0.0257174			0.0811019	-0.350716	0.0502042			-0.0502869	-1.15537	0.203291			0.0395448	-1.6855	0.417687			-0.156004	-1.78816	0.507239			0.157135	-1.94942	0.553172
-0.0126959	-1.85367	0.682155			0.0365706	-0.104226	0.00910188			0.0616184	-0.111826	0.0579774			0.0854718	-0.117706	0.00402264			0.124786	-0.241278	0.0250935			0.0858442	-0.347216	0.0499323			-0.0556847	-1.15101	0.200514			0.0343447	-1.67907	0.412911			-0.144163	-1.78494	0.500902			0.146403	-1.94336	0.546455
-0.00104558	-1.85461	0.673368			0.0255956	-0.107573	0.0087484			0.0783609	-0.108569	0.0573208			0.0938106	-0.116621	0.00463729			0.139193	-0.242332	0.0244152			0.0855729	-0.346704	0.049486			-0.0415822	-1.14239	0.198201			0.0476944	-1.66976	0.407345			-0.14694	-1.77988	0.495102			0.134204	-1.94069	0.539199
-0.00341655	-1.85839	0.664697			0.00309765	-0.103502	0.00858663			0.0545899	-0.107121	0.0607232			0.0827423	-0.11843	0.004473			0.121781	-0.23794	0.0237039			0.102209	-0.34585	0.0488283			-0.0479503	-1.13501	0.195502			0.0488282	-1.66695	0.402136			-0.134163	-1.77497	0.489422			0.126467	-1.94271	0.532805
-0.0113422	-1.86196	0.655944			0.0477467	-0.103321	0.00805523			0.0470974	-0.107392	0.0622893			0.0647851	-0.11644	0.00465633			0.12243	-0.235743	0.0229348			0.100277	-0.34252	0.0478626			-0.0639228	-1.12762	0.192486			0.0442068	-1.66229	0.397483			-0.144137	-1.76967	0.483594			0.103675	-1.94026	0.526056
-0.0153969	-1.86236	0.64727			0.0539289	-0.100969	0.00769823			0.0317448	-0.105312	0.063542			0.0794036	-0.113454	0.00472319			0.0994528	-0.233635	0.0225813			0.0930503	-0.339447	0.0467732			-0.0611259	-1.11861	0.18937			0.0410307	-1.65638	0.392222			-0.129496	-1.76507	0.477991			0.116395	-1.93492	0.518822
-0.0162261	-1.86468	0.638674			0.0676784	-0.0988881	0.00826722			0.0242273	-0.106578	0.0636422			0.085038	-0.110468	0.00477019			0.118298	-0.235655	0.0224905			0.0969156	-0.338081	0.0461474			-0.0529913	-1.11115	0.186491			0.00950376	-1.6512	0.386831			-0.142606	-1.76223	0.472618			0.130681	-1.92987	0.511653
-0.0111807	-1.86743	0.630186			0.0773964	-0.0972596	0.00905252			0.00190064	-0.105221	0.0652732			0.0702181	-0.112459	0.00463981			0.120789	-0.232493	0.022198			0.102044	-0.335519	0.044842			-0.0527179	-1.10656	0.183335			-0.00384033	-1.64721	0.381359			-0.128049	-1.75832	0.466451			0.118061	-1.92914	0.504827
-0.0244821	-1.8657	0.621726			0.0688484	-0.0982548	0.00948149			0.0203118	-0.102416	0.0664993			0.0704072	-0.11273	0.00398415			0.117777	-0.230648	0.0217039			0.106235	-0.332019	0.0436404			-0.087401	-1.09864	0.180845			-0.00200324	-1.63619	0.37643			-0.13286	-1.75087	0.461239			0.117361	-1.92287	0.498003
-0.0181202	-1.86236	0.613324			0.0999403	-0.0967167	0.0100278			0.0540141	-0.102597	0.0659587			0.0763851	-0.105402	0.00453067			0.108128	-0.22854	0.0215131			0.118534	-0.328177	0.0428242			-0.100894	-1.08698	0.178222			0.0125551	-1.62688	0.371723			-0.127658	-1.74374	0.455796			0.105645	-1.91818	0.490908
-0.0149937	-1.86325	0.604916			0.108486	-0.0907456	0.0107547			0.0580336	-0.10314	0.0658666			0.0708611	-0.106759	0.00477489			0.0944014	-0.22362	0.0216865			0.122739	-0.324165	0.0420801			-0.091602	-1.07649	0.175678			0.0394243	-1.6189	0.366488			-0.103988	-1.73929	0.450224			0.103005	-1.91276	0.484459
-0.0212254	-1.86417	0.596745			0.103335	-0.0898409	0.0123841			0.0856308	-0.104135	0.0649382			0.0663322	-0.108026	0.00485631			0.0971896	-0.224059	0.0215134			0.125507	-0.32075	0.04146			-0.0537069	-1.06864	0.173101			0.0568116	-1.61032	0.361844			-0.087881	-1.73445	0.444662			0.0877113	-1.90353	0.479153
-0.025923	-1.86137	0.58864			0.0859711	-0.091198	0.0134147			0.0823084	-0.103412	0.0641716			0.0438688	-0.102416	0.00523272			0.0832236	-0.221248	0.0209578			0.110607	-0.315627	0.0407919			-0.0531593	-1.06063	0.170974			0.0768853	-1.60138	0.357426			-0.0688308	-1.73238	0.4393			0.0740853	-1.8922	0.473233
-0.0213922	-1.8592	0.580769			0.0693635	-0.0904742	0.0132441			0.0703019	-0.104859	0.0628014			0.0493269	-0.105312	0.00585137			0.0927485	-0.219052	0.0214674			0.109154	-0.314688	0.0406246			-0.0544093	-1.05387	0.168475			0.0909052	-1.58955	0.352668			-0.0611496	-1.72432	0.434425			0.0693123	-1.88852	0.467345
-0.0304579	-1.8578	0.57292			0.0772847	-0.0909265	0.0132584			0.0639269	-0.102869	0.0620228			0.0380391	-0.108297	0.00682495			0.105979	-0.213693	0.0224866			0.106553	-0.313578	0.0405581			-0.0516642	-1.04284	0.166399			0.0841838	-1.58001	0.348032			-0.0727511	-1.71773	0.429111			0.067062	-1.8826	0.46129
-0.0383465	-1.85481	0.565176			0.101477	-0.0904742	0.0136386			0.0641943	-0.10124	0.0611392			0.0312927	-0.106035	0.00768527			0.144987	-0.210618	0.0234693			0.119358	-0.306663	0.0403167			-0.0520705	-1.03312	0.164431			0.0865047	-1.57026	0.343653			-0.0782493	-1.71036	0.423456			0.0902139	-1.87409	0.455192
-0.0339788	-1.85268	0.557918			0.126527	-0.089298	0.0134311			0.0370472	-0.102597	0.059995			0.00849226	-0.100969	0.00825442			0.15247	-0.209388	0.0238081			0.138344	-0.302565	0.0397828			-0.0358241	-1.02325	0.162078			0.0903108	-1.56094	0.340213			-0.0705166	-1.70721	0.417703			0.0886894	-1.86348	0.44906
-0.0325229	-1.854	0.550881			0.13258	-0.0881219	0.0129562			-0.00188517	-0.100155	0.059988			0.0329213	-0.101783	0.00901634			0.16016	-0.207719	0.0235269			0.175018	-0.305467	0.038989			-0.0711152	-1.01572	0.160878			0.0814518	-1.55688	0.336474			-0.0668745	-1.70192	0.411922			0.106091	-1.8611	0.442569
-0.034951	-1.85395	0.54358			0.1723	-0.0899313	0.0125208			-0.000259845	-0.0986167	0.0595583			0.0361219	-0.10504	0.00954041			0.169179	-0.20526	0.0240318			0.196955	-0.300601	0.038232			-0.0615301	-1.01082	0.159257			0.06652	-1.55089	0.332047			-0.0692371	-1.69425	0.406046			0.147666	-1.85179	0.436425
-0.0328293	-1.84953	0.536529			0.161878	-0.0916503	0.011922			-0.00127986	-0.0957216	0.0593208			0.0510193	-0.102326	0.010399			0.196755	-0.205787	0.0244098			0.187362	-0.298211	0.0377137			-0.0663902	-1.00484	0.157499			0.073098	-1.54091	0.328627			-0.105099	-1.68657	0.400517			0.154542	-1.84378	0.430182
-0.0282874	-1.84513	0.529366			0.139695	-0.0872172	0.0116347			0.000260635	-0.0952692	0.0584948			0.0539177	-0.100517	0.0107407			0.203445	-0.20157	0.0244188			0.16499	-0.298894	0.0368752			-0.110786	-0.995899	0.155863			0.0637588	-1.53093	0.325365			-0.104825	-1.6799	0.394867			0.166076	-1.84313	0.424492
-0.0418619	-1.8445	0.522472			0.128674	-0.0876695	0.0115407			0.00363543	-0.0951787	0.0578002			0.0500627	-0.101602	0.0104074			0.219499	-0.199637	0.0237585			0.177652	-0.297015	0.0356921			-0.113177	-0.98906	0.154401			0.0839984	-1.52664	0.321589			-0.121843	-1.66985	0.389222			0.18769	-1.83598	0.418382
-0.060796	-1.8422	0.515575			0.102966	-0.0864934	0.0111805			0.0460384	-0.0918313	0.0573702			0.0652502	-0.100336	0.0106973			0.219609	-0.199198	0.0232266			0.18462	-0.292234	0.0350683			-0.137161	-0.979424	0.153027			0.0675209	-1.52243	0.317492			-0.14402	-1.6634	0.383757			0.169496	-1.82667	0.412412
-0.0642362	-1.8378	0.508775			0.0960304	-0.0844126	0.0111583			0.0574151	-0.0957216	0.0573532			0.0675086	-0.0968977	0.0107227			0.233213	-0.197441	0.0227542			0.158494	-0.290185	0.0344181			-0.137102	-0.974062	0.151357			0.0749066	-1.51252	0.313247			-0.167492	-1.65772	0.378814			0.152083	-1.81802	0.407324
-0.0507878	-1.83312	0.501976			0.0964394	-0.0840507	0.010637			0.0850971	-0.0920122	0.0571721			0.0502039	-0.0980738	0.00986225			0.245973	-0.197792	0.0223568			0.157684	-0.290868	0.0333748			-0.142151	-0.969632	0.150121			0.0851027	-1.50683	0.309451			-0.152954	-1.64905	0.373561			0.148435	-1.81441	0.401572
-0.0499261	-1.82824	0.495523			0.113753	-0.0831459	0.0101007			0.0718207	-0.0902028	0.0565671			0.0896348	-0.0989785	0.00914323			0.228659	-0.192521	0.0221			0.154626	-0.285063	0.0325145			-0.157616	-0.96054	0.148617			0.101481	-1.49663	0.305076			-0.186335	-1.63793	0.368259			0.15019	-1.80539	0.39698
-0.0690775	-1.82062	0.489284			0.114174	-0.0807032	0.00945734			0.067666	-0.0909265	0.0560162			0.0967638	-0.0930979	0.00856485			0.232179	-0.194805	0.0223308			0.121877	-0.280196	0.0322066			-0.170237	-0.950515	0.146423			0.0918524	-1.48428	0.301136			-0.211967	-1.62926	0.363028			0.147243	-1.79644	0.391703
-0.0629647	-1.81454	0.482912			0.121075	-0.0784414	0.00879443			0.0629452	-0.0932788	0.0553979			0.113456	-0.0929169	0.00833674			0.20469	-0.191028	0.0219508			0.136095	-0.278233	0.0316062			-0.16015	-0.940956	0.145001			0.0905448	-1.47504	0.297247			-0.224183	-1.62442	0.35797			0.115449	-1.78561	0.386817
-0.0496814	-1.81281	0.476493			0.14704	-0.0774462	0.00811221			0.0782042	-0.0929169	0.0541453			0.109865	-0.0935502	0.00786956			0.18444	-0.188568	0.0215605			0.154436	-0.276611	0.0303166			-0.155959	-0.931941	0.1436			0.0672985	-1.46625	0.293395			-0.213066	-1.61452	0.352826			0.10351	-1.77573	0.382059
-0.0515415	-1.80625	0.470286			0.166582	-0.0784414	0.00773196			0.0660944	-0.0907456	0.0528366			0.0968213	-0.0907456	0.0075394			0.190383	-0.185757	0.0206463			0.156664	-0.269781	0.0292812			-0.155932	-0.926812	0.141345			0.0565171	-1.45642	0.289729			-0.244849	-1.61115	0.347714			0.104777	-1.76288	0.376775
-0.0478691	-1.79699	0.464086			0.177851	-0.077989	0.00691267			0.0709677	-0.0922836	0.052595			0.0670297	-0.0900218	0.0067761			0.192504	-0.185581	0.0204633			0.153327	-0.267049	0.0288201			-0.153385	-0.919274	0.139132			0.0694653	-1.44067	0.285595			-0.239369	-1.60163	0.342257			0.107506	-1.7543	0.371459
-0.0382285	-1.79069	0.457732			0.184039	-0.0783509	0.00653781			0.0759348	-0.0905646	0.0525512			0.0720458	-0.0939121	0.00622263			0.1883	-0.179344	0.0199533			0.149959	-0.266451	0.0286999			-0.136278	-0.908472	0.137049			0.0614961	-1.42988	0.281218			-0.272855	-1.58959	0.33728			0.102195	-1.74715	0.366124
-0.0291185	-1.78601	0.451494			0.179339	-0.0763606	0.00661335			0.0460938	-0.0907456	0.0527623			0.095531	-0.0957216	0.00583029			0.218563	-0.176006	0.0190232			0.164557	-0.260987	0.0282692			-0.141005	-0.898758	0.135472			0.0398092	-1.42115	0.277239			-0.242274	-1.58284	0.332387			0.0810597	-1.73669	0.361385
-0.0300947	-1.77935	0.44529			0.163657	-0.0765415	0.00637443			0.0541497	-0.0913789	0.0525076			0.0665276	-0.0908361	0.00551895			0.191243	-0.1746	0.0181693			0.160393	-0.257999	0.0268698			-0.127965	-0.892152	0.133701			0.054416	-1.41325	0.27341			-0.231914	-1.57478	0.327609			0.117402	-1.72478	0.356268
-0.0221317	-1.77561	0.439173			0.184691	-0.0780795	0.00593813			0.0182479	-0.0906551	0.0515964			0.0517832	-0.089298	0.00535573			0.178283	-0.175918	0.0171455			0.167866	-0.258511	0.025951			-0.145199	-0.887256	0.131838			0.0522487	-1.40437	0.269434			-0.232881	-1.56972	0.323336			0.126626	-1.71655	0.35177
-0.0310201	-1.77032	0.433106			0.173729	-0.0787128	0.0066537			0.0254915	-0.0850459	0.050992			0.0525874	-0.0943645	0.00536482			0.182428	-0.172316	0.0163494			0.16133	-0.257572	0.0250856			-0.157111	-0.881816	0.129924			0.0873312	-1.39772	0.265859			-0.232592	-1.56005	0.31933			0.140846	-1.70854	0.347209
-0.045065	-1.76382	0.426778			0.142519	-0.0770843	0.0076113			0.0290932	-0.0842316	0.0509435			0.0298314	-0.0923741	0.0056082			0.169278	-0.172228	0.0162874			0.172799	-0.253901	0.024472			-0.141881	-0.876299	0.12807			0.0927043	-1.39092	0.261983			-0.237087	-1.55007	0.315007			0.162589	-1.70003	0.342565
-0.0261583	-1.7548	0.420805			0.135093	-0.0790747	0.00935236			0.0145048	-0.0841411	0.0505461			0.0406373	-0.0898409	0.00653922			0.171136	-0.171174	0.015572			0.185802	-0.251852	0.0238462			-0.123724	-0.866818	0.126904			0.107411	-1.37821	0.259078			-0.215987	-1.54179	0.310628			0.129372	-1.69361	0.338201
-0.0264057	-1.7497	0.414835			0.145672	-0.0757272	0.0100045			0.0207139	-0.0837793	0.0491664			0.0917692	-0.08776	0.00755384			0.130684	-0.167748	0.0146632			0.168259	-0.25245	0.0234045			-0.110832	-0.859357	0.124762			0.0749964	-1.37096	0.255809			-0.190434	-1.53058	0.306277			0.115043	-1.68459	0.33346
-0.0379679	-1.74546	0.408945			0.173879	-0.074913	0.0092907			0.02839	-0.0833269	0.0485892			0.0734682	-0.0899313	0.00850277			0.129573	-0.168099	0.0143527			0.20121	-0.248266	0.0229214			-0.130732	-0.854384	0.12344			0.0634254	-1.36882	0.252291			-0.143588	-1.52306	0.30184			0.123188	-1.67355	0.329327
-0.0424201	-1.73598	0.403247			0.1656	-0.0743702	0.0105151			0.010722	-0.0842316	0.0482421			0.0595639	-0.0872172	0.00939984			0.123002	-0.16889	0.0142683			0.170214	-0.246046	0.0224222			-0.144682	-0.850032	0.122414			0.0602	-1.35928	0.249013			-0.127644	-1.517	0.297327			0.144965	-1.66323	0.324853
-0.049413	-1.72618	0.39753			0.155725	-0.0759082	0.0111828			0.0213791	-0.0817889	0.0485583			0.0689196	-0.0874886	0.010428			0.109915	-0.168275	0.0137025			0.156143	-0.245534	0.0212811			-0.164095	-0.84296	0.121145			0.031337	-1.34893	0.245843			-0.138485	-1.50534	0.293264			0.125146	-1.65608	0.320718
-0.0333473	-1.71893	0.391963			0.13493	-0.0703894	0.0111145			0.00912582	-0.0809746	0.04908			0.0976942	-0.087941	0.0113983			0.0834199	-0.164322	0.0133645			0.132629	-0.241863	0.0204983			-0.156472	-0.832857	0.119943			0.0423897	-1.33807	0.242822			-0.148274	-1.49299	0.289471			0.0973212	-1.64685	0.31686
-0.0436092	-1.70957	0.386436			0.134779	-0.0710227	0.0115263			0.0233547	-0.0817889	0.0489607			0.0911332	-0.0845935	0.0117741			0.0981908	-0.162389	0.0134222			0.129445	-0.238875	0.0199692			-0.18078	-0.823998	0.117617			0.0295204	-1.32831	0.239559			-0.16377	-1.48309	0.285754			0.111413	-1.63501	0.31337
-0.0398299	-1.69946	0.381114			0.13046	-0.06858	0.0124164			0.0198021	-0.084503	0.0480565			0.0910625	-0.0817889	0.0129346			0.094259	-0.16274	0.0135872			0.11763	-0.234009	0.0195406			-0.173282	-0.815916	0.116308			0.0595227	-1.31559	0.235935			-0.174032	-1.47695	0.282119			0.115168	-1.62368	0.309929
-0.0395339	-1.693	0.376088			0.129669	-0.0672229	0.0149332			-0.00355046	-0.0842316	0.0476027			0.0814183	-0.0838697	0.0137891			0.0947248	-0.161071	0.0133892			0.115506	-0.234265	0.0189378			-0.171315	-0.809621	0.115451			0.0549576	-1.30643	0.233147			-0.171658	-1.4679	0.278546			0.10502	-1.61214	0.305988
-0.0330223	-1.68517	0.371645			0.164484	-0.0665896	0.0165012			0.00898278	-0.0813365	0.0477577			0.0879543	-0.0864029	0.0137029			0.0930854	-0.159314	0.0134617			0.111223	-0.227862	0.0180404			-0.160485	-0.803637	0.114001			0.064392	-1.29637	0.230471			-0.181821	-1.45899	0.275501			0.099	-1.5985	0.302052
-0.0170481	-1.67226	0.366991			0.136863	-0.0705703	0.017059			0.00437324	-0.0825126	0.0480108			0.0671526	-0.0853173	0.014306			0.108111	-0.157381	0.0132206			0.116247	-0.224703	0.0172223			-0.142627	-0.796954	0.111664			0.0630472	-1.28262	0.227779			-0.185244	-1.44948	0.271982			0.0978593	-1.58811	0.298221
-0.0280728	-1.66258	0.362309			0.102405	-0.0693942	0.0179179			0.00908663	-0.0828745	0.0472507			0.0527092	-0.0818793	0.0157165			0.113803	-0.154043	0.0129723			0.123613	-0.22513	0.0174673			-0.157158	-0.786074	0.109827			0.044117	-1.27109	0.225061			-0.199495	-1.43782	0.268542			0.090081	-1.57844	0.294473
-0.0215355	-1.65654	0.358196			0.0965573	-0.0679467	0.0190115			0.00493905	-0.081246	0.0470178			0.0457033	-0.0839602	0.0170514			0.105029	-0.151583	0.0130183			0.147573	-0.221629	0.0181465			-0.162422	-0.777836	0.108738			0.0285135	-1.26281	0.222468			-0.197656	-1.42876	0.265017			0.106419	-1.56776	0.290595
-0.0329714	-1.64972	0.35436			0.128154	-0.0674038	0.0199143			0.0342767	-0.0806127	0.0465935			0.0329162	-0.0839602	0.0171966			0.109934	-0.150002	0.0132734			0.144714	-0.218129	0.0177032			-0.156412	-0.77465	0.107758			0.0294439	-1.25697	0.219776			-0.154518	-1.42347	0.260758			0.0976719	-1.5552	0.286967
-0.0362718	-1.6405	0.350329			0.124226	-0.0702989	0.0202293			0.00394948	-0.0789842	0.046504			0.0575052	-0.0808841	0.0170451			0.0913114	-0.149914	0.0135642			0.13657	-0.218556	0.0173501			-0.163741	-0.769132	0.105959			0.0184388	-1.24478	0.217184			-0.1683	-1.41303	0.257226			0.0870015	-1.54279	0.282903
-0.0214338	-1.63289	0.346437			0.110927	-0.0727417	0.0206862			-0.0022962	-0.0756368	0.0461157			0.0519067	-0.0832364	0.0175526			0.108533	-0.149826	0.0131628			0.141206	-0.218983	0.0176569			-0.148031	-0.764314	0.104098			0.0377272	-1.23812	0.213951			-0.159252	-1.40206	0.253838			0.101838	-1.53644	0.278835
-0.0201336	-1.62457	0.342805			0.0991058	-0.069937	0.0221652			-0.0138693	-0.0745511	0.045378			0.12753	-0.084503	0.018208			0.0780815	-0.148157	0.0131564			0.153509	-0.215909	0.0192255			-0.144057	-0.757475	0.102548			0.038417	-1.23132	0.210346			-0.129296	-1.39201	0.25065			0.0770735	-1.52828	0.274861
-0.0198396	-1.61389	0.339136			0.0975462	-0.071656	0.0226221			-0.0328658	-0.0755463	0.0445308			0.127779	-0.0799794	0.0182022			0.0642779	-0.146049	0.013813			0.143944	-0.213262	0.0189679			-0.151407	-0.749782	0.101095			0.0629461	-1.22134	0.20762			-0.114053	-1.38111	0.247171			0.100902	-1.51789	0.270614
-0.0288126	-1.60613	0.335433			0.0692128	-0.0693037	0.0223812			-0.0318593	-0.0740083	0.0439877			0.132736	-0.0788938	0.0177112			0.0700645	-0.146576	0.0138072			0.150966	-0.214543	0.0180441			-0.135585	-0.743798	0.099154			0.0680543	-1.21476	0.204961			-0.127879	-1.37413	0.243305			0.0972735	-1.51032	0.266497
-0.0389815	-1.5991	0.331833			0.0857066	-0.0671324	0.0225173			-0.0383551	-0.0729226	0.0432634			0.119871	-0.0810651	0.0181252			0.0610089	-0.145961	0.0134145			0.126788	-0.212067	0.0178186			-0.138331	-0.740378	0.0974169			0.038589	-1.20981	0.202197			-0.142711	-1.36446	0.23948			0.0957231	-1.50028	0.262355
-0.0376127	-1.58974	0.328748			0.079063	-0.0674943	0.0225576			-0.0426854	-0.0712941	0.041841			0.127397	-0.0797985	0.0174378			0.102225	-0.145697	0.0133899			0.12834	-0.209079	0.0179693			-0.139518	-0.736648	0.0956519			0.0385111	-1.20331	0.198837			-0.151925	-1.35503	0.236288			0.115131	-1.48867	0.258329
-0.0467759	-1.57698	0.325722			0.088408	-0.0676752	0.0222394			-0.0140689	-0.0712941	0.0408114			0.115062	-0.0753654	0.0174525			0.114588	-0.144028	0.0137862			0.154209	-0.206774	0.0177499			-0.16271	-0.729499	0.0941842			0.0184978	-1.18897	0.196198			-0.129328	-1.34467	0.232603			0.105414	-1.47828	0.254543
-0.0339551	-1.5663	0.322431			0.0620412	-0.0634231	0.0217242			-0.0122148	-0.0697561	0.0399323			0.109289	-0.0762701	0.0171135			0.0889342	-0.143326	0.0133349			0.164965	-0.20703	0.0171712			-0.152385	-0.71893	0.0930234			0.0324859	-1.18054	0.193647			-0.170665	-1.33132	0.228842			0.110784	-1.47019	0.250669
-0.00883657	-1.55886	0.31934			0.0816355	-0.0608898	0.0204621			0.0033601	-0.0730131	0.0388793			0.12181	-0.0771748	0.016915			0.095989	-0.140251	0.0124125			0.164731	-0.203786	0.0162863			-0.169912	-0.712013	0.0921601			-0.00423433	-1.17211	0.191089			-0.154253	-1.32265	0.225543			0.0999504	-1.45959	0.246651
-0.013632	-1.54706	0.316423			0.0832271	-0.061885	0.0200918			-0.0038049	-0.0759987	0.0384589			0.107229	-0.073194	0.0165716			0.105505	-0.139987	0.0118844			0.14847	-0.199859	0.0157532			-0.126335	-0.70533	0.0905731			-0.0092692	-1.15999	0.188668			-0.168955	-1.31605	0.222651			0.0931932	-1.44263	0.242851
-0.0156411	-1.5361	0.31365			0.0820965	-0.0626993	0.0195046			-0.0137378	-0.0754558	0.0380653			0.109969	-0.071837	0.0163402			0.103807	-0.140514	0.012156			0.142903	-0.196614	0.0153596			-0.116064	-0.698802	0.0899833			0.00777677	-1.14831	0.186099			-0.166185	-1.3083	0.220033			0.0876286	-1.42985	0.239247
-0.023994	-1.52778	0.310689			0.104299	-0.0597137	0.0187028			0.0318152	-0.0738273	0.0375894			0.138774	-0.0769939	0.0168725			0.112177	-0.136298	0.0122078			0.126767	-0.195334	0.0152728			-0.128803	-0.693984	0.0900466			0.0124978	-1.14047	0.183875			-0.173273	-1.29702	0.216868			0.046166	-1.42221	0.235236
-0.0255756	-1.51682	0.307913			0.109933	-0.0625183	0.0177297			0.0100122	-0.0744606	0.0368851			0.154558	-0.0762701	0.0166984			0.106122	-0.134277	0.0120897			0.117608	-0.19226	0.0151181			-0.11671	-0.687767	0.089632			-0.0123027	-1.12554	0.181471			-0.18394	-1.28566	0.21313			0.062002	-1.40914	0.23157
-0.00670561	-1.50347	0.30537			0.0971971	-0.0635135	0.0170031			0.022068	-0.0753654	0.0372723			0.181188	-0.0730131	0.0165496			0.107865	-0.132959	0.0121813			0.11665	-0.19098	0.0155604			-0.107222	-0.678053	0.0894033			-0.00790003	-1.11467	0.179172			-0.175811	-1.27599	0.209619			0.0479564	-1.3989	0.228153
-0.00792296	-1.49623	0.3029			0.082921	-0.060347	0.0165856			0.0318122	-0.0751844	0.0373773			0.176293	-0.0731036	0.0168358			0.11266	-0.129357	0.0125095			0.0966874	-0.190382	0.0155935			-0.0841886	-0.669582	0.0889158			-0.02046	-1.10743	0.177011			-0.150561	-1.26525	0.206461			0.0162247	-1.38742	0.22533
-0.0179779	-1.48914	0.300416			0.0662741	-0.0600756	0.0167091			-0.00427541	-0.0740083	0.0367617			0.177326	-0.0746416	0.0165726			0.0967773	-0.131114	0.0129406			0.10211	-0.189101	0.0153134			-0.0966601	-0.666007	0.0883522			-0.00724966	-1.10203	0.175178			-0.138852	-1.25973	0.203085			0.0106924	-1.37653	0.222587
-0.0190739	-1.47966	0.297872			0.0369392	-0.0641468	0.0165746			0.00448338	-0.0721988	0.0368434			0.153561	-0.0730131	0.0159074			0.0764434	-0.129533	0.0134977			0.0806522	-0.186284	0.015325			-0.10241	-0.664142	0.0882714			-0.0176728	-1.09301	0.173162			-0.128206	-1.25175	0.199732			0.0210567	-1.36549	0.219681
-0.0226589	-1.46817	0.295673			0.0390861	-0.0641468	0.0162986			0.0105852	-0.0694847	0.0365155			0.158043	-0.0746416	0.0153392			0.12579	-0.1305	0.0133101			0.0958196	-0.186284	0.0151418			-0.114257	-0.659712	0.0878302			-0.0257582	-1.08303	0.170548			-0.123978	-1.24009	0.196634			0.0130626	-1.35647	0.217139
-0.0155726	-1.45953	0.292886			0.0382722	-0.0609803	0.0161583			-0.0100275	-0.0675848	0.0360959			0.17907	-0.0750035	0.0142832			0.103296	-0.129094	0.0136924			0.0753139	-0.187991	0.0149755			-0.121447	-0.651786	0.0874638			-0.026488	-1.07926	0.168383			-0.101664	-1.22812	0.193377			0.0197022	-1.3525	0.215099
-0.0126271	-1.45189	0.289721			0.0374684	-0.0612517	0.0159335			-0.0141694	-0.0674038	0.0358884			0.181922	-0.0720179	0.0136224			0.119994	-0.126634	0.0138716			0.0853014	-0.184747	0.0149852			-0.116742	-0.647123	0.0874904			-0.0342746	-1.07069	0.166331			-0.109226	-1.21945	0.190562			0.0280454	-1.33951	0.213397
-0.0210173	-1.441	0.286373			0.0556692	-0.0622469	0.0155668			-0.0076813	-0.069937	0.0363697			0.137406	-0.0674943	0.0128897			0.128163	-0.127425	0.0142206			0.095092	-0.185345	0.0156975			-0.110636	-0.641916	0.0863835			0.00358606	-1.06381	0.163971			-0.115646	-1.21231	0.187546			0.0425054	-1.32962	0.211144
-0.0109071	-1.43224	0.283177			0.0439937	-0.0592614	0.0151114			0.00876397	-0.0684895	0.0378927			0.136066	-0.0693942	0.011799			0.121535	-0.129357	0.0145011			0.0990048	-0.185516	0.0164611			-0.0829835	-0.638807	0.0850038			0.007539	-1.0562	0.162157			-0.0998524	-1.20326	0.184865			0.0405882	-1.32118	0.209131
-0.00674961	-1.42281	0.279847			0.0465162	-0.0591709	0.0150259			-0.00217442	-0.0669515	0.0380476			0.142541	-0.0706608	0.0109147			0.106141	-0.127337	0.0141878			0.103087	-0.184064	0.0169973			-0.0962659	-0.633678	0.084176			0.00639561	-1.05088	0.159831			-0.100233	-1.19336	0.182169			0.00925607	-1.31295	0.208366
0.000213801	-1.4092	0.276167			0.0288546	-0.0607089	0.0144601			-0.0300412	-0.0662277	0.0376496			0.153414	-0.0670419	0.00985054			0.0964877	-0.125756	0.0141725			0.127157	-0.179454	0.017403			-0.101955	-0.628161	0.0838072			0.00703304	-1.03979	0.158414			-0.0781483	-1.18208	0.180189			-0.00746019	-1.30076	0.207533
6.83826e-05	-1.39622	0.272836			0.0306386	-0.0548282	0.0141067			-0.0365596	-0.0677657	0.0379146			0.131336	-0.0621564	0.00913616			0.102174	-0.123999	0.0137008			0.113621	-0.1786	0.0179497			-0.100277	-0.61798	0.0830369			0.00709467	-1.02863	0.156432			-0.0575164	-1.17187	0.178086			-0.0196576	-1.29188	0.206494
-0.00338095	-1.38865	0.26958			0.0207411	-0.0504856	0.0136494			-0.0514135	-0.0711132	0.0387453			0.116867	-0.0656849	0.00849477			0.130808	-0.122154	0.0137203			0.109362	-0.177661	0.0187391			-0.0897991	-0.608888	0.0819913			0.0306249	-1.02197	0.154276			-0.0814087	-1.16366	0.176323			-0.00103313	-1.28207	0.204494
-0.0187029	-1.37924	0.266688			0.0105804	-0.0533807	0.0142752			-0.0278617	-0.0704799	0.0401387			0.115473	-0.0664086	0.00864768			0.135468	-0.12066	0.0134813			0.133791	-0.173905	0.018859			-0.074278	-0.605546	0.0809007			0.0241476	-1.01081	0.151883			-0.065844	-1.15768	0.174596			-0.00228631	-1.26597	0.203094
-0.0114603	-1.36644	0.263933			0.0147535	-0.0530188	0.0139577			-0.0214352	-0.0723798	0.0402251			0.128921	-0.0637849	0.00863942			0.103107	-0.123999	0.0131694			0.117768	-0.1716	0.0183563			-0.0834236	-0.601738	0.0804108			0.0180662	-1.00083	0.149528			-0.0674334	-1.14786	0.173198			-0.00604902	-1.25205	0.201296
-0.0120397	-1.35543	0.260913			0.00258245	-0.0536521	0.0129554			-0.0456654	-0.0713846	0.0405242			0.146527	-0.0663182	0.00842841			0.110211	-0.120748	0.0128673			0.0966981	-0.170917	0.0182176			-0.0919249	-0.595055	0.0797661			0.0133222	-0.988932	0.147074			-0.0632403	-1.13719	0.171277			0.0334695	-1.24591	0.199147
-0.0129853	-1.34532	0.257908			-0.00565376	-0.0526569	0.0125911			-0.0424924	-0.070118	0.0402202			0.157504	-0.0656849	0.00854608			0.145799	-0.110118	0.0111608			0.128862	-0.16938	0.0185614			-0.0834742	-0.587517	0.0785341			0.0203717	-0.980504	0.14484			-0.0562834	-1.12691	0.169285			0.0297553	-1.23603	0.197228
-0.0135085	-1.33434	0.255037			-0.00120193	-0.0533807	0.0119904			-0.00638844	-0.0708418	0.041479			0.131283	-0.0614327	0.00838232			0.133853	-0.10801	0.0116715			0.116544	-0.165538	0.0185024			-0.108622	-0.581067	0.077482			0.0373019	-0.969416	0.142614			-0.0312081	-1.11977	0.16764			0.0303985	-1.22275	0.194738
-0.0219811	-1.32539	0.251988			-0.0124799	-0.0520236	0.0119201			0.0250204	-0.0725607	0.0414741			0.138435	-0.0604375	0.00799671			0.132928	-0.108976	0.0119248			0.119461	-0.165965	0.0178109			-0.0938624	-0.576948	0.07686			0.0592582	-0.96328	0.140588			-0.0195413	-1.1121	0.166397			0.0318958	-1.21135	0.193028
-0.016416	-1.31838	0.248622			0.00865787	-0.0529283	0.0116338			0.0521782	-0.0705703	0.0406128			0.163489	-0.0626993	0.00779219			0.121517	-0.107922	0.0121546			0.128609	-0.167245	0.0177608			-0.0841274	-0.573451	0.0763971			0.0750112	-0.958328	0.138234			-0.0274031	-1.10213	0.164852			0.043906	-1.20305	0.191474
-0.000367869	-1.30849	0.245508			0.0208078	-0.0548282	0.0108201			0.0346778	-0.0678562	0.0409237			0.165531	-0.0634231	0.00739437			0.106948	-0.108713	0.0121412			0.111194	-0.164172	0.0175884			-0.0691409	-0.569099	0.0755687			0.0691182	-0.951305	0.136342			-0.0173553	-1.09461	0.16322			0.0405549	-1.19338	0.189931
-0.00760305	-1.29668	0.242355			0.0364359	-0.0554615	0.0106947			0.0306757	-0.0667705	0.0408651			0.144924	-0.0615231	0.00647661			0.108156	-0.109328	0.0118956			0.114833	-0.164513	0.017413			-0.0589834	-0.566068	0.0744528			0.0559799	-0.940956	0.134515			-0.0200709	-1.08601	0.162075			0.0254822	-1.18458	0.188324
0.00478709	-1.28729	0.239548			0.0173552	-0.0528378	0.0107166			0.0599253	-0.066861	0.0398446			0.134688	-0.0594423	0.00621685			0.114972	-0.107746	0.0116705			0.111943	-0.165709	0.0174907			-0.0489521	-0.559074	0.0730867			0.0728462	-0.93556	0.133156			0.00776344	-1.07665	0.161771			0.0333841	-1.18075	0.186576
-0.00589255	-1.27948	0.236657			0.0044569	-0.0518426	0.0111424			0.0528298	-0.0652325	0.0386149			0.124193	-0.0610708	0.00647468			0.114806	-0.105902	0.0114249			0.116594	-0.166392	0.0168386			-0.0503871	-0.554722	0.0724857			0.0643935	-0.930607	0.131563			0.00303322	-1.0656	0.161185			0.0133503	-1.16928	0.18517
-0.0113969	-1.26943	0.233327			0.00839716	-0.0501237	0.0115419			0.0242025	-0.0680371	0.0380656			0.120005	-0.0578138	0.00632914			0.119215	-0.105726	0.0113686			0.116086	-0.160501	0.0167118			-0.0521356	-0.550292	0.0715398			0.0940255	-0.925876	0.129538			-0.0181406	-1.06215	0.160192			-0.0121006	-1.15932	0.183188
-0.00631819	-1.25827	0.230274			0.000937938	-0.0503046	0.0122004			0.0456567	-0.0690323	0.03745			0.0998091	-0.0560948	0.00607271			0.10685	-0.108098	0.0116948			0.0901553	-0.16383	0.0159394			-0.0814538	-0.549282	0.070961			0.108779	-0.91597	0.128357			-0.012006	-1.05256	0.159099			-0.00243853	-1.15023	0.181562
-0.00800728	-1.24891	0.227259			0.0264646	-0.0475905	0.012717			0.0536407	-0.0664991	0.0359755			0.087894	-0.0582662	0.00595419			0.13445	-0.106517	0.0123087			0.099157	-0.163745	0.0157278			-0.0804952	-0.544619	0.0699471			0.136345	-0.91087	0.127208			-0.0043758	-1.04335	0.158557			-0.00225767	-1.1438	0.180874
-0.0103851	-1.23685	0.224177			0.0357681	-0.0475	0.0126852			0.0891682	-0.0632421	0.0347408			0.0677881	-0.0560044	0.00619876			0.138091	-0.105111	0.0130998			0.106007	-0.15922	0.0156567			-0.0959971	-0.536537	0.0687901			0.142435	-0.902443	0.125875			0.00492766	-1.03238	0.157315			-0.000600993	-1.13464	0.179935
-0.0109965	-1.22396	0.221076			0.0586229	-0.0452382	0.0132283			0.0768449	-0.0682181	0.0337353			0.0521014	-0.0500332	0.00671476			0.126915	-0.105462	0.0133714			0.0999471	-0.157171	0.0149958			-0.095123	-0.529931	0.0682377			0.154946	-0.892019	0.12414			0.00540589	-1.02409	0.155908			0.00380641	-1.12179	0.177832
-0.0125154	-1.21497	0.217939			0.050617	-0.0412574	0.0133324			0.0652153	-0.0697561	0.03381			0.0542915	-0.0498523	0.00675805			0.121127	-0.102651	0.0145106			0.0796087	-0.156061	0.0148223			-0.112101	-0.52387	0.0679035			0.139039	-0.883814	0.122867			0.0125577	-1.01795	0.154804			-0.0101938	-1.11249	0.175991
-0.0104857	-1.207	0.214977			0.0505092	-0.0415288	0.0127827			0.0433061	-0.0691228	0.0331827			0.0197005	-0.0539235	0.0067357			0.129957	-0.103266	0.0160972			0.0770831	-0.15461	0.0146184			-0.115139	-0.519362	0.0666884			0.143454	-0.875239	0.121368			-0.00270965	-1.00806	0.153987			-0.0165065	-1.09986	0.17486
-0.00973242	-1.19494	0.212206			0.0520242	-0.0430669	0.0128017			0.05047	-0.0702989	0.0325261			0.0421372	-0.0497618	0.00746741			0.1422	-0.103354	0.0179851			0.0834784	-0.15128	0.0149284			-0.0808652	-0.517186	0.0653455			0.133367	-0.865999	0.12018			-0.0117628	-1.00261	0.152493			-0.0216323	-1.08636	0.17296
-0.00678476	-1.17986	0.209686			0.0720518	-0.0430669	0.0121072			0.055383	-0.0700275	0.0321581			0.06638	-0.0503951	0.00811089			0.199127	-0.101861	0.0187747			0.0642189	-0.149744	0.014951			-0.0598837	-0.51027	0.0646574			0.141007	-0.854393	0.118691			0.00509767	-0.992019	0.150605			-0.0353781	-1.08124	0.170321
-0.0101489	-1.17197	0.207228			0.109358	-0.0427954	0.0119874			0.0533628	-0.0706608	0.0325319			0.0845305	-0.0514808	0.00835221			0.190492	-0.0970288	0.0192302			0.0362363	-0.152732	0.0140743			-0.0416169	-0.502654	0.0640966			0.147669	-0.847223	0.117504			-0.00437985	-0.981738	0.148947			-0.0287526	-1.07222	0.167709
-0.0161607	-1.1635	0.204536			0.111223	-0.0403527	0.0127575			0.0516766	-0.070118	0.0330839			0.0847735	-0.050576	0.00859754			0.188113	-0.0959746	0.0203214			0.0389128	-0.146841	0.013624			-0.0491785	-0.500012	0.0630931			0.155826	-0.841678	0.116319			-0.00313115	-0.976136	0.146903			-0.0462901	-1.05966	0.165252
-0.0156545	-1.15262	0.201874			0.126963	-0.0428859	0.0128159			0.0270016	-0.0715655	0.032739			0.0807668	-0.0478619	0.00865151			0.225576	-0.0971167	0.0212523			0.0339054	-0.145389	0.0132776			-0.0758804	-0.493795	0.0618462			0.158519	-0.832069	0.114458			-0.0252107	-0.971379	0.145007			-0.0702611	-1.04804	0.16258
-0.0273876	-1.14455	0.199313			0.113785	-0.0424336	0.0126412			0.0501197	-0.0710227	0.0320809			0.0924843	-0.0501237	0.0087018			0.2553	-0.0987858	0.0208711			0.0390883	-0.148463	0.012961			-0.0974751	-0.492007	0.061066			0.167234	-0.826598	0.113968			0.00714055	-0.962632	0.143012			-0.0695457	-1.04083	0.159791
-0.033484	-1.13697	0.196556			0.105943	-0.0454191	0.0125372			0.0338031	-0.0658658	0.0316188			0.105678	-0.0514808	0.00878802			0.247018	-0.0971167	0.0213623			0.0308727	-0.145987	0.0126152			-0.0909451	-0.489287	0.0616937			0.15824	-0.822163	0.112884			0.0247485	-0.952887	0.141454			-0.102096	-1.03664	0.157064
-0.0293635	-1.12437	0.193867			0.0785861	-0.0437002	0.0122327			0.0442508	-0.066861	0.0322462			0.093381	-0.0482238	0.00860873			0.23434	-0.0989615	0.0216479			0.047387	-0.145389	0.0125942			-0.105787	-0.484469	0.0619217			0.122986	-0.815214	0.111755			0.0283858	-0.94368	0.139937			-0.0950732	-1.02546	0.154908
-0.0182158	-1.11327	0.191453			0.0808333	-0.042705	0.0115444			0.0322539	-0.0661372	0.0325403			0.101699	-0.0467762	0.00870012			0.220544	-0.0966774	0.0220691			0.0225282	-0.144792	0.0130825			-0.103862	-0.479029	0.0611513			0.117822	-0.806344	0.110308			0.0137075	-0.938386	0.138422			-0.117514	-1.02005	0.153109
-0.0172545	-1.10684	0.189261			0.0886893	-0.0407146	0.011141			0.0205604	-0.0675848	0.0325293			0.09393	-0.0469572	0.00905232			0.200097	-0.0966774	0.022224			0.037179	-0.147695	0.0137405			-0.110982	-0.475843	0.0602163			0.107548	-0.805383	0.108948			0.0265845	-0.929869	0.137326			-0.101739	-1.01232	0.150841
-0.0202085	-1.0978	0.187088			0.0639405	-0.0380909	0.0107547			0.0178146	-0.0676752	0.0318467			0.0725135	-0.0458715	0.00967812			0.21102	-0.0964139	0.0221857			0.0713939	-0.144536	0.0151546			-0.12783	-0.4739	0.0597717			0.126613	-0.801095	0.108112			0.0427068	-0.923884	0.135972			-0.0997088	-1.00078	0.149122
-0.0117892	-1.08564	0.184835			0.0847466	-0.0397194	0.0108635			0.0136359	-0.0680371	0.0313614			0.0798551	-0.0435192	0.0099155			0.199313	-0.0979952	0.0224004			0.0758197	-0.143084	0.0152944			-0.125035	-0.471569	0.0588715			0.128218	-0.792151	0.107593			0.0474962	-0.916441	0.134602			-0.0890816	-0.995583	0.147174
-0.0206381	-1.0745	0.182317			0.0853731	-0.0385433	0.0105477			0.0176936	-0.0654134	0.0312929			0.0675703	-0.0434288	0.00914372			0.209196	-0.0979073	0.022928			0.0872582	-0.144109	0.0155539			-0.130565	-0.465896	0.0576103			0.152514	-0.784389	0.106008			0.0882431	-0.905929	0.13376			-0.076862	-0.987068	0.145295
-0.0358205	-1.06443	0.180281			0.0783476	-0.0343816	0.00998345			0.0132847	-0.0648706	0.0304559			0.050342	-0.0436097	0.00844063			0.217831	-0.0936905	0.0229564			0.0589166	-0.14095	0.0158495			-0.130456	-0.460378	0.0561148			0.152409	-0.779362	0.105086			0.0794352	-0.898179	0.132556			-0.0667649	-0.981655	0.14304
-0.0398138	-1.0527	0.178487			0.0791306	-0.0336578	0.00993656			0.0182736	-0.0686704	0.0290989			0.038115	-0.03791	0.00721086			0.221035	-0.0960625	0.0224295			0.0559194	-0.138474	0.0169495			-0.119669	-0.451907	0.0545677			0.122653	-0.770935	0.104971			0.0491267	-0.890737	0.130889			-0.0783489	-0.969244	0.141111
-0.0472313	-1.04259	0.176489			0.0764294	-0.0327531	0.00996388			0.00304745	-0.0709322	0.0283142			0.0237234	-0.0361005	0.00630089			0.209354	-0.0935148	0.0220702			0.0486605	-0.135571	0.0178384			-0.123874	-0.446778	0.0531062			0.102099	-0.761325	0.104373			0.0278388	-0.885826	0.129257			-0.0771019	-0.956759	0.13914
-0.0413339	-1.03309	0.174694			0.0416406	-0.0307627	0.00963675			0.0429098	-0.0698466	0.0278538			0.0285825	-0.0432478	0.00528001			0.212139	-0.0925485	0.0217416			0.0489968	-0.136596	0.0183631			-0.0904195	-0.444292	0.0518873			0.105712	-0.75445	0.103829			0.0124469	-0.877079	0.128289			-0.0827067	-0.948028	0.13724
-0.0559416	-1.0227	0.172751			0.066044	-0.0327531	0.00920451			0.0486116	-0.0706608	0.027945			-0.0037587	-0.0413479	0.00417315			0.217064	-0.0925485	0.0211073			0.0244094	-0.132412	0.0190198			-0.105997	-0.44025	0.0505223			0.0660629	-0.745432	0.102774			0.0285483	-0.870557	0.127311			-0.0848544	-0.936915	0.135229
-0.0664085	-1.00891	0.170934			0.0310754	-0.0339292	0.00913824			0.0393402	-0.0696656	0.0277106			-0.012534	-0.0396289	0.00355134			0.189762	-0.089298	0.0196327			0.0417327	-0.131815	0.0195011			-0.105198	-0.434655	0.0493674			0.0510068	-0.734417	0.103004			0.00502741	-0.862193	0.125419			-0.0704701	-0.927389	0.133829
-0.0670523	-0.999482	0.168875			0.0164625	-0.0318483	0.00885543			0.038523	-0.0711132	0.0267323			-0.00761055	-0.0400813	0.00274041			0.226155	-0.0871018	0.0183865			0.0689691	-0.131815	0.0208219			-0.103281	-0.425951	0.0478882			0.0647173	-0.726729	0.10271			6.92037e-05	-0.854827	0.123536			-0.0709224	-0.920462	0.132559
-0.0730856	-0.993005	0.166643			-0.00105751	-0.0294056	0.00857864			0.0544716	-0.0713846	0.0263115			0.0194894	-0.0399003	0.002494			0.221233	-0.085257	0.0173902			0.0566662	-0.129254	0.0212713			-0.0709448	-0.423154	0.0464967			0.0530849	-0.724807	0.102022			-0.029188	-0.848382	0.121798			-0.0419918	-0.910431	0.130635
-0.054167	-0.984427	0.164419			0.00364613	-0.0324816	0.00757755			0.0845065	-0.0717465	0.0264695			0.0269491	-0.0391766	0.00196618			0.231518	-0.0849934	0.0162706			0.0494708	-0.128229	0.0221485			-0.0691882	-0.420278	0.0460505			0.0567383	-0.719781	0.101122			-0.0475385	-0.844085	0.120341			-0.0230897	-0.898958	0.129556
-0.0520869	-0.974076	0.162562			-0.00344527	-0.0362815	0.00735419			0.0906182	-0.0702989	0.0261442			0.0281391	-0.0384528	0.00165676			0.219782	-0.0869261	0.0153142			0.061601	-0.130876	0.0226485			-0.069841	-0.418491	0.0454678			0.0308206	-0.710245	0.100129			-0.0608153	-0.835722	0.119201			-0.0408207	-0.891597	0.128707
-0.0573535	-0.965957	0.16064			-0.015699	-0.0343816	0.00713712			0.0874654	-0.0669515	0.0251027			0.0243726	-0.0430669	0.00190162			0.207142	-0.084642	0.0143381			0.0627966	-0.131388	0.0220846			-0.0615982	-0.417247	0.0443464			0.0309022	-0.706992	0.098673			-0.0849941	-0.826437	0.117195			-0.0561758	-0.887989	0.127603
-0.0576056	-0.956635	0.158675			0.022157	-0.0321198	0.00666981			0.0661293	-0.0665896	0.0246922			0.0285287	-0.0416193	0.00213994			0.210929	-0.0864869	0.0134451			0.0679121	-0.127631	0.0223742			-0.073289	-0.411186	0.0435965			0.00562074	-0.704405	0.0973529			-0.114897	-0.819225	0.115709			-0.0605007	-0.881567	0.126281
-0.0710027	-0.945519	0.1571			0.00973959	-0.0322102	0.00660548			0.0376456	-0.0661372	0.025283			0.0193523	-0.0362815	0.00171067			0.231089	-0.0851691	0.0129221			0.0575896	-0.128144	0.0221535			-0.0486211	-0.407611	0.043247			-0.00553005	-0.696199	0.0959755			-0.106055	-0.813317	0.114286			-0.0706845	-0.873196	0.125197
-0.0716081	-0.937466	0.15554			-0.0198968	-0.031396	0.00623293			0.0491266	-0.065323	0.0255163			2.05229e-05	-0.0370957	0.00160727			0.226256	-0.0842906	0.0119304			0.0455009	-0.128314	0.0216992			-0.0446215	-0.403803	0.0429353			-0.00297803	-0.693834	0.0951346			-0.104852	-0.806411	0.112587			-0.063682	-0.865402	0.123854
-0.0689003	-0.930529	0.153863			-0.0184337	-0.029858	0.00612645			0.0364513	-0.0661372	0.0247862			-0.0189168	-0.0393575	0.00248031			0.190143	-0.0858719	0.011259			0.0391729	-0.128656	0.0216972			-0.023029	-0.402948	0.0418665			0.0255352	-0.690951	0.0937934			-0.0908956	-0.799736	0.11062			-0.0359498	-0.857176	0.122203
-0.0663008	-0.91939	0.151796			-0.0372962	-0.0328435	0.00565817			0.0390676	-0.065142	0.0242298			-0.0146863	-0.0363719	0.00299192			0.174873	-0.0856084	0.0105564			0.0404286	-0.124473	0.0214395			-0.0438875	-0.400384	0.0407735			-0.00516834	-0.683559	0.0926076			-0.0991151	-0.793137	0.109032			-0.0389864	-0.851042	0.120514
-0.0560204	-0.905669	0.149512			-0.024807	-0.0309436	0.00512109			0.00165442	-0.0647801	0.0248704			-0.0427836	-0.0350149	0.00284957			0.199079	-0.0861355	0.00996332			0.0193722	-0.126095	0.0211345			-0.043064	-0.395876	0.039799			0.0181356	-0.673284	0.0919112			-0.0920402	-0.782855	0.10791			-0.0314538	-0.843537	0.11861
-0.0599122	-0.897354	0.147326			-0.012859	-0.0254248	0.00498184			0.0118837	-0.0641468	0.0256158			-0.0183353	-0.0339292	0.00341869			0.184372	-0.0825336	0.00927495			-0.00448272	-0.124046	0.0210478			-0.0350211	-0.386939	0.0391293			0.0195104	-0.670031	0.0906129			-0.0755576	-0.775873	0.106559			-0.0184719	-0.836609	0.11639
-0.052774	-0.888469	0.145651			-0.0488551	-0.0241582	0.0047171			-0.000328721	-0.0648706	0.0265151			-0.0294004	-0.0345625	0.00366571			0.17937	-0.0820944	0.00845895			-0.0157276	-0.119692	0.0206078			-0.0223692	-0.382898	0.0384794			0.0267985	-0.664191	0.0892554			-0.0670071	-0.770118	0.105384			-0.0212946	-0.825497	0.114839
-0.0459299	-0.878469	0.143395			-0.0878014	-0.0245201	0.0044271			-0.00690746	-0.0678562	0.0264858			-0.0421811	-0.0294056	0.00403937			0.169856	-0.079986	0.00898515			-0.0145914	-0.117557	0.0198972			-0.0554397	-0.378935	0.037336			0.0270562	-0.652585	0.0880024			-0.0778154	-0.764517	0.104468			-0.05931	-0.812291	0.112849
-0.0586876	-0.868687	0.141071			-0.0940656	-0.0258772	0.0051374			0.0136206	-0.0677657	0.0274074			-0.0571195	-0.0330245	0.00404428			0.17688	-0.0801617	0.00920086			-0.0188614	-0.116362	0.0193504			-0.0327843	-0.377147	0.0362137			0.0312224	-0.646154	0.0864678			-0.0700881	-0.75623	0.103573			-0.050478	-0.805075	0.110947
-0.0493608	-0.859124	0.139009			-0.112992	-0.0253344	0.00541666			0.0140494	-0.0667705	0.0284808			-0.0481676	-0.0368243	0.00348668			0.173096	-0.0777019	0.0090506			-0.0348094	-0.11713	0.0184574			-0.034022	-0.371707	0.0353966			0.0248639	-0.641719	0.0853632			-0.0806617	-0.750782	0.102428			-0.0496389	-0.797425	0.109157
-0.044819	-0.848883	0.136849			-0.0901427	-0.028139	0.00607359			0.0309634	-0.0631516	0.0279165			-0.0751542	-0.0341101	0.0036442			0.165834	-0.0769113	0.00905491			-0.0190821	-0.114484	0.0175163			-0.00990821	-0.367822	0.0344687			-0.0130867	-0.629965	0.0839551			-0.0907767	-0.743033	0.101194			-0.0531213	-0.788117	0.107171
-0.0429109	-0.838445	0.134669			-0.0820933	-0.0269628	0.00614539			0.02361	-0.0660467	0.0277945			-0.0650517	-0.0313055	0.00385185			0.177182	-0.0741879	0.00928969			0.000676018	-0.112691	0.0166541			-0.0328531	-0.360439	0.0336599			0.0236276	-0.624051	0.0823976			-0.0839361	-0.735973	0.100569			-0.0632734	-0.778302	0.105182
-0.031819	-0.832602	0.13239			-0.0505162	-0.0245201	0.0072781			0.0336438	-0.0677657	0.027019			-0.0530672	-0.0331149	0.00361818			0.212981	-0.0724309	0.00948071			-0.0302333	-0.113203	0.0159113			-0.0133304	-0.354999	0.0328573			0.0484035	-0.622425	0.0813763			-0.0755435	-0.729298	0.100442			-0.0654162	-0.771231	0.103154
-0.0211264	-0.826912	0.13009			-0.0436539	-0.0275962	0.00868222			0.0514288	-0.0645992	0.0263714			-0.0740475	-0.0359196	0.004323			0.220145	-0.0720795	0.00889559			-0.0387536	-0.112093	0.0158569			0.0149038	-0.356709	0.0324544			0.0442921	-0.619616	0.0800022			-0.0935802	-0.725385	0.0989708			-0.0518893	-0.761922	0.101619
-0.0244618	-0.81678	0.127559			-0.0219745	-0.0292247	0.0100719			0.0529324	-0.0641468	0.0254197			-0.0948443	-0.0363719	0.00530405			0.212524	-0.0745393	0.00910317			-0.026329	-0.111666	0.0159502			0.0279969	-0.354533	0.0317133			0.0396638	-0.610893	0.0788755			-0.0992126	-0.716868	0.0979479			-0.0646434	-0.754056	0.100505
-0.0256641	-0.807371	0.125179			-0.0585522	-0.0289532	0.0103234			0.0697057	-0.061885	0.0247073			-0.0902882	-0.0351053	0.00643318			0.193676	-0.0744515	0.0101909			-0.0587971	-0.112691	0.0152639			0.0569777	-0.351735	0.0310652			0.00197102	-0.606754	0.0778767			-0.0848019	-0.709041	0.0969713			-0.0770544	-0.751242	0.0990978
-0.0351811	-0.801528	0.122934			-0.0475749	-0.0271438	0.0103554			0.0895137	-0.0606184	0.0240858			-0.118991	-0.0361005	0.0069658			0.192832	-0.0701468	0.011605			-0.0428447	-0.111496	0.0156344			0.0729307	-0.347927	0.0306717			-0.000743406	-0.605793	0.0772209			-0.0831435	-0.702212	0.0965586			-0.0699112	-0.745757	0.0978366
-0.0201512	-0.793519	0.120605			-0.0713259	-0.0277771	0.0108724			0.088305	-0.0594423	0.0234741			-0.104483	-0.0334768	0.00728996			0.223788	-0.0707618	0.012863			-0.0498969	-0.110471	0.0155248			0.0714409	-0.344119	0.0304083			-0.00884998	-0.601431	0.0760662			-0.0813091	-0.696381	0.0957034			-0.0749278	-0.738036	0.0965687
-0.0276262	-0.784634	0.118388			-0.0783352	-0.0272343	0.0109537			0.087034	-0.0625183	0.0229451			-0.0959466	-0.029677	0.00779942			0.244088	-0.0705861	0.0128389			-0.0430172	-0.107654	0.0156378			0.0624086	-0.342021	0.0298435			-0.026887	-0.596109	0.0749119			-0.124683	-0.691547	0.0939841			-0.0929386	-0.730098	0.0947194
-0.016799	-0.777588	0.116353			-0.0628655	-0.0242487	0.0103047			0.0846979	-0.060528	0.0222493			-0.0882111	-0.0333864	0.00880439			0.251464	-0.0710253	0.013442			-0.0419064	-0.111581	0.0149899			0.0508355	-0.341166	0.0296252			-0.0488007	-0.59293	0.0741235			-0.151342	-0.6828	0.0925424			-0.088862	-0.725119	0.0934447
-0.0157059	-0.769425	0.114423			-0.0343842	-0.0258772	0.0101161			0.0928919	-0.057271	0.0216238			-0.0744717	-0.0325721	0.0088047			0.255151	-0.0695319	0.0139593			-0.0574953	-0.108593	0.0140286			0.0305849	-0.339223	0.0301716			-0.0432508	-0.588569	0.0739441			-0.134778	-0.675357	0.0910243			-0.115445	-0.718191	0.0913225
-0.0141594	-0.756383	0.112582			-0.0445549	-0.0266914	0.0097165			0.0850009	-0.0587185	0.0208499			-0.065922	-0.0297675	0.00933741			0.257517	-0.0690926	0.014582			-0.0473152	-0.107398	0.0137155			0.0286928	-0.333473	0.0302073			-0.0674848	-0.579624	0.0729766			-0.131516	-0.669526	0.0894855			-0.140097	-0.710542	0.0894021
-0.0203455	-0.747827	0.110627			-0.0546766	-0.0193632	0.00945004			0.103229	-0.0592613	0.0199723			-0.0832679	-0.0269629	0.00948937			0.263602	-0.0681263	0.0142317			-0.04994	-0.105861	0.0127946			0.0408848	-0.325857	0.0302607			-0.0543843	-0.574671	0.0722781			-0.110418	-0.659704	0.0877985			-0.113386	-0.703975	0.0878643
-0.0266041	-0.742334	0.108863			-0.0640547	-0.0182775	0.00881777			0.0786084	-0.0602565	0.02018			-0.0815582	-0.0285913	0.00949269			0.270661	-0.0667207	0.0135462			-0.0232409	-0.102617	0.0118748			0.0658588	-0.322204	0.0303306			-0.0623923	-0.568536	0.0717627			-0.114204	-0.655024	0.0861447			-0.121435	-0.69546	0.0864654
-0.0430196	-0.733252	0.107291			-0.0736253	-0.019906	0.00889705			0.0892717	-0.0607994	0.020643			-0.0748508	-0.0287723	0.00958662			0.274184	-0.0671599	0.0133429			-0.00554412	-0.10108	0.0116399			0.0541102	-0.320261	0.0301726			-0.0522572	-0.562622	0.0717304			-0.12626	-0.650497	0.0844146			-0.121932	-0.682543	0.08466
-0.0588017	-0.722683	0.105613			-0.099678	-0.0223488	0.0088306			0.0914633	-0.0635135	0.0209135			-0.0511624	-0.0268724	0.0089812			0.289209	-0.0664571	0.0130109			-0.00861491	-0.0992869	0.0112288			0.0639968	-0.317697	0.0304019			-0.046475	-0.551016	0.0716481			-0.143077	-0.644589	0.0825956			-0.0889184	-0.673306	0.0826821
-0.0663009	-0.714717	0.103718			-0.0768394	-0.0226202	0.00827664			0.116406	-0.0600756	0.0207523			-0.0143328	-0.0322102	0.00812036			0.272708	-0.0639974	0.0131858			-0.0347454	-0.100482	0.0109168			0.0422562	-0.312646	0.0302963			-0.0548335	-0.547542	0.0705398			-0.14685	-0.636762	0.0814181			-0.0802113	-0.669698	0.0811008
-0.0704385	-0.707693	0.101999			-0.0604616	-0.0219869	0.00774009			0.123588	-0.0594423	0.0205772			-0.0123213	-0.0323912	0.00793584			0.24704	-0.0587264	0.0131796			-0.0298756	-0.0960427	0.0104173			0.0316631	-0.30876	0.0301197			-0.0682616	-0.541259	0.069714			-0.146648	-0.62932	0.080166			-0.104623	-0.662843	0.0796125
-0.0632816	-0.698699	0.100337			-0.067297	-0.0211726	0.00670584			0.156548	-0.0625183	0.0201703			-0.00446641	-0.0271438	0.00723122			0.248681	-0.0574965	0.0132032			-0.0157396	-0.0952743	0.010374			0.0499865	-0.305185	0.0301845			-0.0851821	-0.53394	0.0689268			-0.143893	-0.626174	0.0785166			-0.128793	-0.651586	0.0784376
-0.0470062	-0.692484	0.0984965			-0.0695693	-0.0212631	0.0059579			0.117367	-0.0610708	0.0194119			0.0114756	-0.0291342	0.00662552			0.220312	-0.0587264	0.0129803			-0.00265373	-0.0950182	0.0101109			0.0389657	-0.300755	0.0301336			-0.0815775	-0.530835	0.0675007			-0.148835	-0.619575	0.0767722			-0.138806	-0.645235	0.0771982
-0.0380299	-0.68918	0.0966389			-0.0605399	-0.0237059	0.00557887			0.109481	-0.0612517	0.018427			0.0303854	-0.0322102	0.00639245			0.223036	-0.0574086	0.0127705			-0.00605178	-0.0971525	0.00912567			0.0520914	-0.302776	0.0296312			-0.0940426	-0.528396	0.0663546			-0.15018	-0.613743	0.0749997			-0.111065	-0.639102	0.0759773
-0.039157	-0.681499	0.0952084			-0.0595757	-0.0269629	0.00478233			0.0906508	-0.0598946	0.0180849			0.00937231	-0.0317579	0.00599249			0.240346	-0.0574086	0.012608			0.00633082	-0.0915178	0.0087647			0.0320242	-0.301455	0.0296814			-0.051023	-0.523369	0.0651069			-0.163426	-0.604996	0.074069			-0.132507	-0.632174	0.0754676
-0.0575457	-0.671345	0.0939292			-0.0353049	-0.0262391	0.00380085			0.100161	-0.0561853	0.0182634			0.014873	-0.031215	0.00555443			0.264639	-0.0590778	0.0125394			-0.0297492	-0.0930545	0.00780702			0.0259356	-0.29788	0.0291541			-0.0325752	-0.517603	0.0641621			-0.143044	-0.599395	0.0730373			-0.141365	-0.630442	0.0742918
-0.0568989	-0.666575	0.0925168			-0.0117216	-0.0237059	0.00334694			0.0741884	-0.0549187	0.0182158			0.010113	-0.0291342	0.00521547			0.257065	-0.0559152	0.0117826			-0.0365267	-0.0935668	0.00783156			0.00718813	-0.294461	0.029015			-0.0214855	-0.517012	0.0631422			-0.161748	-0.593564	0.0713146			-0.146541	-0.627628	0.0730192
-0.0748244	-0.661148	0.090856			0.0130357	-0.0217155	0.00350069			0.0626689	-0.0556425	0.0174561			-0.00478003	-0.0328435	0.00489073			0.284824	-0.0564423	0.0106436			-0.0192479	-0.0939083	0.00734487			0.0143414	-0.292207	0.0283277			-0.0337506	-0.515977	0.0611675			-0.182774	-0.585737	0.0694421			-0.138226	-0.61969	0.0717596
-0.0682854	-0.654145	0.089327			0.0212707	-0.0234344	0.00372214			0.0785491	-0.0575424	0.0170484			-0.00450858	-0.0275057	0.00486803			0.290795	-0.0574086	0.00951784			0.00845443	-0.0898103	0.00662177			0.02963	-0.292207	0.0279131			-0.000501915	-0.511024	0.0598137			-0.196729	-0.583435	0.0677212			-0.143257	-0.610381	0.0705332
-0.0722677	-0.645479	0.0877242			0.00222373	-0.023163	0.00326921			0.0759323	-0.0560948	0.016726			0.0101986	-0.0304008	0.00483761			0.283271	-0.0586385	0.00878004			0.0292549	-0.0928838	0.00587268			0.0434687	-0.290808	0.0277175			0.0386427	-0.505554	0.0590201			-0.215945	-0.5763	0.0665921			-0.157832	-0.607639	0.0696712
-0.0883027	-0.639352	0.0858312			-0.00129804	-0.0244296	0.00380207			0.0683292	-0.0543759	0.0169594			0.00256254	-0.0313055	0.00618239			0.273966	-0.056618	0.00820655			0.0332568	-0.0910055	0.00553747			0.0219168	-0.289098	0.027249			0.0527591	-0.501193	0.0577019			-0.212461	-0.567552	0.06513			-0.152888	-0.605618	0.0687408
-0.0876474	-0.629351	0.0840036			-0.0126519	-0.0205393	0.00475803			0.0528673	-0.0543759	0.0169421			-0.0109241	-0.0276866	0.00711129			0.251356	-0.0539825	0.0080414			0.0242393	-0.0869075	0.00516436			0.0209945	-0.284125	0.0268104			0.0449974	-0.496536	0.0561713			-0.211116	-0.561414	0.0637536			-0.165126	-0.595155	0.0676602
-0.0876165	-0.620248	0.0824274			-0.00865358	-0.0175538	0.00623202			0.0397597	-0.0580852	0.016099			-0.00555734	-0.023163	0.00778675			0.240199	-0.055476	0.0071065			0.0327482	-0.0849439	0.00476752			0.0145122	-0.279384	0.026391			0.0620002	-0.489439	0.0550649			-0.212799	-0.558038	0.0624036			-0.163417	-0.588083	0.0667028
-0.0833278	-0.616046	0.0806238			-0.00570878	-0.0144777	0.00665044			0.0483574	-0.0577233	0.0159016			0.0189691	-0.0258772	0.00885298			0.252647	-0.0550367	0.00679162			0.0544856	-0.0852854	0.00434584			0.0152073	-0.275266	0.0260943			0.0456697	-0.484856	0.0545939			-0.225726	-0.553051	0.0607837			-0.148919	-0.584331	0.0657813
-0.0830704	-0.609963	0.0788493			-0.0112167	-0.0175538	0.00585862			0.0284336	-0.0557329	0.0162585			0.0222657	-0.0273247	0.00943868			0.271764	-0.0538068	0.00653657			0.0581012	-0.0813582	0.0038136			0.00680717	-0.273634	0.0256761			0.0521282	-0.479164	0.0542539			-0.211053	-0.546452	0.0592918			-0.191693	-0.570908	0.0645629
-0.0854496	-0.599525	0.0770426			-0.00260348	-0.0192727	0.00692076			0.0477505	-0.0569995	0.0167437			0.00590896	-0.0270533	0.0103321			0.25278	-0.053719	0.00646123			0.0727472	-0.0798214	0.0034775			0.0243781	-0.271846	0.0256511			0.0653201	-0.468593	0.0532662			-0.217584	-0.542615	0.0582989			-0.203942	-0.564414	0.0634311
-0.0798058	-0.591515	0.0753273			0.0275228	-0.0194537	0.00804484			0.0728501	-0.0569091	0.0172904			-0.000206674	-0.0288628	0.0115105			0.263573	-0.0511713	0.00651084			0.0693596	-0.0812728	0.00306711			0.032976	-0.268582	0.0255774			0.0901459	-0.460683	0.0525008			-0.233463	-0.536477	0.0569054			-0.204338	-0.560373	0.0623977
-0.0805447	-0.586439	0.0736174			0.00824389	-0.0192727	0.00774005			0.105977	-0.0561853	0.0169514			-0.00416158	-0.0304913	0.0118238			0.281804	-0.0464274	0.0068351			0.0639741	-0.0802483	0.00220999			0.0446507	-0.262132	0.0257941			0.106903	-0.458022	0.0524369			-0.244561	-0.52796	0.0562951			-0.191117	-0.554888	0.0618988
-0.0743641	-0.58123	0.0717816			0.0172333	-0.018368	0.00761034			0.0792375	-0.0573614	0.0169412			0.0140931	-0.0270533	0.0131444			0.269743	-0.0468667	0.0071349			0.0553764	-0.0760649	0.00186214			0.0139313	-0.259801	0.0255556			0.0688799	-0.456174	0.0517836			-0.218391	-0.527346	0.0554192			-0.181018	-0.545579	0.0610737
-0.0709311	-0.575038	0.0699699			0.0180034	-0.0204489	0.00914356			0.0785425	-0.0578138	0.0171084			0.0056366	-0.0257867	0.0135811			0.246061	-0.0488872	0.00728606			0.068089	-0.0736744	0.00165143			0.0231232	-0.258713	0.0250881			0.0972576	-0.452108	0.0505447			-0.222277	-0.521745	0.0544242			-0.204362	-0.538363	0.0605074
-0.0657291	-0.571077	0.0682448			0.0100389	-0.0227107	0.0117656			0.103646	-0.0550092	0.0176146			-0.0296626	-0.0316674	0.0136042			0.23062	-0.0477452	0.00690912			0.0484378	-0.0796507	0.00163616			0.0142931	-0.260422	0.0248471			0.0820664	-0.447895	0.0497394			-0.240063	-0.515223	0.0538868			-0.188431	-0.537425	0.0599425
-0.0665121	-0.565737	0.066638			0.000860648	-0.023163	0.0139574			0.114152	-0.0512998	0.0179171			-0.0260707	-0.0328435	0.0142857			0.23749	-0.047833	0.00705141			0.0670657	-0.0739305	0.00102746			-0.0022536	-0.260189	0.0249125			0.0599347	-0.447747	0.0495817			-0.2425	-0.509852	0.0531542			-0.208173	-0.531075	0.0592349
-0.0692837	-0.557575	0.0649944			0.0131845	-0.0247011	0.0145073			0.137037	-0.054014	0.0174056			-0.0339511	-0.0300389	0.0159629			0.251546	-0.0472181	0.00688845			0.0719094	-0.0755527	0.000210322			0.000772184	-0.257858	0.0246436			0.0503175	-0.442129	0.0491157			-0.237508	-0.504097	0.0532119			-0.222127	-0.527322	0.0585795
-0.0741127	-0.552979	0.0635547			0.0278263	-0.0224393	0.0149867			0.125432	-0.0526569	0.0172495			-0.0330083	-0.0288628	0.016931			0.220143	-0.0473938	0.00668765			0.0613916	-0.0771748	0.000391141			0.00289806	-0.253117	0.0237628			0.0603142	-0.439024	0.0485008			-0.23238	-0.498726	0.0541151			-0.199448	-0.525735	0.057896
-0.0751838	-0.549981	0.0623214			0.0100107	-0.0191823	0.0162905			0.111577	-0.0515712	0.0170041			-0.0421924	-0.0314865	0.0166861			0.213496	-0.0454611	0.00694162			0.0621527	-0.0751258	0.0013817			0.00678834	-0.250864	0.0233675			0.0711964	-0.438507	0.0475904			-0.212452	-0.491514	0.0536473			-0.194541	-0.520467	0.0569289
-0.0869057	-0.544336	0.061282			0.00824534	-0.0217155	0.0170743			0.097277	-0.0511189	0.0173223			-0.0541193	-0.0275962	0.0168956			0.202659	-0.04959	0.0072722			0.0266179	-0.0749551	0.00143122			0.0153395	-0.252729	0.0233209			0.0560134	-0.437546	0.0473264			-0.203118	-0.490056	0.0533591			-0.187847	-0.514911	0.0558548
-0.0714761	-0.535976	0.0605179			-0.0102536	-0.0222583	0.0172328			0.108172	-0.0519331	0.0171732			-0.0567096	-0.0270533	0.0172577			0.203053	-0.0494143	0.00727867			-0.0110984	-0.0748697	0.00132748			0.0146977	-0.251952	0.0231032			0.0581795	-0.429932	0.0464112			-0.173599	-0.483227	0.0532448			-0.189428	-0.510148	0.0548815
-0.0625134	-0.529017	0.0597454			-0.00883309	-0.0229821	0.0174345			0.135686	-0.0484047	0.0168928			-0.0523956	-0.0307627	0.0176087			0.19302	-0.0487115	0.00792312			-0.0307132	-0.0732475	0.001873			0.0260687	-0.248532	0.0222097			0.043726	-0.424314	0.0459045			-0.176993	-0.474326	0.0523495			-0.16968	-0.508344	0.0538596
-0.0694435	-0.523306	0.0591003			-0.0113682	-0.0171919	0.0182301			0.127573	-0.0477714	0.0164791			-0.0399506	-0.0287723	0.0171421			0.182887	-0.0457246	0.00815056			-0.0185341	-0.0712839	0.00371432			0.0436658	-0.243792	0.0213966			0.0591043	-0.423205	0.0450549			-0.16692	-0.470106	0.0520362			-0.142663	-0.502643	0.0524026
-0.0607488	-0.515887	0.058542			-0.0319399	-0.0157443	0.0191746			0.135079	-0.052295	0.0162804			-0.0198614	-0.0236154	0.016876			0.168831	-0.0462517	0.00869665			-0.0403154	-0.0668444	0.00476426			0.0509629	-0.241771	0.0201277			0.071137	-0.416552	0.0438353			-0.16398	-0.46696	0.0516889			-0.13255	-0.494994	0.0511598
-0.0630505	-0.510351	0.0581527			-0.0347285	-0.0147491	0.0191979			0.106434	-0.0509379	0.0158036			-0.0192482	-0.023163	0.0170711			0.181941	-0.0464274	0.00854195			-0.0366879	-0.0688934	0.00416869			0.049547	-0.235865	0.0197986			0.0851022	-0.409677	0.0425126			-0.169589	-0.461743	0.0513711			-0.150522	-0.486984	0.0499456
-0.0529037	-0.506872	0.0580946			0.00259175	-0.0144777	0.0189163			0.081079	-0.0508475	0.0148991			-0.00821867	-0.0267819	0.0168199			0.145779	-0.0451097	0.00822869			-0.0396633	-0.0666737	0.00387261			0.0372051	-0.237186	0.0189673			0.0763079	-0.404798	0.0417424			-0.173819	-0.45829	0.0497689			-0.137786	-0.481355	0.0488324
-0.060252	-0.499913	0.0577613			0.014817	-0.0188204	0.0192934			0.084608	-0.0506665	0.0142392			0.0222863	-0.0261486	0.0169			0.157601	-0.0441433	0.00854522			-0.0554986	-0.0636856	0.00392853			0.0668676	-0.236798	0.0185085			0.0933002	-0.399402	0.0413501			-0.196921	-0.452842	0.0488067			-0.132906	-0.475077	0.0474717
-0.0465168	-0.491006	0.057639			0.0309056	-0.0201775	0.019811			0.0618401	-0.0510284	0.0132399			0.0571995	-0.0256962	0.0169124			0.160804	-0.043177	0.00828249			-0.0678583	-0.0651369	0.00353759			0.0489383	-0.23229	0.0183812			0.0912178	-0.389792	0.0404081			-0.203497	-0.448008	0.0479652			-0.122236	-0.469737	0.0460197
-0.0480614	-0.488074	0.0577534			0.0177617	-0.0174633	0.0197592			0.0611297	-0.0528378	0.0132563			0.0675111	-0.0278676	0.0169247			0.150396	-0.0401901	0.0074015			-0.0678962	-0.0637709	0.00309196			0.0345478	-0.22685	0.0179422			0.101779	-0.388018	0.039243			-0.19113	-0.441256	0.0471279			-0.13116	-0.468222	0.0448626
-0.049176	-0.485448	0.0579101			-0.00656925	-0.0179157	0.0187469			0.0645204	-0.0512998	0.0130075			0.0489709	-0.0266914	0.0171041			0.167709	-0.0405415	0.00697644			-0.0384238	-0.0629172	0.00282059			0.0271678	-0.224985	0.0177263			0.116625	-0.389422	0.0387729			-0.207666	-0.440565	0.0461093			-0.135539	-0.460717	0.0435329
-0.0451407	-0.481815	0.0582376			-0.0316016	-0.0202679	0.0186393			0.0344351	-0.0522045	0.0128639			0.0552922	-0.0267819	0.0163392			0.17521	-0.0398387	0.00700506			-0.0266591	-0.0614658	0.00225673			0.00893554	-0.226073	0.0173238			0.100689	-0.382769	0.0383049			-0.205201	-0.438263	0.0449993			-0.14479	-0.453284	0.042036
-0.0476922	-0.477242	0.058838			0.0100809	-0.0213536	0.0182745			0.0517471	-0.0484952	0.0128333			0.05752	-0.0270533	0.0165584			0.163798	-0.0429135	0.00649885			-0.0196309	-0.0641978	0.00187758			-0.0168963	-0.225451	0.0173135			0.0800293	-0.377964	0.0377188			-0.193862	-0.43036	0.0452951			-0.144381	-0.452129	0.0408928
-0.0522105	-0.474156	0.0595048			-0.013846	-0.0219869	0.0173102			0.0391165	-0.0471381	0.0124165			0.0724604	-0.029677	0.0163377			0.117965	-0.0415079	0.00620123			-0.0216523	-0.0635148	0.00164682			-0.0216477	-0.225995	0.017719			0.0791842	-0.378925	0.0364839			-0.142717	-0.425756	0.0448235			-0.141328	-0.450037	0.0397146
-0.0348586	-0.469539	0.059937			0.00607345	-0.0221678	0.0166504			0.0612347	-0.0475	0.0128372			0.0736255	-0.0292247	0.0161468			0.113487	-0.0393116	0.00592483			-0.0162166	-0.0641978	0.00150306			-0.00299369	-0.224053	0.0186795			0.110904	-0.376116	0.0362568			-0.145709	-0.419465	0.0438183			-0.132647	-0.447367	0.0385408
-0.0311505	-0.464309	0.0604147			0.00265823	-0.0213536	0.0160149			0.0889465	-0.0468667	0.0127113			0.0550093	-0.0234344	0.0162151			0.0838738	-0.0400144	0.00607399			-0.0138356	-0.0649662	0.00197077			0.0208672	-0.220711	0.0190568			0.118003	-0.373085	0.035417			-0.140281	-0.417239	0.0436628			-0.123459	-0.443037	0.0369432
-0.0335397	-0.461792	0.0610671			-0.0211763	-0.0179157	0.0155615			0.0961613	-0.0463238	0.0122819			0.0303701	-0.024882	0.0156706			0.0607012	-0.0410686	0.00646836			-0.017022	-0.0636002	0.00240574			0.0224119	-0.219312	0.0195296			0.125014	-0.375525	0.0345221			-0.178862	-0.412866	0.042658			-0.11112	-0.440511	0.0357211
-0.0358245	-0.459276	0.0616922			-0.0474945	-0.0176442	0.0153036			0.126296	-0.045962	0.0123332			0.0183912	-0.0274152	0.0151088			0.0587346	-0.0422985	0.00669928			-0.0189301	-0.0618927	0.00219962			0.0110041	-0.221022	0.0203713			0.11238	-0.372272	0.0345424			-0.187822	-0.409183	0.0417672			-0.0988113	-0.43712	0.0353151
-0.0411064	-0.450829	0.0618701			-0.0417507	-0.023163	0.0150533			0.115056	-0.0445144	0.0125291			0.0138191	-0.0226202	0.014827			0.052444	-0.0417714	0.00690497			0.003595	-0.0618073	0.00232264			0.0127376	-0.221721	0.0209715			0.123309	-0.366432	0.0341564			-0.153189	-0.403735	0.0406703			-0.109751	-0.431202	0.0351471
-0.0271795	-0.444942	0.0620379			-0.0620994	-0.0182775	0.0150907			0.0733786	-0.0472286	0.0130325			0.00135087	-0.0227107	0.0139987			0.0339354	-0.0415957	0.00718931			-0.000973792	-0.0632587	0.00261145			0.0235361	-0.217369	0.0218116			0.125018	-0.36074	0.0340785			-0.163189	-0.395755	0.0391526			-0.109099	-0.429543	0.0343639
-0.0335774	-0.441266	0.062249			-0.0387237	-0.0141158	0.0155043			0.0773892	-0.0453287	0.0132172			0.0257142	-0.023163	0.0133204			0.0692646	-0.0401901	0.00838638			0.0121474	-0.0599291	0.00240087			0.0246498	-0.210841	0.0223565			0.134087	-0.359114	0.0335821			-0.184459	-0.392686	0.0384366			-0.0849908	-0.428677	0.0342281
-0.0450505	-0.437021	0.062867			-0.0450572	-0.015111	0.0151489			0.0825855	-0.0472286	0.0147249			0.053404	-0.0213536	0.0124903			0.0683914	-0.0392238	0.00896261			0.0221181	-0.0589899	0.00240418			0.0167956	-0.209287	0.0231983			0.129416	-0.353496	0.0331455			-0.183658	-0.38931	0.0384015			-0.0967794	-0.4211	0.0346608
-0.0460343	-0.431462	0.0632981			-0.0410424	-0.0140254	0.0145475			0.0748997	-0.0472286	0.0167567			0.0692448	-0.0182775	0.0119916			0.0879974	-0.040278	0.00918589			0.0169549	-0.0577947	0.00288576			0.01209	-0.208044	0.0236524			0.115276	-0.348174	0.0328833			-0.184963	-0.388082	0.0377819			-0.0942566	-0.41244	0.0354381
-0.0447274	-0.427283	0.0633314			-0.0548367	-0.0156539	0.0144805			0.0497044	-0.0479523	0.017429			0.0687512	-0.0215345	0.011464			0.114708	-0.0401023	0.00939862			-0.000239507	-0.0581362	0.00356316			-0.000727009	-0.206956	0.0226215			0.0632691	-0.34603	0.0325798			-0.181012	-0.383172	0.0369019			-0.0999561	-0.409049	0.0355769
-0.0636072	-0.42411	0.0634159			-0.01773	-0.0160157	0.0144203			0.0447434	-0.0463238	0.0173663			0.0847875	-0.0245201	0.0105798			0.0798305	-0.0382574	0.00958877			0.00194283	-0.0561726	0.00430258			-0.0342653	-0.207811	0.022015			0.0406138	-0.337972	0.0320205			-0.178552	-0.378261	0.0386826			-0.100658	-0.405657	0.0360172
-0.065145	-0.418092	0.0633461			-0.0159078	-0.018368	0.0134408			0.0149039	-0.0474095	0.0177541			0.0458798	-0.0202679	0.00991898			0.0763517	-0.0348313	0.00973959			0.00387959	-0.0546358	0.00484706			-0.0407244	-0.202215	0.0220256			0.0311104	-0.331541	0.0317789			-0.194523	-0.374348	0.0386844			-0.102336	-0.39909	0.0372686
-0.0699506	-0.414022	0.0630455			-0.0277751	-0.0139349	0.0128661			0.0340028	-0.0489475	0.0193441			0.0224349	-0.0197251	0.00965352			0.0737411	-0.0330743	0.00969303			0.0328248	-0.0550627	0.00526284			-0.0449807	-0.198019	0.02256			0.035163	-0.327402	0.0316544			-0.18587	-0.371279	0.0389244			-0.0883509	-0.394977	0.0387298
-0.0695793	-0.414219	0.0625588			-0.038028	-0.0122159	0.0123392			0.0124042	-0.0481333	0.0208217			0.010709	-0.0209917	0.00982058			0.070563	-0.0338649	0.00960134			0.051938	-0.0568556	0.00643487			-0.0308786	-0.19662	0.0224873			0.0370202	-0.329915	0.0309102			-0.169597	-0.36936	0.0388191			-0.0729377	-0.393606	0.0402974
-0.0623584	-0.411417	0.0619594			-0.0723214	-0.0180061	0.0131586			0.0209557	-0.0451477	0.0210253			0.0114058	-0.0213536	0.00967004			0.111002	-0.0329864	0.00759049			0.0738743	-0.0549773	0.00689047			-0.0365837	-0.198718	0.0222898			0.0354476	-0.326588	0.0303288			-0.136565	-0.367596	0.038588			-0.0852457	-0.38841	0.0405816
-0.0665637	-0.407303	0.0615186			-0.0719831	-0.0198156	0.0127031			-0.00395535	-0.045781	0.0219917			0.00190172	-0.0225297	0.00905757			0.114484	-0.0365004	0.00736539			0.0919676	-0.0548919	0.00688622			-0.0510393	-0.199262	0.0218148			0.0337051	-0.320601	0.0297324			-0.128567	-0.361994	0.0388449			-0.100542	-0.384946	0.0416541
-0.0738544	-0.404459	0.0608102			-0.0833856	-0.0194537	0.0116958			0.00364125	-0.0429764	0.0222424			0.00703186	-0.0215345	0.00905924			0.118822	-0.0354462	0.00698699			0.0812734	-0.0575386	0.00657056			-0.0259846	-0.197475	0.0213976			0.0581667	-0.323262	0.0288378			-0.144701	-0.358004	0.0396997			-0.0814666	-0.385235	0.0420265
-0.0583254	-0.402533	0.0602154			-0.0699378	-0.0180061	0.0114694			0.0230344	-0.0415288	0.023983			0.00646161	-0.0228011	0.00917609			0.12693	-0.0329865	0.00762972			0.120187	-0.0565994	0.007076			-0.0129143	-0.196698	0.0214361			0.0608106	-0.322671	0.0281147			-0.134178	-0.351636	0.0405503			-0.0914514	-0.384946	0.0420947
-0.065569	-0.399688	0.0595397			-0.0852263	-0.0163776	0.0110284			0.00736302	-0.0438811	0.0238143			0.0271324	-0.0196346	0.00904206			0.151432	-0.0342163	0.00773192			0.111328	-0.0576239	0.00722116			0.00861594	-0.193978	0.0214823			0.0444949	-0.321266	0.0272525			-0.134067	-0.350715	0.0410933			-0.083575	-0.379751	0.0421301
-0.0476777	-0.396515	0.0592074			-0.0763886	-0.016649	0.0110342			-0.0128237	-0.0438811	0.02295			0.0431452	-0.0178252	0.00881103			0.132069	-0.035007	0.00814898			0.104547	-0.0569409	0.00693347			0.0104453	-0.194832	0.0213021			0.0505264	-0.319861	0.026721			-0.148103	-0.347339	0.0406183			-0.0845419	-0.378813	0.0415674
-0.0292615	-0.395027	0.058908			-0.0722934	-0.0137539	0.0103687			0.0232206	-0.0413479	0.0233571			0.0667578	-0.0202679	0.0085418			0.172552	-0.0354462	0.00831964			0.112204	-0.0583069	0.00695042			0.0103951	-0.195532	0.0209593			0.066451	-0.319418	0.0264371			-0.126274	-0.344577	0.0411435			-0.0616008	-0.376936	0.0417739
-0.0384723	-0.389928	0.0584323			-0.089483	-0.0171919	0.00976307			-0.00473008	-0.0406241	0.0237171			0.0712367	-0.0214441	0.00803852			0.164173	-0.035007	0.0081847			0.116633	-0.0558311	0.0066973			0.00762607	-0.194133	0.0212282			0.0384568	-0.314539	0.025745			-0.129732	-0.339129	0.0411113			-0.044426	-0.37304	0.0422619
-0.0390149	-0.38216	0.0576118			-0.0841442	-0.0152015	0.00951658			0.00279903	-0.044243	0.022879			0.0622248	-0.0145682	0.00768422			0.197059	-0.0372032	0.00785934			0.0922251	-0.0552334	0.00668457			0.0172943	-0.189703	0.021548			0.0448155	-0.308551	0.0248218			-0.126075	-0.335216	0.0416758			-0.0522842	-0.369504	0.0424913
-0.0378699	-0.379753	0.0568977			-0.0993334	-0.0090494	0.00953609			-0.0126209	-0.0437906	0.0219647			0.0503906	-0.0141158	0.00776706			0.215667	-0.0339528	0.00742227			0.086774	-0.0562579	0.00681333			0.0361942	-0.183953	0.0216638			0.0645965	-0.307812	0.0242759			-0.110807	-0.330535	0.0425846			-0.0582589	-0.367628	0.0424207
-0.0395407	-0.378615	0.0565809			-0.0634499	-0.00977317	0.00995303			-0.00151928	-0.0427955	0.0219523			0.05515	-0.0160157	0.00750329			0.210951	-0.0335135	0.00728924			0.0755615	-0.0539528	0.00661814			0.0631498	-0.181388	0.0213419			0.0349219	-0.304042	0.024279			-0.085971	-0.329691	0.0437544			-0.0604024	-0.361133	0.0425303
-0.0508836	-0.373669	0.0559532			-0.0697848	-0.0111303	0.0101569			0.0128418	-0.0448763	0.0215529			0.0459518	-0.0148396	0.00739255			0.202994	-0.0350948	0.00772006			0.0790611	-0.0490864	0.00651235			0.0623785	-0.182865	0.0210619			0.0225869	-0.29798	0.0241899			-0.0431077	-0.329768	0.0453243			-0.0785321	-0.354061	0.042921
-0.0451836	-0.368352	0.0550717			-0.0973524	-0.0123969	0.010773			-0.0128951	-0.0436097	0.0204888			0.0264441	-0.0132111	0.00741891			0.209382	-0.0338649	0.00861241			0.0668514	-0.0513062	0.00575422			0.0691114	-0.180766	0.0211196			0.0198687	-0.293028	0.023685			-0.0475334	-0.32386	0.0462332			-0.0916328	-0.351247	0.0427164
-0.0437752	-0.366623	0.054434			-0.0935373	-0.0106779	0.0115883			0.00616299	-0.0427955	0.0195862			0.00926342	-0.0162872	0.00709134			0.213891	-0.0327229	0.00923689			0.0778184	-0.0530137	0.00568421			0.0804035	-0.17758	0.0212037			0.0195817	-0.287114	0.0230869			-0.0499396	-0.319103	0.0464925			-0.0830767	-0.351824	0.0432126
-0.048118	-0.363647	0.0534765			-0.102047	-0.0113112	0.0119908			-0.0160935	-0.040986	0.0188866			0.0369258	-0.0154729	0.00748256			0.211296	-0.0289454	0.0099076			0.0419435	-0.0501963	0.00554937			0.0652907	-0.174627	0.0209856			0.0411271	-0.284896	0.0231968			-0.04544	-0.316033	0.0489522			-0.0753659	-0.345762	0.0443879
-0.0403232	-0.358876	0.0525995			-0.0627321	-0.0108588	0.0124989			0.0073283	-0.0447858	0.0185869			0.00656576	-0.0102255	0.00747675			0.21803	-0.0284183	0.0110544			0.0307048	-0.0486596	0.00528387			0.0991806	-0.17284	0.0205771			0.0460647	-0.280904	0.0236283			-0.0462351	-0.312657	0.0501381			-0.0843795	-0.340134	0.0452444
-0.0357068	-0.359182	0.0517439			-0.0678407	-0.0096827	0.0124969			0.00389747	-0.0443335	0.0181912			-9.85909e-05	-0.0114017	0.00793881			0.202113	-0.032108	0.0122462			0.0346888	-0.0524161	0.00515873			0.0955077	-0.170819	0.0207122			0.0588272	-0.283196	0.0237331			-0.0514078	-0.314269	0.0507332			-0.0650125	-0.341216	0.0452834
-0.0599841	-0.35962	0.0508055			-0.059296	-0.0116731	0.0123682			0.020585	-0.0395385	0.0174458			-0.0136294	-0.0160157	0.00863303			0.179646	-0.031493	0.0134904			0.0502086	-0.0533552	0.00557489			0.104283	-0.174472	0.021097			0.0419684	-0.280535	0.0231504			-0.0690894	-0.309742	0.05123			-0.0670722	-0.339412	0.0452424
-0.0627248	-0.35485	0.0499123			-0.0571119	-0.0145682	0.0117483			0.0133604	-0.039448	0.0169591			-0.0303123	-0.0138444	0.00927055			0.133016	-0.0320201	0.0143709			0.0427292	-0.0507939	0.00596178			0.0801851	-0.174316	0.0209753			0.0276532	-0.278835	0.0229379			-0.0521062	-0.306519	0.0529725			-0.0670738	-0.334361	0.045478
-0.0547299	-0.351151	0.0491337			-0.041674	-0.0126683	0.0117892			0.0303937	-0.0395385	0.0174221			-0.0517296	-0.0131206	0.00963669			0.13405	-0.0312295	0.0152876			0.0574205	-0.0527576	0.006117			0.0825847	-0.172995	0.020535			0.0298561	-0.275878	0.0229838			-0.039263	-0.30345	0.0544958			-0.0524793	-0.334794	0.0456347
-0.0380191	-0.349838	0.0481545			-0.0488974	-0.010316	0.0119066			0.0121602	-0.0378195	0.017963			-0.024159	-0.0134825	0.00974687			0.166711	-0.0289454	0.0161569			0.0866477	-0.0548066	0.00578868			0.126607	-0.171674	0.0202082			0.0342398	-0.277208	0.0227741			-0.0398729	-0.298923	0.0547607			-0.0614079	-0.33667	0.0447385
-0.0434792	-0.349751	0.0474747			-0.0581157	-0.00913987	0.0128781			-0.0200543	-0.0383623	0.0178976			-0.0225656	-0.0133016	0.0094595			0.184196	-0.0318444	0.0174157			0.0788614	-0.0525868	0.00501307			0.13294	-0.168876	0.0201901			0.0288532	-0.2778	0.0223871			-0.0607101	-0.29923	0.0547713			-0.0530424	-0.332052	0.0437627
-0.0395707	-0.34579	0.0466139			-0.038959	-0.0090494	0.0138566			0.000173737	-0.037729	0.0176342			-0.0296403	-0.00950176	0.00978073			0.163001	-0.0333378	0.017195			0.0572548	-0.0510501	0.00521363			0.115383	-0.170975	0.0200495			0.0397476	-0.276026	0.0219491			-0.0329604	-0.297005	0.0541637			-0.041332	-0.327217	0.0426803
-0.0305935	-0.341895	0.0460887			-0.0367188	-0.0101351	0.013423			0.0216947	-0.0375481	0.0177843			-0.0111463	-0.010316	0.00975239			0.160588	-0.0357098	0.0169854			0.0413814	-0.0538674	0.00590087			0.102754	-0.172451	0.0198307			0.0267851	-0.276395	0.0213599			-0.0796193	-0.294472	0.0540925			-0.0332775	-0.329959	0.0417353
-0.0286193	-0.339159	0.0458849			-0.0457023	-0.00913987	0.0133149			0.0681974	-0.0362815	0.0185255			0.000709159	-0.0145682	0.009495			0.141711	-0.0306145	0.017678			0.0200946	-0.0499402	0.00623976			0.110644	-0.168565	0.019668			0.00836836	-0.272847	0.0213886			-0.104481	-0.287874	0.0533978			-0.0364088	-0.326928	0.0404204
-0.0311706	-0.333273	0.0453713			-0.0814447	-0.00760185	0.0136428			0.0599955	-0.0358291	0.0189534			0.0297133	-0.00877798	0.00944617			0.123968	-0.0333378	0.0186742			0.00111243	-0.0496841	0.00609282			0.102318	-0.165379	0.0207484			0.0130189	-0.267525	0.0217999			-0.0997626	-0.284728	0.0531547			-0.064198	-0.323176	0.0391779
-0.018525	-0.329509	0.0444532			-0.0981346	-0.00425439	0.0132339			0.0678014	-0.0393575	0.0186103			0.0343435	-0.00524958	0.0103215			0.10847	-0.0330743	0.0186096			0.00218514	-0.0487449	0.00625397			0.0882597	-0.160483	0.0217561			0.0209555	-0.264715	0.0216517			-0.0820054	-0.284114	0.0530455			-0.077723	-0.320289	0.0387206
-0.0153187	-0.328284	0.0437606			-0.100101	-0.00045457	0.0126308			0.0894089	-0.0373671	0.0179799			0.0248634	-0.0115826	0.0107572			0.0975874	-0.0315809	0.0189343			-0.00418773	-0.0492572	0.00699683			0.100176	-0.159551	0.0218693			-0.0252112	-0.262572	0.0218175			-0.104415	-0.280661	0.052969			-0.0666915	-0.315021	0.0380081
-0.0143748	-0.325811	0.0433438			-0.109455	-0.00244495	0.0123732			0.0818699	-0.0387242	0.0176955			0.0646863	-0.00868751	0.0111335			0.0994363	-0.0313173	0.0190736			0.0179356	-0.0457568	0.00827303			0.106771	-0.158463	0.0211383			-0.0111847	-0.260354	0.0217316			-0.0998933	-0.280584	0.0532984			-0.0581988	-0.310475	0.0368766
-0.00845587	-0.318721	0.0426635			-0.0786966	-0.00570194	0.0120437			0.0758916	-0.0375481	0.0172388			0.0416256	-0.00696855	0.0110127			0.0807939	-0.0328107	0.0193094			0.0472161	-0.0442201	0.00910235			0.0898717	-0.160017	0.0214885			0.0184398	-0.251409	0.0215666			-0.0771576	-0.279433	0.0538016			-0.0640384	-0.305496	0.0362297
-0.0121355	-0.31581	0.0419813			-0.0718703	-0.00307825	0.0113997			0.0832684	-0.0380909	0.0164822			0.0129058	-0.00886846	0.00999038			0.0870501	-0.0300874	0.0193852			0.0652764	-0.0473789	0.00975924			0.107671	-0.154577	0.0212716			0.0182336	-0.246383	0.0218742			-0.0816843	-0.273142	0.0544723			-0.0530536	-0.306001	0.0359612
-0.0279463	-0.313819	0.0418385			-0.0824248	-0.00434486	0.0114589			0.1009	-0.0391766	0.0158272			-0.00410677	-0.0100446	0.00942051			0.0468933	-0.026222	0.018377			0.0777931	-0.0459276	0.0101135			0.0977243	-0.151469	0.0201677			0.0205535	-0.246605	0.0215589			-0.102199	-0.270072	0.0556473			-0.0506428	-0.302104	0.0351691
-0.043262	-0.311412	0.0416895			-0.0852811	-0.00334967	0.0115981			0.106113	-0.0382718	0.0148022			9.41744e-05	-0.00651619	0.00833033			0.0552202	-0.0277155	0.0186365			0.0787148	-0.0443908	0.0107598			0.113105	-0.149059	0.0192578			0.0186807	-0.246531	0.0215671			-0.0885367	-0.271454	0.0558673			-0.0352055	-0.297197	0.0346418
-0.0440253	-0.309727	0.0414693			-0.0587607	-0.00497816	0.0115922			0.0921125	-0.0376385	0.014461			-0.00679846	-0.00597335	0.00734184			0.0531718	-0.0291211	0.0184094			0.0892429	-0.0451592	0.0115289			0.113703	-0.151002	0.0179109			0.0302061	-0.244683	0.0218878			-0.10078	-0.270303	0.0555575			-0.0282124	-0.294744	0.0343147
-0.033704	-0.308567	0.0414963			-0.0799791	-0.00606383	0.0111392			0.111256	-0.032934	0.0142789			0.0251559	-0.0090494	0.00637615			0.0584965	-0.0306145	0.0180378			0.0851404	-0.0478912	0.0121698			0.123313	-0.151469	0.0171357			0.0424085	-0.245348	0.0223552			-0.0940774	-0.26662	0.0549631			-0.0127457	-0.295177	0.0338707
-0.0391243	-0.306357	0.0411561			-0.0809354	-0.0061543	0.0109522			0.092018	-0.0316674	0.0140113			0.045826	-0.00995412	0.00606254			0.0759013	-0.0322837	0.017215			0.0833477	-0.0443908	0.0127153			0.0737753	-0.153644	0.0165616			0.0240502	-0.244313	0.0226518			-0.108871	-0.262937	0.0551397			-0.0436617	-0.294383	0.0333179
-0.0361104	-0.301367	0.0412302			-0.0916862	-0.00859704	0.0105317			0.0664557	-0.0334768	0.0133675			0.0374386	-0.00506864	0.00521191			0.0737459	-0.0296482	0.0159926			0.0892279	-0.0461837	0.0126387			0.045944	-0.150381	0.0156177			0.0546251	-0.240247	0.0223939			-0.101217	-0.261018	0.0556982			-0.0394583	-0.29229	0.0325139
-0.0387741	-0.299835	0.0410345			-0.0725759	-0.00506863	0.0101069			0.0459983	-0.0315769	0.0132224			0.039502	-0.00651619	0.00454113			0.0777655	-0.0283304	0.0147065			0.0845426	-0.0476351	0.0140514			0.0219737	-0.14836	0.0147596			0.0528337	-0.240321	0.0232753			-0.115006	-0.256645	0.0546794			-0.0597574	-0.293878	0.0322005
-0.0182834	-0.30093	0.0407708			-0.0710761	-0.0032592	0.00948796			0.0566807	-0.0317579	0.0129996			0.0253249	-0.00850657	0.00415966			0.0855588	-0.029736	0.0137024			0.0823201	-0.0468667	0.0151535			0.0266882	-0.148127	0.0136299			0.0543453	-0.246161	0.0236362			-0.0882184	-0.258256	0.0542853			-0.0443299	-0.290991	0.0319992
-0.0202348	-0.296006	0.0405572			-0.0852696	-0.00344014	0.00827223			0.0558798	-0.0325721	0.0127745			0.0204351	-0.00624477	0.00362216			0.0741365	-0.0302631	0.0125673			0.0775021	-0.0470374	0.0160462			0.0161558	-0.150925	0.0130942			0.024735	-0.24313	0.0245021			-0.0924768	-0.257182	0.0532378			-0.0458458	-0.285579	0.0311677
-0.0116844	-0.291017	0.0403182			-0.117123	-0.00570194	0.00818549			0.0879049	-0.0305817	0.0124931			-0.000145563	-0.00588289	0.00410155			0.0895474	-0.03325	0.011637			0.0744198	-0.0481473	0.0163092			0.0109275	-0.148904	0.0129919			0.0399074	-0.241134	0.0247393			-0.116786	-0.252271	0.053935			-0.034656	-0.287095	0.0312609
-0.0117568	-0.287865	0.0398444			-0.11229	-0.00244495	0.00770616			0.0947463	-0.0282295	0.0117394			0.0184453	-0.00696855	0.00389833			0.11189	-0.0290332	0.0104609			0.075019	-0.0458422	0.0165235			0.00211633	-0.143697	0.0128655			0.027132	-0.23803	0.0243258			-0.135162	-0.247054	0.0537379			-0.011842	-0.286301	0.0309067
-0.0191867	-0.284627	0.0393714			-0.147283	0.000269207	0.00707452			0.110074	-0.0303103	0.0123203			0.00622833	-0.00579241	0.00345072			0.0880691	-0.0272762	0.00949842			0.0712389	-0.0427687	0.0165787			0.0174906	-0.140744	0.012393			0.0454293	-0.235664	0.0236886			-0.105767	-0.245289	0.0531852			-0.0480041	-0.281971	0.0308921
-0.0249368	-0.279506	0.0391015			-0.137906	-0.000273625	0.00674472			0.117566	-0.0323912	0.0130437			0.0457423	0.000631098	0.00348498			0.0873371	-0.027979	0.00871758			0.0768323	-0.0426833	0.016464			-0.00977418	-0.139112	0.0118228			0.0688619	-0.230563	0.0236245			-0.117273	-0.244982	0.0536486			-0.0648097	-0.277281	0.0307051
-0.0354339	-0.277208	0.0385701			-0.127564	0.00135487	0.00647411			0.122418	-0.0318483	0.0126944			0.0639177	-0.00316873	0.00424254			0.0779921	-0.0287697	0.00834621			0.0597684	-0.0431102	0.0161915			-0.0297361	-0.137869	0.0118589			0.0592598	-0.22842	0.0233607			-0.131255	-0.241452	0.0532088			-0.0498122	-0.272085	0.0302084
-0.0464544	-0.274582	0.0380291			-0.151711	0.000721567	0.00632757			0.13439	-0.0303103	0.0124139			0.0995492	-0.00687807	0.0041698			0.0800844	-0.0298239	0.007675			0.0481628	-0.0396098	0.0162206			-0.0389044	-0.136936	0.0118064			0.0665589	-0.227828	0.0233837			-0.150695	-0.240992	0.0521737			-0.0325375	-0.26891	0.0300447
-0.0386242	-0.269659	0.0377907			-0.138264	-0.00353061	0.00580972			0.146677	-0.0299484	0.0128067			0.129874	-0.0045258	0.0041185			0.0851498	-0.0278033	0.00675973			0.0229299	-0.0397806	0.0160792			-0.0221584	-0.135071	0.0109306			0.0797608	-0.219697	0.0231781			-0.159416	-0.238613	0.0512734			-0.0165243	-0.26559	0.0297364
-0.0424707	-0.263947	0.0376623			-0.143207	-0.000635508	0.00497174			0.15773	-0.0304008	0.0131524			0.131561	-0.0045258	0.0046368			0.0921766	-0.02508	0.00639808			0.00318393	-0.0405489	0.0161928			-0.016564	-0.131574	0.0106508			0.0934296	-0.216001	0.0228405			-0.159319	-0.233473	0.0503792			-0.00446698	-0.262992	0.0292685
-0.050565	-0.263488	0.0373511			-0.138204	0.00072157	0.00460045			0.153667	-0.031396	0.0142587			0.176622	-0.00543053	0.00470591			0.0560799	-0.0232351	0.00600786			0.0351251	-0.0387561	0.0159166			-0.0507678	-0.127844	0.0104189			0.0779704	-0.215631	0.0231544			-0.149728	-0.232475	0.0501053			-0.0156546	-0.2609	0.0284833
-0.0587641	-0.263663	0.0368306			-0.127473	0.000540627	0.0048974			0.142936	-0.0288628	0.0145574			0.160046	-0.00534005	0.0049199			0.0373762	-0.0222688	0.00589094			0.0145719	-0.0383292	0.0154226			-0.0361957	-0.12831	0.00984731			0.0654162	-0.217405	0.0231919			-0.165664	-0.233626	0.050581			-0.00767281	-0.256426	0.0277457
-0.0629953	-0.260249	0.0362201			-0.113864	-0.00208306	0.00488965			0.135967	-0.0284104	0.0159136			0.154795	-0.0045258	0.00483274			0.0294766	-0.0260463	0.00607797			0.0199219	-0.0394391	0.0150732			-0.0548346	-0.129398	0.00931943			0.0700522	-0.213487	0.0224571			-0.144862	-0.23048	0.0512157			-0.0549108	-0.253106	0.027653
-0.0584709	-0.258411	0.0355178			-0.109149	-0.0045258	0.00498617			0.111403	-0.0256058	0.0166215			0.152776	-0.00769233	0.00426634			0.0386945	-0.0267491	0.00627387			0.0539142	-0.0413173	0.0142082			-0.0831906	-0.130253	0.00877186			0.0589212	-0.213487	0.0225466			-0.137939	-0.228178	0.0517265			-0.0523539	-0.255199	0.0270755
-0.0467936	-0.25677	0.0348032			-0.0941454	-0.00353061	0.00564594			0.109228	-0.0240677	0.0167721			0.134412	-0.00877798	0.00461251			0.0235057	-0.0236744	0.00628641			0.0612529	-0.0400367	0.013631			-0.066823	-0.128388	0.00817258			0.0446478	-0.215927	0.0224582			-0.147408	-0.223498	0.0520454			-0.0550634	-0.254116	0.0264474
-0.0380814	-0.253312	0.0341102			-0.0763944	-0.00497816	0.00644428			0.120592	-0.024882	0.0165638			0.1389	-0.00506863	0.00473301			0.0279992	-0.0243772	0.00663243			0.0427795	-0.0387561	0.0131507			-0.0779183	-0.128854	0.00739403			0.042034	-0.213487	0.0217342			-0.138096	-0.221119	0.0521096			-0.0621121	-0.252673	0.0259556
-0.0349123	-0.251539	0.0334637			-0.0821052	-0.00316872	0.00699329			0.122472	-0.0247915	0.0158256			0.14449	-0.00289731	0.00505335			0.0164672	-0.0240258	0.00745221			0.0563773	-0.0407197	0.0119566			-0.0705038	-0.125668	0.00705408			0.0263301	-0.211639	0.0210248			-0.142455	-0.220505	0.0519289			-0.0589728	-0.251013	0.0252623
-0.0356112	-0.250642	0.0328708			-0.0544661	-0.000545037	0.00837089			0.136451	-0.0250629	0.0155043			0.144529	-0.00570194	0.00522998			-0.00939204	-0.0259585	0.0074754			0.0674745	-0.0400367	0.0112395			-0.0336667	-0.126678	0.00673685			0.0301268	-0.215705	0.020565			-0.140866	-0.218587	0.0526814			-0.0489749	-0.249354	0.0246443
-0.0401674	-0.249636	0.0322383			-0.0327295	-0.00117834	0.00877827			0.130875	-0.023344	0.0149716			0.153987	-0.00624477	0.00621228			-0.0139366	-0.0251678	0.00754646			0.102188	-0.0396952	0.0114795			-0.00995525	-0.126445	0.00662577			0.0155802	-0.216518	0.0202282			-0.123253	-0.215518	0.0543868			-0.0518496	-0.246179	0.0236688
-0.0529034	-0.241801	0.0315749			-0.0412221	-0.00334967	0.0101187			0.162355	-0.0223488	0.0142287			0.137693	-0.00524958	0.00705667			0.0126152	-0.0248164	0.00808692			0.104992	-0.0395244	0.0114286			-0.0277263	-0.125279	0.00646573			0.0304878	-0.209643	0.0195781			-0.1128	-0.212449	0.0538247			-0.0349191	-0.244086	0.0229595
-0.0513244	-0.23841	0.0307487			-0.0242057	0.000269213	0.0112165			0.125727	-0.0221678	0.013517			0.13411	-0.00344014	0.00778539			0.0266911	-0.0232351	0.00925094			0.0897641	-0.0396098	0.0109379			-0.0216648	-0.122093	0.00609816			0.011142	-0.208535	0.0189766			-0.0667879	-0.208766	0.0539272			-0.054166	-0.244158	0.0227112
-0.0444983	-0.23749	0.0297735			-0.0246968	0.00271195	0.010947			0.122138	-0.0237059	0.0134067			0.163851	-0.00407345	0.00801873			0.0275463	-0.0211268	0.0106228			0.0925773	-0.0381584	0.0114921			-0.0227091	-0.118829	0.00575709			0.0205529	-0.208091	0.0190079			-0.0697408	-0.20631	0.0539243			-0.0564836	-0.24055	0.0221425
-0.0294647	-0.233223	0.0287725			-0.0572256	0.00207865	0.0108751			0.100834	-0.0242487	0.0129031			0.172374	-0.00307825	0.0092083			0.00259913	-0.0213903	0.0108838			0.0603079	-0.0346581	0.0111344			-0.0401889	-0.116731	0.00573476			0.0336954	-0.204247	0.019155			-0.056744	-0.20631	0.0550319			-0.065855	-0.233262	0.0215332
-0.0414744	-0.228693	0.0278014			-0.0896591	0.00235007	0.0108742			0.11624	-0.0251534	0.0125269			0.182876	-0.00135929	0.0097976			-0.0359836	-0.0242015	0.01095			0.0432306	-0.0345727	0.0114205			-0.0351664	-0.116264	0.00615969			0.0842761	-0.198555	0.018927			-0.0427954	-0.204239	0.0550242			-0.0613758	-0.227344	0.0210311
-0.026329	-0.227753	0.0269173			-0.0799169	0.00216912	0.0111168			0.128289	-0.0217155	0.0119436			0.185295	-0.00769233	0.0103696			-0.0174053	-0.0223567	0.0110581			0.0630891	-0.0340604	0.0110878			-0.04891	-0.113778	0.0060661			0.114166	-0.198777	0.0186651			-0.0354377	-0.201553	0.055266			-0.0963068	-0.229004	0.0205043
-0.0260139	-0.223726	0.0258318			-0.0788665	0.000178738	0.0106922			0.148064	-0.0219869	0.0112938			0.188688	-0.00760186	0.0110942			-0.0372205	-0.0191941	0.0122606			0.0763616	-0.0326944	0.0104841			-0.0904056	-0.113933	0.00615867			0.131003	-0.193159	0.0185775			-0.0609795	-0.19787	0.0550375			-0.106723	-0.224674	0.0197972
-0.0259083	-0.21878	0.0246794			-0.0816899	-0.0026259	0.0105749			0.1652	-0.0230726	0.0110714			0.189258	-0.0038925	0.0110786			-0.014878	-0.0174371	0.0121715			0.0441479	-0.0324383	0.0104451			-0.0790555	-0.109659	0.0066248			0.128137	-0.189463	0.0190593			-0.079721	-0.197026	0.0542537			-0.120028	-0.219984	0.0185404
-0.029838	-0.217052	0.0237987			-0.0918134	0.00162629	0.00997674			0.152319	-0.0243392	0.0110255			0.183027	-0.00407345	0.0114683			0.0139348	-0.018667	0.0115044			0.0595501	-0.0325237	0.00993115			-0.0669839	-0.106939	0.00714193			0.129849	-0.187689	0.0187499			-0.0349709	-0.192346	0.0536432			-0.0939362	-0.218613	0.018081
-0.0329718	-0.219962	0.0231742			-0.106907	0.00225959	0.00990689			0.158592	-0.0229821	0.0113098			0.147532	-0.00769232	0.0116645			0.016523	-0.0159436	0.0116518			0.0382563	-0.0332921	0.00889991			-0.072108	-0.10927	0.00718285			0.170592	-0.190128	0.0187611			-0.0531841	-0.192576	0.0527812			-0.0510473	-0.216231	0.0174463
-0.0634836	-0.216942	0.0221319			-0.0884574	-0.0016307	0.00969767			0.157837	-0.0195442	0.0117267			0.153401	-0.00588288	0.0108234			0.0211034	-0.0166464	0.011101			0.0347871	-0.0316699	0.00872418			-0.0710002	-0.111058	0.00750634			0.150199	-0.188945	0.0192644			-0.00954947	-0.190427	0.0518067			-0.0657827	-0.210963	0.0169146
-0.0577018	-0.213747	0.0210891			-0.0949451	-0.00515911	0.00952561			0.122269	-0.0204489	0.0118991			0.128234	-0.00570194	0.0101861			0.00320905	-0.0191941	0.0114052			0.0430921	-0.0316699	0.00866879			-0.0839007	-0.110358	0.00753067			0.149745	-0.185914	0.0196739			0.00499166	-0.186361	0.0511463			-0.0693109	-0.212912	0.0158917
-0.0700704	-0.211909	0.0202307			-0.116718	-0.00172117	0.00885734			0.103975	-0.0176442	0.0112349			0.144149	-0.00651619	0.00996936			0.00338133	-0.0173492	0.0113054			0.0344624	-0.0338897	0.00835698			-0.0701773	-0.107561	0.00848742			0.151377	-0.188354	0.0203222			-0.0076934	-0.183061	0.0502163			-0.0509933	-0.21587	0.01483
-0.0588467	-0.211559	0.0198549			-0.0999219	-0.00325919	0.00773309			0.117257	-0.018549	0.0113437			0.132687	-0.00714949	0.0093612			-0.0243397	-0.0148894	0.0110487			0.0461962	-0.0333774	0.00815302			-0.0595426	-0.107716	0.00896378			0.155387	-0.188723	0.0204845			0.0231304	-0.179225	0.0494941			-0.0328417	-0.212551	0.0145357
-0.0555317	-0.209349	0.0195765			-0.0991635	-0.00217353	0.00707156			0.132923	-0.019906	0.010718			0.111716	-0.00334967	0.00899398			-0.00530618	-0.0168221	0.0111766			0.0518092	-0.0314992	0.00780319			-0.0634989	-0.108338	0.0089584			0.131335	-0.187984	0.0199495			0.00936874	-0.180759	0.0487757			-0.0244001	-0.208149	0.0143585
-0.0630901	-0.207226	0.0187483			-0.102352	-0.00126881	0.00641775			0.126079	-0.0192727	0.00984058			0.0898471	-0.00497816	0.00834984			-0.0210731	-0.0198969	0.0108578			0.0336718	-0.0344873	0.00783202			-0.0656154	-0.109115	0.00971801			0.12695	-0.187097	0.0196486			0.0145069	-0.179148	0.0479997			-0.00479277	-0.208726	0.0141208
-0.0587886	-0.207007	0.0179052			-0.108513	-0.000725981	0.00587423			0.121404	-0.0171014	0.00950998			0.0702573	-0.00642572	0.00748733			0.0117905	-0.0178763	0.0106553			0.0234104	-0.0326091	0.00721772			-0.0643891	-0.10997	0.0100315			0.121548	-0.187615	0.0185024			0.0262606	-0.174698	0.0470752			-0.0288481	-0.209448	0.0136184
-0.051571	-0.201252	0.0171983			-0.116296	-0.00108787	0.00510357			0.122039	-0.0177347	0.00970887			0.0472045	-0.00434486	0.0068569			-0.0143855	-0.0168221	0.0104753			-0.00916564	-0.0307308	0.00649384			-0.0656986	-0.107017	0.0105975			0.117032	-0.183475	0.0181933			0.0131803	-0.16925	0.0455008			-0.0369616	-0.205263	0.0133076
-0.0595522	-0.195891	0.0166704			-0.13402	0.000178739	0.00424181			0.135483	-0.0189108	0.00963133			0.0547061	-0.00244495	0.00622979			-0.0100209	-0.0175249	0.0101677			-0.0339049	-0.0279988	0.00568773			-0.0548543	-0.102354	0.0108962			0.0939616	-0.18207	0.017672			0.0252781	-0.167409	0.0451719			-0.0282839	-0.204685	0.0134465
-0.0555934	-0.195869	0.0160852			-0.110677	0.00560705	0.00363468			0.117411	-0.0205393	0.00865273			0.0800281	-0.00416392	0.00598261			0.00381124	-0.0157679	0.00920349			0.000318586	-0.0309869	0.00575655			-0.0755827	-0.100566	0.0106255			0.0832907	-0.179853	0.01744			0.026224	-0.166718	0.0450162			-0.0325243	-0.20151	0.0133113
-0.0500403	-0.194906	0.0154758			-0.114418	0.00271195	0.00394963			0.114157	-0.0184585	0.0079968			0.0960788	-0.00334967	0.00590578			-0.011769	-0.0123418	0.00825464			-0.00603094	-0.0270597	0.00582499			-0.10587	-0.0984682	0.0104562			0.0799446	-0.177339	0.01712			0.0101973	-0.166104	0.0445022			-0.0338174	-0.194583	0.0126304
-0.0647266	-0.19042	0.0148419			-0.126761	0.00271195	0.00410741			0.127313	-0.0206298	0.00789646			0.0909278	-0.00289731	0.00557949			-0.0141847	-0.0164707	0.00757242			-0.00275651	-0.0224494	0.0051997			-0.084445	-0.098779	0.0105192			0.0664195	-0.17283	0.0161508			0.0277673	-0.16526	0.0440442			-0.0475351	-0.191696	0.0117706
-0.0672403	-0.186175	0.01443			-0.0977173	0.00108346	0.00356755			0.156443	-0.0193632	0.00807132			0.0564222	-0.00534005	0.00665361			-0.0066737	-0.0136595	0.00681599			-0.00440472	-0.0259498	0.00451932			-0.0772147	-0.0980019	0.0110103			0.0470689	-0.168617	0.0152457			0.0191869	-0.160963	0.0426596			-0.0456239	-0.191624	0.011269
-0.0645868	-0.184883	0.0145117			-0.109804	0.00108346	0.00406214			0.128382	-0.0197251	0.00787139			0.0945405	-0.00805421	0.00718299			-0.0228735	-0.0107605	0.00661511			-0.00683383	-0.0254376	0.00409505			-0.0771046	-0.0955928	0.0106659			0.0536361	-0.165881	0.0151678			0.00678395	-0.156666	0.0424743			-0.0428127	-0.191119	0.0106954
-0.0625078	-0.181513	0.0138906			-0.125369	0.000812043	0.00503842			0.125686	-0.020087	0.00747008			0.077981	-0.00534005	0.00815706			-0.0267258	-0.0101456	0.00613027			-0.010763	-0.0204858	0.00367085			-0.0703634	-0.0924843	0.010364			0.0533082	-0.163294	0.0144913			-0.000553667	-0.15682	0.0426651			-0.0353557	-0.185346	0.0106258
-0.0610337	-0.180638	0.0131529			-0.0994318	0.00072157	0.00699475			0.101559	-0.0199965	0.00747245			0.0729776	-0.00380203	0.00949016			-0.0324048	-0.0105848	0.00537571			0.00481144	-0.0218518	0.00345468			-0.048385	-0.0927951	0.0106355			0.0257926	-0.161077	0.0133515			-0.0255465	-0.155285	0.0426424			0.019431	-0.181016	0.0102403
-0.0639294	-0.18217	0.0126101			-0.125164	-0.000635513	0.00706261			0.0939462	-0.0184585	0.00785792			0.0675731	-0.00796374	0.0101987			-0.0334396	-0.011024	0.0050191			0.0176421	-0.0242423	0.00321237			-0.0560613	-0.0951265	0.0105109			0.0241702	-0.16322	0.0128793			-0.0315656	-0.152139	0.0430406			0.0254372	-0.18347	0.00985846
-0.083299	-0.18136	0.012176			-0.132045	-0.00172118	0.00688372			0.0687461	-0.0149301	0.00886318			0.060228	-0.00886846	0.0108127			-0.0368607	-0.010497	0.00512116			-0.00874182	-0.0224494	0.00266821			-0.0691473	-0.0961368	0.0102204			0.0329777	-0.162999	0.0128921			-0.0543396	-0.150144	0.0418753			0.057051	-0.178707	0.00979691
[truncated: 2,708 more rows]
[truncated: 3 more columns]

## Sheet: +0.1mm
	Mean-Cycles
	Baseline		Time Bin Post-Injection:			2min					4min					6min					8min					10min					12min					14min					16min					18min
[truncated: 4,002 more rows]
[truncated: 3 more columns]

## Sheet: +0.4mm
	Mean-Cycles
[truncated: 4,003 more rows]
[truncated: 3 more columns]

[truncated: 2 more sheets: +0.6mm, +0.8mm]
